# Supplementary material for: Sumoylation of Rap1 mediates the recruitment of TFIID to promote transcription of ribosomal protein genes
Source: HighWire-hosted journal article supplement (doi:10.1101/gr.185793.114), 2015-03-23
Supplement: Supplemental_information.docx [file Supplemental_information.docx]

**SUPPLEMENTAL EXPERIMENTAL PROCERURES**

*ChIP assays*

Cells were fixed with 1% (vol/vol) formaldehyde for 30 min. Formaldehyde was quenched for 5 min by adding glycine to a final concentration of 125 mM. Cells were washed with cold Tris-buffered saline, resuspended in lysis buffer [50 mM Hepes- KOH (pH 7.5), 140 mM NaCl, 1 mM EDTA, 1% (vol/vol) Triton X-100, 0.1% (wt/vol) Na-deoxycholate, and protease inhibitor mixture] and were sonicated twice for 15 min by performing alternating cycles of 30s pulses followed by a 30s cool-down period using a Diagenode Bioruptor Twin. After centrifugation, supernatants were immunoprecipitated at 4°C. Beads were first washed with lysis buffer, followed by washing with lysis buffer containing 500 mM NaCl, then with wash buffer [10 mM Tris (pH 8.0), 250 mM LiCl, 0.5% (vol/vol) Nonidet P-40, 0.5% (wt/vol) Na-deoxycholate and 1 mM EDTA], and finally with a buffer (pH 8.0) containing 10 mM Tris and 1 mM EDTA. Elutions were performed in 50 mM Tris (pH 8.0), 10 mM EDTA, 1% (vol/vol) SDS at 65°C, and the cross-link was reversed 5 hours at 65°C. After RNase and proteinase K treatment, DNA fragments were purified using QIAquick PCR purification kit (Qiagen) and analysed by qPCR using an AB StepOnePlus machine (Applied Biosystems).

*ChIP-seq and RNA seq*

For ChIP-seq, library preparation of the immunoprecipitated DNA fragments was done using the Illumina ChIP-Seq Sample Preparation Kit following manufacturer’s instructions, with minor modifications. Libraries were prepared using DNA obtained from the different strains both before (“inputs”) and after immunoprecipitation. Approximately 5 ng of immunoprecipitated DNA was end-repaired, A-tailed, and ligated according to the Illumina protocol. The adapter-ligated DNA was amplified for 18 cycles using Illumina’s PCR primers. Amplified libraries were size selected by agarose gel electrophoresis and fragments in the size range 260**–**290 bp were excised and purified. DNA libraries were quantified using qPCR. Approximately 8 pmol of each library was used for cluster generation in the flow cell. Cluster generation was performed using a cBot (Illumina), and 36-bp single- end sequencing was achieved on a GenomeAnalyzer IIx (Illumina) following Illumina’s instructions. The sequencing of the libraries was performed according to Illumina’s Genome Analyzer IIx system to generate sequences (reads) 36 bp long from one end of each DNA fragment (single-end sequencing). Each library was sequenced in one lane of the flow cell. The image analysis was carried out via Illumina’s image analysis software SCS2.8/RTA1.8, with base calling and quality filtering using the Illumina Pipeline1.8.

For RNA-seq*,* total RNA was subjected to ribosomal depletion using the Ribominus yeast transcriptome isolation kit (Invitrogen) and RNA-seq libraries prepared using the TruSeq Stranded total RNA kit (Illumina), both kits used according to manufacturers recommendations. Paired-end, 102 nt long reads were generated using GenomeAnalyzer IIx (Illumina). Image analysis was carried out using Illumina**’**s image analysis software SCS2.8/RTA1.8 and base calling and quality filtering using the Illumina Pipeline1.8.

Reads from RNA-seq were mapped with STAR version 2.3.0e (Dobin et al. 2013) using options restricting reporting to reads mapping to 5 or less positions, with less than 0.05 ratio of mismatches compared to read length, and discarding reads mapping to non-canonical splice junctions. Gene level quantification was performed with version 2.2.1 (Trapnell et al. 2013) using the library type option “fr-firststrand”. Sample 10 (*ubc9-1* treated with rapamycin replicate 1) was removed from further analysis due to very low percentage of mapped reads compared to all other samples. Clusters of genes were extracted and visualized in R.

*Sequencing data analysis*

Metagenes and heatmaps were constructed using Homer (Hypergeometric Optimization of Motif EnRichment) version 4.6 (Heinz et al. 2010). Homer tag libraries were made using the -keepAll option. Histogram matrices were made using annotatePeaks.pl in TSS mode and arguments -hist 10 and -size 4000. Annotation from Ensembl was used as input. Values were normalized to 107 and in addition we normalized to the appropriate control by subtracting the control bin value from the ChIP bin. To make heatmap matrices we added the -ghist variable. Motif discovery was performed using findMotifsGenome.pl in Homer with the arguments -S 10 -size 300 and default background.

*Gene synthesis*

The *rap1* alleles were synthesized and subcloned into pDONR221 by Genscript and confirmed by sequencing.

*Construction of a mutant strain lacking the Rap1 binding site at RPS19B*

We constructed two strains; control strain JEY11257 with a normal Rap1 UAS (“*RPS19B_UASRAP1*” in Fig. 3F) and mutant strain JEY11258 in which the Rap1 UAS was replaced with a scrambled sequence (“*RPS19B_UASRAP1SS*”). To create strain JEY11257, the nourseothricin resistance (*NAT*) cassette was amplified from pFA6::NAT (Janke et al. 2004) with forward primer “*RPS19B-F*” (see table below for primer sequences) and reverse primer “*RPS19B-R_WT*”. This cassette was then inserted 5’ of the Rap1 UAS (facilitating genetic tractability), leaving the Rap1 UAS intact. The presence of the *NAT* cassette neither affected recruitment of Rap1 nor sumoylation at this genomic location. To create mutant strain JEY11258, the NAT cassette was amplified with forward primer “*RPS19B-F*” and reverse primer “*RPS19B-R_mut*”. This inserted the NAT cassette in the same location as in control strain JEY11257, but replaced the Rap1 UAS with a scrambled sequence that did not conform to any known transcription factor-binding site (source: oPossum 3.0 (Kwon et al. 2012)).

*Cell lysis, immunoprecipitation and Western blotting*

For Western blotting, equal numbers of cells were harvested, centrifuged, resuspended in Laemmli buffer, and incubated at 95°C for 5 min. Extracts were then centrifuged at 15,000g for 5 min at RT, and supernatants were resolved by SDS-PAGE. Small scale TCA extractions for Western blot analysis were performed as previously described (Sacher et al. 2005). For immunoprecipitation, equal amounts of cells were harvested and washed with lysis buffer [50 mM Tris-HCl (pH 8.0) , 100 mM NaCl,  1 mM EDTA,  5 mM MgCl2 , 1 mM DTT,  10% glycerol, 10 mM N-Ethylmaleimide (NEM), protease inhibitors mixture]. Pre-chilled glass beads were added, and cells were disrupted in a bead mill for 10 min at 4°C. After centrifugation, equal amounts of extracts were mixed with magnetic beads and antibodies, and immunoprecipitations were carried out ON at 4°C. After 4 washes with lysis buffer containing 200 mM NaCl, proteins were eluted with Laemmli buffer, and resolved by SDS-PAGE.

*Sumo pull-down under denaturing conditions*

One litre of cells expressing the HIS6-FLAG-tagged protein of interested was grown until log phase, harvested by centrifugation, washed with cold water and frozen in liquid nitrogen. The frozen pellet was resuspended in cold lysis buffer (1.85 M NaOH, 7.5% **‐**mercaptoethanol) to a final volume of 25 ml. After 20 min on ice, an equal volume of cold 55% trichloroacetic acid (TCA) was added and kept on ice for 20 min. Proteins were pelleted by centrifugation (20 min, 4°C, 3500g), and the pellet was washed with cold water. The pellet was resuspended in 25 ml of buffer A (6 M guanidine**‐**HCl, 100 mM NaH2PO4, 10 mM Tris/HCl; adjusted to pH 8.0) supplemented with 0.05% Tween 20. The suspension was shaken for 1h at room temperature. Insoluble material was removed by centrifugation (20 min, 4°C, 15,000g), and the supernatant was transferred into a fresh tube and supplemented with imidazole to a final concentration of 10 mM. 150 µl of Ni**‐**NTA agarose beads (Qiagen) were added to the sample and samples were incubated overnight (ON) at 4°C under agitation. The beads were then washed with 35 bed volumes of buffer A supplemented with 0.05% Tween 20, 50 bed volumes of buffer C (8 M urea, 100 mM NaH2PO4, 10 mM Tris/HCl; adjusted to pH 6.3) supplemented with 0.05% Tween 20, and 50 bed volumes of buffer C. Proteins bound to the Ni**‐**NTA column were eluted in four subsequent steps with 1 bed volume of buffer C plus 250 mM imidazole and the eluates were pooled. One volume of 55% TCA was added to the eluate and left on ice for 20 min before centrifugation (20 min, 4°C, 3500g). Proteins were resuspended in 25 µl of buffer HU (8 M urea, 5% SDS; 200 mM Tris/HCl pH 6.8; 1.5% DTT) plus 10 µl of water, and denatured for 10 min at 65°C. All buffers contained NEM to prevent desumoylation.

*Antibodies and reagents*

Anti-Flag M2 magnetic beads were from Sigma and anti-HA-coupled magnetic beads from Pierce; protein A and G-coupled magnetic beads from Dynal; Anti-GFP, -HA, -Ubc9 and -Taf3 antibodies from Abcam; anti-Rap1 y300 and PolII 8WG16 from Santa Cruz Biotechnology; Anti-Sumo from Rockland Immunochemicals; Rapamycin from AH Diagnostics and cycloheximide from Biovision.

*Mass spectrometry*

Cells expressing 6His-FLAG-tagged Sumo from the endogenous *SMT3* promoter (*HIS6-FLAG-SMT3*)were prepared as for a regular ChIP assay until the IP step (see above). For this step, 700 µg of cross-linked material was mixed with 50 µl of FLAG magnetic beads (Sigma). After an overnight incubation at 4°C, beads were washed 3 times with TBS + 0.01% NP40 + 500 mM NaCl, twice with TBS + 0.01% NP40 and once with TBS. Sumo-containing complexes were then eluted with the FLAG peptide (100 ng/µl), 60 min at 25°C under agitation. After addition of 40 µl of 1X Laemmli sample buffer, the eluates were incubated for 30 min at 95°C to reverse the cross-link. These samples were resolved by SDS-PAGE and Coomassie staining, and each lane was cut into 12 pieces for further MS analysis.

For MS analysis, peptides were analysed by a ESI-Orbitrap (LTQ Orbitrap XL, Thermo Scientific, Bremen, Germany) mass spectrometer coupled to a nano-LC system. Peptides were purified by C18 ZipTips (Millipore, Billerica, MA, USA) before injected into an Ultimate 3000 nanoLC system (Dionex, Sunnyvale CA). For separation of peptides an Acclaim PepMap 100 column (50 cm x 75 μm) packed with 100 Å C18 3 µm particles (Dionex) was used. A flow rate of 300 nL/min was employed with a solvent gradient of 7-35% B in 77 min, to 50% B in 10 min and then to 80% B in 2 min. Solvent A was 0.1% formic acid and solvent B was 0.1% formic acid/90% ACN. The mass spectrometer was operated in the data-dependent mode to automatically switch between Orbitrap-MS and LTQ-MS/MS acquisition. Survey full scan MS spectra (from m/z 300 to 2000) were acquired in the Orbitrap with the resolution R = 60 000 at m/z 400 (after accumulation to a target of 500 000 charges in the LTQ). The method used allowed sequential isolation of the most intense ions, up to seven, depending on signal intensity, for fragmentation on the linear ion trap using collision induced dissociation (CID) at a target value of 10 000 charges. For accurate mass measurements, the lock mass option was enabled in MS mode and the polydimethylcyclosiloxane ions generated in the electrospray process from ambient air were used for internal recalibration during the analysis. Target ions already selected for MS/MS were dynamically excluded for 60 sec. Data were acquired using Xcalibur v2.5.5 and processed using Scaffold v.3.5.2.

*Primers*

| **ChIP target** | **Sequence** |
| --- | --- |
| ***IMT1*** | **GAAGCGCGCAGGGCTCATAA** |
|  | **TAGCGCCGCTCGGTTTCGAT** |
| ***tDNA(W)*** | **GGAATTTCCAAGATTTAATTGGAGTCG** |
|  | **TGGCTCAATGGTAGAGCTTTCG** |
| ***SNR52*** | **GCACCAACTTTCACTTCTACAGCG** |
|  | **TTTGTAGTGCCCTCTTGGGCTA** |
| ***RPL35Ap*** | **CTCAGACCCATACATATCTACACCC** |
|  | **TGGAGTGCCAGGTAAGTTGTCGT** |
| ***RPL35A* ORF1** | **GACTGACAACTGCAGAAC** |
|  | **CATAGCCAACGGATGAATTA** |
| ***RPL35A* ORF2** | **GTTGTCCAGACCATCTTTG** |
|  | **GTCTAACAGCTTCTCTTTGTT** |
| ***RPL43Ap*** | **GAACAACAGCCGGGTTACCAAA** |
|  | **TCTCACATAACACTGAGTGAGCCG** |
| ***ACT1*** | **CTCAAAGCAAGCGTGGTATTT** |
|  | **TCTTTTCCATATCATCCCAGTTG** |
| ***ChV*** | **TAGCCGCCGAAGGTAATTGTATCC** |
|  | **ACGATAGGTGACTGCGGATCTTAG** |
| ***PMA1*** | **GATCCACCAAGAGACGATACTGCT** |
|  | **ACCGCCACCTAGACCTAATCTTTC** |
| ***RPS19Bp*** | **CCTTTGGTGCACTATTGAT** |
|  | **CAAACGCGCCTAATTTATTC** |
| ***SCR1*** | **GGATGGGATACGTTGAGA** |
|  | **GGTGCGGAATAGAGAACTA** |
| **Expression analysis** | **Sequence** |
| ***IMT1*** | **GAAGCGCGCAGGGCTCATAA** |
|  | **TAGCGCCGCTCGGTTTCGAT** |
| ***tDNA(W)*** | **GGAATTTCCAAGATTTAATTGGAGTCG** |
|  | **TGGCTCAATGGTAGAGCTTTCG** |
| ***RPL35A*** | **GATGCCTGTGCTTGTTAG** |
|  | **CCTTGGATTTGGTTCTTAGT** |
| ***RPL43A*** | **TGGTAAGTACGGTGTCCGTTATGG** |
|  | **GCACCTCTCTTGACGGTCTTCTTA** |
| ***PMA1*** | **GATCCACCAAGAGACGATACTGCT** |
|  | **ACCGCCACCTAGACCTAATCTTTC** |
| ***ACT1*** | **GTACTAACATCGATTGCTTCA** |
|  | **AAACCGGCTTTACACATAC** |
| **Mutation of Rap1-UAS at *RPS19B*** | **Sequence (the Rap1_UAS sequence and the mutant, scrambled UAS sequence are underlined)** |
|  |  |
| *RPS19B-F* | CACACTTTTCCCATTTTTTTTCAATACTACTTTACATCCGAACATTTTCGTACGCTGCAGGTCGAC |
| *RPS19B-R_WT* | TTGTCAAAGCACAAAAAGCTGACATCAGGAAGAAAATCAATAGTGCACCAAAGGTATATGGTGTGGGTTGCTATCGATGAATTCGAGCTCG |
| *RPS19B-R_mut* | TTGTCAAAGCACAAAAAGCTGACATCAGGAAGAAAATCAATAGTGCACCAAAGGTATAACGTGCCCTAGGCTATCGATGAATTCGAGCTCG |

**References**

Dobin A, Davis CA, Schlesinger F, Drenkow J, Zaleski C, Jha S, Batut P, Chaisson M, Gingeras TR. 2013. STAR: ultrafast universal RNA-seq aligner. *Bioinformatics* **29**(1): 15-21.

Heinz S, Benner C, Spann N, Bertolino E, Lin YC, Laslo P, Cheng JX, Murre C, Singh H, Glass CK. 2010. Simple combinations of lineage-determining transcription factors prime cis-regulatory elements required for macrophage and B cell identities. *Molecular cell* **38**(4): 576-589.

Janke C, Magiera MM, Rathfelder N, Taxis C, Reber S, Maekawa H, Moreno-Borchart A, Doenges G, Schwob E, Schiebel E et al. 2004. A versatile toolbox for PCR-based tagging of yeast genes: new fluorescent proteins, more markers and promoter substitution cassettes. *Yeast* **21**(11): 947-962.

Kwon AT, Arenillas DJ, Worsley Hunt R, Wasserman WW. 2012. oPOSSUM-3: advanced analysis of regulatory motif over-representation across genes or ChIP-Seq datasets. *G3* **2**(9): 987-1002.

Sacher M, Pfander B, Jentsch S. 2005. Identification of SUMO-protein conjugates. *Methods in enzymology* **399**: 392-404.

Trapnell C, Hendrickson DG, Sauvageau M, Goff L, Rinn JL, Pachter L. 2013. Differential analysis of gene regulation at transcript resolution with RNA-seq. *Nature biotechnology* **31**(1): 46-53.
