# Supplementary material for: Sumoylation of Rap1 mediates the recruitment of TFIID to promote transcription of ribosomal protein genes
Source: HighWire-hosted journal article supplement (doi:10.1101/gr.185793.114), 2015-03-23
Supplement: Table_S1_-_Sumo_ChIP-seq.xlsx [file Table_S1_-_Sumo_ChIP-seq.xlsx]

## Sheet: Legend
Table S1. Sumo ChIP-seq experiment.
Tab1. All Sumo peaks
All Sumo peaks, dataset filtered with a log10 p-value of 6. This dataset containes 670 Sumo peaks corresponding to 631 unique ORFs.
Tab2. High Sumo peaks
Manually curated dataset consisting of Sumo peaks that pass filtering with a log10 p-value of 20. This stringent dataset contains 423 Sumo peaks corresponding to 395 unique ORFs.

## Sheet: 1. All Sumo peaks
space	start	end	width	names	peak	strand	feature	start_position	end_position	insideFeature	distancetoFeature	shortestDistance	fromOverlappingOrNearest		Gene > Standard Name	Gene > Name
XIV	585422	585679	258	sumo_peak_830 NME1	sumo_peak_830	+	NME1	585587	585926	overlapStart	-37	92	NearestStart		NME1
Mito	73806	74449	644	sumo_peak_255 Q0255	sumo_peak_255	+	Q0255	74495	75984	upstream	-367	46	NearestStart
Mito	79226	79987	762	sumo_peak_256 Q0275	sumo_peak_256	+	Q0275	79213	80022	inside	393	13	NearestStart		COX3	Cytochrome c OXidase
XII	472299	472765	467	sumo_peak_642 RDN5-3	sumo_peak_642	+	RDN5-3	472465	472583	includeFeature	67	166	NearestStart		RDN5-3
XII	481922	482343	422	sumo_peak_644 RDN5-4	sumo_peak_644	+	RDN5-4	482045	482163	includeFeature	87	123	NearestStart		RDN5-4
XII	485521	485948	428	sumo_peak_645 RDN5-5	sumo_peak_645	+	RDN5-5	485697	485815	includeFeature	37	133	NearestStart		RDN5-5
XII	489170	489573	404	sumo_peak_646 RDN5-6	sumo_peak_646	+	RDN5-6	489349	489469	includeFeature	23	104	NearestStart		RDN5-6
XIII	667166	667438	273	sumo_peak_769 RNA170	sumo_peak_769	-	RNA170	667288	667456	overlapEnd	154	18	NearestStart		RNA170
V	117475	118306	832	sumo_peak_268 RPR1	sumo_peak_268	-	RPR1	117667	118035	includeFeature	145	192	NearestStart		RPR1	RNase P Ribonucleoprotein
VI	221680	222095	416	sumo_peak_344 RUF23	sumo_peak_344	+	RUF23	221714	221967	includeFeature	174	34	NearestStart		RUF23	RNA of Unknown Function
VIII	212275	216230	3956	sumo_peak_466 RUF5-1	sumo_peak_466	+	RUF5-1	212409	213118	includeFeature	1843	134	NearestStart		RUF5-1	RNA of Unknown Function
V	441842	442667	826	sumo_peak_317 SCR1	sumo_peak_317	+	SCR1	441987	442508	includeFeature	267	145	NearestStart
X	139083	140301	1219	sumo_peak_495 snR128	sumo_peak_495	-	snR128	139566	139691	includeFeature	-1	483	NearestStart		SNR128	Small Nucleolar RNA
IV	1402010	1403398	1389	sumo_peak_202 snR13	sumo_peak_202	+	snR13	1402919	1403042	includeFeature	-215	356	NearestStart		SNR13	Small Nucleolar RNA
V	167487	167707	221	sumo_peak_278 snR14	sumo_peak_278	-	snR14	167427	167586	overlapStart	-11	60	NearestStart		SNR14	Small Nuclear RNA
XVI	280587	281951	1365	sumo_peak_947 snR17b	sumo_peak_947	-	snR17b	281056	281517	includeFeature	248	434	NearestStart		SNR17B	Small Nucleolar RNA
XIV	229629	230880	1252	sumo_peak_803 snR19	sumo_peak_803	-	snR19	230105	230672	includeFeature	418	208	NearestStart		SNR19	Small Nuclear RNA
XIII	499047	500777	1731	sumo_peak_753 snR24	sumo_peak_753	-	snR24	499984	500072	includeFeature	160	705	NearestStart		SNR24	Small Nucleolar RNA
X	663535	664411	877	sumo_peak_542 snR3	sumo_peak_542	+	snR3	663749	663942	includeFeature	224	214	NearestStart		SNR3	Small Nucleolar RNA
XII	198573	199756	1184	sumo_peak_621 snR30	sumo_peak_621	+	snR30	198784	199389	includeFeature	380	211	NearestStart		SNR30	Small Nucleolar RNA
VIII	381345	383322	1978	sumo_peak_472 snR32	sumo_peak_472	+	snR32	381540	381727	includeFeature	794	195	NearestStart		SNR32	Small Nucleolar RNA
XV	758961	759736	776	sumo_peak_903 snR35	sumo_peak_903	-	snR35	759326	759529	includeFeature	181	207	NearestStart		SNR35	Small Nucleolar RNA
X	227712	228678	967	sumo_peak_505 snR37	sumo_peak_505	-	snR37	228094	228479	includeFeature	284	199	NearestStart		SNR37	Small Nucleolar RNA
XI	283232	284482	1251	sumo_peak_575 snR38	sumo_peak_575	+	snR38	283185	283279	overlapEnd	672	47	NearestStart		SNR38	Small Nucleolar RNA
V	424447	425485	1039	sumo_peak_312 snR4	sumo_peak_312	+	snR4	424698	424883	includeFeature	268	251	NearestStart		SNR4	Small Nucleolar RNA
XIV	88890	89741	852	sumo_peak_796 snR40	sumo_peak_796	+	snR40	89210	89306	includeFeature	106	320	NearestStart		SNR40	Small Nucleolar RNA
XI	558698	559547	850	sumo_peak_599 snR42	sumo_peak_599	-	snR42	559016	559366	includeFeature	244	181	NearestStart		SNR42	Small Nucleolar RNA
XVI	821542	822335	794	sumo_peak_997 snR45	sumo_peak_997	+	snR45	821732	821903	includeFeature	206	190	NearestStart		SNR45	Small Nucleolar RNA
VII	545331	545845	515	sumo_peak_395 snR46	sumo_peak_395	+	snR46	545370	545566	includeFeature	218	39	NearestStart		SNR46	Small Nucleolar RNA
IV	541318	541954	637	sumo_peak_148 snR47	sumo_peak_148	-	snR47	541602	541700	includeFeature	64	254	NearestStart		SNR47	Small Nucleolar RNA
VII	609240	610146	907	sumo_peak_400 snR48	sumo_peak_400	+	snR48	609584	609696	includeFeature	109	344	NearestStart		SNR48	Small Nucleolar RNA
XIV	715897	716677	781	sumo_peak_842 snR49	sumo_peak_842	+	snR49	716120	716284	includeFeature	167	223	NearestStart		SNR49	Small Nucleolar RNA
XV	842216	842562	347	sumo_peak_910 snR5	sumo_peak_910	+	snR5	842403	842606	overlapStart	-14	44	NearestStart		SNR5	Small Nucleolar RNA
V	430987	431531	545	sumo_peak_313 snR52	sumo_peak_313	-	snR52	431129	431220	includeFeature	-39	142	NearestStart		SNR52	Small Nucleolar RNA
XIII	161886	163655	1770	sumo_peak_727 snR54	sumo_peak_727	-	snR54	163535	163620	includeFeature	850	35	NearestStart		SNR54	Small Nucleolar RNA
II	87874	89134	1261	sumo_peak_22 snR56	sumo_peak_22	+	snR56	88190	88277	includeFeature	314	316	NearestStart		SNR56	Small Nucleolar RNA
XII	366054	366566	513	sumo_peak_634 snR6	sumo_peak_634	+	snR6	366235	366346	includeFeature	75	181	NearestStart		SNR6	Small Nuclear RNA
IV	323046	323559	514	sumo_peak_119 snR63	sumo_peak_119	-	snR63	323217	323471	includeFeature	169	88	NearestStart		SNR63	Small Nucleolar RNA
XI	38470	39169	700	sumo_peak_550 snR64	sumo_peak_550	+	snR64	38811	38911	includeFeature	9	258	NearestStart		SNR64	Small Nucleolar RNA
III	177161	177929	769	sumo_peak_89 snR65	sumo_peak_89	+	snR65	177183	177282	includeFeature	362	22	NearestStart		SNR65	Small Nucleolar RNA
XIV	585756	586621	866	sumo_peak_831 snR66	sumo_peak_831	+	snR66	586090	586175	includeFeature	98	334	NearestStart		SNR66	Small Nucleolar RNA
V	60978	62167	1190	sumo_peak_259 snR67	sumo_peak_259	+	snR67	61352	61433	includeFeature	220	374	NearestStart		SNR67	Small Nucleolar RNA
VII	938999	939876	878	sumo_peak_437 snR7-S	sumo_peak_437	-	snR7-S	939494	939672	includeFeature	234	204	NearestStart		SNR7-S	Small Nuclear RNA
VIII	410921	411661	741	sumo_peak_474 snR71	sumo_peak_474	+	snR71	411228	411317	includeFeature	63	307	NearestStart		SNR71	Small Nucleolar RNA
XIII	296852	298875	2024	sumo_peak_742 snR78	sumo_peak_742	+	snR78	297278	297364	includeFeature	586	426	NearestStart		SNR78	Small Nucleolar RNA
XII	350371	351191	821	sumo_peak_633 snR79	sumo_peak_633	-	snR79	348427	348510	upstream	-2271	1861	NearestStart		SNR79	Small Nucleolar RNA
XV	832126	832901	776	sumo_peak_909 snR8	sumo_peak_909	+	snR8	832332	832521	includeFeature	182	206	NearestStart		SNR8	Small Nucleolar RNA
XIII	625931	626879	949	sumo_peak_764 snR83	sumo_peak_764	+	snR83	626349	626654	includeFeature	56	225	NearestStart		SNR83	Small Nucleolar RNA
IV	1492109	1492706	598	sumo_peak_213 snR84	sumo_peak_213	-	snR84	1492477	1493026	overlapEnd	618	229	NearestStart		SNR84	Small Nucleolar RNA
XIII	761302	762515	1214	sumo_peak_776 snR86	sumo_peak_776	-	snR86	762110	763113	overlapEnd	1205	405	NearestStart		SNR86
XV	407649	408337	689	sumo_peak_877 snR9	sumo_peak_877	-	snR9	407948	408134	includeFeature	141	203	NearestStart		SNR9	Small Nucleolar RNA
V	321986	323260	1275	sumo_peak_301 SRG1	sumo_peak_301	+	SRG1	322212	322762	includeFeature	411	226	NearestStart		SRG1	SER3 Regulatory Gene
IV	410224	410720	497	sumo_peak_129 tA(AGC)D	sumo_peak_129	+	tA(AGC)D	410379	410451	includeFeature	93	155	NearestStart
VI	204791	205139	349	sumo_peak_341 tA(AGC)F	sumo_peak_341	-	tA(AGC)F	204924	204996	includeFeature	31	133	NearestStart
VII	774166	774529	364	sumo_peak_413 tA(AGC)G	sumo_peak_413	+	tA(AGC)G	774349	774421	includeFeature	-1	108	NearestStart
VIII	145987	146469	483	sumo_peak_462 tA(AGC)H	sumo_peak_462	-	tA(AGC)H	146242	146314	includeFeature	86	155	NearestStart
X	197229	197584	356	sumo_peak_503 tA(AGC)J	sumo_peak_503	-	tA(AGC)J	197313	197385	includeFeature	-21	84	NearestStart
XI	219673	220102	430	sumo_peak_572 tA(AGC)K1	sumo_peak_572	+	tA(AGC)K1	219895	219967	includeFeature	-7	135	NearestStart
XI	517780	518176	397	sumo_peak_594 tA(AGC)K2	sumo_peak_594	+	tA(AGC)K2	517988	518060	includeFeature	-10	116	NearestStart
XII	656732	657161	430	sumo_peak_662 tA(AGC)L	sumo_peak_662	-	tA(AGC)L	656934	657006	includeFeature	60	155	NearestStart
XIII	321027	321315	289	sumo_peak_743 tA(AGC)M1	sumo_peak_743	-	tA(AGC)M1	321147	321219	includeFeature	48	96	NearestStart
XIII	768241	768640	400	sumo_peak_778 tA(AGC)M2	sumo_peak_778	-	tA(AGC)M2	768369	768441	includeFeature	1	128	NearestStart
XVI	856456	857147	692	sumo_peak_1000 tA(AGC)P	sumo_peak_1000	+	tA(AGC)P	856902	856974	includeFeature	-100	173	NearestStart
I	166105	166580	476	sumo_peak_8 tA(UGC)A	sumo_peak_8	+	tA(UGC)A	166267	166339	includeFeature	75	162	NearestStart		TGA1
V	311799	312265	467	sumo_peak_300 tA(UGC)E	sumo_peak_300	-	tA(UGC)E	312023	312095	includeFeature	63	170	NearestStart
VII	794241	794612	372	sumo_peak_418 tA(UGC)G	sumo_peak_418	+	tA(UGC)G	794417	794489	includeFeature	9	123	NearestStart
XII	214694	215144	451	sumo_peak_623 tA(UGC)L	sumo_peak_623	-	tA(UGC)L	214883	214955	includeFeature	36	189	NearestStart
XV	854016	854443	428	sumo_peak_912 tA(UGC)O	sumo_peak_912	-	tA(UGC)O	854187	854259	includeFeature	29	171	NearestStart
II	642894	643216	323	sumo_peak_66 tC(GCA)B	sumo_peak_66	-	tC(GCA)B	643007	643078	includeFeature	23	113	NearestStart
VII	706946	707343	398	sumo_peak_407 tC(GCA)G	sumo_peak_407	-	tC(GCA)G	707108	707179	includeFeature	35	162	NearestStart
XVI	435732	436146	415	sumo_peak_963 tC(GCA)P1	sumo_peak_963	-	tC(GCA)P1	435893	435964	includeFeature	25	161	NearestStart
XVI	775633	776005	373	sumo_peak_990 tC(GCA)P2	sumo_peak_990	-	tC(GCA)P2	775765	775836	includeFeature	17	132	NearestStart
VII	531394	531748	355	sumo_peak_391 tD(GUC)G1	sumo_peak_391	+	tD(GUC)G1	531610	531681	includeFeature	-39	67	NearestStart
VII	544415	544835	421	sumo_peak_394 tD(GUC)G2	sumo_peak_394	-	tD(GUC)G2	544577	544648	includeFeature	23	162	NearestStart
IX	324075	324566	492	sumo_peak_237 tD(GUC)I1	sumo_peak_237	-	tD(GUC)I1	324303	324374	includeFeature	54	192	NearestStart
X	204506	204996	491	sumo_peak_504 tD(GUC)J1	sumo_peak_504	+	tD(GUC)J1	204735	204806	includeFeature	16	190	NearestStart
X	374243	374790	548	sumo_peak_511 tD(GUC)J3	sumo_peak_511	-	tD(GUC)J3	374424	374495	includeFeature	-21	181	NearestStart
X	541340	541709	370	sumo_peak_533 tD(GUC)J4	sumo_peak_533	+	tD(GUC)J4	541508	541579	includeFeature	16	130	NearestStart
XI	513175	513578	404	sumo_peak_593 tD(GUC)K	sumo_peak_593	-	tD(GUC)K	513332	513403	includeFeature	27	157	NearestStart
XII	426925	427396	472	sumo_peak_638 tD(GUC)L1	sumo_peak_638	+	tD(GUC)L1	427132	427203	includeFeature	28	193	NearestStart
XII	793745	795424	1680	sumo_peak_677 tD(GUC)L2	sumo_peak_677	+	tD(GUC)L2	793918	793989	includeFeature	666	173	NearestStart
XIII	463337	463849	513	sumo_peak_750 tD(GUC)M	sumo_peak_750	+	tD(GUC)M	463554	463625	includeFeature	39	217	NearestStart
XV	571777	572131	355	sumo_peak_886 tD(GUC)O	sumo_peak_886	+	tD(GUC)O	571958	572029	includeFeature	-4	102	NearestStart
IV	1017003	1017447	445	sumo_peak_172 tE(CUC)D	sumo_peak_172	-	tE(CUC)D	1017207	1017278	includeFeature	53	169	NearestStart
IX	197432	197779	348	sumo_peak_226 tE(CUC)I	sumo_peak_226	+	tE(CUC)I	197592	197663	includeFeature	14	116	NearestStart
II	644998	645367	370	sumo_peak_67 tE(UUC)B	sumo_peak_67	+	tE(UUC)B	645167	645238	includeFeature	15	129	NearestStart
III	82369	82779	411	sumo_peak_78 tE(UUC)C	sumo_peak_78	-	tE(UUC)C	82462	82533	includeFeature	-41	93	NearestStart
V	176905	177582	678	sumo_peak_279 tE(UUC)E1	sumo_peak_279	+	tE(UUC)E1	177099	177170	includeFeature	145	194	NearestStart
V	354728	355389	662	sumo_peak_306 tE(UUC)E2	sumo_peak_306	+	tE(UUC)E2	354934	355005	includeFeature	124	206	NearestStart
V	487173	487591	419	sumo_peak_321 tE(UUC)E3	sumo_peak_321	-	tE(UUC)E3	487331	487402	includeFeature	20	158	NearestStart
VII	328420	329037	618	sumo_peak_371 tE(UUC)G1	sumo_peak_371	+	tE(UUC)G1	328583	328654	includeFeature	145	163	NearestStart		SOE1	Suppressor Of cdcEight
VII	401401	401749	349	sumo_peak_376 tE(UUC)G2	sumo_peak_376	-	tE(UUC)G2	401527	401598	includeFeature	23	126	NearestStart
VII	541624	542140	517	sumo_peak_393 tE(UUC)G3	sumo_peak_393	+	tE(UUC)G3	541850	541921	includeFeature	32	219	NearestStart
IX	370223	370644	422	sumo_peak_241 tE(UUC)I	sumo_peak_241	+	tE(UUC)I	370417	370488	includeFeature	17	156	NearestStart
X	115787	116229	443	sumo_peak_492 tE(UUC)J	sumo_peak_492	-	tE(UUC)J	115939	116010	includeFeature	2	152	NearestStart
XI	140831	141275	445	sumo_peak_562 tE(UUC)K	sumo_peak_562	-	tE(UUC)K	141018	141089	includeFeature	36	186	NearestStart
XIII	290569	291065	497	sumo_peak_741 tE(UUC)M	sumo_peak_741	+	tE(UUC)M	290801	290872	includeFeature	16	193	NearestStart
XVI	209984	210417	434	sumo_peak_945 tE(UUC)P	sumo_peak_945	-	tE(UUC)P	210192	210263	includeFeature	63	154	NearestStart
II	36206	36593	388	sumo_peak_15 tF(GAA)B	sumo_peak_15	+	tF(GAA)B	36398	36488	includeFeature	2	105	NearestStart
IV	1095195	1095646	452	sumo_peak_176 tF(GAA)D	sumo_peak_176	-	tF(GAA)D	1095370	1095461	includeFeature	41	175	NearestStart
VI	157793	158173	381	sumo_peak_336 tF(GAA)F	sumo_peak_336	-	tF(GAA)F	157916	158007	includeFeature	24	123	NearestStart
VII	440457	441009	553	sumo_peak_382 tF(GAA)G	sumo_peak_382	-	tF(GAA)G	440716	440807	includeFeature	74	202	NearestStart
VIII	237712	238096	385	sumo_peak_467 tF(GAA)H1	sumo_peak_467	-	tF(GAA)H1	237848	237939	includeFeature	35	136	NearestStart
VIII	358312	358725	414	sumo_peak_470 tF(GAA)H2	sumo_peak_470	-	tF(GAA)H2	358478	358569	includeFeature	51	156	NearestStart
XIII	352122	352533	412	sumo_peak_744 tF(GAA)M	sumo_peak_744	+	tF(GAA)M	352280	352370	includeFeature	48	158	NearestStart
XVI	560032	560479	448	sumo_peak_967 tF(GAA)P1	sumo_peak_967	-	tF(GAA)P1	560198	560289	includeFeature	33	166	NearestStart
XVI	622396	622821	426	sumo_peak_975 tF(GAA)P2	sumo_peak_975	-	tF(GAA)P2	622540	622631	includeFeature	23	144	NearestStart
IV	1256850	1257253	404	sumo_peak_191 tG(CCC)D	sumo_peak_191	-	tG(CCC)D	1257008	1257079	includeFeature	27	158	NearestStart		SUF3	SUppression of Frameshift mutation
XV	594204	594644	441	sumo_peak_889 tG(CCC)O	sumo_peak_889	-	tG(CCC)O	594354	594425	includeFeature	1	150	NearestStart		SUF5
III	142601	142922	322	sumo_peak_86 tG(GCC)C	sumo_peak_86	-	tG(GCC)C	142701	142771	includeFeature	9	100	NearestStart		SUF16	SUppression of Frameshift mutation
IV	83371	83810	440	sumo_peak_99 tG(GCC)D1	sumo_peak_99	+	tG(GCC)D1	83548	83618	includeFeature	42	177	NearestStart
IV	992615	993054	440	sumo_peak_169 tG(GCC)D2	sumo_peak_169	+	tG(GCC)D2	992832	992902	includeFeature	2	152	NearestStart
VI	162047	162400	354	sumo_peak_337 tG(GCC)F1	sumo_peak_337	+	tG(GCC)F1	162228	162298	includeFeature	-4	102	NearestStart		SUF20
VII	845461	845971	511	sumo_peak_425 tG(GCC)G1	sumo_peak_425	+	tG(GCC)G1	845649	845719	includeFeature	67	188	NearestStart
VII	930825	931196	372	sumo_peak_436 tG(GCC)G2	sumo_peak_436	-	tG(GCC)G2	930953	931023	includeFeature	13	128	NearestStart
X	396607	396967	361	sumo_peak_514 tG(GCC)J1	sumo_peak_514	-	tG(GCC)J1	396726	396796	includeFeature	9	119	NearestStart
X	531645	532211	567	sumo_peak_531 tG(GCC)J2	sumo_peak_531	+	tG(GCC)J2	531828	531898	includeFeature	100	183	NearestStart		SUF23
XIII	183800	184176	377	sumo_peak_730 tG(GCC)M	sumo_peak_730	-	tG(GCC)M	183898	183968	includeFeature	-20	98	NearestStart
XV	226486	226841	356	sumo_peak_864 tG(GCC)O1	sumo_peak_864	-	tG(GCC)O1	226611	226681	includeFeature	17	125	NearestStart
XV	282002	282407	406	sumo_peak_870 tG(GCC)O2	sumo_peak_870	+	tG(GCC)O2	282164	282234	includeFeature	40	162	NearestStart		SUF17
XVI	572061	572641	581	sumo_peak_968 tG(GCC)P1	sumo_peak_968	+	tG(GCC)P1	572269	572339	includeFeature	82	208	NearestStart
XVI	860202	860683	482	sumo_peak_1001 tG(GCC)P2	sumo_peak_1001	+	tG(GCC)P2	860379	860449	includeFeature	63	177	NearestStart
VII	779437	779876	440	sumo_peak_414 tG(UCC)G	sumo_peak_414	+	tG(UCC)G	779616	779687	includeFeature	40	179	NearestStart		SUF4
XV	110842	111236	395	sumo_peak_860 tG(UCC)O	sumo_peak_860	-	tG(UCC)O	110962	111033	includeFeature	-6	120	NearestStart		SUF1
V	207162	207591	430	sumo_peak_280 tH(GUG)E1	sumo_peak_280	+	tH(GUG)E1	207357	207428	includeFeature	19	163	NearestStart
V	434406	435005	600	sumo_peak_314 tH(GUG)E2	sumo_peak_314	-	tH(GUG)E2	434541	434612	includeFeature	-94	135	NearestStart
VII	110483	110870	388	sumo_peak_354 tH(GUG)G1	sumo_peak_354	-	tH(GUG)G1	110625	110696	includeFeature	20	142	NearestStart
VII	319610	320077	468	sumo_peak_370 tH(GUG)G2	sumo_peak_370	+	tH(GUG)G2	319781	319852	includeFeature	63	171	NearestStart
VIII	62597	62902	306	sumo_peak_448 tH(GUG)H	sumo_peak_448	+	tH(GUG)H	62755	62826	includeFeature	-5	76	NearestStart
XI	313212	313636	425	sumo_peak_579 tH(GUG)K	sumo_peak_579	-	tH(GUG)K	313401	313472	includeFeature	48	164	NearestStart
XIII	362870	363285	416	sumo_peak_745 tH(GUG)M	sumo_peak_745	+	tH(GUG)M	363064	363135	includeFeature	14	150	NearestStart
II	197339	197870	532	sumo_peak_28 tI(AAU)B	sumo_peak_28	+	tI(AAU)B	197494	197567	includeFeature	110	155	NearestStart
IV	667830	668271	442	sumo_peak_157 tI(AAU)D	sumo_peak_157	-	tI(AAU)D	668007	668080	includeFeature	30	177	NearestStart
V	443090	443450	361	sumo_peak_318 tI(AAU)E1	sumo_peak_318	-	tI(AAU)E1	443202	443275	includeFeature	5	112	NearestStart
V	551156	551522	367	sumo_peak_324 tI(AAU)E2	sumo_peak_324	-	tI(AAU)E2	551285	551358	includeFeature	19	129	NearestStart
VII	738945	739584	640	sumo_peak_412 tI(AAU)G	sumo_peak_412	+	tI(AAU)G	739122	739195	includeFeature	142	177	NearestStart
IX	183321	183660	340	sumo_peak_225 tI(AAU)I1	sumo_peak_225	-	tI(AAU)I1	183440	183513	includeFeature	23	119	NearestStart
IX	210499	210943	445	sumo_peak_227 tI(AAU)I2	sumo_peak_227	+	tI(AAU)I2	210665	210738	includeFeature	56	166	NearestStart
XII	734633	735003	371	sumo_peak_673 tI(AAU)L1	sumo_peak_673	+	tI(AAU)L1	734802	734875	includeFeature	16	128	NearestStart
XII	1051945	1052329	385	sumo_peak_711 tI(AAU)L2	sumo_peak_711	-	tI(AAU)L2	1052071	1052144	includeFeature	7	126	NearestStart
XIV	569699	570109	411	sumo_peak_827 tI(AAU)N1	sumo_peak_827	-	tI(AAU)N1	569867	569940	includeFeature	36	168	NearestStart
XIV	602157	602550	394	sumo_peak_832 tI(AAU)N2	sumo_peak_832	+	tI(AAU)N2	602312	602385	includeFeature	42	155	NearestStart
XVI	819349	819807	459	sumo_peak_996 tI(AAU)P1	sumo_peak_996	+	tI(AAU)P1	819529	819602	includeFeature	49	180	NearestStart
XVI	880119	880548	430	sumo_peak_1002 tI(AAU)P2	sumo_peak_1002	-	tI(AAU)P2	880296	880369	includeFeature	35	177	NearestStart
IV	884231	884664	434	sumo_peak_160 tI(UAU)D	sumo_peak_160	+	tI(UAU)D	884361	884493	includeFeature	87	130	NearestStart
XII	605099	605585	487	sumo_peak_657 tI(UAU)L	sumo_peak_657	-	tI(UAU)L	605300	605432	includeFeature	90	153	NearestStart
IV	1201562	1202045	484	sumo_peak_184 tK(CUU)D1	sumo_peak_184	+	tK(CUU)D1	1201750	1201822	includeFeature	54	188	NearestStart
IV	1352250	1352712	463	sumo_peak_197 tK(CUU)D2	sumo_peak_197	-	tK(CUU)D2	1352466	1352538	includeFeature	57	174	NearestStart
V	135206	135648	443	sumo_peak_272 tK(CUU)E1	sumo_peak_272	-	tK(CUU)E1	135425	135497	includeFeature	70	151	NearestStart
V	435600	435968	369	sumo_peak_315 tK(CUU)E2	sumo_peak_315	-	tK(CUU)E2	435752	435824	includeFeature	40	144	NearestStart
VI	226525	226911	387	sumo_peak_347 tK(CUU)F	sumo_peak_347	-	tK(CUU)F	226688	226760	includeFeature	42	151	NearestStart
VII	122067	122529	463	sumo_peak_356 tK(CUU)G1	sumo_peak_356	+	tK(CUU)G1	122269	122341	includeFeature	29	188	NearestStart
VII	185566	185949	384	sumo_peak_360 tK(CUU)G2	sumo_peak_360	-	tK(CUU)G2	185714	185786	includeFeature	28	148	NearestStart
VII	876228	876654	427	sumo_peak_429 tK(CUU)G3	sumo_peak_429	+	tK(CUU)G3	876394	876466	includeFeature	47	166	NearestStart
IX	300050	300459	410	sumo_peak_234 tK(CUU)I	sumo_peak_234	-	tK(CUU)I	300228	300300	includeFeature	46	159	NearestStart
X	414780	415204	425	sumo_peak_515 tK(CUU)J	sumo_peak_515	+	tK(CUU)J	414966	415038	includeFeature	26	166	NearestStart
XI	202808	203270	463	sumo_peak_569 tK(CUU)K	sumo_peak_569	+	tK(CUU)K	202999	203071	includeFeature	40	191	NearestStart
XIII	480434	480850	417	sumo_peak_751 tK(CUU)M	sumo_peak_751	-	tK(CUU)M	480621	480693	includeFeature	51	157	NearestStart
XVI	581856	582320	465	sumo_peak_973 tK(CUU)P	sumo_peak_973	+	tK(CUU)P	582062	582134	includeFeature	26	186	NearestStart
IV	359387	359835	449	sumo_peak_126 tK(UUU)D	sumo_peak_126	+	tK(UUU)D	359577	359672	includeFeature	34	163	NearestStart
VII	115310	115778	469	sumo_peak_355 tK(UUU)G1	sumo_peak_355	+	tK(UUU)G1	115488	115583	includeFeature	56	178	NearestStart
XI	578769	579283	515	sumo_peak_600 tK(UUU)K	sumo_peak_600	+	tK(UUU)K	578965	579060	includeFeature	61	196	NearestStart
XII	875208	875622	415	sumo_peak_691 tK(UUU)L	sumo_peak_691	+	tK(UUU)L	875376	875471	includeFeature	39	151	NearestStart
XV	438472	439008	537	sumo_peak_878 tK(UUU)O	sumo_peak_878	+	tK(UUU)O	438643	438738	includeFeature	97	171	NearestStart
XVI	769027	769480	454	sumo_peak_989 tK(UUU)P	sumo_peak_989	-	tK(UUU)P	769207	769302	includeFeature	48	178	NearestStart
I	180968	181400	433	sumo_peak_9 tL(CAA)A	sumo_peak_9	+	tL(CAA)A	181141	181254	includeFeature	43	146	NearestStart		SUP56	SUPpressor
III	90687	91088	402	sumo_peak_79 tL(CAA)C	sumo_peak_79	+	tL(CAA)C	90859	90972	includeFeature	29	116	NearestStart		SUP53	SUPpressor
VII	205364	205793	430	sumo_peak_361 tL(CAA)G1	sumo_peak_361	+	tL(CAA)G1	205521	205634	includeFeature	57	157	NearestStart
VII	422908	423340	433	sumo_peak_379 tL(CAA)G2	sumo_peak_379	+	tL(CAA)G2	423092	423205	includeFeature	32	135	NearestStart		SUP54
VII	857201	857634	434	sumo_peak_426 tL(CAA)G3	sumo_peak_426	-	tL(CAA)G3	857378	857491	includeFeature	73	143	NearestStart
XI	458423	458882	460	sumo_peak_591 tL(CAA)K	sumo_peak_591	+	tL(CAA)K	458557	458670	includeFeature	95	134	NearestStart
XII	628149	628598	450	sumo_peak_658 tL(CAA)L	sumo_peak_658	+	tL(CAA)L	628383	628497	includeFeature	-9	101	NearestStart
XIII	504726	505177	452	sumo_peak_754 tL(CAA)M	sumo_peak_754	+	tL(CAA)M	504895	505008	includeFeature	57	169	NearestStart
XIV	442828	444004	1177	sumo_peak_815 tL(CAA)N	sumo_peak_815	+	tL(CAA)N	443006	443119	includeFeature	410	178	NearestStart
VII	700468	701215	748	sumo_peak_406 tL(GAG)G	sumo_peak_406	+	tL(GAG)G	700675	700756	includeFeature	167	207	NearestStart
II	9386	9875	490	sumo_peak_14 tL(UAA)B1	sumo_peak_14	+	tL(UAA)B1	9583	9666	includeFeature	47	197	NearestStart
II	347442	347828	387	sumo_peak_43 tL(UAA)B2	sumo_peak_43	+	tL(UAA)B2	347603	347686	includeFeature	32	142	NearestStart
IV	519575	519939	365	sumo_peak_145 tL(UAA)D	sumo_peak_145	+	tL(UAA)D	519743	519826	includeFeature	14	113	NearestStart
X	424289	424713	425	sumo_peak_518 tL(UAA)J	sumo_peak_518	-	tL(UAA)J	424432	424515	includeFeature	14	143	NearestStart		SUP51
XI	84024	84386	363	sumo_peak_553 tL(UAA)K	sumo_peak_553	+	tL(UAA)K	84208	84291	includeFeature	-3	95	NearestStart
XII	962859	963257	399	sumo_peak_703 tL(UAA)L	sumo_peak_703	-	tL(UAA)L	962972	963055	includeFeature	-3	113	NearestStart
XIV	726013	726415	403	sumo_peak_845 tL(UAA)N	sumo_peak_845	-	tL(UAA)N	726134	726217	includeFeature	3	121	NearestStart
X	617747	618132	386	sumo_peak_537 tL(UAG)J	sumo_peak_537	+	tL(UAG)J	617919	618019	includeFeature	21	113	NearestStart
XII	592361	592811	451	sumo_peak_656 tL(UAG)L1	sumo_peak_656	-	tL(UAG)L1	592519	592619	includeFeature	33	158	NearestStart
XII	731909	732339	431	sumo_peak_672 tL(UAG)L2	sumo_peak_672	+	tL(UAG)L2	732090	732190	includeFeature	34	149	NearestStart
IV	1175656	1176044	389	sumo_peak_183 tM(CAU)D	sumo_peak_183	+	tM(CAU)D	1175829	1175901	includeFeature	21	143	NearestStart		EMT1	Elongator MeThionine-accepting tRNA
V	99928	100313	386	sumo_peak_264 tM(CAU)E	sumo_peak_264	+	tM(CAU)E	100133	100204	includeFeature	-13	109	NearestStart		IMT4	Initiator Methionine tRNA
X	390907	391328	422	sumo_peak_513 tM(CAU)J1	sumo_peak_513	-	tM(CAU)J1	391043	391115	includeFeature	-3	136	NearestStart		EMT5	Elongator MeThionine-accepting tRNA
X	422777	423207	431	sumo_peak_517 tM(CAU)J2	sumo_peak_517	+	tM(CAU)J2	422937	423009	includeFeature	55	160	NearestStart		EMT3	Elongator MeThionine-accepting tRNA
X	517679	518065	387	sumo_peak_527 tM(CAU)J3	sumo_peak_527	-	tM(CAU)J3	517813	517884	includeFeature	12	134	NearestStart		IMT3	Initiator Methionine tRNA
XIII	572774	573132	359	sumo_peak_762 tM(CAU)M	sumo_peak_762	-	tM(CAU)M	572883	572955	includeFeature	2	109	NearestStart		EMT4	Elongator MeThionine-accepting tRNA
XV	709996	710381	386	sumo_peak_897 tM(CAU)O1	sumo_peak_897	+	tM(CAU)O1	710201	710272	includeFeature	-13	109	NearestStart		IMT1	Initiator Methionine tRNA
XV	976209	976732	524	sumo_peak_923 tM(CAU)O2	sumo_peak_923	+	tM(CAU)O2	976421	976493	includeFeature	49	212	NearestStart		EMT2	Elongator MeThionine-accepting tRNA
XVI	338736	339113	378	sumo_peak_954 tM(CAU)P	sumo_peak_954	-	tM(CAU)P	338848	338919	includeFeature	-5	112	NearestStart		IMT2	Initiator Methionine tRNA
III	127537	127888	352	sumo_peak_83 tN(GUU)C	sumo_peak_83	+	tN(GUU)C	127716	127789	includeFeature	-4	99	NearestStart
VI	137290	137752	463	sumo_peak_334 tN(GUU)F	sumo_peak_334	-	tN(GUU)F	137486	137559	includeFeature	38	193	NearestStart
VII	730980	731397	418	sumo_peak_410 tN(GUU)G	sumo_peak_410	+	tN(GUU)G	731137	731210	includeFeature	51	157	NearestStart
XI	74469	74866	398	sumo_peak_552 tN(GUU)K	sumo_peak_552	+	tN(GUU)K	74624	74697	includeFeature	44	155	NearestStart
XII	975814	976247	434	sumo_peak_704 tN(GUU)L	sumo_peak_704	-	tN(GUU)L	975983	976056	includeFeature	26	169	NearestStart
XIV	102524	102909	386	sumo_peak_798 tN(GUU)N1	sumo_peak_798	+	tN(GUU)N1	102716	102789	includeFeature	0	120	NearestStart
XIV	632432	632875	444	sumo_peak_836 tN(GUU)N2	sumo_peak_836	+	tN(GUU)N2	632599	632672	includeFeature	55	167	NearestStart
XV	228150	228542	393	sumo_peak_865 tN(GUU)O1	sumo_peak_865	+	tN(GUU)O1	228331	228404	includeFeature	15	138	NearestStart
XV	487269	487640	372	sumo_peak_881 tN(GUU)O2	sumo_peak_881	+	tN(GUU)O2	487439	487512	includeFeature	15	128	NearestStart
XVI	810488	810890	403	sumo_peak_995 tN(GUU)P	sumo_peak_995	+	tN(GUU)P	810676	810749	includeFeature	13	141	NearestStart
III	123411	123848	438	sumo_peak_82 tP(AGG)C	sumo_peak_82	-	tP(AGG)C	123577	123648	includeFeature	18	166	NearestStart		SUF2	SUppression of Frameshift mutation
XIV	631736	632092	357	sumo_peak_835 tP(AGG)N	sumo_peak_835	-	tP(AGG)N	631846	631917	includeFeature	3	110	NearestStart		SUF10
I	139002	139312	311	sumo_peak_5 tP(UGG)A	sumo_peak_5	+	tP(UGG)A	139152	139254	includeFeature	5	58	NearestStart		TRN1	TRNA
VI	101177	101613	437	sumo_peak_333 tP(UGG)F	sumo_peak_333	+	tP(UGG)F	101376	101478	includeFeature	19	135	NearestStart		SUF9
VIII	388727	389189	463	sumo_peak_473 tP(UGG)H	sumo_peak_473	-	tP(UGG)H	388893	388995	includeFeature	37	166	NearestStart		SUF8
XII	92397	92843	447	sumo_peak_613 tP(UGG)L	sumo_peak_613	+	tP(UGG)L	92548	92650	includeFeature	72	151	NearestStart
XIII	195966	196378	413	sumo_peak_731 tP(UGG)M	sumo_peak_731	-	tP(UGG)M	196068	196170	includeFeature	-2	102	NearestStart		SUF7
XIV	546930	547397	468	sumo_peak_824 tP(UGG)N1	sumo_peak_824	+	tP(UGG)N1	547094	547196	includeFeature	70	164	NearestStart
XIV	567923	568408	486	sumo_peak_826 tP(UGG)N2	sumo_peak_826	+	tP(UGG)N2	568115	568217	includeFeature	51	191	NearestStart
XV	464283	464720	438	sumo_peak_880 tP(UGG)O2	sumo_peak_880	+	tP(UGG)O2	464450	464551	includeFeature	52	167	NearestStart		SUF11
XV	980492	980987	496	sumo_peak_926 tP(UGG)O3	sumo_peak_926	+	tP(UGG)O3	980683	980787	includeFeature	57	191	NearestStart
XIII	808093	808492	400	sumo_peak_779 tQ(CUG)M	sumo_peak_779	-	tQ(CUG)M	808246	808317	includeFeature	25	153	NearestStart		CDC65	Cell Division Cycle
II	350654	351041	388	sumo_peak_44 tQ(UUG)B	sumo_peak_44	+	tQ(UUG)B	350827	350898	includeFeature	21	143	NearestStart
III	168197	168607	411	sumo_peak_88 tQ(UUG)C	sumo_peak_88	-	tQ(UUG)C	168301	168372	includeFeature	-30	104	NearestStart
IV	520784	521145	362	sumo_peak_146 tQ(UUG)D1	sumo_peak_146	+	tQ(UUG)D1	520972	521043	includeFeature	-8	102	NearestStart
IV	802579	802945	367	sumo_peak_159 tQ(UUG)D3	sumo_peak_159	-	tQ(UUG)D3	802731	802802	includeFeature	40	143	NearestStart
V	250105	250560	456	sumo_peak_284 tQ(UUG)E1	sumo_peak_284	+	tQ(UUG)E1	250286	250357	includeFeature	46	181	NearestStart
V	130925	131337	413	sumo_peak_271 tQ(UUG)E2	sumo_peak_271	-	tQ(UUG)E2	131082	131153	includeFeature	22	157	NearestStart
VIII	134129	134550	422	sumo_peak_461 tQ(UUG)H	sumo_peak_461	+	tQ(UUG)H	134321	134392	includeFeature	19	158	NearestStart
XII	448498	448886	389	sumo_peak_640 tQ(UUG)L	sumo_peak_640	-	tQ(UUG)L	448650	448721	includeFeature	29	152	NearestStart
IV	619790	620238	449	sumo_peak_155 tR(ACG)D	sumo_peak_155	-	tR(ACG)D	619969	620041	includeFeature	27	179	NearestStart
V	492196	492989	794	sumo_peak_322 tR(ACG)E	sumo_peak_322	-	tR(ACG)E	492352	492424	includeFeature	-168	156	NearestStart
X	233705	234184	480	sumo_peak_506 tR(ACG)J	sumo_peak_506	+	tR(ACG)J	233939	234011	includeFeature	5	173	NearestStart
XI	490771	491178	408	sumo_peak_592 tR(ACG)K	sumo_peak_592	+	tR(ACG)K	490968	491040	includeFeature	6	138	NearestStart
XII	374190	374618	429	sumo_peak_637 tR(ACG)L	sumo_peak_637	+	tR(ACG)L	374355	374427	includeFeature	49	165	NearestStart
XV	340130	340542	413	sumo_peak_875 tR(ACG)O	sumo_peak_875	-	tR(ACG)O	340299	340371	includeFeature	35	169	NearestStart
XII	818443	820524	2082	sumo_peak_688 tR(CCG)L	sumo_peak_688	+	tR(CCG)L	818609	818680	includeFeature	875	166	NearestStart		TRR4	TRna aRg 4
X	538390	538718	329	sumo_peak_532 tR(CCU)J	sumo_peak_532	+	tR(CCU)J	538555	538626	includeFeature	-1	92	NearestStart		HSX1
II	405723	406184	462	sumo_peak_52 tR(UCU)B	sumo_peak_52	+	tR(UCU)B	405878	405949	includeFeature	76	155	NearestStart
V	138518	139993	1476	sumo_peak_273 tR(UCU)E	sumo_peak_273	+	tR(UCU)E	138666	138737	includeFeature	590	148	NearestStart
VII	405279	405726	448	sumo_peak_377 tR(UCU)G1	sumo_peak_377	+	tR(UCU)G1	405470	405541	includeFeature	32	185	NearestStart
VII	736178	736539	362	sumo_peak_411 tR(UCU)G3	sumo_peak_411	+	tR(UCU)G3	736340	736411	includeFeature	18	128	NearestStart
X	355174	355724	551	sumo_peak_510 tR(UCU)J1	sumo_peak_510	+	tR(UCU)J1	355374	355445	includeFeature	75	200	NearestStart
XI	162348	162709	362	sumo_peak_566 tR(UCU)K	sumo_peak_566	-	tR(UCU)K	162487	162558	includeFeature	30	139	NearestStart
XIII	747760	748129	370	sumo_peak_773 tR(UCU)M1	sumo_peak_773	-	tR(UCU)M1	747892	747963	includeFeature	19	132	NearestStart
XIII	131635	132042	408	sumo_peak_721 tR(UCU)M2	sumo_peak_721	-	tR(UCU)M2	131825	131896	includeFeature	58	146	NearestStart
I	182383	182772	390	sumo_peak_10 tS(AGA)A	sumo_peak_10	-	tS(AGA)A	182522	182603	includeFeature	25	139	NearestStart
II	226900	227381	482	sumo_peak_29 tS(AGA)B	sumo_peak_29	+	tS(AGA)B	227075	227156	includeFeature	65	175	NearestStart
IV	437610	438000	391	sumo_peak_132 tS(AGA)D1	sumo_peak_132	+	tS(AGA)D1	437772	437853	includeFeature	33	147	NearestStart
IV	980728	981221	494	sumo_peak_167 tS(AGA)D2	sumo_peak_167	-	tS(AGA)D2	980974	981055	includeFeature	81	166	NearestStart
IV	1305447	1305871	425	sumo_peak_195 tS(AGA)D3	sumo_peak_195	+	tS(AGA)D3	1305630	1305712	includeFeature	29	159	NearestStart
VII	561456	561902	447	sumo_peak_398 tS(AGA)G	sumo_peak_398	-	tS(AGA)G	561662	561743	includeFeature	64	159	NearestStart
VIII	132899	133265	367	sumo_peak_460 tS(AGA)H	sumo_peak_460	-	tS(AGA)H	133026	133107	includeFeature	25	127	NearestStart
X	523850	524278	429	sumo_peak_530 tS(AGA)J	sumo_peak_530	-	tS(AGA)J	524012	524093	includeFeature	29	162	NearestStart
XIII	259038	259430	393	sumo_peak_737 tS(AGA)M	sumo_peak_737	-	tS(AGA)M	259158	259239	includeFeature	5	120	NearestStart
III	227783	228237	455	sumo_peak_92 tS(CGA)C	sumo_peak_92	+	tS(CGA)C	227942	228042	includeFeature	68	159	NearestStart		SUP61	SUPpressor
VI	191377	191765	389	sumo_peak_340 tS(GCU)F	sumo_peak_340	-	tS(GCU)F	191513	191613	includeFeature	42	136	NearestStart
XII	784159	784530	372	sumo_peak_676 tS(GCU)L	sumo_peak_676	+	tS(GCU)L	784354	784453	includeFeature	-10	77	NearestStart
XV	274486	274944	459	sumo_peak_869 tS(GCU)O	sumo_peak_869	+	tS(GCU)O	274673	274773	includeFeature	42	171	NearestStart
V	288272	288727	456	sumo_peak_292 tS(UGA)E	sumo_peak_292	-	tS(UGA)E	288443	288524	includeFeature	24	171	NearestStart		SUP19
IX	248657	249096	440	sumo_peak_231 tS(UGA)I	sumo_peak_231	+	tS(UGA)I	248850	248931	includeFeature	26	165	NearestStart		SUP17
XVI	689401	689867	467	sumo_peak_979 tS(UGA)P	sumo_peak_979	+	tS(UGA)P	689565	689646	includeFeature	69	164	NearestStart		SUP16
II	266217	266648	432	sumo_peak_37 tT(AGU)B	sumo_peak_37	+	tT(AGU)B	266378	266450	includeFeature	54	161	NearestStart
III	295308	295809	502	sumo_peak_94 tT(AGU)C	sumo_peak_94	+	tT(AGU)C	295484	295556	includeFeature	74	176	NearestStart
IV	434063	434487	425	sumo_peak_131 tT(AGU)D	sumo_peak_131	-	tT(AGU)D	434264	434336	includeFeature	61	151	NearestStart
IX	325581	325990	410	sumo_peak_238 tT(AGU)I2	sumo_peak_238	+	tT(AGU)I2	325748	325820	includeFeature	38	167	NearestStart
X	59015	59336	322	sumo_peak_487 tT(AGU)J	sumo_peak_487	-	tT(AGU)J	59100	59172	includeFeature	-4	85	NearestStart
XIV	104637	105039	403	sumo_peak_799 tT(AGU)N1	sumo_peak_799	+	tT(AGU)N1	104805	104877	includeFeature	33	162	NearestStart
XIV	560585	560961	377	sumo_peak_825 tT(AGU)N2	sumo_peak_825	-	tT(AGU)N2	560693	560765	includeFeature	-8	108	NearestStart
XV	113609	113961	353	sumo_peak_861 tT(AGU)O1	sumo_peak_861	+	tT(AGU)O1	113802	113874	includeFeature	-17	87	NearestStart
XV	353910	354268	359	sumo_peak_876 tT(AGU)O2	sumo_peak_876	-	tT(AGU)O2	354041	354113	includeFeature	24	131	NearestStart
XI	46676	46981	306	sumo_peak_551 tT(CGU)K	sumo_peak_551	-	tT(CGU)K	46735	46806	includeFeature	-22	59	NearestStart		TRT2	TRna thR 2
VII	661560	661942	383	sumo_peak_404 tT(UGU)G1	sumo_peak_404	+	tT(UGU)G1	661749	661820	includeFeature	2	122	NearestStart
VII	1004038	1004376	339	sumo_peak_439 tT(UGU)G2	sumo_peak_439	+	tT(UGU)G2	1004216	1004287	includeFeature	-9	89	NearestStart
V	438519	438900	382	sumo_peak_316 tV(AAC)E1	sumo_peak_316	+	tV(AAC)E1	438700	438773	includeFeature	10	127	NearestStart
V	469292	469648	357	sumo_peak_320 tV(AAC)E2	sumo_peak_320	+	tV(AAC)E2	469457	469530	includeFeature	13	118	NearestStart
VII	412110	412513	404	sumo_peak_378 tV(AAC)G1	sumo_peak_378	-	tV(AAC)G1	412294	412367	includeFeature	55	146	NearestStart
VII	823294	823693	400	sumo_peak_421 tV(AAC)G2	sumo_peak_421	+	tV(AAC)G2	823482	823555	includeFeature	12	138	NearestStart
VII	73717	74153	437	sumo_peak_352 tV(AAC)G3	sumo_peak_352	-	tV(AAC)G3	73829	73902	includeFeature	-33	112	NearestStart
VIII	85191	85552	362	sumo_peak_450 tV(AAC)H	sumo_peak_450	-	tV(AAC)H	85298	85371	includeFeature	-1	107	NearestStart
X	378195	378591	397	sumo_peak_512 tV(AAC)J	sumo_peak_512	+	tV(AAC)J	378360	378433	includeFeature	33	158	NearestStart
XI	307983	308404	422	sumo_peak_578 tV(AAC)K1	sumo_peak_578	-	tV(AAC)K1	308144	308217	includeFeature	23	161	NearestStart
XI	379493	379892	400	sumo_peak_583 tV(AAC)K2	sumo_peak_583	+	tV(AAC)K2	379680	379753	includeFeature	12	139	NearestStart
XII	687717	688103	387	sumo_peak_665 tV(AAC)L	sumo_peak_665	-	tV(AAC)L	687859	687932	includeFeature	22	142	NearestStart
XIII	372271	372713	443	sumo_peak_746 tV(AAC)M1	sumo_peak_746	-	tV(AAC)M1	372445	372518	includeFeature	26	174	NearestStart
XIII	420441	420833	393	sumo_peak_749 tV(AAC)M2	sumo_peak_749	-	tV(AAC)M2	420588	420661	includeFeature	24	147	NearestStart
XIII	586496	586863	368	sumo_peak_763 tV(AAC)M3	sumo_peak_763	-	tV(AAC)M3	586636	586709	includeFeature	29	140	NearestStart
XV	663525	664042	518	sumo_peak_895 tV(AAC)O	sumo_peak_895	-	tV(AAC)O	663812	663885	includeFeature	101	157	NearestStart
IV	1075302	1075731	430	sumo_peak_173 tV(CAC)D	sumo_peak_173	-	tV(CAC)D	1075472	1075544	includeFeature	28	170	NearestStart
VIII	475508	475906	399	sumo_peak_477 tV(CAC)H	sumo_peak_477	-	tV(CAC)H	475706	475778	includeFeature	71	128	NearestStart
II	326626	327031	406	sumo_peak_40 tV(UAC)B	sumo_peak_40	-	tV(UAC)B	326792	326865	includeFeature	37	166	NearestStart
VII	287129	287594	466	sumo_peak_367 tW(CCA)G1	sumo_peak_367	-	tW(CCA)G1	287350	287455	includeFeature	93	139	NearestStart
VII	878627	878996	370	sumo_peak_430 tW(CCA)G2	sumo_peak_430	-	tW(CCA)G2	878710	878815	includeFeature	3	83	NearestStart
X	415783	416211	429	sumo_peak_516 tW(CCA)J	sumo_peak_516	-	tW(CCA)J	415931	416036	includeFeature	39	148	NearestStart
XI	302771	303170	400	sumo_peak_577 tW(CCA)K	sumo_peak_577	+	tW(CCA)K	302918	303023	includeFeature	52	147	NearestStart
XIII	379215	379586	372	sumo_peak_747 tW(CCA)M	sumo_peak_747	-	tW(CCA)M	379303	379408	includeFeature	8	88	NearestStart
XVI	55887	56463	577	sumo_peak_933 tW(CCA)P	sumo_peak_933	-	tW(CCA)P	56169	56274	includeFeature	99	189	NearestStart
IV	946126	946577	452	sumo_peak_166 tY(GUA)D	sumo_peak_166	+	tY(GUA)D	946312	946400	includeFeature	40	177	NearestStart		SUP2
VI	210484	210885	402	sumo_peak_342 tY(GUA)F2	sumo_peak_342	-	tY(GUA)F2	210619	210707	includeFeature	23	135	NearestStart		SUP6
X	354069	354480	412	sumo_peak_509 tY(GUA)J1	sumo_peak_509	+	tY(GUA)J1	354244	354332	includeFeature	30	148	NearestStart		SUP7
X	542822	543255	434	sumo_peak_534 tY(GUA)J2	sumo_peak_534	-	tY(GUA)J2	542956	543044	includeFeature	6	134	NearestStart		SUP4
XIII	168630	169038	409	sumo_peak_729 tY(GUA)M1	sumo_peak_729	+	tY(GUA)M1	168795	168883	includeFeature	39	155	NearestStart		SUP5
XIII	837762	838141	380	sumo_peak_780 tY(GUA)M2	sumo_peak_780	+	tY(GUA)M2	837928	838016	includeFeature	24	125	NearestStart		SUP8
XV	287986	288433	448	sumo_peak_871 tY(GUA)O	sumo_peak_871	+	tY(GUA)O	288192	288280	includeFeature	18	153	NearestStart		SUP3
I	151531	151803	273	sumo_peak_7 YAL001C	sumo_peak_7	-	YAL001C	147594	151166	upstream	-501	365	NearestStart		TFC3	Transcription Factor class C
I	142056	143647	1592	sumo_peak_6 YAL003W	sumo_peak_6	+	YAL003W	142174	143160	includeFeature	678	118	NearestStart		EFB1	Elongation Factor Beta
I	73424	73639	216	sumo_peak_4 YAL037C-A	sumo_peak_4	-	YAL037C-A	73426	73518	includeFeature	-14	2	NearestStart
I	229839	230184	346	sumo_peak_12 YAR075W	sumo_peak_12	+	YAR075W	228844	229317	downstream	1168	522	NearestStart
II	237898	238622	725	sumo_peak_33 YBL001C	sumo_peak_33	-	YBL001C	237153	237467	upstream	-793	431	NearestStart		ECM15	ExtraCellular Mutant
II	234650	236086	1437	sumo_peak_30 YBL003C	sumo_peak_30	-	YBL003C	235394	235792	includeFeature	424	294	NearestStart		HTA2	Histone h Two A
II	167868	168454	587	sumo_peak_26 YBL027W	sumo_peak_26	+	YBL027W	168423	169376	overlapStart	-262	31	NearestStart		RPL19B	Ribosomal Protein of the Large subunit
II	168647	169680	1034	sumo_peak_27 YBL027W	sumo_peak_27	+	YBL027W	168423	169376	overlapEnd	741	224	NearestStart
II	162968	163815	848	sumo_peak_25 YBL030C	sumo_peak_25	-	YBL030C	163041	163997	overlapEnd	605	73	NearestStart		PET9	PETite colonies
II	89335	89961	627	sumo_peak_23 YBL071C-B	sumo_peak_23	-	YBL071C-B	89458	89556	includeFeature	-92	123	NearestStart
II	59856	60404	549	sumo_peak_19 YBL087C	sumo_peak_19	-	YBL087C	59822	60739	inside	609	34	NearestStart		RPL23A	Ribosomal Protein of the Large subunit
II	60669	61232	564	sumo_peak_20 YBL087C	sumo_peak_20	-	YBL087C	59822	60739	overlapStart	-211	70	NearestStart
II	45577	46757	1181	sumo_peak_18 YBL092W	sumo_peak_18	+	YBL092W	45978	46370	includeFeature	189	387	NearestStart		RPL32	Ribosomal Protein of the Large subunit
II	45005	45362	358	sumo_peak_17 YBL093C	sumo_peak_17	-	YBL093C	44256	44918	upstream	-266	87	NearestStart		ROX3	Repressor Of hypoXic genes
II	255343	255849	507	sumo_peak_34 YBR009C	sumo_peak_34	-	YBR009C	255373	255684	includeFeature	88	30	NearestStart		HHF1	Histone H Four
II	256895	257247	353	sumo_peak_36 YBR010W	sumo_peak_36	+	YBR010W	256331	256741	downstream	740	154	NearestStart		HHT1	Histone H Three
II	278454	278781	328	sumo_peak_38 YBR019C	sumo_peak_38	-	YBR019C	276253	278352	upstream	-266	102	NearestStart		GAL10	GALactose metabolism
II	300092	301620	1529	sumo_peak_39 YBR031W	sumo_peak_39	+	YBR031W	300166	301254	includeFeature	690	74	NearestStart		RPL4A	Ribosomal Protein of the Large subunit
II	332344	332898	555	sumo_peak_41 YBR048W	sumo_peak_41	+	YBR048W	332831	333812	overlapStart	-210	67	NearestStart		RPS11B	Ribosomal Protein of the Small subunit
II	333081	334253	1173	sumo_peak_42 YBR048W	sumo_peak_42	+	YBR048W	332831	333812	overlapEnd	836	250	NearestStart
II	373415	375886	2472	sumo_peak_45 YBR068C	sumo_peak_45	-	YBR068C	373861	375690	includeFeature	1040	196	NearestStart		BAP2	Branched-chain Amino acid Permease
II	376605	377514	910	sumo_peak_46 YBR068C	sumo_peak_46	-	YBR068C	373861	375690	upstream	-1370	915	NearestStart		ECM33	ExtraCellular Mutant
II	392742	393033	292	sumo_peak_48 YBR078W	sumo_peak_48	+	YBR078W	393123	394742	upstream	-235	90	NearestStart		TEC1	Transposon Enhancement Control
II	408637	408863	227	sumo_peak_53 YBR083W	sumo_peak_53	+	YBR083W	409169	410629	upstream	-419	306	NearestStart
II	413821	415220	1400	sumo_peak_54 YBR084C-A	sumo_peak_54	-	YBR084C-A	414186	415261	overlapEnd	741	41	NearestStart		RPL19A	Ribosomal Protein of the Large subunit
II	415486	415881	396	sumo_peak_55 YBR085W	sumo_peak_55	+	YBR085W	415983	416906	upstream	-299	102	NearestStart		AAC3	ADP/ATP Carrier
II	477110	479435	2326	sumo_peak_56 YBR118W	sumo_peak_56	+	YBR118W	477671	479047	includeFeature	601	388	NearestStart		TEF2	Translation Elongation Factor
II	591585	592416	832	sumo_peak_59 YBR181C	sumo_peak_59	-	YBR181C	591712	592774	overlapEnd	774	127	NearestStart		RPS6B	Ribosomal Protein of the Small subunit
II	592909	593229	321	sumo_peak_60 YBR181C	sumo_peak_60	-	YBR181C	591712	592774	upstream	-295	135	NearestStart
II	604062	606135	2074	sumo_peak_61 YBR188C	sumo_peak_61	-	YBR188C	603685	604107	overlapStart	-991	45	NearestStart		NTC20	Prp19p (NineTeen)-associated Complex
II	606318	607123	806	sumo_peak_62 YBR191W-A	sumo_peak_62	+	YBR191W-A	607149	607223	upstream	-429	26	NearestStart
II	680284	682116	1833	sumo_peak_68 YBR230W-A	sumo_peak_68	+	YBR230W-A	680362	680562	includeFeature	838	78	NearestStart
III	114197	114750	554	sumo_peak_81 YCL001W-B	sumo_peak_81	+	YCL001W-B	113770	114024	downstream	704	173	NearestStart
III	107128	107828	701	sumo_peak_80 YCL007C	sumo_peak_80	-	YCL007C	106974	107366	overlapStart	-112	154	NearestStart
III	78322	78683	362	sumo_peak_77 YCL025C	sumo_peak_77	-	YCL025C	76018	77919	upstream	-583	403	NearestStart		AGP1	high-Affinity Glutamine Permease
III	30544	30893	350	sumo_peak_74 YCL054W	sumo_peak_74	+	YCL054W	31449	33974	upstream	-731	556	NearestStart		SPB1	Suppressor of PaB1 mutant
III	27569	27820	252	sumo_peak_73 YCL055W	sumo_peak_73	+	YCL055W	27929	28936	upstream	-235	109	NearestStart		KAR4	KARyogamy
III	14564	14785	222	sumo_peak_71 YCL065W	sumo_peak_71	+	YCL065W	13751	14119	downstream	923	445	NearestStart
III	11110	11516	407	sumo_peak_70 YCL068C	sumo_peak_70	-	YCL068C	11503	12285	overlapEnd	972	13	NearestStart
III	17	1242	1226	sumo_peak_69 YCL076W	sumo_peak_69	+	YCL076W	1392	2135	upstream	-762	150	NearestStart
III	138032	139006	975	sumo_peak_84 YCR013C	sumo_peak_84	-	YCR013C	138402	139049	overlapEnd	530	43	NearestStart
III	162528	163429	902	sumo_peak_87 YCR024C-B	sumo_peak_87	-	YCR024C-B	162599	162865	includeFeature	-113	71	NearestStart
III	178127	178753	627	sumo_peak_90 YCR031C	sumo_peak_90	-	YCR031C	177500	178220	overlapStart	-220	93	NearestStart		RPS14A	Ribosomal Protein of the Small subunit
III	179111	179385	275	sumo_peak_91 YCR032W	sumo_peak_91	+	YCR032W	179520	186023	upstream	-272	135	NearestStart		BPH1	Beige Protein Homolog
III	292692	292951	260	sumo_peak_93 YCR096C	sumo_peak_93	-	YCR096C	293179	293538	downstream	716	228	NearestStart		HMRA2	Hidden Mat Right A
III	316244	316588	345	sumo_peak_95 YCR108C	sumo_peak_95	-	YCR108C	315997	316188	upstream	-228	56	NearestStart
IV	449512	450072	561	sumo_peak_133 YDL001W	sumo_peak_133	+	YDL001W	447984	449276	downstream	1808	236	NearestStart		RMD1	Required for Meiotic nuclear Division
IV	427700	428363	664	sumo_peak_130 YDL014W	sumo_peak_130	+	YDL014W	427364	428347	overlapEnd	668	16	NearestStart		NOP1	NucleOlar Protein
IV	356814	357085	272	sumo_peak_125 YDL055C	sumo_peak_125	-	YDL055C	355674	356759	upstream	-191	55	NearestStart		PSA1
IV	341134	341621	488	sumo_peak_122 YDL060W	sumo_peak_122	+	YDL060W	341619	343985	overlapStart	-241	2	NearestStart		TSR1	Twenty S rRNA accumulation
IV	340054	340793	740	sumo_peak_121 YDL063C	sumo_peak_121	-	YDL063C	338272	340134	overlapStart	-290	80	NearestStart		SYO1	SYnchronized impOrt or SYmpOrtin
IV	321658	322280	623	sumo_peak_117 YDL075W	sumo_peak_117	+	YDL075W	322226	322988	overlapStart	-257	54	NearestStart		RPL31A	Ribosomal Protein of the Large subunit
IV	322425	322973	549	sumo_peak_118 YDL075W	sumo_peak_118	+	YDL075W	322226	322988	inside	473	15	NearestStart
IV	308010	308527	518	sumo_peak_115 YDL082W	sumo_peak_115	+	YDL082W	308424	309388	overlapStart	-156	103	NearestStart		RPL13A	Ribosomal Protein of the Large subunit
IV	306624	307797	1174	sumo_peak_114 YDL083C	sumo_peak_114	-	YDL083C	306926	307789	includeFeature	579	8	NearestStart		RPS16B	Ribosomal Protein of the Small subunit
IV	234267	234528	262	sumo_peak_113 YDL127W	sumo_peak_113	+	YDL127W	234927	235853	upstream	-529	399	NearestStart		PCL2	Pho85 CycLin
IV	229494	230799	1306	sumo_peak_112 YDL130W	sumo_peak_112	+	YDL130W	229906	230527	includeFeature	240	272	NearestStart		RPP1B	Ribosomal Protein P1 Beta
IV	221167	221504	338	sumo_peak_110 YDL133C-A	sumo_peak_110	-	YDL133C-A	221724	221801	downstream	465	220	NearestStart
IV	221635	222303	669	sumo_peak_111 YDL133C-A	sumo_peak_111	-	YDL133C-A	221724	221801	includeFeature	-168	89	NearestStart		RPL41B	Ribosomal Protein of the Large subunit
IV	216733	217544	812	sumo_peak_108 YDL136W	sumo_peak_108	+	YDL136W	217600	218367	upstream	-462	56	NearestStart		RPL35B	Ribosomal Protein of the Large subunit
IV	217838	218712	875	sumo_peak_109 YDL136W	sumo_peak_109	+	YDL136W	217600	218367	overlapEnd	675	238	NearestStart
IV	205362	205846	485	sumo_peak_105 YDL141W	sumo_peak_105	+	YDL141W	203039	205111	downstream	2565	251	NearestStart		BPL1	Biotin:apoProtein Ligase
IV	132741	133013	273	sumo_peak_104 YDL182W	sumo_peak_104	+	YDL182W	133437	134723	upstream	-560	424	NearestStart		LYS20	LYSine requiring
IV	129859	130965	1107	sumo_peak_103 YDL184C	sumo_peak_103	-	YDL184C	130407	130484	includeFeature	72	481	NearestStart		RPL41A	Ribosomal Protein of the Large subunit
IV	117031	117901	871	sumo_peak_101 YDL191W	sumo_peak_101	+	YDL191W	117664	118517	overlapStart	-198	237	NearestStart		RPL35A	Ribosomal Protein of the Large subunit
IV	118110	118819	710	sumo_peak_102 YDL191W	sumo_peak_102	+	YDL191W	117664	118517	overlapEnd	800	302	NearestStart
IV	31	451	421	sumo_peak_96 YDL248W	sumo_peak_96	+	YDL248W	1802	2953	upstream	-1561	1351	NearestStart		COS7	COnserved Sequence
IV	465269	465558	290	sumo_peak_135 YDR010C	sumo_peak_135	-	YDR010C	465051	465383	overlapStart	-31	114	NearestStart
IV	472060	472888	829	sumo_peak_138 YDR012W	sumo_peak_138	+	YDR012W	471853	472941	inside	621	53	NearestStart		RPL4B	Ribosomal Protein of the Large subunit
IV	488516	489126	611	sumo_peak_139 YDR022C	sumo_peak_139	-	YDR022C	488072	488662	overlapStart	-159	146	NearestStart		ATG31	AuTophaGy related
IV	490889	491293	405	sumo_peak_140 YDR024W	sumo_peak_140	+	YDR024W	491017	491502	overlapStart	74	128	NearestStart		FYV1	Function required for Yeast Viability
IV	491393	491619	227	sumo_peak_141 YDR025W	sumo_peak_141	+	YDR025W	491515	492324	overlapStart	-9	104	NearestStart		RPS11A	Ribosomal Protein of the Small subunit
IV	491781	492702	922	sumo_peak_142 YDR025W	sumo_peak_142	+	YDR025W	491515	492324	overlapEnd	727	266	NearestStart
IV	507613	507977	365	sumo_peak_143 YDR033W	sumo_peak_143	+	YDR033W	508147	509109	upstream	-352	170	NearestStart		MRH1	Membrane protein Related to Hsp30p
IV	556515	556736	222	sumo_peak_150 YDR050C	sumo_peak_150	-	YDR050C	555726	556472	upstream	-154	43	NearestStart		TPI1	Triose-Phosphate Isomerase
IV	568694	569156	463	sumo_peak_151 YDR058C	sumo_peak_151	-	YDR058C	567723	568703	overlapStart	-222	9	NearestStart		TGL2	TriacylGlycerol Lipase
IV	579087	580813	1727	sumo_peak_152 YDR064W	sumo_peak_152	+	YDR064W	579458	580452	includeFeature	492	361	NearestStart		RPS13	Ribosomal Protein of the Small subunit
IV	645032	645357	326	sumo_peak_156 YDR098C	sumo_peak_156	-	YDR098C	644178	645035	overlapStart	-159	3	NearestStart		GRX3	GlutaRedoXin
IV	1087046	1087367	322	sumo_peak_174 YDR312W	sumo_peak_174	+	YDR312W	1087581	1088942	upstream	-375	214	NearestStart		SSF2	Suppressor of ste4 (Four)
IV	1090163	1090428	266	sumo_peak_175 YDR313C	sumo_peak_175	-	YDR313C	1089219	1090079	upstream	-217	84	NearestStart		PIB1	PhosphatidylInositol(3)-phosphate Binding
IV	1150661	1151131	471	sumo_peak_179 YDR340W	sumo_peak_179	+	YDR340W	1150881	1151183	overlapStart	15	52	NearestStart
IV	1161595	1161857	263	sumo_peak_180 YDR343C	sumo_peak_180	-	YDR343C	1159608	1161320	upstream	-406	275	NearestStart		HXT6	HeXose Transporter
IV	1238165	1238486	322	sumo_peak_187 YDR381C-A	sumo_peak_187	-	YDR381C-A	1238312	1238850	overlapEnd	524	147	NearestStart
IV	1239388	1240180	793	sumo_peak_188 YDR382W	sumo_peak_188	+	YDR382W	1239492	1239824	includeFeature	292	104	NearestStart		RPP2B	Ribosomal Protein P2 Beta
IV	1243489	1246168	2680	sumo_peak_190 YDR386W	sumo_peak_190	+	YDR386W	1246084	1247982	overlapStart	-1256	84	NearestStart		MUS81	MMS and UV Sensitive
IV	1301801	1302433	633	sumo_peak_194 YDR417C	sumo_peak_194	-	YDR417C	1301555	1301926	overlapStart	-191	125	NearestStart
IV	1300903	1301294	392	sumo_peak_193 YDR418W	sumo_peak_193	+	YDR418W	1301616	1302113	upstream	-518	322	NearestStart		RPL12B	Ribosomal Protein of the Large subunit
IV	1329785	1330044	260	sumo_peak_196 YDR433W	sumo_peak_196	+	YDR433W	1329600	1330040	overlapEnd	314	4	NearestStart
IV	1354476	1355610	1135	sumo_peak_198 YDR447C	sumo_peak_198	-	YDR447C	1354829	1355553	includeFeature	510	57	NearestStart		RPS17B	Ribosomal Protein of the Small subunit
IV	1355692	1355971	280	sumo_peak_199 YDR448W	sumo_peak_199	+	YDR448W	1356065	1357369	upstream	-233	94	NearestStart		ADA2	transcriptional ADAptor
IV	1359444	1361116	1673	sumo_peak_200 YDR450W	sumo_peak_200	+	YDR450W	1359923	1360798	includeFeature	357	318	NearestStart		RPS18A	Ribosomal Protein of the Small subunit
IV	1401264	1401899	636	sumo_peak_201 YDR471W	sumo_peak_201	+	YDR471W	1401770	1402564	overlapStart	-188	129	NearestStart		RPL27B	Ribosomal Protein of the Large subunit
IV	1447280	1447515	236	sumo_peak_203 YDR498C	sumo_peak_203	-	YDR498C	1445843	1446994	upstream	-404	286	NearestStart		SEC20	SECretory
IV	1450223	1450493	271	sumo_peak_205 YDR500C	sumo_peak_205	-	YDR500C	1450198	1450853	inside	495	25	NearestStart		RPL37B	Ribosomal Protein of the Large subunit
IV	1450716	1451250	535	sumo_peak_206 YDR500C	sumo_peak_206	-	YDR500C	1450198	1450853	overlapStart	-130	137	NearestStart
IV	1461548	1462018	471	sumo_peak_207 YDR506C	sumo_peak_207	-	YDR506C	1459728	1461554	overlapStart	-229	6	NearestStart		GMC1	Grand Meiotic recombination Cluster
IV	1469743	1470242	500	sumo_peak_211 YDR510C-A	sumo_peak_211	-	YDR510C-A	1469695	1469811	overlapStart	-181	48	NearestStart
IV	1488982	1490054	1073	sumo_peak_212 YDR524C	sumo_peak_212	-	YDR524C	1487542	1488990	overlapStart	-528	8	NearestStart		AGE1	Arf Gap with Effector function(s)
V	151975	152357	383	sumo_peak_276 YEL001C	sumo_peak_276	-	YEL001C	150301	150978	upstream	-1188	997	NearestStart		IRC22	Increased Recombination Centers
V	143135	143662	528	sumo_peak_275 YEL006W	sumo_peak_275	+	YEL006W	144327	145334	upstream	-929	665	NearestStart		YEA6
V	140181	140826	646	sumo_peak_274 YEL008W	sumo_peak_274	+	YEL008W	140512	140892	overlapStart	-8	66	NearestStart
V	122100	122633	534	sumo_peak_269 YEL018C-A	sumo_peak_269	-	YEL018C-A	121455	121988	upstream	-378	112	NearestStart
V	85142	86866	1725	sumo_peak_263 YEL035C	sumo_peak_263	-	YEL035C	85045	85545	overlapStart	-459	97	NearestStart		UTR5	Unidentified TRanscript
V	67119	69321	2203	sumo_peak_260 YEL046C	sumo_peak_260	-	YEL046C	67629	68792	includeFeature	572	510	NearestStart		GLY1	GLYcine requiring
V	53507	53890	384	sumo_peak_258 YEL054C	sumo_peak_258	-	YEL054C	52721	53218	upstream	-480	289	NearestStart		RPL12A	Ribosomal Protein of the Large subunit
V	269066	269920	855	sumo_peak_287 YER056C-A	sumo_peak_287	-	YER056C-A	269423	270185	overlapEnd	692	265	NearestStart		RPL34A	Ribosomal Protein of the Large subunit
V	270331	270668	338	sumo_peak_288 YER056C-A	sumo_peak_288	-	YER056C-A	269423	270185	upstream	-315	146	NearestStart
V	287425	287700	276	sumo_peak_291 YER065C	sumo_peak_291	-	YER065C	285241	286914	upstream	-648	511	NearestStart		ICL1	IsoCitrate Lyase
V	303835	304337	503	sumo_peak_297 YER073W	sumo_peak_297	+	YER073W	304030	305592	overlapStart	56	195	NearestStart		ALD5	ALdehyde Dehydrogenase
V	304549	306405	1857	sumo_peak_298 YER074W	sumo_peak_298	+	YER074W	306323	307196	overlapStart	-846	82	NearestStart		RPS24A	Ribosomal Protein of the Small subunit
V	306552	307207	656	sumo_peak_299 YER074W	sumo_peak_299	+	YER074W	306323	307196	overlapEnd	557	11	NearestStart
V	362145	362590	446	sumo_peak_307 YER101C	sumo_peak_307	-	YER101C	360502	361794	upstream	-574	351	NearestStart		AST2	ATPase STabilizing
V	362679	364030	1352	sumo_peak_308 YER102W	sumo_peak_308	+	YER102W	363100	363702	includeFeature	254	328	NearestStart		RPS8B	Ribosomal Protein of the Small subunit
V	396221	396641	421	sumo_peak_309 YER116C	sumo_peak_309	-	YER116C	395348	396172	upstream	-259	49	NearestStart		SLX8	Synthetic Lethal of unknown (X) function
V	396788	398010	1223	sumo_peak_310 YER117W	sumo_peak_310	+	YER117W	396769	397653	overlapEnd	630	19	NearestStart		RPL23B	Ribosomal Protein of the Large subunit
V	423095	424326	1232	sumo_peak_311 YER131W	sumo_peak_311	+	YER131W	423952	424311	includeFeature	-242	15	NearestStart		RPS26B	Ribosomal Protein of the Small subunit
VI	90635	90960	326	sumo_peak_332 YFL023W	sumo_peak_332	+	YFL023W	90986	93376	upstream	-188	26	NearestStart		BUD27	BUD site selection
VI	82431	84464	2034	sumo_peak_330 YFL026W	sumo_peak_330	+	YFL026W	82580	83875	includeFeature	868	149	NearestStart		STE2	STErile
VI	63888	65365	1478	sumo_peak_329 YFL034C-B	sumo_peak_329	-	YFL034C-B	63016	63993	overlapStart	-633	105	NearestStart		MOB2	Mps One Binder
VI	4570	4964	395	sumo_peak_325 YFL063W	sumo_peak_325	+	YFL063W	5066	5521	upstream	-299	102	NearestStart
VI	148595	148829	235	sumo_peak_335 YFR001W	sumo_peak_335	+	YFR001W	149110	149724	upstream	-398	281	NearestStart		LOC1	LOCalization of ASH1 mRNA
VI	167258	167609	352	sumo_peak_338 YFR011C	sumo_peak_338	-	YFR011C	166746	167258	overlapStart	-176	0	NearestStart		MIC19	MItochondrial contact site and Cristae organizing system
VI	180683	181242	560	sumo_peak_339 YFR016C	sumo_peak_339	-	YFR016C	177042	180743	overlapStart	-219	60	NearestStart
VI	220115	221579	1465	sumo_peak_343 YFR031C-A	sumo_peak_343	-	YFR031C-A	220507	221418	includeFeature	571	161	NearestStart		RPL2A	Ribosomal Protein of the Large subunit
VI	222832	224164	1333	sumo_peak_345 YFR032C	sumo_peak_345	-	YFR032C	222090	222959	overlapStart	-539	127	NearestStart		RRT5	Regulator of rDNA Transcription
VI	224346	224669	324	sumo_peak_346 YFR033C	sumo_peak_346	-	YFR033C	224326	224769	inside	261	20	NearestStart		QCR6	ubiQuinol-cytochrome C oxidoReductase
VII	496658	496971	314	sumo_peak_387 YGL001C	sumo_peak_387	-	YGL001C	495453	496502	upstream	-312	156	NearestStart		ERG26	ERGosterol biosynthesis
VII	438369	439984	1616	sumo_peak_381 YGL030W	sumo_peak_381	+	YGL030W	439091	439638	includeFeature	85	346	NearestStart		RPL30	Ribosomal Protein of the Large subunit
VII	437218	438163	946	sumo_peak_380 YGL031C	sumo_peak_380	-	YGL031C	437467	437934	includeFeature	244	229	NearestStart		RPL24A	Ribosomal Protein of the Large subunit
VII	371256	371485	230	sumo_peak_375 YGL072C	sumo_peak_375	-	YGL072C	371003	371362	overlapStart	-8	106	NearestStart
VII	365982	366771	790	sumo_peak_374 YGL076C	sumo_peak_374	-	YGL076C	364335	365996	overlapStart	-380	14	NearestStart		RPL7A	Ribosomal Protein of the Large subunit
VII	345741	346635	895	sumo_peak_372 YGL088W	sumo_peak_372	+	YGL088W	345836	346201	includeFeature	352	95	NearestStart
VII	310539	312285	1747	sumo_peak_368 YGL103W	sumo_peak_368	+	YGL103W	310967	311927	includeFeature	445	358	NearestStart		RPL28	Ribosomal Protein of the Large subunit
VII	277049	278743	1695	sumo_peak_366 YGL123W	sumo_peak_366	+	YGL123W	277617	278381	includeFeature	279	362	NearestStart		RPS2	Ribosomal Protein of the Small subunit
VII	254153	255676	1524	sumo_peak_364 YGL135W	sumo_peak_364	+	YGL135W	254641	255294	includeFeature	273	382	NearestStart		RPL1B	Ribosomal Protein of the Large subunit
VII	228515	228800	286	sumo_peak_363 YGL147C	sumo_peak_363	-	YGL147C	227754	228329	upstream	-329	186	NearestStart		RPL9A	Ribosomal Protein of the Large subunit
VII	149123	149462	340	sumo_peak_359 YGL188C	sumo_peak_359	-	YGL188C	149343	149516	overlapEnd	224	54	NearestStart
VII	148854	149056	203	sumo_peak_358 YGL188C-A	sumo_peak_358	-	YGL188C-A	148824	148964	overlapStart	9	30	NearestStart
VII	147988	148727	740	sumo_peak_357 YGL189C	sumo_peak_357	-	YGL189C	148229	148588	includeFeature	230	139	NearestStart		RPS26A	Ribosomal Protein of the Small subunit
VII	533804	535203	1400	sumo_peak_392 YGR027C	sumo_peak_392	-	YGR027C	534132	534458	includeFeature	-46	328	NearestStart		RPS25A	Ribosomal Protein of the Small subunit
VII	555082	555931	850	sumo_peak_396 YGR034W	sumo_peak_396	+	YGR034W	555812	556672	overlapStart	-306	119	NearestStart		RPL26B	Ribosomal Protein of the Large subunit
VII	555988	557039	1052	sumo_peak_397 YGR034W	sumo_peak_397	+	YGR034W	555812	556672	overlapEnd	702	176	NearestStart
VII	599208	601499	2292	sumo_peak_399 YGR055W	sumo_peak_399	+	YGR055W	599417	601141	includeFeature	937	209	NearestStart		MUP1	Methionine UPtake
VII	647967	649350	1384	sumo_peak_403 YGR084C	sumo_peak_403	-	YGR084C	647123	648142	overlapStart	-516	175	NearestStart		MRP13	Mitochondrial Ribosomal Protein
VII	726437	727153	717	sumo_peak_408 YGR117C	sumo_peak_408	-	YGR117C	725049	726479	overlapStart	-316	42	NearestStart
VII	727416	728148	733	sumo_peak_409 YGR118W	sumo_peak_409	+	YGR118W	726974	727730	overlapEnd	808	314	NearestStart		RPS23A	Ribosomal Protein of the Small subunit
VII	786957	787277	321	sumo_peak_415 YGR147C	sumo_peak_415	-	YGR147C	786054	786920	upstream	-197	37	NearestStart		NAT2	N-terminal AcetylTransferase
VII	787383	788129	747	sumo_peak_416 YGR148C	sumo_peak_416	-	YGR148C	787312	787779	overlapStart	23	71	NearestStart		RPL24B	Ribosomal Protein of the Large subunit
VII	788321	788706	386	sumo_peak_417 YGR149W	sumo_peak_417	+	YGR149W	789031	790329	upstream	-517	325	NearestStart
VII	806619	807301	683	sumo_peak_420 YGR160W	sumo_peak_420	+	YGR160W	807073	807684	overlapStart	-113	228	NearestStart
VII	828436	828943	508	sumo_peak_424 YGR164W	sumo_peak_424	+	YGR164W	828625	828960	overlapStart	65	17	NearestStart
VII	919968	920288	321	sumo_peak_433 YGR214W	sumo_peak_433	+	YGR214W	920575	921788	upstream	-447	287	NearestStart		RPS0A	Ribosomal Protein of the Small subunit
VII	920382	920700	319	sumo_peak_434 YGR214W	sumo_peak_434	+	YGR214W	920575	921788	overlapStart	-34	125	NearestStart
VII	1048225	1048702	478	sumo_peak_440 YGR279C	sumo_peak_440	-	YGR279C	1048798	1049958	downstream	1494	96	NearestStart		SCW4	Soluble Cell Wall protein
VIII	103904	105882	1979	sumo_peak_452 YHL001W	sumo_peak_452	+	YHL001W	104277	105091	includeFeature	616	373	NearestStart		RPL14B	Ribosomal Protein of the Large subunit
VIII	74910	75878	969	sumo_peak_449 YHL015W	sumo_peak_449	+	YHL015W	75412	75777	includeFeature	-18	101	NearestStart		RPS20	Ribosomal Protein of the Small subunit
VIII	35288	36387	1100	sumo_peak_447 YHL033C	sumo_peak_447	-	YHL033C	35255	36025	overlapStart	187	33	NearestStart		RPL8A	Ribosomal Protein of the Large subunit
VIII	34501	35160	660	sumo_peak_446 YHL034C	sumo_peak_446	-	YHL034C	33193	34077	upstream	-753	424	NearestStart		SBP1
VIII	115897	116389	493	sumo_peak_455 YHR005C-A	sumo_peak_455	-	YHR005C-A	115620	115901	overlapStart	-242	4	NearestStart		TIM10	Translocase of the Inner Membrane
VIII	125935	126314	380	sumo_peak_457 YHR010W	sumo_peak_457	+	YHR010W	126521	127492	upstream	-397	207	NearestStart		RPL27A	Ribosomal Protein of the Large subunit
VIII	126444	127570	1127	sumo_peak_458 YHR010W	sumo_peak_458	+	YHR010W	126521	127492	includeFeature	486	77	NearestStart
VIII	147878	148773	896	sumo_peak_463 YHR021C	sumo_peak_463	-	YHR021C	147871	148669	overlapStart	343	7	NearestStart		RPS27B	Ribosomal Protein of the Small subunit
VIII	148951	149225	275	sumo_peak_464 YHR021W-A	sumo_peak_464	+	YHR021W-A	149225	149680	overlapStart	-137	0	NearestStart		ECM12	ExtraCellular Mutant
VIII	290651	292457	1807	sumo_peak_468 YHR094C	sumo_peak_468	-	YHR094C	290913	292625	overlapEnd	1071	168	NearestStart		HXT1	HeXose Transporter
VIII	372579	373202	624	sumo_peak_471 YHR134W	sumo_peak_471	+	YHR134W	371749	372558	downstream	1141	21	NearestStart		WSS1	Weak Suppressor of Smt3
VIII	451083	453040	1958	sumo_peak_475 YHR173C	sumo_peak_475	-	YHR173C	450815	451153	overlapStart	-909	70	NearestStart
VIII	466813	467233	421	sumo_peak_476 YHR180W-A	sumo_peak_476	+	YHR180W-A	466932	467114	includeFeature	91	119	NearestStart
VIII	504494	505251	758	sumo_peak_478 YHR203C	sumo_peak_478	-	YHR203C	504476	505530	inside	658	18	NearestStart		RPS4B	Ribosomal Protein of the Small subunit
VIII	505412	505675	264	sumo_peak_479 YHR203C	sumo_peak_479	-	YHR203C	504476	505530	overlapStart	-14	118	NearestStart
VIII	505831	506165	335	sumo_peak_480 YHR204W	sumo_peak_480	+	YHR204W	506319	508709	upstream	-321	154	NearestStart		MNL1	MaNnosidase-Like protein
VIII	518532	518732	201	sumo_peak_481 YHR209W	sumo_peak_481	+	YHR209W	519437	520312	upstream	-805	705	NearestStart		CRG1	Cantharidin Resistance Gene
VIII	554022	554583	562	sumo_peak_482 YHR216W	sumo_peak_482	+	YHR216W	554396	555967	overlapStart	-94	187	NearestStart		IMD2	IMP Dehydrogenase
VIII	556706	557133	428	sumo_peak_483 YHR217C	sumo_peak_483	-	YHR217C	556581	557042	overlapStart	122	91	NearestStart
VIII	562190	562623	434	sumo_peak_484 YHR219C-A	sumo_peak_484	-	YHR219C-A	561199	561681	upstream	-725	509	NearestStart
IX	336191	336587	397	sumo_peak_239 YIL009C-A	sumo_peak_239	-	YIL009C-A	335666	336212	overlapStart	-177	21	NearestStart		EST3	Ever Shorter Telomeres
IX	316161	317938	1778	sumo_peak_235 YIL018W	sumo_peak_235	+	YIL018W	316768	317932	includeFeature	282	6	NearestStart		RPL2B	Ribosomal Protein of the Large subunit
IX	257382	258106	725	sumo_peak_233 YIL051C	sumo_peak_233	-	YIL051C	257843	258280	overlapEnd	536	174	NearestStart		MMF1	Mitochondrial Matrix Factor
IX	254902	257180	2279	sumo_peak_232 YIL053W	sumo_peak_232	+	YIL053W	255115	255867	includeFeature	926	213	NearestStart		GPP1	Glycerol-3-Phosphate Phosphatase
IX	232651	232993	343	sumo_peak_230 YIL068W-A	sumo_peak_230	+	YIL068W-A	233013	233396	upstream	-191	20	NearestStart
IX	231300	232058	759	sumo_peak_228 YIL070C	sumo_peak_228	-	YIL070C	230272	231072	upstream	-607	228	NearestStart		MAM33	Mitochondrial Acidic Matrix protein
IX	174874	175254	381	sumo_peak_224 YIL102C	sumo_peak_224	-	YIL102C	174582	174887	overlapStart	-177	13	NearestStart
IX	98476	99120	645	sumo_peak_222 YIL133C	sumo_peak_222	-	YIL133C	98527	99416	overlapEnd	618	51	NearestStart		RPL16A	Ribosomal Protein of the Large subunit
IX	99592	99991	400	sumo_peak_223 YIL133C	sumo_peak_223	-	YIL133C	98527	99416	upstream	-376	176	NearestStart
IX	96680	97016	337	sumo_peak_220 YIL134C-A	sumo_peak_220	-	YIL134C-A	96522	96725	overlapStart	-123	45	NearestStart		RPL40A	Ribosomal Protein of the Large subunit
IX	68192	68658	467	sumo_peak_218 YIL148W	sumo_peak_218	+	YIL148W	68708	69528	upstream	-283	50	NearestStart
IX	68949	69607	659	sumo_peak_219 YIL148W	sumo_peak_219	+	YIL148W	68708	69528	overlapEnd	570	79	NearestStart
IX	39	267	229	sumo_peak_216 YIL177W-A	sumo_peak_216	+	YIL177W-A	846	1328	upstream	-693	579	NearestStart
IX	355739	355971	233	sumo_peak_240 YIR001C	sumo_peak_240	-	YIR001C	356143	356895	downstream	1040	172	NearestStart		SGN1	Slower Growth on Non-fermentable carbon sources
IX	394764	395032	269	sumo_peak_242 YIR020W-A	sumo_peak_242	+	YIR020W-A	394917	395159	overlapStart	-19	115	NearestStart
X	348853	349550	698	sumo_peak_508 YJL047C-A	sumo_peak_508	-	YJL047C-A	349044	349178	includeFeature	-24	191	NearestStart
X	172673	173243	571	sumo_peak_502 YJL130C	sumo_peak_502	-	YJL130C	165723	172367	upstream	-591	306	NearestStart		URA2	URAcil requiring
X	157400	157991	592	sumo_peak_500 YJL135W	sumo_peak_500	+	YJL135W	157877	158194	overlapStart	-181	114	NearestStart
X	156580	157295	716	sumo_peak_499 YJL136C	sumo_peak_499	-	YJL136C	156550	157273	overlapStart	335	22	NearestStart		RPS21B	Ribosomal Protein of the Small subunit
X	156192	156439	248	sumo_peak_498 YJL136W-A	sumo_peak_498	+	YJL136W-A	156169	156252	overlapEnd	147	23	NearestStart
X	90100	90430	331	sumo_peak_490 YJL178C	sumo_peak_490	-	YJL178C	89282	90097	upstream	-168	3	NearestStart		ATG27	AuTophaGy related
X	73424	75709	2286	sumo_peak_488 YJL191W	sumo_peak_488	+	YJL191W	73787	74611	includeFeature	779	363	NearestStart		RPS14B	Ribosomal Protein of the Small subunit
X	436025	436362	338	sumo_peak_519 YJR001W	sumo_peak_519	+	YJR001W	436802	438610	upstream	-608	440	NearestStart		AVT1	Amino acid Vacuolar Transport
X	453353	454493	1141	sumo_peak_521 YJR009C	sumo_peak_521	-	YJR009C	453683	454681	overlapEnd	758	188	NearestStart		TDH2	Triose-phosphate DeHydrogenase
X	607882	608165	284	sumo_peak_535 YJR094W-A	sumo_peak_535	+	YJR094W-A	608305	608858	upstream	-281	140	NearestStart		RPL43B	Ribosomal Protein of the Large subunit
X	620481	620713	233	sumo_peak_538 YJR103W	sumo_peak_538	+	YJR103W	620754	622490	upstream	-157	41	NearestStart		URA8	URAcil requiring
X	651254	651625	372	sumo_peak_540 YJR123W	sumo_peak_540	+	YJR123W	651901	652578	upstream	-461	276	NearestStart		RPS5	Ribosomal Protein of the Small subunit
X	651931	652979	1049	sumo_peak_541 YJR123W	sumo_peak_541	+	YJR123W	651901	652578	overlapEnd	554	30	NearestStart
X	702011	703031	1021	sumo_peak_544 YJR145C	sumo_peak_544	-	YJR145C	702027	703068	overlapEnd	547	16	NearestStart		RPS4A	Ribosomal Protein of the Small subunit
X	703255	703702	448	sumo_peak_545 YJR146W	sumo_peak_545	+	YJR146W	703885	704238	upstream	-407	183	NearestStart
X	745464	745717	254	sumo_peak_548 YJR162C	sumo_peak_548	-	YJR162C	744911	745261	upstream	-329	203	NearestStart
XI	439759	440169	411	sumo_peak_589 YKL001C	sumo_peak_589	-	YKL001C	438777	439385	upstream	-579	374	NearestStart		MET14	METhionine requiring
XI	430488	431795	1308	sumo_peak_586 YKL006C-A	sumo_peak_586	-	YKL006C-A	430198	430632	overlapStart	-510	144	NearestStart		SFT1	Suppressor of sed Five Ts
XI	385205	385496	292	sumo_peak_584 YKL028W	sumo_peak_584	+	YKL028W	385758	387206	upstream	-408	262	NearestStart		TFA1	Transcription Factor a, subunit 1
XI	334018	334882	865	sumo_peak_581 YKL056C	sumo_peak_581	-	YKL056C	334412	334915	overlapEnd	465	33	NearestStart		TMA19	Translation Machinery Associated
XI	259038	259937	900	sumo_peak_573 YKL096C-B	sumo_peak_573	-	YKL096C-B	259073	259222	includeFeature	-266	35	NearestStart
XI	163327	164534	1208	sumo_peak_567 YKL153W	sumo_peak_567	+	YKL153W	163600	164109	includeFeature	330	273	NearestStart
XI	158255	159300	1046	sumo_peak_564 YKL156W	sumo_peak_564	+	YKL156W	158613	159212	includeFeature	165	88	NearestStart		RPS27A	Ribosomal Protein of the Small subunit
XI	142809	143033	225	sumo_peak_563 YKL164C	sumo_peak_563	-	YKL164C	141794	142819	overlapStart	-102	10	NearestStart		PIR1	Protein containing Internal Repeats
XI	108753	110167	1415	sumo_peak_560 YKL180W	sumo_peak_560	+	YKL180W	109269	110129	includeFeature	191	38	NearestStart		RPL17A	Ribosomal Protein of the Large subunit
XI	105927	106790	864	sumo_peak_559 YKL181W	sumo_peak_559	+	YKL181W	107316	108599	upstream	-958	526	NearestStart		PRS1	PhosphoRibosylpyrophosphate Synthetase
XI	50	932	883	sumo_peak_549 YKL225W	sumo_peak_549	+	YKL225W	451	798	includeFeature	40	134	NearestStart
XI	551872	552348	477	sumo_peak_597 YKR057W	sumo_peak_597	+	YKR057W	551657	552242	overlapEnd	453	106	NearestStart		RPS21A	Ribosomal Protein of the Small subunit
XI	618628	619177	550	sumo_peak_602 YKR094C	sumo_peak_602	-	YKR094C	617996	618750	overlapStart	-152	122	NearestStart		RPL40B	Ribosomal Protein of the Large subunit
XI	630422	630767	346	sumo_peak_603 YKR097W	sumo_peak_603	+	YKR097W	631152	632801	upstream	-558	385	NearestStart		PCK1	Phosphoenolpyruvate CarboxyKinase
XI	666371	666802	432	sumo_peak_604 YKR106W	sumo_peak_604	+	YKR106W	661442	663289	downstream	5144	3082	NearestStart		GEX2	Glutathione EXchanger
XII	150372	150848	477	sumo_peak_617 YLL001W	sumo_peak_617	+	YLL001W	147890	150163	downstream	2720	209	NearestStart		DNM1	DyNaMin-related
XII	95580	95924	345	sumo_peak_614 YLL025W	sumo_peak_614	+	YLL025W	94747	95121	downstream	1005	459	NearestStart		PAU17	seriPAUperin
XII	86916	87174	259	sumo_peak_612 YLL027W	sumo_peak_612	+	YLL027W	87403	88155	upstream	-358	229	NearestStart		ISA1	Iron Sulfur Assembly
XII	47731	48639	909	sumo_peak_609 YLL044W	sumo_peak_609	+	YLL044W	48216	48662	overlapStart	-31	23	NearestStart
XII	48717	49196	480	sumo_peak_610 YLL045C	sumo_peak_610	-	YLL045C	47859	48629	upstream	-327	88	NearestStart		RPL8B	Ribosomal Protein of the Large subunit
XII	11087	11519	433	sumo_peak_607 YLL065W	sumo_peak_607	+	YLL065W	11726	12076	upstream	-423	207	NearestStart
XII	11679	12197	519	sumo_peak_608 YLL065W	sumo_peak_608	+	YLL065W	11726	12076	includeFeature	212	47	NearestStart
XII	5558	5912	355	sumo_peak_606 YLL066W-B	sumo_peak_606	+	YLL066W-B	5605	5775	includeFeature	130	47	NearestStart
XII	20	311	292	sumo_peak_605 YLL067W-A	sumo_peak_605	+	YLL067W-A	843	1325	upstream	-677	532	NearestStart
XII	167797	168173	377	sumo_peak_619 YLR010C	sumo_peak_619	-	YLR010C	167320	167802	overlapStart	-183	5	NearestStart		TEN1	TElomeric pathways with STn1
XII	201643	202951	1309	sumo_peak_622 YLR029C	sumo_peak_622	-	YLR029C	201976	202590	includeFeature	293	333	NearestStart		RPL15A	Ribosomal Protein of the Large subunit
XII	241649	242066	418	sumo_peak_625 YLR048W	sumo_peak_625	+	YLR048W	242232	243349	upstream	-374	166	NearestStart		RPS0B	Ribosomal Protein of the Small subunit
XII	242463	243671	1209	sumo_peak_626 YLR048W	sumo_peak_626	+	YLR048W	242232	243349	overlapEnd	835	231	NearestStart
XII	262829	264080	1252	sumo_peak_628 YLR061W	sumo_peak_628	+	YLR061W	263194	263948	includeFeature	260	132	NearestStart		RPL22A	Ribosomal Protein of the Large subunit
XII	282462	284018	1557	sumo_peak_631 YLR075W	sumo_peak_631	+	YLR075W	282927	283592	includeFeature	313	426	NearestStart		RPL10	Ribosomal Protein of the Large subunit
XII	368974	370340	1367	sumo_peak_635 YLR110C	sumo_peak_635	-	YLR110C	369697	370098	includeFeature	441	242	NearestStart		CCW12	Covalently linked Cell Wall protein
XII	371194	371423	230	sumo_peak_636 YLR113W	sumo_peak_636	+	YLR113W	371620	372927	upstream	-312	197	NearestStart		HOG1	High Osmolarity Glycerol response
XII	440832	441286	455	sumo_peak_639 YLR150W	sumo_peak_639	+	YLR150W	440467	441288	inside	592	2	NearestStart		STM1	Suppressor of ToM1
XII	498522	499850	1329	sumo_peak_648 YLR167W	sumo_peak_648	+	YLR167W	498947	499405	includeFeature	239	425	NearestStart		RPS31	Ribosomal Protein of the Small subunit
XII	515506	516921	1416	sumo_peak_650 YLR180W	sumo_peak_650	+	YLR180W	515262	516410	overlapEnd	952	244	NearestStart		SAM1	S-AdenosylMethionine requiring
XII	522130	523724	1595	sumo_peak_651 YLR185W	sumo_peak_651	+	YLR185W	522663	523288	includeFeature	264	436	NearestStart		RPL37A	Ribosomal Protein of the Large subunit
XII	569858	570932	1075	sumo_peak_655 YLR215C	sumo_peak_655	-	YLR215C	570776	571858	overlapEnd	1463	156	NearestStart		CDC123	Cell Division Cycle
XII	636627	640268	3642	sumo_peak_659 YLR249W	sumo_peak_659	+	YLR249W	636780	639914	includeFeature	1668	153	NearestStart		YEF3	Yeast Elongation Factor
XII	649441	650864	1424	sumo_peak_660 YLR256W-A	sumo_peak_660	+	YLR256W-A	651117	652439	upstream	-965	253	NearestStart
XII	673576	674231	656	sumo_peak_664 YLR264C-A	sumo_peak_664	-	YLR264C-A	673828	673944	includeFeature	40	252	NearestStart
XII	712158	712684	527	sumo_peak_667 YLR287C	sumo_peak_667	-	YLR287C	710991	712058	upstream	-363	100	NearestStart
XII	712896	713580	685	sumo_peak_668 YLR287C-A	sumo_peak_668	-	YLR287C-A	712537	713158	overlapStart	-80	262	NearestStart		RPS30A	Ribosomal Protein of the Small subunit
XII	780524	781832	1309	sumo_peak_675 YLR325C	sumo_peak_675	-	YLR325C	781143	781379	includeFeature	201	453	NearestStart		RPL38	Ribosomal Protein of the Large subunit
XII	795580	796011	432	sumo_peak_678 YLR333C	sumo_peak_678	-	YLR333C	795573	795899	overlapStart	103	7	NearestStart		RPS25B	Ribosomal Protein of the Small subunit
XII	796455	796813	359	sumo_peak_679 YLR334C	sumo_peak_679	-	YLR334C	796698	797078	overlapEnd	444	115	NearestStart
XII	796991	797419	429	sumo_peak_680 YLR334C	sumo_peak_680	-	YLR334C	796698	797078	overlapStart	-127	87	NearestStart
XII	805379	807174	1796	sumo_peak_681 YLR340W	sumo_peak_681	+	YLR340W	805887	806825	includeFeature	389	349	NearestStart		RPP0	Ribosomal Protein P0
XII	815292	816173	882	sumo_peak_687 YLR342W-A	sumo_peak_687	+	YLR342W-A	815810	815983	includeFeature	-78	190	NearestStart
XII	837605	839505	1901	sumo_peak_689 YLR355C	sumo_peak_689	-	YLR355C	838066	839253	includeFeature	698	252	NearestStart		ILV5	IsoLeucine-plus-Valine requiring
XII	855826	857606	1781	sumo_peak_690 YLR367W	sumo_peak_690	+	YLR367W	856442	857317	includeFeature	274	289	NearestStart		RPS22B	Ribosomal Protein of the Small subunit
XII	897742	899730	1989	sumo_peak_692 YLR388W	sumo_peak_692	+	YLR388W	898651	898821	includeFeature	85	909	NearestStart		RPS29A	Ribosomal Protein of the Small subunit
XII	922151	922457	307	sumo_peak_695 YLR400W	sumo_peak_695	+	YLR400W	922063	922536	inside	241	79	NearestStart
XII	930522	931395	874	sumo_peak_696 YLR406C	sumo_peak_696	-	YLR406C	931065	931755	overlapEnd	797	330	NearestStart		RPL31B	Ribosomal Protein of the Large subunit
XII	931646	931922	277	sumo_peak_697 YLR406C	sumo_peak_697	-	YLR406C	931065	931755	overlapStart	-29	109	NearestStart
XII	932106	932413	308	sumo_peak_698 YLR406C-A	sumo_peak_698	-	YLR406C-A	932206	932355	includeFeature	95	58	NearestStart
XII	950961	953603	2643	sumo_peak_702 YLR413W	sumo_peak_702	+	YLR413W	951156	953183	includeFeature	1126	195	NearestStart		INA1	INdicator of Abscission
XII	1002196	1002575	380	sumo_peak_705 YLR432W	sumo_peak_705	+	YLR432W	1002557	1004128	overlapStart	-171	18	NearestStart		IMD3	IMP Dehydrogenase
XII	1018050	1019346	1297	sumo_peak_707 YLR441C	sumo_peak_707	-	YLR441C	1018141	1018908	includeFeature	210	91	NearestStart		RPS1A	Ribosomal Protein of the Small subunit
XII	1028252	1028568	317	sumo_peak_708 YLR448W	sumo_peak_708	+	YLR448W	1028854	1029768	upstream	-444	286	NearestStart		RPL6B	Ribosomal Protein of the Large subunit
XII	1029178	1030272	1095	sumo_peak_710 YLR448W	sumo_peak_710	+	YLR448W	1028854	1029768	overlapEnd	871	324	NearestStart
XII	1064853	1065243	391	sumo_peak_713 YLR462W	sumo_peak_713	+	YLR462W	1065956	1066564	upstream	-908	713	NearestStart
XII	1071283	1071777	495	sumo_peak_714 YLR466C-B	sumo_peak_714	-	YLR466C-B	1071594	1071710	includeFeature	180	67	NearestStart
XIII	267896	268367	472	sumo_peak_738 YML001W	sumo_peak_738	+	YML001W	267174	267800	downstream	958	96	NearestStart		YPT7	Yeast Protein Two
XIII	253368	253650	283	sumo_peak_736 YML007C-A	sumo_peak_736	-	YML007C-A	253162	253272	upstream	-237	96	NearestStart
XIII	225378	226653	1276	sumo_peak_735 YML024W	sumo_peak_735	+	YML024W	225889	226697	overlapStart	127	44	NearestStart		RPS17A	Ribosomal Protein of the Small subunit
XIII	222469	223480	1012	sumo_peak_733 YML026C	sumo_peak_733	-	YML026C	222987	223828	overlapEnd	854	348	NearestStart		RPS18B	Ribosomal Protein of the Small subunit
XIII	223710	224370	661	sumo_peak_734 YML026C	sumo_peak_734	-	YML026C	222987	223828	overlapStart	-212	118	NearestStart
XIII	163741	164394	654	sumo_peak_728 YML056C	sumo_peak_728	-	YML056C	162194	164176	overlapStart	108	218	NearestStart		IMD4	IMP Dehydrogenase
XIII	147409	147778	370	sumo_peak_724 YML062C	sumo_peak_724	-	YML062C	147505	148683	overlapEnd	1089	96	NearestStart		MFT1	Mitochondrial Fusion Targeting
XIII	146414	147203	790	sumo_peak_723 YML063W	sumo_peak_723	+	YML063W	146482	147249	overlapStart	326	46	NearestStart		RPS1B	Ribosomal Protein of the Small subunit
XIII	145919	146293	375	sumo_peak_722 YML064C	sumo_peak_722	-	YML064C	145139	145876	upstream	-230	43	NearestStart		TEM1	TErmination of M phase
XIII	123193	123988	796	sumo_peak_719 YML073C	sumo_peak_719	-	YML073C	123227	124172	overlapEnd	582	34	NearestStart		RPL6A	Ribosomal Protein of the Large subunit
XIII	124041	124672	632	sumo_peak_720 YML073C	sumo_peak_720	-	YML073C	123227	124172	overlapStart	-184	131	NearestStart
XIII	91765	92138	374	sumo_peak_718 YML088W	sumo_peak_718	+	YML088W	92235	94241	upstream	-283	97	NearestStart		UFO1	UV-F-box-HO
XIII	23830	25983	2154	sumo_peak_717 YML123C	sumo_peak_717	-	YML123C	24037	25800	includeFeature	894	183	NearestStart		PHO84	PHOsphate metabolism
XIII	5406	5758	353	sumo_peak_716 YML133C	sumo_peak_716	-	YML133C	461	4684	upstream	-898	722	NearestStart
XIII	549837	551791	1955	sumo_peak_756 YMR141C	sumo_peak_756	-	YMR141C	549736	550044	overlapStart	-770	101	NearestStart
XIII	551851	553198	1348	sumo_peak_757 YMR143W	sumo_peak_757	+	YMR143W	551928	552903	includeFeature	596	77	NearestStart		RPS16A	Ribosomal Protein of the Small subunit
XIII	557452	557951	500	sumo_peak_761 YMR146C	sumo_peak_761	-	YMR146C	557481	558524	overlapEnd	822	29	NearestStart		TIF34	Translation Initiation Factor
XIII	651396	652930	1535	sumo_peak_768 YMR193C-A	sumo_peak_768	-	YMR193C-A	651072	651458	overlapStart	-705	62	NearestStart
XIII	650823	651200	378	sumo_peak_767 YMR194W	sumo_peak_767	+	YMR194W	651145	651910	overlapStart	-133	55	NearestStart		RPL36A	Ribosomal Protein of the Large subunit
XIII	732066	732505	440	sumo_peak_771 YMR230W	sumo_peak_771	+	YMR230W	732414	733141	overlapStart	-128	91	NearestStart		RPS10B	Ribosomal Protein of the Small subunit
XIII	732710	733481	772	sumo_peak_772 YMR230W-A	sumo_peak_772	+	YMR230W-A	733268	733456	includeFeature	-172	25	NearestStart
XIII	752980	754232	1253	sumo_peak_774 YMR242C	sumo_peak_774	-	YMR242C	753225	754220	includeFeature	614	12	NearestStart		RPL20A	Ribosomal Protein of the Large subunit
XIII	754403	754768	366	sumo_peak_775 YMR242W-A	sumo_peak_775	+	YMR242W-A	754297	754386	downstream	289	17	NearestStart
XIII	861175	861424	250	sumo_peak_781 YMR296C	sumo_peak_781	-	YMR296C	859215	860891	upstream	-409	284	NearestStart		LCB1	Long-Chain Base
XIII	872737	872947	211	sumo_peak_782 YMR302C	sumo_peak_782	-	YMR302C	870073	872625	upstream	-217	112	NearestStart		YME2	Yeast Mitochondrial Escape
XIII	923629	924394	766	sumo_peak_785 YMR326C	sumo_peak_785	-	YMR326C	923494	923802	overlapStart	-210	135	NearestStart
XIV	628296	629077	782	sumo_peak_834 YNL001W	sumo_peak_834	+	YNL001W	627456	628616	overlapEnd	1230	320	NearestStart		DOM34	Duplication Of Multilocus region
XIV	576571	577494	924	sumo_peak_829 YNL030W	sumo_peak_829	+	YNL030W	576727	577038	includeFeature	305	156	NearestStart		HHF2	Histone H Four
XIV	575150	576367	1218	sumo_peak_828 YNL031C	sumo_peak_828	-	YNL031C	575640	576050	includeFeature	292	317	NearestStart		HHT2	Histone H Three
XIV	499328	500816	1489	sumo_peak_820 YNL067W-B	sumo_peak_820	+	YNL067W-B	499417	499557	includeFeature	655	89	NearestStart
XIV	493749	494770	1022	sumo_peak_817 YNL069C	sumo_peak_817	-	YNL069C	493956	495001	overlapEnd	741	207	NearestStart		RPL16B	Ribosomal Protein of the Large subunit
XIV	495192	495570	379	sumo_peak_819 YNL069C	sumo_peak_819	-	YNL069C	493956	495001	upstream	-380	191	NearestStart		RPS7B	Ribosomal Protein of the Small subunit
XIV	444206	444783	578	sumo_peak_816 YNL096C	sumo_peak_816	-	YNL096C	443398	444315	overlapStart	-179	109	NearestStart
XIV	415171	416225	1055	sumo_peak_813 YNL111C	sumo_peak_813	-	YNL111C	416940	417302	downstream	1604	715	NearestStart		CYB5	CYtochrome B
XIV	413838	415062	1225	sumo_peak_812 YNL112W	sumo_peak_812	+	YNL112W	413639	416281	inside	811	199	NearestStart		DBP2	Dead Box Protein
XIV	412500	412735	236	sumo_peak_811 YNL113W	sumo_peak_811	+	YNL113W	412771	413199	upstream	-153	36	NearestStart		RPC19	RNA Polymerase C
XIV	374616	375114	499	sumo_peak_810 YNL133C	sumo_peak_810	-	YNL133C	374171	374692	overlapStart	-173	76	NearestStart		FYV6	Function required for Yeast Viability
XIV	330793	332434	1642	sumo_peak_808 YNL162W	sumo_peak_808	+	YNL162W	331322	332154	includeFeature	292	280	NearestStart		RPL42A	Ribosomal Protein of the Large subunit
XIV	302289	303744	1456	sumo_peak_807 YNL178W	sumo_peak_807	+	YNL178W	302680	303402	includeFeature	336	342	NearestStart		RPS3	Ribosomal Protein of the Small subunit
XIV	252413	254186	1774	sumo_peak_804 YNL208W	sumo_peak_804	+	YNL208W	254418	255017	upstream	-1118	232	NearestStart
XIV	173892	174808	917	sumo_peak_801 YNL251C	sumo_peak_801	-	YNL251C	172588	174315	overlapStart	-35	423	NearestStart		NRD1	Nuclear pre-mRNA Down-regulation
XIV	96033	96509	477	sumo_peak_797 YNL285W	sumo_peak_797	+	YNL285W	96173	96544	overlapStart	98	35	NearestStart
XIV	61986	62818	833	sumo_peak_791 YNL302C	sumo_peak_791	-	YNL302C	61958	62943	inside	541	28	NearestStart		RPS19B	Ribosomal Protein of the Small subunit
XIV	63118	64360	1243	sumo_peak_792 YNL302C	sumo_peak_792	-	YNL302C	61958	62943	upstream	-796	175	NearestStart
XIV	7073	7438	366	sumo_peak_787 YNL337W	sumo_peak_787	+	YNL337W	7165	7419	includeFeature	91	19	NearestStart
XIV	6486	6898	413	sumo_peak_786 YNL338W	sumo_peak_786	+	YNL338W	6561	6719	includeFeature	131	75	NearestStart
XIV	662333	662637	305	sumo_peak_840 YNR017W	sumo_peak_840	+	YNR017W	662913	663581	upstream	-428	276	NearestStart		TIM23	Translocase of the Inner Mitochondrial membrane
XIV	783167	784320	1154	sumo_peak_846 YNR077C	sumo_peak_846	-	YNR077C	783287	783541	includeFeature	-203	120	NearestStart
XV	300902	301348	447	sumo_peak_872 YOL013W-A	sumo_peak_872	+	YOL013W-A	301047	301238	includeFeature	78	110	NearestStart
XV	253781	254666	886	sumo_peak_868 YOL039W	sumo_peak_868	+	YOL039W	254297	254617	includeFeature	-73	49	NearestStart		RPP2A	Ribosomal Protein P2 Alpha
XV	253117	253724	608	sumo_peak_867 YOL040C	sumo_peak_867	-	YOL040C	253149	253577	includeFeature	157	32	NearestStart		RPS15	Ribosomal Protein of the Small subunit
XV	159164	160831	1668	sumo_peak_863 YOL086W-A	sumo_peak_863	+	YOL086W-A	159173	159445	includeFeature	825	9	NearestStart		MHF1	Mph1-associated Histone-Fold protein
XV	110020	110673	654	sumo_peak_859 YOL109W	sumo_peak_859	+	YOL109W	110297	110638	includeFeature	49	35	NearestStart		ZEO1	ZEOcin resistance
XV	92110	92640	531	sumo_peak_857 YOL121C	sumo_peak_857	-	YOL121C	92026	92850	inside	475	84	NearestStart		RPS19A	Ribosomal Protein of the Small subunit
XV	92734	94799	2066	sumo_peak_858 YOL121C	sumo_peak_858	-	YOL121C	92026	92850	overlapStart	-916	116	NearestStart
XV	87321	87668	348	sumo_peak_855 YOL123W	sumo_peak_855	+	YOL123W	87844	89448	upstream	-350	176	NearestStart		HRP1	Heterogenous nuclear RibonucleoProtein
XV	79760	80125	366	sumo_peak_852 YOL127W	sumo_peak_852	+	YOL127W	80348	81190	upstream	-406	223	NearestStart		RPL25	Ribosomal Protein of the Large subunit
XV	81288	81520	233	sumo_peak_854 YOL127W	sumo_peak_854	+	YOL127W	80348	81190	downstream	1056	98	NearestStart
XV	40249	40629	381	sumo_peak_849 YOL152W	sumo_peak_849	+	YOL152W	40748	42610	upstream	-309	119	NearestStart		FRE7	Ferric REductase
XV	73	941	869	sumo_peak_847 YOL166W-A	sumo_peak_847	+	YOL166W-A	585	740	includeFeature	-78	201	NearestStart
XV	326356	326651	296	sumo_peak_873 YOR001W	sumo_peak_873	+	YOR001W	326832	329033	upstream	-328	181	NearestStart		RRP6	Ribosomal RNA Processing
XV	326737	326998	262	sumo_peak_874 YOR001W	sumo_peak_874	+	YOR001W	326832	329033	overlapStart	36	95	NearestStart
XV	444514	446255	1742	sumo_peak_879 YOR063W	sumo_peak_879	+	YOR063W	444686	445849	includeFeature	698	172	NearestStart		RPL3	Ribosomal Protein of the Large subunit
XV	505106	505484	379	sumo_peak_882 YOR096W	sumo_peak_882	+	YOR096W	505794	506767	upstream	-499	310	NearestStart		RPS7A	Ribosomal Protein of the Small subunit
XV	505655	507033	1379	sumo_peak_883 YOR096W	sumo_peak_883	+	YOR096W	505794	506767	includeFeature	550	139	NearestStart
XV	548089	548510	422	sumo_peak_884 YOR118W	sumo_peak_884	+	YOR118W	546857	548560	inside	1443	50	NearestStart		RTC5	Restriction of Telomere Capping
XV	566824	567296	473	sumo_peak_885 YOR128C	sumo_peak_885	-	YOR128C	564476	566191	upstream	-869	633	NearestStart		ADE2	ADEnine requiring
XV	677840	679171	1332	sumo_peak_896 YOR182C	sumo_peak_896	-	YOR182C	678191	678793	includeFeature	287	351	NearestStart		RPS30B	Ribosomal Protein of the Small subunit
XV	725102	725655	554	sumo_peak_902 YOR205C	sumo_peak_902	-	YOR205C	725564	727234	overlapEnd	1856	91	NearestStart		GEP3	GEnetic interactors of Prohibitins
XV	778604	779116	513	sumo_peak_905 YOR234C	sumo_peak_905	-	YOR234C	778555	779405	inside	545	49	NearestStart		RPL33B	Ribosomal Protein of the Large subunit
XV	779288	781053	1766	sumo_peak_906 YOR234C	sumo_peak_906	-	YOR234C	778555	779405	overlapStart	-765	117	NearestStart
XV	797040	797510	471	sumo_peak_907 YOR247W	sumo_peak_907	+	YOR247W	797676	798308	upstream	-401	166	NearestStart		SRL1	Suppressor of Rad53 null Lethality
XV	866569	867270	702	sumo_peak_913 YOR292C	sumo_peak_913	-	YOR292C	865653	866582	overlapStart	-338	13	NearestStart
XV	899932	901003	1072	sumo_peak_918 YOR311C	sumo_peak_918	-	YOR311C	899056	899928	upstream	-540	4	NearestStart		DGK1	DiacylGlycerol Kinase
XV	901317	901700	384	sumo_peak_919 YOR312C	sumo_peak_919	-	YOR312C	900250	901194	upstream	-314	123	NearestStart		RPL20B	Ribosomal Protein of the Large subunit
XV	925208	925461	254	sumo_peak_920 YOR324C	sumo_peak_920	-	YOR324C	923232	925040	upstream	-294	168	NearestStart		FRT1	Functionally Related to TCP1
XV	978163	978429	267	sumo_peak_925 YOR344C	sumo_peak_925	-	YOR344C	977194	978069	upstream	-227	94	NearestStart		TYE7	Ty-mediated Expression
XV	989073	989357	285	sumo_peak_927 YOR348C	sumo_peak_927	-	YOR348C	986899	988782	upstream	-433	291	NearestStart		PUT4	Proline UTilization
XV	1003955	1004966	1012	sumo_peak_928 YOR355W	sumo_peak_928	+	YOR355W	1005137	1006705	upstream	-677	171	NearestStart		GDS1
XV	1027776	1029082	1307	sumo_peak_929 YOR369C	sumo_peak_929	-	YOR369C	1028194	1028625	includeFeature	196	418	NearestStart		RPS12	Ribosomal Protein of the Small subunit
XVI	533137	533363	227	sumo_peak_965 YPL011C	sumo_peak_965	-	YPL011C	533642	534703	downstream	1453	279	NearestStart		TAF3	TATA binding protein-Associated Factor
XVI	406866	407814	949	sumo_peak_961 YPL079W	sumo_peak_961	+	YPL079W	406636	407539	overlapEnd	704	230	NearestStart		RPL21B	Ribosomal Protein of the Large subunit
XVI	404614	406752	2139	sumo_peak_960 YPL081W	sumo_peak_960	+	YPL081W	404950	406044	includeFeature	733	336	NearestStart		RPS9A	Ribosomal Protein of the Small subunit
XVI	376819	377151	333	sumo_peak_956 YPL090C	sumo_peak_956	-	YPL090C	377291	378395	downstream	1410	140	NearestStart		RPS6A	Ribosomal Protein of the Small subunit
XVI	378654	378986	333	sumo_peak_959 YPL090C	sumo_peak_959	-	YPL090C	377291	378395	upstream	-425	259	NearestStart
XVI	302671	302968	298	sumo_peak_952 YPL131W	sumo_peak_952	+	YPL131W	303121	304014	upstream	-301	153	NearestStart		RPL5	Ribosomal Protein of the Large subunit
XVI	303085	304289	1205	sumo_peak_953 YPL131W	sumo_peak_953	+	YPL131W	303121	304014	includeFeature	566	36	NearestStart
XVI	282439	282937	499	sumo_peak_949 YPL142C	sumo_peak_949	-	YPL142C	282686	283003	overlapEnd	315	66	NearestStart
XVI	188597	188912	316	sumo_peak_944 YPL189C-A	sumo_peak_944	-	YPL189C-A	188307	188513	upstream	-241	84	NearestStart		COA2	Cytochrome Oxidase Assembly
XVI	172810	174629	1820	sumo_peak_943 YPL198W	sumo_peak_943	+	YPL198W	173152	174702	overlapStart	568	73	NearestStart		RPL7B	Ribosomal Protein of the Large subunit
XVI	134587	135075	489	sumo_peak_940 YPL220W	sumo_peak_940	+	YPL220W	135790	136443	upstream	-959	715	NearestStart		RPL1A	Ribosomal Protein of the Large subunit
XVI	136000	136501	502	sumo_peak_941 YPL220W	sumo_peak_941	+	YPL220W	135790	136443	overlapEnd	460	58	NearestStart
XVI	75264	76727	1464	sumo_peak_934 YPL250W-A	sumo_peak_934	+	YPL250W-A	75702	75989	includeFeature	294	438	NearestStart
XVI	555842	556265	424	sumo_peak_966 YPR001W	sumo_peak_966	+	YPR001W	556377	557837	upstream	-323	112	NearestStart		CIT3	CITrate synthase
XVI	653812	654829	1018	sumo_peak_978 YPR043W	sumo_peak_978	+	YPR043W	654166	654847	overlapStart	154	18	NearestStart		RPL43A	Ribosomal Protein of the Large subunit
XVI	695273	695510	238	sumo_peak_982 YPR074W-A	sumo_peak_982	+	YPR074W-A	695018	695188	downstream	374	85	NearestStart
XVI	700052	700293	242	sumo_peak_983 YPR080W	sumo_peak_983	+	YPR080W	700594	701970	upstream	-422	301	NearestStart		TEF1	Translation Elongation Factor
XVI	700408	702378	1971	sumo_peak_984 YPR080W	sumo_peak_984	+	YPR080W	700594	701970	includeFeature	799	186	NearestStart
XVI	718336	719461	1126	sumo_peak_985 YPR092W	sumo_peak_985	+	YPR092W	718379	718684	includeFeature	519	43	NearestStart
XVI	730939	731520	582	sumo_peak_986 YPR102C	sumo_peak_986	-	YPR102C	731224	731748	overlapEnd	518	228	NearestStart		RPL11A	Ribosomal Protein of the Large subunit
XVI	731649	732282	634	sumo_peak_987 YPR102C	sumo_peak_987	-	YPR102C	731224	731748	overlapStart	-218	99	NearestStart
XVI	744087	744530	444	sumo_peak_988 YPR108W-A	sumo_peak_988	+	YPR108W-A	744175	744387	includeFeature	133	88	NearestStart
XVI	785729	786129	401	sumo_peak_991 YPR124W	sumo_peak_991	+	YPR124W	786208	787428	upstream	-279	79	NearestStart		CTR1	Copper TRansport
XVI	794495	796125	1631	sumo_peak_994 YPR131C	sumo_peak_994	-	YPR131C	793911	794498	overlapStart	-812	3	NearestStart		NAT3	N-terminal AcetylTransferase
XVI	899941	900161	221	sumo_peak_1003 YPR182W	sumo_peak_1003	+	YPR182W	900194	900454	upstream	-143	33	NearestStart		SMX3

## Sheet: 2. High-Sumo peaks
row.names	space	start	end	names	peak	strand	feature	start_position	end_position	insideFeature	distancetoFeature	shortestDistance	fromOverlappingOrNearest
sumo_peak_635	XII	368974	370340	1367	YLR110C	sumo_peak_635	-	YLR110C	369697	370098	includeFeature	441	242	NearestStart	YLR110C	CCW12	Covalently linked Cell Wall protein
sumo_peak_944	XVI	188597	188912	316	YPL189C-A	sumo_peak_944	-	YPL189C-A	188307	188513	upstream	-241	84	NearestStart	YPL189C-A	COA2	Cytochrome Oxidase Assembly
sumo_peak_77	III	78322	78683	362	YCL025C	sumo_peak_77	-	YCL025C	76018	77919	upstream	-583	403	NearestStart	YCL025C	AGP1	high-Affinity Glutamine Permease
sumo_peak_603	XI	630422	630767	346	YKR097W	sumo_peak_603	+	YKR097W	631152	632801	upstream	-558	385	NearestStart	YKR097W	PCK1	Phosphoenolpyruvate CarboxyKinase
sumo_peak_174	IV	1087046	1087367	322	YDR312W	sumo_peak_174	+	YDR312W	1087581	1088942	upstream	-375	214	NearestStart	YDR312W	SSF2	Suppressor of ste4 (Four)
sumo_peak_983	XVI	700052	700293	242	YPR080W	sumo_peak_983	+	YPR080W	700594	701970	upstream	-422	301	NearestStart	YPR080W	TEF1	Translation Elongation Factor
sumo_peak_502	X	172673	173243	571	YJL130C	sumo_peak_502	-	YJL130C	165723	172367	upstream	-591	306	NearestStart	YJL130C	URA2	URAcil requiring
sumo_peak_718	XIII	91765	92138	374	YML088W	sumo_peak_718	+	YML088W	92235	94241	upstream	-283	97	NearestStart	YML088W	UFO1	UV-F-box-HO
sumo_peak_659	XII	636627	640268	3642	YLR249W	sumo_peak_659	+	YLR249W	636780	639914	includeFeature	1668	153	NearestStart	YLR249W	YEF3	Yeast Elongation Factor
sumo_peak_212	IV	1488982	1490054	1073	YDR524C	sumo_peak_212	-	YDR524C	1487542	1488990	overlapStart	-528	8	NearestStart	YDR524C	AGE1	Arf Gap with Effector function(s)
sumo_peak_143	IV	507613	507977	365	YDR033W	sumo_peak_143	+	YDR033W	508147	509109	upstream	-352	170	NearestStart	YDR033W	MRH1	Membrane protein Related to Hsp30p
sumo_peak_801	XIV	173892	174808	917	YNL251C	sumo_peak_801	-	YNL251C	172588	174315	overlapStart	-35	423	NearestStart	YNL251C	NRD1	Nuclear pre-mRNA Down-regulation
sumo_peak_631	XII	282462	284018	1557	YLR075W	sumo_peak_631	+	YLR075W	282927	283592	includeFeature	313	426	NearestStart	YLR075W	RPL10	Ribosomal Protein
sumo_peak_987	XVI	731649	732282	634	YPR102C	sumo_peak_987	-	YPR102C	731224	731748	overlapStart	-218	99	NearestStart	YPR102C	RPL11A	Ribosomal Protein
sumo_peak_258	V	53507	53890	384	YEL054C	sumo_peak_258	-	YEL054C	52721	53218	upstream	-480	289	NearestStart	YEL054C	RPL12A	Ribosomal Protein
sumo_peak_193	IV	1300903	1301294	392	YDR418W	sumo_peak_193	+	YDR418W	1301616	1302113	upstream	-518	322	NearestStart	YDR418W	RPL12B	Ribosomal Protein
sumo_peak_115	IV	308010	308527	518	YDL082W	sumo_peak_115	+	YDL082W	308424	309388	overlapStart	-156	103	NearestStart	YDL082W	RPL13A	Ribosomal Protein
sumo_peak_452	VIII	103904	105882	1979	YHL001W	sumo_peak_452	+	YHL001W	104277	105091	includeFeature	616	373	NearestStart	YHL001W	RPL14B	Ribosomal Protein
sumo_peak_223	IX	99592	99991	400	YIL133C	sumo_peak_223	-	YIL133C	98527	99416	upstream	-376	176	NearestStart	YIL133C	RPL16A	Ribosomal Protein
sumo_peak_819	XIV	495192	495570	379	YNL069C	sumo_peak_819	-	YNL069C	493956	495001	upstream	-380	191	NearestStart	YNL069C	RPL16B	Ribosomal Protein
sumo_peak_560	XI	108753	110167	1415	YKL180W	sumo_peak_560	+	YKL180W	109269	110129	includeFeature	191	38	NearestStart	YKL180W	RPL17A	Ribosomal Protein
sumo_peak_26	II	167868	168454	587	YBL027W	sumo_peak_26	+	YBL027W	168423	169376	overlapStart	-262	31	NearestStart	YBL027W	RPL19B	Ribosomal Protein
sumo_peak_364	VII	254153	255676	1524	YGL135W	sumo_peak_364	+	YGL135W	254641	255294	includeFeature	273	382	NearestStart	YGL135W	RPL1B	Ribosomal Protein
sumo_peak_919	XV	901317	901700	384	YOR312C	sumo_peak_919	-	YOR312C	900250	901194	upstream	-314	123	NearestStart	YOR312C	RPL20B	Ribosomal Protein
sumo_peak_628	XII	262829	264080	1252	YLR061W	sumo_peak_628	+	YLR061W	263194	263948	includeFeature	260	132	NearestStart	YLR061W	RPL22A	Ribosomal Protein
sumo_peak_20	II	60669	61232	564	YBL087C	sumo_peak_20	-	YBL087C	59822	60739	overlapStart	-211	70	NearestStart	YBL087C	RPL23A	Ribosomal Protein
sumo_peak_852	XV	79760	80125	366	YOL127W	sumo_peak_852	+	YOL127W	80348	81190	upstream	-406	223	NearestStart	YOL127W	RPL25	Ribosomal Protein
sumo_peak_396	VII	555082	555931	850	YGR034W	sumo_peak_396	+	YGR034W	555812	556672	overlapStart	-306	119	NearestStart	YGR034W	RPL26B	Ribosomal Protein
sumo_peak_457	VIII	125935	126314	380	YHR010W	sumo_peak_457	+	YHR010W	126521	127492	upstream	-397	207	NearestStart	YHR010W	RPL27A	Ribosomal Protein
sumo_peak_201	IV	1401264	1401899	636	YDR471W	sumo_peak_201	+	YDR471W	1401770	1402564	overlapStart	-188	129	NearestStart	YDR471W	RPL27B	Ribosomal Protein
sumo_peak_368	VII	310539	312285	1747	YGL103W	sumo_peak_368	+	YGL103W	310967	311927	includeFeature	445	358	NearestStart	YGL103W	RPL28	Ribosomal Protein
sumo_peak_235	IX	316161	317938	1778	YIL018W	sumo_peak_235	+	YIL018W	316768	317932	includeFeature	282	6	NearestStart	YIL018W	RPL2B	Ribosomal Protein
sumo_peak_381	VII	438369	439984	1616	YGL030W	sumo_peak_381	+	YGL030W	439091	439638	includeFeature	85	346	NearestStart	YGL030W	RPL30	Ribosomal Protein
sumo_peak_117	IV	321658	322280	623	YDL075W	sumo_peak_117	+	YDL075W	322226	322988	overlapStart	-257	54	NearestStart	YDL075W	RPL31A	Ribosomal Protein
sumo_peak_906	XV	779288	781053	1766	YOR234C	sumo_peak_906	-	YOR234C	778555	779405	overlapStart	-765	117	NearestStart	YOR234C	RPL33B	Ribosomal Protein
sumo_peak_101	IV	117031	117901	871	YDL191W	sumo_peak_101	+	YDL191W	117664	118517	overlapStart	-198	237	NearestStart	YDL191W	RPL35A	Ribosomal Protein
sumo_peak_108	IV	216733	217544	812	YDL136W	sumo_peak_108	+	YDL136W	217600	218367	upstream	-462	56	NearestStart	YDL136W	RPL35B	Ribosomal Protein
sumo_peak_767	XIII	650823	651200	378	YMR194W	sumo_peak_767	+	YMR194W	651145	651910	overlapStart	-133	55	NearestStart	YMR194W	RPL36A	Ribosomal Protein
sumo_peak_651	XII	522130	523724	1595	YLR185W	sumo_peak_651	+	YLR185W	522663	523288	includeFeature	264	436	NearestStart	YLR185W	RPL37A	Ribosomal Protein
sumo_peak_206	IV	1450716	1451250	535	YDR500C	sumo_peak_206	-	YDR500C	1450198	1450853	overlapStart	-130	137	NearestStart	YDR500C	RPL37B	Ribosomal Protein
sumo_peak_675	XII	780524	781832	1309	YLR325C	sumo_peak_675	-	YLR325C	781143	781379	includeFeature	201	453	NearestStart	YLR325C	RPL38	Ribosomal Protein
sumo_peak_218	IX	68192	68658	467	YIL148W	sumo_peak_218	+	YIL148W	68708	69528	upstream	-283	50	NearestStart	YIL148W	RPL40A	Ribosomal Protein
sumo_peak_602	XI	618628	619177	550	YKR094C	sumo_peak_602	-	YKR094C	617996	618750	overlapStart	-152	122	NearestStart	YKR094C	RPL40B	Ribosomal Protein
sumo_peak_103	IV	129859	130965	1107	YDL184C	sumo_peak_103	-	YDL184C	130407	130484	includeFeature	72	481	NearestStart	YDL184C	RPL41A	Ribosomal Protein
sumo_peak_111	IV	221635	222303	669	YDL133C-A	sumo_peak_111	-	YDL133C-A	221724	221801	includeFeature	-168	89	NearestStart	YDL133C-A	RPL41B	Ribosomal Protein
sumo_peak_808	XIV	330793	332434	1642	YNL162W	sumo_peak_808	+	YNL162W	331322	332154	includeFeature	292	280	NearestStart	YNL162W	RPL42A	Ribosomal Protein
sumo_peak_978	XVI	653812	654829	1018	YPR043W	sumo_peak_978	+	YPR043W	654166	654847	overlapStart	154	18	NearestStart	YPR043W	RPL43A	Ribosomal Protein
sumo_peak_720	XIII	124041	124672	632	YML073C	sumo_peak_720	-	YML073C	123227	124172	overlapStart	-184	131	NearestStart	YML073C	RPL6A	Ribosomal Protein
sumo_peak_708	XII	1028252	1028568	317	YLR448W	sumo_peak_708	+	YLR448W	1028854	1029768	upstream	-444	286	NearestStart	YLR448W	RPL6B	Ribosomal Protein
sumo_peak_374	VII	365982	366771	790	YGL076C	sumo_peak_374	-	YGL076C	364335	365996	overlapStart	-380	14	NearestStart	YGL076C	RPL7A	Ribosomal Protein
sumo_peak_610	XII	48717	49196	480	YLL045C	sumo_peak_610	-	YLL045C	47859	48629	upstream	-327	88	NearestStart	YLL045C	RPL8B	Ribosomal Protein
sumo_peak_681	XII	805379	807174	1796	YLR340W	sumo_peak_681	+	YLR340W	805887	806825	includeFeature	389	349	NearestStart	YLR340W	RPP0	Ribosomal Protein
sumo_peak_112	IV	229494	230799	1306	YDL130W	sumo_peak_112	+	YDL130W	229906	230527	includeFeature	240	272	NearestStart	YDL130W	RPP1B	Ribosomal Protein
sumo_peak_868	XV	253781	254666	886	YOL039W	sumo_peak_868	+	YOL039W	254297	254617	includeFeature	-73	49	NearestStart	YOL039W	RPP2A	Ribosomal Protein
sumo_peak_433	VII	919968	920288	321	YGR214W	sumo_peak_433	+	YGR214W	920575	921788	upstream	-447	287	NearestStart	YGR214W	RPS0A	Ribosomal Protein
sumo_peak_625	XII	241649	242066	418	YLR048W	sumo_peak_625	+	YLR048W	242232	243349	upstream	-374	166	NearestStart	YLR048W	RPS0B	Ribosomal Protein
sumo_peak_771	XIII	732066	732505	440	YMR230W	sumo_peak_771	+	YMR230W	732414	733141	overlapStart	-128	91	NearestStart	YMR230W	RPS10B	Ribosomal Protein
sumo_peak_41	II	332344	332898	555	YBR048W	sumo_peak_41	+	YBR048W	332831	333812	overlapStart	-210	67	NearestStart	YBR048W	RPS11B	Ribosomal Protein
sumo_peak_929	XV	1027776	1029082	1307	YOR369C	sumo_peak_929	-	YOR369C	1028194	1028625	includeFeature	196	418	NearestStart	YOR369C	RPS12	Ribosomal Protein
sumo_peak_488	X	73424	75709	2286	YJL191W	sumo_peak_488	+	YJL191W	73787	74611	includeFeature	779	363	NearestStart	YJL191W	RPS14B	Ribosomal Protein
sumo_peak_735	XIII	225378	226653	1276	YML024W	sumo_peak_735	+	YML024W	225889	226697	overlapStart	127	44	NearestStart	YML024W	RPS17A	Ribosomal Protein
sumo_peak_200	IV	1359444	1361116	1673	YDR450W	sumo_peak_200	+	YDR450W	1359923	1360798	includeFeature	357	318	NearestStart	YDR450W	RPS18A	Ribosomal Protein
sumo_peak_734	XIII	223710	224370	661	YML026C	sumo_peak_734	-	YML026C	222987	223828	overlapStart	-212	118	NearestStart	YML026C	RPS18B	Ribosomal Protein
sumo_peak_858	XV	92734	94799	2066	YOL121C	sumo_peak_858	-	YOL121C	92026	92850	overlapStart	-916	116	NearestStart	YOL121C	RPS19A	Ribosomal Protein
sumo_peak_792	XIV	63118	64360	1243	YNL302C	sumo_peak_792	-	YNL302C	61958	62943	upstream	-796	175	NearestStart	YNL302C	RPS19B	Ribosomal Protein
sumo_peak_707	XII	1018050	1019346	1297	YLR441C	sumo_peak_707	-	YLR441C	1018141	1018908	includeFeature	210	91	NearestStart	YLR441C	RPS1A	Ribosomal Protein
sumo_peak_366	VII	277049	278743	1695	YGL123W	sumo_peak_366	+	YGL123W	277617	278381	includeFeature	279	362	NearestStart	YGL123W	RPS2	Ribosomal Protein
sumo_peak_449	VIII	74910	75878	969	YHL015W	sumo_peak_449	+	YHL015W	75412	75777	includeFeature	-18	101	NearestStart	YHL015W	RPS20	Ribosomal Protein
sumo_peak_298	V	304549	306405	1857	YER074W	sumo_peak_298	+	YER074W	306323	307196	overlapStart	-846	82	NearestStart	YER074W	RPS24A	Ribosomal Protein
sumo_peak_392	VII	533804	535203	1400	YGR027C	sumo_peak_392	-	YGR027C	534132	534458	includeFeature	-46	328	NearestStart	YGR027C	RPS25A	Ribosomal Protein
sumo_peak_311	V	423095	424326	1232	YER131W	sumo_peak_311	+	YER131W	423952	424311	includeFeature	-242	15	NearestStart	YER131W	RPS26B	Ribosomal Protein
sumo_peak_564	XI	158255	159300	1046	YKL156W	sumo_peak_564	+	YKL156W	158613	159212	includeFeature	165	88	NearestStart	YKL156W	RPS27A	Ribosomal Protein
sumo_peak_692	XII	897742	899730	1989	YLR388W	sumo_peak_692	+	YLR388W	898651	898821	includeFeature	85	909	NearestStart	YLR388W	RPS29A	Ribosomal Protein
sumo_peak_668	XII	712896	713580	685	YLR287C-A	sumo_peak_668	-	YLR287C-A	712537	713158	overlapStart	-80	262	NearestStart	YLR287C-A	RPS30A	Ribosomal Protein
sumo_peak_896	XV	677840	679171	1332	YOR182C	sumo_peak_896	-	YOR182C	678191	678793	includeFeature	287	351	NearestStart	YOR182C	RPS30B	Ribosomal Protein
sumo_peak_648	XII	498522	499850	1329	YLR167W	sumo_peak_648	+	YLR167W	498947	499405	includeFeature	239	425	NearestStart	YLR167W	RPS31	Ribosomal Protein
sumo_peak_540	X	651254	651625	372	YJR123W	sumo_peak_540	+	YJR123W	651901	652578	upstream	-461	276	NearestStart	YJR123W	RPS5	Ribosomal Protein
sumo_peak_959	XVI	378654	378986	333	YPL090C	sumo_peak_959	-	YPL090C	377291	378395	upstream	-425	259	NearestStart	YPL090C	RPS6A	Ribosomal Protein
sumo_peak_60	II	592909	593229	321	YBR181C	sumo_peak_60	-	YBR181C	591712	592774	upstream	-295	135	NearestStart	YBR181C	RPS6B	Ribosomal Protein
sumo_peak_882	XV	505106	505484	379	YOR096W	sumo_peak_882	+	YOR096W	505794	506767	upstream	-499	310	NearestStart	YOR096W	RPS7A	Ribosomal Protein
sumo_peak_816	XIV	444206	444783	578	YNL096C	sumo_peak_816	-	YNL096C	443398	444315	overlapStart	-179	109	NearestStart	YNL096C	RPS7B	Ribosomal Protein
sumo_peak_960	XVI	404614	406752	2139	YPL081W	sumo_peak_960	+	YPL081W	404950	406044	includeFeature	733	336	NearestStart	YPL081W	RPS9A	Ribosomal Protein
sumo_peak_27	II	168647	169680	1034	YBL027W	sumo_peak_27	+	YBL027W	168423	169376	overlapEnd	741	224	NearestStart	YBL027W	RPL19B	Ribosomal Protein
sumo_peak_19	II	59856	60404	549	YBL087C	sumo_peak_19	-	YBL087C	59822	60739	inside	609	34	NearestStart	YBL087C	RPL23A	Ribosomal Protein
sumo_peak_18	II	45577	46757	1181	YBL092W	sumo_peak_18	+	YBL092W	45978	46370	includeFeature	189	387	NearestStart	YBL092W	RPL32	Ribosomal Protein
sumo_peak_986	XVI	730939	731520	582	YPR102C	sumo_peak_986	-	YPR102C	731224	731748	overlapEnd	518	228	NearestStart	YPR102C	RPL11A	Ribosomal Protein
sumo_peak_622	XII	201643	202951	1309	YLR029C	sumo_peak_622	-	YLR029C	201976	202590	includeFeature	293	333	NearestStart	YLR029C	RPL15A	Ribosomal Protein
sumo_peak_222	IX	98476	99120	645	YIL133C	sumo_peak_222	-	YIL133C	98527	99416	overlapEnd	618	51	NearestStart	YIL133C	RPL16A	Ribosomal Protein
sumo_peak_817	XIV	493749	494770	1022	YNL069C	sumo_peak_817	-	YNL069C	493956	495001	overlapEnd	741	207	NearestStart	YNL069C	RPL16B	Ribosomal Protein
sumo_peak_54	II	413821	415220	1400	YBR084C-A	sumo_peak_54	-	YBR084C-A	414186	415261	overlapEnd	741	41	NearestStart	YBR084C-A	RPL19A	Ribosomal Protein
sumo_peak_940	XVI	134587	135075	489	YPL220W	sumo_peak_940	+	YPL220W	135790	136443	upstream	-959	715	NearestStart	YPL220W	RPL1A	Ribosomal Protein
sumo_peak_774	XIII	752980	754232	1253	YMR242C	sumo_peak_774	-	YMR242C	753225	754220	includeFeature	614	12	NearestStart	YMR242C	RPL20A	Ribosomal Protein
sumo_peak_961	XVI	406866	407814	949	YPL079W	sumo_peak_961	+	YPL079W	406636	407539	overlapEnd	704	230	NearestStart	YPL079W	RPL21B	Ribosomal Protein
sumo_peak_310	V	396788	398010	1223	YER117W	sumo_peak_310	+	YER117W	396769	397653	overlapEnd	630	19	NearestStart	YER117W	RPL23B	Ribosomal Protein
sumo_peak_380	VII	437218	438163	946	YGL031C	sumo_peak_380	-	YGL031C	437467	437934	includeFeature	244	229	NearestStart	YGL031C	RPL24A	Ribosomal Protein
sumo_peak_416	VII	787383	788129	747	YGR148C	sumo_peak_416	-	YGR148C	787312	787779	overlapStart	23	71	NearestStart	YGR148C	RPL24B	Ribosomal Protein
sumo_peak_854	XV	81288	81520	233	YOL127W	sumo_peak_854	+	YOL127W	80348	81190	downstream	1056	98	NearestStart	YOL127W	RPL25	Ribosomal Protein
sumo_peak_397	VII	555988	557039	1052	YGR034W	sumo_peak_397	+	YGR034W	555812	556672	overlapEnd	702	176	NearestStart	YGR034W	RPL26B	Ribosomal Protein
sumo_peak_458	VIII	126444	127570	1127	YHR010W	sumo_peak_458	+	YHR010W	126521	127492	includeFeature	486	77	NearestStart	YHR010W	RPL27A	Ribosomal Protein
sumo_peak_343	VI	220115	221579	1465	YFR031C-A	sumo_peak_343	-	YFR031C-A	220507	221418	includeFeature	571	161	NearestStart	YFR031C-A	RPL2A	Ribosomal Protein
sumo_peak_879	XV	444514	446255	1742	YOR063W	sumo_peak_879	+	YOR063W	444686	445849	includeFeature	698	172	NearestStart	YOR063W	RPL3	Ribosomal Protein
sumo_peak_118	IV	322425	322973	549	YDL075W	sumo_peak_118	+	YDL075W	322226	322988	inside	473	15	NearestStart	YDL075W	RPL31A	Ribosomal Protein
sumo_peak_697	XII	931646	931922	277	YLR406C	sumo_peak_697	-	YLR406C	931065	931755	overlapStart	-29	109	NearestStart	YLR406C	RPL31B	Ribosomal Protein
sumo_peak_905	XV	778604	779116	513	YOR234C	sumo_peak_905	-	YOR234C	778555	779405	inside	545	49	NearestStart	YOR234C	RPL33B	Ribosomal Protein
sumo_peak_288	V	270331	270668	338	YER056C-A	sumo_peak_288	-	YER056C-A	269423	270185	upstream	-315	146	NearestStart	YER056C-A	RPL34A	Ribosomal Protein
sumo_peak_102	IV	118110	118819	710	YDL191W	sumo_peak_102	+	YDL191W	117664	118517	overlapEnd	800	302	NearestStart	YDL191W	RPL35A	Ribosomal Protein
sumo_peak_109	IV	217838	218712	875	YDL136W	sumo_peak_109	+	YDL136W	217600	218367	overlapEnd	675	238	NearestStart	YDL136W	RPL35B	Ribosomal Protein
sumo_peak_205	IV	1450223	1450493	271	YDR500C	sumo_peak_205	-	YDR500C	1450198	1450853	inside	495	25	NearestStart	YDR500C	RPL37B	Ribosomal Protein
sumo_peak_219	IX	68949	69607	659	YIL148W	sumo_peak_219	+	YIL148W	68708	69528	overlapEnd	570	79	NearestStart	YIL148W	RPL40A	Ribosomal Protein
sumo_peak_110	IV	221167	221504	338	YDL133C-A	sumo_peak_110	-	YDL133C-A	221724	221801	downstream	465	220	NearestStart	YDL133C-A	RPL41B	Ribosomal Protein
sumo_peak_535	X	607882	608165	284	YJR094W-A	sumo_peak_535	+	YJR094W-A	608305	608858	upstream	-281	140	NearestStart	YJR094W-A	RPL43B	Ribosomal Protein
sumo_peak_39	II	300092	301620	1529	YBR031W	sumo_peak_39	+	YBR031W	300166	301254	includeFeature	690	74	NearestStart	YBR031W	RPL4A	Ribosomal Protein
sumo_peak_138	IV	472060	472888	829	YDR012W	sumo_peak_138	+	YDR012W	471853	472941	inside	621	53	NearestStart	YDR012W	RPL4B	Ribosomal Protein
sumo_peak_952	XVI	302671	302968	298	YPL131W	sumo_peak_952	+	YPL131W	303121	304014	upstream	-301	153	NearestStart	YPL131W	RPL5	Ribosomal Protein
sumo_peak_719	XIII	123193	123988	796	YML073C	sumo_peak_719	-	YML073C	123227	124172	overlapEnd	582	34	NearestStart	YML073C	RPL6A	Ribosomal Protein
sumo_peak_710	XII	1029178	1030272	1095	YLR448W	sumo_peak_710	+	YLR448W	1028854	1029768	overlapEnd	871	324	NearestStart	YLR448W	RPL6B	Ribosomal Protein
sumo_peak_943	XVI	172810	174629	1820	YPL198W	sumo_peak_943	+	YPL198W	173152	174702	overlapStart	568	73	NearestStart	YPL198W	RPL7B	Ribosomal Protein
sumo_peak_447	VIII	35288	36387	1100	YHL033C	sumo_peak_447	-	YHL033C	35255	36025	overlapStart	187	33	NearestStart	YHL033C	RPL8A	Ribosomal Protein
sumo_peak_363	VII	228515	228800	286	YGL147C	sumo_peak_363	-	YGL147C	227754	228329	upstream	-329	186	NearestStart	YGL147C	RPL9A	Ribosomal Protein
sumo_peak_188	IV	1239388	1240180	793	YDR382W	sumo_peak_188	+	YDR382W	1239492	1239824	includeFeature	292	104	NearestStart	YDR382W	RPP2B	Ribosomal Protein
sumo_peak_434	VII	920382	920700	319	YGR214W	sumo_peak_434	+	YGR214W	920575	921788	overlapStart	-34	125	NearestStart	YGR214W	RPS0A	Ribosomal Protein
sumo_peak_626	XII	242463	243671	1209	YLR048W	sumo_peak_626	+	YLR048W	242232	243349	overlapEnd	835	231	NearestStart	YLR048W	RPS0B	Ribosomal Protein
sumo_peak_141	IV	491393	491619	227	YDR025W	sumo_peak_141	+	YDR025W	491515	492324	overlapStart	-9	104	NearestStart	YDR025W	RPS11A	Ribosomal Protein
sumo_peak_42	II	333081	334253	1173	YBR048W	sumo_peak_42	+	YBR048W	332831	333812	overlapEnd	836	250	NearestStart	YBR048W	RPS11B	Ribosomal Protein
sumo_peak_152	IV	579087	580813	1727	YDR064W	sumo_peak_152	+	YDR064W	579458	580452	includeFeature	492	361	NearestStart	YDR064W	RPS13	Ribosomal Protein
sumo_peak_90	III	178127	178753	627	YCR031C	sumo_peak_90	-	YCR031C	177500	178220	overlapStart	-220	93	NearestStart	YCR031C	RPS14A	Ribosomal Protein
sumo_peak_867	XV	253117	253724	608	YOL040C	sumo_peak_867	-	YOL040C	253149	253577	includeFeature	157	32	NearestStart	YOL040C	RPS15	Ribosomal Protein
sumo_peak_757	XIII	551851	553198	1348	YMR143W	sumo_peak_757	+	YMR143W	551928	552903	includeFeature	596	77	NearestStart	YMR143W	RPS16A	Ribosomal Protein
sumo_peak_114	IV	306624	307797	1174	YDL083C	sumo_peak_114	-	YDL083C	306926	307789	includeFeature	579	8	NearestStart	YDL083C	RPS16B	Ribosomal Protein
sumo_peak_198	IV	1354476	1355610	1135	YDR447C	sumo_peak_198	-	YDR447C	1354829	1355553	includeFeature	510	57	NearestStart	YDR447C	RPS17B	Ribosomal Protein
sumo_peak_733	XIII	222469	223480	1012	YML026C	sumo_peak_733	-	YML026C	222987	223828	overlapEnd	854	348	NearestStart	YML026C	RPS18B	Ribosomal Protein
sumo_peak_857	XV	92110	92640	531	YOL121C	sumo_peak_857	-	YOL121C	92026	92850	inside	475	84	NearestStart	YOL121C	RPS19A	Ribosomal Protein
sumo_peak_791	XIV	61986	62818	833	YNL302C	sumo_peak_791	-	YNL302C	61958	62943	inside	541	28	NearestStart	YNL302C	RPS19B	Ribosomal Protein
sumo_peak_723	XIII	146414	147203	790	YML063W	sumo_peak_723	+	YML063W	146482	147249	overlapStart	326	46	NearestStart	YML063W	RPS1B	Ribosomal Protein
sumo_peak_597	XI	551872	552348	477	YKR057W	sumo_peak_597	+	YKR057W	551657	552242	overlapEnd	453	106	NearestStart	YKR057W	RPS21A	Ribosomal Protein
sumo_peak_499	X	156580	157295	716	YJL136C	sumo_peak_499	-	YJL136C	156550	157273	overlapStart	335	22	NearestStart	YJL136C	RPS21B	Ribosomal Protein
sumo_peak_690	XII	855826	857606	1781	YLR367W	sumo_peak_690	+	YLR367W	856442	857317	includeFeature	274	289	NearestStart	YLR367W	RPS22B	Ribosomal Protein
sumo_peak_409	VII	727416	728148	733	YGR118W	sumo_peak_409	+	YGR118W	726974	727730	overlapEnd	808	314	NearestStart	YGR118W	RPS23A	Ribosomal Protein
sumo_peak_299	V	306552	307207	656	YER074W	sumo_peak_299	+	YER074W	306323	307196	overlapEnd	557	11	NearestStart	YER074W	RPS24A	Ribosomal Protein
sumo_peak_678	XII	795580	796011	432	YLR333C	sumo_peak_678	-	YLR333C	795573	795899	overlapStart	103	7	NearestStart	YLR333C	RPS25B	Ribosomal Protein
sumo_peak_357	VII	147988	148727	740	YGL189C	sumo_peak_357	-	YGL189C	148229	148588	includeFeature	230	139	NearestStart	YGL189C	RPS26A	Ribosomal Protein
sumo_peak_463	VIII	147878	148773	896	YHR021C	sumo_peak_463	-	YHR021C	147871	148669	overlapStart	343	7	NearestStart	YHR021C	RPS27B	Ribosomal Protein
sumo_peak_807	XIV	302289	303744	1456	YNL178W	sumo_peak_807	+	YNL178W	302680	303402	includeFeature	336	342	NearestStart	YNL178W	RPS3	Ribosomal Protein
sumo_peak_544	X	702011	703031	1021	YJR145C	sumo_peak_544	-	YJR145C	702027	703068	overlapEnd	547	16	NearestStart	YJR145C	RPS4A	Ribosomal Protein
sumo_peak_479	VIII	505412	505675	264	YHR203C	sumo_peak_479	-	YHR203C	504476	505530	overlapStart	-14	118	NearestStart	YHR203C	RPS4B	Ribosomal Protein
sumo_peak_541	X	651931	652979	1049	YJR123W	sumo_peak_541	+	YJR123W	651901	652578	overlapEnd	554	30	NearestStart	YJR123W	RPS5	Ribosomal Protein
sumo_peak_956	XVI	376819	377151	333	YPL090C	sumo_peak_956	-	YPL090C	377291	378395	downstream	1410	140	NearestStart	YPL090C	RPS6A	Ribosomal Protein
sumo_peak_59	II	591585	592416	832	YBR181C	sumo_peak_59	-	YBR181C	591712	592774	overlapEnd	774	127	NearestStart	YBR181C	RPS6B	Ribosomal Protein
sumo_peak_883	XV	505655	507033	1379	YOR096W	sumo_peak_883	+	YOR096W	505794	506767	includeFeature	550	139	NearestStart	YOR096W	RPS7A	Ribosomal Protein
sumo_peak_308	V	362679	364030	1352	YER102W	sumo_peak_308	+	YER102W	363100	363702	includeFeature	254	328	NearestStart	YER102W	RPS8B	Ribosomal Protein
sumo_peak_644	XII	481922	482343	422	RDN5-4	sumo_peak_644	+	RDN5-4	482045	482163	includeFeature	87	123	NearestStart
sumo_peak_645	XII	485521	485948	428	RDN5-5	sumo_peak_645	+	RDN5-5	485697	485815	includeFeature	37	133	NearestStart
sumo_peak_646	XII	489170	489573	404	RDN5-6	sumo_peak_646	+	RDN5-6	489349	489469	includeFeature	23	104	NearestStart
sumo_peak_268	V	117475	118306	832	RPR1	sumo_peak_268	-	RPR1	117667	118035	includeFeature	145	192	NearestStart
sumo_peak_344	VI	221680	222095	416	RUF23	sumo_peak_344	+	RUF23	221714	221967	includeFeature	174	34	NearestStart
sumo_peak_317	V	441842	442667	826	SCR1	sumo_peak_317	+	SCR1	441987	442508	includeFeature	267	145	NearestStart
sumo_peak_495	X	139083	140301	1219	snR128	sumo_peak_495	-	snR128	139566	139691	includeFeature	-1	483	NearestStart			snoRNA
sumo_peak_202	IV	1402010	1403398	1389	snR13	sumo_peak_202	+	snR13	1402919	1403042	includeFeature	-215	356	NearestStart			snoRNA
sumo_peak_947	XVI	280587	281951	1365	snR17b	sumo_peak_947	-	snR17b	281056	281517	includeFeature	248	434	NearestStart			snoRNA
sumo_peak_621	XII	198573	199756	1184	snR30	sumo_peak_621	+	snR30	198784	199389	includeFeature	380	211	NearestStart			snoRNA
sumo_peak_472	VIII	381345	383322	1978	snR32	sumo_peak_472	+	snR32	381540	381727	includeFeature	794	195	NearestStart			snoRNA
sumo_peak_505	X	227712	228678	967	snR37	sumo_peak_505	-	snR37	228094	228479	includeFeature	284	199	NearestStart			snoRNA
sumo_peak_312	V	424447	425485	1039	snR4	sumo_peak_312	+	snR4	424698	424883	includeFeature	268	251	NearestStart			snoRNA
sumo_peak_796	XIV	88890	89741	852	snR40	sumo_peak_796	+	snR40	89210	89306	includeFeature	106	320	NearestStart			snoRNA
sumo_peak_997	XVI	821542	822335	794	snR45	sumo_peak_997	+	snR45	821732	821903	includeFeature	206	190	NearestStart			snoRNA
sumo_peak_148	IV	541318	541954	637	snR47	sumo_peak_148	-	snR47	541602	541700	includeFeature	64	254	NearestStart			snoRNA
sumo_peak_400	VII	609240	610146	907	snR48	sumo_peak_400	+	snR48	609584	609696	includeFeature	109	344	NearestStart			snoRNA
sumo_peak_842	XIV	715897	716677	781	snR49	sumo_peak_842	+	snR49	716120	716284	includeFeature	167	223	NearestStart			snoRNA
sumo_peak_313	V	430987	431531	545	snR52	sumo_peak_313	-	snR52	431129	431220	includeFeature	-39	142	NearestStart			snoRNA
sumo_peak_22	II	87874	89134	1261	snR56	sumo_peak_22	+	snR56	88190	88277	includeFeature	314	316	NearestStart			snoRNA
sumo_peak_634	XII	366054	366566	513	snR6	sumo_peak_634	+	snR6	366235	366346	includeFeature	75	181	NearestStart			snoRNA
sumo_peak_550	XI	38470	39169	700	snR64	sumo_peak_550	+	snR64	38811	38911	includeFeature	9	258	NearestStart			snoRNA
sumo_peak_259	V	60978	62167	1190	snR67	sumo_peak_259	+	snR67	61352	61433	includeFeature	220	374	NearestStart			snoRNA
sumo_peak_474	VIII	410921	411661	741	snR71	sumo_peak_474	+	snR71	411228	411317	includeFeature	63	307	NearestStart			snoRNA
sumo_peak_742	XIII	296852	298875	2024	snR78	sumo_peak_742	+	snR78	297278	297364	includeFeature	586	426	NearestStart			snoRNA
sumo_peak_909	XV	832126	832901	776	snR8	sumo_peak_909	+	snR8	832332	832521	includeFeature	182	206	NearestStart			snoRNA
sumo_peak_301	V	321986	323260	1275	SRG1	sumo_peak_301	+	SRG1	322212	322762	includeFeature	411	226	NearestStart
sumo_peak_129	IV	410224	410720	497	tA(AGC)D	sumo_peak_129	+	tA(AGC)D	410379	410451	includeFeature	93	155	NearestStart			tRNA
sumo_peak_341	VI	204791	205139	349	tA(AGC)F	sumo_peak_341	-	tA(AGC)F	204924	204996	includeFeature	31	133	NearestStart			tRNA
sumo_peak_413	VII	774166	774529	364	tA(AGC)G	sumo_peak_413	+	tA(AGC)G	774349	774421	includeFeature	-1	108	NearestStart			tRNA
sumo_peak_462	VIII	145987	146469	483	tA(AGC)H	sumo_peak_462	-	tA(AGC)H	146242	146314	includeFeature	86	155	NearestStart			tRNA
sumo_peak_503	X	197229	197584	356	tA(AGC)J	sumo_peak_503	-	tA(AGC)J	197313	197385	includeFeature	-21	84	NearestStart			tRNA
sumo_peak_572	XI	219673	220102	430	tA(AGC)K1	sumo_peak_572	+	tA(AGC)K1	219895	219967	includeFeature	-7	135	NearestStart			tRNA
sumo_peak_594	XI	517780	518176	397	tA(AGC)K2	sumo_peak_594	+	tA(AGC)K2	517988	518060	includeFeature	-10	116	NearestStart			tRNA
sumo_peak_662	XII	656732	657161	430	tA(AGC)L	sumo_peak_662	-	tA(AGC)L	656934	657006	includeFeature	60	155	NearestStart			tRNA
sumo_peak_743	XIII	321027	321315	289	tA(AGC)M1	sumo_peak_743	-	tA(AGC)M1	321147	321219	includeFeature	48	96	NearestStart			tRNA
sumo_peak_778	XIII	768241	768640	400	tA(AGC)M2	sumo_peak_778	-	tA(AGC)M2	768369	768441	includeFeature	1	128	NearestStart			tRNA
sumo_peak_1000	XVI	856456	857147	692	tA(AGC)P	sumo_peak_1000	+	tA(AGC)P	856902	856974	includeFeature	-100	173	NearestStart			tRNA
sumo_peak_8	I	166105	166580	476	tA(UGC)A	sumo_peak_8	+	tA(UGC)A	166267	166339	includeFeature	75	162	NearestStart			tRNA
sumo_peak_300	V	311799	312265	467	tA(UGC)E	sumo_peak_300	-	tA(UGC)E	312023	312095	includeFeature	63	170	NearestStart			tRNA
sumo_peak_418	VII	794241	794612	372	tA(UGC)G	sumo_peak_418	+	tA(UGC)G	794417	794489	includeFeature	9	123	NearestStart			tRNA
sumo_peak_623	XII	214694	215144	451	tA(UGC)L	sumo_peak_623	-	tA(UGC)L	214883	214955	includeFeature	36	189	NearestStart			tRNA
sumo_peak_912	XV	854016	854443	428	tA(UGC)O	sumo_peak_912	-	tA(UGC)O	854187	854259	includeFeature	29	171	NearestStart			tRNA
sumo_peak_66	II	642894	643216	323	tC(GCA)B	sumo_peak_66	-	tC(GCA)B	643007	643078	includeFeature	23	113	NearestStart			tRNA
sumo_peak_407	VII	706946	707343	398	tC(GCA)G	sumo_peak_407	-	tC(GCA)G	707108	707179	includeFeature	35	162	NearestStart			tRNA
sumo_peak_963	XVI	435732	436146	415	tC(GCA)P1	sumo_peak_963	-	tC(GCA)P1	435893	435964	includeFeature	25	161	NearestStart			tRNA
sumo_peak_990	XVI	775633	776005	373	tC(GCA)P2	sumo_peak_990	-	tC(GCA)P2	775765	775836	includeFeature	17	132	NearestStart			tRNA
sumo_peak_391	VII	531394	531748	355	tD(GUC)G1	sumo_peak_391	+	tD(GUC)G1	531610	531681	includeFeature	-39	67	NearestStart			tRNA
sumo_peak_394	VII	544415	544835	421	tD(GUC)G2	sumo_peak_394	-	tD(GUC)G2	544577	544648	includeFeature	23	162	NearestStart			tRNA
sumo_peak_237	IX	324075	324566	492	tD(GUC)I1	sumo_peak_237	-	tD(GUC)I1	324303	324374	includeFeature	54	192	NearestStart			tRNA
sumo_peak_504	X	204506	204996	491	tD(GUC)J1	sumo_peak_504	+	tD(GUC)J1	204735	204806	includeFeature	16	190	NearestStart			tRNA
sumo_peak_511	X	374243	374790	548	tD(GUC)J3	sumo_peak_511	-	tD(GUC)J3	374424	374495	includeFeature	-21	181	NearestStart			tRNA
sumo_peak_533	X	541340	541709	370	tD(GUC)J4	sumo_peak_533	+	tD(GUC)J4	541508	541579	includeFeature	16	130	NearestStart			tRNA
sumo_peak_593	XI	513175	513578	404	tD(GUC)K	sumo_peak_593	-	tD(GUC)K	513332	513403	includeFeature	27	157	NearestStart			tRNA
sumo_peak_638	XII	426925	427396	472	tD(GUC)L1	sumo_peak_638	+	tD(GUC)L1	427132	427203	includeFeature	28	193	NearestStart			tRNA
sumo_peak_677	XII	793745	795424	1680	tD(GUC)L2	sumo_peak_677	+	tD(GUC)L2	793918	793989	includeFeature	666	173	NearestStart			tRNA
sumo_peak_750	XIII	463337	463849	513	tD(GUC)M	sumo_peak_750	+	tD(GUC)M	463554	463625	includeFeature	39	217	NearestStart			tRNA
sumo_peak_886	XV	571777	572131	355	tD(GUC)O	sumo_peak_886	+	tD(GUC)O	571958	572029	includeFeature	-4	102	NearestStart			tRNA
sumo_peak_172	IV	1017003	1017447	445	tE(CUC)D	sumo_peak_172	-	tE(CUC)D	1017207	1017278	includeFeature	53	169	NearestStart			tRNA
sumo_peak_226	IX	197432	197779	348	tE(CUC)I	sumo_peak_226	+	tE(CUC)I	197592	197663	includeFeature	14	116	NearestStart			tRNA
sumo_peak_67	II	644998	645367	370	tE(UUC)B	sumo_peak_67	+	tE(UUC)B	645167	645238	includeFeature	15	129	NearestStart			tRNA
sumo_peak_78	III	82369	82779	411	tE(UUC)C	sumo_peak_78	-	tE(UUC)C	82462	82533	includeFeature	-41	93	NearestStart			tRNA
sumo_peak_279	V	176905	177582	678	tE(UUC)E1	sumo_peak_279	+	tE(UUC)E1	177099	177170	includeFeature	145	194	NearestStart			tRNA
sumo_peak_306	V	354728	355389	662	tE(UUC)E2	sumo_peak_306	+	tE(UUC)E2	354934	355005	includeFeature	124	206	NearestStart			tRNA
sumo_peak_321	V	487173	487591	419	tE(UUC)E3	sumo_peak_321	-	tE(UUC)E3	487331	487402	includeFeature	20	158	NearestStart			tRNA
sumo_peak_371	VII	328420	329037	618	tE(UUC)G1	sumo_peak_371	+	tE(UUC)G1	328583	328654	includeFeature	145	163	NearestStart			tRNA
sumo_peak_376	VII	401401	401749	349	tE(UUC)G2	sumo_peak_376	-	tE(UUC)G2	401527	401598	includeFeature	23	126	NearestStart			tRNA
sumo_peak_393	VII	541624	542140	517	tE(UUC)G3	sumo_peak_393	+	tE(UUC)G3	541850	541921	includeFeature	32	219	NearestStart			tRNA
sumo_peak_241	IX	370223	370644	422	tE(UUC)I	sumo_peak_241	+	tE(UUC)I	370417	370488	includeFeature	17	156	NearestStart			tRNA
sumo_peak_492	X	115787	116229	443	tE(UUC)J	sumo_peak_492	-	tE(UUC)J	115939	116010	includeFeature	2	152	NearestStart			tRNA
sumo_peak_562	XI	140831	141275	445	tE(UUC)K	sumo_peak_562	-	tE(UUC)K	141018	141089	includeFeature	36	186	NearestStart			tRNA
sumo_peak_741	XIII	290569	291065	497	tE(UUC)M	sumo_peak_741	+	tE(UUC)M	290801	290872	includeFeature	16	193	NearestStart			tRNA
sumo_peak_945	XVI	209984	210417	434	tE(UUC)P	sumo_peak_945	-	tE(UUC)P	210192	210263	includeFeature	63	154	NearestStart			tRNA
sumo_peak_15	II	36206	36593	388	tF(GAA)B	sumo_peak_15	+	tF(GAA)B	36398	36488	includeFeature	2	105	NearestStart			tRNA
sumo_peak_176	IV	1095195	1095646	452	tF(GAA)D	sumo_peak_176	-	tF(GAA)D	1095370	1095461	includeFeature	41	175	NearestStart			tRNA
sumo_peak_336	VI	157793	158173	381	tF(GAA)F	sumo_peak_336	-	tF(GAA)F	157916	158007	includeFeature	24	123	NearestStart			tRNA
sumo_peak_382	VII	440457	441009	553	tF(GAA)G	sumo_peak_382	-	tF(GAA)G	440716	440807	includeFeature	74	202	NearestStart			tRNA
sumo_peak_467	VIII	237712	238096	385	tF(GAA)H1	sumo_peak_467	-	tF(GAA)H1	237848	237939	includeFeature	35	136	NearestStart			tRNA
sumo_peak_470	VIII	358312	358725	414	tF(GAA)H2	sumo_peak_470	-	tF(GAA)H2	358478	358569	includeFeature	51	156	NearestStart			tRNA
sumo_peak_744	XIII	352122	352533	412	tF(GAA)M	sumo_peak_744	+	tF(GAA)M	352280	352370	includeFeature	48	158	NearestStart			tRNA
sumo_peak_967	XVI	560032	560479	448	tF(GAA)P1	sumo_peak_967	-	tF(GAA)P1	560198	560289	includeFeature	33	166	NearestStart			tRNA
sumo_peak_975	XVI	622396	622821	426	tF(GAA)P2	sumo_peak_975	-	tF(GAA)P2	622540	622631	includeFeature	23	144	NearestStart			tRNA
sumo_peak_191	IV	1256850	1257253	404	tG(CCC)D	sumo_peak_191	-	tG(CCC)D	1257008	1257079	includeFeature	27	158	NearestStart			tRNA
sumo_peak_889	XV	594204	594644	441	tG(CCC)O	sumo_peak_889	-	tG(CCC)O	594354	594425	includeFeature	1	150	NearestStart			tRNA
sumo_peak_86	III	142601	142922	322	tG(GCC)C	sumo_peak_86	-	tG(GCC)C	142701	142771	includeFeature	9	100	NearestStart			tRNA
sumo_peak_99	IV	83371	83810	440	tG(GCC)D1	sumo_peak_99	+	tG(GCC)D1	83548	83618	includeFeature	42	177	NearestStart			tRNA
sumo_peak_169	IV	992615	993054	440	tG(GCC)D2	sumo_peak_169	+	tG(GCC)D2	992832	992902	includeFeature	2	152	NearestStart			tRNA
sumo_peak_337	VI	162047	162400	354	tG(GCC)F1	sumo_peak_337	+	tG(GCC)F1	162228	162298	includeFeature	-4	102	NearestStart			tRNA
sumo_peak_425	VII	845461	845971	511	tG(GCC)G1	sumo_peak_425	+	tG(GCC)G1	845649	845719	includeFeature	67	188	NearestStart			tRNA
sumo_peak_436	VII	930825	931196	372	tG(GCC)G2	sumo_peak_436	-	tG(GCC)G2	930953	931023	includeFeature	13	128	NearestStart			tRNA
sumo_peak_514	X	396607	396967	361	tG(GCC)J1	sumo_peak_514	-	tG(GCC)J1	396726	396796	includeFeature	9	119	NearestStart			tRNA
sumo_peak_531	X	531645	532211	567	tG(GCC)J2	sumo_peak_531	+	tG(GCC)J2	531828	531898	includeFeature	100	183	NearestStart			tRNA
sumo_peak_730	XIII	183800	184176	377	tG(GCC)M	sumo_peak_730	-	tG(GCC)M	183898	183968	includeFeature	-20	98	NearestStart			tRNA
sumo_peak_864	XV	226486	226841	356	tG(GCC)O1	sumo_peak_864	-	tG(GCC)O1	226611	226681	includeFeature	17	125	NearestStart			tRNA
sumo_peak_870	XV	282002	282407	406	tG(GCC)O2	sumo_peak_870	+	tG(GCC)O2	282164	282234	includeFeature	40	162	NearestStart			tRNA
sumo_peak_968	XVI	572061	572641	581	tG(GCC)P1	sumo_peak_968	+	tG(GCC)P1	572269	572339	includeFeature	82	208	NearestStart			tRNA
sumo_peak_1001	XVI	860202	860683	482	tG(GCC)P2	sumo_peak_1001	+	tG(GCC)P2	860379	860449	includeFeature	63	177	NearestStart			tRNA
sumo_peak_414	VII	779437	779876	440	tG(UCC)G	sumo_peak_414	+	tG(UCC)G	779616	779687	includeFeature	40	179	NearestStart			tRNA
sumo_peak_860	XV	110842	111236	395	tG(UCC)O	sumo_peak_860	-	tG(UCC)O	110962	111033	includeFeature	-6	120	NearestStart			tRNA
sumo_peak_280	V	207162	207591	430	tH(GUG)E1	sumo_peak_280	+	tH(GUG)E1	207357	207428	includeFeature	19	163	NearestStart			tRNA
sumo_peak_314	V	434406	435005	600	tH(GUG)E2	sumo_peak_314	-	tH(GUG)E2	434541	434612	includeFeature	-94	135	NearestStart			tRNA
sumo_peak_354	VII	110483	110870	388	tH(GUG)G1	sumo_peak_354	-	tH(GUG)G1	110625	110696	includeFeature	20	142	NearestStart			tRNA
sumo_peak_370	VII	319610	320077	468	tH(GUG)G2	sumo_peak_370	+	tH(GUG)G2	319781	319852	includeFeature	63	171	NearestStart			tRNA
sumo_peak_448	VIII	62597	62902	306	tH(GUG)H	sumo_peak_448	+	tH(GUG)H	62755	62826	includeFeature	-5	76	NearestStart			tRNA
sumo_peak_579	XI	313212	313636	425	tH(GUG)K	sumo_peak_579	-	tH(GUG)K	313401	313472	includeFeature	48	164	NearestStart			tRNA
sumo_peak_745	XIII	362870	363285	416	tH(GUG)M	sumo_peak_745	+	tH(GUG)M	363064	363135	includeFeature	14	150	NearestStart			tRNA
sumo_peak_28	II	197339	197870	532	tI(AAU)B	sumo_peak_28	+	tI(AAU)B	197494	197567	includeFeature	110	155	NearestStart			tRNA
sumo_peak_157	IV	667830	668271	442	tI(AAU)D	sumo_peak_157	-	tI(AAU)D	668007	668080	includeFeature	30	177	NearestStart			tRNA
sumo_peak_318	V	443090	443450	361	tI(AAU)E1	sumo_peak_318	-	tI(AAU)E1	443202	443275	includeFeature	5	112	NearestStart			tRNA
sumo_peak_324	V	551156	551522	367	tI(AAU)E2	sumo_peak_324	-	tI(AAU)E2	551285	551358	includeFeature	19	129	NearestStart			tRNA
sumo_peak_412	VII	738945	739584	640	tI(AAU)G	sumo_peak_412	+	tI(AAU)G	739122	739195	includeFeature	142	177	NearestStart			tRNA
sumo_peak_225	IX	183321	183660	340	tI(AAU)I1	sumo_peak_225	-	tI(AAU)I1	183440	183513	includeFeature	23	119	NearestStart			tRNA
sumo_peak_227	IX	210499	210943	445	tI(AAU)I2	sumo_peak_227	+	tI(AAU)I2	210665	210738	includeFeature	56	166	NearestStart			tRNA
sumo_peak_673	XII	734633	735003	371	tI(AAU)L1	sumo_peak_673	+	tI(AAU)L1	734802	734875	includeFeature	16	128	NearestStart			tRNA
sumo_peak_711	XII	1051945	1052329	385	tI(AAU)L2	sumo_peak_711	-	tI(AAU)L2	1052071	1052144	includeFeature	7	126	NearestStart			tRNA
sumo_peak_827	XIV	569699	570109	411	tI(AAU)N1	sumo_peak_827	-	tI(AAU)N1	569867	569940	includeFeature	36	168	NearestStart			tRNA
sumo_peak_832	XIV	602157	602550	394	tI(AAU)N2	sumo_peak_832	+	tI(AAU)N2	602312	602385	includeFeature	42	155	NearestStart			tRNA
sumo_peak_996	XVI	819349	819807	459	tI(AAU)P1	sumo_peak_996	+	tI(AAU)P1	819529	819602	includeFeature	49	180	NearestStart			tRNA
sumo_peak_1002	XVI	880119	880548	430	tI(AAU)P2	sumo_peak_1002	-	tI(AAU)P2	880296	880369	includeFeature	35	177	NearestStart			tRNA
sumo_peak_160	IV	884231	884664	434	tI(UAU)D	sumo_peak_160	+	tI(UAU)D	884361	884493	includeFeature	87	130	NearestStart			tRNA
sumo_peak_657	XII	605099	605585	487	tI(UAU)L	sumo_peak_657	-	tI(UAU)L	605300	605432	includeFeature	90	153	NearestStart			tRNA
sumo_peak_184	IV	1201562	1202045	484	tK(CUU)D1	sumo_peak_184	+	tK(CUU)D1	1201750	1201822	includeFeature	54	188	NearestStart			tRNA
sumo_peak_197	IV	1352250	1352712	463	tK(CUU)D2	sumo_peak_197	-	tK(CUU)D2	1352466	1352538	includeFeature	57	174	NearestStart			tRNA
sumo_peak_272	V	135206	135648	443	tK(CUU)E1	sumo_peak_272	-	tK(CUU)E1	135425	135497	includeFeature	70	151	NearestStart			tRNA
sumo_peak_315	V	435600	435968	369	tK(CUU)E2	sumo_peak_315	-	tK(CUU)E2	435752	435824	includeFeature	40	144	NearestStart			tRNA
sumo_peak_347	VI	226525	226911	387	tK(CUU)F	sumo_peak_347	-	tK(CUU)F	226688	226760	includeFeature	42	151	NearestStart			tRNA
sumo_peak_356	VII	122067	122529	463	tK(CUU)G1	sumo_peak_356	+	tK(CUU)G1	122269	122341	includeFeature	29	188	NearestStart			tRNA
sumo_peak_360	VII	185566	185949	384	tK(CUU)G2	sumo_peak_360	-	tK(CUU)G2	185714	185786	includeFeature	28	148	NearestStart			tRNA
sumo_peak_429	VII	876228	876654	427	tK(CUU)G3	sumo_peak_429	+	tK(CUU)G3	876394	876466	includeFeature	47	166	NearestStart			tRNA
sumo_peak_234	IX	300050	300459	410	tK(CUU)I	sumo_peak_234	-	tK(CUU)I	300228	300300	includeFeature	46	159	NearestStart			tRNA
sumo_peak_515	X	414780	415204	425	tK(CUU)J	sumo_peak_515	+	tK(CUU)J	414966	415038	includeFeature	26	166	NearestStart			tRNA
sumo_peak_569	XI	202808	203270	463	tK(CUU)K	sumo_peak_569	+	tK(CUU)K	202999	203071	includeFeature	40	191	NearestStart			tRNA
sumo_peak_751	XIII	480434	480850	417	tK(CUU)M	sumo_peak_751	-	tK(CUU)M	480621	480693	includeFeature	51	157	NearestStart			tRNA
sumo_peak_973	XVI	581856	582320	465	tK(CUU)P	sumo_peak_973	+	tK(CUU)P	582062	582134	includeFeature	26	186	NearestStart			tRNA
sumo_peak_126	IV	359387	359835	449	tK(UUU)D	sumo_peak_126	+	tK(UUU)D	359577	359672	includeFeature	34	163	NearestStart			tRNA
sumo_peak_355	VII	115310	115778	469	tK(UUU)G1	sumo_peak_355	+	tK(UUU)G1	115488	115583	includeFeature	56	178	NearestStart			tRNA
sumo_peak_600	XI	578769	579283	515	tK(UUU)K	sumo_peak_600	+	tK(UUU)K	578965	579060	includeFeature	61	196	NearestStart			tRNA
sumo_peak_691	XII	875208	875622	415	tK(UUU)L	sumo_peak_691	+	tK(UUU)L	875376	875471	includeFeature	39	151	NearestStart			tRNA
sumo_peak_878	XV	438472	439008	537	tK(UUU)O	sumo_peak_878	+	tK(UUU)O	438643	438738	includeFeature	97	171	NearestStart			tRNA
sumo_peak_989	XVI	769027	769480	454	tK(UUU)P	sumo_peak_989	-	tK(UUU)P	769207	769302	includeFeature	48	178	NearestStart			tRNA
sumo_peak_9	I	180968	181400	433	tL(CAA)A	sumo_peak_9	+	tL(CAA)A	181141	181254	includeFeature	43	146	NearestStart			tRNA
sumo_peak_79	III	90687	91088	402	tL(CAA)C	sumo_peak_79	+	tL(CAA)C	90859	90972	includeFeature	29	116	NearestStart			tRNA
sumo_peak_361	VII	205364	205793	430	tL(CAA)G1	sumo_peak_361	+	tL(CAA)G1	205521	205634	includeFeature	57	157	NearestStart			tRNA
sumo_peak_379	VII	422908	423340	433	tL(CAA)G2	sumo_peak_379	+	tL(CAA)G2	423092	423205	includeFeature	32	135	NearestStart			tRNA
sumo_peak_426	VII	857201	857634	434	tL(CAA)G3	sumo_peak_426	-	tL(CAA)G3	857378	857491	includeFeature	73	143	NearestStart			tRNA
sumo_peak_591	XI	458423	458882	460	tL(CAA)K	sumo_peak_591	+	tL(CAA)K	458557	458670	includeFeature	95	134	NearestStart			tRNA
sumo_peak_658	XII	628149	628598	450	tL(CAA)L	sumo_peak_658	+	tL(CAA)L	628383	628497	includeFeature	-9	101	NearestStart			tRNA
sumo_peak_754	XIII	504726	505177	452	tL(CAA)M	sumo_peak_754	+	tL(CAA)M	504895	505008	includeFeature	57	169	NearestStart			tRNA
sumo_peak_815	XIV	442828	444004	1177	tL(CAA)N	sumo_peak_815	+	tL(CAA)N	443006	443119	includeFeature	410	178	NearestStart			tRNA
sumo_peak_406	VII	700468	701215	748	tL(GAG)G	sumo_peak_406	+	tL(GAG)G	700675	700756	includeFeature	167	207	NearestStart			tRNA
sumo_peak_14	II	9386	9875	490	tL(UAA)B1	sumo_peak_14	+	tL(UAA)B1	9583	9666	includeFeature	47	197	NearestStart			tRNA
sumo_peak_43	II	347442	347828	387	tL(UAA)B2	sumo_peak_43	+	tL(UAA)B2	347603	347686	includeFeature	32	142	NearestStart			tRNA
sumo_peak_145	IV	519575	519939	365	tL(UAA)D	sumo_peak_145	+	tL(UAA)D	519743	519826	includeFeature	14	113	NearestStart			tRNA
sumo_peak_518	X	424289	424713	425	tL(UAA)J	sumo_peak_518	-	tL(UAA)J	424432	424515	includeFeature	14	143	NearestStart			tRNA
sumo_peak_553	XI	84024	84386	363	tL(UAA)K	sumo_peak_553	+	tL(UAA)K	84208	84291	includeFeature	-3	95	NearestStart			tRNA
sumo_peak_703	XII	962859	963257	399	tL(UAA)L	sumo_peak_703	-	tL(UAA)L	962972	963055	includeFeature	-3	113	NearestStart			tRNA
sumo_peak_845	XIV	726013	726415	403	tL(UAA)N	sumo_peak_845	-	tL(UAA)N	726134	726217	includeFeature	3	121	NearestStart			tRNA
sumo_peak_537	X	617747	618132	386	tL(UAG)J	sumo_peak_537	+	tL(UAG)J	617919	618019	includeFeature	21	113	NearestStart			tRNA
sumo_peak_656	XII	592361	592811	451	tL(UAG)L1	sumo_peak_656	-	tL(UAG)L1	592519	592619	includeFeature	33	158	NearestStart			tRNA
sumo_peak_672	XII	731909	732339	431	tL(UAG)L2	sumo_peak_672	+	tL(UAG)L2	732090	732190	includeFeature	34	149	NearestStart			tRNA
sumo_peak_183	IV	1175656	1176044	389	tM(CAU)D	sumo_peak_183	+	tM(CAU)D	1175829	1175901	includeFeature	21	143	NearestStart			tRNA
sumo_peak_264	V	99928	100313	386	tM(CAU)E	sumo_peak_264	+	tM(CAU)E	100133	100204	includeFeature	-13	109	NearestStart			tRNA
sumo_peak_513	X	390907	391328	422	tM(CAU)J1	sumo_peak_513	-	tM(CAU)J1	391043	391115	includeFeature	-3	136	NearestStart			tRNA
sumo_peak_517	X	422777	423207	431	tM(CAU)J2	sumo_peak_517	+	tM(CAU)J2	422937	423009	includeFeature	55	160	NearestStart			tRNA
sumo_peak_527	X	517679	518065	387	tM(CAU)J3	sumo_peak_527	-	tM(CAU)J3	517813	517884	includeFeature	12	134	NearestStart			tRNA
sumo_peak_762	XIII	572774	573132	359	tM(CAU)M	sumo_peak_762	-	tM(CAU)M	572883	572955	includeFeature	2	109	NearestStart			tRNA
sumo_peak_897	XV	709996	710381	386	tM(CAU)O1	sumo_peak_897	+	tM(CAU)O1	710201	710272	includeFeature	-13	109	NearestStart			tRNA
sumo_peak_923	XV	976209	976732	524	tM(CAU)O2	sumo_peak_923	+	tM(CAU)O2	976421	976493	includeFeature	49	212	NearestStart			tRNA
sumo_peak_954	XVI	338736	339113	378	tM(CAU)P	sumo_peak_954	-	tM(CAU)P	338848	338919	includeFeature	-5	112	NearestStart			tRNA
sumo_peak_83	III	127537	127888	352	tN(GUU)C	sumo_peak_83	+	tN(GUU)C	127716	127789	includeFeature	-4	99	NearestStart			tRNA
sumo_peak_334	VI	137290	137752	463	tN(GUU)F	sumo_peak_334	-	tN(GUU)F	137486	137559	includeFeature	38	193	NearestStart			tRNA
sumo_peak_410	VII	730980	731397	418	tN(GUU)G	sumo_peak_410	+	tN(GUU)G	731137	731210	includeFeature	51	157	NearestStart			tRNA
sumo_peak_552	XI	74469	74866	398	tN(GUU)K	sumo_peak_552	+	tN(GUU)K	74624	74697	includeFeature	44	155	NearestStart			tRNA
sumo_peak_704	XII	975814	976247	434	tN(GUU)L	sumo_peak_704	-	tN(GUU)L	975983	976056	includeFeature	26	169	NearestStart			tRNA
sumo_peak_798	XIV	102524	102909	386	tN(GUU)N1	sumo_peak_798	+	tN(GUU)N1	102716	102789	includeFeature	0	120	NearestStart			tRNA
sumo_peak_836	XIV	632432	632875	444	tN(GUU)N2	sumo_peak_836	+	tN(GUU)N2	632599	632672	includeFeature	55	167	NearestStart			tRNA
sumo_peak_865	XV	228150	228542	393	tN(GUU)O1	sumo_peak_865	+	tN(GUU)O1	228331	228404	includeFeature	15	138	NearestStart			tRNA
sumo_peak_881	XV	487269	487640	372	tN(GUU)O2	sumo_peak_881	+	tN(GUU)O2	487439	487512	includeFeature	15	128	NearestStart			tRNA
sumo_peak_995	XVI	810488	810890	403	tN(GUU)P	sumo_peak_995	+	tN(GUU)P	810676	810749	includeFeature	13	141	NearestStart			tRNA
sumo_peak_82	III	123411	123848	438	tP(AGG)C	sumo_peak_82	-	tP(AGG)C	123577	123648	includeFeature	18	166	NearestStart			tRNA
sumo_peak_835	XIV	631736	632092	357	tP(AGG)N	sumo_peak_835	-	tP(AGG)N	631846	631917	includeFeature	3	110	NearestStart			tRNA
sumo_peak_5	I	139002	139312	311	tP(UGG)A	sumo_peak_5	+	tP(UGG)A	139152	139254	includeFeature	5	58	NearestStart			tRNA
sumo_peak_333	VI	101177	101613	437	tP(UGG)F	sumo_peak_333	+	tP(UGG)F	101376	101478	includeFeature	19	135	NearestStart			tRNA
sumo_peak_473	VIII	388727	389189	463	tP(UGG)H	sumo_peak_473	-	tP(UGG)H	388893	388995	includeFeature	37	166	NearestStart			tRNA
sumo_peak_613	XII	92397	92843	447	tP(UGG)L	sumo_peak_613	+	tP(UGG)L	92548	92650	includeFeature	72	151	NearestStart			tRNA
sumo_peak_731	XIII	195966	196378	413	tP(UGG)M	sumo_peak_731	-	tP(UGG)M	196068	196170	includeFeature	-2	102	NearestStart			tRNA
sumo_peak_824	XIV	546930	547397	468	tP(UGG)N1	sumo_peak_824	+	tP(UGG)N1	547094	547196	includeFeature	70	164	NearestStart			tRNA
sumo_peak_826	XIV	567923	568408	486	tP(UGG)N2	sumo_peak_826	+	tP(UGG)N2	568115	568217	includeFeature	51	191	NearestStart			tRNA
sumo_peak_880	XV	464283	464720	438	tP(UGG)O2	sumo_peak_880	+	tP(UGG)O2	464450	464551	includeFeature	52	167	NearestStart			tRNA
sumo_peak_926	XV	980492	980987	496	tP(UGG)O3	sumo_peak_926	+	tP(UGG)O3	980683	980787	includeFeature	57	191	NearestStart			tRNA
sumo_peak_779	XIII	808093	808492	400	tQ(CUG)M	sumo_peak_779	-	tQ(CUG)M	808246	808317	includeFeature	25	153	NearestStart			tRNA
sumo_peak_44	II	350654	351041	388	tQ(UUG)B	sumo_peak_44	+	tQ(UUG)B	350827	350898	includeFeature	21	143	NearestStart			tRNA
sumo_peak_88	III	168197	168607	411	tQ(UUG)C	sumo_peak_88	-	tQ(UUG)C	168301	168372	includeFeature	-30	104	NearestStart			tRNA
sumo_peak_146	IV	520784	521145	362	tQ(UUG)D1	sumo_peak_146	+	tQ(UUG)D1	520972	521043	includeFeature	-8	102	NearestStart			tRNA
sumo_peak_159	IV	802579	802945	367	tQ(UUG)D3	sumo_peak_159	-	tQ(UUG)D3	802731	802802	includeFeature	40	143	NearestStart			tRNA
sumo_peak_284	V	250105	250560	456	tQ(UUG)E1	sumo_peak_284	+	tQ(UUG)E1	250286	250357	includeFeature	46	181	NearestStart			tRNA
sumo_peak_271	V	130925	131337	413	tQ(UUG)E2	sumo_peak_271	-	tQ(UUG)E2	131082	131153	includeFeature	22	157	NearestStart			tRNA
sumo_peak_461	VIII	134129	134550	422	tQ(UUG)H	sumo_peak_461	+	tQ(UUG)H	134321	134392	includeFeature	19	158	NearestStart			tRNA
sumo_peak_640	XII	448498	448886	389	tQ(UUG)L	sumo_peak_640	-	tQ(UUG)L	448650	448721	includeFeature	29	152	NearestStart			tRNA
sumo_peak_155	IV	619790	620238	449	tR(ACG)D	sumo_peak_155	-	tR(ACG)D	619969	620041	includeFeature	27	179	NearestStart			tRNA
sumo_peak_322	V	492196	492989	794	tR(ACG)E	sumo_peak_322	-	tR(ACG)E	492352	492424	includeFeature	-168	156	NearestStart			tRNA
sumo_peak_506	X	233705	234184	480	tR(ACG)J	sumo_peak_506	+	tR(ACG)J	233939	234011	includeFeature	5	173	NearestStart			tRNA
sumo_peak_592	XI	490771	491178	408	tR(ACG)K	sumo_peak_592	+	tR(ACG)K	490968	491040	includeFeature	6	138	NearestStart			tRNA
sumo_peak_637	XII	374190	374618	429	tR(ACG)L	sumo_peak_637	+	tR(ACG)L	374355	374427	includeFeature	49	165	NearestStart			tRNA
sumo_peak_875	XV	340130	340542	413	tR(ACG)O	sumo_peak_875	-	tR(ACG)O	340299	340371	includeFeature	35	169	NearestStart			tRNA
sumo_peak_688	XII	818443	820524	2082	tR(CCG)L	sumo_peak_688	+	tR(CCG)L	818609	818680	includeFeature	875	166	NearestStart			tRNA
sumo_peak_532	X	538390	538718	329	tR(CCU)J	sumo_peak_532	+	tR(CCU)J	538555	538626	includeFeature	-1	92	NearestStart			tRNA
sumo_peak_52	II	405723	406184	462	tR(UCU)B	sumo_peak_52	+	tR(UCU)B	405878	405949	includeFeature	76	155	NearestStart			tRNA
sumo_peak_273	V	138518	139993	1476	tR(UCU)E	sumo_peak_273	+	tR(UCU)E	138666	138737	includeFeature	590	148	NearestStart			tRNA
sumo_peak_377	VII	405279	405726	448	tR(UCU)G1	sumo_peak_377	+	tR(UCU)G1	405470	405541	includeFeature	32	185	NearestStart			tRNA
sumo_peak_411	VII	736178	736539	362	tR(UCU)G3	sumo_peak_411	+	tR(UCU)G3	736340	736411	includeFeature	18	128	NearestStart			tRNA
sumo_peak_510	X	355174	355724	551	tR(UCU)J1	sumo_peak_510	+	tR(UCU)J1	355374	355445	includeFeature	75	200	NearestStart			tRNA
sumo_peak_566	XI	162348	162709	362	tR(UCU)K	sumo_peak_566	-	tR(UCU)K	162487	162558	includeFeature	30	139	NearestStart			tRNA
sumo_peak_773	XIII	747760	748129	370	tR(UCU)M1	sumo_peak_773	-	tR(UCU)M1	747892	747963	includeFeature	19	132	NearestStart			tRNA
sumo_peak_721	XIII	131635	132042	408	tR(UCU)M2	sumo_peak_721	-	tR(UCU)M2	131825	131896	includeFeature	58	146	NearestStart			tRNA
sumo_peak_10	I	182383	182772	390	tS(AGA)A	sumo_peak_10	-	tS(AGA)A	182522	182603	includeFeature	25	139	NearestStart			tRNA
sumo_peak_29	II	226900	227381	482	tS(AGA)B	sumo_peak_29	+	tS(AGA)B	227075	227156	includeFeature	65	175	NearestStart			tRNA
sumo_peak_132	IV	437610	438000	391	tS(AGA)D1	sumo_peak_132	+	tS(AGA)D1	437772	437853	includeFeature	33	147	NearestStart			tRNA
sumo_peak_167	IV	980728	981221	494	tS(AGA)D2	sumo_peak_167	-	tS(AGA)D2	980974	981055	includeFeature	81	166	NearestStart			tRNA
sumo_peak_195	IV	1305447	1305871	425	tS(AGA)D3	sumo_peak_195	+	tS(AGA)D3	1305630	1305712	includeFeature	29	159	NearestStart			tRNA
sumo_peak_398	VII	561456	561902	447	tS(AGA)G	sumo_peak_398	-	tS(AGA)G	561662	561743	includeFeature	64	159	NearestStart			tRNA
sumo_peak_460	VIII	132899	133265	367	tS(AGA)H	sumo_peak_460	-	tS(AGA)H	133026	133107	includeFeature	25	127	NearestStart			tRNA
sumo_peak_530	X	523850	524278	429	tS(AGA)J	sumo_peak_530	-	tS(AGA)J	524012	524093	includeFeature	29	162	NearestStart			tRNA
sumo_peak_737	XIII	259038	259430	393	tS(AGA)M	sumo_peak_737	-	tS(AGA)M	259158	259239	includeFeature	5	120	NearestStart			tRNA
sumo_peak_92	III	227783	228237	455	tS(CGA)C	sumo_peak_92	+	tS(CGA)C	227942	228042	includeFeature	68	159	NearestStart			tRNA
sumo_peak_340	VI	191377	191765	389	tS(GCU)F	sumo_peak_340	-	tS(GCU)F	191513	191613	includeFeature	42	136	NearestStart			tRNA
sumo_peak_676	XII	784159	784530	372	tS(GCU)L	sumo_peak_676	+	tS(GCU)L	784354	784453	includeFeature	-10	77	NearestStart			tRNA
sumo_peak_869	XV	274486	274944	459	tS(GCU)O	sumo_peak_869	+	tS(GCU)O	274673	274773	includeFeature	42	171	NearestStart			tRNA
sumo_peak_292	V	288272	288727	456	tS(UGA)E	sumo_peak_292	-	tS(UGA)E	288443	288524	includeFeature	24	171	NearestStart			tRNA
sumo_peak_231	IX	248657	249096	440	tS(UGA)I	sumo_peak_231	+	tS(UGA)I	248850	248931	includeFeature	26	165	NearestStart			tRNA
sumo_peak_979	XVI	689401	689867	467	tS(UGA)P	sumo_peak_979	+	tS(UGA)P	689565	689646	includeFeature	69	164	NearestStart			tRNA
sumo_peak_37	II	266217	266648	432	tT(AGU)B	sumo_peak_37	+	tT(AGU)B	266378	266450	includeFeature	54	161	NearestStart			tRNA
sumo_peak_94	III	295308	295809	502	tT(AGU)C	sumo_peak_94	+	tT(AGU)C	295484	295556	includeFeature	74	176	NearestStart			tRNA
sumo_peak_131	IV	434063	434487	425	tT(AGU)D	sumo_peak_131	-	tT(AGU)D	434264	434336	includeFeature	61	151	NearestStart			tRNA
sumo_peak_238	IX	325581	325990	410	tT(AGU)I2	sumo_peak_238	+	tT(AGU)I2	325748	325820	includeFeature	38	167	NearestStart			tRNA
sumo_peak_487	X	59015	59336	322	tT(AGU)J	sumo_peak_487	-	tT(AGU)J	59100	59172	includeFeature	-4	85	NearestStart			tRNA
sumo_peak_799	XIV	104637	105039	403	tT(AGU)N1	sumo_peak_799	+	tT(AGU)N1	104805	104877	includeFeature	33	162	NearestStart			tRNA
sumo_peak_825	XIV	560585	560961	377	tT(AGU)N2	sumo_peak_825	-	tT(AGU)N2	560693	560765	includeFeature	-8	108	NearestStart			tRNA
sumo_peak_861	XV	113609	113961	353	tT(AGU)O1	sumo_peak_861	+	tT(AGU)O1	113802	113874	includeFeature	-17	87	NearestStart			tRNA
sumo_peak_876	XV	353910	354268	359	tT(AGU)O2	sumo_peak_876	-	tT(AGU)O2	354041	354113	includeFeature	24	131	NearestStart			tRNA
sumo_peak_551	XI	46676	46981	306	tT(CGU)K	sumo_peak_551	-	tT(CGU)K	46735	46806	includeFeature	-22	59	NearestStart			tRNA
sumo_peak_404	VII	661560	661942	383	tT(UGU)G1	sumo_peak_404	+	tT(UGU)G1	661749	661820	includeFeature	2	122	NearestStart			tRNA
sumo_peak_439	VII	1004038	1004376	339	tT(UGU)G2	sumo_peak_439	+	tT(UGU)G2	1004216	1004287	includeFeature	-9	89	NearestStart			tRNA
sumo_peak_316	V	438519	438900	382	tV(AAC)E1	sumo_peak_316	+	tV(AAC)E1	438700	438773	includeFeature	10	127	NearestStart			tRNA
sumo_peak_320	V	469292	469648	357	tV(AAC)E2	sumo_peak_320	+	tV(AAC)E2	469457	469530	includeFeature	13	118	NearestStart			tRNA
sumo_peak_378	VII	412110	412513	404	tV(AAC)G1	sumo_peak_378	-	tV(AAC)G1	412294	412367	includeFeature	55	146	NearestStart			tRNA
sumo_peak_421	VII	823294	823693	400	tV(AAC)G2	sumo_peak_421	+	tV(AAC)G2	823482	823555	includeFeature	12	138	NearestStart			tRNA
sumo_peak_352	VII	73717	74153	437	tV(AAC)G3	sumo_peak_352	-	tV(AAC)G3	73829	73902	includeFeature	-33	112	NearestStart			tRNA
sumo_peak_450	VIII	85191	85552	362	tV(AAC)H	sumo_peak_450	-	tV(AAC)H	85298	85371	includeFeature	-1	107	NearestStart			tRNA
sumo_peak_512	X	378195	378591	397	tV(AAC)J	sumo_peak_512	+	tV(AAC)J	378360	378433	includeFeature	33	158	NearestStart			tRNA
sumo_peak_578	XI	307983	308404	422	tV(AAC)K1	sumo_peak_578	-	tV(AAC)K1	308144	308217	includeFeature	23	161	NearestStart			tRNA
sumo_peak_583	XI	379493	379892	400	tV(AAC)K2	sumo_peak_583	+	tV(AAC)K2	379680	379753	includeFeature	12	139	NearestStart			tRNA
sumo_peak_665	XII	687717	688103	387	tV(AAC)L	sumo_peak_665	-	tV(AAC)L	687859	687932	includeFeature	22	142	NearestStart			tRNA
sumo_peak_746	XIII	372271	372713	443	tV(AAC)M1	sumo_peak_746	-	tV(AAC)M1	372445	372518	includeFeature	26	174	NearestStart			tRNA
sumo_peak_749	XIII	420441	420833	393	tV(AAC)M2	sumo_peak_749	-	tV(AAC)M2	420588	420661	includeFeature	24	147	NearestStart			tRNA
sumo_peak_763	XIII	586496	586863	368	tV(AAC)M3	sumo_peak_763	-	tV(AAC)M3	586636	586709	includeFeature	29	140	NearestStart			tRNA
sumo_peak_895	XV	663525	664042	518	tV(AAC)O	sumo_peak_895	-	tV(AAC)O	663812	663885	includeFeature	101	157	NearestStart			tRNA
sumo_peak_173	IV	1075302	1075731	430	tV(CAC)D	sumo_peak_173	-	tV(CAC)D	1075472	1075544	includeFeature	28	170	NearestStart			tRNA
sumo_peak_477	VIII	475508	475906	399	tV(CAC)H	sumo_peak_477	-	tV(CAC)H	475706	475778	includeFeature	71	128	NearestStart			tRNA
sumo_peak_40	II	326626	327031	406	tV(UAC)B	sumo_peak_40	-	tV(UAC)B	326792	326865	includeFeature	37	166	NearestStart			tRNA
sumo_peak_367	VII	287129	287594	466	tW(CCA)G1	sumo_peak_367	-	tW(CCA)G1	287350	287455	includeFeature	93	139	NearestStart			tRNA
sumo_peak_430	VII	878627	878996	370	tW(CCA)G2	sumo_peak_430	-	tW(CCA)G2	878710	878815	includeFeature	3	83	NearestStart			tRNA
sumo_peak_516	X	415783	416211	429	tW(CCA)J	sumo_peak_516	-	tW(CCA)J	415931	416036	includeFeature	39	148	NearestStart			tRNA
sumo_peak_577	XI	302771	303170	400	tW(CCA)K	sumo_peak_577	+	tW(CCA)K	302918	303023	includeFeature	52	147	NearestStart			tRNA
sumo_peak_747	XIII	379215	379586	372	tW(CCA)M	sumo_peak_747	-	tW(CCA)M	379303	379408	includeFeature	8	88	NearestStart			tRNA
sumo_peak_933	XVI	55887	56463	577	tW(CCA)P	sumo_peak_933	-	tW(CCA)P	56169	56274	includeFeature	99	189	NearestStart			tRNA
sumo_peak_166	IV	946126	946577	452	tY(GUA)D	sumo_peak_166	+	tY(GUA)D	946312	946400	includeFeature	40	177	NearestStart			tRNA
sumo_peak_342	VI	210484	210885	402	tY(GUA)F2	sumo_peak_342	-	tY(GUA)F2	210619	210707	includeFeature	23	135	NearestStart			tRNA
sumo_peak_509	X	354069	354480	412	tY(GUA)J1	sumo_peak_509	+	tY(GUA)J1	354244	354332	includeFeature	30	148	NearestStart			tRNA
sumo_peak_534	X	542822	543255	434	tY(GUA)J2	sumo_peak_534	-	tY(GUA)J2	542956	543044	includeFeature	6	134	NearestStart			tRNA
sumo_peak_729	XIII	168630	169038	409	tY(GUA)M1	sumo_peak_729	+	tY(GUA)M1	168795	168883	includeFeature	39	155	NearestStart			tRNA
sumo_peak_780	XIII	837762	838141	380	tY(GUA)M2	sumo_peak_780	+	tY(GUA)M2	837928	838016	includeFeature	24	125	NearestStart			tRNA
sumo_peak_871	XV	287986	288433	448	tY(GUA)O	sumo_peak_871	+	tY(GUA)O	288192	288280	includeFeature	18	153	NearestStart			tRNA
