# Supplementary material for: Sumoylation of Rap1 mediates the recruitment of TFIID to promote transcription of ribosomal protein genes
Source: HighWire-hosted journal article supplement (doi:10.1101/gr.185793.114), 2015-03-23
Supplement: Table_S3_-_RNA-seq.xlsx [file Table_S3_-_RNA-seq.xlsx]

## Sheet: genes.fpkm_tracking
tracking_id	gene_id	gene_short_name	locus	wt_FPKM	wt_conf_lo	wt_conf_hi	wt_status	wt+rapa_FPKM	wt+rapa_conf_lo	wt+rapa_conf_hi	wt+rapa_status	ubc9_FPKM	ubc9_conf_lo	ubc9_conf_hi	ubc9_status	ubc9+rapa_FPKM	ubc9+rapa_conf_lo	ubc9+rapa_conf_hi	ubc9+rapa_status
15S_rRNA	15S_rRNA	-	Mito:6545-8194	0	0	0	HIDATA	0	0	0	HIDATA	0	0	0	HIDATA	55833	32641.8	79024.2	OK
21S_rRNA	21S_rRNA	-	Mito:58008-62447	0	0	0	HIDATA	0	0	0	HIDATA	0	0	0	HIDATA	0	0	0	HIDATA
HRA1	HRA1	-	I:94686-99868	0.60616	0	6.59521	OK	0.346455	0	4.75358	OK	0.281881	0	3.437	OK	0.545412	0	4.26592	OK
ICR1	ICR1	-	IX:393883-397082	17.0395	13.147	20.9319	OK	21.8949	16.976	26.8138	OK	18.7251	14.4586	22.9917	OK	20.9474	16.2282	25.6665	OK
LSR1	LSR1	-	II:680687-681862	0	0	0	HIDATA	0	0	0	HIDATA	0	0	0	HIDATA	71795	39222.4	104368	OK
NME1	NME1	-	XIV:585586-585926	2440.72	1843.82	3037.63	OK	2649.82	1974	3325.64	OK	2194.18	1659.29	2729.06	OK	3178.17	2322.02	4034.32	OK
PWR1	PWR1	-	IX:393883-397082	0.126272	0	0.804368	OK	0.0604098	0	0.519461	OK	0.24679	0	1.24285	OK	0.098149	0	0.707663	OK
Q0010	Q0010	-	Mito:3951-4415	1.40406	0	3.23646	OK	1.42398	0	3.11289	OK	2.50268	0	5.13139	OK	3.55527	0.67106	6.43948	OK
Q0017	Q0017	-	Mito:3951-4415	0	0	0	OK	1.21461	0	3.23984	OK	4.2987	1.46023	7.13718	OK	0	0	0	OK
Q0032	Q0032	-	Mito:11666-11957	0.195837	0	1.18759	OK	0	0	0	OK	0	0	0	OK	0	0	0	OK
Q0045	Q0045	COX1	Mito:13817-26701	0	0	0	HIDATA	0	0	0	HIDATA	0	0	0	HIDATA	5471.49	0	12671.1	OK
Q0050	Q0050	AI1	Mito:13817-26701	0	0	0	HIDATA	0	0	0	HIDATA	0	0	0	HIDATA	20107.8	9267.58	30948	OK
Q0055	Q0055	AI2	Mito:13817-26701	0	0	0	HIDATA	0	0	0	HIDATA	0	0	0	HIDATA	9539.17	1602.75	17475.6	OK
Q0060	Q0060	AI3	Mito:13817-26701	0	0	0	HIDATA	0	0	0	HIDATA	0	0	0	HIDATA	359.149	0	2483.7	OK
Q0065	Q0065	AI4	Mito:13817-26701	0	0	0	HIDATA	0	0	0	HIDATA	0	0	0	HIDATA	1783.11	0	5801.75	OK
Q0070	Q0070	AI5_ALPHA	Mito:13817-26701	0	0	0	HIDATA	0	0	0	HIDATA	0	0	0	HIDATA	433.732	0	2285.46	OK
Q0075	Q0075	AI5_BETA	Mito:13817-26701	0	0	0	HIDATA	0	0	0	HIDATA	0	0	0	HIDATA	110.813	0	1405.71	OK
Q0080	Q0080	ATP8	Mito:27665-27812	1.56953	0	3.84431	OK	1.32988	0	3.59318	OK	0	0	0	OK	6.0928	2.06688	10.1187	OK
Q0085	Q0085	ATP6	Mito:28486-29266	1651.19	1198.03	2104.34	OK	1168.77	838.703	1498.83	OK	2461.42	1724.54	3198.29	OK	2572.37	1819.38	3325.37	OK
Q0092	Q0092	-	Mito:30873-31014	0	0	0	OK	0	0	0	OK	0	0	0	OK	0	0	0	OK
Q0105	Q0105	COB	Mito:36539-43647	3787.68	1998.07	5577.29	OK	3010.95	1623.75	4398.15	OK	5720.33	3114.63	8326.02	OK	5754.29	3162.35	8346.24	OK
Q0110	Q0110	BI2	Mito:36539-43647	638.32	0	1337.99	OK	452.696	0	1019.16	OK	609.902	0	1407.96	OK	615.782	0	1418.91	OK
Q0115	Q0115	BI3	Mito:36539-43647	277.693	0	827.633	OK	247.358	0	581.575	OK	397.665	0	1080.29	OK	413.002	0	1062.75	OK
Q0120	Q0120	BI4	Mito:36539-43647	767.133	166.408	1367.86	OK	491.944	43.9496	939.937	OK	568.343	0	1186.85	OK	571.122	0	1201.32	OK
Q0130	Q0130	OLI1	Mito:46722-46953	28990.4	19885.9	38094.9	OK	24504.9	17067.3	31942.4	OK	32436.1	22227.4	42644.7	OK	36245.8	24703.8	47787.9	OK
Q0140	Q0140	VAR1	Mito:48900-50097	15.3345	11.2118	19.4573	OK	17.3389	12.7429	21.9349	OK	17.3409	12.7581	21.9238	OK	15.6423	11.4554	19.8292	OK
Q0142	Q0142	-	Mito:51051-51228	9.92822	0	23.98	OK	3.90228	0	7.9338	OK	1.56243	0	3.36294	OK	7.00904	0	17.7892	OK
Q0143	Q0143	-	Mito:51276-51429	28.3327	0	59.1736	OK	20.0977	0	44.0718	OK	19.8215	0	44.5701	OK	15.692	0	37.2937	OK
Q0144	Q0144	-	Mito:54108-54438	0	0	0	OK	0	0	0	OK	0	0	0	OK	0	0	0	OK
Q0160	Q0160	SCEI	Mito:58008-62447	0	0	0	HIDATA	0	0	0	HIDATA	0	0	0	HIDATA	0	0	0	HIDATA
Q0182	Q0182	-	Mito:65769-66179	39.5094	27.7957	51.2232	OK	33.1955	22.6388	43.7522	OK	20.1376	12.808	27.4673	OK	19.4887	12.2863	26.6912	OK
Q0250	Q0250	COX2	Mito:73757-75984	1400.34	1018.13	1782.56	OK	1096.56	803.645	1389.48	OK	1562.84	1131.92	1993.77	OK	1689.65	1220.12	2159.18	OK
Q0255	Q0255	-	Mito:73757-75984	20.6856	0	58.2575	OK	9.73976	0	29.0396	OK	18.8392	0	55.814	OK	17.5822	0	50.6298	OK
Q0275	Q0275	COX3	Mito:79212-80022	3586.95	2440.54	4733.37	OK	2996	2068.28	3923.72	OK	3343.01	2314.61	4371.42	OK	3493.34	2416.63	4570.04	OK
Q0297	Q0297	-	Mito:85294-85777	296.639	112.986	480.291	OK	337.685	25.2801	650.089	OK	469.777	0	949.243	OK	335.913	69.5141	602.311	OK
RDN18-1	RDN18-1	-	XII:451785-457732	0	0	0	HIDATA	0	0	0	HIDATA	0	0	0	HIDATA	0	0	0	HIDATA
RDN18-2	RDN18-2	-	XII:460922-466869	0	0	0	HIDATA	0	0	0	HIDATA	0	0	0	HIDATA	0	0	0	HIDATA
RDN25-1	RDN25-1	-	XII:451785-457732	0	0	0	HIDATA	0	0	0	HIDATA	0	0	0	HIDATA	0	0	0	HIDATA
RDN25-2	RDN25-2	-	XII:460922-466869	0	0	0	HIDATA	0	0	0	HIDATA	0	0	0	HIDATA	0	0	0	HIDATA
RDN37-1	RDN37-1	-	XII:451785-457732	0	0	0	HIDATA	0	0	0	HIDATA	0	0	0	HIDATA	0	0	0	HIDATA
RDN37-2	RDN37-2	-	XII:460922-466869	0	0	0	HIDATA	0	0	0	HIDATA	0	0	0	HIDATA	0	0	0	HIDATA
RDN5-1	RDN5-1	-	XII:459675-459796	0	0	0	OK	0	0	0	OK	0	0	0	OK	0	0	0	OK
RDN5-2	RDN5-2	-	XII:468812-468958	0	0	0	OK	0	0	0	OK	0	0	0	OK	0	0	0	OK
RDN5-3	RDN5-3	-	XII:472464-472610	0	0	0	OK	0	0	0	OK	0	0	0	OK	0	0	0	OK
RDN5-4	RDN5-4	-	XII:482044-482190	0	0	0	OK	0	0	0	OK	0	0	0	OK	0	0	0	OK
RDN5-5	RDN5-5	-	XII:485696-485842	0	0	0	OK	0	0	0	OK	0	0	0	OK	0	0	0	OK
RDN5-6	RDN5-6	-	XII:489348-489469	0	0	0	OK	0	0	0	OK	0	0	0	OK	0	0	0	OK
RDN58-1	RDN58-1	-	XII:451785-457732	0	0	0	HIDATA	0	0	0	HIDATA	0	0	0	HIDATA	0	0	0	HIDATA
RDN58-2	RDN58-2	-	XII:460922-466869	0	0	0	HIDATA	0	0	0	HIDATA	0	0	0	HIDATA	0	0	0	HIDATA
RNA170	RNA170	-	XIII:667287-667456	4.27972	0	16.0729	OK	12.4798	0	28.5488	OK	9.7231	0	22.6483	OK	32.747	8.46827	57.0257	OK
RPM1	RPM1	-	Mito:85294-85777	89.5229	65.7834	113.262	OK	87.4963	58.7613	116.231	OK	110.758	68.2828	153.234	OK	91.6002	63.3219	119.878	OK
RPR1	RPR1	-	V:117666-118035	1773.94	1345.45	2202.43	OK	2102.09	1577.71	2626.47	OK	2160.42	1628.05	2692.79	OK	3995.49	2879.23	5111.76	OK
RUF20	RUF20	-	VI:131060-131503	9.00067	4.6497	13.3516	OK	7.72051	3.76183	11.6792	OK	4.48173	1.50964	7.45382	OK	2.38693	0.214907	4.55895	OK
RUF21	RUF21	-	VI:57814-58521	0.087189	0	0.481227	OK	0.0431512	0	0.403112	OK	0	0	0	OK	0.139871	0	0.513902	OK
RUF22	RUF22	-	VI:199298-199813	0.133605	0	0.644942	OK	0	0	0	OK	0	0	0	OK	0	0	0	OK
RUF23	RUF23	-	VI:221713-221967	1.48172	0	3.72647	OK	2.15333	0	5.59839	OK	0.578788	0	1.7351	OK	1.49976	0	3.36463	OK
RUF5-1	RUF5-1	-	VIII:212408-213118	0	0	0	OK	0	0	0	OK	0	0	0	OK	0	0	0	OK
RUF5-2	RUF5-2	-	VIII:214406-215116	0	0	0	OK	0	0	0	OK	0	0	0	OK	0	0	0	OK
SCR1	SCR1	-	V:441986-442508	55692.8	26476.4	84909.1	OK	42288.9	23953.3	60624.6	OK	41326.1	23737.4	58914.7	OK	58280.3	28744.2	87816.5	OK
SRG1	SRG1	-	V:322211-324095	339.391	237.507	441.275	OK	259.073	187.19	330.956	OK	132.718	81.1824	184.253	OK	210.973	128.636	293.309	OK
TLC1	TLC1	-	II:307586-308887	1256.53	876.169	1636.89	OK	1032.91	740.645	1325.17	OK	1426.62	1001.7	1851.54	OK	1648.03	1153.71	2142.35	OK
YAL001C	YAL001C	TFC3	I:147593-151166	58.0419	44.8046	71.2793	OK	83.3686	63.863	102.874	OK	56.2994	43.5765	69.0222	OK	75.6655	58.177	93.154	OK
YAL002W	YAL002W	VPS8	I:143706-147531	27.105	21.0302	33.1798	OK	25.0021	19.4354	30.5687	OK	20.4503	15.8781	25.0224	OK	21.9667	17.0814	26.8521	OK
YAL003W	YAL003W	EFB1	I:142173-143160	1191.79	892.484	1491.09	OK	469.653	362.352	576.954	OK	723.291	551.252	895.329	OK	309.915	240.553	379.276	OK
YAL004W	YAL004W	-	I:139502-141431	0.207129	0	3.39173	OK	0.35821	0	9.79379	OK	0.273885	0	6.105	OK	0.156661	0	4.95254	OK
YAL005C	YAL005C	SSA1	I:139502-141431	259.485	195.73	323.24	OK	804.287	572.864	1035.71	OK	566.487	411.58	721.394	OK	679.521	488.346	870.697	OK
YAL007C	YAL007C	ERP2	I:137697-138345	59.5354	44.8644	74.2064	OK	49.6065	37.1814	62.0315	OK	57.1775	43.2278	71.1271	OK	41.5146	30.7995	52.2298	OK
YAL008W	YAL008W	FUN14	I:136913-137510	26.5273	18.8018	34.2528	OK	68.294	51.7401	84.8479	OK	44.5569	33.0318	56.082	OK	81.3058	62.0833	100.528	OK
YAL009W	YAL009W	SPO7	I:135853-136633	22.2529	16.0582	28.4476	OK	26.3136	19.266	33.3612	OK	22.7889	16.531	29.0468	OK	27.6998	20.3735	35.0262	OK
YAL010C	YAL010C	MDM10	I:134183-135665	15.7271	11.6851	19.7691	OK	18.7975	14.1182	23.4768	OK	15.0213	11.1503	18.8923	OK	17.8378	13.3661	22.3094	OK
YAL011W	YAL011W	SWC3	I:132198-134076	21.6638	16.555	26.7726	OK	16.4855	12.4602	20.5108	OK	17.966	13.6231	22.3089	OK	18.0539	13.7161	22.3916	OK
YAL012W	YAL012W	CYS3	I:130798-131983	91.7523	71.1589	112.346	OK	57.6793	44.6427	70.7159	OK	96.719	75.1044	118.334	OK	66.4696	51.5579	81.3813	OK
YAL013W	YAL013W	DEP1	I:129269-130487	28.855	21.9031	35.8068	OK	29.9134	22.7374	37.0894	OK	27.0432	20.4472	33.6391	OK	25.9549	19.5978	32.3121	OK
YAL014C	YAL014C	SYN8	I:128251-129019	35.022	26.002	44.0419	OK	43.2481	32.4946	54.0016	OK	35.9878	26.7602	45.2154	OK	45.1088	34.0715	56.146	OK
YAL015C	YAL015C	NTG1	I:126902-128102	14.3783	10.4672	18.2895	OK	20.3987	15.189	25.6084	OK	20.0427	14.8817	25.2038	OK	26.3716	19.9205	32.8227	OK
YAL016C-A	YAL016C-A	-	I:124754-126786	1.58812	0	9.91361	OK	1.60147	0	10.4225	OK	1.45664	0	7.63671	OK	0.479881	0	3.76085	OK
YAL016C-B	YAL016C-B	-	I:124306-124492	0	0	0	OK	0	0	0	OK	0	0	0	OK	0	0	0	OK
YAL016W	YAL016W	TPD3	I:124754-126786	75.3231	58.5124	92.1338	OK	84.3951	65.5087	103.281	OK	82.1559	63.7953	100.517	OK	82.8409	64.2774	101.404	OK
YAL017W	YAL017W	PSK1	I:120224-124295	40.8796	31.6073	50.1519	OK	106.518	80.5429	132.494	OK	58.7374	45.2826	72.1921	OK	96.0092	72.9004	119.118	OK
YAL018C	YAL018C	-	I:118563-119541	0.117446	0	0.388518	OK	0.0576738	0	0.312098	OK	0.0958776	0	0.350222	OK	0.686777	0	1.3882	OK
YAL019W	YAL019W	FUN30	I:114918-118314	64.652	49.7254	79.5787	OK	14.6299	11.2726	17.9872	OK	47.066	36.5197	57.6123	OK	19.6028	15.1832	24.0225	OK
YAL019W-A	YAL019W-A	-	I:113613-114819	1.36997	0	3.93053	OK	0.458541	0	1.58236	OK	1.03356	0	3.2586	OK	1.17865	0	3.34888	OK
YAL020C	YAL020C	ATS1	I:113613-114819	33.2558	25.0208	41.4909	OK	15.4694	11.1092	19.8297	OK	29.9846	22.5033	37.4658	OK	21.7204	15.9551	27.4857	OK
YAL021C	YAL021C	CCR4	I:110845-113359	36.5709	28.308	44.8338	OK	32.9257	25.5704	40.2809	OK	23.9664	18.5204	29.4125	OK	22.4676	17.3504	27.5848	OK
YAL022C	YAL022C	FUN26	I:108876-110430	65.9134	51.1305	80.6962	OK	76.8283	59.7225	93.934	OK	76.7332	59.6546	93.8118	OK	79.0589	61.4178	96.7001	OK
YAL023C	YAL023C	PMT2	I:106271-108551	330.371	244.527	416.215	OK	240.515	180.818	300.213	OK	255.055	191.169	318.94	OK	169.609	128.895	210.324	OK
YAL024C	YAL024C	LTE1	I:101564-105872	10.7534	8.20133	13.3056	OK	8.20669	6.24051	10.1729	OK	7.34652	5.56807	9.12497	OK	5.73592	4.30054	7.1713	OK
YAL025C	YAL025C	MAK16	I:100224-101145	74.2887	57.3474	91.23	OK	2.25459	0.93533	3.57385	OK	34.4124	25.877	42.9477	OK	6.17318	3.86493	8.48143	OK
YAL026C	YAL026C	DRS2	I:94686-99868	95.255	71.1341	119.376	OK	89.7909	67.364	112.218	OK	74.2542	56.0529	92.4554	OK	67.1623	50.7917	83.5329	OK
YAL026C-A	YAL026C-A	-	I:94686-99868	75.0776	0	158.3	OK	63.2038	0	139.65	OK	44.5253	0	98.2871	OK	43.2658	0	92.2033	OK
YAL027W	YAL027W	SAW1	I:94686-99868	13.9134	0	41.7777	OK	15.2004	0	39.7349	OK	13.544	0	34.0679	OK	15.8374	0	37.7871	OK
YAL028W	YAL028W	FRT2	I:92899-94486	4.75865	3.2067	6.3106	OK	9.78042	7.08372	12.4771	OK	11.1962	8.19319	14.1991	OK	15.5718	11.6256	19.518	OK
YAL029C	YAL029C	MYO4	I:87854-92270	83.8311	63.4102	104.252	OK	46.0544	35.5528	56.556	OK	60.0813	46.1604	74.0023	OK	41.6405	32.2786	51.0024	OK
YAL030W	YAL030W	SNC1	I:87285-87752	12.8929	6.57761	19.2081	OK	35.2364	23.742	46.7307	OK	15.2479	8.49827	21.9976	OK	29.1444	19.0783	39.2104	OK
YAL031C	YAL031C	GIP4	I:84668-87031	25.7041	19.7991	31.6091	OK	35.3165	27.4108	43.2222	OK	20.5879	15.8306	25.3452	OK	27.273	21.1011	33.445	OK
YAL031W-A	YAL031W-A	-	I:84668-87031	0.159519	0	1.46468	OK	0.202357	0	1.80137	OK	0	0	0	OK	0.720602	0	3.40806	OK
YAL032C	YAL032C	PRP45	I:83334-84474	13.4318	9.6586	17.205	OK	14.1871	10.2583	18.1159	OK	12.1793	8.70166	15.6569	OK	12.996	9.34515	16.6468	OK
YAL033W	YAL033W	POP5	I:82705-83227	34.5431	24.444	44.6423	OK	22.1106	15.2088	29.0124	OK	25.4585	17.9263	32.9906	OK	19.3718	13.1302	25.6135	OK
YAL034C	YAL034C	FUN19	I:80709-81951	7.7705	5.40666	10.1343	OK	11.8073	8.48233	15.1323	OK	12.133	8.73742	15.5285	OK	18.1433	13.4404	22.8461	OK
YAL034C-B	YAL034C-B	-	I:79488-80587	0.248592	0	1.20977	OK	0.121289	0	0.903243	OK	0.578792	0	1.90795	OK	0	0	0	OK
YAL034W-A	YAL034W-A	MTW1	I:79488-80587	9.82398	6.63957	13.0084	OK	9.89777	6.69955	13.096	OK	5.7984	3.55842	8.03839	OK	5.68053	3.4443	7.91676	OK
YAL035W	YAL035W	FUN12	I:76426-79435	212.697	157.648	267.746	OK	88.3234	67.8661	108.781	OK	155.037	117.075	192.999	OK	97.4953	74.7607	120.23	OK
YAL036C	YAL036C	RBG1	I:75042-76152	66.6444	51.5913	81.6976	OK	6.39639	4.21335	8.57943	OK	43.7274	33.5518	53.9029	OK	14.3803	10.3946	18.3659	OK
YAL037C-A	YAL037C-A	-	I:73425-73518	0	0	0	OK	0	0	0	OK	0	0	0	OK	0	0	0	OK
YAL037C-B	YAL037C-B	-	I:71785-73300	11.8095	0	114.373	OK	9.4366	0	94.5886	OK	6.38217	0	68.5976	OK	4.94079	0	51.9778	OK
YAL037W	YAL037W	-	I:74019-74823	11.5236	7.85882	15.1884	OK	20.6164	14.8467	26.3861	OK	14.6129	10.3059	18.9199	OK	15.7927	11.2486	20.3368	OK
YAL038W	YAL038W	CDC19	I:71785-73300	4250.51	2727.52	5773.5	OK	3799.6	2460.62	5138.57	OK	3174.88	2085.33	4264.44	OK	2542.65	1711.3	3374	OK
YAL039C	YAL039C	CYC3	I:68715-69525	17.145	12.1685	22.1215	OK	29.5854	21.9061	37.2647	OK	20.6125	14.8873	26.3378	OK	28.9677	21.4421	36.4933	OK
YAL040C	YAL040C	CLN3	I:65777-67520	11.8295	8.72024	14.9388	OK	6.24742	4.38291	8.11192	OK	24.0425	18.3618	29.7232	OK	14.0123	10.4357	17.5889	OK
YAL041W	YAL041W	CDC24	I:62839-65404	16.0201	12.2179	19.8222	OK	17.6605	13.5655	21.7556	OK	12.9512	9.83708	16.0654	OK	13.5504	10.3147	16.7862	OK
YAL042C-A	YAL042C-A	-	I:61230-62563	2.72272	0	17.216	OK	1.20697	0	10.321	OK	1.84418	0	13.6579	OK	1.73267	0	9.68581	OK
YAL042W	YAL042W	ERV46	I:61230-62563	282.675	215.219	350.13	OK	248.662	190.437	306.887	OK	273.886	209.319	338.454	OK	233.612	179.34	287.883	OK
YAL043C	YAL043C	PTA1	I:58694-61052	29.9972	23.2228	36.7717	OK	18.8956	14.5153	23.276	OK	24.6544	19.051	30.2579	OK	18.2401	13.9949	22.4853	OK
YAL044C	YAL044C	GCV3	I:57949-58462	111.902	85.0921	138.712	OK	187.782	144.983	230.581	OK	70.0379	52.4796	87.5962	OK	124.92	95.8416	153.999	OK
YAL044W-A	YAL044W-A	-	I:57487-57850	6.42663	1.8237	11.0296	OK	8.88605	3.5424	14.2297	OK	16.1657	8.74979	23.5817	OK	11.497	5.43085	17.5632	OK
YAL045C	YAL045C	-	I:57487-57850	0.682548	0	2.34078	OK	0	0	0	OK	0.384189	0	1.67681	OK	0	0	0	OK
YAL046C	YAL046C	AIM1	I:57028-57385	25.6134	16.2018	35.0249	OK	36.4716	24.6418	48.3013	OK	25.0907	15.8961	34.2852	OK	36.4106	24.7217	48.0996	OK
YAL047C	YAL047C	SPC72	I:54988-56857	14.8518	11.1449	18.5587	OK	16.6402	12.5772	20.7032	OK	15.9287	12.0244	19.8331	OK	18.1602	13.791	22.5294	OK
YAL047W-A	YAL047W-A	-	I:52800-54913	2.07442	0	8.38915	OK	1.86247	0	7.64953	OK	1.37403	0	5.13742	OK	1.51619	0	6.72894	OK
YAL048C	YAL048C	GEM1	I:52800-54913	30.8835	23.8464	37.9206	OK	31.6709	24.4831	38.8587	OK	30.0009	23.1721	36.8296	OK	31.0619	24.0144	38.1095	OK
YAL049C	YAL049C	AIM2	I:51854-52595	31.9228	23.5781	40.2676	OK	54.234	41.1883	67.2797	OK	33.3896	24.7483	42.0308	OK	44.8955	33.8282	55.9629	OK
YAL051W	YAL051W	OAF1	I:48563-51707	34.7575	27.0054	42.5097	OK	34.3298	26.6894	41.9701	OK	29.2795	22.7685	35.7906	OK	30.4022	23.6416	37.1629	OK
YAL053W	YAL053W	FLC2	I:45898-48250	49.7849	38.7057	60.8642	OK	79.1647	61.3913	96.938	OK	65.9204	51.1842	80.6566	OK	103.443	79.7537	127.132	OK
YAL054C	YAL054C	ACS1	I:42880-45022	1.27833	0.666428	1.89024	OK	8.73178	6.42555	11.038	OK	3.16836	2.1082	4.22852	OK	20.9994	16.1282	25.8706	OK
YAL055W	YAL055W	PEX22	I:42176-42719	13.2114	8.40498	18.0178	OK	22.5189	15.6564	29.3814	OK	18.7811	12.7976	24.7646	OK	21.9935	15.3243	28.6626	OK
YAL056C-A	YAL056C-A	-	I:37463-39046	0.898578	0	4.87651	OK	0.785556	0	4.09672	OK	0	0	0	OK	0.962917	0	4.77097	OK
YAL056W	YAL056W	GPB2	I:39258-41901	60.2452	46.7469	73.7435	OK	80.2432	62.0434	98.4431	OK	48.5461	37.7455	59.3467	OK	66.0054	51.1708	80.8399	OK
YAL058W	YAL058W	CNE1	I:37463-39046	44.1726	34.1768	54.1685	OK	35.4548	27.315	43.5947	OK	44.0024	34.0595	53.9453	OK	39.0184	30.1014	47.9353	OK
YAL059C-A	YAL059C-A	-	I:36495-37147	1.10579	0	3.84117	OK	0.124991	0	0.764786	OK	1.88801	0	4.71511	OK	0	0	0	OK
YAL059W	YAL059W	ECM1	I:36495-37147	52.1468	38.9498	65.3438	OK	3.31139	1.32804	5.29473	OK	29.1367	21.0151	37.2582	OK	5.47629	2.89589	8.0567	OK
YAL060W	YAL060W	BDH1	I:35154-36303	51.8341	39.8233	63.8448	OK	190.029	146.94	233.117	OK	84.1822	65.3613	103.003	OK	168.685	130.768	206.602	OK
YAL061W	YAL061W	BDH2	I:33447-34701	18.1225	13.4286	22.8163	OK	138.791	107.686	169.895	OK	41.796	32.148	51.444	OK	73.6333	57.2448	90.0218	OK
YAL062W	YAL062W	GDH3	I:31566-32940	7.15685	4.9381	9.37561	OK	126.347	98.0191	154.675	OK	11.7105	8.49645	14.9246	OK	157.276	121.675	192.876	OK
YAL063C	YAL063C	FLO9	I:23999-27968	0.629257	0.320109	0.938405	OK	1.03812	0.628074	1.44816	OK	0.772034	0.427036	1.11703	OK	0.797945	0.446164	1.14973	OK
YAL063C-A	YAL063C-A	-	I:22394-22685	1.11097	0	3.68232	OK	0.654988	0	2.45798	OK	1.70144	0	3.86217	OK	3.05368	0	6.89025	OK
YAL064C-A	YAL064C-A	TDA8	I:13362-13743	1.34861	0	3.23111	OK	0.380807	0	1.24367	OK	0.527329	0	1.53902	OK	1.48267	0	3.03597	OK
YAL064W	YAL064W	-	I:21565-21850	0.791196	0	2.69195	OK	0.423381	0	1.73818	OK	1.45551	0	3.28612	OK	0	0	0	OK
YAL064W-B	YAL064W-B	-	I:12045-12426	28.0722	18.535	37.6094	OK	21.6497	13.6105	29.6888	OK	31.2549	21.1732	41.3367	OK	22.6521	14.4579	30.8462	OK
YAL065C	YAL065C	-	I:11564-11951	0.324218	0	1.17281	OK	0.1451	0	0.854059	OK	1.33941	0	3.11291	OK	0.481484	0	1.5586	OK
YAL066W	YAL066W	-	I:10090-10399	0	0	0	OK	0.220594	0	1.14469	OK	0.519899	0	1.43755	OK	0	0	0	OK
YAL067C	YAL067C	SEO1	I:7234-9016	0.656797	0.174291	1.1393	OK	0.627938	0.168114	1.08776	OK	4.43074	3.01196	5.84951	OK	3.41394	2.20332	4.62456	OK
YAL067W-A	YAL067W-A	-	I:2479-2707	0	0	0	OK	0	0	0	OK	0	0	0	OK	0	0	0	OK
YAL068C	YAL068C	PAU8	I:1806-2169	0	0	0	OK	0	0	0	OK	0	0	0	OK	1.07344	0	2.50312	OK
YAL068W-A	YAL068W-A	-	I:334-792	0	0	0	OK	0	0	0	OK	0	0	0	OK	0.743235	0	2.05484	OK
YAL069W	YAL069W	-	I:334-792	0	0	0	OK	0.194763	0	1.09706	OK	0	0	0	OK	0	0	0	OK
YAR002C-A	YAR002C-A	ERP1	I:154064-154724	169.924	129.676	210.172	OK	125.244	96.5814	153.906	OK	176.169	136.803	215.535	OK	139.874	108.523	171.225	OK
YAR002W	YAR002W	NUP60	I:152256-153876	44.8528	34.7103	54.9952	OK	23.9933	18.3121	29.6745	OK	30.4222	23.411	37.4334	OK	21.8441	16.6115	27.0766	OK
YAR003W	YAR003W	SWD1	I:155004-156285	44.1349	34.0045	54.2653	OK	29.5547	22.5012	36.6082	OK	37.8268	29.0794	46.5741	OK	30.867	23.5398	38.1942	OK
YAR007C	YAR007C	RFA1	I:156753-158619	33.4666	25.8742	41.0589	OK	74.4624	57.9101	91.0148	OK	43.711	33.9423	53.4796	OK	68.1982	53.0281	83.3682	OK
YAR008W	YAR008W	SEN34	I:158965-159793	16.9583	12.0045	21.9121	OK	15.28	10.7974	19.7626	OK	10.8854	7.37571	14.3951	OK	13.4836	9.47371	17.4935	OK
YAR009C	YAR009C	-	I:160596-164187	4.37664	3.15756	5.59571	OK	4.18646	3.02847	5.34444	OK	10.7667	8.23029	13.3031	OK	7.98656	5.98075	9.99238	OK
YAR010C	YAR010C	-	I:164543-165866	0.31432	0	0.720663	OK	0.0533273	0	0.247365	OK	0.452886	0	0.947319	OK	0.483607	0	0.977534	OK
YAR014C	YAR014C	BUD14	I:166741-168871	58.8977	45.6423	72.1531	OK	31.8978	24.7152	39.0805	OK	43.532	33.8463	53.2178	OK	32.5671	25.2495	39.8847	OK
YAR015W	YAR015W	ADE1	I:169374-170295	147.829	114.823	180.835	OK	57.6026	44.286	70.9192	OK	69.1851	53.3979	84.9723	OK	55.7618	42.8489	68.6747	OK
YAR018C	YAR018C	KIN3	I:170395-171703	16.926	12.5449	21.307	OK	17.7559	13.1934	22.3185	OK	31.1451	23.7893	38.5008	OK	29.7265	22.6739	36.779	OK
YAR019C	YAR019C	CDC15	I:172210-175330	8.24342	6.14551	10.3413	OK	9.27744	6.97713	11.5778	OK	8.88415	6.67118	11.0971	OK	11.0826	8.40158	13.7637	OK
YAR019W-A	YAR019W-A	-	I:172210-175330	0.140809	0	0.985195	OK	0.190498	0	1.03599	OK	0	0	0	OK	0	0	0	OK
YAR020C	YAR020C	PAU7	I:176855-177023	3.5287	0	12.0603	OK	0.775365	0	2.70095	OK	3.62107	0	7.93265	OK	0	0	0	OK
YAR023C	YAR023C	-	I:179280-179820	18.8212	12.7335	24.909	OK	19.5671	13.3646	25.7696	OK	18.9786	12.8857	25.0715	OK	17.4589	11.7031	23.2147	OK
YAR027W	YAR027W	UIP3	I:183769-184477	37.1674	27.416	46.9189	OK	53.8291	40.7497	66.9085	OK	72.2191	55.3978	89.0404	OK	81.2864	62.5398	100.033	OK
YAR028W	YAR028W	-	I:184891-185596	52.5707	39.5005	65.6408	OK	48.1052	36.2008	60.0096	OK	56.7314	42.9685	70.4944	OK	53.0336	40.1652	65.9019	OK
YAR029W	YAR029W	-	I:186320-187732	19.8926	4.50804	35.2772	OK	7.16199	0	15.8728	OK	30.0057	3.08334	56.9281	OK	13.7604	0.993422	26.5273	OK
YAR030C	YAR030C	-	I:186320-187732	3.53725	0	8.52141	OK	0.642941	0	2.59069	OK	5.02583	0	12.0308	OK	1.23686	0	3.73355	OK
YAR031W	YAR031W	PRM9	I:186320-187732	8.95092	5.72153	12.1803	OK	7.59544	4.88944	10.3014	OK	13.8753	9.09836	18.6523	OK	11.1409	7.61758	14.6643	OK
YAR033W	YAR033W	MST28	I:188106-188811	12.0458	8.02689	16.0648	OK	11.5136	7.64489	15.3824	OK	14.06	9.63408	18.4859	OK	13.9979	9.60251	18.3933	OK
YAR035C-A	YAR035C-A	-	I:192336-192417	0	0	0	OK	0	0	0	OK	0	0	0	OK	0	0	0	OK
YAR035W	YAR035W	YAT1	I:190192-192256	2.81109	1.82012	3.80206	OK	6.07476	4.32728	7.82225	OK	2.94769	1.91543	3.97996	OK	7.76457	5.62598	9.90317	OK
YAR042W	YAR042W	SWH1	I:192618-196185	50.0159	38.4331	61.5988	OK	43.2105	33.4994	52.9216	OK	50.9759	39.5049	62.4468	OK	39.0679	30.3716	47.7641	OK
YAR047C	YAR047C	-	I:201466-201787	4.51196	0.570788	8.45312	OK	3.47173	0	7.09707	OK	4.22463	0.451122	7.99813	OK	2.26624	0	5.1002	OK
YAR050W	YAR050W	FLO1	I:203402-208016	2.66218	1.89407	3.43029	OK	0.982029	0.608287	1.35577	OK	3.61019	2.64137	4.57901	OK	2.2776	1.60327	2.95193	OK
YAR053W	YAR053W	-	I:208366-208663	0.714494	0	2.45661	OK	0.647709	0	1.88473	OK	0.775135	0	2.12778	OK	1.55795	0	3.41155	OK
YAR060C	YAR060C	-	I:217156-217492	0	0	0	OK	0	0	0	OK	0	0	0	OK	0	0	0	OK
YAR061W	YAR061W	-	I:218139-218343	0	0	0	OK	0	0	0	OK	0	0	0	OK	0	0	0	OK
YAR062W	YAR062W	-	I:218548-219145	0	0	0	OK	0	0	0	OK	0	0	0	OK	0	0	0	OK
YAR064W	YAR064W	-	I:220197-220497	0.342674	0	1.56821	OK	0	0	0	OK	0	0	0	OK	0	0	0	OK
YAR066W	YAR066W	-	I:221048-221660	0.219338	0	0.746043	OK	0.184989	0	0.65262	OK	0.173545	0	0.594538	OK	0	0	0	OK
YAR068W	YAR068W	-	I:222405-222891	0.0791302	0	0.625112	OK	0.100469	0	0.646796	OK	0	0	0	OK	0	0	0	OK
YAR069C	YAR069C	-	I:224010-224304	0	0	0	OK	0	0	0	OK	0	0	0	OK	0	0	0	OK
YAR070C	YAR070C	-	I:224562-224862	0.703602	0	1.92932	OK	0.546521	0	1.76342	OK	0	0	0	OK	0	0	0	OK
YAR071W	YAR071W	PHO11	I:225459-226863	5.14123	3.42176	6.8607	OK	4.25751	2.73942	5.7756	OK	12.5848	9.19819	15.9715	OK	5.12619	3.4188	6.83358	OK
YAR073W	YAR073W	IMD1	I:227741-229317	1.18599	0.369684	2.00229	OK	0.552213	0	1.11229	OK	3.20069	1.80813	4.59326	OK	3.47483	2.01347	4.93619	OK
YAR075W	YAR075W	-	I:227741-229317	1.11796	0	2.64177	OK	1.00282	0	2.52254	OK	2.35947	0	4.7853	OK	3.09703	0.530135	5.66392	OK
YBL001C	YBL001C	ECM15	II:237152-237467	147.43	109.309	185.551	OK	232.7	176.742	288.658	OK	190.254	144.4	236.107	OK	276.106	212.164	340.048	OK
YBL002W	YBL002W	HTB2	II:236491-236887	111.058	83.5543	138.562	OK	103.191	77.1576	129.225	OK	66.602	48.6963	84.5077	OK	43.4586	31.0503	55.8668	OK
YBL003C	YBL003C	HTA2	II:235393-235792	519.061	403.029	635.093	OK	572.528	445.201	699.855	OK	130.549	99.2285	161.869	OK	144.132	110.026	178.238	OK
YBL004W	YBL004W	UTP20	II:227635-235117	194.054	137.554	250.554	OK	16.8253	13.0309	20.6197	OK	112.644	82.648	142.64	OK	30.3902	23.4484	37.3321	OK
YBL005W	YBL005W	PDR3	II:217469-220400	22.407	17.3033	27.5106	OK	20.971	16.2157	25.7264	OK	15.3571	11.8044	18.9098	OK	14.3933	11.0442	17.7425	OK
YBL005W-A	YBL005W-A	-	II:221329-226598	9.23508	1.96709	16.5031	OK	11.969	3.85085	20.0872	OK	33.9536	12.405	55.5023	OK	29.0244	10.6878	47.3611	OK
YBL005W-B	YBL005W-B	-	II:221329-226598	15.3551	11.5308	19.1794	OK	19.0103	14.4241	23.5966	OK	42.8527	31.9556	53.7498	OK	38.0598	28.5201	47.5995	OK
YBL006C	YBL006C	LDB7	II:216586-217129	79.9156	60.4251	99.406	OK	67.1494	50.3897	83.9092	OK	55.3868	41.2616	69.5121	OK	59.0101	44.1223	73.8979	OK
YBL006W-A	YBL006W-A	-	II:216586-217129	2.88031	0	8.29759	OK	10.6018	0	42.6632	OK	0	0	0	OK	3.84286	0	8.63387	OK
YBL007C	YBL007C	SLA1	II:212631-216366	104.427	78.9646	129.888	OK	171.222	127.411	215.033	OK	101.23	77.0176	125.442	OK	112.282	85.1215	139.443	OK
YBL008W	YBL008W	HIR1	II:209652-212175	27.2811	21.1432	33.419	OK	24.0184	18.5638	29.473	OK	22.2101	17.1477	27.2725	OK	20.2067	15.5632	24.8502	OK
YBL008W-A	YBL008W-A	-	II:209408-209648	1.74779	0	4.20509	OK	0.897292	0	2.61718	OK	1.5683	0	3.96744	OK	0	0	0	OK
YBL009W	YBL009W	ALK2	II:207193-209224	30.0053	23.1841	36.8265	OK	16.9248	12.867	20.9826	OK	20.3614	15.5804	25.1423	OK	13.4753	10.1344	16.8163	OK
YBL010C	YBL010C	-	II:206106-206949	14.4372	10.2286	18.6458	OK	13.9249	9.76434	18.0854	OK	12.4579	8.6538	16.2621	OK	13.7368	9.68175	17.7918	OK
YBL011W	YBL011W	SCT1	II:203405-205817	108.74	83.7122	133.768	OK	90.6344	70.0705	111.198	OK	100.949	77.911	123.987	OK	80.2633	62.2171	98.3094	OK
YBL012C	YBL012C	-	II:203405-205817	1.42975	0	10.0192	OK	0.651243	0	5.87994	OK	0.873361	0	6.06777	OK	1.07839	0	7.2817	OK
YBL013W	YBL013W	FMT1	II:202055-203261	17.6336	13.0126	22.2545	OK	13.9942	10.1749	17.8136	OK	11.1509	7.9336	14.3683	OK	8.32548	5.81205	10.8389	OK
YBL014C	YBL014C	RRN6	II:199063-201748	62.2647	48.2949	76.2345	OK	29.3813	22.8138	35.9489	OK	42.6786	33.1892	52.168	OK	29.9808	23.2617	36.6998	OK
YBL015W	YBL015W	ACH1	II:194121-195702	25.3468	19.345	31.3485	OK	80.3513	62.4776	98.2249	OK	48.5671	37.6715	59.4627	OK	115.417	89.5003	141.335	OK
YBL016W	YBL016W	FUS3	II:192450-193512	43.2851	33.1661	53.4041	OK	19.5249	14.3757	24.6741	OK	26.6515	19.9941	33.309	OK	19.0527	14.022	24.0834	OK
YBL017C	YBL017C	PEP1	II:186843-191583	165.328	121.541	209.115	OK	166.113	122.226	210	OK	136.688	101.756	171.62	OK	141.086	104.915	177.257	OK
YBL018C	YBL018C	POP8	II:185997-186474	58.2014	41.9949	74.4078	OK	37.5277	26.3047	48.7507	OK	30.8846	21.1719	40.5972	OK	35.5878	24.8711	46.3045	OK
YBL019W	YBL019W	APN2	II:184352-185915	15.6964	11.7142	19.6786	OK	21.5446	16.3255	26.7637	OK	15.4941	11.5581	19.43	OK	20.9812	15.8978	26.0646	OK
YBL020W	YBL020W	RFT1	II:182400-184125	54.0541	41.8926	66.2156	OK	34.9074	26.9777	42.8371	OK	37.7811	29.2337	46.3285	OK	29.2248	22.4718	35.9778	OK
YBL021C	YBL021C	HAP3	II:181659-182094	19.5727	12.6005	26.5449	OK	18.0019	11.3501	24.6538	OK	14.9798	9.16638	20.7933	OK	13.7182	8.20725	19.2292	OK
YBL022C	YBL022C	PIM1	II:177873-181275	65.4589	50.3297	80.588	OK	112.756	85.5819	139.931	OK	87.3177	66.9278	107.708	OK	96.228	73.4978	118.958	OK
YBL023C	YBL023C	MCM2	II:174919-177526	41.3584	32.1416	50.5752	OK	46.1732	35.9008	56.4456	OK	43.8408	34.0737	53.6079	OK	40.9541	31.856	50.0522	OK
YBL024W	YBL024W	NCL1	II:172533-174588	77.1358	59.859	94.4127	OK	16.5027	12.5333	20.4721	OK	38.3191	29.7323	46.9058	OK	11.81	8.82639	14.7936	OK
YBL025W	YBL025W	RRN10	II:171480-171918	22.9731	15.2631	30.683	OK	18.0822	11.412	24.7524	OK	13.6541	8.20204	19.1062	OK	19.038	12.3022	25.7738	OK
YBL026W	YBL026W	LSM2	II:170622-171038	101.456	72.4599	130.452	OK	87.1128	62.0896	112.136	OK	85.0944	60.5757	109.613	OK	83.3537	59.4438	107.264	OK
YBL027W	YBL027W	RPL19B	II:168422-169376	1071.49	807.745	1335.23	OK	448.959	347.156	550.762	OK	572.084	440.65	703.518	OK	243.026	189.032	297.02	OK
YBL028C	YBL028C	-	II:167517-167838	150.224	112.275	188.172	OK	16.1609	8.47041	23.8514	OK	62.7279	44.3158	81.1401	OK	21.5293	12.6559	30.4026	OK
YBL029C-A	YBL029C-A	-	II:164487-164772	27.2199	15.8154	38.6244	OK	25.4681	14.4831	36.453	OK	45.741	30.2192	61.2628	OK	39.6874	25.477	53.8977	OK
YBL029W	YBL029W	-	II:166133-167264	3.25366	1.83338	4.67393	OK	2.12249	1.00721	3.23777	OK	3.69673	2.16738	5.22607	OK	5.49896	3.52314	7.47478	OK
YBL030C	YBL030C	PET9	II:163040-163997	164.182	127.281	201.082	OK	201.378	156.135	246.621	OK	202.49	157.015	247.964	OK	205.217	159.144	251.29	OK
YBL031W	YBL031W	SHE1	II:161698-162715	10.0958	7.04527	13.1464	OK	7.13583	4.71458	9.55708	OK	5.7309	3.63453	7.82727	OK	6.58732	4.30012	8.87452	OK
YBL032W	YBL032W	HEK2	II:160183-161329	72.2093	55.8749	88.5437	OK	84.4852	65.5921	103.378	OK	49.1149	37.8577	60.3721	OK	46.5404	35.8455	57.2354	OK
YBL033C	YBL033C	RIB1	II:158655-159693	30.2112	22.7707	37.6516	OK	37.9342	28.8938	46.9745	OK	29.4711	22.1823	36.7599	OK	32.0443	24.2367	39.8519	OK
YBL034C	YBL034C	STU1	II:153847-158389	17.9566	13.8474	22.0658	OK	15.9186	12.3336	19.5037	OK	12.0845	9.3283	14.8406	OK	10.4559	8.05222	12.8596	OK
YBL035C	YBL035C	POL12	II:151492-153610	26.3536	20.2857	32.4215	OK	19.7286	15.1141	24.3431	OK	13.3688	10.072	16.6655	OK	11.0216	8.21464	13.8286	OK
YBL036C	YBL036C	-	II:150446-151220	98.6533	76.3375	120.969	OK	81.6549	62.9879	100.322	OK	94.4064	73.0599	115.753	OK	82.2635	63.494	101.033	OK
YBL037W	YBL037W	APL3	II:147208-150286	24.8748	19.2982	30.4515	OK	25.2032	19.5636	30.8428	OK	21.8015	16.8974	26.7055	OK	23.7538	18.4285	29.0792	OK
YBL038W	YBL038W	MRPL16	II:146186-146885	26.4259	19.0869	33.7648	OK	40.1555	29.8894	50.4216	OK	28.7704	21.0073	36.5335	OK	41.5338	31.0262	52.0413	OK
YBL039C	YBL039C	URA7	II:143988-145728	158.624	121.959	195.289	OK	4.06372	2.69549	5.43195	OK	88.7508	68.9578	108.544	OK	10.2468	7.49988	12.9937	OK
YBL039C-A	YBL039C-A	-	II:143988-145728	0	0	0	OK	0	0	0	OK	0	0	0	OK	0	0	0	OK
YBL039W-B	YBL039W-B	-	II:143392-143572	4.0848	0	13.4467	OK	6.73366	1.93508	11.5322	OK	2.85069	0	6.68013	OK	17.0854	1.52298	32.6479	OK
YBL040C	YBL040C	ERD2	II:142111-142868	126.305	96.6963	155.914	OK	112.046	86.4457	137.646	OK	130.939	101.406	160.471	OK	137.967	107.005	168.929	OK
YBL041W	YBL041W	PRE7	II:141246-141972	73.0834	55.9369	90.2299	OK	108.789	84.1148	133.462	OK	114.426	88.6582	140.193	OK	110.291	85.4594	135.123	OK
YBL042C	YBL042C	FUI1	II:138340-140260	78.7745	61.1603	96.3887	OK	14.8336	11.162	18.5052	OK	46.6734	36.2967	57.05	OK	25.8223	19.8726	31.7719	OK
YBL043W	YBL043W	ECM13	II:136687-137461	12.454	8.53162	16.3764	OK	12.8455	8.8506	16.8404	OK	22.9755	16.6682	29.2828	OK	4.61172	2.50067	6.72277	OK
YBL044W	YBL044W	-	II:135997-136366	0.116589	0	0.864946	OK	0.270457	0	1.17334	OK	0.278356	0	1.0207	OK	0	0	0	OK
YBL045C	YBL045C	COR1	II:134142-135516	76.2131	59.244	93.1822	OK	133.776	103.73	163.822	OK	87.2337	67.8333	106.634	OK	134.77	104.51	165.03	OK
YBL046W	YBL046W	PSY4	II:132423-133749	30.2356	23.0911	37.3802	OK	23.8881	18.0505	29.7258	OK	30.4581	23.2719	37.6443	OK	25.6352	19.4458	31.8246	OK
YBL047C	YBL047C	EDE1	II:127894-132040	69.8426	53.0821	86.603	OK	122.463	91.9238	153.003	OK	92.8001	70.4559	115.144	OK	97.2608	73.7057	120.816	OK
YBL048W	YBL048W	RRT1	II:127298-127610	1.61868	0	4.34793	OK	8.97621	3.12126	14.8312	OK	8.11564	2.68638	13.5449	OK	11.0343	4.689	17.3795	OK
YBL049W	YBL049W	MOH1	II:126827-127244	4.11067	1.01516	7.20619	OK	27.0607	18.2368	35.8846	OK	18.4186	11.5127	25.3246	OK	34.1104	23.9002	44.3206	OK
YBL050W	YBL050W	SEC17	II:125124-126119	49.9465	38.0944	61.7985	OK	88.9976	68.8899	109.105	OK	65.4137	50.3969	80.4306	OK	88.9678	68.9331	109.003	OK
YBL051C	YBL051C	PIN4	II:122752-124759	21.6934	16.5549	26.8319	OK	19.4843	14.8765	24.0921	OK	24.9704	19.2049	30.7358	OK	21.0771	16.1595	25.9948	OK
YBL052C	YBL052C	SAS3	II:119334-121874	54.9765	42.5319	67.4212	OK	39.3352	30.507	48.1633	OK	30.6305	23.6758	37.5853	OK	25.9117	19.9949	31.8286	OK
YBL053W	YBL053W	-	II:119334-121874	11.7619	0	33.3073	OK	8.32154	0	22.1159	OK	7.66117	0	21.4998	OK	8.23734	0	19.2286	OK
YBL054W	YBL054W	TOD6	II:117588-119166	13.3399	9.84753	16.8323	OK	0.980719	0.358113	1.60332	OK	10.679	7.77438	13.5836	OK	1.87584	1.00028	2.75141	OK
YBL055C	YBL055C	-	II:115572-116829	41.8379	32.2071	51.4686	OK	14.2759	10.4185	18.1333	OK	33.7223	25.7966	41.648	OK	26.6832	20.2212	33.1451	OK
YBL056W	YBL056W	PTC3	II:113761-115168	131.016	101.571	160.46	OK	168.127	129.835	206.42	OK	154.557	119.505	189.608	OK	169.361	130.624	208.097	OK
YBL057C	YBL057C	PTH2	II:112800-113427	78.9785	59.9865	97.9705	OK	55.4633	41.7377	69.1889	OK	50.9228	38.1798	63.6657	OK	45.6367	34.0156	57.2578	OK
YBL058W	YBL058W	SHP1	II:111436-112708	100.474	78.1238	122.825	OK	136.911	106.247	167.575	OK	154.499	119.81	189.187	OK	152.656	118.324	186.989	OK
YBL059C-A	YBL059C-A	CMC2	II:110124-110539	34.7086	22.7272	46.69	OK	54.7015	38.1447	71.2584	OK	32.8843	21.4721	44.2965	OK	61.5444	43.5371	79.5517	OK
YBL059W	YBL059W	-	II:110593-111244	12.6547	8.13762	17.1717	OK	13.8351	9.05335	18.617	OK	14.7616	9.8015	19.7217	OK	13.8681	9.11095	18.6252	OK
YBL060W	YBL060W	YEL1	II:107931-109995	25.6715	19.7971	31.546	OK	18.6529	14.2351	23.0707	OK	24.5915	18.9389	30.2441	OK	23.7629	18.2958	29.2301	OK
YBL061C	YBL061C	SKT5	II:105307-107406	42.9561	33.3485	52.5636	OK	39.0813	30.3329	47.8297	OK	36.632	28.3944	44.8697	OK	41.5926	32.3279	50.8574	OK
YBL062W	YBL062W	-	II:105307-107406	3.05828	0	10.82	OK	1.83342	0	7.56041	OK	2.10028	0	7.95252	OK	1.17816	0	5.85501	OK
YBL063W	YBL063W	KIP1	II:101885-105221	36.1931	28.038	44.3482	OK	44.1806	34.267	54.0941	OK	32.6436	25.3824	39.9048	OK	35.5714	27.6598	43.4831	OK
YBL064C	YBL064C	PRX1	II:100370-101156	24.7613	18.037	31.4856	OK	83.2113	64.1796	102.243	OK	51.7238	39.3729	64.0746	OK	89.241	68.9733	109.509	OK
YBL065W	YBL065W	-	II:96668-100307	0.400718	0	2.64988	OK	0.290729	0	1.69366	OK	0.421846	0	1.81699	OK	2.16682	0	6.81268	OK
YBL066C	YBL066C	SEF1	II:96668-100307	9.06949	6.83404	11.3049	OK	8.5001	6.40878	10.5914	OK	10.3112	7.853	12.7694	OK	8.74806	6.60741	10.8887	OK
YBL067C	YBL067C	UBP13	II:93638-95882	28.9048	22.3747	35.4349	OK	20.3328	15.6245	25.0411	OK	20.9054	16.0723	25.7385	OK	18.7919	14.4007	23.1831	OK
YBL068W	YBL068W	PRS4	II:92413-93394	32.3675	24.3135	40.4215	OK	6.27359	4.00512	8.54206	OK	17.3263	12.5648	22.0877	OK	10.1923	7.07988	13.3047	OK
YBL068W-A	YBL068W-A	-	II:90604-92030	0	0	0	OK	0	0	0	OK	0.777857	0	6.24006	OK	0.613457	0	4.43578	OK
YBL069W	YBL069W	AST1	II:90604-92030	80.3612	62.281	98.4413	OK	36.9893	28.398	45.5806	OK	52.3602	40.4847	64.2358	OK	25.7845	19.5245	32.0445	OK
YBL070C	YBL070C	-	II:90604-92030	0.450275	0	3.3812	OK	0	0	0	OK	0	0	0	OK	0	0	0	OK
YBL071C	YBL071C	-	II:89977-90531	1.65686	0	4.87	OK	0.15639	0	1.07425	OK	1.10167	0	3.0789	OK	0.497883	0	1.54611	OK
YBL071C-B	YBL071C-B	-	II:89457-89556	0	0	0	OK	0	0	0	OK	0	0	0	OK	0	0	0	OK
YBL071W-A	YBL071W-A	KTI11	II:89977-90531	10.5805	2.31972	18.8413	OK	2.89544	0	7.31809	OK	12.5996	3.84773	21.3514	OK	8.12306	1.29438	14.9517	OK
YBL072C	YBL072C	RPS8A	II:88522-89125	522.172	398.647	645.697	OK	241.048	187.064	295.032	OK	321.601	249.807	393.395	OK	185.179	143.936	226.422	OK
YBL073W	YBL073W	-	II:86721-87957	0	0	0	OK	0	0	0	OK	0	0	0	OK	0	0	0	OK
YBL074C	YBL074C	AAR2	II:86721-87957	39.1015	29.8592	48.3438	OK	25.8634	19.3703	32.3564	OK	29.4485	22.2084	36.6887	OK	24.9688	18.6632	31.2745	OK
YBL075C	YBL075C	SSA3	II:84498-86448	33.579	25.9776	41.1804	OK	27.9742	21.5845	34.3639	OK	35.0573	27.1672	42.9474	OK	36.8994	28.6147	45.1841	OK
YBL076C	YBL076C	ILS1	II:80896-84261	441.069	314.512	567.627	OK	247.926	182.749	313.103	OK	365.797	263.701	467.893	OK	235.085	173.784	296.387	OK
YBL077W	YBL077W	-	II:80896-84261	6.76627	0	59.9202	OK	4.21202	0	33.1072	OK	5.91911	0	50.0799	OK	3.66053	0	28.8232	OK
YBL078C	YBL078C	ATG8	II:80377-80731	18.659	10.9244	26.3936	OK	86.9792	63.8259	110.133	OK	48.389	34.2109	62.5671	OK	102.741	76.348	129.135	OK
YBL079W	YBL079W	NUP170	II:75258-79767	88.3732	66.8828	109.864	OK	54.5597	42.0105	67.1089	OK	53.6568	41.315	65.9986	OK	44.3519	34.3057	54.3981	OK
YBL080C	YBL080C	PET112	II:73069-74695	17.1606	12.8883	21.433	OK	31.2634	24.0699	38.457	OK	20.6934	15.6966	25.6902	OK	31.1917	24.0247	38.3588	OK
YBL081W	YBL081W	-	II:71865-72972	8.11376	5.54206	10.6854	OK	1.67458	0.676289	2.67287	OK	7.70541	5.22749	10.1833	OK	3.32756	1.88451	4.77061	OK
YBL082C	YBL082C	ALG3	II:69712-71127	35.1775	26.4883	43.8668	OK	19.6412	14.2966	24.9859	OK	31.9872	23.8115	40.163	OK	24.2058	17.9687	30.4429	OK
YBL083C	YBL083C	-	II:69712-71127	19.7001	4.36241	35.0378	OK	12.0884	0.343216	23.8335	OK	24.4154	7.65366	41.1772	OK	7.9335	0	18.992	OK
YBL084C	YBL084C	CDC27	II:67168-69445	17.4402	13.3133	21.5671	OK	15.4494	11.7518	19.1469	OK	17.0617	13.0357	21.0876	OK	14.2772	10.8317	17.7227	OK
YBL085W	YBL085W	BOI1	II:63875-66818	25.3361	19.5105	31.1617	OK	28.6445	22.2449	35.044	OK	17.7653	13.692	21.8386	OK	18.8656	14.5693	23.1618	OK
YBL086C	YBL086C	-	II:61201-62602	19.0585	14.2582	23.8588	OK	26.345	20.0504	32.6395	OK	22.5545	17.0454	28.0637	OK	23.0382	17.4378	28.6386	OK
YBL087C	YBL087C	RPL23A	II:59821-60739	916.783	689.75	1143.82	OK	277.592	214.491	340.694	OK	443.619	344.878	542.36	OK	198.372	152.928	243.817	OK
YBL088C	YBL088C	TEL1	II:51018-59382	56.085	41.9827	70.1872	OK	42.902	32.5443	53.2597	OK	45.5474	34.5851	56.5097	OK	43.2924	32.9787	53.6062	OK
YBL089W	YBL089W	AVT5	II:49573-50953	25.2059	19.104	31.3077	OK	24.5354	18.5868	30.4841	OK	22.5461	17.0188	28.0734	OK	24.8606	18.8638	30.8574	OK
YBL090W	YBL090W	MRP21	II:48824-49358	20.2181	13.8051	26.6311	OK	29.019	20.5721	37.466	OK	22.1238	15.3315	28.9162	OK	40.8891	29.8232	51.955	OK
YBL091C	YBL091C	MAP2	II:47362-48628	101.832	79.1734	124.491	OK	134.656	104.534	164.777	OK	96.0381	74.6572	117.419	OK	117.202	91.1487	143.256	OK
YBL091C-A	YBL091C-A	SCS22	II:46564-47180	4.32825	1.7336	6.92289	OK	14.8762	9.6122	20.1401	OK	6.74096	3.49588	9.98604	OK	13.0058	8.20348	17.8081	OK
YBL092W	YBL092W	RPL32	II:45977-46370	809.523	624.531	994.514	OK	347.642	269.449	425.834	OK	546.791	425.01	668.573	OK	240.277	185.828	294.727	OK
YBL093C	YBL093C	ROX3	II:44255-44918	27.24	19.6913	34.7886	OK	27.3981	19.8026	34.9935	OK	27.9016	20.2364	35.5669	OK	26.5915	19.1881	33.9949	OK
YBL094C	YBL094C	-	II:43173-44097	0.137793	0	0.982156	OK	0.636555	0	3.396	OK	1.21252	0	4.66158	OK	0	0	0	OK
YBL095W	YBL095W	-	II:43173-44097	38.7968	29.1599	48.4336	OK	41.2739	31.1038	51.444	OK	38.5363	28.9367	48.136	OK	39.6949	29.7716	49.6182	OK
YBL096C	YBL096C	-	II:43173-44097	0.332673	0	1.99067	OK	0.579341	0	3.34218	OK	0.358743	0	1.64921	OK	0.720602	0	2.75213	OK
YBL097W	YBL097W	BRN1	II:40830-43095	64.071	49.5568	78.5851	OK	56.7115	44.0783	69.3447	OK	55.0431	42.7853	67.3009	OK	54.7943	42.603	66.9856	OK
YBL098W	YBL098W	BNA4	II:39144-40527	25.1956	19.0996	31.2916	OK	18.4131	13.7323	23.0939	OK	17.1283	12.7508	21.5058	OK	15.9016	11.6955	20.1076	OK
YBL099W	YBL099W	ATP1	II:36988-38690	84.1173	65.3402	102.894	OK	124.714	96.3135	153.114	OK	152.584	117.619	187.549	OK	155.233	119.417	191.05	OK
YBL100C	YBL100C	-	II:36988-38690	0.153503	0	1.71573	OK	0.150639	0	1.94493	OK	0.500647	0	4.3058	OK	0	0	0	OK
YBL100W-A	YBL100W-A	-	II:29934-35248	0	0	0	OK	0	0	0	OK	0	0	0	OK	0	0	0	OK
YBL100W-B	YBL100W-B	-	II:29934-35248	2.71061	1.94902	3.4722	OK	2.44085	1.75124	3.13045	OK	4.6541	3.4877	5.82051	OK	3.58281	2.64265	4.52298	OK
YBL100W-C	YBL100W-C	-	II:28426-28546	5.4622	2.57407	8.35033	OK	7.37084	4.48361	10.2581	OK	0	0	0	OK	0	0	0	OK
YBL101C	YBL101C	ECM21	II:24945-28299	10.2592	7.78534	12.733	OK	16.4296	12.6654	20.1938	OK	15.3361	11.8211	18.8511	OK	15.8155	12.1882	19.4428	OK
YBL102W	YBL102W	SFT2	II:24097-24745	55.0141	41.3144	68.7137	OK	74.3713	56.7324	92.0103	OK	76.2482	58.3762	94.1202	OK	92.6248	71.3072	113.943	OK
YBL103C	YBL103C	RTG3	II:22075-23536	22.9875	17.4071	28.5678	OK	26.3024	20.0626	32.5422	OK	19.7877	14.8982	24.6772	OK	23.0079	17.4533	28.5625	OK
YBL104C	YBL104C	SEA4	II:18176-21293	38.0766	29.5845	46.5687	OK	34.7247	27.0046	42.4448	OK	27.2535	21.1749	33.3321	OK	28.3485	22.044	34.653	OK
YBL105C	YBL105C	PKC1	II:14240-17696	70.9953	54.4787	87.5119	OK	71.4804	55.0221	87.9387	OK	57.5116	44.4867	70.5364	OK	61.1921	47.3135	75.0707	OK
YBL106C	YBL106C	SRO77	II:10846-13879	14.7925	11.3324	18.2526	OK	10.354	7.84965	12.8584	OK	15.518	11.9134	19.1226	OK	10.7903	8.19062	13.3901	OK
YBL107C	YBL107C	-	II:9960-10551	24.5925	17.4502	31.7349	OK	29.2593	20.9698	37.5488	OK	25.9695	18.5072	33.4319	OK	28.4603	20.3758	36.5449	OK
YBL107W-A	YBL107W-A	-	II:9267-9372	0	0	0	OK	0	0	0	OK	0	0	0	OK	0	0	0	OK
YBL108C-A	YBL108C-A	PAU9	II:7604-7733	0	0	0	OK	0	0	0	OK	0	0	0	OK	0	0	0	OK
YBL108W	YBL108W	-	II:8176-8482	0	0	0	OK	0	0	0	OK	0	0	0	OK	0	0	0	OK
YBL109W	YBL109W	-	II:5789-6125	0.429765	0	1.46631	OK	0.515908	0	1.35178	OK	0.771219	0	2.21079	OK	0	0	0	OK
YBL111C	YBL111C	-	II:2906-5009	0.800192	0.304782	1.2956	OK	0.734704	0.256302	1.21311	OK	0.853117	0.343559	1.36268	OK	0.897533	0.372632	1.42243	OK
YBL112C	YBL112C	-	II:279-2899	0.30798	0	1.56932	OK	0.547391	0	3.91783	OK	1.32273	0	4.80113	OK	0	0	0	OK
YBL113C	YBL113C	-	II:279-2899	21.2434	16.2959	26.1908	OK	26.1461	20.2204	32.0717	OK	22.1018	17.0383	27.1653	OK	24.0242	18.5489	29.4996	OK
YBL113W-A	YBL113W-A	-	II:279-2899	0.233268	0	1.49538	OK	0.247707	0	1.65443	OK	0	0	0	OK	0	0	0	OK
YBR001C	YBR001C	NTH2	II:238940-241283	26.446	20.4629	32.429	OK	40.8125	31.7355	49.8895	OK	30.9184	23.9801	37.8568	OK	38.0276	29.5557	46.4995	OK
YBR002C	YBR002C	RER2	II:241707-242568	15.474	10.9597	19.9884	OK	5.56389	3.33545	7.79232	OK	10.8858	7.45829	14.3134	OK	7.1363	4.53877	9.73382	OK
YBR003W	YBR003W	COQ1	II:242808-244230	26.8115	20.437	33.1861	OK	36.4381	28.0419	44.8343	OK	29.0692	22.2336	35.9049	OK	38.4663	29.6185	47.314	OK
YBR004C	YBR004C	GPI18	II:244365-245667	25.6783	19.3985	31.9581	OK	15.3805	11.3179	19.4431	OK	25.2014	19.0656	31.3372	OK	20.1644	15.0929	25.236	OK
YBR005W	YBR005W	RCR1	II:245905-246547	26.4199	18.9276	33.9121	OK	40.7794	30.1888	51.37	OK	46.0859	34.4058	57.7661	OK	56.7832	42.8885	70.678	OK
YBR006W	YBR006W	UGA2	II:247009-248503	14.6324	10.8316	18.4332	OK	93.6966	72.8621	114.531	OK	48.0314	37.2138	58.8489	OK	122.068	94.6279	149.507	OK
YBR007C	YBR007C	DSF2	II:248805-251016	9.98672	7.40567	12.5678	OK	14.3597	10.8719	17.8474	OK	9.73796	7.22578	12.2501	OK	11.1624	8.35126	13.9736	OK
YBR008C	YBR008C	FLR1	II:252562-254209	37.8583	29.2732	46.4434	OK	28.3756	21.7806	34.9707	OK	27.5186	21.1189	33.9182	OK	22.413	17.0802	27.7458	OK
YBR009C	YBR009C	HHF1	II:255372-255684	938.154	728.676	1147.63	OK	816.521	634.849	998.193	OK	354.399	273.983	434.815	OK	333.214	257.262	409.166	OK
YBR010W	YBR010W	HHT1	II:256330-256741	1058.58	805.15	1312.01	OK	1003.27	769.985	1236.55	OK	484.074	376.396	591.752	OK	526.527	408.379	644.675	OK
YBR011C	YBR011C	IPP1	II:257111-257975	139.784	108.705	170.863	OK	164.291	127.624	200.959	OK	146.267	113.701	178.833	OK	139.983	108.845	171.12	OK
YBR012C	YBR012C	-	II:259146-259566	6.62093	2.81761	10.4242	OK	10.4719	5.60731	15.3364	OK	13.5624	8.03786	19.0869	OK	20.6237	13.375	27.8723	OK
YBR012W-A	YBR012W-A	-	II:259868-265140	0.150779	0	0.557123	OK	1.71007	0	3.77396	OK	6.52589	2.78809	10.2637	OK	8.00498	3.87575	12.1342	OK
YBR012W-B	YBR012W-B	-	II:259868-265140	1.385	0.928632	1.84138	OK	1.44038	0.819243	2.06152	OK	4.62824	3.27056	5.98591	OK	3.89643	2.60745	5.18541	OK
YBR013C	YBR013C	-	II:265491-265881	12.4589	6.73776	18.18	OK	21.0994	13.2481	28.9507	OK	27.2215	18.1237	36.3192	OK	29.4287	19.8857	38.9716	OK
YBR014C	YBR014C	GRX7	II:266724-267336	66.0776	49.9378	82.2175	OK	72.4628	55.1446	89.7809	OK	72.4182	55.1471	89.6892	OK	65.8016	49.9134	81.6898	OK
YBR015C	YBR015C	MNN2	II:267709-269503	131.241	101.323	161.159	OK	87.6785	68.0973	107.26	OK	103.923	80.5621	127.285	OK	72.6594	56.4966	88.8221	OK
YBR016W	YBR016W	-	II:270246-270633	10.438	5.25517	15.6208	OK	15.1106	8.78864	21.4325	OK	14.3739	8.28128	20.4664	OK	17.5895	10.6792	24.4998	OK
YBR017C	YBR017C	KAP104	II:270946-273703	70.5606	54.637	86.4842	OK	32.2094	25.0449	39.3739	OK	48.2049	37.481	58.9289	OK	28.0489	21.7647	34.333	OK
YBR018C	YBR018C	GAL7	II:274426-275527	0.926055	0.171895	1.68022	OK	2.19732	1.04631	3.34834	OK	1.45816	0.525108	2.39121	OK	1.90952	0.823918	2.99511	OK
YBR019C	YBR019C	GAL10	II:276252-278352	0.443702	0.0790027	0.8084	OK	0.667762	0.22963	1.10589	OK	0.57515	0.173532	0.976768	OK	0.642193	0.205857	1.07853	OK
YBR020W	YBR020W	GAL1	II:279020-280607	13.1225	9.65619	16.5888	OK	8.45672	6.0433	10.8701	OK	11.0528	8.07701	14.0286	OK	8.26468	5.90009	10.6293	OK
YBR021W	YBR021W	FUR4	II:281442-283344	11.9467	8.88536	15.0081	OK	1.14228	0.536911	1.74765	OK	9.75569	7.17253	12.3389	OK	2.24264	1.34882	3.13645	OK
YBR022W	YBR022W	POA1	II:283737-284271	25.0837	17.5065	32.6609	OK	41.4836	30.2218	52.7454	OK	20.3159	13.8479	26.7839	OK	39.0535	28.4022	49.7048	OK
YBR023C	YBR023C	CHS3	II:284427-287925	125.105	94.6627	155.548	OK	100.835	76.8387	124.832	OK	137.57	103.762	171.378	OK	112.859	85.6994	140.019	OK
YBR024W	YBR024W	SCO2	II:289444-290350	13.2047	9.34241	17.067	OK	24.4925	18.0845	30.9005	OK	21.7216	15.8993	27.5439	OK	30.8338	23.0817	38.5859	OK
YBR025C	YBR025C	OLA1	II:290680-291865	247.722	190.386	305.058	OK	108.993	84.7453	133.241	OK	198.079	153.143	243.015	OK	114.326	88.8775	139.774	OK
YBR026C	YBR026C	ETR1	II:292876-294019	37.3163	28.493	46.1396	OK	121.807	94.7106	148.904	OK	74.4011	57.7579	91.0443	OK	127.633	99.2557	156.01	OK
YBR027C	YBR027C	-	II:294023-294356	0.149664	0	0.994294	OK	0.271148	0	1.11127	OK	0.311905	0	1.14736	OK	0.432676	0	1.35318	OK
YBR028C	YBR028C	YPK3	II:294424-296002	26.5772	20.3343	32.8201	OK	21.642	16.4302	26.8537	OK	19.8819	15.0367	24.7271	OK	15.6955	11.7244	19.6667	OK
YBR029C	YBR029C	CDS1	II:296368-297742	39.995	30.8365	49.1535	OK	22.1933	16.7413	27.6454	OK	47.2268	36.5204	57.9331	OK	25.8586	19.6522	32.065	OK
YBR030W	YBR030W	RKM3	II:298291-299950	34.342	26.513	42.1709	OK	12.3297	9.10828	15.5512	OK	22.4251	17.0938	27.7565	OK	13.8028	10.2675	17.338	OK
YBR031W	YBR031W	RPL4A	II:300165-301254	258.919	199.127	318.712	OK	106.084	82.4038	129.764	OK	163.377	126.766	199.988	OK	81.9481	63.6354	100.261	OK
YBR032W	YBR032W	-	II:301518-301821	4.3496	0.254624	8.44457	OK	0	0	0	OK	2.2256	0	5.41418	OK	0	0	0	OK
YBR033W	YBR033W	EDS1	II:301943-304703	1.0795	0.583033	1.57596	OK	4.13942	2.94414	5.33469	OK	2.85395	1.95017	3.75773	OK	4.67894	3.36042	5.99746	OK
YBR034C	YBR034C	HMT1	II:304929-305976	65.4913	50.6492	80.3334	OK	11.854	8.40849	15.2996	OK	38.4003	29.2947	47.506	OK	17.8855	13.0868	22.6842	OK
YBR035C	YBR035C	PDX3	II:306268-306955	38.9522	28.8584	49.0461	OK	97.2165	74.7933	119.64	OK	72.2109	55.3254	89.0963	OK	102.035	78.7605	125.31	OK
YBR036C	YBR036C	CSG2	II:309080-310313	107.133	82.9854	131.281	OK	119.002	92.3878	145.615	OK	116.455	90.4813	142.43	OK	124.099	96.2966	151.901	OK
YBR037C	YBR037C	SCO1	II:310564-311452	19.2045	13.8067	24.6024	OK	28.7574	21.3789	36.136	OK	19.5863	14.1688	25.0038	OK	27.1754	20.159	34.1919	OK
YBR038W	YBR038W	CHS2	II:311897-314789	23.0938	17.8849	28.3026	OK	21.1026	16.322	25.8832	OK	34.9314	27.162	42.7009	OK	31.5674	24.5425	38.5923	OK
YBR039W	YBR039W	ATP3	II:315574-316510	76.9682	59.5412	94.3953	OK	137.639	106.961	168.316	OK	109.596	85.1962	133.997	OK	150.35	116.904	183.795	OK
YBR040W	YBR040W	FIG1	II:316967-317864	0.809229	0.0217305	1.59673	OK	0.50279	0	1.14508	OK	1.68788	0.540582	2.83517	OK	1.32785	0.323231	2.33247	OK
YBR041W	YBR041W	FAT1	II:318265-320275	62.9113	48.8836	76.9389	OK	60.4166	46.9528	73.8804	OK	62.9861	48.9515	77.0207	OK	54.9381	42.7041	67.1721	OK
YBR042C	YBR042C	CST26	II:320415-321609	36.871	28.0804	45.6616	OK	29.3007	22.2142	36.3872	OK	30.5004	23.1874	37.8134	OK	25.8748	19.5063	32.2433	OK
YBR043C	YBR043C	QDR3	II:321875-323945	47.4951	36.9325	58.0576	OK	76.3248	59.2669	93.3826	OK	51.2775	39.8598	62.6953	OK	106.939	82.5896	131.288	OK
YBR044C	YBR044C	TCM62	II:324340-326059	20.6819	15.7278	25.636	OK	23.4674	17.9495	28.9853	OK	18.4433	13.9541	22.9325	OK	22.7748	17.404	28.1457	OK
YBR045C	YBR045C	GIP1	II:328172-330092	5.05433	3.53786	6.5708	OK	4.04983	2.74399	5.35568	OK	5.42912	3.83873	7.01951	OK	4.2658	2.91881	5.61279	OK
YBR046C	YBR046C	ZTA1	II:330506-331511	29.4214	22.0895	36.7532	OK	119.361	92.7453	145.976	OK	60.9876	47.07	74.9052	OK	130.708	101.598	159.818	OK
YBR047W	YBR047W	FMP23	II:331832-332360	3.25455	1.00752	5.50158	OK	11.2948	6.90522	15.6844	OK	4.30591	1.76424	6.84757	OK	12.4525	7.79571	17.1094	OK
YBR048W	YBR048W	RPS11B	II:332830-333812	670.903	513.822	827.984	OK	285.318	221.768	348.867	OK	382.844	297.632	468.056	OK	207.787	161.119	254.455	OK
YBR049C	YBR049C	REB1	II:334385-336818	42.6411	33.0119	52.2702	OK	37.6313	29.2034	46.0591	OK	19.3049	14.8396	23.7701	OK	17.846	13.6992	21.9927	OK
YBR050C	YBR050C	REG2	II:337182-338338	0.511357	0	1.12893	OK	1.35554	0.399703	2.31138	OK	1.25818	0.350247	2.16612	OK	1.96692	0.838642	3.0952	OK
YBR051W	YBR051W	-	II:337182-338338	0.388182	0	1.64612	OK	0.158581	0	0.952567	OK	1.28027	0	3.37798	OK	0.962917	0	2.66593	OK
YBR052C	YBR052C	RFS1	II:338719-339352	53.056	39.7561	66.3559	OK	155.876	120.834	190.918	OK	76.1546	58.1624	94.1469	OK	131.686	102.042	161.33	OK
YBR053C	YBR053C	-	II:339674-340751	27.482	20.6266	34.3374	OK	88.1362	68.4773	107.795	OK	50.1198	38.5909	61.6486	OK	93.2764	72.5187	114.034	OK
YBR054W	YBR054W	YRO2	II:343100-344135	339.583	259.034	420.132	OK	346.957	265.308	428.606	OK	694.867	517.959	871.775	OK	456.49	346.075	566.905	OK
YBR055C	YBR055C	PRP6	II:344601-347301	50.4913	39.2403	61.7423	OK	29.6274	22.9954	36.2595	OK	36.7431	28.5696	44.9166	OK	25.8228	20.0238	31.6218	OK
YBR056C-B	YBR056C-B	-	II:351254-351455	3.1833	1.10839	5.2582	OK	3.22093	0	6.84918	OK	12.443	0	32.1362	OK	0	0	0	OK
YBR056W	YBR056W	-	II:347878-349384	38.699	29.8608	47.5372	OK	120.321	93.3069	147.336	OK	98.6632	76.695	120.631	OK	153.617	118.596	188.638	OK
YBR056W-A	YBR056W-A	-	II:351254-351455	15.9414	2.56049	29.3223	OK	37.2401	17.0518	57.4284	OK	37.1575	17.2088	57.1062	OK	96.3367	62.2111	130.462	OK
YBR057C	YBR057C	MUM2	II:352192-353293	24.574	18.3703	30.7777	OK	19.5573	14.4406	24.6741	OK	14.4914	10.4859	18.4968	OK	17.7782	13.0462	22.5102	OK
YBR058C	YBR058C	UBP14	II:353671-356017	42.3733	32.9156	51.8311	OK	38.9434	30.2748	47.612	OK	43.0289	33.4579	52.5999	OK	37.0792	28.8324	45.3261	OK
YBR058C-A	YBR058C-A	TSC3	II:356323-356566	141.944	101.563	182.325	OK	120.525	85.2371	155.813	OK	85.3893	58.6701	112.109	OK	115.633	82.2495	149.016	OK
YBR059C	YBR059C	AKL1	II:356860-360187	31.3321	24.2675	38.3968	OK	50.5721	39.1977	61.9465	OK	39.2877	30.5517	48.0237	OK	46.6012	36.1817	57.0208	OK
YBR060C	YBR060C	ORC2	II:360651-362514	16.0094	12.0665	19.9522	OK	8.70038	6.33024	11.0705	OK	11.0995	8.19986	13.9992	OK	6.55737	4.67673	8.438	OK
YBR061C	YBR061C	TRM7	II:364786-365719	10.956	7.61339	14.2986	OK	3.44108	1.82138	5.06079	OK	7.69795	5.07024	10.3257	OK	4.81148	2.88149	6.74147	OK
YBR062C	YBR062C	-	II:365975-366600	45.7141	33.5393	57.8889	OK	81.5994	61.9727	101.226	OK	89.9179	68.6137	111.222	OK	106.228	81.5728	130.882	OK
YBR063C	YBR063C	-	II:366969-368191	31.7343	24.1386	39.3299	OK	21.6985	16.2185	27.1786	OK	27.7772	20.9999	34.5545	OK	26.0132	19.6004	32.4259	OK
YBR064W	YBR064W	-	II:366969-368191	0.192318	0	1.08198	OK	0	0	0	OK	0.203696	0	1.08566	OK	1.50535	0	4.83642	OK
YBR065C	YBR065C	ECM2	II:368583-369678	39.4199	30.1271	48.7126	OK	33.5339	25.4802	41.5876	OK	35.5074	27.0153	43.9995	OK	38.0763	29.1019	47.0507	OK
YBR066C	YBR066C	NRG2	II:370036-370699	15.3162	10.4954	20.137	OK	25.2902	18.1319	32.4485	OK	18.2735	12.8501	23.697	OK	20.8167	14.7778	26.8557	OK
YBR067C	YBR067C	TIP1	II:372102-372735	33.7077	24.6274	42.788	OK	46.3138	34.5257	58.1018	OK	212.984	165.647	260.321	OK	161.863	125.452	198.273	OK
YBR068C	YBR068C	BAP2	II:373860-375690	261.238	196.965	325.511	OK	30.8761	23.828	37.9243	OK	331.756	248.212	415.299	OK	155.166	119.188	191.145	OK
YBR069C	YBR069C	TAT1	II:376573-378433	293.3	220.739	365.861	OK	53.1453	41.3119	64.9788	OK	213.806	162.64	264.971	OK	96.8109	75.0418	118.58	OK
YBR070C	YBR070C	ALG14	II:379220-379934	36.1359	26.5293	45.7424	OK	27.9384	20.3272	35.5496	OK	35.2869	26.1572	44.4166	OK	31.3792	23.0986	39.6598	OK
YBR071W	YBR071W	-	II:380410-381046	15.4361	10.4627	20.4094	OK	31.681	23.0016	40.3603	OK	26.901	19.3339	34.4681	OK	33.4374	24.4695	42.4054	OK
YBR072C-A	YBR072C-A	-	II:382859-383021	0	0	0	OK	0	0	0	OK	0	0	0	OK	0	0	0	OK
YBR072W	YBR072W	HSP26	II:382029-382674	24.308	17.3267	31.2893	OK	118.802	91.7517	145.852	OK	166.3	128.98	203.619	OK	213.192	165.813	260.571	OK
YBR073W	YBR073W	RDH54	II:383111-385988	78.9065	60.8862	96.9268	OK	73.6365	56.943	90.33	OK	72.7332	56.2401	89.2263	OK	71.3727	55.1932	87.5522	OK
YBR074W	YBR074W	-	II:386285-389216	136.962	103.958	169.967	OK	75.7202	58.4073	93.0331	OK	119.074	90.7995	147.348	OK	65.8117	50.985	80.6383	OK
YBR076C-A	YBR076C-A	-	II:391350-391617	10.9909	3.38498	18.5968	OK	7.94055	1.42341	14.4577	OK	12.249	4.49156	20.0064	OK	11.2059	3.79494	18.6169	OK
YBR076W	YBR076W	ECM8	II:390226-391291	0.624417	0	1.26483	OK	0.772887	0.0817758	1.464	OK	3.21775	1.77421	4.66128	OK	2.24924	1.06269	3.43578	OK
YBR077C	YBR077C	SLM4	II:391804-392293	36.6625	26.1628	47.1621	OK	51.4123	37.7167	65.1078	OK	42.5518	30.8398	54.2637	OK	55.8835	41.3127	70.4543	OK
YBR078W	YBR078W	ECM33	II:393122-394742	271.701	207.606	335.795	OK	239.648	182.769	296.526	OK	325.992	247.542	404.443	OK	215.19	165.017	265.364	OK
YBR079C	YBR079C	RPG1	II:395382-398277	131.414	99.652	163.176	OK	35.7569	27.8023	43.7116	OK	69.8999	54.0705	85.7292	OK	26.1377	20.2832	31.9923	OK
YBR080C	YBR080C	SEC18	II:398613-400890	38.419	29.8329	47.005	OK	63.9807	49.6835	78.2778	OK	35.5805	27.6248	43.5361	OK	40.1504	31.2129	49.0879	OK
YBR081C	YBR081C	SPT7	II:401252-405251	64.1868	49.1199	79.2538	OK	58.2713	44.878	71.6647	OK	46.8422	36.2422	57.4423	OK	47.0166	36.437	57.5962	OK
YBR082C	YBR082C	UBC4	II:406627-407169	70.9062	52.6016	89.2108	OK	83.8721	62.821	104.923	OK	100.43	76.0141	124.846	OK	90.6626	68.3265	112.999	OK
YBR083W	YBR083W	TEC1	II:409168-410629	4.79732	3.17367	6.42097	OK	3.17777	1.94734	4.4082	OK	6.94907	4.84439	9.05374	OK	4.00997	2.57881	5.44113	OK
YBR084C-A	YBR084C-A	RPL19A	II:414185-415261	659.481	505.484	813.479	OK	296.258	230.297	362.219	OK	419.015	324.955	513.074	OK	198.619	154.397	242.84	OK
YBR084W	YBR084W	MIS1	II:411053-413981	234.944	174.457	295.431	OK	43.4608	33.7895	53.132	OK	105.17	80.4222	129.919	OK	38.5511	29.9733	47.1288	OK
YBR085C-A	YBR085C-A	-	II:418906-419164	78.4614	53.649	103.274	OK	282.132	213.367	350.896	OK	279.441	211.576	347.306	OK	594.979	460.917	729.04	OK
YBR085W	YBR085W	AAC3	II:415982-416906	7.71438	5.06531	10.3635	OK	3.96557	2.21351	5.71763	OK	6.5659	4.16505	8.96675	OK	1.28112	0.311858	2.25039	OK
YBR086C	YBR086C	IST2	II:420200-423041	106.473	81.0144	131.932	OK	71.7471	55.3995	88.0946	OK	78.0772	60.1669	95.9875	OK	51.863	40.2112	63.5149	OK
YBR087W	YBR087W	RFC5	II:423764-424829	43.3113	33.1216	53.5011	OK	33.1575	25.1403	41.1748	OK	33.5439	25.4193	41.6685	OK	30.6859	23.1949	38.1768	OK
YBR088C	YBR088C	POL30	II:424989-425782	50.0672	37.8994	62.235	OK	52.7005	40.049	65.352	OK	32.6984	24.2551	41.1417	OK	31.0602	22.9283	39.1921	OK
YBR089C-A	YBR089C-A	NHP6B	II:426189-427058	134.158	96.2232	172.092	OK	222.397	160.978	283.816	OK	108.619	74.7848	142.453	OK	132.225	92.4945	171.955	OK
YBR089W	YBR089W	-	II:424989-425782	0.669235	0	2.38081	OK	0.425161	0	1.85452	OK	0.607315	0	1.97415	OK	1.2725	0	3.25764	OK
YBR090C	YBR090C	-	II:426189-427058	20.4575	7.62519	33.2899	OK	40.5476	16.5074	64.5878	OK	20.3081	5.97864	34.6375	OK	24.4541	8.15873	40.7495	OK
YBR091C	YBR091C	TIM12	II:427154-427484	10.5799	4.58716	16.5726	OK	7.23297	2.37087	12.0951	OK	11.4456	5.23903	17.6521	OK	3.66875	0.107765	7.22974	OK
YBR092C	YBR092C	PHO3	II:427697-429101	176.534	136.23	216.838	OK	20.5958	15.4969	25.6947	OK	244.644	186.967	302.32	OK	46.6575	36.1072	57.2079	OK
YBR093C	YBR093C	PHO5	II:429547-430951	30.8716	23.6511	38.0922	OK	21.5763	16.2732	26.8794	OK	22.2461	16.8056	27.6866	OK	16.2187	12.0407	20.3967	OK
YBR094W	YBR094W	PBY1	II:432035-434297	29.9894	23.2394	36.7393	OK	20.3979	15.6831	25.1127	OK	28.5361	22.098	34.9742	OK	24.1168	18.5944	29.6391	OK
YBR095C	YBR095C	RXT2	II:434405-435698	26.7901	20.3242	33.256	OK	23.5091	17.7254	29.2928	OK	18.4279	13.7124	23.1434	OK	22.9858	17.3139	28.6577	OK
YBR096W	YBR096W	-	II:436020-436713	54.9154	41.2683	68.5625	OK	65.8013	50.1637	81.4388	OK	58.3633	44.326	72.4005	OK	67.4613	51.486	83.4366	OK
YBR097W	YBR097W	VPS15	II:436950-441315	32.0133	24.8403	39.1862	OK	32.2643	25.0433	39.4853	OK	26.3261	20.4677	32.1846	OK	27.8874	21.6834	34.0914	OK
YBR098W	YBR098W	MMS4	II:441514-443590	9.26268	6.70856	11.8168	OK	9.104	6.67101	11.537	OK	8.05356	5.80324	10.3039	OK	8.07882	5.87666	10.281	OK
YBR099C	YBR099C	-	II:441514-443590	8.20492	0.000555896	16.4093	OK	2.32102	0	7.41724	OK	5.91673	0.0781527	11.7553	OK	1.65058	0	4.65156	OK
YBR101C	YBR101C	FES1	II:443820-444693	97.2959	75.428	119.164	OK	107.424	83.4418	131.405	OK	92.2512	71.5316	112.971	OK	88.7372	68.6632	108.811	OK
YBR102C	YBR102C	EXO84	II:445061-447323	16.4735	12.476	20.471	OK	15.8156	12.023	19.6081	OK	14.3042	10.852	17.7564	OK	15.1537	11.5169	18.7906	OK
YBR103C-A	YBR103C-A	-	II:449319-449463	0	0	0	OK	0	0	0	OK	0	0	0	OK	6.70579	2.56289	10.8487	OK
YBR103W	YBR103W	SIF2	II:447708-449316	33.8415	26.0963	41.5867	OK	43.7859	33.9297	53.642	OK	29.1012	22.3615	35.8409	OK	38.1988	29.5297	46.8678	OK
YBR104W	YBR104W	YMC2	II:449666-450656	30.2882	22.7579	37.8185	OK	38.4054	29.1718	47.6389	OK	26.9332	20.1089	33.7576	OK	41.9008	31.9946	51.8071	OK
YBR105C	YBR105C	VID24	II:450880-451969	19.5806	14.4306	24.7307	OK	12.953	9.26266	16.6434	OK	22.1162	16.4458	27.7867	OK	14.9964	10.8131	19.1796	OK
YBR106W	YBR106W	PHO88	II:452657-453224	612.358	466.225	758.49	OK	472.024	364.256	579.792	OK	701.924	536.797	867.05	OK	454.601	351.857	557.345	OK
YBR107C	YBR107C	IML3	II:453792-454530	18.3185	13.01	23.627	OK	18.8589	13.4014	24.3164	OK	19.4251	13.8426	25.0077	OK	18.0286	12.7576	23.2997	OK
YBR108W	YBR108W	AIM3	II:454821-457665	10.4904	7.89184	13.0891	OK	15.8754	12.1681	19.5826	OK	12.3049	9.3592	15.2506	OK	14.5335	11.1295	17.9375	OK
YBR109C	YBR109C	CMD1	II:457918-458362	19.9202	12.9641	26.8763	OK	32.3368	22.681	41.9925	OK	36.1361	25.7781	46.4941	OK	44.1815	31.6937	56.6692	OK
YBR109W-A	YBR109W-A	-	II:458607-458832	21.8611	8.46396	35.2582	OK	22.0494	8.87983	35.219	OK	9.02787	4.09635	13.9594	OK	9.94084	1.23976	18.6419	OK
YBR110W	YBR110W	ALG1	II:458871-460221	74.4205	57.7467	91.0944	OK	87.7747	68.1907	107.359	OK	69.4764	53.9188	85.034	OK	82.8398	64.3792	101.3	OK
YBR111C	YBR111C	YSA1	II:461177-461873	35.0269	25.8771	44.1768	OK	59.3775	45.1371	73.6179	OK	58.8223	44.7204	72.9243	OK	69.0249	52.8361	85.2137	OK
YBR111W-A	YBR111W-A	SUS1	II:462138-462579	43.2757	28.1725	58.379	OK	51.0183	34.2981	67.7386	OK	39.2381	25.3002	53.1761	OK	81.8852	58.2715	105.499	OK
YBR112C	YBR112C	CYC8	II:462869-466048	20.2395	15.4901	24.9889	OK	14.9518	11.4376	18.4661	OK	14.9359	11.4188	18.453	OK	9.64109	7.23399	12.0482	OK
YBR113W	YBR113W	-	II:462869-466048	0.840379	0	3.70787	OK	0.543893	0	2.49768	OK	0.5946	0	2.64017	OK	2.19991	0	5.57985	OK
YBR114W	YBR114W	RAD16	II:467247-469620	29.2652	22.6731	35.8573	OK	25.6968	19.8678	31.5258	OK	33.495	25.9953	40.9947	OK	30.5248	23.6668	37.3827	OK
YBR115C	YBR115C	LYS2	II:469747-473926	61.2911	47.1151	75.4671	OK	97.3554	73.7851	120.926	OK	54.7434	42.2252	67.2616	OK	71.3134	54.5563	88.0704	OK
YBR116C	YBR116C	-	II:474198-476437	1.06047	0	3.21184	OK	2.37738	0	5.41904	OK	5.45232	0.870395	10.0342	OK	10.0575	3.21285	16.9022	OK
YBR117C	YBR117C	TKL2	II:474198-476437	1.71364	0.899337	2.52794	OK	2.12329	1.17656	3.07001	OK	8.12842	5.82707	10.4298	OK	12.893	9.516	16.27	OK
YBR118W	YBR118W	TEF2	II:477670-479047	1091.57	778.744	1404.4	OK	963.023	692.422	1233.62	OK	806.428	586.659	1026.2	OK	638.634	469.984	807.284	OK
YBR119W	YBR119W	MUD1	II:479337-480323	11.5868	8.06502	15.1086	OK	10.8969	7.52871	14.2651	OK	14.8461	10.5548	19.1375	OK	12.0887	8.48045	15.6969	OK
YBR120C	YBR120C	CBP6	II:480434-480923	5.20952	2.20952	8.20952	OK	7.00004	3.44903	10.551	OK	3.42058	0.960574	5.88058	OK	4.49997	1.75937	7.24057	OK
YBR121C	YBR121C	GRS1	II:481363-483367	273.303	205.691	340.915	OK	164.951	126.134	203.769	OK	187.275	142.64	231.91	OK	132.883	102.207	163.559	OK
YBR121C-A	YBR121C-A	-	II:481363-483367	0	0	0	OK	0	0	0	OK	0	0	0	OK	0	0	0	OK
YBR122C	YBR122C	MRPL36	II:483969-484503	46.4805	33.9924	58.9687	OK	62.25	46.4344	78.0656	OK	41.8452	30.5726	53.1177	OK	61.2981	45.8403	76.7559	OK
YBR123C	YBR123C	TFC1	II:484741-486866	25.2152	19.3562	31.0742	OK	25.9515	19.9815	31.9214	OK	23.2465	17.8597	28.6332	OK	21.3107	16.3118	26.3095	OK
YBR124W	YBR124W	-	II:484741-486866	0.627367	0	2.9274	OK	0.269194	0	1.88678	OK	0	0	0	OK	0	0	0	OK
YBR125C	YBR125C	PTC4	II:487198-488380	23.6855	17.7645	29.6066	OK	18.9924	14.0722	23.9126	OK	26.3069	19.8278	32.7859	OK	24.1345	18.1268	30.1423	OK
YBR126C	YBR126C	TPS1	II:488904-490392	184.035	141.506	226.563	OK	588.471	433.084	743.859	OK	430	321.522	538.478	OK	758.008	549.606	966.409	OK
YBR126W-A	YBR126W-A	-	II:490849-491070	99.0524	62.9933	135.112	OK	187.093	126.735	247.451	OK	107.43	67.2205	147.64	OK	202.022	139.324	264.72	OK
YBR126W-B	YBR126W-B	-	II:490849-491070	68.668	4.27994	133.056	OK	123.238	6.69832	239.779	OK	100.127	9.91245	190.342	OK	176.047	54.9701	297.123	OK
YBR127C	YBR127C	VMA2	II:491268-492822	243.788	185.789	301.786	OK	370.594	278.29	462.897	OK	243.114	185.279	300.95	OK	295.241	223.577	366.906	OK
YBR128C	YBR128C	ATG14	II:493080-494115	5.62108	3.545	7.69716	OK	11.6247	8.27489	14.9746	OK	8.10834	5.50868	10.708	OK	9.41048	6.52651	12.2944	OK
YBR129C	YBR129C	OPY1	II:494352-495339	26.9573	20.1106	33.8039	OK	27.5268	20.58	34.4736	OK	25.96	19.3319	32.5882	OK	26.49	19.7215	33.2584	OK
YBR130C	YBR130C	SHE3	II:495591-496869	15.3844	11.2799	19.4888	OK	11.5637	8.2914	14.8361	OK	11.3294	8.10329	14.5556	OK	7.60871	5.27317	9.94426	OK
YBR131C-A	YBR131C-A	-	II:497162-499277	0	0	0	OK	0	0	0	OK	0	0	0	OK	0	0	0	OK
YBR131W	YBR131W	CCZ1	II:497162-499277	13.7327	10.3571	17.1082	OK	10.1092	7.48951	12.7289	OK	11.5253	8.60648	14.444	OK	11.7763	8.7914	14.7612	OK
YBR132C	YBR132C	AGP2	II:499651-501442	13.5619	10.123	17.0008	OK	47.4415	36.8646	58.0184	OK	23.5461	18.0437	29.0485	OK	45.138	35.0455	55.2305	OK
YBR133C	YBR133C	HSL7	II:501803-504644	53.6178	41.6773	65.5584	OK	36.7218	28.5444	44.8992	OK	48.6116	37.7899	59.4332	OK	38.4649	29.9054	47.0243	OK
YBR134W	YBR134W	-	II:501803-504644	0.406642	0	3.69614	OK	0.776313	0	4.60332	OK	0.323749	0	2.23111	OK	0.452295	0	2.74964	OK
YBR135W	YBR135W	CKS1	II:504853-505306	10.0321	5.52959	14.5346	OK	7.26669	3.44441	11.089	OK	12.363	7.31441	17.4115	OK	5.88206	2.51616	9.24795	OK
YBR136W	YBR136W	MEC1	II:505667-512774	28.8916	22.2161	35.5671	OK	20.9513	16.23	25.6727	OK	28.3026	21.8761	34.7291	OK	26.5336	20.5467	32.5204	OK
YBR137W	YBR137W	-	II:513043-513583	19.0353	12.8512	25.2195	OK	53.9826	39.9726	67.9926	OK	32.7138	23.5021	41.9254	OK	65.4018	49.1567	81.647	OK
YBR138C	YBR138C	-	II:513761-515336	5.94752	4.08211	7.81293	OK	12.3846	9.11694	15.6523	OK	11.5594	8.45905	14.6597	OK	20.1512	15.2491	25.0532	OK
YBR139W	YBR139W	-	II:515663-517190	56.2638	43.67	68.8577	OK	359.521	270.84	448.201	OK	148.171	114.543	181.8	OK	305.417	231.022	379.813	OK
YBR140C	YBR140C	IRA1	II:517349-526628	61.3616	45.3787	77.3444	OK	58.231	43.5092	72.9528	OK	75.0874	55.63	94.5448	OK	73.1872	54.3192	92.0552	OK
YBR141C	YBR141C	-	II:527024-528038	31.4619	23.6914	39.2324	OK	3.25705	1.76589	4.74821	OK	17.8395	12.9949	22.6841	OK	7.15783	4.73114	9.58451	OK
YBR141W-A	YBR141W-A	-	II:527024-528038	0	0	0	OK	0	0	0	OK	0	0	0	OK	0	0	0	OK
YBR142W	YBR142W	MAK5	II:528316-530638	65.1051	50.4577	79.7526	OK	4.1322	2.89888	5.36552	OK	36.1684	28.1077	44.229	OK	9.77732	7.28165	12.273	OK
YBR143C	YBR143C	SUP45	II:530868-532182	254.832	195.074	314.589	OK	101.227	78.7084	123.746	OK	172.203	133.003	211.403	OK	95.2945	74.0998	116.489	OK
YBR144C	YBR144C	-	II:533234-533549	0.950732	0	3.13711	OK	0.734929	0	2.33568	OK	2.08766	0	5.04439	OK	1.6542	0	4.19768	OK
YBR145W	YBR145W	ADH5	II:533761-534817	12.265	8.69244	15.8375	OK	39.2526	29.8979	48.6073	OK	47.5284	36.5176	58.5391	OK	64.903	50.211	79.5951	OK
YBR146W	YBR146W	MRPS9	II:535259-536096	22.8432	16.6693	29.0172	OK	27.0337	19.9593	34.108	OK	18.5018	13.2479	23.7557	OK	20.517	14.8569	26.1772	OK
YBR147W	YBR147W	RTC2	II:536574-537465	3.23643	1.61566	4.8572	OK	21.8417	15.9596	27.7237	OK	25.0526	18.5094	31.5958	OK	37.2981	28.1209	46.4752	OK
YBR148W	YBR148W	YSW1	II:537875-539705	3.76636	2.50266	5.03006	OK	3.87846	2.5919	5.16501	OK	5.45288	3.83087	7.07489	OK	6.22559	4.39646	8.05473	OK
YBR149W	YBR149W	ARA1	II:539986-541021	38.0598	28.9719	47.1477	OK	149.225	115.974	182.476	OK	89.535	69.5612	109.509	OK	150.64	117.079	184.201	OK
YBR150C	YBR150C	TBS1	II:541208-544493	33.0974	25.6988	40.4961	OK	50.1167	38.8645	61.369	OK	34.6304	26.9286	42.3321	OK	45.8607	35.6219	56.0995	OK
YBR151W	YBR151W	APD1	II:545027-545978	80.8274	62.4982	99.1565	OK	126.614	98.3729	154.855	OK	106.388	82.6094	130.166	OK	131.936	102.475	161.396	OK
YBR152W	YBR152W	SPP381	II:546375-547251	37.2084	28.0415	46.3753	OK	25.165	18.5526	31.7775	OK	28.3164	21.0445	35.5883	OK	25.3114	18.6908	31.9319	OK
YBR153W	YBR153W	RIB7	II:547459-548194	31.3811	23.1015	39.6608	OK	25.4478	18.4984	32.3972	OK	23.0334	16.6285	29.4383	OK	26.5148	19.3233	33.7062	OK
YBR154C	YBR154C	RPB5	II:548361-549009	102.842	79.199	126.485	OK	29.8573	21.6491	38.0655	OK	59.2332	44.8368	73.6297	OK	29.1068	21.1393	37.0742	OK
YBR155W	YBR155W	CNS1	II:549770-550928	15.3868	11.2222	19.5515	OK	3.20598	1.8053	4.60666	OK	10.426	7.38436	13.4675	OK	5.1215	3.28363	6.95937	OK
YBR156C	YBR156C	SLI15	II:551103-553200	8.37775	6.11297	10.6425	OK	6.90391	4.9873	8.82051	OK	6.18546	4.42795	7.94297	OK	6.25845	4.47682	8.04008	OK
YBR157C	YBR157C	ICS2	II:553542-554310	14.0423	9.78424	18.3003	OK	57.6521	44.0142	71.29	OK	7.27269	4.49772	10.0477	OK	14.9888	10.5345	19.4432	OK
YBR158W	YBR158W	AMN1	II:556548-558198	238.319	181.204	295.435	OK	166.264	127.871	204.657	OK	107.892	83.6684	132.116	OK	134.697	104.114	165.279	OK
YBR159W	YBR159W	IFA38	II:558684-559728	213.504	164.477	262.53	OK	221.202	170.922	271.482	OK	194.016	150.211	237.822	OK	188.434	145.768	231.1	OK
YBR160W	YBR160W	CDC28	II:560077-560974	40.8583	30.9283	50.7882	OK	33.6004	25.2014	41.9994	OK	42.2913	32.1237	52.4588	OK	41.8876	31.8214	51.9539	OK
YBR161W	YBR161W	CSH1	II:561633-562764	26.0777	19.5966	32.5588	OK	20.307	15.0533	25.5607	OK	33.4998	25.4733	41.5264	OK	30.5018	23.1248	37.8789	OK
YBR162C	YBR162C	TOS1	II:563202-564570	132.41	102.498	162.323	OK	103.003	80.0085	125.998	OK	119.334	92.6243	146.043	OK	86.0481	66.7584	105.338	OK
YBR162W-A	YBR162W-A	YSY6	II:565230-565428	260.695	187.015	334.374	OK	251.183	180.185	322.18	OK	180.442	126.919	233.965	OK	201.176	142.429	259.923	OK
YBR163W	YBR163W	EXO5	II:565722-567480	26.1974	20.1212	32.2736	OK	24.5717	18.8381	30.3053	OK	23.5617	18.0349	29.0884	OK	25.788	19.7773	31.7987	OK
YBR164C	YBR164C	ARL1	II:567874-568426	76.7248	58.1504	95.2993	OK	79.1321	60.0476	98.2165	OK	67.7186	51.0523	84.3849	OK	66.0989	49.7945	82.4033	OK
YBR165W	YBR165W	UBS1	II:568851-569685	14.0291	9.88833	18.17	OK	15.3392	10.8257	19.8526	OK	12.7048	8.84692	16.5627	OK	14.2733	10.1064	18.4402	OK
YBR166C	YBR166C	TYR1	II:569841-571200	38.1499	29.3555	46.9443	OK	36.224	27.8419	44.606	OK	37.6026	28.954	46.2511	OK	39.0511	30.0851	48.017	OK
YBR167C	YBR167C	POP7	II:571467-571890	14.2792	8.47235	20.086	OK	14.0848	8.30023	19.8695	OK	13.3105	7.83581	18.7852	OK	12.1844	6.96485	17.4039	OK
YBR168W	YBR168W	PEX32	II:572370-573612	23.3933	17.5845	29.202	OK	24.7723	18.6834	30.8612	OK	23.8261	17.9288	29.7233	OK	24.6049	18.5336	30.6762	OK
YBR169C	YBR169C	SSE2	II:573914-575996	47.7321	37.1188	58.3455	OK	196.673	149.284	244.062	OK	132.173	101.597	162.748	OK	204.677	155.181	254.173	OK
YBR170C	YBR170C	NPL4	II:576343-578086	24.1575	18.4847	29.8303	OK	33.5796	25.9281	41.2312	OK	36.8885	28.5377	45.2393	OK	41.5669	32.2222	50.9117	OK
YBR171W	YBR171W	SEC66	II:578363-578984	62.9689	47.6703	78.2674	OK	46.0732	34.2753	57.871	OK	59.1367	44.6471	73.6263	OK	39.3964	29.102	49.6908	OK
YBR172C	YBR172C	SMY2	II:579149-581372	101.141	77.8166	124.465	OK	26.649	20.5978	32.7002	OK	55.9724	43.5027	68.4421	OK	25.9316	20.0341	31.8291	OK
YBR173C	YBR173C	UMP1	II:581725-582172	13.0504	7.67906	18.4217	OK	16.7842	10.5304	23.0379	OK	37.768	26.7705	48.7655	OK	31.4273	22.0896	40.765	OK
YBR174C	YBR174C	-	II:582337-583355	0.477071	0	2.66345	OK	0.212262	0	1.11541	OK	0.870924	0	3.10613	OK	0	0	0	OK
YBR175W	YBR175W	SWD3	II:582337-583355	28.8497	21.4573	36.242	OK	19.4437	14.1235	24.7638	OK	27.4122	20.4124	34.4119	OK	20.3179	14.878	25.7578	OK
YBR176W	YBR176W	ECM31	II:583719-584658	17.5309	12.6663	22.3955	OK	11.6522	8.17424	15.1302	OK	18.9672	13.7755	24.1589	OK	16.7498	12.073	21.4265	OK
YBR177C	YBR177C	EHT1	II:584806-586445	30.4868	23.3044	37.6692	OK	74.8599	58.1944	91.5253	OK	27.1733	20.6542	33.6925	OK	39.0536	30.0866	48.0205	OK
YBR178W	YBR178W	-	II:584806-586445	0.110935	0	0.845381	OK	0.776392	0	4.93896	OK	0.6173	0	2.56455	OK	0.351219	0	1.93424	OK
YBR179C	YBR179C	FZO1	II:586546-589114	25.8274	19.9217	31.733	OK	27.842	21.5832	34.1007	OK	22.7709	17.5974	27.9444	OK	25.4358	19.7056	31.166	OK
YBR180W	YBR180W	DTR1	II:589740-591459	0.732675	0.208275	1.25707	OK	0.394279	0.0236634	0.764894	OK	0.444792	0.0462177	0.843367	OK	0.601697	0.125674	1.07772	OK
YBR181C	YBR181C	RPS6B	II:591711-592774	1019.96	753.507	1286.41	OK	409.44	314.984	503.896	OK	580.2	441.719	718.682	OK	287.983	223.334	352.631	OK
YBR182C	YBR182C	SMP1	II:593505-594864	7.76843	5.44532	10.0915	OK	9.28901	6.61866	11.9594	OK	9.49997	6.76919	12.2307	OK	14.1822	10.4247	17.9397	OK
YBR182C-A	YBR182C-A	-	II:595360-595555	4.17427	0	11.3512	OK	0.474018	0	2.07853	OK	0	0	0	OK	3.65514	0	10.1171	OK
YBR183W	YBR183W	YPC1	II:596114-597065	21.5909	15.8242	27.3576	OK	36.6724	27.7497	45.595	OK	31.3486	23.548	39.1492	OK	40.8305	31.0059	50.6551	OK
YBR184W	YBR184W	-	II:597362-598934	5.47652	3.7632	7.18984	OK	5.36818	3.67223	7.06414	OK	2.67235	1.59455	3.75015	OK	3.24884	2.03494	4.46274	OK
YBR185C	YBR185C	MBA1	II:599122-599959	6.57012	4.08232	9.05791	OK	6.62567	4.10771	9.14362	OK	7.79482	5.00374	10.5859	OK	7.24894	4.58927	9.90861	OK
YBR186W	YBR186W	PCH2	II:600552-602360	2.22412	1.29594	3.1523	OK	4.75818	3.24465	6.27172	OK	7.08489	5.02082	9.14896	OK	8.75172	6.31521	11.1882	OK
YBR187W	YBR187W	GDT1	II:602633-603476	134.32	103.362	165.278	OK	75.2717	57.9223	92.6211	OK	85.1576	65.8145	104.501	OK	61.7135	47.4148	76.0123	OK
YBR188C	YBR188C	NTC20	II:603684-604107	9.1733	4.61433	13.7323	OK	10.985	5.98037	15.9895	OK	8.61202	4.27092	12.9531	OK	8.78559	4.45089	13.1203	OK
YBR189W	YBR189W	RPS9B	II:604507-605508	958.051	720.07	1196.03	OK	292.581	226.823	358.339	OK	461.824	357.064	566.584	OK	169.385	131.483	207.287	OK
YBR190W	YBR190W	-	II:605965-607140	1.13885	0	13.5462	OK	0.72177	0	6.57672	OK	0.862266	0	6.84714	OK	1.9033	0	10.095	OK
YBR191W	YBR191W	RPL21A	II:605965-607140	1191.77	894.286	1489.25	OK	432.323	335.427	529.22	OK	664.473	512.919	816.026	OK	321.097	249.229	392.966	OK
YBR191W-A	YBR191W-A	-	II:607148-607223	0	0	0	OK	0	0	0	OK	0	0	0	OK	0	0	0	OK
YBR192W	YBR192W	RIM2	II:607651-608785	31.9158	24.218	39.6137	OK	19.1349	14.145	24.1249	OK	23.3415	17.4545	29.2284	OK	13.7393	9.92677	17.5518	OK
YBR193C	YBR193C	MED8	II:609081-609753	11.6956	7.70139	15.6898	OK	11.426	7.49235	15.3596	OK	10.7713	6.99882	14.5438	OK	9.98444	6.3767	13.5922	OK
YBR194W	YBR194W	AIM4	II:610037-610409	10.2856	4.97026	15.601	OK	10.5369	5.12624	15.9477	OK	5.14546	1.51514	8.77579	OK	8.38929	3.64308	13.1355	OK
YBR195C	YBR195C	MSI1	II:610613-611882	18.851	14.024	23.6779	OK	12.9072	9.36758	16.4468	OK	10.484	7.48064	13.4874	OK	8.97453	6.32526	11.6238	OK
YBR196C	YBR196C	PGI1	II:612235-613900	932.444	664.471	1200.42	OK	895.663	639.527	1151.8	OK	758.514	546.61	970.418	OK	592.225	432.505	751.945	OK
YBR196C-A	YBR196C-A	-	II:614023-614173	11.4662	0	30.9643	OK	1.88592	0	4.11139	OK	0	0	0	OK	0	0	0	OK
YBR196C-B	YBR196C-B	-	II:614525-614630	0	0	0	OK	0	0	0	OK	58.8796	55.536	62.2231	OK	0	0	0	OK
YBR197C	YBR197C	-	II:615202-615856	31.8372	23.232	40.4424	OK	12.4317	8.21409	16.6492	OK	21.2176	15.032	27.4033	OK	13.0986	8.73826	17.4588	OK
YBR198C	YBR198C	TAF5	II:616126-618523	73.9008	57.2184	90.5832	OK	50.4922	39.2505	61.7339	OK	50.7722	39.4782	62.0662	OK	41.6147	32.365	50.8643	OK
YBR199W	YBR199W	KTR4	II:618908-620303	137.662	106.64	168.683	OK	175.721	135.657	215.784	OK	162.949	125.921	199.977	OK	152.87	118.307	187.434	OK
YBR200W	YBR200W	BEM1	II:620871-622527	26.711	20.4832	32.9388	OK	32.5075	25.0607	39.9543	OK	29.068	22.3617	35.7743	OK	30.7324	23.6756	37.7893	OK
YBR200W-A	YBR200W-A	-	II:622982-623147	0.91172	0	2.89556	OK	0	0	0	OK	0	0	0	OK	0	0	0	OK
YBR201C-A	YBR201C-A	-	II:624492-624696	1.78859	0	4.05718	OK	0.966473	0	3.21045	OK	2.81261	0.677833	4.9474	OK	9.61258	0	19.4242	OK
YBR201W	YBR201W	DER1	II:623575-624211	24.5733	17.4835	31.6631	OK	21.8422	15.572	28.1124	OK	25.2074	17.9979	32.4169	OK	23.3269	16.66	29.9939	OK
YBR202W	YBR202W	MCM7	II:625771-628309	43.4971	33.815	53.1793	OK	37.5883	29.2283	45.9483	OK	39.0165	30.3433	47.6897	OK	32.8827	25.5293	40.236	OK
YBR203W	YBR203W	COS111	II:629167-631942	7.66993	5.68728	9.65258	OK	16.722	12.8638	20.5803	OK	18.4218	14.1832	22.6605	OK	28.7649	22.3424	35.1874	OK
YBR204C	YBR204C	LDH1	II:632253-633381	20.4347	15.1603	25.7092	OK	45.4058	34.9109	55.9006	OK	33.096	25.1438	41.0482	OK	50.3553	38.8064	61.9041	OK
YBR205W	YBR205W	KTR3	II:633621-634924	102.408	78.4353	126.38	OK	73.7565	56.6023	90.9108	OK	93.4825	71.5995	115.366	OK	70.9172	54.4007	87.4337	OK
YBR206W	YBR206W	-	II:633621-634924	62.5684	11.884	113.253	OK	39.6582	4.23265	75.0838	OK	57.6908	14.294	101.088	OK	41.5663	9.31435	73.8183	OK
YBR207W	YBR207W	FTH1	II:635145-636543	78.0881	60.5805	95.5957	OK	79.2032	61.5456	96.8608	OK	66.528	51.7164	81.3397	OK	73.4716	57.1284	89.8147	OK
YBR208C	YBR208C	DUR1,2	II:636702-642210	67.6146	51.2669	83.9624	OK	1367.24	854.132	1880.36	OK	48.0972	36.9476	59.2468	OK	1014.67	652.327	1377.01	OK
YBR209W	YBR209W	-	II:642582-642900	0.903921	0	2.16516	OK	0.590644	0	1.71624	OK	0	0	0	OK	0	0	0	OK
YBR210W	YBR210W	ERV15	II:645549-645978	37.4948	26.4972	48.4924	OK	38.0082	26.9893	49.0271	OK	43.7935	31.2665	56.3204	OK	55.7301	40.6102	70.85	OK
YBR211C	YBR211C	AME1	II:646157-647132	23.7413	17.5854	29.8973	OK	22.9226	16.9464	28.8988	OK	25.4167	18.8913	31.9422	OK	34.4607	26.0421	42.8793	OK
YBR212W	YBR212W	NGR1	II:647885-649904	7.98704	5.78212	10.192	OK	11.3287	8.42553	14.2318	OK	17.301	13.1387	21.4633	OK	18.98	14.4726	23.4874	OK
YBR213W	YBR213W	MET8	II:650367-651192	6.47626	3.98009	8.97242	OK	3.02989	1.39775	4.66203	OK	5.27677	3.09482	7.45872	OK	3.10799	1.49021	4.72577	OK
YBR214W	YBR214W	SDS24	II:651414-652998	7.49828	5.33666	9.65989	OK	17.9628	13.4768	22.4488	OK	22.2177	16.8563	27.5792	OK	25.2969	19.2744	31.3195	OK
YBR215W	YBR215W	HPC2	II:653355-655317	14.1333	10.513	17.7536	OK	12.7606	9.5095	16.0117	OK	14.0448	10.5244	17.5652	OK	14.2103	10.6659	17.7547	OK
YBR216C	YBR216C	YBP1	II:655575-657600	35.3004	27.3681	43.2328	OK	35.6164	27.6002	43.6325	OK	31.5928	24.4354	38.7502	OK	35.5645	27.479	43.65	OK
YBR217W	YBR217W	ATG12	II:657831-658392	21.2317	14.7455	27.7179	OK	23.2141	16.3452	30.083	OK	21.4235	14.9173	27.9297	OK	24.2919	17.2317	31.3522	OK
YBR218C	YBR218C	PYC2	II:658706-662249	208.063	153.932	262.193	OK	203.711	150.858	256.564	OK	188.701	140.352	237.051	OK	164.236	122.909	205.564	OK
YBR219C	YBR219C	-	II:662498-664677	0	0	0	OK	0	0	0	OK	0	0	0	OK	0	0	0	OK
YBR220C	YBR220C	-	II:662498-664677	60.9685	47.4069	74.5301	OK	39.3303	30.4433	48.2173	OK	49.1269	38.1179	60.136	OK	30.8891	23.8063	37.9718	OK
YBR221C	YBR221C	PDB1	II:665152-666253	95.7133	74.4091	117.017	OK	139.086	107.92	170.252	OK	98.3772	76.5023	120.252	OK	111.398	86.6167	136.179	OK
YBR221W-A	YBR221W-A	-	II:666537-666642	0	0	0	OK	0	0	0	OK	0	0	0	OK	0	0	0	OK
YBR222C	YBR222C	PCS60	II:666719-668351	33.2538	25.6387	40.8688	OK	59.4022	46.176	72.6285	OK	32.8935	25.3394	40.4476	OK	52.7313	40.9825	64.4801	OK
YBR223C	YBR223C	TDP1	II:668662-673565	7.20981	3.66136	10.7583	OK	9.81865	5.19852	14.4388	OK	6.35962	3.20849	9.51075	OK	9.79983	5.19104	14.4086	OK
YBR223W-A	YBR223W-A	-	II:668662-673565	0	0	0	OK	0	0	0	OK	0	0	0	OK	0	0	0	OK
YBR224W	YBR224W	-	II:668662-673565	2.56083	0	7.95021	OK	2.40237	0	6.99071	OK	3.39374	0	7.94338	OK	3.13974	0	8.25169	OK
YBR225W	YBR225W	-	II:668662-673565	13.2551	9.66216	16.8481	OK	17.6199	12.9791	22.2607	OK	11.4582	8.26488	14.6516	OK	16.5	12.118	20.8819	OK
YBR226C	YBR226C	-	II:668662-673565	0.493025	0	2.83448	OK	0.413266	0	2.32016	OK	0.217965	0	1.14405	OK	0.302074	0	1.71473	OK
YBR227C	YBR227C	MCX1	II:673571-675134	15.9533	11.8797	20.0269	OK	18.1549	13.6546	22.6552	OK	16.905	12.6708	21.1392	OK	18.9977	14.3242	23.6712	OK
YBR228W	YBR228W	SLX1	II:675312-676227	12.9036	9.07758	16.7296	OK	14.9288	10.6286	19.2291	OK	11.6271	8.04568	15.2085	OK	14.9585	10.6412	19.2759	OK
YBR229C	YBR229C	ROT2	II:676356-679221	106.922	81.8403	132.004	OK	148.594	112.51	184.679	OK	139.821	106.1	173.541	OK	142.462	108.045	176.88	OK
YBR230C	YBR230C	OM14	II:679548-680050	13.4716	7.70882	19.2344	OK	42.3824	30.024	54.7407	OK	36.0677	24.8699	47.2655	OK	49.0127	35.0307	62.9947	OK
YBR230W-A	YBR230W-A	-	II:680361-680562	11.891	0.57299	23.209	OK	37.1938	17.0055	57.3821	OK	11.5498	0.337444	22.7621	OK	23.5335	7.89574	39.1712	OK
YBR231C	YBR231C	SWC5	II:682178-683090	25.9896	19.2402	32.739	OK	22.6542	16.6255	28.6829	OK	22.9912	16.9116	29.0707	OK	20.8904	15.277	26.5039	OK
YBR232C	YBR232C	-	II:683372-684669	0.977429	0	3.38022	OK	0.70323	0	2.3941	OK	0.852547	0	2.68874	OK	0.376634	0	1.55509	OK
YBR233W	YBR233W	PBP2	II:683372-684669	3.02658	1.71233	4.34083	OK	5.1865	3.36913	7.00387	OK	5.09313	3.30247	6.88378	OK	4.67733	2.98228	6.37238	OK
YBR233W-A	YBR233W-A	DAD3	II:684976-685261	36.1404	22.4339	49.8469	OK	29.4131	17.263	41.5632	OK	29.5449	17.5179	41.5719	OK	31.4999	19.226	43.7738	OK
YBR234C	YBR234C	ARC40	II:685437-686592	23.3678	17.493	29.2426	OK	46.8675	36.024	57.7111	OK	36.5687	27.9637	45.1737	OK	41.7477	32.0745	51.4208	OK
YBR235W	YBR235W	-	II:686900-690263	49.1659	38.1359	60.1958	OK	86.3777	66.2502	106.505	OK	51.2257	39.7177	62.7338	OK	70.5706	54.3742	86.7669	OK
YBR236C	YBR236C	ABD1	II:690382-691693	46.6568	36.0485	57.2651	OK	52.8415	40.9019	64.7811	OK	42.8275	33.0335	52.6215	OK	51.9535	40.2034	63.7035	OK
YBR237W	YBR237W	PRP5	II:691968-694518	29.1905	22.5657	35.8152	OK	34.4611	26.7679	42.1544	OK	24.5876	19.0297	30.1455	OK	32.7156	25.4295	40.0017	OK
YBR238C	YBR238C	-	II:695106-697302	37.7109	29.2023	46.2194	OK	4.82074	3.3887	6.25277	OK	28.9323	22.3765	35.4882	OK	7.55168	5.5005	9.60286	OK
YBR239C	YBR239C	ERT1	II:698353-699943	4.53898	3.01692	6.06103	OK	2.20579	1.2437	3.16788	OK	4.3502	2.8906	5.80979	OK	2.47472	1.46326	3.48618	OK
YBR240C	YBR240C	THI2	II:700489-701842	3.70481	2.28729	5.12232	OK	5.50701	3.69317	7.32084	OK	6.25954	4.27211	8.24697	OK	9.09554	6.47986	11.7112	OK
YBR241C	YBR241C	-	II:702588-704055	13.1993	9.70022	16.6984	OK	44.8904	34.7456	55.0351	OK	23.5996	17.9187	29.2806	OK	44.5384	34.4687	54.6082	OK
YBR242W	YBR242W	-	II:704669-705386	30.6197	22.4728	38.7667	OK	12.5512	8.48926	16.6132	OK	20.1327	14.2681	25.9972	OK	16.6438	11.7001	21.5874	OK
YBR243C	YBR243C	ALG7	II:705446-706793	42.4095	32.6522	52.1667	OK	44.8546	34.6364	55.0728	OK	41.3116	31.7936	50.8296	OK	38.6387	29.7653	47.5122	OK
YBR244W	YBR244W	GPX2	II:707527-708016	137.743	105.204	170.283	OK	182.254	141.004	223.505	OK	109.825	83.9952	135.655	OK	167.542	129.337	205.747	OK
YBR245C	YBR245C	ISW1	II:708149-711539	36.5424	28.3435	44.7413	OK	32.9101	25.5927	40.2276	OK	24.2988	18.8729	29.7248	OK	23.2569	18.0627	28.4512	OK
YBR246W	YBR246W	RRT2	II:711590-712754	25.8719	19.4562	32.2875	OK	19.039	14.0523	24.0256	OK	20.8649	15.5243	26.2055	OK	17.9037	13.2167	22.5907	OK
YBR247C	YBR247C	ENP1	II:713003-714455	58.6948	45.588	71.8016	OK	2.73441	1.60743	3.86139	OK	36.3853	28.0297	44.7409	OK	7.23229	5.09942	9.36516	OK
YBR248C	YBR248C	HIS7	II:714806-716465	61.4988	47.8176	75.1799	OK	45.5557	35.331	55.7805	OK	51.919	40.3023	63.5358	OK	42.109	32.6074	51.6106	OK
YBR249C	YBR249C	ARO4	II:716881-717994	108.074	84.0267	132.122	OK	41.9245	32.161	51.688	OK	116.264	90.4018	142.125	OK	64.344	49.8151	78.8729	OK
YBR250W	YBR250W	SPO23	II:719032-720604	2.55846	1.50098	3.61595	OK	2.12715	1.18184	3.07245	OK	4.25023	2.80039	5.70006	OK	3.55116	2.2586	4.84373	OK
YBR251W	YBR251W	MRPS5	II:721389-722313	23.8987	17.6436	30.1537	OK	23.6338	17.4239	29.8437	OK	18.0226	13.0346	23.0105	OK	22.9235	16.8705	28.9766	OK
YBR252W	YBR252W	DUT1	II:722610-723054	50.4344	36.1188	64.7499	OK	34.2816	24.2248	44.3385	OK	27.5994	19.0233	36.1755	OK	23.2502	15.5322	30.9682	OK
YBR253W	YBR253W	SRB6	II:723269-723635	17.551	10.3611	24.7409	OK	23.8071	15.0197	32.5944	OK	11.8142	6.07481	17.5536	OK	16.7623	9.85008	23.6745	OK
YBR254C	YBR254C	TRS20	II:723735-724263	38.7054	27.9095	49.5013	OK	26.6502	18.7499	34.5504	OK	29.5705	20.9513	38.1897	OK	29.1184	20.7156	37.5212	OK
YBR255C-A	YBR255C-A	-	II:726617-727074	12.5975	6.50859	18.6864	OK	10.7575	5.10776	16.4072	OK	17.9544	10.5713	25.3375	OK	16.9612	9.96131	23.9612	OK
YBR255W	YBR255W	MTC4	II:724455-726540	21.5216	16.5089	26.5343	OK	19.6548	15.0498	24.2599	OK	23.3898	18.0091	28.7704	OK	23.2887	17.9238	28.6535	OK
YBR256C	YBR256C	RIB5	II:727385-728102	67.7186	51.4081	84.0292	OK	102.971	79.4629	126.48	OK	122.705	95.0891	150.322	OK	142.805	111.042	174.569	OK
YBR257W	YBR257W	POP4	II:728884-729724	10.2276	6.9016	13.5537	OK	6.09229	3.73033	8.45424	OK	11.2948	7.74488	14.8446	OK	8.23099	5.37192	11.0901	OK
YBR258C	YBR258C	SHG1	II:729733-730162	21.8592	14.3498	29.3687	OK	23.7239	15.7786	31.6693	OK	21.1252	13.8228	28.4276	OK	29.6684	20.4936	38.8431	OK
YBR259W	YBR259W	-	II:730386-732453	21.6062	16.5916	26.6208	OK	16.6143	12.6294	20.5991	OK	17.1206	13.0331	21.2081	OK	16.0857	12.2063	19.9651	OK
YBR260C	YBR260C	RGD1	II:732638-734639	36.0515	27.9382	44.1649	OK	41.9414	32.589	51.2938	OK	36.6429	28.4112	44.8746	OK	36.9595	28.6622	45.2567	OK
YBR261C	YBR261C	TAE1	II:734831-735530	31.9245	23.3996	40.4495	OK	28.8848	21.0605	36.7092	OK	29.0841	21.2604	36.9078	OK	26.3205	19.0859	33.5552	OK
YBR262C	YBR262C	AIM5	II:735719-736040	19.1376	10.7084	27.5667	OK	23.8985	14.2828	33.5142	OK	17.7375	9.72148	25.7535	OK	18.2775	10.1911	26.364	OK
YBR263W	YBR263W	SHM1	II:736263-737736	114.879	89.0975	140.661	OK	90.908	70.6342	111.182	OK	112.079	87.0144	137.144	OK	99.9808	77.6956	122.266	OK
YBR264C	YBR264C	YPT10	II:737769-738369	26.5246	18.9317	34.1175	OK	26.5197	18.9039	34.1355	OK	21.0909	14.7356	27.4462	OK	24.0059	17.1654	30.8464	OK
YBR265W	YBR265W	TSC10	II:738581-739544	22.0307	16.1997	27.8618	OK	20.6156	15.0886	26.1426	OK	12.3437	8.66203	16.0254	OK	12.7737	9.10855	16.4388	OK
YBR266C	YBR266C	SLM6	II:739840-741022	0.592598	0	3.04449	OK	0.111993	0	0.703614	OK	0.65491	0	2.60592	OK	0	0	0	OK
YBR267W	YBR267W	REI1	II:739840-741022	52.7569	40.7442	64.7695	OK	4.20762	2.59824	5.817	OK	26.7658	20.1978	33.3338	OK	9.26973	6.52392	12.0155	OK
YBR268W	YBR268W	MRPL37	II:741298-741616	42.7429	28.4286	57.0573	OK	49.2145	33.7692	64.6598	OK	40.0347	26.8077	53.2618	OK	49.3342	34.0024	64.6659	OK
YBR269C	YBR269C	FMP21	II:742159-742576	11.867	6.58656	17.1474	OK	28.3098	19.2441	37.3755	OK	23.7529	15.7469	31.7588	OK	39.522	28.1822	50.8618	OK
YBR270C	YBR270C	BIT2	II:742760-744398	13.8191	10.2622	17.376	OK	10.0692	7.31475	12.8237	OK	12.498	9.23781	15.7582	OK	11.8868	8.75143	15.0221	OK
YBR271W	YBR271W	-	II:744851-746111	30.0214	22.8338	37.209	OK	4.57093	2.90234	6.23952	OK	21.9883	16.4771	27.4994	OK	11.2644	8.08842	14.4404	OK
YBR272C	YBR272C	HSM3	II:746360-747803	27.4103	20.9227	33.8979	OK	35.5933	27.4009	43.7857	OK	29.4562	22.5384	36.3741	OK	39.1997	30.226	48.1734	OK
YBR273C	YBR273C	UBX7	II:748060-749371	23.0995	17.4137	28.7852	OK	37.0435	28.4759	45.6111	OK	25.3097	19.1708	31.4486	OK	34.7869	26.696	42.8778	OK
YBR274W	YBR274W	CHK1	II:749593-751177	24.1673	18.4099	29.9248	OK	22.3998	17.0205	27.7792	OK	21.5115	16.3307	26.6924	OK	25.4071	19.423	31.3912	OK
YBR275C	YBR275C	RIF1	II:751355-757106	46.2793	35.3023	57.2562	OK	42.3415	32.5434	52.1396	OK	34.6694	26.8119	42.5269	OK	34.3752	26.5919	42.1585	OK
YBR276C	YBR276C	PPS1	II:757619-760043	55.1064	42.8517	67.361	OK	61.1845	47.5425	74.8266	OK	51.9333	40.3765	63.49	OK	49.8058	38.7238	60.8878	OK
YBR277C	YBR277C	-	II:760214-760899	1.21993	0	3.66222	OK	0.619686	0	2.59595	OK	0.708477	0	2.28783	OK	0	0	0	OK
YBR278W	YBR278W	DPB3	II:760214-760899	26.6791	18.9609	34.3972	OK	36.2857	26.487	46.0845	OK	30.0064	21.6251	38.3877	OK	40.009	29.4697	50.5483	OK
YBR279W	YBR279W	PAF1	II:761256-762594	39.3802	30.3255	48.4349	OK	37.7443	29.0421	46.4465	OK	29.0608	22.1717	35.9498	OK	32.8865	25.1941	40.579	OK
YBR280C	YBR280C	SAF1	II:762783-764697	8.73952	6.37144	11.1076	OK	31.8455	24.6209	39.0702	OK	18.6875	14.2057	23.1693	OK	36.3899	28.2111	44.5687	OK
YBR281C	YBR281C	DUG2	II:764969-767606	38.2	29.6957	46.7043	OK	33.7698	26.2594	41.2802	OK	35.4154	27.5298	43.3009	OK	27.2815	21.1609	33.4021	OK
YBR282W	YBR282W	MRPL27	II:768239-768680	24.0253	16.1179	31.9327	OK	34.7763	24.3664	45.1862	OK	23.0623	15.4091	30.7155	OK	29.474	20.4937	38.4542	OK
YBR283C	YBR283C	SSH1	II:768942-770415	355.666	266.52	444.811	OK	215.656	165.124	266.187	OK	323.758	244.802	402.714	OK	206.149	158.015	254.283	OK
YBR284W	YBR284W	-	II:771238-773632	4.87951	3.46268	6.29634	OK	5.06015	3.5839	6.53641	OK	12.5661	9.49982	15.6323	OK	13.9059	10.5653	17.2465	OK
YBR285W	YBR285W	-	II:773921-774356	0.451354	0	1.68387	OK	9.30928	4.86457	13.754	OK	3.2871	0.74316	5.83105	OK	13.1658	7.82511	18.5064	OK
YBR286W	YBR286W	APE3	II:774699-776313	574.557	420.673	728.442	OK	654.192	476.693	831.692	OK	648.585	472.735	824.434	OK	666.322	484.669	847.975	OK
YBR287W	YBR287W	-	II:776570-777854	61.6549	47.8258	75.4839	OK	117.848	91.6211	144.075	OK	81.8005	63.612	99.989	OK	110.243	85.7243	134.762	OK
YBR288C	YBR288C	APM3	II:778011-779463	30.9172	23.7181	38.1163	OK	21.3159	16.0974	26.5344	OK	22.5166	17.0526	27.9806	OK	16.7413	12.4832	20.9993	OK
YBR289W	YBR289W	SNF5	II:779666-782384	15.2521	11.6038	18.9004	OK	12.7797	9.71252	15.847	OK	10.5827	7.96348	13.202	OK	10.1132	7.60711	12.6194	OK
YBR290W	YBR290W	BSD2	II:782590-783556	60.9682	47.0143	74.9221	OK	69.8943	54.0486	85.74	OK	64.7394	49.9971	79.4818	OK	73.0464	56.5	89.5928	OK
YBR291C	YBR291C	CTP1	II:783672-784572	9.06052	6.05694	12.0641	OK	7.28754	4.70897	9.86612	OK	7.65034	4.99883	10.3018	OK	6.32379	3.97243	8.67515	OK
YBR292C	YBR292C	-	II:784701-785073	0.684751	0	1.95198	OK	0.298351	0	1.19659	OK	0.900377	0	2.44835	OK	0	0	0	OK
YBR293W	YBR293W	VBA2	II:787005-788430	18.5985	13.8638	23.3332	OK	18.6057	13.9184	23.293	OK	18.2082	13.6242	22.7923	OK	21.0278	15.8325	26.2231	OK
YBR294W	YBR294W	SUL1	II:789234-791814	0.271508	0.0138151	0.529201	OK	0.48697	0.149682	0.824258	OK	0.844019	0.399077	1.28896	OK	1.18514	0.648041	1.72224	OK
YBR295W	YBR295W	PCA1	II:792848-796499	34.1077	26.5183	41.6972	OK	46.6491	36.1638	57.1344	OK	36.7899	28.6064	44.9733	OK	53.222	41.1813	65.2628	OK
YBR296C	YBR296C	PHO89	II:796797-798522	5.99907	4.22759	7.77055	OK	1.01996	0.417071	1.62284	OK	4.97938	3.42704	6.53172	OK	3.83149	2.53284	5.13015	OK
YBR296C-A	YBR296C-A	-	II:800122-800242	0	0	0	OK	0	0	0	OK	0	0	0	OK	0	0	0	OK
YBR297W	YBR297W	MAL33	II:800522-801929	5.43108	3.65411	7.20804	OK	7.0822	4.95728	9.20712	OK	9.84528	7.05903	12.6315	OK	11.4638	8.32762	14.6	OK
YBR298C	YBR298C	MAL31	II:802630-804475	7.05969	5.0592	9.06017	OK	5.31872	3.72911	6.90833	OK	8.33834	6.0299	10.6468	OK	7.70484	5.5442	9.86548	OK
YBR298C-A	YBR298C-A	-	II:805034-805256	0	0	0	OK	0	0	0	OK	1.10949	0	2.48028	OK	0	0	0	OK
YBR299W	YBR299W	MAL32	II:805350-807105	0.54911	0.105253	0.992968	OK	1.17328	0.528691	1.81786	OK	1.02585	0.418721	1.63298	OK	2.22482	1.31778	3.13186	OK
YBR300C	YBR300C	-	II:808599-809419	0.357032	0	1.21446	OK	0.228937	0	1.08395	OK	0.731143	0	1.92866	OK	0.22542	0	0.785633	OK
YBR301W	YBR301W	PAU24	II:808599-809419	0.605349	0	2.27924	OK	0.610089	0	1.92493	OK	1.4933	0	3.48836	OK	0	0	0	OK
YBR302C	YBR302C	COS2	II:810339-811479	5.00622	3.15404	6.85839	OK	10.3729	7.26244	13.4834	OK	8.95203	6.26403	11.64	OK	14.9081	10.8147	19.0014	OK
YCL001W	YCL001W	RER1	III:111915-112482	87.9641	65.7456	110.183	OK	68.6458	51.7547	85.5368	OK	71.2663	53.9243	88.6083	OK	69.8072	52.8126	86.8018	OK
YCL001W-A	YCL001W-A	-	III:113079-113541	4.49497	1.52929	7.46065	OK	4.06725	1.32928	6.80522	OK	3.57825	1.01446	6.14204	OK	5.54101	2.36605	8.71596	OK
YCL001W-B	YCL001W-B	-	III:113769-114024	3.52053	0	8.40668	OK	3.80693	0	8.63435	OK	3.00148	0	6.98108	OK	2.97294	0.701174	5.24471	OK
YCL002C	YCL002C	-	III:110807-111675	46.5661	35.0694	58.0627	OK	19.0371	13.6198	24.4544	OK	33.1393	24.6087	41.67	OK	19.6962	14.1282	25.2641	OK
YCL004W	YCL004W	PGS1	III:109104-110670	11.3195	8.26451	14.3746	OK	9.91874	7.18163	12.6559	OK	9.1709	6.56667	11.7751	OK	12.1042	8.88996	15.3184	OK
YCL005W	YCL005W	LDB16	III:108020-108791	25.1416	18.3007	31.9825	OK	14.7668	10.3366	19.197	OK	21.8854	15.8051	27.9658	OK	19.2294	13.7236	24.7352	OK
YCL005W-A	YCL005W-A	VMA9	III:106973-107417	94.6075	62.7775	126.437	OK	86.843	57.1001	116.586	OK	87.7495	58.398	117.101	OK	78.0271	50.819	105.235	OK
YCL007C	YCL007C	-	III:106973-107417	0.962864	0	3.02343	OK	0.445153	0	1.61531	OK	0.820909	0	2.54969	OK	1.26358	0	3.31909	OK
YCL008C	YCL008C	STP22	III:105695-106853	7.23111	4.90949	9.55273	OK	7.32144	4.98965	9.65324	OK	8.38554	5.8203	10.9508	OK	8.49985	5.81158	11.1881	OK
YCL009C	YCL009C	ILV6	III:104618-105548	99.7988	77.3617	122.236	OK	116.465	90.246	142.685	OK	126.002	97.9238	154.08	OK	128.131	99.616	156.647	OK
YCL010C	YCL010C	SGF29	III:103570-104350	101.65	78.7544	124.545	OK	88.2273	68.1366	108.318	OK	80.6613	62.249	99.0736	OK	73.0393	56.2239	89.8547	OK
YCL011C	YCL011C	GBP2	III:102074-103358	162.76	126.038	199.482	OK	103.269	80.2998	126.238	OK	127.397	98.9343	155.861	OK	101.542	78.9212	124.163	OK
YCL012C	YCL012C	-	III:101316-101788	5.09437	1.6782	8.51055	OK	3.59363	0.665725	6.52154	OK	14.6291	8.54533	20.713	OK	11.8929	6.46005	17.3257	OK
YCL014W	YCL014W	BUD3	III:96280-101191	47.481	36.2974	58.6645	OK	34.5351	26.76	42.3101	OK	46.945	36.2238	57.6661	OK	36.4692	28.2797	44.6587	OK
YCL016C	YCL016C	DCC1	III:94620-95763	12.6627	9.05541	16.2699	OK	9.81084	6.93171	12.69	OK	9.62912	6.80138	12.4569	OK	9.51622	6.69487	12.3376	OK
YCL017C	YCL017C	NFS1	III:92776-94270	45.6203	35.3334	55.9073	OK	72.5436	56.4095	88.6776	OK	50.2489	38.9618	61.5359	OK	63.4469	49.3397	77.5541	OK
YCL018W	YCL018W	LEU2	III:91323-92418	0	0	0	OK	0	0	0	OK	53.1464	41.0038	65.2891	OK	28.5119	21.5072	35.5165	OK
YCL019W	YCL019W	-	III:85101-90415	0.162471	0.02544	0.299503	OK	0.141109	0.00671238	0.275506	OK	20.1174	15.6029	24.632	OK	16.0601	12.4578	19.6625	OK
YCL020W	YCL020W	-	III:85101-90415	0.0802272	0	0.369053	OK	0.145794	0	0.499286	OK	0.660337	0	3.25731	OK	0	0	0	OK
YCL021W-A	YCL021W-A	-	III:83619-83997	22.9279	14.4396	31.4161	OK	20.1055	12.4251	27.7858	OK	42.8536	30.2498	55.4573	OK	36.8595	25.5443	48.1746	OK
YCL022C	YCL022C	-	III:78948-82275	0.277957	0	1.91786	OK	0.492867	0	2.81131	OK	0.440686	0	1.96571	OK	0.428301	0	2.03989	OK
YCL023C	YCL023C	-	III:78948-82275	0.126879	0	1.2605	OK	0.125066	0	1.25326	OK	0	0	0	OK	0.977672	0	5.03276	OK
YCL024W	YCL024W	KCC4	III:78948-82275	27.8864	21.5831	34.1897	OK	26.2627	20.388	32.1373	OK	18.7515	14.4865	23.0164	OK	19.766	15.2851	24.2469	OK
YCL025C	YCL025C	AGP1	III:76017-77919	83.7069	64.8781	102.536	OK	1168.2	813.368	1523.03	OK	78.2492	60.8043	95.6942	OK	851.548	605.491	1097.6	OK
YCL026C-A	YCL026C-A	FRM2	III:74703-75285	0.578781	0	1.55675	OK	0.873558	0	2.00064	OK	2.10191	0.438245	3.76557	OK	1.94943	0.373036	3.52582	OK
YCL026C-B	YCL026C-B	HBN1	III:73404-73986	0.699344	0	1.67731	OK	1.4521	0.0717142	2.83249	OK	3.91056	1.62407	6.19704	OK	4.05926	1.71307	6.40545	OK
YCL027W	YCL027W	FUS1	III:71802-73341	8.75843	6.247	11.2699	OK	6.71441	4.71742	8.7114	OK	8.01893	5.70396	10.3339	OK	6.25122	4.36434	8.1381	OK
YCL028W	YCL028W	RNQ1	III:70149-71367	55.8288	43.1867	68.4709	OK	76.0724	59.1067	93.0381	OK	57.4979	44.5129	70.483	OK	62.7959	48.6727	76.919	OK
YCL029C	YCL029C	BIK1	III:68598-69921	23.0341	17.3452	28.7229	OK	16.5741	12.2767	20.8715	OK	16.1239	11.9188	20.329	OK	15.3371	11.2992	19.375	OK
YCL030C	YCL030C	HIS4	III:65933-68333	134.409	102.779	166.039	OK	195.731	147.865	243.598	OK	222.963	167.846	278.08	OK	162.991	123.8	202.181	OK
YCL031C	YCL031C	RRP7	III:64674-65568	96.5666	74.9064	118.227	OK	36.8771	27.8136	45.9406	OK	60.9941	46.9325	75.0557	OK	37.3293	28.1951	46.4635	OK
YCL032W	YCL032W	STE50	III:63440-64481	23.0017	17.0738	28.9295	OK	28.4956	21.4206	35.5706	OK	21.3676	15.8132	26.9219	OK	23.806	17.7239	29.8882	OK
YCL033C	YCL033C	MXR2	III:62775-63282	19.1819	12.7972	25.5666	OK	48.435	35.5305	61.3395	OK	29.1918	20.6524	37.7311	OK	57.4076	42.6387	72.1765	OK
YCL034W	YCL034W	LSB5	III:61657-62722	52.6052	40.5106	64.6998	OK	118.051	91.5718	144.531	OK	70.4313	54.5461	86.3165	OK	114.53	88.9177	140.143	OK
YCL035C	YCL035C	GRX1	III:60840-61173	46.9332	32.3114	61.5549	OK	127.955	95.2173	160.692	OK	122.802	91.5371	154.068	OK	283.223	218.562	347.883	OK
YCL036W	YCL036W	GFD2	III:59025-60726	49.1032	38.1368	60.0697	OK	2.90101	1.80457	3.99746	OK	21.7515	16.5586	26.9445	OK	3.61974	2.35476	4.88473	OK
YCL037C	YCL037C	SRO9	III:57373-58678	35.7998	27.376	44.2236	OK	3.47733	2.07857	4.8761	OK	43.7336	33.594	53.8733	OK	8.26126	5.82932	10.6932	OK
YCL038C	YCL038C	ATG22	III:54940-56527	24.0814	18.3648	29.798	OK	40.6307	31.4321	49.8293	OK	50.0954	38.8617	61.3291	OK	63.1004	49.0529	77.1479	OK
YCL039W	YCL039W	GID7	III:52644-54882	7.82109	5.71957	9.92261	OK	13.5741	10.2574	16.8908	OK	13.1423	9.91472	16.37	OK	16.3514	12.4666	20.2361	OK
YCL040W	YCL040W	GLK1	III:48652-52340	182.238	112.612	251.864	OK	600.927	403.769	798.085	OK	605.012	388.947	821.077	OK	870.718	576.73	1164.71	OK
YCL041C	YCL041C	-	III:48652-52340	10.5423	0	38.9121	OK	16.1195	0	79.8453	OK	23.5818	0	107.39	OK	14.9551	0	91.3171	OK
YCL042W	YCL042W	-	III:48652-52340	65.4242	0	175.611	OK	217.602	0	543.936	OK	249.294	0	617.702	OK	364.528	0	850.848	OK
YCL043C	YCL043C	PDI1	III:48652-52340	120.956	61.3117	180.6	OK	165.04	60.3314	269.748	OK	272.077	127.727	416.428	OK	214.625	58.9565	370.293	OK
YCL044C	YCL044C	MGR1	III:47110-48364	3.57955	2.14301	5.01608	OK	3.59763	2.16556	5.0297	OK	9.08441	6.3975	11.7713	OK	6.76051	4.61726	8.90377	OK
YCL045C	YCL045C	EMC1	III:44622-46963	72.1714	55.8838	88.4591	OK	68.463	53.0322	83.8937	OK	72.4418	56.0825	88.8011	OK	54.674	42.4876	66.8603	OK
YCL046W	YCL046W	-	III:44622-46963	0.148445	0	1.65928	OK	0.343551	0	3.41906	OK	0.825326	0	5.85661	OK	0.455106	0	3.31613	OK
YCL047C	YCL047C	POF1	III:43660-44437	17.7163	12.4376	22.9949	OK	23.4474	16.9861	29.9087	OK	18.7948	13.3823	24.2073	OK	26.6782	19.5748	33.7816	OK
YCL048W	YCL048W	SPS22	III:42164-43556	0.811335	0.204994	1.41768	OK	1.39814	0.585179	2.2111	OK	2.52957	1.4331	3.62604	OK	3.57007	2.21824	4.92189	OK
YCL048W-A	YCL048W-A	-	III:41487-41727	0.303889	0	1.55618	OK	9.88314	1.93213	17.8342	OK	9.14744	1.65527	16.6396	OK	16.3074	6.15253	26.4623	OK
YCL049C	YCL049C	-	III:39785-40724	19.8603	14.4385	25.282	OK	26.3838	19.6059	33.1616	OK	43.7142	33.3364	54.092	OK	42.1291	32.086	52.1722	OK
YCL050C	YCL050C	APA1	III:37835-38801	20.4243	14.9675	25.8811	OK	22.4418	16.5063	28.3772	OK	26.8763	20.0387	33.714	OK	21.3112	15.6613	26.9611	OK
YCL051W	YCL051W	LRE1	III:35864-37616	4.11666	2.75809	5.47524	OK	6.42448	4.54272	8.30625	OK	4.90437	3.37832	6.43041	OK	5.80717	4.08799	7.52634	OK
YCL052C	YCL052C	PBN1	III:34142-35393	34.149	26.0893	42.2088	OK	62.2812	48.2829	76.2795	OK	40.9529	31.5134	50.3925	OK	60.5801	46.9776	74.1825	OK
YCL054W	YCL054W	SPB1	III:31448-33974	103.146	79.1569	127.135	OK	6.11618	4.44077	7.7916	OK	56.3087	43.7522	68.8653	OK	14.8292	11.3227	18.3357	OK
YCL055W	YCL055W	KAR4	III:27928-28936	41.4178	31.5844	51.2512	OK	34.5302	26.1362	42.9242	OK	48.5737	37.2614	59.886	OK	43.8197	33.4681	54.1713	OK
YCL056C	YCL056C	PEX34	III:26924-27359	20.7988	13.5594	28.0382	OK	21.9422	14.4688	29.4157	OK	19.8267	12.834	26.8193	OK	20.5618	13.4464	27.6771	OK
YCL057C-A	YCL057C-A	MOS1	III:24031-24325	12.9328	5.38335	20.4822	OK	15.4573	7.36947	23.5452	OK	18.3368	9.53873	27.1349	OK	22.0539	12.3993	31.7084	OK
YCL057W	YCL057W	PRD1	III:24767-26906	81.3737	63.1082	99.6392	OK	159.35	121.672	197.029	OK	151.423	115.809	187.038	OK	163.119	124.421	201.818	OK
YCL058C	YCL058C	FYV5	III:23522-23981	4.7793	0.680719	8.87789	OK	0.68032	0	1.80942	OK	4.30965	0.843541	7.77576	OK	1.86528	0	3.77014	OK
YCL058W-A	YCL058W-A	ADF1	III:23522-23981	44.8224	30.0934	59.5515	OK	2.02061	0	4.64586	OK	24.4176	14.6789	34.1564	OK	5.45497	1.27191	9.63803	OK
YCL059C	YCL059C	KRR1	III:22428-23379	90.8742	70.5133	111.235	OK	12.1709	8.557	15.7848	OK	66.1359	51.068	81.2039	OK	25.8475	19.2135	32.4815	OK
YCL061C	YCL061C	MRC1	III:18815-22106	41.8335	32.2128	51.4542	OK	40.9083	31.7908	50.0258	OK	29.2613	22.754	35.7687	OK	30.2057	23.4934	36.9179	OK
YCL063W	YCL063W	VAC17	III:17289-18561	36.514	28.0151	45.0128	OK	34.9181	26.7641	43.072	OK	25.2709	19.0949	31.4469	OK	29.0308	22.0882	35.9734	OK
YCL064C	YCL064C	CHA1	III:15797-16880	116.394	90.4812	142.306	OK	642.06	478.929	805.19	OK	39.3462	30.082	48.6105	OK	331.047	252.761	409.333	OK
YCL065W	YCL065W	-	III:13281-14119	1.17584	0	3.16695	OK	0.585875	0	1.86274	OK	0.278356	0	1.0207	OK	1.04357	0	2.44395	OK
YCL066W	YCL066W	HMLALPHA1	III:13281-14119	0	0	0	OK	0	0	0	OK	0	0	0	OK	0	0	0	OK
YCL067C	YCL067C	HMLALPHA2	III:12385-13018	0	0	0	OK	0	0	0	OK	0	0	0	OK	0	0	0	OK
YCL068C	YCL068C	-	III:11502-12285	0.24071	0	0.779313	OK	0.0757565	0	0.398207	OK	0.272085	0	0.762287	OK	0.423116	0	1.07353	OK
YCL069W	YCL069W	VBA3	III:9705-11082	0.101742	0	0.376264	OK	0.0193744	0	0.197086	OK	0.0484772	0	0.226033	OK	0	0	0	OK
YCL073C	YCL073C	GEX1	III:6478-8326	0.218592	0	0.498141	OK	0.245955	0	0.525371	OK	0.529309	0.111864	0.946754	OK	0.712481	0.230798	1.19416	OK
YCL074W	YCL074W	-	III:2823-3750	0.0306733	0	0.300398	OK	0.108538	0	0.396069	OK	0.800625	0.051598	1.54965	OK	0.732253	0	1.48012	OK
YCL075W	YCL075W	-	III:1391-2566	0	0	0	OK	0	0	0	OK	0.807062	0	2.20423	OK	1.86279	0	3.88778	OK
YCL076W	YCL076W	-	III:1391-2566	0	0	0	OK	0	0	0	OK	0.235113	0	0.972232	OK	0.189091	0	0.688826	OK
YCR001W	YCR001W	-	III:115684-115999	0	0	0	OK	0	0	0	OK	0	0	0	OK	0	0	0	OK
YCR002C	YCR002C	CDC10	III:117379-118348	30.5329	22.9175	38.1484	OK	47.6108	36.4652	58.7563	OK	32.3475	24.3751	40.3199	OK	45.6359	34.9273	56.3445	OK
YCR003W	YCR003W	MRPL32	III:118619-119171	34.5396	24.9195	44.1596	OK	43.284	31.764	54.804	OK	30.1737	21.6165	38.731	OK	39.4416	28.7655	50.1177	OK
YCR004C	YCR004C	YCP4	III:119574-120318	84.3748	64.7097	104.04	OK	175.578	136.245	214.91	OK	109.345	84.6841	134.007	OK	149.89	116.558	183.222	OK
YCR005C	YCR005C	CIT2	III:120945-122328	60.5901	47.0359	74.1443	OK	1761.06	1221.31	2300.8	OK	105.662	82.0981	129.226	OK	1134.09	808.678	1459.49	OK
YCR006C	YCR006C	-	III:122529-123003	37.7089	26.9411	48.4768	OK	20.3071	13.5106	27.1035	OK	23.8735	16.3619	31.385	OK	16.4276	10.5461	22.3091	OK
YCR007C	YCR007C	-	III:126010-126730	5.34882	2.96063	7.73702	OK	8.45812	5.31729	11.599	OK	8.99179	5.71478	12.2688	OK	15.175	10.5627	19.7874	OK
YCR008W	YCR008W	SAT4	III:128469-130281	88.569	68.6775	108.46	OK	70.68	54.9471	86.4129	OK	54.7925	42.6001	66.9849	OK	49.6504	38.6079	60.693	OK
YCR009C	YCR009C	RVS161	III:130744-131542	117.293	91.0486	143.537	OK	172.917	134.453	211.382	OK	110.037	85.3352	134.739	OK	133.997	104.059	163.935	OK
YCR010C	YCR010C	ADY2	III:132272-133124	1.18381	0.20691	2.1607	OK	2.1584	0.833176	3.48362	OK	0.977387	0.0809191	1.87386	OK	2.06534	0.755295	3.37538	OK
YCR011C	YCR011C	ADP1	III:133723-136873	145.015	109.567	180.464	OK	248.463	183.156	313.769	OK	182.719	136.858	228.58	OK	217.87	161.826	273.914	OK
YCR012W	YCR012W	PGK1	III:137745-139049	2207	1508.4	2905.59	OK	2245.04	1544.64	2945.43	OK	2774.84	1887.65	3662.03	OK	2099.35	1449.84	2748.85	OK
YCR013C	YCR013C	-	III:137745-139049	6.95988	0	64.9926	OK	4.53065	0	51.3812	OK	4.00655	0	54.1789	OK	3.98388	0	45.8927	OK
YCR014C	YCR014C	POL4	III:139184-140933	57.8815	44.9856	70.7774	OK	31.1502	24.0082	38.2922	OK	44.2185	34.3077	54.1292	OK	24.1448	18.4994	29.7902	OK
YCR015C	YCR015C	-	III:141216-142170	74.5501	57.6655	91.4347	OK	49.9976	38.347	61.6482	OK	55.9812	43.0332	68.9291	OK	45.9375	35.1396	56.7353	OK
YCR016W	YCR016W	-	III:143633-144506	46.1936	35.1741	57.2131	OK	8.65876	5.7264	11.5911	OK	28.9053	21.4563	36.3543	OK	12.0639	8.42251	15.7053	OK
YCR017C	YCR017C	CWH43	III:144772-147634	128.939	98.0998	159.777	OK	118.866	90.7125	147.02	OK	131.42	99.9647	162.874	OK	103.174	79.1168	127.23	OK
YCR018C	YCR018C	SRD1	III:148237-148903	29.0481	21.0192	37.0769	OK	30.1961	21.9897	38.4026	OK	31.5579	23.0858	40.03	OK	27.7585	20.1284	35.3886	OK
YCR018C-A	YCR018C-A	-	III:151607-151862	3.69571	0	8.58185	OK	5.01517	0	10.4124	OK	4.53216	0	9.6698	OK	2.22971	0	4.50147	OK
YCR019W	YCR019W	MAK32	III:152836-153928	15.5087	11.2386	19.7788	OK	15.1029	10.9434	19.2624	OK	13.4536	9.64978	17.2574	OK	12.8858	9.21727	16.5544	OK
YCR020C	YCR020C	PET18	III:154011-154659	3.59836	1.53045	5.66628	OK	2.64309	0.888614	4.39756	OK	5.92265	3.2388	8.60651	OK	5.25503	2.76755	7.74252	OK
YCR020C-A	YCR020C-A	MAK31	III:154829-155096	72.8388	50.0211	95.6565	OK	69.7659	47.8259	91.7059	OK	66.6877	45.6465	87.7289	OK	98.7712	70.3168	127.226	OK
YCR020W-B	YCR020W-B	HTL1	III:155319-155556	120.676	84.9808	156.37	OK	59.3947	37.3758	81.4137	OK	105.102	73.7244	136.48	OK	74.7832	50.0118	99.5547	OK
YCR021C	YCR021C	HSP30	III:156108-157107	149.815	115.549	184.081	OK	79.7637	61.794	97.7335	OK	195.141	151.251	239.031	OK	105.689	82.0609	129.317	OK
YCR022C	YCR022C	-	III:157420-157765	0.400718	0	1.69927	OK	0	0	0	OK	0.734933	0	2.12129	OK	0	0	0	OK
YCR023C	YCR023C	-	III:158537-160373	47.5147	36.9414	58.0881	OK	59.3436	46.1592	72.5281	OK	44.9974	34.952	55.0429	OK	54.7163	42.5325	66.9001	OK
YCR024C	YCR024C	SLM5	III:160743-162222	11.7308	8.55817	14.9034	OK	13.2255	9.72832	16.7227	OK	10.8781	7.89686	13.8593	OK	12.5985	9.24743	15.9495	OK
YCR024C-A	YCR024C-A	PMP1	III:162944-163067	175.749	41.7793	309.718	OK	123.266	14.7641	231.768	OK	248.3	94.6071	401.993	OK	143.788	31.2425	256.333	OK
YCR024C-B	YCR024C-B	-	III:162598-162865	655.314	508.289	802.34	OK	506.209	390.357	622.06	OK	644.005	499.858	788.152	OK	459.647	355.042	564.252	OK
YCR025C	YCR025C	-	III:163445-163856	6.66487	2.72361	10.6061	OK	1.43468	0	2.9906	OK	3.91855	0.984563	6.85253	OK	0.604148	0	1.60304	OK
YCR026C	YCR026C	NPP1	III:164110-166339	91.8163	71.0443	112.588	OK	79.2233	61.4215	97.0251	OK	80.6137	62.4983	98.7291	OK	79.8359	61.9121	97.7596	OK
YCR027C	YCR027C	RHB1	III:167369-167999	20.0889	14.0134	26.1645	OK	15.3978	10.4457	20.35	OK	12.2791	8.05191	16.5063	OK	10.9797	7.02638	14.9331	OK
YCR028C	YCR028C	FEN2	III:170885-172424	59.9166	46.4925	73.3408	OK	37.1415	28.6542	45.6288	OK	49.2375	38.181	60.294	OK	40.88	31.594	50.166	OK
YCR028C-A	YCR028C-A	RIM1	III:172949-173440	19.1452	11.9362	26.3542	OK	23.7084	15.5278	31.8891	OK	18.7809	11.8165	25.7454	OK	20.5819	13.2064	27.9574	OK
YCR030C	YCR030C	SYP1	III:173825-176438	10.7685	8.08157	13.4555	OK	15.8554	12.1241	19.5867	OK	14.1825	10.7944	17.5705	OK	14.6305	11.1732	18.0879	OK
YCR031C	YCR031C	RPS14A	III:177499-178220	267.579	207.42	327.737	OK	111.588	84.2122	138.963	OK	277.143	214.92	339.366	OK	108.161	81.6394	134.682	OK
YCR032W	YCR032W	BPH1	III:179519-186023	46.7902	35.6288	57.9515	OK	31.037	23.9519	38.1222	OK	41.7461	32.0352	51.457	OK	41.6632	31.9986	51.3278	OK
YCR033W	YCR033W	SNT1	III:186488-190169	40.0417	30.8413	49.2422	OK	36.4115	28.2516	44.5713	OK	24.9483	19.3798	30.5167	OK	25.626	19.9274	31.3245	OK
YCR034W	YCR034W	FEN1	III:190591-191635	79.0756	61.3387	96.8124	OK	25.0339	18.6822	31.3856	OK	54.6259	42.1009	67.151	OK	19.8814	14.6403	25.1225	OK
YCR035C	YCR035C	RRP43	III:191833-193018	57.4203	44.4086	70.4321	OK	29.8864	22.6856	37.0873	OK	40.8802	31.4089	50.3515	OK	31.5044	23.9605	39.0482	OK
YCR036W	YCR036W	RBK1	III:193296-194298	41.984	31.9729	51.9951	OK	72.1979	55.8987	88.4971	OK	67.0603	51.866	82.2545	OK	84.4333	65.5182	103.348	OK
YCR037C	YCR037C	PHO87	III:194413-197185	70.6299	54.6783	86.5815	OK	41.6124	32.3555	50.8693	OK	54.5893	42.3881	66.7905	OK	39.3616	30.6077	48.1155	OK
YCR038C	YCR038C	BUD5	III:197620-200178	4.94717	3.42599	6.46835	OK	5.21643	3.64492	6.78794	OK	6.1032	4.31677	7.88963	OK	5.78781	4.08331	7.4923	OK
YCR038W-A	YCR038W-A	-	III:197620-200178	0	0	0	OK	0	0	0	OK	0	0	0	OK	0	0	0	OK
YCR039C	YCR039C	MATALPHA2	III:197620-200178	0	0	0	OK	0	0	0	OK	0	0	0	OK	0	0	0	OK
YCR040W	YCR040W	MATALPHA1	III:200441-205397	0	0	0	OK	0	0	0	OK	0	0	0	OK	0	0	0	OK
YCR041W	YCR041W	-	III:200441-205397	8.62342	0	32.1348	OK	5.60703	0	22.7844	OK	2.69929	0	16.0852	OK	6.54439	0	26.3564	OK
YCR042C	YCR042C	TAF2	III:200441-205397	52.6361	40.5259	64.7463	OK	43.242	33.4499	53.0341	OK	53.9592	41.5968	66.3215	OK	51.1131	39.4404	62.7859	OK
YCR043C	YCR043C	-	III:206260-206644	55.1901	39.3511	71.0292	OK	44.2722	30.8678	57.6765	OK	39.5174	27.6899	51.3448	OK	49.2562	34.546	63.9664	OK
YCR044C	YCR044C	PER1	III:206876-207950	44.6046	34.0706	55.1386	OK	37.9002	28.8963	46.904	OK	38.459	29.3248	47.5933	OK	32.5748	24.7058	40.4438	OK
YCR045C	YCR045C	RRT12	III:208134-209610	0.481296	0	1.01965	OK	0.476897	0	0.957954	OK	0.681397	0	1.7292	OK	0.427518	0	0.866685	OK
YCR045W-A	YCR045W-A	-	III:208134-209610	33.3567	21.9227	44.7907	OK	17.6984	9.98362	25.4132	OK	9.86515	1.83438	17.8959	OK	11.2039	5.42869	16.9791	OK
YCR046C	YCR046C	IMG1	III:209913-210423	26.108	18.075	34.1411	OK	33.4052	23.6557	43.1547	OK	19.8789	13.4383	26.3195	OK	29.6327	20.9744	38.2911	OK
YCR047C	YCR047C	BUD23	III:210717-211545	15.8036	11.1752	20.4319	OK	2.53155	1.0697	3.9934	OK	12.0141	8.29976	15.7284	OK	5.55096	3.29035	7.81157	OK
YCR047W-A	YCR047W-A	-	III:210717-211545	0.433737	0	1.9379	OK	0	0	0	OK	0	0	0	OK	0	0	0	OK
YCR048W	YCR048W	ARE1	III:211870-213772	43.2628	33.552	52.9735	OK	36.2288	28.0383	44.4193	OK	50.9733	39.5884	62.3582	OK	42.7743	33.1808	52.3678	OK
YCR049C	YCR049C	-	III:211870-213772	0.857295	0	4.19576	OK	0.594728	0	3.22612	OK	0.5993	0	3.16753	OK	0.765013	0	3.23602	OK
YCR050C	YCR050C	-	III:211870-213772	0.519463	0	2.58347	OK	0.220594	0	1.52747	OK	0.878642	0	4.68351	OK	0	0	0	OK
YCR051W	YCR051W	-	III:214070-214739	57.438	43.4178	71.4583	OK	28.7636	20.8358	36.6914	OK	45.5481	34.0993	56.9968	OK	31.7835	23.2934	40.2736	OK
YCR052W	YCR052W	RSC6	III:214993-216445	23.6759	17.93	29.4217	OK	19.2447	14.4459	24.0434	OK	17.2007	12.8468	21.5546	OK	14.5515	10.7387	18.3643	OK
YCR053W	YCR053W	THR4	III:216696-218241	54.1266	41.9989	66.2544	OK	41.3458	31.9713	50.7202	OK	62.5678	48.5991	76.5365	OK	43.4433	33.6094	53.2772	OK
YCR054C	YCR054C	CTR86	III:218375-220067	21.3135	16.2249	26.4021	OK	6.9522	4.95642	8.94798	OK	14.7335	11.0099	18.4571	OK	9.7474	7.0855	12.4093	OK
YCR057C	YCR057C	PWP2	III:220456-223228	108.065	82.7983	133.331	OK	4.95104	3.55953	6.34255	OK	55.535	43.1129	67.957	OK	9.85306	7.41852	12.2876	OK
YCR059C	YCR059C	YIH1	III:223453-224230	49.7859	37.4791	62.0927	OK	32.1448	23.8358	40.4538	OK	43.2969	32.6127	53.981	OK	44.7005	33.7772	55.6237	OK
YCR060W	YCR060W	TAH1	III:224398-224734	12.9563	6.41272	19.4999	OK	9.05295	3.62639	14.4795	OK	13.5293	6.9782	20.0804	OK	12.9218	6.52605	19.3176	OK
YCR061W	YCR061W	-	III:225562-227458	5.79754	4.07484	7.52024	OK	11.6534	8.63741	14.6694	OK	14.8114	11.1457	18.4772	OK	16.2344	12.2623	20.2065	OK
YCR063W	YCR063W	BUD31	III:228094-228791	17.1635	10.7783	23.5487	OK	7.99168	3.91446	12.0689	OK	17.2995	10.9921	23.6068	OK	10.3411	5.95735	14.7249	OK
YCR064C	YCR064C	-	III:228094-228791	6.30999	1.79868	10.8213	OK	2.18274	0	4.99802	OK	1.88256	0	4.90597	OK	1.04055	0	2.64026	OK
YCR065W	YCR065W	HCM1	III:229309-231004	29.6833	22.7694	36.5972	OK	30.674	23.6166	37.7314	OK	21.4193	16.2967	26.5419	OK	20.8233	15.8341	25.8124	OK
YCR066W	YCR066W	RAD18	III:231499-232963	14.8099	10.9594	18.6603	OK	10.4583	7.54543	13.3712	OK	13.7556	10.1454	17.3658	OK	12.1281	8.87006	15.3862	OK
YCR067C	YCR067C	SED4	III:233124-236322	36.5475	28.3291	44.7659	OK	34.8382	27.0807	42.5958	OK	46.1285	35.8378	56.4192	OK	36.6698	28.508	44.8316	OK
YCR068W	YCR068W	ATG15	III:237213-238776	25.8899	19.7645	32.0154	OK	64.1047	49.8478	78.3616	OK	30.3875	23.3459	37.4291	OK	51.5425	39.9999	63.085	OK
YCR069W	YCR069W	CPR4	III:239054-240011	50.3688	38.6409	62.0967	OK	105.16	81.7299	128.59	OK	59.4703	45.8397	73.101	OK	75.9457	58.8255	93.0659	OK
YCR071C	YCR071C	IMG2	III:240102-240543	11.1837	6.28293	16.0845	OK	15.1415	9.31381	20.9692	OK	8.64557	4.41285	12.8783	OK	11.3869	6.49607	16.2777	OK
YCR072C	YCR072C	RSA4	III:240804-242352	55.345	42.9705	67.7195	OK	2.20631	1.23541	3.1772	OK	33.2881	25.6394	40.9368	OK	7.80905	5.53158	10.0865	OK
YCR073C	YCR073C	SSK22	III:242587-246583	28.4076	22.0585	34.7567	OK	27.9247	21.697	34.1524	OK	38.7653	30.0886	47.4421	OK	51.3042	39.6726	62.9358	OK
YCR073W-A	YCR073W-A	SOL2	III:246962-247910	23.6122	17.4091	29.8153	OK	32.9702	24.814	41.1264	OK	32.2671	24.2579	40.2763	OK	41.3391	31.4728	51.2055	OK
YCR075C	YCR075C	ERS1	III:248032-248815	18.841	13.296	24.3859	OK	25.6783	18.7435	32.6132	OK	15.5863	10.945	20.2276	OK	17.783	12.5856	22.9804	OK
YCR075W-A	YCR075W-A	-	III:248974-249202	14.5441	3.8209	25.2673	OK	29.5019	14.2502	44.7535	OK	17.1026	5.84855	28.3567	OK	31.4636	16.2964	46.6308	OK
YCR076C	YCR076C	-	III:249292-250045	22.3918	16.1134	28.6703	OK	35.5928	26.4858	44.6998	OK	28.8381	21.1951	36.481	OK	42.0557	31.6131	52.4984	OK
YCR077C	YCR077C	PAT1	III:250237-252628	31.9357	24.6828	39.1886	OK	31.8448	24.7015	38.9881	OK	24.5475	18.9669	30.128	OK	27.0878	20.9784	33.1972	OK
YCR079W	YCR079W	PTC6	III:252844-254173	20.7762	15.56	25.9924	OK	36.5769	28.1008	45.0531	OK	29.3582	22.4017	36.3147	OK	40.9394	31.562	50.3169	OK
YCR081C-A	YCR081C-A	-	III:254370-258654	0.886917	0	5.23473	OK	1.76395	0	8.56096	OK	2.58309	0	10.2484	OK	1.27971	0	6.31245	OK
YCR081W	YCR081W	SRB8	III:254370-258654	26.0098	20.1523	31.8673	OK	28.9292	22.4685	35.3899	OK	24.0701	18.7113	29.4289	OK	28.0989	21.8376	34.3602	OK
YCR082W	YCR082W	AHC2	III:258882-259269	69.8753	50.9368	88.8138	OK	93.0093	69.1213	116.897	OK	104.931	78.7252	131.136	OK	126.416	95.7651	157.067	OK
YCR083W	YCR083W	TRX3	III:259577-259961	34.8224	23.4752	46.1697	OK	50.6346	35.8627	65.4065	OK	62.1065	44.9669	79.2462	OK	98.5842	73.5134	123.655	OK
YCR084C	YCR084C	TUP1	III:260310-262452	30.0264	23.1264	36.9264	OK	24.517	18.888	30.1461	OK	26.7938	20.6921	32.8954	OK	20.6107	15.7946	25.4269	OK
YCR085W	YCR085W	-	III:262915-263269	1.27752	0	3.42271	OK	1.3661	0	3.50055	OK	0.897365	0	1.99907	OK	0.387832	0	1.23907	OK
YCR086W	YCR086W	CSM1	III:263391-263964	7.13869	3.92557	10.3518	OK	6.17707	3.22891	9.12523	OK	10.323	6.39766	14.2483	OK	8.62378	5.09564	12.1519	OK
YCR087C-A	YCR087C-A	-	III:263975-264491	46.6967	33.6486	59.7447	OK	8.83335	4.65103	13.0157	OK	28.9958	20.118	37.8736	OK	8.20016	4.19892	12.2014	OK
YCR087W	YCR087W	-	III:263975-264491	1.87319	0	4.49465	OK	0.62921	0	1.80608	OK	1.49839	0	3.75461	OK	0.73744	0	1.8711	OK
YCR088W	YCR088W	ABP1	III:265067-266846	20.9075	15.905	25.91	OK	41.8619	32.4118	51.312	OK	29.128	22.4076	35.8484	OK	38.2937	29.6356	46.9518	OK
YCR089W	YCR089W	FIG2	III:267433-272263	1.64678	1.12771	2.16586	OK	1.34631	0.895443	1.79717	OK	4.11114	3.03982	5.18246	OK	3.0244	2.18385	3.86494	OK
YCR090C	YCR090C	-	III:272314-272863	48.545	35.639	61.4509	OK	36.9258	26.7603	47.0913	OK	39.4184	28.7403	50.0965	OK	45.5131	33.538	57.4881	OK
YCR091W	YCR091W	KIN82	III:274403-276566	4.26431	2.93754	5.59109	OK	9.91035	7.33738	12.4833	OK	7.22058	5.24054	9.20062	OK	11.0922	8.2765	13.9078	OK
YCR092C	YCR092C	MSH3	III:276763-279820	26.7752	20.7545	32.7959	OK	15.7251	12.097	19.3531	OK	16.4864	12.7015	20.2713	OK	13.1556	10.0744	16.2369	OK
YCR093W	YCR093W	CDC39	III:280116-286443	124.751	90.9723	158.529	OK	97.8236	72.7204	122.927	OK	115.971	85.7409	146.202	OK	99.447	74.1802	124.714	OK
YCR094W	YCR094W	CDC50	III:286761-287937	30.3268	23.0153	37.6384	OK	25.213	18.9689	31.4571	OK	30.3677	23.052	37.6834	OK	24.753	18.6137	30.8922	OK
YCR095C	YCR095C	OCA4	III:288169-289258	29.3401	22.1015	36.5787	OK	21.9727	16.3177	27.6278	OK	28.271	21.2895	35.2525	OK	21.9339	16.1815	27.6863	OK
YCR095W-A	YCR095W-A	-	III:289638-289797	1.11254	0	3.18284	OK	6.59035	0	21.0033	OK	2.15075	0.0991491	4.20234	OK	6.02091	2.41722	9.6246	OK
YCR096C	YCR096C	HMRA2	III:293178-293538	0	0	0	OK	0	0	0	OK	0	0	0	OK	0	0	0	OK
YCR097W	YCR097W	HMRA1	III:293834-294321	119.732	89.7886	149.675	OK	162.702	124.299	201.105	OK	131.626	99.6584	163.594	OK	163.776	125.125	202.427	OK
YCR097W-A	YCR097W-A	-	III:294438-294705	0	0	0	OK	0	0	0	OK	0	0	0	OK	0	0	0	OK
YCR098C	YCR098C	GIT1	III:297048-298605	4.42951	2.92736	5.93166	OK	5.71668	3.94515	7.4882	OK	6.43347	4.50958	8.35736	OK	9.63853	6.95944	12.3176	OK
YCR099C	YCR099C	-	III:300831-302221	14.7308	5.92997	23.5316	OK	17.076	7.90125	26.2507	OK	17.1896	6.25432	28.125	OK	22.7274	10.9068	34.548	OK
YCR100C	YCR100C	-	III:300831-302221	15.7753	10.6079	20.9428	OK	18.6958	13.0059	24.3856	OK	20.2756	13.7459	26.8053	OK	22.5653	15.6798	29.4509	OK
YCR101C	YCR101C	-	III:302481-303030	22.9223	16.0393	29.8052	OK	21.3962	14.8344	27.958	OK	20.0877	13.8386	26.3369	OK	24.3611	16.9699	31.7522	OK
YCR102C	YCR102C	-	III:304360-305467	2.75903	1.46111	4.05695	OK	3.78154	2.24307	5.32001	OK	4.40911	2.71033	6.10789	OK	5.48673	3.52241	7.45105	OK
YCR102W-A	YCR102W-A	-	III:306734-306932	1.52666	0	3.91626	OK	2.59603	0	5.97386	OK	2.63695	0	5.93213	OK	4.27373	1.04163	7.50584	OK
YCR104W	YCR104W	PAU3	III:307800-308175	0.581058	0	1.83479	OK	0.447442	0	1.33563	OK	1.41227	0	3.28237	OK	0.702438	0	1.8218	OK
YCR105W	YCR105W	ADH7	III:309069-310155	0.826699	0.104083	1.54932	OK	1.4406	0.485504	2.3957	OK	1.29833	0.420529	2.17613	OK	2.15221	0.992483	3.31194	OK
YCR106W	YCR106W	RDS1	III:310957-313456	35.817	27.8401	43.7939	OK	30.9987	24.051	37.9465	OK	34.5973	26.8918	42.3029	OK	35.1562	27.3049	43.0076	OK
YCR107W	YCR107W	AAD3	III:313889-314981	23.0565	17.1799	28.933	OK	19.2623	14.2028	24.3218	OK	24.5828	18.3799	30.7858	OK	20.7082	15.3505	26.0659	OK
YCR108C	YCR108C	-	III:315996-316188	0	0	0	OK	0	0	0	OK	0	0	0	OK	0	0	0	OK
YDL001W	YDL001W	RMD1	IV:447983-449276	13.5079	9.83752	17.1783	OK	9.77281	6.9434	12.6022	OK	9.6959	6.90646	12.4853	OK	6.70175	4.60125	8.80226	OK
YDL002C	YDL002C	NHP10	IV:446966-447578	43.3035	32.0193	54.5878	OK	42.5866	31.5081	53.665	OK	35.7333	26.0993	45.3673	OK	38.0353	27.9921	48.0785	OK
YDL003W	YDL003W	MCD1	IV:444682-446383	50.5866	39.2624	61.9108	OK	52.5245	40.8355	64.2135	OK	30.1596	23.2307	37.0886	OK	30.0641	23.164	36.9642	OK
YDL004W	YDL004W	ATP16	IV:443028-443511	61.26	45.4151	77.1049	OK	103.288	78.6624	127.913	OK	82.9512	62.5595	103.343	OK	112.034	85.567	138.501	OK
YDL005C	YDL005C	MED2	IV:441013-442309	25.0531	18.8821	31.2241	OK	19.1855	14.3059	24.0651	OK	16.0866	11.8669	20.3063	OK	16.9546	12.5659	21.3432	OK
YDL006W	YDL006W	PTC1	IV:439908-440754	43.8374	33.1632	54.5116	OK	32.0443	23.905	40.1836	OK	29.4842	21.8645	37.1038	OK	31.7183	23.6586	39.778	OK
YDL007C-A	YDL007C-A	-	IV:436566-436824	0	0	0	OK	0	0	0	OK	0	0	0	OK	0	0	0	OK
YDL007W	YDL007W	RPT2	IV:438046-439360	205.558	158.298	252.817	OK	309.187	235.298	383.076	OK	352.644	267.215	438.073	OK	350.16	265.361	434.959	OK
YDL008W	YDL008W	APC11	IV:433496-433994	42.564	30.7535	54.3744	OK	46.7404	34.1033	59.3774	OK	34.7365	24.8114	44.6615	OK	52.0327	38.3567	65.7088	OK
YDL009C	YDL009C	-	IV:432307-433248	1.79639	0	4.72213	OK	1.86911	0	5.31268	OK	2.16051	0	5.59346	OK	3.34063	0	7.74413	OK
YDL010W	YDL010W	GRX6	IV:432307-433248	10.1061	6.49732	13.7149	OK	20.0231	14.2179	25.8283	OK	15.4994	10.6551	20.3437	OK	20.1117	14.1672	26.0563	OK
YDL011C	YDL011C	-	IV:432307-433248	0	0	0	OK	0.142729	0	1.01045	OK	0	0	0	OK	0.658438	0	2.31227	OK
YDL012C	YDL012C	-	IV:431107-431517	14.1949	7.02835	21.3615	OK	14.3303	7.20872	21.4518	OK	17.4283	9.6251	25.2315	OK	13.3625	6.68429	20.0408	OK
YDL013W	YDL013W	SLX5	IV:429066-430926	11.7063	8.67838	14.7342	OK	8.74762	6.35359	11.1417	OK	10.1048	7.4292	12.7804	OK	12.4389	9.26326	15.6145	OK
YDL014W	YDL014W	NOP1	IV:427363-428347	17.7161	12.8571	22.5752	OK	1.48421	0.48987	2.47855	OK	14.2064	10.1158	18.297	OK	2.96516	1.51562	4.4147	OK
YDL015C	YDL015C	TSC13	IV:426001-426934	170.496	131.096	209.896	OK	130.006	100.982	159.03	OK	167.781	130.37	205.192	OK	146.142	113.629	178.656	OK
YDL016C	YDL016C	-	IV:424208-425872	3.56573	0	10.4045	OK	1.11929	0	3.80022	OK	1.68499	0	5.90308	OK	2.01464	0	8.04004	OK
YDL017W	YDL017W	CDC7	IV:424208-425872	16.3237	12.1583	20.4892	OK	16.2718	12.1377	20.406	OK	17.4736	13.0846	21.8626	OK	17.3289	12.9621	21.6958	OK
YDL018C	YDL018C	ERP3	IV:422832-423510	40.5838	30.1097	51.058	OK	59.5833	45.1894	73.9773	OK	54.8193	41.4813	68.1573	OK	67.8164	51.808	83.8248	OK
YDL019C	YDL019C	OSH2	IV:417662-421514	68.2968	52.3626	84.231	OK	99.8315	75.8142	123.849	OK	78.5006	60.1144	96.8868	OK	82.162	62.8306	101.493	OK
YDL020C	YDL020C	RPN4	IV:415112-416708	50.5946	39.2547	61.9345	OK	51.7612	40.1897	63.3328	OK	82.0403	63.7825	100.298	OK	75.5745	58.7566	92.3925	OK
YDL021W	YDL021W	GPM2	IV:413952-414888	10.3966	7.1809	13.6123	OK	42.9189	32.6785	53.1594	OK	31.8837	23.95	39.8175	OK	45.3193	34.6239	56.0148	OK
YDL022C-A	YDL022C-A	-	IV:408450-410056	0.256904	0	1.45483	OK	0.710712	0	2.4067	OK	1.69332	0	4.62703	OK	3.06089	0	9.00131	OK
YDL022W	YDL022W	GPD1	IV:411760-413000	41.4623	31.7884	51.1361	OK	48.0359	37.0275	59.0444	OK	63.8109	49.3445	78.2774	OK	44.2977	34.0595	54.5358	OK
YDL023C	YDL023C	-	IV:411760-413000	3.47906	0	12.0949	OK	0.332965	0	2.23995	OK	4.03983	0	13.0602	OK	2.05929	0	7.54723	OK
YDL024C	YDL024C	DIA3	IV:408450-410056	3.57683	2.22406	4.92959	OK	7.51033	5.2729	9.74776	OK	8.51766	6.01115	11.0242	OK	10.5888	7.6207	13.5569	OK
YDL025C	YDL025C	RTK1	IV:405343-407206	27.5963	21.2265	33.9661	OK	55.0598	42.7808	67.3388	OK	47.1713	36.6773	57.6654	OK	58.9264	45.8277	72.0251	OK
YDL025W-A	YDL025W-A	-	IV:405343-407206	32.1696	28.8217	35.5176	OK	0	0	0	OK	99.7564	91.5579	107.955	OK	108.968	94.2542	123.682	OK
YDL026W	YDL026W	-	IV:403694-405060	0.339692	0	1.63014	OK	0.414844	0	2.42021	OK	0	0	0	OK	0.488723	0	2.22369	OK
YDL027C	YDL027C	-	IV:403694-405060	18.7737	13.9536	23.5938	OK	32.7357	25.0154	40.4561	OK	25.3459	19.1561	31.5358	OK	37.1901	28.5341	45.8461	OK
YDL028C	YDL028C	MPS1	IV:400996-403291	22.3775	17.18	27.5749	OK	23.1001	17.8162	28.3839	OK	18.6626	14.3051	23.0201	OK	19.9096	15.3061	24.5131	OK
YDL029W	YDL029W	ARP2	IV:399339-400638	85.8014	66.4752	105.128	OK	148.981	115.523	182.439	OK	93.6868	72.792	114.582	OK	134.828	104.646	165.01	OK
YDL030W	YDL030W	PRP9	IV:397536-399129	24.6029	18.7807	30.4251	OK	13.9968	10.3895	17.6041	OK	19.2119	14.5135	23.9102	OK	14.8833	11.089	18.6777	OK
YDL031W	YDL031W	DBP10	IV:394216-397204	44.6521	34.6848	54.6195	OK	6.85708	5.06864	8.64552	OK	26.0975	20.263	31.9321	OK	11.2724	8.5719	13.9728	OK
YDL032W	YDL032W	-	IV:392658-394001	0.656091	0	4.8251	OK	0.658881	0	3.22586	OK	0.352166	0	2.1564	OK	0.707289	0	2.95003	OK
YDL033C	YDL033C	SLM3	IV:392658-394001	72.81	56.5515	89.0684	OK	46.0124	35.48	56.5447	OK	53.7124	41.5429	65.8819	OK	42.6706	32.87	52.4711	OK
YDL034W	YDL034W	-	IV:389171-392127	0.268989	0	3.57817	OK	0.327379	0	3.85912	OK	0	0	0	OK	0	0	0	OK
YDL035C	YDL035C	GPR1	IV:389171-392127	77.724	59.7908	95.6572	OK	101.639	77.7637	125.515	OK	82.5578	63.6976	101.418	OK	97.6473	74.9798	120.315	OK
YDL036C	YDL036C	PUS9	IV:387512-388901	38.905	29.9883	47.8216	OK	20.2396	15.2085	25.2706	OK	26.692	20.3218	33.0622	OK	17.4505	13.0075	21.8936	OK
YDL037C	YDL037C	BSC1	IV:384600-385587	29.0378	21.7392	36.3363	OK	10.2585	7.12558	13.3914	OK	29.6451	22.2319	37.0583	OK	15.2054	10.918	19.4929	OK
YDL039C	YDL039C	PRM7	IV:381984-384081	12.5045	9.34123	15.6678	OK	4.84264	3.36922	6.31607	OK	22.885	17.5929	28.177	OK	10.0327	7.40226	12.6632	OK
YDL040C	YDL040C	NAT1	IV:378873-381438	17.4371	13.3926	21.4816	OK	15.5208	11.8785	19.163	OK	13.3198	10.1269	16.5126	OK	11.5446	8.72618	14.3629	OK
YDL041W	YDL041W	-	IV:376756-378455	0.251253	0	1.03688	OK	0	0	0	OK	0.402688	0	1.50795	OK	1.12151	0	3.2765	OK
YDL042C	YDL042C	SIR2	IV:376756-378455	9.96475	7.26452	12.665	OK	5.21638	3.59827	6.83449	OK	6.88844	4.87401	8.90287	OK	8.29413	5.94743	10.6408	OK
YDL043C	YDL043C	PRP11	IV:375679-376480	21.7643	15.7629	27.7657	OK	11.2295	7.62711	14.8319	OK	15.1623	10.7435	19.5812	OK	8.50402	5.51614	11.4919	OK
YDL044C	YDL044C	MTF2	IV:373966-375289	14.1861	10.3906	17.9817	OK	10.5256	7.53013	13.5211	OK	9.56331	6.8275	12.2991	OK	9.54775	6.7903	12.3052	OK
YDL045C	YDL045C	FAD1	IV:372687-373608	20.3619	14.8447	25.8792	OK	24.9695	18.4543	31.4846	OK	22.245	16.3168	28.1732	OK	24.0224	17.7463	30.2986	OK
YDL045W-A	YDL045W-A	MRP10	IV:372247-372535	9.49597	3.05746	15.9345	OK	12.7041	5.10679	20.3015	OK	10.8069	3.96794	17.6459	OK	15.4746	7.41916	23.53	OK
YDL046W	YDL046W	NPC2	IV:371239-371761	34.6723	24.8188	44.5258	OK	59.4955	44.2319	74.7591	OK	62.7893	46.9291	78.6494	OK	74.6336	56.2887	92.9784	OK
YDL047W	YDL047W	SIT4	IV:369770-370706	54.7998	42.1083	67.4913	OK	42.9077	32.6854	53.1299	OK	45.0745	34.384	55.765	OK	37.542	28.4382	46.6459	OK
YDL048C	YDL048C	STP4	IV:366738-368211	26.384	20.0914	32.6767	OK	16.3004	12.0428	20.5579	OK	38.6293	29.7687	47.4898	OK	18.6074	13.9381	23.2767	OK
YDL049C	YDL049C	KNH1	IV:365067-365874	5.63839	3.31981	7.95698	OK	5.5042	3.24714	7.76126	OK	5.86972	3.50998	8.22945	OK	5.33632	3.13643	7.5362	OK
YDL050C	YDL050C	-	IV:363951-364817	1.51866	0	6.05163	OK	0.584128	0	2.13992	OK	0.531334	0	2.28616	OK	1.22668	0	4.05388	OK
YDL051W	YDL051W	LHP1	IV:363951-364817	81.2971	62.7564	99.8378	OK	16.3384	11.6081	21.0687	OK	52.1068	39.7579	64.4557	OK	21.0985	15.2591	26.938	OK
YDL052C	YDL052C	SLC1	IV:362671-363583	33.8635	25.3809	42.3461	OK	32.2104	24.1318	40.289	OK	33.5566	25.229	41.8842	OK	28.1229	20.941	35.3049	OK
YDL053C	YDL053C	PBP4	IV:361698-362256	45.0279	33.0303	57.0256	OK	49.676	36.8106	62.5414	OK	44.7483	32.9628	56.5338	OK	45.3705	33.4027	57.3382	OK
YDL054C	YDL054C	MCH1	IV:359824-361285	16.0028	11.9033	20.1023	OK	19.9601	15.0051	24.9152	OK	30.4147	23.3209	37.5086	OK	31.0222	23.8121	38.2323	OK
YDL055C	YDL055C	PSA1	IV:355673-356759	1103.58	798.619	1408.54	OK	1117.07	810.22	1423.92	OK	587.265	440.039	734.491	OK	559.607	420.047	699.167	OK
YDL056W	YDL056W	MBP1	IV:352876-355378	43.0479	33.3765	52.7192	OK	37.5892	29.2181	45.9603	OK	32.681	25.3793	39.9828	OK	33.5448	26.0732	41.0164	OK
YDL057W	YDL057W	-	IV:351433-352420	11.6601	8.24662	15.0736	OK	22.815	16.8777	28.7524	OK	13.2089	9.35434	17.0635	OK	28.4229	21.3021	35.5437	OK
YDL058W	YDL058W	USO1	IV:345664-351037	48.2241	36.7407	59.7075	OK	42.3499	32.6316	52.0682	OK	39.818	30.7504	48.8856	OK	37.4313	28.9449	45.9177	OK
YDL059C	YDL059C	RAD59	IV:344236-344953	8.91086	5.63824	12.1835	OK	11.336	7.52748	15.1446	OK	12.7695	8.66945	16.8695	OK	19.664	13.9307	25.3972	OK
YDL060W	YDL060W	TSR1	IV:341618-343985	105.429	81.1673	129.69	OK	6.22011	4.50159	7.93863	OK	66.6968	51.7663	81.6273	OK	16.3521	12.4967	20.2075	OK
YDL061C	YDL061C	RPS29B	IV:340627-340798	351.207	246.282	456.133	OK	136.182	84.0082	188.356	OK	386.94	277.802	496.077	OK	158.433	101.787	215.08	OK
YDL062W	YDL062W	-	IV:338271-340282	1.64973	0	5.65933	OK	0.503599	0	1.77416	OK	1.16043	0	4.19593	OK	0.285383	0	1.01302	OK
YDL063C	YDL063C	-	IV:338271-340282	42.5899	33.0297	52.1501	OK	1.25781	0.608308	1.90731	OK	21.6205	16.5154	26.7255	OK	2.58031	1.58628	3.57435	OK
YDL064W	YDL064W	UBC9	IV:337486-338070	43.5419	31.3991	55.6847	OK	35.2039	25.0259	45.3818	OK	319.756	248.643	390.869	OK	351.326	272.907	429.745	OK
YDL065C	YDL065C	PEX19	IV:336248-337277	32.1304	24.2464	40.0144	OK	27.951	20.9608	34.9413	OK	83.5105	64.8095	102.211	OK	93.0957	72.3987	113.793	OK
YDL066W	YDL066W	IDP1	IV:334834-336121	114.804	89.1019	140.506	OK	363.098	274.765	451.43	OK	215.5	165.779	265.221	OK	363.535	275.301	451.769	OK
YDL067C	YDL067C	COX9	IV:334216-334396	125.31	77.7919	172.828	OK	185.913	124.711	247.115	OK	104.544	63.5299	145.557	OK	199.087	136.56	261.614	OK
YDL068W	YDL068W	-	IV:333120-333829	0.435728	0	1.84774	OK	1.22144	0	4.34691	OK	0.797391	0	2.28882	OK	0.636368	0	1.99687	OK
YDL069C	YDL069C	CBS1	IV:333120-333829	10.7853	7.03388	14.5367	OK	17.5716	12.289	22.8542	OK	10.8983	7.12186	14.6748	OK	19.2164	13.5687	24.8641	OK
YDL070W	YDL070W	BDF2	IV:330665-332940	264.777	198.904	330.649	OK	260.403	196.152	324.654	OK	295.886	222.249	369.523	OK	270.34	203.761	336.918	OK
YDL071C	YDL071C	-	IV:330665-332940	1.519	0	16.258	OK	1.05817	0	12.8841	OK	0.270816	0	4.51934	OK	1.56129	0	15.972	OK
YDL072C	YDL072C	YET3	IV:329835-330447	59.8337	44.9269	74.7405	OK	99.2667	76.3253	122.208	OK	131.187	101.543	160.831	OK	166.895	129.631	204.16	OK
YDL073W	YDL073W	-	IV:326612-329567	31.0581	24.1159	38.0004	OK	22.1012	17.1165	27.0859	OK	25.6004	19.8665	31.3343	OK	22.1004	17.1213	27.0794	OK
YDL074C	YDL074C	BRE1	IV:324046-326149	88.193	68.1966	108.189	OK	60.0039	46.6485	73.3593	OK	54.0603	42.0143	66.1063	OK	43.1356	33.5419	52.7294	OK
YDL075W	YDL075W	RPL31A	IV:322225-322988	934.308	724.252	1144.36	OK	355.136	275.238	435.034	OK	578.474	449.743	707.206	OK	246.146	189.6	302.691	OK
YDL076C	YDL076C	RXT3	IV:320667-321552	26.4079	19.5439	33.2719	OK	28.9733	21.564	36.3826	OK	27.3084	20.2588	34.3579	OK	31.5705	23.6276	39.5133	OK
YDL077C	YDL077C	VAM6	IV:316970-320120	17.2861	13.3196	21.2526	OK	17.2668	13.3241	21.2095	OK	15.1622	11.6596	18.6649	OK	14.4762	11.1336	17.8187	OK
YDL078C	YDL078C	MDH3	IV:315356-316388	83.4929	64.5256	102.46	OK	146.226	113.541	178.911	OK	87.5932	68.0002	107.186	OK	143.154	111.128	175.181	OK
YDL079C	YDL079C	MRK1	IV:312950-314748	3.13326	1.93053	4.33598	OK	3.35048	2.09837	4.60259	OK	6.17967	4.2927	8.06663	OK	6.98788	4.88186	9.0939	OK
YDL080C	YDL080C	THI3	IV:310641-312471	41.2912	32.0297	50.5527	OK	31.8649	24.6118	39.1181	OK	27.3066	21.0152	33.5981	OK	24.9621	19.1809	30.7433	OK
YDL081C	YDL081C	RPP1A	IV:309801-310122	815.836	627.13	1004.54	OK	371.714	287.054	456.374	OK	604.515	470.068	738.961	OK	320.968	247.504	394.433	OK
YDL082W	YDL082W	RPL13A	IV:308423-309388	492.779	378.676	606.882	OK	127.76	98.536	156.985	OK	269.332	209.421	329.243	OK	89.6019	68.7343	110.47	OK
YDL083C	YDL083C	RPS16B	IV:306925-307789	730.771	563.401	898.14	OK	175.573	135.251	215.895	OK	457.449	355.639	559.259	OK	114.409	86.9611	141.857	OK
YDL084W	YDL084W	SUB2	IV:305236-306577	358.727	270.897	446.557	OK	365.669	276.362	454.976	OK	279.522	213.136	345.909	OK	261.287	199.659	322.915	OK
YDL085C-A	YDL085C-A	-	IV:302463-302670	78.4764	48.5522	108.401	OK	72.9262	44.5306	101.322	OK	63.1233	37.5812	88.6653	OK	73.4756	45.7551	101.196	OK
YDL085W	YDL085W	NDE2	IV:303210-304848	1.12711	0.468618	1.78561	OK	5.68293	3.94166	7.42419	OK	5.44073	3.75169	7.12977	OK	11.8167	8.70561	14.9278	OK
YDL086C-A	YDL086C-A	-	IV:301412-302234	9.11576	1.70063	16.5309	OK	3.43358	0	9.53319	OK	5.66175	0	14.062	OK	2.02548	0	6.33125	OK
YDL086W	YDL086W	-	IV:301412-302234	34.4847	25.4011	43.5684	OK	73.7795	56.6542	90.9048	OK	42.9424	31.975	53.9098	OK	69.3746	53.3534	85.3958	OK
YDL087C	YDL087C	LUC7	IV:300213-300999	27.0536	19.8624	34.2448	OK	19.3248	13.7984	24.8511	OK	20.7733	14.9725	26.5741	OK	17.2491	12.2905	22.2076	OK
YDL088C	YDL088C	ASM4	IV:298416-300003	40.306	31.1589	49.4532	OK	34.5771	26.6543	42.4998	OK	30.1297	23.1247	37.1347	OK	28.7012	22.0425	35.3598	OK
YDL089W	YDL089W	NUR1	IV:296819-298274	23.0602	17.4807	28.6398	OK	22.5434	17.0695	28.0173	OK	28.5385	21.8374	35.2396	OK	25.9511	19.7843	32.118	OK
YDL090C	YDL090C	RAM1	IV:295033-296329	23.6863	17.8653	29.5073	OK	29.4036	22.391	36.4162	OK	21.9518	16.4886	27.4151	OK	29.8213	22.7424	36.9001	OK
YDL091C	YDL091C	UBX3	IV:293391-294759	15.3744	11.3569	19.3918	OK	28.4023	21.6604	35.1442	OK	17.361	12.908	21.814	OK	23.6793	17.9165	29.4421	OK
YDL092W	YDL092W	SRP14	IV:292780-293221	48.1741	34.6115	61.7367	OK	41.7331	29.4998	53.9664	OK	31.2411	21.8863	40.5959	OK	27.7615	19.1305	36.3924	OK
YDL093W	YDL093W	PMT5	IV:289571-292140	32.7015	25.3211	40.0819	OK	34.5881	26.7883	42.3879	OK	32.4466	25.1317	39.7615	OK	28.8076	22.1734	35.4419	OK
YDL094C	YDL094C	-	IV:289571-292140	2.16946	0	6.84842	OK	1.25502	0	4.92168	OK	1.04168	0	4.24462	OK	1.91089	0	6.83618	OK
YDL095W	YDL095W	PMT1	IV:286997-289512	192.186	145.096	239.276	OK	184.982	139.693	230.271	OK	150.179	114.255	186.103	OK	127.048	97.2492	156.846	OK
YDL096C	YDL096C	OPI6	IV:286997-289512	4.55281	0	31.7044	OK	3.34978	0	25.9317	OK	3.18187	0	22.4183	OK	3.53137	0	21.7939	OK
YDL097C	YDL097C	RPN6	IV:285390-286695	54.6314	42.3227	66.9401	OK	77.3407	60.119	94.5624	OK	67.7558	52.6427	82.8689	OK	74.8364	58.1891	91.4838	OK
YDL098C	YDL098C	SNU23	IV:284580-285165	7.28839	4.10047	10.4763	OK	6.00834	3.13748	8.87919	OK	6.32784	3.39262	9.26306	OK	5.30908	2.61891	7.99925	OK
YDL099W	YDL099W	BUG1	IV:283418-284444	35.3257	26.6746	43.9767	OK	45.1177	34.5781	55.6574	OK	39.1114	29.7815	48.4412	OK	48.8475	37.5493	60.1456	OK
YDL100C	YDL100C	GET3	IV:282111-283176	169.897	131.679	208.115	OK	253.478	195.302	311.655	OK	221.444	171.24	271.648	OK	263.329	202.559	324.098	OK
YDL101C	YDL101C	DUN1	IV:280306-281848	15.7473	11.7369	19.7576	OK	26.6074	20.3454	32.8694	OK	22.3763	16.9898	27.7628	OK	30.2524	23.2302	37.2747	OK
YDL102W	YDL102W	POL3	IV:276871-280165	18.7493	14.4958	23.0029	OK	14.559	11.2082	17.9097	OK	15.868	12.2382	19.4978	OK	14.4583	11.1304	17.7862	OK
YDL103C	YDL103C	QRI1	IV:275147-276581	25.2224	19.1865	31.2584	OK	49.8435	38.5659	61.121	OK	34.2691	26.3488	42.1894	OK	41.5379	32.0454	51.0304	OK
YDL104C	YDL104C	QRI7	IV:273652-274876	13.6227	9.8657	17.3797	OK	13.4923	9.79068	17.1939	OK	13.5966	9.87904	17.3142	OK	12.5737	9.07579	16.0717	OK
YDL105W	YDL105W	NSE4	IV:272388-273597	10.534	7.47154	13.5964	OK	10.3742	7.37818	13.3702	OK	9.03731	6.38048	11.6941	OK	10.087	7.14742	13.0266	OK
YDL106C	YDL106C	PHO2	IV:270221-271901	14.1026	10.4676	17.7376	OK	18.8529	14.2595	23.4463	OK	13.9418	10.3748	17.5089	OK	17.5279	13.2189	21.8369	OK
YDL107W	YDL107W	MSS2	IV:268920-269976	10.309	7.25189	13.366	OK	15.9905	11.5833	20.3977	OK	7.57972	5.09546	10.064	OK	10.7102	7.49039	13.93	OK
YDL108W	YDL108W	KIN28	IV:267697-268699	24.8665	18.3742	31.3588	OK	21.1335	15.4676	26.7993	OK	22.6081	16.632	28.5842	OK	23.4413	17.2794	29.6032	OK
YDL109C	YDL109C	-	IV:265257-267201	21.2678	16.2762	26.2593	OK	16.4351	12.4524	20.4178	OK	15.4712	11.6824	19.26	OK	13.983	10.5117	17.4544	OK
YDL110C	YDL110C	TMA17	IV:264511-264964	22.729	15.2383	30.2196	OK	101.479	76.8153	126.143	OK	60.9245	44.8755	76.9735	OK	114.84	87.5763	142.104	OK
YDL111C	YDL111C	RRP42	IV:263312-264110	39.9564	29.9726	49.9403	OK	16.308	11.5288	21.0873	OK	26.3763	19.376	33.3765	OK	17.6346	12.5377	22.7315	OK
YDL112W	YDL112W	TRM3	IV:258914-263225	71.3306	54.4582	88.2029	OK	13.3552	10.3246	16.3857	OK	44.5463	34.4616	54.631	OK	16.6282	12.8963	20.3601	OK
YDL113C	YDL113C	ATG20	IV:256632-258555	35.1153	27.1956	43.035	OK	60.9544	47.3889	74.5198	OK	47.2605	36.7484	57.7726	OK	64.7573	50.3339	79.1807	OK
YDL114W	YDL114W	-	IV:255603-256530	0.317232	0	0.852139	OK	0.220393	0	0.656684	OK	0.800625	0.051598	1.54965	OK	1.72008	0.577699	2.86247	OK
YDL114W-A	YDL114W-A	-	IV:253994-255126	0	0	0	OK	0	0	0	OK	0	0	0	OK	0	0	0	OK
YDL115C	YDL115C	IWR1	IV:253994-255126	29.4457	22.1854	36.7059	OK	47.4705	36.4815	58.4595	OK	42.1349	32.2706	51.9991	OK	57.9415	44.7538	71.1291	OK
YDL116W	YDL116W	NUP84	IV:251565-253746	61.7806	48.0395	75.5217	OK	38.2567	29.7232	46.7902	OK	41.0308	31.877	50.1846	OK	29.5609	22.8777	36.2441	OK
YDL117W	YDL117W	CYK3	IV:248580-251238	57.7487	44.7811	70.7164	OK	56.1144	43.5939	68.6349	OK	54.8651	42.6297	67.1004	OK	73.072	56.556	89.588	OK
YDL118W	YDL118W	-	IV:246688-247682	0.335393	0	1.87245	OK	0.362506	0	1.58374	OK	0	0	0	OK	0	0	0	OK
YDL119C	YDL119C	-	IV:246688-247682	15.0029	10.6956	19.3103	OK	26.0554	19.3122	32.7985	OK	18.7628	13.6167	23.9088	OK	32.227	24.1843	40.2697	OK
YDL120W	YDL120W	YFH1	IV:245922-246447	10.2288	6.08689	14.3707	OK	11.3843	6.95819	15.8104	OK	14.5392	9.33488	19.7435	OK	14.6886	9.50109	19.8761	OK
YDL121C	YDL121C	-	IV:245132-245582	131.969	100.144	163.795	OK	36.2953	25.6543	46.9363	OK	119.343	91.1002	147.586	OK	49.5438	35.9726	63.115	OK
YDL122W	YDL122W	UBP1	IV:242551-244981	90.0965	69.5097	110.683	OK	36.3798	28.2797	44.4799	OK	67.7599	52.5694	82.9504	OK	39.8267	30.9698	48.6837	OK
YDL123W	YDL123W	SNA4	IV:241417-241840	11.8079	6.63291	16.9828	OK	8.58888	4.23068	12.9471	OK	17.9524	11.2618	24.643	OK	15.1023	9.17863	21.0259	OK
YDL124W	YDL124W	-	IV:240258-241197	54.9043	42.2073	67.6013	OK	138.251	107.425	169.077	OK	127.257	98.8753	155.638	OK	171.158	132.982	209.335	OK
YDL125C	YDL125C	HNT1	IV:239018-239606	130.847	99.8807	161.813	OK	145.112	111.734	178.491	OK	151.033	116.444	185.623	OK	131.951	101.41	162.492	OK
YDL126C	YDL126C	CDC48	IV:236156-238664	182.207	137.723	226.691	OK	345.403	253.76	437.046	OK	341.999	251.367	432.632	OK	398.667	290.8	506.534	OK
YDL127W	YDL127W	PCL2	IV:234926-235853	5.76635	3.54366	7.98903	OK	7.23588	4.69188	9.77987	OK	5.56112	3.4206	7.70165	OK	5.50251	3.36159	7.64343	OK
YDL128W	YDL128W	VCX1	IV:232651-233887	109.433	84.64	134.226	OK	124.855	96.9912	152.718	OK	107.935	83.9063	131.963	OK	110.479	85.8417	135.116	OK
YDL129W	YDL129W	-	IV:231023-231899	32.8086	24.5403	41.077	OK	14.1752	10.0835	18.2669	OK	28.8249	21.436	36.2138	OK	16.317	11.6585	20.9755	OK
YDL130W	YDL130W	RPP1B	IV:229905-230527	181.187	137.124	225.251	OK	73.1951	52.3523	94.0378	OK	140.848	105.278	176.419	OK	55.7299	38.727	72.7327	OK
YDL130W-A	YDL130W-A	STF1	IV:229170-229431	2.64451	0	6.65132	OK	42.6035	26.4179	58.7891	OK	27.0516	14.9132	39.19	OK	66.5178	45.3472	87.6884	OK
YDL131W	YDL131W	LYS21	IV:227392-228715	31.8082	24.3211	39.2953	OK	40.339	31.0838	49.5942	OK	32.4462	24.8051	40.0873	OK	36.3279	27.9215	44.7344	OK
YDL132W	YDL132W	CDC53	IV:224303-226751	44.4747	34.5104	54.4389	OK	53.2558	41.3938	65.1177	OK	65.3318	50.7136	79.9501	OK	71.3142	55.3031	87.3253	OK
YDL133C-A	YDL133C-A	RPL41B	IV:221723-221801	0	0	0	OK	0	0	0	OK	0	0	0	OK	0	0	0	OK
YDL133W	YDL133W	SRF1	IV:222426-223740	34.2886	26.295	42.2823	OK	29.6474	22.6124	36.6823	OK	33.9441	26.0289	41.8593	OK	32.0015	24.4909	39.5121	OK
YDL134C	YDL134C	PPH21	IV:219661-220771	65.8246	50.9226	80.7267	OK	59.6767	46.1416	73.2118	OK	71.7054	55.6041	87.8067	OK	64.4968	49.8829	79.1106	OK
YDL135C	YDL135C	RDI1	IV:218679-219288	38.0703	27.9257	48.2149	OK	79.3077	60.5266	98.0889	OK	43.6782	32.2913	55.065	OK	63.8191	48.3236	79.3146	OK
YDL136W	YDL136W	RPL35B	IV:217599-218367	542.42	419.614	665.226	OK	162.283	123.371	201.194	OK	295.842	229.073	362.612	OK	121.42	91.1416	151.699	OK
YDL137W	YDL137W	ARF2	IV:216528-217074	148.666	114.762	182.569	OK	321.492	249.716	393.268	OK	200.377	155.671	245.084	OK	280.924	218.442	343.405	OK
YDL138W	YDL138W	RGT2	IV:213350-215642	26.991	20.8775	33.1046	OK	47.8703	37.2312	58.5094	OK	23.5557	18.1741	28.9374	OK	43.0925	33.512	52.6731	OK
YDL139C	YDL139C	SCM3	IV:211374-212046	7.87592	4.75852	10.9933	OK	5.88653	3.26411	8.50895	OK	8.27909	5.10958	11.4486	OK	5.80624	3.22435	8.38813	OK
YDL140C	YDL140C	RPO21	IV:205359-210561	162.517	118.75	206.285	OK	130.444	96.6465	164.241	OK	170.348	124.761	215.935	OK	139.138	102.976	175.3	OK
YDL141W	YDL141W	BPL1	IV:203038-205111	7.18824	5.2003	9.17618	OK	8.91217	6.5481	11.2762	OK	6.79937	4.893	8.70573	OK	8.35871	6.11586	10.6016	OK
YDL142C	YDL142C	CRD1	IV:201718-202570	14.0986	9.90295	18.2942	OK	21.527	15.6202	27.4338	OK	14.873	10.5031	19.243	OK	22.706	16.5987	28.8133	OK
YDL143W	YDL143W	CCT4	IV:199995-201582	120.638	93.5482	147.728	OK	93.3918	72.6135	114.17	OK	118.606	91.976	145.236	OK	94.2951	73.2519	115.338	OK
YDL144C	YDL144C	-	IV:198661-199732	19.6459	14.4386	24.8532	OK	34.9315	26.5553	43.3077	OK	22.2304	16.4884	27.9723	OK	30.4845	23.0427	37.9263	OK
YDL145C	YDL145C	COP1	IV:194570-198176	198.828	147.261	250.394	OK	202.832	150.13	255.533	OK	170.02	126.999	213.041	OK	146.861	110.382	183.34	OK
YDL146W	YDL146W	LDB17	IV:192749-194225	28.9063	22.1274	35.6852	OK	24.7524	18.8395	30.6652	OK	26.0379	19.8418	32.234	OK	21.328	16.1248	26.5312	OK
YDL147W	YDL147W	RPN5	IV:190923-192261	135.981	105.452	166.51	OK	209.923	161.454	258.393	OK	190.246	146.664	233.828	OK	228.438	175.326	281.551	OK
YDL148C	YDL148C	NOP14	IV:188153-190586	86.2973	66.5041	106.09	OK	2.65976	1.75593	3.56359	OK	51.0844	39.6642	62.5045	OK	12.5074	9.4636	15.5512	OK
YDL149W	YDL149W	ATG9	IV:184924-187918	13.5158	10.3476	16.684	OK	38.5024	29.9323	47.0726	OK	20.8756	16.1571	25.5941	OK	38.9871	30.3101	47.664	OK
YDL150W	YDL150W	RPC53	IV:183317-184611	40.9275	31.4709	50.3841	OK	5.24191	3.43489	7.04894	OK	24.504	18.4763	30.5317	OK	6.20085	4.18389	8.21781	OK
YDL151C	YDL151C	BUD30	IV:183317-184611	0.993019	0	3.45418	OK	0.133238	0	0.630713	OK	0.772398	0	2.606	OK	0.180957	0	0.841167	OK
YDL152W	YDL152W	-	IV:181185-183187	6.25211	0	21.7255	OK	0.307076	0	1.32472	OK	2.39812	0	9.42739	OK	0.895199	0	3.39859	OK
YDL153C	YDL153C	SAS10	IV:181185-183187	89.6895	69.3946	109.984	OK	4.26855	2.8946	5.6425	OK	50.5334	39.2545	61.8122	OK	11.9706	8.86392	15.0773	OK
YDL154W	YDL154W	MSH5	IV:178333-181039	10.7899	8.14882	13.4309	OK	6.23535	4.5594	7.9113	OK	7.58053	5.61185	9.54921	OK	6.4412	4.71537	8.16704	OK
YDL155W	YDL155W	CLB3	IV:176772-178056	57.6905	44.7056	70.6754	OK	42.1872	32.5018	51.8726	OK	37.2475	28.5963	45.8988	OK	29.3034	22.3216	36.2853	OK
YDL156W	YDL156W	-	IV:174917-176486	35.3277	27.1721	43.4832	OK	30.1082	23.1408	37.0756	OK	22.1101	16.7952	27.425	OK	20.9276	15.8631	25.9921	OK
YDL157C	YDL157C	-	IV:174231-174588	67.3901	48.2989	86.4812	OK	49.8491	34.9843	64.7139	OK	68.0494	49.0234	87.0754	OK	76.8132	55.8707	97.7557	OK
YDL158C	YDL158C	-	IV:172480-174174	19.2439	4.92949	33.5584	OK	9.46332	0	20.5666	OK	14.0014	2.72245	25.2804	OK	6.59031	0	14.5076	OK
YDL159C-B	YDL159C-B	-	IV:172480-174174	0	0	0	OK	0.645544	0	2.45224	OK	0	0	0	OK	0	0	0	OK
YDL159W	YDL159W	STE7	IV:172480-174174	13.1397	9.49438	16.7851	OK	17.4831	13.0304	21.9359	OK	12.7546	9.25867	16.2505	OK	15.3455	11.3741	19.3169	OK
YDL159W-A	YDL159W-A	-	IV:172181-172313	0	0	0	OK	0	0	0	OK	0	0	0	OK	0	0	0	OK
YDL160C	YDL160C	DHH1	IV:170409-171930	65.0119	50.3468	79.677	OK	72.4693	56.2927	88.6459	OK	60.5448	47.0092	74.0805	OK	65.3483	50.7234	79.9731	OK
YDL160C-A	YDL160C-A	-	IV:169365-169608	27.4661	13.7354	41.1968	OK	23.1671	10.7556	35.5787	OK	17.0726	6.78831	27.3568	OK	24.0576	11.8501	36.2652	OK
YDL161W	YDL161W	ENT1	IV:167358-169078	24.5151	18.4785	30.5516	OK	26.0747	19.7959	32.3535	OK	24.2533	18.3536	30.1531	OK	25.174	19.0556	31.2924	OK
YDL162C	YDL162C	-	IV:167358-169078	0.631665	0	3.07104	OK	0.939238	0	3.25401	OK	0	0	0	OK	0.764306	0	2.67726	OK
YDL163W	YDL163W	-	IV:164986-167258	0.335728	0	2.75029	OK	0.210528	0	1.8474	OK	0	0	0	OK	0	0	0	OK
YDL164C	YDL164C	CDC9	IV:164986-167258	43.1908	33.576	52.8055	OK	36.2407	28.1462	44.3351	OK	34.433	26.7195	42.1465	OK	29.9117	23.1841	36.6394	OK
YDL165W	YDL165W	CDC36	IV:164289-164865	54.1181	40.2383	67.9978	OK	53.4841	39.7858	67.1825	OK	41.9898	30.8811	53.0985	OK	43.3591	32.0154	54.7029	OK
YDL166C	YDL166C	FAP7	IV:163448-164042	37.6718	27.5371	47.8065	OK	18.1706	12.5042	23.8371	OK	23.9034	16.9578	30.849	OK	16.1255	10.9389	21.3121	OK
YDL167C	YDL167C	NRP1	IV:160994-163154	91.5058	70.8548	112.157	OK	5.75048	4.08374	7.41722	OK	55.7367	43.3366	68.1367	OK	13.4397	10.1401	16.7393	OK
YDL168W	YDL168W	SFA1	IV:159603-160764	54.0806	41.7488	66.4125	OK	39.4723	30.2635	48.6811	OK	62.9645	48.8	77.129	OK	49.2888	37.9682	60.6093	OK
YDL169C	YDL169C	UGX2	IV:158063-158735	1.01088	0	2.04913	OK	15.0871	10.3142	19.86	OK	5.82775	3.23987	8.41564	OK	16.3561	11.3772	21.335	OK
YDL170W	YDL170W	UGA3	IV:156317-157904	14.2803	10.6107	17.9499	OK	29.9021	22.9773	36.8269	OK	19.6426	14.8505	24.4347	OK	28.1176	21.5591	34.6761	OK
YDL171C	YDL171C	GLT1	IV:149202-155640	187.467	134.514	240.42	OK	376.394	259.108	493.681	OK	191.814	137.812	245.816	OK	455.895	310.945	600.844	OK
YDL172C	YDL172C	-	IV:148190-149086	3.96298	0	9.30065	OK	3.06554	0	9.07565	OK	4.84911	0	11.8504	OK	4.5729	0	14.5747	OK
YDL173W	YDL173W	PAR32	IV:148190-149086	55.1144	42.1269	68.1018	OK	100.823	78.1003	123.545	OK	85.4171	65.9665	104.868	OK	140.217	108.815	171.618	OK
YDL174C	YDL174C	DLD1	IV:145825-147589	41.8571	32.4518	51.2624	OK	71.3179	55.4451	87.1906	OK	42.8506	33.2343	52.4669	OK	54.0394	42.0147	66.0641	OK
YDL175C	YDL175C	AIR2	IV:144483-145518	13.8185	9.87268	17.7644	OK	10.3013	7.22033	13.3823	OK	14.6533	10.5342	18.7725	OK	14.3728	10.3133	18.4323	OK
YDL176W	YDL176W	-	IV:142096-144223	12.6811	9.52723	15.835	OK	12.2375	9.17502	15.3	OK	11.0485	8.23989	13.857	OK	13.4558	10.1437	16.7679	OK
YDL177C	YDL177C	-	IV:141208-141721	10.9527	6.49282	15.4126	OK	21.6007	14.8167	28.3847	OK	12.9907	8.08792	17.8935	OK	21.1564	14.4905	27.8223	OK
YDL178W	YDL178W	DLD2	IV:139521-141114	49.254	38.1855	60.3225	OK	44.3885	34.3827	54.3944	OK	43.6021	33.782	53.4223	OK	41.4103	32.0298	50.7908	OK
YDL179W	YDL179W	PCL9	IV:138290-139205	8.13276	5.37941	10.8861	OK	6.92714	4.43331	9.42097	OK	6.36157	4.01076	8.71238	OK	9.09765	6.12283	12.0725	OK
YDL180W	YDL180W	-	IV:135895-137539	13.8659	10.3092	17.4226	OK	22.6768	17.281	28.0725	OK	14.7173	10.9824	18.4521	OK	19.7758	14.9719	24.5798	OK
YDL181W	YDL181W	INH1	IV:135178-135436	8.94285	1.81306	16.0726	OK	35.485	20.8159	50.1541	OK	29.5614	16.4907	42.6322	OK	42.8852	26.7439	59.0265	OK
YDL182W	YDL182W	LYS20	IV:133436-134723	10.431	7.42701	13.4351	OK	13.8152	10.0844	17.546	OK	19.6826	14.6837	24.6815	OK	22.373	16.7938	27.9522	OK
YDL183C	YDL183C	-	IV:130870-131833	3.83312	2.15296	5.51327	OK	4.42861	2.61263	6.2446	OK	4.09951	2.36355	5.83547	OK	6.12703	3.88392	8.37013	OK
YDL184C	YDL184C	RPL41A	IV:130406-130484	0	0	0	OK	0	0	0	OK	0	0	0	OK	0	0	0	OK
YDL185C-A	YDL185C-A	-	IV:126607-130002	0	0	0	OK	0.404829	0	14.3265	OK	0	0	0	OK	0	0	0	OK
YDL185W	YDL185W	VMA1	IV:126607-130002	490.239	348.066	632.413	OK	693.972	482.09	905.854	OK	448.219	319.396	577.042	OK	542.126	382.295	701.957	OK
YDL186W	YDL186W	-	IV:125508-126449	0.652831	0	1.43947	OK	0.249293	0	0.708203	OK	0.333704	0	0.978486	OK	0.327907	0	0.867045	OK
YDL187C	YDL187C	-	IV:125508-126449	2.73327	0	5.89064	OK	1.15719	0	3.58824	OK	4.31708	0.179708	8.45445	OK	3.86521	0	7.903	OK
YDL188C	YDL188C	PPH22	IV:123864-124998	42.1148	32.3023	51.9273	OK	44.3239	34.0676	54.5802	OK	52.2986	40.3509	64.2463	OK	54.383	41.9998	66.7662	OK
YDL189W	YDL189W	RBS1	IV:122215-123589	26.3754	20.0547	32.696	OK	26.5229	20.1676	32.8781	OK	22.5392	17.015	28.0634	OK	23.7329	17.9693	29.4965	OK
YDL190C	YDL190C	UFD2	IV:118706-121592	71.6208	55.3217	87.9199	OK	81.2927	62.6737	99.9117	OK	70.9762	54.8647	87.0877	OK	75.6271	58.3854	92.8689	OK
YDL191W	YDL191W	RPL35A	IV:117663-118517	882.47	680.754	1084.19	OK	388.125	301.612	474.637	OK	484.267	376.653	591.881	OK	262.11	202.389	321.832	OK
YDL192W	YDL192W	ARF1	IV:116320-116866	449.48	345.133	553.827	OK	389.134	301.327	476.942	OK	338.952	263.514	414.389	OK	316.486	246.078	386.894	OK
YDL193W	YDL193W	NUS1	IV:114671-115799	21.5614	16.022	27.1009	OK	31.4904	23.887	39.0938	OK	28.3351	21.3846	35.2857	OK	29.02	21.9359	36.1042	OK
YDL194W	YDL194W	SNF3	IV:111579-114234	15.1726	11.6154	18.7297	OK	14.1343	10.7942	17.4744	OK	18.9123	14.5678	23.2568	OK	19.8471	15.3013	24.3929	OK
YDL195W	YDL195W	SEC31	IV:107207-111029	39.0872	30.3202	47.8542	OK	33.0445	25.6334	40.4556	OK	39.6684	30.7818	48.5551	OK	34.7651	27.0048	42.5255	OK
YDL196W	YDL196W	-	IV:106740-107070	1.46844	0	3.91413	OK	0.865547	0	2.85049	OK	1.67463	0	3.47241	OK	2.59247	0	5.60205	OK
YDL197C	YDL197C	ASF2	IV:104916-106494	40.7323	31.4489	50.0156	OK	40.9092	31.6527	50.1656	OK	39.8673	30.8104	48.9243	OK	44.6965	34.5814	54.8116	OK
YDL198C	YDL198C	GGC1	IV:103648-104551	24.6871	18.1988	31.1753	OK	62.8765	48.4262	77.3268	OK	33.7988	25.412	42.1855	OK	49.9459	38.235	61.6569	OK
YDL199C	YDL199C	-	IV:101289-103353	5.85095	4.17005	7.53186	OK	14.8151	11.1924	18.4377	OK	9.85634	7.2801	12.4326	OK	19.1489	14.6437	23.654	OK
YDL200C	YDL200C	MGT1	IV:100500-101067	16.2182	10.8182	21.6182	OK	41.3316	30.3336	52.3296	OK	27.2298	19.3796	35.08	OK	41.0188	30.1278	51.9099	OK
YDL201W	YDL201W	TRM8	IV:99560-100421	6.19055	3.8236	8.55751	OK	1.51174	0.391554	2.63192	OK	5.90818	3.63952	8.17684	OK	1.99057	0.741125	3.24002	OK
YDL202W	YDL202W	MRPL11	IV:98474-99224	27.9278	20.4328	35.4228	OK	28.3996	20.8397	35.9595	OK	28.5764	20.967	36.1858	OK	25.4274	18.4808	32.374	OK
YDL203C	YDL203C	ACK1	IV:96081-97953	29.4695	22.7394	36.1996	OK	23.1681	17.7697	28.5665	OK	22.3573	17.1238	27.5907	OK	22.6723	17.38	27.9646	OK
YDL204W	YDL204W	RTN2	IV:94604-95786	12.9286	9.31476	16.5425	OK	53.6318	41.4518	65.8118	OK	98.1274	76.3269	119.928	OK	214.157	165.3	263.014	OK
YDL205C	YDL205C	HEM3	IV:92761-93745	99.1533	76.9959	121.311	OK	43.3497	33.1084	53.5911	OK	83.6793	64.8941	102.464	OK	54.128	41.6651	66.5909	OK
YDL206W	YDL206W	-	IV:90175-92464	21.3737	16.4595	26.2879	OK	34.8068	27.0251	42.5885	OK	30.6553	23.769	37.5415	OK	40.011	31.1156	48.9064	OK
YDL207W	YDL207W	GLE1	IV:88247-89864	24.9928	19.093	30.8926	OK	25.8134	19.7589	31.8679	OK	20.2782	15.3709	25.1856	OK	20.9411	15.897	25.9853	OK
YDL208W	YDL208W	NHP2	IV:87511-87982	231.075	178.792	283.357	OK	29.999	21.0841	38.9139	OK	111.92	85.4798	138.361	OK	37.191	26.4565	47.9255	OK
YDL209C	YDL209C	CWC2	IV:86206-87226	16.8584	12.229	21.4878	OK	8.19786	5.56055	10.8352	OK	10.7824	7.57826	13.9865	OK	7.44585	4.97896	9.91274	OK
YDL210W	YDL210W	UGA4	IV:84269-85985	1.0593	0.433932	1.68467	OK	99.0303	76.7917	121.269	OK	2.54938	1.54804	3.55072	OK	61.5694	47.8563	75.2825	OK
YDL211C	YDL211C	-	IV:79293-80412	4.62439	2.87016	6.37862	OK	3.44901	1.99108	4.90693	OK	3.38623	1.91587	4.85659	OK	2.51377	1.2918	3.73575	OK
YDL212W	YDL212W	SHR3	IV:78425-79058	195.933	149.543	242.323	OK	138.998	107.484	170.512	OK	178.49	138.677	218.302	OK	164.634	127.957	201.311	OK
YDL213C	YDL213C	NOP6	IV:77288-77966	32.6093	23.9147	41.3038	OK	8.84096	5.52954	12.1524	OK	25.4041	18.2925	32.5157	OK	13.6915	9.29411	18.0889	OK
YDL214C	YDL214C	PRR2	IV:74445-76545	3.29004	2.18921	4.39087	OK	2.28441	1.41661	3.15221	OK	1.32737	0.698157	1.95659	OK	1.62715	0.9215	2.3328	OK
YDL215C	YDL215C	GDH2	IV:70639-73918	38.7557	30.1341	47.3773	OK	230.607	170.437	290.776	OK	45.3856	35.2484	55.5227	OK	253.195	186.272	320.118	OK
YDL216C	YDL216C	RRI1	IV:68996-70319	15.6204	11.5165	19.7243	OK	16.8251	12.4705	21.1796	OK	12.4723	9.05321	15.8913	OK	15.36	11.3321	19.3878	OK
YDL217C	YDL217C	TIM22	IV:67982-68606	24.4952	17.4427	31.5477	OK	19.9625	13.9258	25.9992	OK	19.3962	13.5117	25.2807	OK	19.5895	13.747	25.4319	OK
YDL218W	YDL218W	-	IV:66492-67446	1.4499	0.416716	2.48308	OK	1.41348	0.425283	2.40167	OK	2.00792	0.826251	3.18959	OK	1.95148	0.771579	3.13138	OK
YDL219W	YDL219W	DTD1	IV:65241-65765	49.4059	35.7055	63.1063	OK	46.4928	33.5821	59.4035	OK	35.3441	24.9264	45.7618	OK	40.5667	28.933	52.2004	OK
YDL220C	YDL220C	CDC13	IV:62010-65018	20.4473	15.6931	25.2015	OK	16.0881	12.2767	19.8996	OK	16.1198	12.2705	19.969	OK	13.276	10.0337	16.5183	OK
YDL221W	YDL221W	-	IV:62010-65018	2.5512	0	7.33305	OK	5.40358	0	12.6352	OK	6.37071	0	13.5287	OK	6.70339	0.288497	13.1183	OK
YDL222C	YDL222C	FMP45	IV:60871-61801	4.7418	2.79073	6.69287	OK	6.86356	4.4052	9.32193	OK	23.8287	17.5492	30.1082	OK	47.8204	36.4857	59.1552	OK
YDL223C	YDL223C	HBT1	IV:57264-60405	5.36342	3.89328	6.83356	OK	8.49588	6.36689	10.6249	OK	18.6662	14.3996	22.9327	OK	28.0047	21.7544	34.255	OK
YDL224C	YDL224C	WHI4	IV:54396-56346	22.2701	17.055	27.4852	OK	21.6609	16.6019	26.7199	OK	18.2786	13.9025	22.6546	OK	16.4044	12.4332	20.3756	OK
YDL225W	YDL225W	SHS1	IV:52444-54100	37.6042	29.036	46.1724	OK	45.4958	35.282	55.7095	OK	33.9777	26.217	41.7384	OK	36.4493	28.1715	44.7272	OK
YDL226C	YDL226C	GCS1	IV:51114-52173	39.6793	30.3032	49.0554	OK	59.9257	46.2666	73.5849	OK	34.0555	25.8353	42.2757	OK	42.941	32.9103	52.9717	OK
YDL227C	YDL227C	HO	IV:46270-48031	32.778	25.3116	40.2445	OK	32.0567	24.7304	39.3829	OK	13.8341	10.3287	17.3396	OK	13.4298	10.0076	16.852	OK
YDL228C	YDL228C	-	IV:44064-45918	2.18863	0	35.484	OK	0.463227	0	7.95191	OK	0.813606	0	11.8333	OK	0.387454	0	4.88178	OK
YDL229W	YDL229W	SSB1	IV:44064-45918	1491.85	1026.36	1957.33	OK	484.491	355.986	612.995	OK	658.002	474.955	841.049	OK	254.815	192.366	317.264	OK
YDL230W	YDL230W	PTP1	IV:42699-43707	18.9808	13.8642	24.0975	OK	29.9002	22.4381	37.3623	OK	27.9078	20.909	34.9065	OK	35.0517	26.5771	43.5262	OK
YDL231C	YDL231C	BRE4	IV:38866-42244	82.1009	63.0086	101.193	OK	125.477	94.9808	155.974	OK	63.6229	49.1668	78.0791	OK	87.3142	66.941	107.687	OK
YDL232W	YDL232W	OST4	IV:38486-38597	62.1538	0	235.225	OK	0	0	0	OK	21.8813	18.7394	25.0233	OK	73.976	0	205.069	OK
YDL233W	YDL233W	-	IV:36796-38173	12.463	9.08758	15.8384	OK	15.6061	11.5462	19.6659	OK	15.7592	11.6715	19.8469	OK	21.618	16.2184	27.0177	OK
YDL234C	YDL234C	GYP7	IV:34236-36477	34.1657	26.4942	41.8372	OK	75.678	58.6146	92.7414	OK	87.8226	67.9985	107.647	OK	150.597	115.004	186.191	OK
YDL235C	YDL235C	YPD1	IV:33414-33918	42.0363	30.4139	53.6587	OK	37.3289	26.86	47.7979	OK	41.1907	29.8219	52.5596	OK	39.2004	28.3456	50.0552	OK
YDL236W	YDL236W	PHO13	IV:32295-33234	93.4251	72.0623	114.788	OK	149.263	115.944	182.583	OK	79.8483	61.8557	97.8409	OK	98.521	76.544	120.498	OK
YDL237W	YDL237W	AIM6	IV:30656-31829	67.6932	52.3975	82.989	OK	115.167	89.512	140.822	OK	70.0845	54.3831	85.7859	OK	83.2415	64.7274	101.756	OK
YDL238C	YDL238C	GUD1	IV:28984-30454	31.3608	24.0758	38.6459	OK	144.132	111.522	176.742	OK	34.7322	26.7265	42.7379	OK	110.92	86.1237	135.716	OK
YDL239C	YDL239C	ADY3	IV:26402-28775	15.5211	11.8154	19.2268	OK	55.5318	43.1163	67.9473	OK	17.7243	13.5905	21.858	OK	39.2499	30.5216	47.9781	OK
YDL240C-A	YDL240C-A	-	IV:22470-22608	0	0	0	OK	0	0	0	OK	0	0	0	OK	0	0	0	OK
YDL240W	YDL240W	LRG1	IV:22822-25876	37.927	29.4496	46.4044	OK	37.1472	28.8839	45.4105	OK	24.6861	19.156	30.2163	OK	25.7891	20.0261	31.5521	OK
YDL241W	YDL241W	-	IV:20634-21006	20.0704	12.3013	27.8395	OK	5.20012	1.45827	8.94198	OK	16.0824	9.42429	22.7405	OK	9.41852	4.42876	14.4083	OK
YDL242W	YDL242W	-	IV:18958-19312	0.122966	0	0.908614	OK	0.689958	0	2.43273	OK	0.279671	0	1.05749	OK	1.68227	0	3.38655	OK
YDL243C	YDL243C	AAD4	IV:17576-18566	10.5331	7.3441	13.7221	OK	10.2372	7.11572	13.3588	OK	13.1035	9.31322	16.8937	OK	17.6522	12.846	22.4584	OK
YDL244W	YDL244W	THI13	IV:16203-17226	0.337345	0	0.812367	OK	0.463322	0	1.01132	OK	1.37376	0.432031	2.31549	OK	1.65764	0.606205	2.70907	OK
YDL245C	YDL245C	HXT15	IV:11656-13360	0.0484579	0	0.196028	OK	0.053747	0	0.201198	OK	0.112411	0	0.320343	OK	0.121506	0	0.336454	OK
YDL246C	YDL246C	SOR2	IV:8682-9756	0.317879	0	0.766234	OK	0.177966	0	0.543724	OK	1.20118	0.349743	2.05262	OK	1.15554	0.305213	2.00588	OK
YDL247W	YDL247W	MPH2	IV:5984-7814	0.253182	0	0.569107	OK	0.0653049	0	0.265017	OK	0.152996	0	0.389252	OK	0.112356	0	0.311118	OK
YDL247W-A	YDL247W-A	-	IV:3761-3836	0	0	0	OK	0	0	0	OK	0	0	0	OK	0	0	0	OK
YDL248W	YDL248W	COS7	IV:1801-2953	22.9583	17.1141	28.8025	OK	27.539	20.7808	34.2973	OK	33.3207	25.3646	41.2768	OK	36.6676	28.0405	45.2946	OK
YDR001C	YDR001C	NTH1	IV:450219-452475	96.0421	74.1651	117.919	OK	237.45	178.792	296.107	OK	162.953	124.169	201.737	OK	262.067	196.334	327.8	OK
YDR002W	YDR002W	YRB1	IV:453044-453650	416.926	321.94	511.913	OK	406.895	314.558	499.232	OK	416.889	322.218	511.56	OK	453.655	350.093	557.217	OK
YDR003W	YDR003W	RCR2	IV:454121-454754	28.88	20.8627	36.8972	OK	50.2786	37.614	62.9433	OK	37.8162	27.7926	47.8399	OK	53.3889	40.1667	66.6112	OK
YDR003W-A	YDR003W-A	-	IV:454781-454904	23.9408	16.4714	31.4102	OK	58.3387	0	139.81	OK	17.2498	9.93017	24.5695	OK	80.2599	0	167.437	OK
YDR004W	YDR004W	RAD57	IV:455200-456583	32.7556	25.1166	40.3945	OK	30.9143	23.6557	38.1729	OK	29.308	22.3839	36.2321	OK	28.4938	21.7488	35.2389	OK
YDR005C	YDR005C	MAF1	IV:456835-458103	41.0043	31.5073	50.5013	OK	47.6238	36.7299	58.5177	OK	34.6025	26.4375	42.7674	OK	39.5892	30.388	48.7903	OK
YDR006C	YDR006C	SOK1	IV:458541-461247	19.7394	15.1772	24.3016	OK	15.4329	11.8073	19.0585	OK	19.4471	14.9998	23.8945	OK	17.1576	13.1877	21.1276	OK
YDR007W	YDR007W	TRP1	IV:461841-462602	28.4583	20.5843	36.3323	OK	38.4575	28.4664	48.4487	OK	24.5498	17.4384	31.6612	OK	42.9099	31.9909	53.8288	OK
YDR008C	YDR008C	-	IV:461841-462602	1.43054	0	5.111	OK	0.468394	0	2.14654	OK	2.81056	0	8.38488	OK	1.53216	0	5.50252	OK
YDR009W	YDR009W	GAL3	IV:463433-464996	5.64695	3.89006	7.40385	OK	8.19115	5.81369	10.5686	OK	10.9002	7.94852	13.8518	OK	10.448	7.59202	13.3039	OK
YDR010C	YDR010C	-	IV:465050-465383	0.560219	0	1.60997	OK	1.27311	0	3.66286	OK	0.333788	0	1.17059	OK	1.05853	0	2.93059	OK
YDR011W	YDR011W	SNQ2	IV:465918-470424	159.164	117.582	200.746	OK	152.407	113.092	191.722	OK	175.968	129.699	222.237	OK	144.206	107.373	181.039	OK
YDR012W	YDR012W	RPL4B	IV:471852-472941	99.2871	77.1777	121.397	OK	43.0681	32.993	53.1431	OK	64.1177	49.6255	78.6099	OK	34.5532	26.2939	42.8126	OK
YDR013W	YDR013W	PSF1	IV:473156-473783	23.7596	16.817	30.7022	OK	17.6317	12.2002	23.0631	OK	17.4336	12.0805	22.7867	OK	13.7407	9.18467	18.2968	OK
YDR014W	YDR014W	RAD61	IV:474045-475989	18.1178	13.7764	22.4593	OK	17.4404	13.24	21.6408	OK	16.6805	12.635	20.726	OK	18.4781	14.0745	22.8816	OK
YDR014W-A	YDR014W-A	HED1	IV:477796-478285	0.0721563	0	0.614112	OK	1.00778	0	2.45748	OK	0.679681	0	1.73896	OK	1.56848	0	3.30178	OK
YDR015C	YDR015C	-	IV:477796-478285	0	0	0	OK	0.778323	0	2.03267	OK	0	0	0	OK	0.855829	0	3.3247	OK
YDR016C	YDR016C	DAD1	IV:478473-478758	24.1924	13.4072	34.9777	OK	37.313	23.4677	51.1583	OK	25.4155	14.6128	36.2183	OK	31.883	19.6091	44.1569	OK
YDR017C	YDR017C	KCS1	IV:479114-482267	29.9707	23.2705	36.671	OK	22.5653	17.4822	27.6484	OK	17.9562	13.8747	22.0376	OK	17.8935	13.8265	21.9605	OK
YDR018C	YDR018C	-	IV:482669-483860	1.78513	0.785532	2.78473	OK	6.03166	4.0079	8.05542	OK	6.54159	4.39401	8.68918	OK	10.6676	7.59819	13.737	OK
YDR019C	YDR019C	GCV1	IV:484162-485365	39.3292	30.1497	48.5087	OK	61.0616	47.2956	74.8277	OK	24.5268	18.4469	30.6068	OK	51.6454	39.9054	63.3853	OK
YDR020C	YDR020C	DAS2	IV:485745-486444	13.5772	9.2357	17.9188	OK	2.6983	0.993581	4.40301	OK	8.10721	5.02592	11.1885	OK	2.80623	1.07146	4.54099	OK
YDR021W	YDR021W	FAL1	IV:486803-488003	16.2717	11.9345	20.6088	OK	1.96939	0.928447	3.01034	OK	10.6771	7.55162	13.8027	OK	3.73616	2.24348	5.22884	OK
YDR022C	YDR022C	CIS1	IV:488071-488662	6.94298	3.84621	10.0398	OK	15.7981	10.6527	20.9436	OK	8.05089	4.70341	11.3984	OK	10.2742	6.40168	14.1466	OK
YDR023W	YDR023W	SES1	IV:489507-490896	361.842	273.233	450.451	OK	252.079	192.611	311.547	OK	251.72	192.323	311.117	OK	196.081	150.87	241.292	OK
YDR024W	YDR024W	FYV1	IV:491016-491502	0.900617	0	2.17103	OK	0.257424	0	0.88122	OK	0.769098	0	2.01032	OK	0.908181	0	2.14496	OK
YDR025W	YDR025W	RPS11A	IV:491514-492324	392.921	305.508	480.334	OK	134.624	103.213	166.036	OK	327.828	254.681	400.974	OK	113.774	86.9174	140.631	OK
YDR026C	YDR026C	-	IV:492555-494268	48.7065	37.75	59.6629	OK	35.2885	27.2586	43.3183	OK	31.8212	24.545	39.0975	OK	28.0916	21.6113	34.5718	OK
YDR027C	YDR027C	VPS54	IV:494648-497318	36.2935	28.1665	44.4205	OK	41.8278	32.5168	51.1388	OK	23.6943	18.3353	29.0534	OK	27.3472	21.2084	33.4859	OK
YDR028C	YDR028C	REG1	IV:497834-500879	105.047	79.7253	130.369	OK	122.876	93.3394	152.413	OK	89.0917	68.4224	109.761	OK	102.976	78.7304	127.221	OK
YDR029W	YDR029W	-	IV:501099-501414	0	0	0	OK	1.23857	0	2.85287	OK	0.345816	0	1.23778	OK	0.479881	0	1.46913	OK
YDR030C	YDR030C	RAD28	IV:501752-503273	23.4246	17.7974	29.0518	OK	14.2538	10.5634	17.9442	OK	19.3084	14.5427	24.0741	OK	20.2794	15.3221	25.2366	OK
YDR031W	YDR031W	MIC14	IV:503497-503863	33.1385	22.1351	44.1418	OK	41.4928	28.828	54.1575	OK	36.3247	24.9013	47.7481	OK	55.9879	39.9952	71.9807	OK
YDR032C	YDR032C	PST2	IV:504098-504695	56.7785	42.4519	71.1051	OK	163.436	126.705	200.167	OK	133.32	103.146	163.493	OK	222.415	172.994	271.837	OK
YDR033W	YDR033W	MRH1	IV:508146-509109	488.103	370.035	606.171	OK	382.992	292.654	473.33	OK	454.342	345.181	563.503	OK	312.106	239.872	384.34	OK
YDR034C	YDR034C	LYS14	IV:509736-512109	64.4403	49.9919	78.8887	OK	59.8724	46.522	73.2228	OK	45.7792	35.602	55.9564	OK	47.5911	36.9805	58.2016	OK
YDR034C-A	YDR034C-A	-	IV:520515-520692	0	0	0	OK	0.870398	0	2.68875	OK	4.44892	1.8857	7.01215	OK	0	0	0	OK
YDR034C-C	YDR034C-C	-	IV:514042-519356	0	0	0	OK	0	0	0	OK	0	0	0	OK	0	0	0	OK
YDR034C-D	YDR034C-D	-	IV:514042-519356	1.7587	1.21248	2.30492	OK	1.94988	1.3704	2.52937	OK	6.25927	4.75207	7.76648	OK	5.34849	4.02218	6.6748	OK
YDR034W-B	YDR034W-B	-	IV:521313-521469	1.20987	0	3.33662	OK	3.09247	0.985574	5.19937	OK	70.0148	27.9795	112.05	OK	94.463	46.6937	142.232	OK
YDR035W	YDR035W	ARO3	IV:521815-522928	59.5477	46.0303	73.0651	OK	76.4209	59.313	93.5288	OK	101.301	78.7881	123.814	OK	97.6987	75.9845	119.413	OK
YDR036C	YDR036C	EHD3	IV:523210-524713	13.1056	9.62878	16.5824	OK	16.9272	12.6373	21.2172	OK	14.3145	10.5891	18.0398	OK	16.4478	12.2699	20.6256	OK
YDR037W	YDR037W	KRS1	IV:525439-527215	343.7	257.307	430.093	OK	175.493	134.497	216.489	OK	259.94	196.57	323.31	OK	156.571	120.253	192.889	OK
YDR038C	YDR038C	ENA5	IV:527421-530697	7.88607	5.91743	9.8547	OK	6.41617	4.76363	8.06872	OK	7.49479	5.60774	9.38183	OK	6.16248	4.56494	7.76002	OK
YDR039C	YDR039C	ENA2	IV:531306-534582	0.0538604	0	0.160782	OK	0.133885	0	0.285168	OK	0.0747095	0	0.203144	OK	0.0246822	0	0.0982241	OK
YDR040C	YDR040C	ENA1	IV:535191-538467	11.6518	8.89867	14.4049	OK	51.2574	39.7522	62.7625	OK	20.9344	16.1954	25.6734	OK	76.9857	59.2627	94.7087	OK
YDR041W	YDR041W	RSM10	IV:539802-540414	41.7207	30.748	52.6934	OK	100.689	77.395	123.983	OK	46.3849	34.5291	58.2408	OK	92.6326	71.1406	114.125	OK
YDR042C	YDR042C	-	IV:540600-541203	4.85918	2.3379	7.38045	OK	2.77329	0.914622	4.63196	OK	7.00481	3.96902	10.0406	OK	5.84161	3.10332	8.5799	OK
YDR043C	YDR043C	NRG1	IV:542673-543369	7.94564	4.90647	10.9848	OK	15.5496	10.7822	20.317	OK	10.8026	7.04272	14.5624	OK	18.242	12.9366	23.5475	OK
YDR044W	YDR044W	HEM13	IV:546641-547628	31.2271	23.4344	39.0198	OK	39.4406	30.0071	48.874	OK	51.3481	39.4108	63.2854	OK	40.0873	30.5362	49.6383	OK
YDR045C	YDR045C	RPC11	IV:547977-548310	52.8699	36.98	68.7598	OK	14.1331	7.22773	21.0385	OK	35.7151	23.8019	47.6284	OK	20.6374	12.2654	29.0095	OK
YDR046C	YDR046C	BAP3	IV:548761-550576	216.788	164.532	269.045	OK	212.956	162.054	263.858	OK	235.29	178.341	292.239	OK	243.305	184.293	302.317	OK
YDR047W	YDR047W	HEM12	IV:551859-552948	20.5614	15.2258	25.897	OK	14.9955	10.838	19.153	OK	11.667	8.29714	15.0369	OK	10.9011	7.74788	14.0543	OK
YDR048C	YDR048C	-	IV:553083-555152	0.310415	0	1.92143	OK	0.212262	0	1.48951	OK	1.21674	0	5.12812	OK	1.6542	0	5.80769	OK
YDR049W	YDR049W	VMS1	IV:553083-555152	24.287	18.6329	29.941	OK	16.4388	12.4369	20.4407	OK	17.0881	12.9359	21.2404	OK	14.486	10.8818	18.0903	OK
YDR050C	YDR050C	TPI1	IV:555725-556472	1421.02	1030.83	1811.21	OK	1198.14	885.354	1510.93	OK	972.189	726.576	1217.8	OK	682.881	517.507	848.255	OK
YDR051C	YDR051C	DET1	IV:557055-558060	35.5896	26.9917	44.1875	OK	30.7999	23.1764	38.4234	OK	26.821	20.0432	33.5989	OK	27.9193	20.9276	34.911	OK
YDR052C	YDR052C	DBF4	IV:558510-560644	33.219	25.6202	40.8178	OK	26.3507	20.3349	32.3665	OK	20.8515	15.9957	25.7074	OK	17.5767	13.4028	21.7507	OK
YDR053W	YDR053W	-	IV:558510-560644	0.10976	0	1.08523	OK	0.22828	0	1.64554	OK	0.331911	0	1.70417	OK	0.320806	0	1.60168	OK
YDR054C	YDR054C	CDC34	IV:561439-562327	42.8728	32.5641	53.1814	OK	43.2258	32.8366	53.615	OK	35.6329	26.8406	44.4252	OK	37.9635	28.6816	47.2454	OK
YDR055W	YDR055W	PST1	IV:563526-564861	55.4285	42.9174	67.9396	OK	112.391	87.2098	137.572	OK	102.223	79.4657	124.98	OK	167.547	129.503	205.591	OK
YDR056C	YDR056C	-	IV:565022-565640	76.2048	58.1262	94.2833	OK	82.353	63.0176	101.688	OK	72.0597	54.8688	89.2506	OK	80.1394	61.3302	98.9487	OK
YDR057W	YDR057W	YOS9	IV:565926-567555	36.8285	28.4586	45.1983	OK	36.5354	28.2212	44.8496	OK	42.8176	33.1185	52.5167	OK	39.9948	30.9364	49.0533	OK
YDR058C	YDR058C	TGL2	IV:567722-568703	7.84743	5.23605	10.4588	OK	14.8712	10.6213	19.1212	OK	9.23312	6.31927	12.147	OK	15.6252	11.1902	20.0601	OK
YDR059C	YDR059C	UBC5	IV:569233-569770	6.40281	2.7648	10.0408	OK	14.4513	8.86927	20.0333	OK	28.4636	19.723	37.2043	OK	37.0177	26.1849	47.8505	OK
YDR060W	YDR060W	MAK21	IV:570648-573726	157.698	118.408	196.988	OK	8.18153	6.13302	10.23	OK	80.795	62.1612	99.4288	OK	17.2527	13.3155	21.1899	OK
YDR061W	YDR061W	-	IV:574163-575783	38.6589	29.8935	47.4242	OK	51.5647	40.0483	63.0812	OK	48.2366	37.4251	59.0482	OK	47.958	37.1745	58.7416	OK
YDR062W	YDR062W	LCB2	IV:576473-578159	223.857	170.595	277.119	OK	150.777	116.233	185.321	OK	182.5	139.924	225.076	OK	127.788	98.8218	156.755	OK
YDR063W	YDR063W	AIM7	IV:578662-579112	29.7467	20.6247	38.8687	OK	48.0463	34.6926	61.4001	OK	32.0066	22.5542	41.4591	OK	41.9131	30.0418	53.7844	OK
YDR064W	YDR064W	RPS13	IV:579457-580452	975.766	745.327	1206.21	OK	319.34	248.366	390.314	OK	682.065	526.665	837.464	OK	231.926	179.922	283.93	OK
YDR065W	YDR065W	RRG1	IV:580686-581784	37.1706	28.3762	45.9649	OK	24.3987	18.2214	30.5761	OK	33.153	25.1399	41.166	OK	26.5337	19.9328	33.1346	OK
YDR066C	YDR066C	RTR2	IV:581907-582498	9.3963	5.6962	13.0964	OK	8.036	4.68045	11.3916	OK	7.73342	4.43027	11.0366	OK	6.35741	3.41559	9.29923	OK
YDR067C	YDR067C	OCA6	IV:582790-583465	10.8781	7.07184	14.6845	OK	13.5089	9.11261	17.9052	OK	9.2071	5.79358	12.6206	OK	14.3139	9.77616	18.8517	OK
YDR068W	YDR068W	DOS2	IV:583712-584645	43.6665	33.2124	54.1206	OK	58.258	44.8455	71.6704	OK	37.3315	28.2644	46.3987	OK	53.315	40.916	65.714	OK
YDR069C	YDR069C	DOA4	IV:584938-587719	15.5352	11.9073	19.1631	OK	20.9232	16.1592	25.6871	OK	18.242	14.0646	22.4193	OK	22.5409	17.4413	27.6406	OK
YDR070C	YDR070C	FMP16	IV:588097-588379	2.37505	0	5.74333	OK	13.9797	5.99699	21.9624	OK	13.3075	5.69475	20.9203	OK	43.6988	28.4981	58.8995	OK
YDR071C	YDR071C	PAA1	IV:588826-589402	63.1626	47.5261	78.7992	OK	74.1808	56.3002	92.0613	OK	65.5152	49.4172	81.6132	OK	64.0103	48.2848	79.7359	OK
YDR072C	YDR072C	IPT1	IV:589760-591344	57.3373	44.5587	70.1159	OK	24.641	18.8133	30.4686	OK	49.4929	38.3962	60.5896	OK	29.3236	22.5279	36.1192	OK
YDR073W	YDR073W	SNF11	IV:592438-592948	24.3458	16.9249	31.7668	OK	16.7649	10.9874	22.5424	OK	14.997	9.63407	20.36	OK	11.539	7.07392	16.0042	OK
YDR074W	YDR074W	TPS2	IV:593892-596583	53.7816	41.673	65.8902	OK	131.358	99.9509	162.765	OK	162.5	122.768	202.233	OK	178.078	134.361	221.795	OK
YDR075W	YDR075W	PPH3	IV:597155-598082	27.822	20.7122	34.9318	OK	11.9731	8.39815	15.5481	OK	16.3828	11.738	21.0276	OK	13.5705	9.69653	17.4446	OK
YDR076W	YDR076W	RAD55	IV:598467-599688	12.5693	9.06767	16.071	OK	10.9097	7.77331	14.0461	OK	14.2745	10.4048	18.1443	OK	14.1907	10.3191	18.0623	OK
YDR077W	YDR077W	SED1	IV:600792-601809	134.67	104.477	164.863	OK	272.814	208.552	337.076	OK	478.752	361.414	596.091	OK	636.126	470.165	802.088	OK
YDR078C	YDR078C	SHU2	IV:602197-602869	10.7884	6.95954	14.6172	OK	8.1713	4.99313	11.3495	OK	11.2623	7.38043	15.1441	OK	10.2341	6.58272	13.8854	OK
YDR079C-A	YDR079C-A	TFB5	IV:603592-603811	50.7952	28.8678	72.7225	OK	44.6118	24.5924	64.6311	OK	53.0068	31.3355	74.678	OK	50.9483	30.0737	71.8228	OK
YDR079W	YDR079W	PET100	IV:603063-603399	13.2662	6.58185	19.9505	OK	19.983	11.6201	28.3459	OK	13.0219	6.5814	19.4624	OK	27.7819	17.6435	37.9203	OK
YDR080W	YDR080W	VPS41	IV:604007-606986	31.9186	24.8	39.0371	OK	33.7304	26.2252	41.2356	OK	30.0289	23.3298	36.728	OK	31.9316	24.8298	39.0334	OK
YDR081C	YDR081C	PDC2	IV:607303-610081	37.6243	29.2256	46.0229	OK	25.3663	19.667	31.0655	OK	24.0432	18.6294	29.457	OK	21.4445	16.5849	26.3041	OK
YDR082W	YDR082W	STN1	IV:610440-611925	20.3196	15.326	25.3131	OK	18.1658	13.6246	22.7069	OK	15.0637	11.1812	18.9462	OK	18.1141	13.5863	22.6419	OK
YDR083W	YDR083W	RRP8	IV:612072-613251	55.0021	42.5301	67.4741	OK	3.4291	2.01877	4.83943	OK	26.2994	19.8381	32.7607	OK	5.82871	3.82318	7.83423	OK
YDR084C	YDR084C	TVP23	IV:613404-614004	25.9078	18.3993	33.4163	OK	31.1247	22.4977	39.7518	OK	26.5096	18.8625	34.1568	OK	26.9159	19.2698	34.5619	OK
YDR085C	YDR085C	AFR1	IV:614287-616150	10.0411	7.38346	12.6987	OK	34.7178	26.8662	42.5694	OK	34.1361	26.4148	41.8573	OK	54.5063	42.3744	66.6383	OK
YDR086C	YDR086C	SSS1	IV:616927-617170	67.8552	44.5535	91.157	OK	87.254	59.7665	114.741	OK	95.3753	66.6299	124.121	OK	70.5936	47.2641	93.9232	OK
YDR087C	YDR087C	RRP1	IV:617469-618306	63.1689	48.4762	77.8615	OK	5.3933	3.1785	7.6081	OK	33.3903	24.9498	41.8308	OK	9.51006	6.34158	12.6785	OK
YDR088C	YDR088C	SLU7	IV:618496-619645	20.0243	14.8183	25.2303	OK	17.2863	12.6843	21.8883	OK	17.6617	12.9997	22.3237	OK	20.2929	15.0734	25.5124	OK
YDR089W	YDR089W	-	IV:622111-624721	31.6708	24.6	38.7416	OK	42.5469	33.0907	52.0031	OK	17.6034	13.5096	21.6971	OK	23.0743	17.8449	28.3037	OK
YDR090C	YDR090C	-	IV:625065-625998	26.1662	19.4181	32.9143	OK	137.258	106.692	167.825	OK	26.715	19.8695	33.5606	OK	85.5957	66.3753	104.816	OK
YDR091C	YDR091C	RLI1	IV:626707-628534	63.8704	49.631	78.1099	OK	11.7478	8.6971	14.7985	OK	37.7839	29.2785	46.2894	OK	12.214	9.07831	15.3498	OK
YDR092W	YDR092W	UBC13	IV:629875-630605	41.3861	29.5716	53.2006	OK	59.5397	43.7914	75.2879	OK	57.4054	42.2575	72.5533	OK	63.5558	47.0942	80.0174	OK
YDR093W	YDR093W	DNF2	IV:631281-636527	132	97.7939	166.206	OK	82.557	62.2886	102.825	OK	85.1497	64.1806	106.119	OK	59.4414	45.2381	73.6448	OK
YDR094W	YDR094W	-	IV:631281-636527	62.5651	0	184.787	OK	58.1416	0	165.777	OK	55.5877	0	152.671	OK	49.0283	0	114.832	OK
YDR095C	YDR095C	-	IV:631281-636527	0.0949063	0	2.81815	OK	0.131058	0	2.60548	OK	0	0	0	OK	0	0	0	OK
YDR096W	YDR096W	GIS1	IV:637138-639823	4.65897	3.32274	5.9952	OK	4.85741	3.46615	6.24866	OK	9.00993	6.73423	11.2856	OK	6.06769	4.42733	7.70804	OK
YDR097C	YDR097C	MSH6	IV:640108-643837	38.1864	29.5852	46.7877	OK	36.5356	28.3972	44.6741	OK	32.3653	25.1532	39.5775	OK	30.6265	23.8153	37.4378	OK
YDR098C	YDR098C	GRX3	IV:644177-645035	44.3455	33.6117	55.0793	OK	53.6788	40.9823	66.3754	OK	47.4505	36.1381	58.7628	OK	55.5261	42.5552	68.4971	OK
YDR098C-A	YDR098C-A	-	IV:645857-651126	0	0	0	OK	0	0	0	OK	0	0	0	OK	0	0	0	OK
YDR098C-B	YDR098C-B	-	IV:645857-651126	1.1507	0.751633	1.54976	OK	1.11374	0.725524	1.50195	OK	3.82198	2.833	4.81097	OK	3.47493	2.54544	4.40443	OK
YDR099W	YDR099W	BMH2	IV:653606-654428	109.286	84.7618	133.811	OK	250.992	194.609	307.375	OK	155.88	121.125	190.634	OK	223.65	173.622	273.678	OK
YDR100W	YDR100W	TVP15	IV:655012-655444	30.3987	20.9807	39.8166	OK	54.6657	39.7581	69.5734	OK	40.3452	28.6108	52.0795	OK	55.4671	40.4139	70.5202	OK
YDR101C	YDR101C	ARX1	IV:655685-657467	102.488	79.4694	125.506	OK	4.57957	3.12548	6.03366	OK	49.1097	38.1716	60.0479	OK	8.87158	6.44236	11.3008	OK
YDR102C	YDR102C	-	IV:657647-657980	2.56677	0	5.67007	OK	2.68179	0	5.76695	OK	3.30988	0.0473004	6.57247	OK	1.92389	0	4.57137	OK
YDR103W	YDR103W	STE5	IV:658349-661103	23.2655	17.9594	28.5716	OK	21.0098	16.221	25.7985	OK	22.0825	17.0657	27.0992	OK	22.1362	17.1275	27.1449	OK
YDR104C	YDR104C	SPO71	IV:661172-664910	22.5586	17.501	27.6162	OK	24.6719	19.1695	30.1742	OK	22.2862	17.3225	27.2499	OK	24.0367	18.6918	29.3816	OK
YDR105C	YDR105C	TMS1	IV:665348-666770	40.8893	31.311	50.4676	OK	47.4528	36.7063	58.1993	OK	43.1626	33.2953	53.0299	OK	46.964	36.3224	57.6056	OK
YDR106W	YDR106W	ARP10	IV:667003-667858	3.11137	1.51157	4.71117	OK	2.15152	0.832057	3.47098	OK	3.96575	2.13759	5.79392	OK	2.10525	0.800837	3.40966	OK
YDR107C	YDR107C	TMN2	IV:669015-671034	25.6124	19.7006	31.5242	OK	37.5224	29.0889	45.956	OK	31.2917	24.2075	38.3759	OK	32.3584	25.0244	39.6923	OK
YDR108W	YDR108W	TRS85	IV:671268-673365	12.7667	9.57774	15.9557	OK	12.4732	9.35133	15.5951	OK	11.5065	8.58574	14.4274	OK	13.1702	9.90888	16.4315	OK
YDR109C	YDR109C	-	IV:673519-675667	17.8133	13.606	22.0207	OK	16.1696	12.2999	20.0392	OK	15.7924	12.0017	19.5831	OK	17.147	13.0815	21.2125	OK
YDR110W	YDR110W	FOB1	IV:676101-677802	46.5973	36.158	57.0367	OK	19.2891	14.6159	23.9623	OK	37.3265	28.8649	45.788	OK	26.5881	20.4191	32.7572	OK
YDR111C	YDR111C	ALT2	IV:678240-679852	38.2069	29.4842	46.9297	OK	14.0672	10.4217	17.7127	OK	24.2689	18.4743	30.0636	OK	12.7522	9.39048	16.1139	OK
YDR112W	YDR112W	IRC2	IV:678240-679852	0.824865	0	3.6966	OK	0	0	0	OK	0	0	0	OK	0	0	0	OK
YDR113C	YDR113C	PDS1	IV:680495-681617	10.1821	7.12777	13.2364	OK	14.7695	10.7031	18.8359	OK	7.48075	5.09067	9.87083	OK	7.99638	5.488	10.5048	OK
YDR114C	YDR114C	-	IV:681923-682492	0	0	0	OK	0	0	0	OK	0	0	0	OK	0	0	0	OK
YDR115W	YDR115W	-	IV:681923-682492	39.2383	25.7521	52.7245	OK	48.0989	32.6536	63.5442	OK	37.8009	24.9785	50.6234	OK	48.2807	33.2435	63.3179	OK
YDR116C	YDR116C	MRPL1	IV:682723-683581	13.0447	9.14685	16.9426	OK	16.3465	11.6324	21.0607	OK	12.4347	8.69398	16.1755	OK	14.0529	9.94807	18.1578	OK
YDR117C	YDR117C	TMA64	IV:683945-685643	27.318	20.9742	33.6619	OK	31.08	23.9583	38.2016	OK	22.8592	17.4604	28.258	OK	22.7413	17.3683	28.1143	OK
YDR118W	YDR118W	APC4	IV:685881-687884	18.7913	14.3215	23.261	OK	15.6274	11.8062	19.4486	OK	16.5671	12.5595	20.5746	OK	16.4178	12.4471	20.3886	OK
YDR118W-A	YDR118W-A	-	IV:685881-687884	22.0031	12.1132	31.893	OK	29.2322	17.931	40.5335	OK	13.3667	9.182	17.5514	OK	0	0	0	OK
YDR119W	YDR119W	VBA4	IV:688226-690533	111.467	85.772	137.161	OK	77.1804	59.8294	94.5313	OK	84.968	65.8195	104.116	OK	61.999	48.1253	75.8728	OK
YDR119W-A	YDR119W-A	-	IV:691013-691214	5.15974	0	13.1628	OK	45.3736	22.8025	67.9448	OK	19.2542	5.19878	33.3096	OK	49.5318	26.7815	72.2822	OK
YDR120C	YDR120C	TRM1	IV:691548-693261	67.1721	52.1811	82.1631	OK	7.13052	5.07579	9.18524	OK	41.4636	32.0972	50.83	OK	14.6229	10.9091	18.3367	OK
YDR121W	YDR121W	DPB4	IV:693584-694175	14.2663	9.44801	19.0845	OK	6.27353	3.35447	9.19258	OK	8.98435	5.42344	12.5453	OK	5.31429	2.66128	7.9673	OK
YDR122W	YDR122W	KIN1	IV:694699-697894	35.9933	27.9067	44.0799	OK	66.2369	51.1994	81.2744	OK	50.1157	38.8783	61.3531	OK	61.4008	47.5229	75.2788	OK
YDR123C	YDR123C	INO2	IV:698553-699468	11.3173	7.88008	14.7545	OK	9.67209	6.58508	12.7591	OK	13.1657	9.29433	17.037	OK	11.9365	8.38669	15.4863	OK
YDR124W	YDR124W	-	IV:700314-701289	4.94351	2.99467	6.89235	OK	3.25565	1.7199	4.7914	OK	6.28707	4.00546	8.56868	OK	4.78344	2.87702	6.68987	OK
YDR125C	YDR125C	ECM18	IV:701396-702758	11.8433	8.58902	15.0976	OK	11.694	8.47853	14.9095	OK	11.6795	8.44652	14.9126	OK	17.4018	12.9523	21.8512	OK
YDR126W	YDR126W	SWF1	IV:703233-704244	5.93824	3.76494	8.11154	OK	4.69233	2.84907	6.5356	OK	5.31072	3.30375	7.31768	OK	4.53161	2.71861	6.34461	OK
YDR127W	YDR127W	ARO1	IV:704483-709250	116.02	86.9384	145.101	OK	112.29	84.2829	140.298	OK	127.059	94.9141	159.203	OK	127.182	94.9452	159.418	OK
YDR128W	YDR128W	MTC5	IV:709548-712995	29.8912	23.1684	36.6139	OK	32.3069	25.1103	39.5035	OK	31.8867	24.779	38.9944	OK	36.0279	28.0039	44.0518	OK
YDR129C	YDR129C	SAC6	IV:713339-715379	127.643	98.3756	156.911	OK	220.96	167.587	274.334	OK	160.565	123.079	198.051	OK	204.923	155.875	253.97	OK
YDR130C	YDR130C	FIN1	IV:715746-716622	39.4596	29.8265	49.0927	OK	34.6838	26.0242	43.3434	OK	34.4454	25.8549	43.0358	OK	31.562	23.5932	39.5308	OK
YDR131C	YDR131C	-	IV:716789-718460	18.2273	13.7542	22.7004	OK	21.9547	16.7204	27.1889	OK	17.9074	13.5113	22.3035	OK	19.8396	15.0503	24.6289	OK
YDR132C	YDR132C	-	IV:718815-720303	14.5821	10.7973	18.3668	OK	13.0948	9.63502	16.5545	OK	12.2211	8.9465	15.4957	OK	11.7628	8.56181	14.9637	OK
YDR133C	YDR133C	-	IV:720961-721481	30.2912	11.8589	48.7235	OK	38.6051	18.7486	58.4616	OK	33.8656	10.1886	57.5426	OK	42.2989	21.2545	63.3433	OK
YDR134C	YDR134C	-	IV:720961-721481	50.1814	32.68	67.6829	OK	62.2619	42.4331	82.0907	OK	91.1322	64.0889	118.175	OK	76.3448	53.2608	99.4287	OK
YDR135C	YDR135C	YCF1	IV:723003-727551	93.0774	70.3281	115.827	OK	90.6676	68.7121	112.623	OK	96.3856	72.8646	119.907	OK	85.7298	65.0668	106.393	OK
YDR136C	YDR136C	VPS61	IV:727710-730250	1.75737	0	6.19011	OK	0.386713	0	2.14345	OK	1.16023	0	4.13562	OK	0.533617	0	2.31298	OK
YDR137W	YDR137W	RGP1	IV:727710-730250	51.2432	39.7725	62.7139	OK	44.8991	34.8921	54.9062	OK	43.4734	33.7538	53.1931	OK	40.6635	31.5358	49.7911	OK
YDR138W	YDR138W	HPR1	IV:730577-732836	30.1472	23.3346	36.9598	OK	21.0755	16.1912	25.9598	OK	22.8579	17.6116	28.1042	OK	21.3611	16.4403	26.2819	OK
YDR139C	YDR139C	RUB1	IV:733617-733924	116.168	80.5488	151.787	OK	117.786	82.8598	152.712	OK	113.303	79.7522	146.854	OK	113.421	80.0786	146.763	OK
YDR140W	YDR140W	MTQ2	IV:734137-734803	24.2501	17.3443	31.156	OK	22.8712	16.2675	29.475	OK	21.0747	15.0012	27.1483	OK	24.7552	17.7744	31.7361	OK
YDR141C	YDR141C	DOP1	IV:734900-739997	39.3325	30.3558	48.3092	OK	38.2645	29.5946	46.9344	OK	35.5339	27.5424	43.5254	OK	37.5984	29.1022	46.0946	OK
YDR142C	YDR142C	PEX7	IV:740472-741600	19.0234	14.04	24.0069	OK	19.5074	14.4274	24.5875	OK	16.9902	12.4548	21.5256	OK	22.8792	17.0883	28.6701	OK
YDR143C	YDR143C	SAN1	IV:742041-743874	31.7415	24.5048	38.9782	OK	14.2894	10.6983	17.8806	OK	22.6688	17.3616	27.976	OK	15.6311	11.7635	19.4988	OK
YDR144C	YDR144C	MKC7	IV:744310-746101	54.9582	42.7214	67.1951	OK	17.4735	13.2083	21.7387	OK	43.6893	33.8937	53.4848	OK	13.6137	10.1661	17.0613	OK
YDR145W	YDR145W	TAF12	IV:746737-748357	53.3153	41.2657	65.3649	OK	42.1196	32.6143	51.625	OK	46.8252	36.3207	57.3296	OK	38.6957	29.9296	47.4617	OK
YDR146C	YDR146C	SWI5	IV:748612-750742	14.1712	10.6667	17.6756	OK	17.9719	13.7227	22.2212	OK	19.5117	14.8993	24.1241	OK	20.1933	15.4892	24.8975	OK
YDR147W	YDR147W	EKI1	IV:751630-753235	22.9825	17.5078	28.4572	OK	23.8569	18.1984	29.5154	OK	15.7493	11.7785	19.7201	OK	19.1266	14.4541	23.7991	OK
YDR148C	YDR148C	KGD2	IV:753674-755066	34.6463	26.6069	42.6857	OK	75.8706	58.9801	92.7612	OK	51.3778	39.8144	62.9412	OK	77.6045	60.3599	94.8492	OK
YDR149C	YDR149C	-	IV:755554-763874	1.48442	0	13.8145	OK	1.13094	0	12.1243	OK	0.732137	0	8.02286	OK	2.03041	0	16.9007	OK
YDR150W	YDR150W	NUM1	IV:755554-763874	93.4554	67.9042	119.007	OK	92.0558	67.5624	116.549	OK	87.7651	64.8946	110.636	OK	102.559	75.2369	129.881	OK
YDR151C	YDR151C	CTH1	IV:764177-765155	20.5718	15.0953	26.0483	OK	28.5817	21.3991	35.7642	OK	22.7468	16.814	28.6796	OK	27.871	20.845	34.8969	OK
YDR152W	YDR152W	GIR2	IV:765705-766503	81.9473	63.2415	100.653	OK	25.2742	18.4876	32.0609	OK	64.4324	49.4896	79.3751	OK	32.6936	24.3388	41.0484	OK
YDR153C	YDR153C	ENT5	IV:766735-767971	22.8467	17.0928	28.6005	OK	15.9548	11.7095	20.2001	OK	17.7523	13.1402	22.3643	OK	14.1759	10.3394	18.0124	OK
YDR154C	YDR154C	-	IV:768402-769000	394.247	245.861	542.634	OK	704.848	438.854	970.842	OK	693.575	430.754	956.397	OK	758.671	470.417	1046.93	OK
YDR155C	YDR155C	CPR1	IV:768402-769000	324.071	225.454	422.688	OK	558.786	382.446	735.125	OK	583.988	403.135	764.841	OK	656.894	451.796	861.993	OK
YDR156W	YDR156W	RPA14	IV:769524-770332	9.02916	4.35634	13.702	OK	1.8468	0	4.01631	OK	7.64903	3.05803	12.24	OK	2.91969	0.180967	5.65842	OK
YDR157W	YDR157W	-	IV:769524-770332	3.44166	0.328444	6.55488	OK	0.390171	0	1.34447	OK	1.92024	0	4.80533	OK	0.626091	0	1.88334	OK
YDR158W	YDR158W	HOM2	IV:770356-771454	220.603	169.482	271.724	OK	220.579	170.282	270.875	OK	372.818	283.789	461.847	OK	307.705	235.466	379.944	OK
YDR159W	YDR159W	SAC3	IV:771876-775782	34.0068	26.2883	41.7254	OK	30.0427	23.3254	36.7599	OK	23.4521	18.233	28.6711	OK	25.3937	19.7464	31.0409	OK
YDR160W	YDR160W	SSY1	IV:776162-778721	33.4882	26.0391	40.9374	OK	34.0073	26.4386	41.5761	OK	25.3337	19.6134	31.054	OK	28.2061	21.8776	34.5345	OK
YDR161W	YDR161W	-	IV:779042-780206	41.9948	32.2468	51.7428	OK	5.77074	3.78776	7.75372	OK	25.2762	18.9735	31.5789	OK	8.98566	6.31341	11.6579	OK
YDR162C	YDR162C	NBP2	IV:780389-781100	33.6947	24.891	42.4984	OK	47.4162	35.7057	59.1267	OK	41.5168	31.0665	51.9671	OK	55.3776	42.0137	68.7414	OK
YDR163W	YDR163W	CWC15	IV:781422-781950	14.7064	9.51711	19.8957	OK	18.4058	12.369	24.4425	OK	18.7515	12.69	24.8129	OK	23.2021	16.1775	30.2267	OK
YDR164C	YDR164C	SEC1	IV:782040-784215	30.633	23.7144	37.5516	OK	29.4397	22.785	36.0943	OK	28.8736	22.3383	35.4089	OK	28.8433	22.3213	35.3654	OK
YDR165W	YDR165W	TRM82	IV:784870-786205	27.7302	21.0944	34.3661	OK	1.78537	0.842835	2.72791	OK	13.4057	9.7832	17.0282	OK	2.7992	1.58513	4.01326	OK
YDR166C	YDR166C	SEC5	IV:786305-789221	42.3108	32.8519	51.7697	OK	39.9517	31.0237	48.8797	OK	35.7334	27.7913	43.6755	OK	34.2608	26.6463	41.8754	OK
YDR167W	YDR167W	TAF10	IV:789448-790069	51.3663	38.4692	64.2635	OK	51.4836	38.5679	64.3993	OK	45.7609	34.0802	57.4417	OK	48.6375	36.3542	60.9208	OK
YDR168W	YDR168W	CDC37	IV:790327-791848	51.3672	39.8197	62.9146	OK	91.6942	71.2774	112.111	OK	73.7953	57.3686	90.222	OK	96.9187	75.3527	118.485	OK
YDR169C	YDR169C	STB3	IV:792347-793889	6.65407	4.63772	8.67042	OK	8.86175	6.31477	11.4087	OK	10.9981	7.99136	14.0047	OK	10.931	7.92274	13.9393	OK
YDR169C-A	YDR169C-A	-	IV:794573-794723	1.42969	0	3.6502	OK	2.9053	0	6.68031	OK	0	0	0	OK	0	0	0	OK
YDR170C	YDR170C	SEC7	IV:796192-802222	75.206	56.2873	94.1248	OK	90.3434	67.6021	113.085	OK	65.3368	49.5631	81.1105	OK	78.7147	59.3804	98.0489	OK
YDR170W-A	YDR170W-A	-	IV:803194-804517	5.1409	3.36969	6.91211	OK	10.6932	7.65582	13.7305	OK	8.77978	6.18379	11.3758	OK	16.6115	12.2773	20.9457	OK
YDR171W	YDR171W	HSP42	IV:806620-807748	29.9476	22.6748	37.2204	OK	101.43	78.78	124.081	OK	109.352	84.8953	133.808	OK	125.97	97.8959	154.045	OK
YDR172W	YDR172W	SUP35	IV:808323-810381	301.586	224.995	378.177	OK	135.076	103.827	166.325	OK	187.038	142.273	231.802	OK	119.581	92.2577	146.905	OK
YDR173C	YDR173C	ARG82	IV:810564-811632	7.44684	4.98854	9.90513	OK	5.60855	3.57451	7.6426	OK	8.49215	5.83164	11.1527	OK	9.15416	6.36268	11.9456	OK
YDR174W	YDR174W	HMO1	IV:812109-812850	101.816	78.7868	124.846	OK	111.326	86.2901	136.362	OK	48.7097	36.7788	60.6407	OK	48.2151	36.4592	59.971	OK
YDR175C	YDR175C	RSM24	IV:813192-814152	26.7409	19.9136	33.5682	OK	31.5136	23.6733	39.354	OK	21.8637	16.1031	27.6243	OK	24.8871	18.4795	31.2947	OK
YDR176W	YDR176W	NGG1	IV:814451-816560	54.5045	42.235	66.7739	OK	56.3278	43.7906	68.865	OK	38.1375	29.6017	46.6733	OK	40.6085	31.5667	49.6502	OK
YDR177W	YDR177W	UBC1	IV:816877-817525	55.3949	41.6347	69.1551	OK	54.184	40.7781	67.5899	OK	84.441	64.848	104.034	OK	79.5291	60.9453	98.113	OK
YDR178W	YDR178W	SDH4	IV:817949-818495	18.1231	12.2602	23.9861	OK	43.0076	31.5363	54.4789	OK	44.7382	32.9101	56.5663	OK	62.0857	46.4019	77.7696	OK
YDR179C	YDR179C	CSN9	IV:818707-819196	28.3718	19.9106	36.833	OK	24.1743	16.6067	31.7419	OK	25.3508	17.6041	33.0976	OK	36.4931	26.0855	46.9008	OK
YDR179W-A	YDR179W-A	-	IV:819432-820824	19.9308	14.9566	24.905	OK	14.8971	10.9888	18.8053	OK	15.6113	11.5688	19.6538	OK	18.5142	13.8431	23.1854	OK
YDR180W	YDR180W	SCC2	IV:821294-825776	39.8165	30.7472	48.8858	OK	25.1015	19.5002	30.7027	OK	34.9488	27.1172	42.7804	OK	22.1767	17.2493	27.1041	OK
YDR181C	YDR181C	SAS4	IV:825909-827355	16.3672	12.1671	20.5673	OK	19.7181	14.8138	24.6225	OK	14.8046	10.9531	18.656	OK	18.4886	13.8632	23.114	OK
YDR182W	YDR182W	CDC1	IV:827581-829057	50.0426	38.7714	61.3138	OK	69.6339	54.1491	85.1187	OK	53.6658	41.636	65.6956	OK	55.8082	43.3199	68.2966	OK
YDR182W-A	YDR182W-A	-	IV:829150-829354	5.418	0	13.0717	OK	5.65417	0	13.1386	OK	1.00768	0	2.51948	OK	1.30683	0	3.09574	OK
YDR183C-A	YDR183C-A	-	IV:830396-831513	9.46342	0.0607586	18.8661	OK	0	0	0	OK	8.13756	0.691877	15.5833	OK	2.17179	0	5.8229	OK
YDR183W	YDR183W	PLP1	IV:829584-830277	9.80272	6.29224	13.3132	OK	11.6496	7.69296	15.6062	OK	11.8069	7.85122	15.7626	OK	12.146	8.10283	16.1892	OK
YDR184C	YDR184C	ATC1	IV:830396-831513	9.10731	5.98997	12.2247	OK	0.368871	0	0.934375	OK	6.43024	3.96689	8.89359	OK	1.59575	0.297859	2.89363	OK
YDR185C	YDR185C	UPS3	IV:831933-832473	10.0706	5.99447	14.1466	OK	4.84701	2.11595	7.57806	OK	13.2496	8.43683	18.0624	OK	10.3469	6.27697	14.4169	OK
YDR186C	YDR186C	-	IV:832858-835492	49.0397	37.8442	60.2353	OK	51.8421	40.2979	63.3862	OK	40.8418	31.722	49.9615	OK	42.6413	33.1518	52.1308	OK
YDR187C	YDR187C	-	IV:836227-838061	1.48862	0	10.4373	OK	0.853808	0	7.58884	OK	0.163532	0	2.47369	OK	0.943722	0	7.65811	OK
YDR188W	YDR188W	CCT6	IV:836227-838061	230.514	175.546	285.482	OK	225.087	171.578	278.596	OK	224.629	171.237	278.021	OK	206.481	157.802	255.16	OK
YDR189W	YDR189W	SLY1	IV:838391-840392	33.9033	26.1967	41.6099	OK	33.3885	25.8543	40.9228	OK	26.5216	20.449	32.5941	OK	27.0911	20.9017	33.2805	OK
YDR190C	YDR190C	RVB1	IV:840603-841995	117.275	91.0739	143.477	OK	57.866	44.894	70.838	OK	92.6393	72.0344	113.244	OK	50.4269	39.0741	61.7798	OK
YDR191W	YDR191W	HST4	IV:842336-843449	7.18115	4.83961	9.52269	OK	7.35248	4.97381	9.73115	OK	9.38834	6.58082	12.1959	OK	7.42764	5.04328	9.812	OK
YDR192C	YDR192C	NUP42	IV:843568-844952	5.69864	3.79841	7.59888	OK	4.50928	2.88139	6.13717	OK	5.78215	3.84763	7.71666	OK	4.35537	2.76551	5.94523	OK
YDR193W	YDR193W	-	IV:843568-844952	0.201573	0	1.01471	OK	0.137731	0	0.82205	OK	0.717163	0	2.40544	OK	0	0	0	OK
YDR194C	YDR194C	MSS116	IV:845951-847946	104.809	81.0594	128.559	OK	76.7807	59.6577	93.9038	OK	81.3519	63.1393	99.5645	OK	71.9542	55.9645	87.944	OK
YDR194W-A	YDR194W-A	-	IV:848070-848223	0	0	0	OK	0	0	0	OK	0	0	0	OK	0	0	0	OK
YDR195W	YDR195W	REF2	IV:848598-850200	12.5292	9.23869	15.8198	OK	11.8767	8.72513	15.0282	OK	12.4478	9.17452	15.7211	OK	15.0671	11.2337	18.9004	OK
YDR196C	YDR196C	CAB5	IV:850273-850999	30.0861	22.092	38.0802	OK	35.0993	26.0353	44.1633	OK	33.7499	24.9484	42.5515	OK	49.6073	37.5204	61.6942	OK
YDR197W	YDR197W	CBS2	IV:851227-852397	10.9163	7.74399	14.0887	OK	9.91819	7.03121	12.8052	OK	8.56357	5.96562	11.1615	OK	11.9947	8.56165	15.4277	OK
YDR198C	YDR198C	RKM2	IV:852532-853972	23.5313	17.8231	29.2395	OK	12.0597	8.79453	15.3248	OK	18.9976	14.2354	23.7597	OK	11.3351	8.22384	14.4464	OK
YDR199W	YDR199W	-	IV:854174-856093	1.04469	0	4.05259	OK	0.849648	0	3.38704	OK	1.28727	0	4.46574	OK	0.366049	0	1.77952	OK
YDR200C	YDR200C	VPS64	IV:854174-856093	16.6548	12.535	20.7746	OK	21.4731	16.3847	26.5614	OK	16.7806	12.66	20.9011	OK	20.5958	15.7077	25.4838	OK
YDR201W	YDR201W	SPC19	IV:856316-856814	24.3768	16.8211	31.9326	OK	35.0327	24.9524	45.1131	OK	21.7053	14.757	28.6536	OK	23.1359	15.9097	30.3621	OK
YDR202C	YDR202C	RAV2	IV:856897-857999	18.567	13.5841	23.5498	OK	27.205	20.3907	34.0194	OK	20.0644	14.7685	25.3603	OK	30.7756	23.2027	38.3485	OK
YDR203W	YDR203W	-	IV:856897-857999	1.86996	0	6.58146	OK	1.10373	0	4.22899	OK	1.21887	0	3.86283	OK	0.47134	0	2.16374	OK
YDR204W	YDR204W	COQ4	IV:858136-859144	24.6949	18.2869	31.1029	OK	55.1965	42.5239	67.869	OK	37.976	28.8801	47.0719	OK	60.732	46.8885	74.5755	OK
YDR205W	YDR205W	MSC2	IV:859345-861520	11.5241	8.60777	14.4405	OK	9.75987	7.22105	12.2987	OK	14.2593	10.75	17.7686	OK	11.1335	8.32006	13.9469	OK
YDR206W	YDR206W	EBS1	IV:862053-864708	73.4552	56.8813	90.0291	OK	43.1927	33.5831	52.8023	OK	46.5746	36.2137	56.9354	OK	42.0528	32.6973	51.4083	OK
YDR207C	YDR207C	UME6	IV:865011-867522	5.7963	4.1672	7.4254	OK	3.75909	2.62774	4.89044	OK	6.97543	5.10303	8.84784	OK	4.05889	2.86856	5.24923	OK
YDR208W	YDR208W	MSS4	IV:868223-870563	35.972	27.8112	44.1327	OK	41.989	32.6389	51.339	OK	27.7477	21.4552	34.0403	OK	33.0167	25.6235	40.4099	OK
YDR209C	YDR209C	-	IV:871035-871449	0.195681	0	0.969476	OK	0	0	0	OK	0	0	0	OK	0	0	0	OK
YDR210C-C	YDR210C-C	-	IV:878658-883927	2.48554	0.545772	4.42531	OK	1.99824	0	4.25528	OK	5.20639	0	10.8422	OK	4.00819	0.729648	7.28673	OK
YDR210C-D	YDR210C-D	-	IV:878658-883927	2.66144	1.83363	3.48925	OK	2.75939	1.87684	3.64195	OK	9.56161	7.04376	12.0795	OK	9.09685	6.89072	11.303	OK
YDR210W	YDR210W	-	IV:871035-871449	43.2504	24.3979	62.1028	OK	48.1753	28.5201	67.8306	OK	43.6363	25.3355	61.937	OK	57.103	35.5378	78.6681	OK
YDR210W-A	YDR210W-A	-	IV:872111-877425	0	0	0	OK	0	0	0	OK	0	0	0	OK	0	0	0	OK
YDR210W-B	YDR210W-B	-	IV:872111-877425	4.03717	2.97967	5.09467	OK	3.99809	2.96773	5.02845	OK	10.5221	8.12637	12.9178	OK	9.14937	7.05179	11.2469	OK
YDR211W	YDR211W	GCD6	IV:884726-886865	103.739	80.1449	127.333	OK	42.3656	32.9412	51.7901	OK	90.7479	70.2618	111.234	OK	64.0192	49.7887	78.2497	OK
YDR212W	YDR212W	TCP1	IV:887231-888911	177.332	135.879	218.786	OK	138.304	106.832	169.777	OK	175.489	134.702	216.275	OK	148.098	114.155	182.041	OK
YDR213W	YDR213W	UPC2	IV:889750-892492	13.2094	10.0331	16.3857	OK	12.4425	9.46193	15.4231	OK	13.4431	10.2605	16.6258	OK	11.3027	8.56161	14.0437	OK
YDR214W	YDR214W	AHA1	IV:892874-893927	87.8132	68.2492	107.377	OK	101.879	79.1862	124.571	OK	152.867	118.813	186.921	OK	120.201	93.4709	146.932	OK
YDR215C	YDR215C	-	IV:894088-894502	0.784727	0	2.12043	OK	0.791827	0	2.12286	OK	0.617113	0	1.53913	OK	1.16126	0	2.74247	OK
YDR216W	YDR216W	ADR1	IV:895034-899006	19.1027	14.7228	23.4826	OK	16.9126	13.091	20.7343	OK	24.1843	18.7921	29.5765	OK	26.0845	20.2898	31.8792	OK
YDR217C	YDR217C	RAD9	IV:899550-903480	14.2819	10.9923	17.5715	OK	10.7793	8.26162	13.2971	OK	11.2648	8.65974	13.8699	OK	9.9135	7.58234	12.2447	OK
YDR218C	YDR218C	SPR28	IV:903780-905052	0.498178	0	1.01878	OK	0.978708	0.274314	1.6831	OK	1.86724	0.877126	2.85735	OK	1.67777	0.758622	2.59691	OK
YDR219C	YDR219C	MFB1	IV:905454-906852	25.9758	19.7489	32.2027	OK	28.6409	21.8749	35.4068	OK	18.109	13.5221	22.6959	OK	21.4814	16.1866	26.7761	OK
YDR220C	YDR220C	-	IV:906999-907293	0.357407	0	1.62105	OK	0.589874	0	1.84596	OK	0	0	0	OK	0.549056	0	1.6322	OK
YDR221W	YDR221W	GTB1	IV:907329-909438	81.5252	63.2249	99.8255	OK	85.2712	66.125	104.417	OK	77.6549	60.2675	95.0423	OK	71.8951	55.8613	87.929	OK
YDR222W	YDR222W	-	IV:910053-911301	63.9761	49.6228	78.3293	OK	30.0948	22.8948	37.2948	OK	30.9263	23.5721	38.2804	OK	8.78778	6.21072	11.3648	OK
YDR223W	YDR223W	CRF1	IV:912098-913502	2.34655	1.28932	3.40378	OK	3.58804	2.22523	4.95086	OK	4.89173	3.23563	6.54783	OK	5.35879	3.60012	7.11746	OK
YDR224C	YDR224C	HTB1	IV:914316-914712	156.872	119.662	194.083	OK	162.302	124.17	200.435	OK	141.821	108.149	175.493	OK	122.678	92.8431	152.512	OK
YDR225W	YDR225W	HTA1	IV:915529-915928	378.927	294.307	463.546	OK	322.044	250.141	393.948	OK	158.185	120.72	195.651	OK	136.175	103.561	168.79	OK
YDR226W	YDR226W	ADK1	IV:916485-917154	358.587	275.767	441.407	OK	370.706	286.591	454.821	OK	260.364	202.187	318.542	OK	261.63	203.374	319.885	OK
YDR227W	YDR227W	SIR4	IV:917570-921647	24.8384	19.1563	30.5205	OK	21.8728	16.9879	26.7576	OK	18.1831	14.1093	22.2569	OK	19.5627	15.2	23.9253	OK
YDR228C	YDR228C	PCF11	IV:921925-923806	18.3466	13.9073	22.7858	OK	9.37413	6.85875	11.8895	OK	13.6549	10.2265	17.0833	OK	8.26255	5.99082	10.5343	OK
YDR229W	YDR229W	IVY1	IV:924784-926146	31.5717	24.1651	38.9782	OK	34.4002	26.412	42.3884	OK	28.0393	21.35	34.7286	OK	32.9169	25.2499	40.5839	OK
YDR230W	YDR230W	-	IV:926222-926910	0.661829	0	2.49319	OK	0.336471	0	1.73269	OK	0.616587	0	2.58639	OK	0.577976	0	2.31981	OK
YDR231C	YDR231C	COX20	IV:926222-926910	22.8969	16.2007	29.593	OK	53.3187	39.9803	66.657	OK	38.2054	28.0333	48.3776	OK	69.3576	52.7268	85.9884	OK
YDR232W	YDR232W	HEM1	IV:927451-929098	65.3225	50.7497	79.8953	OK	42.0567	32.5866	51.5268	OK	52.2321	40.5665	63.8976	OK	39.118	30.2711	47.9649	OK
YDR233C	YDR233C	RTN1	IV:929469-930357	91.314	70.7045	111.924	OK	52.3398	39.8949	64.7846	OK	141.261	109.781	172.74	OK	67.5128	51.8565	83.1691	OK
YDR234W	YDR234W	LYS4	IV:931128-933210	65.3187	50.7924	79.845	OK	20.0689	15.379	24.7589	OK	49.7302	38.644	60.8163	OK	31.8129	24.6414	38.9845	OK
YDR235W	YDR235W	PRP42	IV:933503-935138	22.7771	17.3524	28.2017	OK	20.9109	15.8783	25.9435	OK	17.3576	13.0559	21.6594	OK	16.4443	12.3296	20.5591	OK
YDR236C	YDR236C	FMN1	IV:935235-935892	24.9588	17.8146	32.1031	OK	34.4521	25.2757	43.6286	OK	24.2561	17.3658	31.1463	OK	37.0735	27.4049	46.7421	OK
YDR237W	YDR237W	MRPL7	IV:936614-937493	37.3927	28.1991	46.5862	OK	46.6673	35.551	57.7836	OK	33.5049	25.1134	41.8964	OK	37.881	28.5912	47.1708	OK
YDR238C	YDR238C	SEC26	IV:937894-940816	152.85	115.47	190.23	OK	171.724	129.412	214.035	OK	129.105	98.3177	159.892	OK	118.419	90.3345	146.503	OK
YDR239C	YDR239C	-	IV:941056-943420	27.4629	21.2495	33.6763	OK	14.2291	10.8124	17.6459	OK	20.1934	15.5443	24.8425	OK	15.7132	11.9948	19.4315	OK
YDR240C	YDR240C	SNU56	IV:943673-945438	20.4043	15.3656	25.4429	OK	12.7287	9.32429	16.1331	OK	15.7234	11.6836	19.7632	OK	12.8246	9.35525	16.294	OK
YDR241W	YDR241W	BUD26	IV:943673-945438	1.36709	0	4.56142	OK	0.828293	0	3.06967	OK	1.42437	0	4.46041	OK	3.88829	0	12.3675	OK
YDR242W	YDR242W	AMD2	IV:946806-948456	18.6567	14.0955	23.2179	OK	199.534	152.701	246.367	OK	35.2635	27.2283	43.2987	OK	183.126	140.522	225.73	OK
YDR243C	YDR243C	PRP28	IV:948517-950284	32.2102	24.8431	39.5774	OK	17.8146	13.483	22.1462	OK	24.6452	18.906	30.3844	OK	21.3209	16.2681	26.3737	OK
YDR244W	YDR244W	PEX5	IV:950562-952401	26.4079	20.3149	32.501	OK	30.952	23.894	38.0099	OK	27.4459	21.1414	33.7504	OK	29.6167	22.8285	36.405	OK
YDR245W	YDR245W	MNN10	IV:952799-953981	154.173	119.338	189.008	OK	84.321	65.5149	103.127	OK	103.711	80.5533	126.869	OK	67.9608	52.7042	83.2174	OK
YDR246W	YDR246W	TRS23	IV:954287-954947	22.8583	16.2604	29.4562	OK	27.3214	19.7541	34.8887	OK	23.073	16.3862	29.7598	OK	30.1955	21.9923	38.3988	OK
YDR246W-A	YDR246W-A	-	IV:955132-955333	2.89886	0	6.19363	OK	1.87629	0	4.17644	OK	0	0	0	OK	1.97972	0	4.56719	OK
YDR247W	YDR247W	VHS1	IV:956012-957398	19.7014	14.755	24.6478	OK	15.9896	11.815	20.1641	OK	28.6479	21.8154	35.4803	OK	25.299	19.1951	31.403	OK
YDR248C	YDR248C	-	IV:957757-958339	21.5003	15.0612	27.9394	OK	51.5905	38.4465	64.7344	OK	33.8976	24.5686	43.2267	OK	54.1624	40.5267	67.7982	OK
YDR249C	YDR249C	-	IV:958680-959802	14.007	10.104	17.91	OK	7.34117	4.97209	9.71025	OK	13.5578	9.77091	17.3447	OK	13.2644	9.54549	16.9833	OK
YDR250C	YDR250C	-	IV:960085-960361	0.426577	0	1.81895	OK	0	0	0	OK	0.965154	0	2.44438	OK	0	0	0	OK
YDR251W	YDR251W	PAM1	IV:960613-963106	48.4208	37.6114	59.2301	OK	58.9577	45.8077	72.1078	OK	46.0754	35.8166	56.3342	OK	50.7949	39.494	62.0958	OK
YDR252W	YDR252W	BTT1	IV:963411-963861	22.3345	14.9017	29.7673	OK	18.1254	11.6417	24.609	OK	18.997	12.3617	25.6322	OK	18.7289	12.1201	25.3377	OK
YDR253C	YDR253C	MET32	IV:963989-964565	5.31814	2.57071	8.06557	OK	3.25638	1.11706	5.3957	OK	7.4665	4.18194	10.7511	OK	4.15902	1.77926	6.53877	OK
YDR254W	YDR254W	CHL4	IV:965112-966489	22.5723	17.0443	28.1004	OK	20.6645	15.5321	25.797	OK	20.3516	15.2769	25.4263	OK	22.5111	17.0025	28.0197	OK
YDR255C	YDR255C	RMD5	IV:966556-967822	19.7677	14.7379	24.7975	OK	39.1227	30.063	48.1824	OK	30.9123	23.5603	38.2644	OK	42.0367	32.3793	51.6941	OK
YDR256C	YDR256C	CTA1	IV:968132-969680	3.09045	1.91192	4.26897	OK	2.68141	1.60429	3.75853	OK	2.06465	1.12743	3.00187	OK	2.10676	1.15723	3.0563	OK
YDR257C	YDR257C	RKM4	IV:969989-971474	23.0625	17.5059	28.6191	OK	13.1514	9.67924	16.6236	OK	18.5752	13.9337	23.2166	OK	16.1838	12.0619	20.3057	OK
YDR258C	YDR258C	HSP78	IV:971807-974243	53.6603	41.7162	65.6044	OK	230.301	172.833	287.768	OK	185.955	140.693	231.216	OK	213.298	160.735	265.862	OK
YDR259C	YDR259C	YAP6	IV:974630-975782	2.64109	1.37965	3.90254	OK	2.64883	1.38841	3.90925	OK	3.44549	1.96667	4.92431	OK	3.95948	2.3921	5.52686	OK
YDR260C	YDR260C	SWM1	IV:976716-977229	20.2313	13.7062	26.7563	OK	18.0092	11.9715	24.0469	OK	24.4736	17.0697	31.8775	OK	22.5479	15.5941	29.5017	OK
YDR261C	YDR261C	EXG2	IV:977520-979209	56.0159	43.5508	68.4811	OK	51.0168	39.647	62.3866	OK	66.0108	51.3247	80.697	OK	60.6028	47.128	74.0775	OK
YDR261C-C	YDR261C-C	-	IV:987533-992349	0	0	0	OK	0	0	0	OK	0	0	0	OK	0	0	0	OK
YDR261C-D	YDR261C-D	-	IV:987533-992349	2.35295	1.67262	3.03327	OK	2.66559	1.91058	3.42061	OK	8.08207	6.18228	9.98186	OK	6.5631	4.98223	8.14397	OK
YDR261W-A	YDR261W-A	-	IV:981461-986775	3.33721	0.473596	6.20082	OK	3.56246	0.522948	6.60197	OK	17.4908	8.70548	26.2761	OK	11.688	5.46413	17.9119	OK
YDR261W-B	YDR261W-B	-	IV:981461-986775	3.26127	2.21405	4.30849	OK	3.5705	2.46312	4.67787	OK	14.9681	11.21	18.7262	OK	11.24	8.42379	14.0562	OK
YDR262W	YDR262W	-	IV:993133-993952	38.1542	28.545	47.7635	OK	41.8291	31.587	52.0712	OK	49.3376	37.5549	61.1203	OK	58.2684	44.658	71.8787	OK
YDR263C	YDR263C	DIN7	IV:994241-995534	14.3572	10.5112	18.2032	OK	9.12326	6.47038	11.7761	OK	15.5649	11.4681	19.6618	OK	12.0434	8.69429	15.3925	OK
YDR264C	YDR264C	AKR1	IV:996028-998323	141.117	107.963	174.272	OK	169.023	128.531	209.516	OK	147.342	112.492	182.192	OK	158.299	120.65	195.949	OK
YDR265W	YDR265W	PEX10	IV:998863-999877	13.2714	9.4292	17.1136	OK	17.4091	12.6176	22.2005	OK	12.551	8.93008	16.1719	OK	17.4187	12.6517	22.1857	OK
YDR266C	YDR266C	-	IV:1000103-1002023	23.5473	18.0256	29.0689	OK	11.6917	8.69286	14.6905	OK	14.0818	10.5811	17.5825	OK	8.34176	6.07052	10.613	OK
YDR267C	YDR267C	CIA1	IV:1002509-1003502	17.3822	12.6182	22.1462	OK	12.2235	8.64308	15.8039	OK	11.3806	8.03655	14.7247	OK	10.354	7.22166	13.4862	OK
YDR268W	YDR268W	MSW1	IV:1004003-1005143	19.7302	14.6166	24.8438	OK	22.8423	17.0603	28.6243	OK	17.569	12.9318	22.2062	OK	22.0866	16.4723	27.7008	OK
YDR269C	YDR269C	-	IV:1005664-1008766	1.19973	0	6.47417	OK	0.612518	0	3.68458	OK	0.351126	0	2.07955	OK	0.455106	0	2.58759	OK
YDR270W	YDR270W	CCC2	IV:1005664-1008766	24.6752	19.1328	30.2176	OK	27.5312	21.3829	33.6795	OK	21.7991	16.8831	26.7151	OK	22.8429	17.6995	27.9863	OK
YDR271C	YDR271C	-	IV:1005664-1008766	0.58206	0	3.11803	OK	1.16169	0	5.81343	OK	0	0	0	OK	0	0	0	OK
YDR272W	YDR272W	GLO2	IV:1009009-1009834	61.9726	47.5581	76.3872	OK	128.643	99.9283	157.358	OK	85.9859	66.4961	105.476	OK	147.159	114.467	179.852	OK
YDR273W	YDR273W	DON1	IV:1010175-1011273	7.30414	4.92493	9.68335	OK	3.77171	2.21334	5.33009	OK	6.31835	4.15186	8.48484	OK	4.96672	3.10742	6.82602	OK
YDR274C	YDR274C	-	IV:1011588-1011960	0.114932	0	0.856248	OK	0.53328	0	1.79578	OK	0.738087	0	1.78123	OK	0	0	0	OK
YDR275W	YDR275W	BSC2	IV:1012251-1012959	84.7443	65.1645	104.324	OK	67.2177	51.39	83.0453	OK	72.6878	55.7582	89.6174	OK	73.835	56.6431	91.027	OK
YDR276C	YDR276C	PMP3	IV:1013475-1013643	131.459	78.058	184.859	OK	191.448	124.709	258.186	OK	153.108	95.8432	210.372	OK	151.162	94.9483	207.375	OK
YDR277C	YDR277C	MTH1	IV:1014400-1015702	2.82964	1.61221	4.04706	OK	2.88762	1.66007	4.11517	OK	9.27359	6.56991	11.9773	OK	8.15623	5.73806	10.5744	OK
YDR278C	YDR278C	-	IV:1017000-1017318	3.39318	0	7.10984	OK	1.3302	0	3.46186	OK	1.92223	0	4.43692	OK	4.66344	0.584027	8.74285	OK
YDR279W	YDR279W	RNH202	IV:1019367-1020420	30.0086	22.627	37.3902	OK	26.7529	20.0396	33.4661	OK	22.3018	16.5454	28.0582	OK	19.8733	14.6584	25.0883	OK
YDR280W	YDR280W	RRP45	IV:1020746-1021664	56.4482	43.3185	69.5779	OK	24.5832	18.17	30.9964	OK	32.8875	24.6721	41.1029	OK	22.7015	16.7113	28.6918	OK
YDR281C	YDR281C	PHM6	IV:1022006-1022321	15.8014	8.07134	23.5314	OK	4.57772	0.515043	8.64039	OK	5.47714	1.04206	9.91222	OK	3.52296	0	7.11999	OK
YDR282C	YDR282C	-	IV:1023510-1024755	19.5483	14.5567	24.5399	OK	26.6032	20.1271	33.0793	OK	24.4903	18.4639	30.5167	OK	31.5494	24.0666	39.0321	OK
YDR283C	YDR283C	GCN2	IV:1025069-1030049	53.2817	40.7977	65.7657	OK	44.2231	34.0654	54.3808	OK	48.4926	37.3312	59.6541	OK	47.0127	36.2786	57.7468	OK
YDR284C	YDR284C	DPP1	IV:1030549-1031419	59.1917	45.2391	73.1443	OK	87.781	67.987	107.575	OK	61.735	47.434	76.036	OK	73.1673	56.5077	89.8269	OK
YDR285W	YDR285W	ZIP1	IV:1032435-1035063	6.92456	5.08509	8.76403	OK	8.31374	6.17046	10.457	OK	6.57715	4.81903	8.33528	OK	8.64997	6.44476	10.8552	OK
YDR286C	YDR286C	-	IV:1035230-1035575	10.9994	5.04862	16.9501	OK	14.7572	7.92257	21.5918	OK	10.038	4.59388	15.482	OK	11.596	5.64126	17.5508	OK
YDR287W	YDR287W	INM2	IV:1035994-1036873	13.7454	9.72109	17.7697	OK	28.5114	21.179	35.8438	OK	16.4758	11.7539	21.1977	OK	26.9567	19.9885	33.925	OK
YDR288W	YDR288W	NSE3	IV:1037194-1038106	41.2334	31.3161	51.1508	OK	33.0278	24.7914	41.2642	OK	32.8822	24.7019	41.0626	OK	31.157	23.2982	39.0159	OK
YDR289C	YDR289C	RTT103	IV:1038279-1039699	30.4624	23.1854	37.7395	OK	29.508	22.43	36.586	OK	32.5954	24.8616	40.3293	OK	30.9033	23.5115	38.2951	OK
YDR290W	YDR290W	-	IV:1038279-1039699	0	0	0	OK	0	0	0	OK	0	0	0	OK	0	0	0	OK
YDR291W	YDR291W	HRQ1	IV:1039727-1042961	29.5546	22.948	36.1612	OK	21.3669	16.5521	26.1818	OK	21.0514	16.3047	25.7982	OK	17.1007	13.2085	20.993	OK
YDR292C	YDR292C	SRP101	IV:1043145-1045011	101.874	78.9592	124.79	OK	85.7567	66.5901	104.923	OK	67.6873	52.5828	82.7919	OK	61.1755	47.5229	74.8281	OK
YDR293C	YDR293C	SSD1	IV:1045639-1049392	63.3881	48.2469	78.5292	OK	84.7694	64.6359	104.903	OK	76.3257	58.5388	94.1126	OK	97.6391	74.3485	120.93	OK
YDR294C	YDR294C	DPL1	IV:1050458-1052228	114.828	88.921	140.734	OK	106.529	82.612	130.447	OK	139.751	107.788	171.714	OK	123.729	95.6727	151.785	OK
YDR295C	YDR295C	HDA2	IV:1052622-1054647	23.911	18.3722	29.4497	OK	23.1647	17.8132	28.5161	OK	26.0529	20.0889	32.0169	OK	26.2092	20.2145	32.2039	OK
YDR296W	YDR296W	MHR1	IV:1055211-1055892	38.5607	28.5969	48.5245	OK	59.8671	45.3982	74.336	OK	37.3479	27.6214	47.0744	OK	47.9323	36.0216	59.843	OK
YDR297W	YDR297W	SUR2	IV:1056550-1057600	72.1992	55.9152	88.4833	OK	38.7654	29.5441	47.9866	OK	68.1517	52.7798	83.5236	OK	37.2965	28.423	46.17	OK
YDR298C	YDR298C	ATP5	IV:1058175-1058814	78.1124	59.5817	96.6432	OK	115.284	88.986	141.582	OK	94.3625	72.6591	116.066	OK	123.034	95.2293	150.838	OK
YDR299W	YDR299W	BFR2	IV:1059626-1061231	42.1663	32.5644	51.7682	OK	1.59739	0.797495	2.39729	OK	18.4394	13.8716	23.0072	OK	4.66821	3.14494	6.19148	OK
YDR300C	YDR300C	PRO1	IV:1061504-1062791	54.5113	42.1322	66.8903	OK	17.5347	13.0016	22.0678	OK	34.2847	26.2771	42.2923	OK	16.6587	12.3291	20.9883	OK
YDR301W	YDR301W	CFT1	IV:1063351-1067425	51.8844	39.9696	63.7991	OK	46.3531	35.8353	56.871	OK	41.9787	32.5472	51.4102	OK	41.1984	31.9471	50.4497	OK
YDR302W	YDR302W	GPI11	IV:1067730-1068390	39.127	28.5888	49.6652	OK	23.0122	16.3249	29.6995	OK	20.4294	14.4859	26.3729	OK	19.156	13.5484	24.7636	OK
YDR303C	YDR303C	RSC3	IV:1068728-1071386	25.5437	19.7444	31.343	OK	22.301	17.2278	27.3742	OK	14.1626	10.8038	17.5214	OK	12.912	9.82222	16.0019	OK
YDR304C	YDR304C	CPR5	IV:1071879-1072557	241.73	185.771	297.689	OK	288.005	223.323	352.687	OK	259.741	201.676	317.806	OK	300.18	232.841	367.518	OK
YDR305C	YDR305C	HNT2	IV:1072745-1073488	19.7792	13.9224	25.636	OK	22.3694	15.8703	28.8686	OK	21.0872	14.9608	27.2136	OK	25.7972	18.5763	33.0182	OK
YDR306C	YDR306C	-	IV:1073734-1075171	23.8014	18.0618	29.541	OK	34.2588	26.3301	42.1875	OK	26.2877	20.0121	32.5633	OK	36.3421	27.9969	44.6874	OK
YDR307W	YDR307W	-	IV:1075864-1077853	30.2539	23.3884	37.1195	OK	39.1055	30.3454	47.8657	OK	38.7744	30.0864	47.4624	OK	40.0148	31.0598	48.9699	OK
YDR308C	YDR308C	SRB7	IV:1078026-1078449	35.7394	24.8741	46.6047	OK	36.8541	26.0634	47.6449	OK	29.6269	20.3332	38.9206	OK	28.8578	19.8173	37.8983	OK
YDR309C	YDR309C	GIC2	IV:1079047-1080199	8.59413	5.96958	11.2187	OK	12.3534	8.8184	15.8884	OK	18.6693	13.7294	23.6091	OK	18.9153	13.9252	23.9055	OK
YDR310C	YDR310C	SUM1	IV:1081127-1084316	43.0377	33.1801	52.8953	OK	24.9173	19.3305	30.5041	OK	25.0207	19.4307	30.6106	OK	20.4391	15.8215	25.0568	OK
YDR311W	YDR311W	TFB1	IV:1085064-1086993	42.93	33.3303	52.5296	OK	35.2518	27.3088	43.1948	OK	31.7525	24.554	38.9511	OK	29.408	22.7112	36.1048	OK
YDR312W	YDR312W	SSF2	IV:1087580-1088942	31.8011	24.3556	39.2467	OK	13.7698	10.1004	17.4391	OK	31.3546	24.0127	38.6964	OK	20.793	15.6196	25.9665	OK
YDR313C	YDR313C	PIB1	IV:1089218-1090079	21.8127	15.8962	27.7292	OK	33.8298	25.3524	42.3072	OK	23.9231	17.5677	30.2786	OK	39.2952	29.6865	48.904	OK
YDR314C	YDR314C	RAD34	IV:1090432-1092511	66.7973	51.8716	81.723	OK	84.2745	65.296	103.253	OK	55.9965	43.5382	68.4547	OK	75.2945	58.4657	92.1233	OK
YDR315C	YDR315C	IPK1	IV:1092740-1093586	12.9176	9.02296	16.8122	OK	21.8342	15.8955	27.773	OK	15.374	10.9372	19.8108	OK	20.5842	14.9364	26.2319	OK
YDR316W	YDR316W	OMS1	IV:1093762-1095178	27.5404	21.0013	34.0794	OK	31.3736	24.0536	38.6937	OK	24.0397	18.2058	29.8736	OK	27.9023	21.3128	34.4917	OK
YDR316W-A	YDR316W-A	-	IV:1096063-1101332	0	0	0	OK	0	0	0	OK	0	0	0	OK	0	0	0	OK
YDR316W-B	YDR316W-B	-	IV:1096063-1101332	1.69641	1.18329	2.20953	OK	1.85993	1.31285	2.40702	OK	3.35244	2.46381	4.24107	OK	3.23645	2.37432	4.09858	OK
YDR317W	YDR317W	HIM1	IV:1102183-1103428	4.25964	2.66573	5.85354	OK	3.25895	1.89947	4.61843	OK	7.09261	4.87264	9.31258	OK	7.32652	5.04979	9.60326	OK
YDR318W	YDR318W	MCM21	IV:1103757-1104947	7.30821	4.93855	9.67788	OK	10.4501	7.4004	13.4997	OK	7.06412	4.75287	9.37538	OK	12.6731	9.04182	16.3043	OK
YDR319C	YDR319C	-	IV:1105002-1105827	35.4486	26.5124	44.3849	OK	39.8266	29.9949	49.6582	OK	36.2445	27.1122	45.3768	OK	49.3937	37.6268	61.1606	OK
YDR320C	YDR320C	SWA2	IV:1106094-1108101	10.4721	7.73907	13.2051	OK	8.98475	6.58982	11.3797	OK	11.3964	8.48227	14.3105	OK	9.51042	7.0036	12.0172	OK
YDR320C-A	YDR320C-A	DAD4	IV:1108279-1108621	119.997	82.5344	157.459	OK	83.233	54.0501	112.416	OK	84.9414	55.7286	114.154	OK	113.494	78.2247	148.763	OK
YDR320W-B	YDR320W-B	-	IV:1108279-1108621	8.8051	2.58387	15.0263	OK	2.5658	0.11213	5.01946	OK	10.9931	4.22135	17.7649	OK	0	0	0	OK
YDR321W	YDR321W	ASP1	IV:1108701-1109847	113.9	87.4206	140.379	OK	36.9047	28.1254	45.684	OK	90.1396	69.9732	110.306	OK	46.8038	36.022	57.5856	OK
YDR322C-A	YDR322C-A	TIM11	IV:1112002-1112293	125.647	91.583	159.712	OK	203.719	152.818	254.619	OK	124.003	91.0648	156.941	OK	225.306	171.103	279.509	OK
YDR322W	YDR322W	MRPL35	IV:1110588-1111692	12.9383	9.25008	16.6265	OK	17.1222	12.5261	21.7184	OK	12.9381	9.24521	16.6311	OK	14.301	10.34	18.262	OK
YDR323C	YDR323C	PEP7	IV:1112479-1114027	13.1268	9.6908	16.5627	OK	14.0748	10.4326	17.7171	OK	12.5081	9.20586	15.8103	OK	14.819	11.0054	18.6325	OK
YDR324C	YDR324C	UTP4	IV:1114432-1116763	94.8338	73.3176	116.35	OK	5.35235	3.82104	6.88367	OK	50.4091	39.174	61.6442	OK	8.62513	6.37185	10.8784	OK
YDR325W	YDR325W	YCG1	IV:1117125-1120233	48.4794	37.5936	59.3651	OK	30.3586	23.6029	37.1142	OK	34.464	26.8009	42.1272	OK	27.9096	21.6947	34.1244	OK
YDR326C	YDR326C	YSP2	IV:1120608-1124925	56.3693	43.1248	69.6137	OK	40.7825	31.5561	50.0089	OK	41.9073	32.4886	51.326	OK	33.6481	26.1098	41.1864	OK
YDR327W	YDR327W	-	IV:1125301-1126018	1.62509	0	6.80631	OK	1.21832	0	6.56218	OK	0.667632	0	3.44996	OK	1.94167	0	6.56385	OK
YDR328C	YDR328C	SKP1	IV:1125301-1126018	116.868	89.8257	143.911	OK	183.818	142.44	225.196	OK	129.117	99.7817	158.452	OK	194.106	150.809	237.404	OK
YDR329C	YDR329C	PEX3	IV:1126269-1127595	40.6199	31.307	49.9329	OK	47.8122	36.9597	58.6648	OK	45.6462	35.2643	56.028	OK	50.1082	38.7824	61.434	OK
YDR330W	YDR330W	UBX5	IV:1127871-1129374	17.4706	13.0854	21.8557	OK	36.5335	28.1612	44.9058	OK	25.3174	19.3064	31.3285	OK	36.7081	28.3178	45.0984	OK
YDR331W	YDR331W	GPI8	IV:1129587-1130823	71.4675	55.4773	87.4577	OK	56.5899	43.8313	69.3485	OK	60.2432	46.7026	73.7838	OK	48.6562	37.5797	59.7327	OK
YDR332W	YDR332W	IRC3	IV:1131000-1133070	16.7547	12.7421	20.7674	OK	14.0858	10.6254	17.5463	OK	13.9384	10.51	17.3668	OK	12.423	9.31346	15.5325	OK
YDR333C	YDR333C	-	IV:1133259-1135431	45.3374	35.2388	55.436	OK	25.6687	19.8109	31.5266	OK	34.5101	26.7693	42.251	OK	28.3373	21.9159	34.7586	OK
YDR334W	YDR334W	SWR1	IV:1135931-1140476	92.2479	69.4762	115.02	OK	76.8771	58.478	95.2762	OK	78.6968	59.9382	97.4554	OK	58.6324	45.0627	72.2021	OK
YDR335W	YDR335W	MSN5	IV:1141167-1144842	95.8577	72.9632	118.752	OK	105.137	79.7517	130.521	OK	105.258	79.9711	130.544	OK	105.321	79.9914	130.651	OK
YDR336W	YDR336W	-	IV:1145091-1146036	25.9659	19.2468	32.685	OK	17.0258	12.2796	21.7721	OK	16.2301	11.6711	20.7891	OK	14.5941	10.3775	18.8106	OK
YDR337W	YDR337W	MRPS28	IV:1146318-1147179	26.5866	19.6239	33.5493	OK	30.9679	23.0831	38.8527	OK	17.8737	12.8241	22.9234	OK	26.6979	19.7413	33.6545	OK
YDR338C	YDR338C	-	IV:1147378-1149466	25.1119	19.3626	30.8612	OK	23.8571	18.3766	29.3377	OK	22.3314	17.1677	27.4951	OK	21.5401	16.5386	26.5416	OK
YDR339C	YDR339C	FCF1	IV:1149950-1150520	38.7584	28.3261	49.1907	OK	14.0376	9.18315	18.892	OK	25.2261	17.829	32.6232	OK	14.3742	9.4461	19.3024	OK
YDR340W	YDR340W	-	IV:1150841-1151183	0.360293	0	1.3052	OK	0.210528	0	1.15558	OK	0.399134	0	1.33468	OK	0	0	0	OK
YDR341C	YDR341C	-	IV:1151802-1153626	200.122	152.569	247.675	OK	105.745	81.9825	129.508	OK	163.759	125.65	201.867	OK	107.064	82.8071	131.321	OK
YDR342C	YDR342C	HXT7	IV:1154215-1155928	3.45574	2.23053	4.68094	OK	3.87571	2.56031	5.19111	OK	12.3646	9.14589	15.5833	OK	11.7258	8.65482	14.7967	OK
YDR343C	YDR343C	HXT6	IV:1159607-1161320	1.04715	0.420567	1.67373	OK	0.994298	0.38674	1.60186	OK	1.89951	1.05591	2.74312	OK	1.60378	0.831875	2.37568	OK
YDR344C	YDR344C	-	IV:1162005-1162449	22.8507	15.2587	30.4427	OK	9.40334	4.95322	13.8535	OK	12.5146	7.38471	17.6445	OK	5.14381	1.97531	8.3123	OK
YDR345C	YDR345C	HXT3	IV:1162956-1164660	460.801	340.633	580.969	OK	340.387	255.535	425.239	OK	426.129	316.524	535.734	OK	330.838	248.775	412.901	OK
YDR346C	YDR346C	SVF1	IV:1167213-1168659	158.718	122.716	194.719	OK	100.801	78.396	123.207	OK	138.465	107.369	169.561	OK	118.759	92.141	145.378	OK
YDR347W	YDR347W	MRP1	IV:1169177-1170143	35.1477	26.4923	43.803	OK	44.7899	34.2161	55.3637	OK	33.1356	24.9711	41.3	OK	39.3843	29.9498	48.8188	OK
YDR348C	YDR348C	-	IV:1170325-1171825	47.931	37.1309	58.7311	OK	49.5107	38.3943	60.6271	OK	37.5157	28.9455	46.0858	OK	35.3839	27.2755	43.4923	OK
YDR349C	YDR349C	YPS7	IV:1172385-1174176	74.9973	58.3131	91.6815	OK	58.05	45.1478	70.9523	OK	95.5897	74.1233	117.056	OK	80.9153	62.933	98.8976	OK
YDR350C	YDR350C	ATP22	IV:1176119-1178174	27.5385	21.2609	33.8161	OK	33.2745	25.7903	40.7587	OK	27.551	21.2776	33.8244	OK	33.6916	26.1193	41.2639	OK
YDR351W	YDR351W	SBE2	IV:1178665-1181260	38.9767	30.2273	47.726	OK	33.9962	26.3941	41.5983	OK	36.6428	28.4924	44.7932	OK	37.9658	29.5266	46.405	OK
YDR352W	YDR352W	-	IV:1181800-1182754	51.6291	39.6172	63.641	OK	54.0519	41.5344	66.5694	OK	38.6817	29.3725	47.9908	OK	39.2175	29.7737	48.6613	OK
YDR353W	YDR353W	TRR1	IV:1183298-1184258	184.78	143.314	226.246	OK	328.827	252.545	405.108	OK	176.805	137.335	216.275	OK	268.279	207.098	329.46	OK
YDR354C-A	YDR354C-A	-	IV:1184746-1185889	6.76521	0	14.9428	OK	0	0	0	OK	0	0	0	OK	0	0	0	OK
YDR354W	YDR354W	TRP4	IV:1184746-1185889	36.6435	27.9092	45.3778	OK	64.035	49.5877	78.4823	OK	40.0047	30.6757	49.3338	OK	55.838	43.133	68.543	OK
YDR355C	YDR355C	-	IV:1186066-1188941	0.346141	0	3.04569	OK	0	0	0	OK	0	0	0	OK	0	0	0	OK
YDR356W	YDR356W	SPC110	IV:1186066-1188941	37.6287	29.0967	46.1607	OK	48.2007	37.3962	59.0052	OK	28.6526	22.2477	35.0575	OK	30.7538	23.9156	37.592	OK
YDR357C	YDR357C	CNL1	IV:1189198-1189567	32.4704	21.7479	43.1928	OK	31.5439	21.0556	42.0321	OK	45.926	32.1076	59.7443	OK	70.6957	51.4465	89.945	OK
YDR358W	YDR358W	GGA1	IV:1190058-1191732	18.9808	14.3667	23.5949	OK	53.8965	41.91	65.8831	OK	34.5104	26.6527	42.368	OK	56.5794	43.996	69.1628	OK
YDR359C	YDR359C	EAF1	IV:1191935-1195032	34.6574	26.8352	42.4797	OK	22.384	17.3367	27.4313	OK	23.8517	18.477	29.2264	OK	19.7291	15.2369	24.2214	OK
YDR360W	YDR360W	OPI7	IV:1191935-1195032	0.0883768	0	0.963508	OK	0	0	0	OK	0.425682	0	2.16429	OK	0.675159	0	3.34549	OK
YDR361C	YDR361C	BCP1	IV:1195411-1196263	86.7177	67.0774	106.358	OK	20.84	15.0803	26.5997	OK	51.2528	39.1445	63.361	OK	26.5535	19.6297	33.4773	OK
YDR362C	YDR362C	TFC6	IV:1196678-1198697	20.6329	15.8031	25.4626	OK	17.2176	13.0943	21.3408	OK	17.3596	13.205	21.5143	OK	13.7497	10.3471	17.1523	OK
YDR363W	YDR363W	ESC2	IV:1199182-1200553	21.166	15.8951	26.4368	OK	16.6287	12.3442	20.9132	OK	19.049	14.253	23.8449	OK	18.1858	13.5457	22.8259	OK
YDR363W-A	YDR363W-A	SEM1	IV:1202127-1202397	145.34	106.274	184.406	OK	256.137	193.497	318.776	OK	150.855	111.153	190.557	OK	256.481	194.383	318.579	OK
YDR364C	YDR364C	CDC40	IV:1202842-1204210	35.848	27.553	44.143	OK	18.547	13.8565	23.2375	OK	24.9664	18.9198	31.013	OK	18.5231	13.8392	23.207	OK
YDR365C	YDR365C	ESF1	IV:1204496-1206383	205.891	156.423	255.36	OK	140.408	108.003	172.812	OK	176.646	135.046	218.246	OK	146.959	112.977	180.941	OK
YDR365W-A	YDR365W-A	-	IV:1206996-1212265	0	0	0	OK	0	0	0	OK	0	0	0	OK	0	0	0	OK
YDR365W-B	YDR365W-B	-	IV:1206996-1212265	4.54978	3.39044	5.70913	OK	4.82407	3.62	6.02814	OK	17.3898	13.51	21.2695	OK	13.767	10.6517	16.8824	OK
YDR366C	YDR366C	-	IV:1212437-1212836	0.409663	0	1.41405	OK	0	0	0	OK	0.32778	0	1.00797	OK	0.316879	0	1.04951	OK
YDR367W	YDR367W	KEI1	IV:1212847-1213614	47.3553	35.3848	59.3258	OK	35.2759	25.9286	44.6233	OK	39.666	29.4197	49.9123	OK	29.6541	21.5368	37.7714	OK
YDR368W	YDR368W	YPR1	IV:1213903-1214842	27.7606	20.6109	34.9104	OK	53.3669	40.9625	65.7713	OK	29.5584	22.1159	37.0009	OK	45.2648	34.5808	55.9489	OK
YDR369C	YDR369C	XRS2	IV:1215015-1217580	23.1207	17.8757	28.3657	OK	23.9834	18.543	29.4239	OK	24.0675	18.6223	29.5127	OK	26.0875	20.2147	31.9604	OK
YDR370C	YDR370C	-	IV:1217781-1219110	19.7306	14.7304	24.7309	OK	12.1702	8.8267	15.5136	OK	15.2657	11.2493	19.282	OK	12.1976	8.85872	15.5364	OK
YDR371C-A	YDR371C-A	-	IV:1219412-1220948	0	0	0	OK	0	0	0	OK	0	0	0	OK	0	0	0	OK
YDR371W	YDR371W	CTS2	IV:1219412-1220948	23.0761	17.537	28.6152	OK	31.9122	24.5499	39.2745	OK	39.6829	30.6722	48.6936	OK	42.5188	32.8661	52.1716	OK
YDR372C	YDR372C	VPS74	IV:1221111-1222149	73.3616	56.7286	89.9945	OK	73.5792	56.9812	90.1773	OK	67.3187	52.0942	82.5432	OK	61.9568	47.8637	76.0498	OK
YDR373W	YDR373W	FRQ1	IV:1222758-1223331	58.5829	43.6675	73.4983	OK	88.3766	67.5544	109.199	OK	61.5785	46.2705	76.8865	OK	79.6036	60.646	98.5611	OK
YDR374C	YDR374C	-	IV:1223473-1224394	0.606588	0	1.30264	OK	1.42282	0.391509	2.45413	OK	3.05541	1.54154	4.56929	OK	5.33446	3.27027	7.39866	OK
YDR374W-A	YDR374W-A	-	IV:1224756-1225026	25.9304	14.0108	37.8499	OK	43.9273	27.5969	60.2577	OK	42.1726	26.6077	57.7375	OK	58.8753	39.4235	78.327	OK
YDR375C	YDR375C	BCS1	IV:1225165-1226536	17.2969	12.8698	21.724	OK	16.6578	12.3556	20.96	OK	14.9193	11.0034	18.8352	OK	14.0287	10.3134	17.744	OK
YDR376W	YDR376W	ARH1	IV:1226821-1228303	25.33	19.267	31.393	OK	29.6946	22.762	36.6273	OK	27.9882	21.4189	34.5574	OK	32.7558	25.1958	40.3157	OK
YDR377W	YDR377W	ATP17	IV:1228610-1228916	67.3771	46.9116	87.8425	OK	117.302	85.9724	148.633	OK	88.9074	64.1829	113.632	OK	147.918	110.521	185.314	OK
YDR378C	YDR378C	LSM6	IV:1229348-1229609	151.024	108.263	193.784	OK	128.646	92.4815	164.811	OK	89.8349	63.5828	116.087	OK	117.411	84.3379	150.484	OK
YDR379C-A	YDR379C-A	-	IV:1233277-1233517	12.4202	3.02522	21.8151	OK	62.519	40.281	84.7571	OK	20.2161	8.66986	31.7623	OK	78.5373	53.2519	103.823	OK
YDR379W	YDR379W	RGA2	IV:1230166-1233196	16.3786	12.5349	20.2223	OK	27.7205	21.4941	33.9468	OK	15.3128	11.7786	18.847	OK	21.8519	16.9335	26.7702	OK
YDR380W	YDR380W	ARO10	IV:1234217-1236125	16.3455	12.3625	20.3286	OK	174.964	133.768	216.159	OK	11.2241	8.32332	14.1249	OK	81.1745	63.0614	99.2877	OK
YDR381C-A	YDR381C-A	-	IV:1238311-1238850	75.2245	54.4071	96.042	OK	80.2947	58.3371	102.252	OK	91.8109	67.5605	116.061	OK	109.247	81.2619	137.233	OK
YDR381W	YDR381W	YRA1	IV:1236557-1238004	289.178	224.101	354.254	OK	268.533	208.445	328.621	OK	202.79	157.476	248.105	OK	203.122	157.933	248.311	OK
YDR382W	YDR382W	RPP2B	IV:1239491-1239824	1149.21	883.238	1415.18	OK	540.748	420.087	661.409	OK	777.861	604.637	951.086	OK	416.799	323.299	510.299	OK
YDR383C	YDR383C	NKP1	IV:1239959-1240676	16.9487	11.9323	21.9651	OK	23.6099	16.9996	30.2203	OK	15.1576	10.4084	19.9069	OK	20.8553	14.9378	26.7727	OK
YDR384C	YDR384C	ATO3	IV:1241203-1242031	37.265	27.9404	46.5895	OK	7.02616	4.42075	9.63157	OK	33.8984	25.3015	42.4954	OK	13.6998	9.64423	17.7553	OK
YDR385W	YDR385W	EFT2	IV:1243229-1245758	290.583	215.297	365.869	OK	162.482	123.298	201.667	OK	174.138	131.713	216.564	OK	97.697	75.2421	120.152	OK
YDR386W	YDR386W	MUS81	IV:1246083-1247982	11.8101	8.76151	14.8588	OK	18.7566	14.2715	23.2416	OK	12.2033	9.09078	15.3158	OK	17.3707	13.182	21.5594	OK
YDR387C	YDR387C	-	IV:1248153-1249821	24.0029	18.3227	29.683	OK	38.76	29.9621	47.5579	OK	28.3334	21.7575	34.9094	OK	40.7933	31.6043	49.9823	OK
YDR388W	YDR388W	RVS167	IV:1250185-1251634	79.0915	61.5171	96.666	OK	126.957	98.4406	155.474	OK	75.0496	58.3481	91.7511	OK	105.783	82.2315	129.334	OK
YDR389W	YDR389W	SAC7	IV:1252536-1254501	40.9206	31.6033	50.2379	OK	39.2724	30.463	48.0819	OK	32.2284	24.9302	39.5267	OK	28.5702	22.044	35.0963	OK
YDR390C	YDR390C	UBA2	IV:1254936-1256847	26.7126	20.5666	32.8587	OK	18.4002	13.9972	22.8033	OK	25.4687	19.6029	31.3345	OK	21.2365	16.2547	26.2183	OK
YDR391C	YDR391C	-	IV:1257357-1258056	8.37561	5.19075	11.5605	OK	21.8714	15.6023	28.1405	OK	22.4718	16.0588	28.8849	OK	39.8103	29.6024	50.0182	OK
YDR392W	YDR392W	SPT3	IV:1258695-1259709	19.5845	14.355	24.814	OK	19.9373	14.6254	25.2492	OK	17.2411	12.5397	21.9426	OK	24.7474	18.414	31.0808	OK
YDR393W	YDR393W	SHE9	IV:1259900-1261271	33.1933	25.4684	40.9181	OK	37.2746	28.6967	45.8525	OK	22.9413	17.3326	28.55	OK	26.3396	20.034	32.6451	OK
YDR394W	YDR394W	RPT3	IV:1261680-1262967	98.6484	76.6985	120.598	OK	134.012	103.993	164.031	OK	137.999	107.047	168.951	OK	136.9	106.204	167.596	OK
YDR395W	YDR395W	SXM1	IV:1263323-1266158	107.239	82.1497	132.329	OK	31.6648	24.6154	38.7141	OK	68.5253	53.0764	83.9742	OK	32.276	25.0984	39.4536	OK
YDR396W	YDR396W	-	IV:1266294-1266898	4.74237	0.206017	9.27873	OK	1.1339	0	2.84624	OK	2.90982	0.0423181	5.77732	OK	0	0	0	OK
YDR397C	YDR397C	NCB2	IV:1266294-1266898	52.1446	37.1095	67.1796	OK	29.6783	20.4053	38.9513	OK	29.5125	20.0478	38.9771	OK	35.2423	25.0501	45.4345	OK
YDR398W	YDR398W	UTP5	IV:1267470-1269402	76.8243	59.7185	93.93	OK	6.57226	4.68549	8.45902	OK	37.5439	29.1016	45.9862	OK	13.308	9.96456	16.6514	OK
YDR399W	YDR399W	HPT1	IV:1270067-1270733	204.138	157.489	250.786	OK	29.2232	21.2026	37.2439	OK	91.4751	70.4102	112.54	OK	43.0334	32.1053	53.9614	OK
YDR400W	YDR400W	URH1	IV:1271062-1272085	14.9921	10.7842	19.2	OK	16.5267	11.9913	21.0622	OK	15.5218	11.1988	19.8448	OK	16.7234	12.1564	21.2904	OK
YDR401W	YDR401W	-	IV:1272222-1273703	3.04595	0.43153	5.66037	OK	1.17547	0	2.49236	OK	3.65617	0.321213	6.99113	OK	2.39202	0.290144	4.4939	OK
YDR402C	YDR402C	DIT2	IV:1272222-1273703	1.17044	0.336177	2.00471	OK	0.780126	0.182582	1.37767	OK	1.80153	0.621655	2.98141	OK	1.89375	0.907765	2.87973	OK
YDR403W	YDR403W	DIT1	IV:1274601-1276212	0.954564	0.345828	1.5633	OK	0.771466	0.232178	1.31075	OK	2.21134	1.25755	3.16513	OK	3.57294	2.28643	4.85946	OK
YDR404C	YDR404C	RPB7	IV:1276653-1277169	27.5966	19.5466	35.6466	OK	17.623	11.7121	23.5339	OK	17.2662	11.4665	23.0659	OK	19.3393	13.0956	25.583	OK
YDR405W	YDR405W	MRP20	IV:1277645-1278437	11.3543	7.71483	14.9937	OK	10.5017	7.04532	13.9581	OK	8.31517	5.36738	11.263	OK	9.71495	6.42455	13.0054	OK
YDR406W	YDR406W	PDR15	IV:1279209-1284044	26.9046	20.8997	32.9094	OK	42.7042	33.0401	52.3683	OK	26.0768	20.2636	31.89	OK	33.0058	25.6257	40.386	OK
YDR406W-A	YDR406W-A	-	IV:1279209-1284044	0.264621	0	2.37042	OK	0.589786	0	5.81818	OK	0.623054	0	3.56766	OK	0.80726	0	5.37675	OK
YDR407C	YDR407C	TRS120	IV:1284068-1287938	33.0461	25.6181	40.474	OK	35.5506	27.6267	43.4745	OK	29.1451	22.6252	35.6651	OK	29.2177	22.7179	35.7175	OK
YDR408C	YDR408C	ADE8	IV:1288214-1288859	63.7868	48.3003	79.2732	OK	45.6208	33.9718	57.2697	OK	33.1013	24.2245	41.9782	OK	38.9104	28.727	49.0938	OK
YDR409W	YDR409W	SIZ1	IV:1289405-1292120	8.96563	6.69492	11.2363	OK	8.2074	6.09858	10.3162	OK	7.15496	5.28594	9.02398	OK	7.42288	5.49245	9.35331	OK
YDR410C	YDR410C	STE14	IV:1292371-1293091	32.9854	24.1193	41.8514	OK	24.117	17.3807	30.8533	OK	23.1139	16.6351	29.5928	OK	27.1115	19.6427	34.5804	OK
YDR411C	YDR411C	DFM1	IV:1293368-1294394	49.6426	38.0025	61.2826	OK	41.5235	31.7091	51.3379	OK	45.2089	34.6121	55.8058	OK	51.3935	39.5637	63.2233	OK
YDR412W	YDR412W	RRP17	IV:1294692-1295411	63.7427	48.3244	79.1611	OK	9.47372	5.97951	12.9679	OK	36.0362	26.519	45.5534	OK	15.5193	10.788	20.2507	OK
YDR413C	YDR413C	-	IV:1294692-1295411	3.75215	0	8.73267	OK	0.821392	0	2.23103	OK	2.23479	0	5.78749	OK	0.631988	0	1.77177	OK
YDR414C	YDR414C	ERD1	IV:1295597-1296686	10.7468	7.6291	13.8645	OK	6.10823	3.9795	8.23697	OK	10.6065	7.47207	13.741	OK	4.82252	3.00346	6.64159	OK
YDR415C	YDR415C	-	IV:1297036-1298161	41.4215	31.7719	51.071	OK	42.8297	32.888	52.7713	OK	40.9267	31.3372	50.5161	OK	34.8953	26.591	43.1995	OK
YDR416W	YDR416W	SYF1	IV:1298431-1301011	45.6932	35.4944	55.8919	OK	29.1526	22.6087	35.6964	OK	30.9448	24.032	37.8576	OK	25.8632	20.0445	31.682	OK
YDR417C	YDR417C	-	IV:1301554-1302113	1.17138	0	6.23939	OK	0.905088	0	3.42798	OK	0.369043	0	2.0184	OK	0.870646	0	3.75148	OK
YDR418W	YDR418W	RPL12B	IV:1301554-1302113	271.605	210.932	332.277	OK	128.852	98.8607	158.843	OK	194.647	150.914	238.379	OK	88.7146	67.2009	110.228	OK
YDR419W	YDR419W	RAD30	IV:1303173-1305072	27.5338	21.2186	33.849	OK	26.9472	20.7659	33.1285	OK	24.412	18.7664	30.0576	OK	22.0497	16.8922	27.2073	OK
YDR420W	YDR420W	HKR1	IV:1306266-1311675	14.8995	11.5706	18.2283	OK	11.886	9.20252	14.5694	OK	19.727	15.3006	24.1535	OK	15.8808	12.3334	19.4282	OK
YDR421W	YDR421W	ARO80	IV:1312039-1314892	25.5533	19.8113	31.2954	OK	42.9186	33.3658	52.4714	OK	25.9034	20.093	31.7139	OK	37.3318	29.0376	45.626	OK
YDR422C	YDR422C	SIP1	IV:1315325-1317773	50.2803	39.0357	61.5249	OK	41.3254	32.1189	50.5318	OK	42.3967	32.9563	51.837	OK	37.3619	29.0097	45.7141	OK
YDR423C	YDR423C	CAD1	IV:1318045-1319275	38.7855	29.7926	47.7785	OK	53.9584	41.7098	66.207	OK	28.6605	21.7306	35.5905	OK	37.2937	28.6143	45.9731	OK
YDR424C	YDR424C	DYN2	IV:1319386-1319841	109.533	78.6316	140.434	OK	133.468	97.2704	169.666	OK	106.078	76.4312	135.726	OK	138.271	101.745	174.796	OK
YDR425W	YDR425W	SNX41	IV:1320063-1322006	2.12193	1.09265	3.15121	OK	3.75664	2.47615	5.03714	OK	4.17173	2.76932	5.57414	OK	6.04161	4.19592	7.88729	OK
YDR426C	YDR426C	-	IV:1320063-1322006	3.9116	0	9.37916	OK	2.17956	0	5.20395	OK	4.66531	0	9.4587	OK	4.04465	0	8.47193	OK
YDR427W	YDR427W	RPN9	IV:1322204-1323386	89.4255	69.4981	109.353	OK	119.648	93.0196	146.276	OK	113.414	88.1733	138.655	OK	118.362	92.016	144.709	OK
YDR428C	YDR428C	BNA7	IV:1323453-1324239	10.1222	6.73224	13.5121	OK	6.93737	4.25461	9.62013	OK	9.71117	6.42547	12.9969	OK	4.7544	2.64027	6.86853	OK
YDR429C	YDR429C	TIF35	IV:1324476-1325301	268.667	207.811	329.522	OK	100.989	78.2893	123.688	OK	183.539	142.715	224.363	OK	91.4988	70.8793	112.118	OK
YDR430C	YDR430C	CYM1	IV:1325500-1328701	34.4497	26.7383	42.1611	OK	44.4765	34.5725	54.3806	OK	38.5411	29.9709	47.1112	OK	38.6941	30.0767	47.3114	OK
YDR431W	YDR431W	-	IV:1325500-1328701	0.156456	0	1.44665	OK	0.216352	0	2.04337	OK	0	0	0	OK	0.707289	0	4.03381	OK
YDR432W	YDR432W	NPL3	IV:1328782-1330040	76.672	58.9923	94.3516	OK	76.9676	59.2067	94.7284	OK	85.468	65.8479	105.088	OK	79.5136	61.3344	97.6928	OK
YDR433W	YDR433W	-	IV:1328782-1330040	18.9526	0.233113	37.6722	OK	15.1358	0	32.7536	OK	13.5904	0	32.8453	OK	17.1344	0	35.0625	OK
YDR434W	YDR434W	GPI17	IV:1331236-1332841	88.6758	68.8515	108.5	OK	85.5159	66.4857	104.546	OK	100.541	78.08	123.001	OK	82.4326	64.0026	100.863	OK
YDR435C	YDR435C	PPM1	IV:1332982-1333969	12.849	9.04881	16.6492	OK	23.3196	17.273	29.3662	OK	20.6634	15.1924	26.1344	OK	25.6736	19.1281	32.219	OK
YDR436W	YDR436W	PPZ2	IV:1334820-1336953	7.7158	5.61103	9.82057	OK	14.17	10.6948	17.6451	OK	12.3779	9.29128	15.4645	OK	17.8951	13.6677	22.1224	OK
YDR437W	YDR437W	GPI19	IV:1337351-1337774	33.4374	23.2432	43.6316	OK	24.5334	16.3547	32.7122	OK	35.1064	24.547	45.6657	OK	27.3187	18.6294	36.008	OK
YDR438W	YDR438W	THI74	IV:1338273-1339386	31.8962	24.158	39.6344	OK	25.8749	19.4128	32.337	OK	28.1181	21.184	35.0521	OK	27.7012	20.8416	34.5607	OK
YDR439W	YDR439W	LRS4	IV:1339675-1340719	16.8505	12.238	21.4631	OK	15.2912	11.0455	19.5369	OK	14.7034	10.6002	18.8065	OK	14.7392	10.6159	18.8624	OK
YDR440W	YDR440W	DOT1	IV:1342492-1344241	19.3099	14.6512	23.9685	OK	13.6881	10.2006	17.1756	OK	13.6305	10.1641	17.0968	OK	13.2475	9.86339	16.6317	OK
YDR441C	YDR441C	APT2	IV:1344516-1345062	19.5197	13.3088	25.7307	OK	6.37646	3.23189	9.52103	OK	19.204	13.1444	25.2637	OK	11.5918	7.23541	15.9481	OK
YDR442W	YDR442W	-	IV:1345646-1349938	0.533683	0	3.79237	OK	0.101277	0	1.08078	OK	0	0	0	OK	0	0	0	OK
YDR443C	YDR443C	SSN2	IV:1345646-1349938	21.7073	16.7865	26.6281	OK	22.8705	17.7787	27.9624	OK	19.0715	14.8144	23.3285	OK	21.2365	16.5079	25.9651	OK
YDR444W	YDR444W	-	IV:1350289-1352589	40.3235	31.3285	49.3184	OK	25.6681	19.7909	31.5453	OK	26.3489	20.3247	32.373	OK	20.083	15.3652	24.8009	OK
YDR445C	YDR445C	-	IV:1350289-1352589	0.1044	0	1.04683	OK	0.122015	0	1.06464	OK	0	0	0	OK	0.441572	0	2.03658	OK
YDR446W	YDR446W	ECM11	IV:1353724-1354633	0.0314158	0	0.306826	OK	0.106225	0	0.400291	OK	0.236011	0	0.624322	OK	0.102323	0	0.385406	OK
YDR447C	YDR447C	RPS17B	IV:1354828-1355553	1191.44	891.328	1491.54	OK	275.112	212.958	337.266	OK	723.951	559.989	887.913	OK	302.368	234.762	369.973	OK
YDR448W	YDR448W	ADA2	IV:1356064-1357369	36.3235	27.8845	44.7624	OK	26.8818	20.3993	33.3643	OK	22.9107	17.255	28.5664	OK	19.6142	14.6521	24.5762	OK
YDR449C	YDR449C	UTP6	IV:1357579-1358902	7.91958	5.56316	10.276	OK	1.00144	0.298114	1.70476	OK	5.47375	3.64591	7.3016	OK	0.908837	0.240056	1.57762	OK
YDR450W	YDR450W	RPS18A	IV:1359922-1360798	1589.6	1193.94	1985.27	OK	677.236	524.147	830.324	OK	912.66	701.191	1124.13	OK	496.397	385.598	607.196	OK
YDR451C	YDR451C	YHP1	IV:1361119-1362181	27.012	20.2371	33.7868	OK	24.2714	18.1026	30.4403	OK	15.3975	11.155	19.64	OK	15.2654	11.0445	19.4864	OK
YDR452W	YDR452W	PPN1	IV:1362877-1364902	123.37	95.0051	151.736	OK	178.374	135.982	220.766	OK	159.256	121.898	196.613	OK	179.303	136.665	221.942	OK
YDR453C	YDR453C	TSA2	IV:1365071-1365662	4.00056	1.70832	6.29279	OK	14.5255	9.62235	19.4287	OK	48.1517	35.8044	60.499	OK	96.9702	74.5304	119.41	OK
YDR454C	YDR454C	GUK1	IV:1366263-1366827	140.221	107.375	173.066	OK	91.8493	70.1387	113.56	OK	107.021	82.3148	131.727	OK	95.1239	72.7823	117.465	OK
YDR455C	YDR455C	-	IV:1367372-1369386	0.495758	0	4.43103	OK	0.312779	0	2.1485	OK	0	0	0	OK	0	0	0	OK
YDR456W	YDR456W	NHX1	IV:1367372-1369386	49.4614	38.3961	60.5268	OK	46.4127	35.9783	56.8471	OK	45.4695	35.3502	55.5887	OK	41.6506	32.3286	50.9725	OK
YDR457W	YDR457W	TOM1	IV:1369789-1379596	72.2746	53.2958	91.2533	OK	61.2772	45.6054	76.949	OK	59.2836	44.3401	74.2271	OK	58.0001	43.4182	72.5821	OK
YDR458C	YDR458C	HEH2	IV:1380054-1382046	43.9031	34.0124	53.7937	OK	45.9447	35.7223	56.1671	OK	35.7707	27.7366	43.8049	OK	32.9535	25.5206	40.3864	OK
YDR459C	YDR459C	PFA5	IV:1382318-1383443	25.3535	18.9809	31.726	OK	20.1784	14.9546	25.4022	OK	20.5358	15.2358	25.8358	OK	19.6584	14.5521	24.7647	OK
YDR460W	YDR460W	TFB3	IV:1383810-1384776	28.4673	21.2891	35.6455	OK	30.3768	22.7914	37.9622	OK	29.8457	22.3917	37.2997	OK	28.264	21.1221	35.406	OK
YDR461C-A	YDR461C-A	-	IV:1385523-1385766	26.613	13.1597	40.0663	OK	70.7594	46.8393	94.6795	OK	22.953	10.8936	35.0123	OK	66.8959	44.415	89.3768	OK
YDR461W	YDR461W	MFA1	IV:1385175-1385286	113.099	0	325.067	OK	115.674	0	303.277	OK	92.9738	87.5317	98.4158	OK	147.952	0	333.345	OK
YDR462W	YDR462W	MRPL28	IV:1386072-1386516	5.12983	1.86277	8.39689	OK	7.54533	3.60072	11.4899	OK	7.60642	3.66692	11.5459	OK	8.38445	4.29336	12.4755	OK
YDR463W	YDR463W	STP1	IV:1386815-1388375	39.1323	30.2006	48.0639	OK	42.9226	33.1994	52.6457	OK	35.5128	27.3973	43.6283	OK	34.8191	26.8486	42.7897	OK
YDR464C-A	YDR464C-A	-	IV:1388871-1393179	0	0	0	OK	0	0	0	OK	0	0	0	OK	0	0	0	OK
YDR464W	YDR464W	SPP41	IV:1388871-1393179	38.1955	29.2673	47.1237	OK	30.9362	24.0182	37.8543	OK	22.8903	17.7979	27.9827	OK	24.016	18.6602	29.3717	OK
YDR465C	YDR465C	RMT2	IV:1393335-1394574	55.7597	43.137	68.3824	OK	3.37105	2.00164	4.74045	OK	40.0838	30.8238	49.3438	OK	7.7242	5.35288	10.0955	OK
YDR466W	YDR466W	PKH3	IV:1395120-1397909	23.7092	18.2425	29.176	OK	22.4543	17.3381	27.5704	OK	18.5693	14.2847	22.8539	OK	21.0682	16.2676	25.8688	OK
YDR467C	YDR467C	-	IV:1395120-1397909	6.64561	0	18.3146	OK	2.54454	0	9.39398	OK	3.72328	0	11.1416	OK	1.54199	0	6.66371	OK
YDR468C	YDR468C	TLG1	IV:1398025-1398700	54.391	41.1009	67.681	OK	66.3598	50.596	82.1235	OK	52.9183	39.9498	65.8867	OK	63.7559	48.5629	78.9489	OK
YDR469W	YDR469W	SDC1	IV:1399014-1399542	52.6671	39.0144	66.3199	OK	61.7123	46.0985	77.326	OK	48.0214	35.3928	60.6501	OK	52.2772	38.737	65.8174	OK
YDR470C	YDR470C	UGO1	IV:1399705-1401214	13.5249	9.98491	17.065	OK	15.979	11.9101	20.048	OK	13.5344	9.97992	17.0888	OK	14.6387	10.8564	18.421	OK
YDR471W	YDR471W	RPL27B	IV:1401769-1402564	738.232	570.223	906.242	OK	172.82	132.758	212.882	OK	444.776	345.8	543.751	OK	74.3491	54.9976	93.7006	OK
YDR472W	YDR472W	TRS31	IV:1403321-1404173	29.7944	22.1113	37.4774	OK	20.4588	14.826	26.0917	OK	23.6515	17.3216	29.9814	OK	22.5081	16.4276	28.5887	OK
YDR473C	YDR473C	PRP3	IV:1404444-1405854	19.3818	14.5308	24.2328	OK	19.522	14.6229	24.4211	OK	18.3753	13.7478	23.0028	OK	24.0612	18.2441	29.8782	OK
YDR475C	YDR475C	JIP4	IV:1407463-1410094	61.5066	47.7029	75.3103	OK	123.552	94.451	152.653	OK	58.1992	45.1993	71.199	OK	89.0709	68.7281	109.414	OK
YDR476C	YDR476C	-	IV:1410452-1411127	18.6339	13.1335	24.1343	OK	22.8838	16.2735	29.4942	OK	22.3175	15.9014	28.7336	OK	28.002	20.3226	35.6813	OK
YDR477W	YDR477W	SNF1	IV:1412372-1414274	48.2724	37.4976	59.0472	OK	42.6361	33.1046	52.1676	OK	39.7534	30.8203	48.6865	OK	36.2287	28.0812	44.3762	OK
YDR478W	YDR478W	SNM1	IV:1414574-1415171	17.3187	11.8414	22.7959	OK	8.0159	4.7069	11.3249	OK	13.1682	8.62336	17.7131	OK	9.66738	5.96657	13.3682	OK
YDR479C	YDR479C	PEX29	IV:1415209-1416874	27.8218	21.3688	34.2749	OK	39.019	30.1866	47.8513	OK	33.1581	25.5871	40.7291	OK	36.6031	28.2821	44.9241	OK
YDR480W	YDR480W	DIG2	IV:1417398-1418370	3.50554	1.90413	5.10696	OK	6.08711	3.85506	8.31916	OK	4.84172	2.90382	6.77963	OK	5.5873	3.49867	7.67592	OK
YDR481C	YDR481C	PHO8	IV:1418549-1420250	125.075	96.6948	153.455	OK	475.442	351.084	599.799	OK	236.395	179.607	293.184	OK	534.052	391.863	676.241	OK
YDR482C	YDR482C	CWC21	IV:1420430-1420838	25.488	16.8879	34.088	OK	25.4976	16.9285	34.0667	OK	13.3904	7.75166	19.0292	OK	24.7596	16.4533	33.0659	OK
YDR483W	YDR483W	KRE2	IV:1421156-1422485	192.152	148.236	236.069	OK	193.129	148.998	237.26	OK	183.548	141.714	225.382	OK	168.642	130.387	206.898	OK
YDR484W	YDR484W	VPS52	IV:1422762-1424688	20.0108	15.2823	24.7393	OK	20.996	16.054	25.9381	OK	18.5893	14.1499	23.0287	OK	18.0487	13.7211	22.3763	OK
YDR485C	YDR485C	VPS72	IV:1424819-1427207	37.2075	28.8049	45.6102	OK	34.2348	26.5809	41.8887	OK	29.7957	23.0681	36.5233	OK	33.2148	25.7882	40.6414	OK
YDR486C	YDR486C	VPS60	IV:1427430-1428120	25.6525	18.4925	32.8126	OK	41.0437	30.5921	51.4953	OK	40.5961	30.268	50.9242	OK	55.6326	42.1836	69.0816	OK
YDR487C	YDR487C	RIB3	IV:1428353-1428980	117.615	90.6311	144.599	OK	115.455	89.1057	141.805	OK	121.081	93.5931	148.569	OK	110.701	85.4621	135.939	OK
YDR488C	YDR488C	PAC11	IV:1429187-1430789	32.4732	24.9871	39.9593	OK	41.5539	32.1604	50.9474	OK	34.1185	26.261	41.976	OK	44.8749	34.7772	54.9726	OK
YDR489W	YDR489W	SLD5	IV:1431011-1431896	16.3624	11.6708	21.0541	OK	6.39463	4.01772	8.77154	OK	10.5935	7.26331	13.9236	OK	6.66544	4.19718	9.13369	OK
YDR490C	YDR490C	PKH1	IV:1431967-1434268	20.0038	15.3773	24.6303	OK	22.5762	17.4082	27.7442	OK	24.945	19.2546	30.6353	OK	27.4156	21.2193	33.612	OK
YDR491C	YDR491C	-	IV:1434499-1435874	0.299873	0	1.31815	OK	0.304262	0	1.17265	OK	0.74424	0	2.31794	OK	0	0	0	OK
YDR492W	YDR492W	IZH1	IV:1434499-1435874	19.1302	13.9016	24.3589	OK	9.32332	6.3625	12.2841	OK	18.4538	13.3866	23.521	OK	11.127	7.77237	14.4817	OK
YDR493W	YDR493W	MZM1	IV:1436216-1436588	8.37592	3.56798	13.1839	OK	11.4511	5.81008	17.0922	OK	8.80577	3.91064	13.7009	OK	10.8426	5.49293	16.1923	OK
YDR494W	YDR494W	RSM28	IV:1436929-1438015	42.3973	32.4959	52.2987	OK	48.3947	37.2447	59.5446	OK	41.0077	31.4052	50.6101	OK	43.581	33.4045	53.7576	OK
YDR495C	YDR495C	VPS3	IV:1438114-1441150	17.2728	13.2794	21.2662	OK	19.0855	14.7446	23.4263	OK	14.9489	11.486	18.4117	OK	20.3058	15.7115	24.9001	OK
YDR496C	YDR496C	PUF6	IV:1441432-1443403	70.1945	54.5356	85.8535	OK	2.99959	1.94189	4.05729	OK	36.3331	28.1615	44.5047	OK	8.38555	6.10501	10.6661	OK
YDR497C	YDR497C	ITR1	IV:1443712-1445467	258.22	195.158	321.282	OK	283.093	213.626	352.561	OK	219.165	166.838	271.492	OK	221.887	168.638	275.136	OK
YDR498C	YDR498C	SEC20	IV:1445842-1446994	23.5143	17.6024	29.4262	OK	20.5528	15.2694	25.8363	OK	19.5946	14.5206	24.6686	OK	16.479	12.0837	20.8743	OK
YDR499W	YDR499W	LCD1	IV:1447829-1450073	25.3099	19.5362	31.0836	OK	27.2245	21.0535	33.3954	OK	19.3654	14.8631	23.8677	OK	21.9246	16.8733	26.9759	OK
YDR500C	YDR500C	RPL37B	IV:1450197-1450853	750.231	581.61	918.852	OK	260.19	196.817	323.562	OK	657.518	510.07	804.967	OK	213.544	160.023	267.064	OK
YDR501W	YDR501W	PLM2	IV:1451352-1452918	4.63639	3.09739	6.1754	OK	3.62196	2.31138	4.93254	OK	9.71288	7.01359	12.4122	OK	8.09572	5.7632	10.4282	OK
YDR502C	YDR502C	SAM2	IV:1453309-1454464	23.3315	17.4568	29.2063	OK	32.4039	24.6504	40.1574	OK	23.9612	17.9617	29.9606	OK	28.4531	21.4965	35.4098	OK
YDR503C	YDR503C	LPP1	IV:1455041-1455866	18.0105	12.8306	23.1903	OK	22.1057	16.0301	28.1814	OK	23.2908	16.9842	29.5973	OK	26.2952	19.3722	33.2182	OK
YDR504C	YDR504C	SPG3	IV:1456310-1456694	10.817	5.45595	16.1781	OK	18.8384	11.5179	26.1588	OK	11.627	6.13788	17.116	OK	17.0676	10.3684	23.7669	OK
YDR505C	YDR505C	PSP1	IV:1456694-1459220	69.4458	53.7702	85.1215	OK	139.475	106.197	172.752	OK	77.1907	59.7961	94.5853	OK	117.864	90.3565	145.371	OK
YDR506C	YDR506C	-	IV:1459727-1461554	17.5745	13.3001	21.849	OK	26.5532	20.4355	32.671	OK	28.5528	21.9817	35.1239	OK	37.1909	28.8196	45.5622	OK
YDR507C	YDR507C	GIN4	IV:1462357-1465786	35.1568	27.1891	43.1246	OK	34.6718	26.9233	42.4204	OK	23.3752	18.1398	28.6106	OK	23.9822	18.6417	29.3226	OK
YDR508C	YDR508C	GNP1	IV:1466452-1468573	178.564	136.164	220.964	OK	93.3144	72.3259	114.303	OK	163.717	125.197	202.237	OK	109.587	84.6627	134.512	OK
YDR509W	YDR509W	-	IV:1466452-1468573	4.20831	0	24.735	OK	1.25274	0	7.21294	OK	3.2567	0	20.163	OK	2.17676	0	13.1807	OK
YDR510C-A	YDR510C-A	-	IV:1469399-1469811	0	0	0	OK	0	0	0	OK	0	0	0	OK	0	0	0	OK
YDR510W	YDR510W	SMT3	IV:1469399-1469811	122.383	89.7354	155.031	OK	134.021	99.0971	168.945	OK	100.226	72.917	127.535	OK	114.123	83.8932	144.353	OK
YDR511W	YDR511W	ACN9	IV:1470016-1470418	7.00953	2.92015	11.0989	OK	9.15231	4.41341	13.8912	OK	9.79332	4.98483	14.6018	OK	12.5239	7.02529	18.0226	OK
YDR512C	YDR512C	EMI1	IV:1470499-1471448	22.4322	13.1927	31.6717	OK	43.8554	24.844	62.8668	OK	35.251	17.3531	53.1489	OK	59.8513	33.1715	86.531	OK
YDR513W	YDR513W	GRX2	IV:1470499-1471448	51.873	34.6464	69.0997	OK	141.858	102.105	181.612	OK	157.078	114.435	199.721	OK	205.21	148.411	262.008	OK
YDR514C	YDR514C	-	IV:1471547-1472999	27.1943	20.7651	33.6235	OK	8.26299	5.90712	10.6188	OK	20.1733	15.1965	25.1502	OK	8.75572	6.24323	11.2682	OK
YDR515W	YDR515W	SLF1	IV:1473428-1474772	23.0938	17.432	28.7556	OK	24.8553	18.8264	30.8841	OK	33.9532	26.0444	41.862	OK	36.3761	27.9747	44.7775	OK
YDR516C	YDR516C	EMI2	IV:1474973-1476476	31.6356	24.2404	39.0309	OK	101.891	79.0641	124.718	OK	109.71	85.1487	134.272	OK	114.572	88.7199	140.424	OK
YDR517W	YDR517W	GRH1	IV:1477238-1478357	54.7011	42.1685	67.2338	OK	99.5917	77.3825	121.801	OK	61.4535	47.4725	75.4346	OK	76.9409	59.7115	94.1702	OK
YDR518W	YDR518W	EUG1	IV:1478607-1480161	23.708	18.0271	29.3888	OK	27.7306	21.2296	34.2316	OK	34.9311	26.8665	42.9958	OK	25.9103	19.8116	32.009	OK
YDR519W	YDR519W	FPR2	IV:1480424-1480832	84.0036	61.8334	106.174	OK	99.5162	74.524	124.509	OK	94.2009	70.5802	117.822	OK	101.926	76.7107	127.141	OK
YDR520C	YDR520C	URC2	IV:1481084-1483476	20.0766	15.4268	24.7264	OK	14.1739	10.753	17.5947	OK	15.0036	11.4191	18.5881	OK	12.4713	9.40663	15.5359	OK
YDR521W	YDR521W	-	IV:1481084-1483476	0.135469	0	0.970924	OK	0	0	0	OK	0	0	0	OK	0	0	0	OK
YDR522C	YDR522C	SPS2	IV:1483794-1485303	0.411052	0	0.83982	OK	0.34554	0	0.736716	OK	0.356524	0	0.74574	OK	0.474014	0.0138945	0.934134	OK
YDR523C	YDR523C	SPS1	IV:1485565-1487038	3.12332	1.90342	4.34321	OK	0.89051	0.267828	1.51319	OK	3.88729	2.49002	5.28456	OK	2.94773	1.76834	4.12712	OK
YDR524C	YDR524C	AGE1	IV:1487541-1488990	32.9988	25.3581	40.6396	OK	18.5158	13.8761	23.1554	OK	26.9856	20.6025	33.3688	OK	20.046	15.0955	24.9965	OK
YDR524C-A	YDR524C-A	-	IV:1489870-1490234	0	0	0	OK	7.37084	4.48361	10.2581	OK	0	0	0	OK	0	0	0	OK
YDR524C-B	YDR524C-B	-	IV:1489597-1489798	704.712	538.5	870.924	OK	693.853	530.778	856.929	OK	750.435	576.064	924.807	OK	576.172	437.81	714.533	OK
YDR524W-C	YDR524W-C	-	IV:1489402-1489492	0	0	0	OK	0	0	0	OK	0	0	0	OK	0	0	0	OK
YDR525W	YDR525W	API2	IV:1489870-1490234	0.140195	0	0.993653	OK	0.647535	0	2.63248	OK	0	0	0	OK	0	0	0	OK
YDR525W-A	YDR525W-A	SNA2	IV:1490595-1490835	9.91092	1.87516	17.9467	OK	10.1559	1.77867	18.5331	OK	16.1776	5.9185	26.4367	OK	22.2982	10.2828	34.3136	OK
YDR526C	YDR526C	-	IV:1491074-1492413	3.94818	0	10.676	OK	0.843521	0	2.87353	OK	0.61735	0	2.74111	OK	1.65817	0	5.52942	OK
YDR527W	YDR527W	RBA50	IV:1491074-1492413	53.0553	40.9262	65.1844	OK	18.5893	13.8372	23.3414	OK	33.624	25.7575	41.4906	OK	24.2989	18.3325	30.2654	OK
YDR528W	YDR528W	HLR1	IV:1494585-1495857	6.2682	4.22962	8.30678	OK	5.3279	3.50092	7.15489	OK	3.78119	2.30354	5.25883	OK	3.63961	2.20944	5.06977	OK
YDR529C	YDR529C	QCR7	IV:1496164-1496548	122.285	91.6381	152.933	OK	212.489	163.533	261.444	OK	167.044	127.872	206.216	OK	272.936	211.465	334.408	OK
YDR530C	YDR530C	APA2	IV:1496790-1497768	24.5402	18.2121	30.8684	OK	39.405	29.9641	48.846	OK	24.7202	18.3335	31.1069	OK	39.7552	30.2665	49.2439	OK
YDR531W	YDR531W	CAB1	IV:1498231-1499335	47.0875	36.0904	58.0847	OK	57.2064	44.1631	70.2497	OK	53.7953	41.4637	66.1269	OK	63.3863	49.0771	77.6955	OK
YDR532C	YDR532C	KRE28	IV:1499395-1500553	17.1451	12.6058	21.6844	OK	22.1921	16.5594	27.8247	OK	15.88	11.6147	20.1453	OK	22.3134	16.6715	27.9553	OK
YDR533C	YDR533C	HSP31	IV:1501446-1502160	14.6267	10.0689	19.1845	OK	26.016	18.8519	33.1801	OK	26.5008	19.2246	33.7771	OK	37.8054	28.145	47.4658	OK
YDR534C	YDR534C	FIT1	IV:1503313-1504900	1.91261	1.02169	2.80352	OK	1.39154	0.647952	2.13512	OK	3.52086	2.2349	4.80682	OK	2.13317	1.19857	3.06776	OK
YDR535C	YDR535C	-	IV:1506605-1507362	2.59646	0.49416	4.69875	OK	0.856778	0	2.06758	OK	2.22985	0.291383	4.16831	OK	2.18425	0.252443	4.11605	OK
YDR536W	YDR536W	STL1	IV:1508004-1509714	0.29253	0	0.633001	OK	0.502771	0.0723288	0.933213	OK	0.721382	0.218846	1.22392	OK	0.72622	0.22407	1.22837	OK
YDR537C	YDR537C	-	IV:1510855-1511630	1.29404	0	3.35848	OK	0.506782	0	1.4298	OK	0.862827	0	2.14846	OK	0.685192	0	2.02203	OK
YDR538W	YDR538W	PAD1	IV:1510855-1511630	15.5127	10.6598	20.3656	OK	10.5783	6.94507	14.2114	OK	11.4165	7.59721	15.2358	OK	11.9487	7.92914	15.9683	OK
YDR539W	YDR539W	FDC1	IV:1512093-1513605	27.2275	20.8246	33.6304	OK	42.3948	32.7582	52.0315	OK	25.423	19.3941	31.4519	OK	36.6425	28.2485	45.0365	OK
YDR540C	YDR540C	IRC4	IV:1517135-1517675	8.09719	4.53555	11.6588	OK	19.8384	13.5417	26.1351	OK	6.65128	3.45316	9.84939	OK	17.4817	11.7587	23.2047	OK
YDR541C	YDR541C	-	IV:1519663-1520698	10.6574	7.50323	13.8116	OK	12.6075	8.96019	16.2548	OK	10.8767	7.62577	14.1277	OK	12.0484	8.55707	15.5396	OK
YDR542W	YDR542W	PAU10	IV:1523248-1523611	0.612989	0	2.28688	OK	0	0	0	OK	1.08959	0	2.66158	OK	0	0	0	OK
YDR543C	YDR543C	-	IV:1524633-1524933	0	0	0	OK	0	0	0	OK	0	0	0	OK	0	0	0	OK
YDR544C	YDR544C	-	IV:1525094-1525523	0.0961592	0	0.725246	OK	0.322347	0	1.21067	OK	0.638722	0	1.66306	OK	0	0	0	OK
YDR545C-A	YDR545C-A	-	IV:1526320-1531711	0	0	0	OK	0	0	0	OK	0	0	0	OK	0	0	0	OK
YDR545W	YDR545W	YRF1-1	IV:1526320-1531711	0.252133	0.0898688	0.414397	OK	0.365881	0.164647	0.567114	OK	0.213244	0.0641988	0.36229	OK	0.0865425	0	0.187006	OK
YEL001C	YEL001C	IRC22	V:150300-150978	140.578	107.686	173.471	OK	115.643	89.2	142.086	OK	154.948	120.137	189.759	OK	132.174	102.534	161.813	OK
YEL002C	YEL002C	WBP1	V:148721-150014	116.607	90.388	142.827	OK	112.894	87.7433	138.045	OK	129.624	100.616	158.633	OK	121.728	94.4471	149.008	OK
YEL003W	YEL003W	GIM4	V:148175-148599	204.966	155.96	253.972	OK	124.278	92.5777	155.978	OK	176.735	134.401	219.069	OK	140.901	105.982	175.82	OK
YEL004W	YEL004W	YEA4	V:146950-147979	17.738	12.9274	22.5487	OK	13.08	9.31313	16.8468	OK	18.5022	13.5094	23.4951	OK	16.4896	11.9621	21.0172	OK
YEL005C	YEL005C	VAB2	V:145906-146755	7.01706	4.41325	9.62087	OK	9.27067	6.17763	12.3637	OK	8.23969	5.37224	11.1071	OK	11.6036	7.97638	15.2307	OK
YEL006W	YEL006W	YEA6	V:144326-145334	37.1108	28.1741	46.0476	OK	54.9637	42.3188	67.6086	OK	31.7667	23.9614	39.572	OK	40.6948	31.0493	50.3403	OK
YEL007W	YEL007W	MIT1	V:141891-143892	16.9883	12.8524	21.1241	OK	10.0682	7.40636	12.73	OK	12.6038	9.42155	15.7861	OK	6.75121	4.84751	8.65491	OK
YEL008C-A	YEL008C-A	-	V:140511-140892	0	0	0	OK	0	0	0	OK	0	0	0	OK	0	0	0	OK
YEL008W	YEL008W	-	V:140511-140892	4.98403	1.37932	8.58874	OK	2.07718	0	4.49728	OK	2.32998	0	4.68029	OK	0.83619	0	2.31514	OK
YEL009C	YEL009C	GCN4	V:138917-139763	186.478	144.863	228.092	OK	134.776	104.692	164.861	OK	156.006	121.254	190.757	OK	151.637	117.905	185.369	OK
YEL009C-A	YEL009C-A	-	V:136278-136778	0.300638	0	1.08983	OK	0.0951998	0	0.758604	OK	1.8004	0	3.85488	OK	1.49444	0	3.3635	OK
YEL010W	YEL010W	-	V:136278-136778	0	0	0	OK	0	0	0	OK	0.408884	0	1.19825	OK	0	0	0	OK
YEL011W	YEL011W	GLC3	V:133119-135234	15.9015	12.0735	19.7295	OK	87.6252	67.9468	107.304	OK	60.1239	46.7074	73.5404	OK	123.678	95.1593	152.196	OK
YEL012W	YEL012W	UBC8	V:131771-132551	4.97634	2.53653	7.41615	OK	22.3208	15.8339	28.8076	OK	10.5811	6.74377	14.4185	OK	25.6972	18.4453	32.9492	OK
YEL013W	YEL013W	VAC8	V:128824-130561	107.591	83.426	131.755	OK	117.817	91.2094	144.424	OK	138.1	106.577	169.624	OK	135.987	104.982	166.992	OK
YEL014C	YEL014C	-	V:128302-128608	0.162696	0	1.0964	OK	0	0	0	OK	0	0	0	OK	0	0	0	OK
YEL015W	YEL015W	EDC3	V:126628-128284	78.5419	61.049	96.0349	OK	48.958	38.0042	59.9119	OK	47.7646	37.0633	58.4659	OK	36.9796	28.5895	45.3696	OK
YEL016C	YEL016C	NPP2	V:124736-126218	41.7901	32.3023	51.2779	OK	41.0154	31.6824	50.3483	OK	39.0805	30.1662	47.9948	OK	40.5336	31.3198	49.7475	OK
YEL017C-A	YEL017C-A	PMP2	V:122797-122929	814.443	551.906	1076.98	OK	549.423	349.979	748.867	OK	516.724	330.436	703.011	OK	392.25	240.057	544.443	OK
YEL017W	YEL017W	GTT3	V:123656-124670	38.2343	29.0502	47.4184	OK	40.4573	30.8692	50.0455	OK	30.3292	22.7959	37.8625	OK	29.8503	22.4638	37.2369	OK
YEL018C-A	YEL018C-A	-	V:121454-122310	4.75204	0	9.65578	OK	3.17472	0	6.65067	OK	2.04633	0	4.74553	OK	1.31415	0	3.66271	OK
YEL018W	YEL018W	EAF5	V:121454-122310	33.6092	24.8774	42.3409	OK	26.5687	19.4402	33.6972	OK	20.2989	14.602	25.9958	OK	20.2146	14.528	25.9012	OK
YEL019C	YEL019C	MMS21	V:120497-121301	17.9862	12.8355	23.1369	OK	12.2744	8.45147	16.0973	OK	11.141	7.57444	14.7075	OK	10.9989	7.45757	14.5403	OK
YEL020C	YEL020C	-	V:118616-120299	24.639	18.8633	30.4147	OK	29.6147	22.7995	36.4298	OK	22.372	17.0526	27.6915	OK	33.3866	25.7724	41.0009	OK
YEL020C-B	YEL020C-B	-	V:117182-117474	1.95603	0	5.34281	OK	1.65832	0	4.99413	OK	0	0	0	OK	1.42458	0	4.37105	OK
YEL020W-A	YEL020W-A	TIM9	V:117182-117474	50.3687	32.2166	68.5209	OK	64.0612	43.1563	84.9662	OK	58.6973	39.2173	78.1772	OK	99.1091	70.4527	127.765	OK
YEL021W	YEL021W	URA3	V:116166-116970	0	0	0	OK	0	0	0	OK	14.1551	9.9367	18.3736	OK	9.24438	6.0978	12.391	OK
YEL022W	YEL022W	GEA2	V:111420-115800	44.6331	34.4752	54.791	OK	27.853	21.6441	34.0619	OK	33.5183	26.0275	41.009	OK	21.9391	17.062	26.8161	OK
YEL023C	YEL023C	-	V:108503-110552	16.343	12.4026	20.2835	OK	11.8859	8.87244	14.8994	OK	18.6043	14.2075	23.001	OK	16.0827	12.1941	19.9713	OK
YEL024W	YEL024W	RIP1	V:107259-107907	22.9495	16.2982	29.6009	OK	37.6507	27.8097	47.4916	OK	31.7716	23.2141	40.3291	OK	44.8341	33.4652	56.203	OK
YEL025C	YEL025C	-	V:102580-106147	59.7191	46.099	73.3392	OK	61.7631	47.7082	75.8181	OK	51.3298	39.7999	62.8597	OK	54.9997	42.5629	67.4364	OK
YEL026W	YEL026W	SNU13	V:101942-102323	56.9039	40.8366	72.9712	OK	4.34322	0.920685	7.76575	OK	51.1238	36.3626	65.885	OK	11.0976	5.75568	16.4396	OK
YEL027W	YEL027W	VMA3	V:100768-101251	275.561	214.105	337.017	OK	210.64	163.338	257.942	OK	323.317	251.213	395.422	OK	204.927	158.881	250.972	OK
YEL028W	YEL028W	-	V:98667-99129	9.00864	4.81454	13.2028	OK	4.79707	1.73593	7.85822	OK	5.89922	2.61054	9.1879	OK	5.59743	2.33043	8.86444	OK
YEL029C	YEL029C	BUD16	V:96857-97796	22.8625	16.7969	28.928	OK	16.5784	11.9323	21.2244	OK	20.2241	14.7794	25.6688	OK	19.1114	13.8487	24.374	OK
YEL030C-A	YEL030C-A	-	V:94582-96578	0.967293	0	4.0593	OK	0.3629	0	1.96556	OK	0	0	0	OK	0	0	0	OK
YEL030W	YEL030W	ECM10	V:94582-96578	10.9697	8.12241	13.8171	OK	13.285	9.94319	16.6269	OK	9.43461	6.9272	11.942	OK	10.4291	7.69475	13.1635	OK
YEL031W	YEL031W	SPF1	V:90257-93905	178.518	132.858	224.177	OK	187.751	139.447	236.056	OK	202.129	149.534	254.724	OK	161.872	121.092	202.652	OK
YEL032C-A	YEL032C-A	-	V:86936-89852	0	0	0	OK	0	0	0	OK	0	0	0	OK	0	0	0	OK
YEL032W	YEL032W	MCM3	V:86936-89852	68.0481	52.6723	83.424	OK	55.3038	42.9154	67.6922	OK	51.3427	39.8834	62.802	OK	40.997	31.8691	50.1248	OK
YEL033W	YEL033W	MTC7	V:85612-86598	54.5229	14.6587	94.3871	OK	42.7974	13.0903	72.5046	OK	64.5292	18.4699	110.588	OK	36.6427	9.59673	63.6887	OK
YEL034C-A	YEL034C-A	-	V:85612-86598	2.07083	0	7.83528	OK	2.63944	0	8.16359	OK	2.33197	0	8.84648	OK	3.21769	0	9.27228	OK
YEL034W	YEL034W	HYP2	V:85612-86598	403.268	308.058	498.479	OK	288.766	220.252	357.281	OK	448.311	340.671	555.95	OK	290.088	221.687	358.489	OK
YEL035C	YEL035C	UTR5	V:85044-85545	0.852961	0	2.06672	OK	0.933685	0	2.14449	OK	1.27744	0	2.80993	OK	0.670381	0	1.63382	OK
YEL036C	YEL036C	ANP1	V:83049-84552	99.8697	77.6658	122.074	OK	46.7836	36.2548	57.3123	OK	89.9203	69.916	109.925	OK	54.3964	42.2236	66.5693	OK
YEL037C	YEL037C	RAD23	V:81406-82603	39.6462	30.4443	48.848	OK	38.5493	29.5629	47.5356	OK	37.1019	28.4243	45.7795	OK	31.629	24.0531	39.2048	OK
YEL038W	YEL038W	UTR4	V:80461-81145	32.9422	24.0425	41.8419	OK	39.4242	29.2372	49.6113	OK	26.8612	19.4166	34.3058	OK	34.9643	25.8343	44.0943	OK
YEL039C	YEL039C	CYC7	V:79635-79977	8.27656	3.16489	13.3882	OK	52.3927	36.9171	67.8682	OK	47.8952	33.4987	62.2917	OK	98.5065	72.7821	124.231	OK
YEL040W	YEL040W	UTR2	V:78052-79456	302.372	229.564	375.18	OK	144.245	111.806	176.683	OK	188.37	145.122	231.619	OK	79.1722	61.5794	96.765	OK
YEL041W	YEL041W	YEF1	V:75943-77431	2.8275	1.68888	3.96613	OK	9.88347	7.12213	12.6448	OK	6.54583	4.5284	8.56326	OK	11.0755	8.05172	14.0993	OK
YEL042W	YEL042W	GDA1	V:73770-75327	106.113	82.3552	129.871	OK	54.3255	42.1923	66.4587	OK	88.9968	69.1777	108.816	OK	45.7291	35.4527	56.0055	OK
YEL043W	YEL043W	-	V:70477-73348	28.0587	21.6546	34.4627	OK	17.9	13.7984	22.0017	OK	21.3686	16.5316	26.2056	OK	14.4589	11.0854	17.8323	OK
YEL044W	YEL044W	IES6	V:69756-70257	66.8057	49.6978	83.9136	OK	54.4819	40.2067	68.757	OK	58.0641	42.9708	73.1574	OK	45.5482	33.2922	57.8041	OK
YEL045C	YEL045C	-	V:68839-69265	0.186753	0	0.931316	OK	0.291249	0	1.03264	OK	0	0	0	OK	0.824437	0	1.99613	OK
YEL046C	YEL046C	GLY1	V:67628-68792	246.851	189.848	303.855	OK	100.569	78.2014	122.938	OK	220.142	169.823	270.462	OK	85.3624	66.3818	104.343	OK
YEL047C	YEL047C	-	V:65384-66797	47.6796	36.8028	58.5563	OK	63.9113	49.617	78.2056	OK	59.7685	46.4042	73.1328	OK	77.7567	60.4806	95.0328	OK
YEL048C	YEL048C	TCA17	V:64708-65167	21.9743	14.6798	29.2688	OK	3.50697	0.858985	6.15495	OK	10.974	6.32155	15.6265	OK	4.09791	1.29403	6.9018	OK
YEL049W	YEL049W	PAU2	V:63727-64090	0	0	0	OK	0.232041	0	0.991421	OK	0.821834	0	2.10535	OK	0	0	0	OK
YEL050C	YEL050C	RML2	V:59548-60851	43.7297	33.6478	53.8115	OK	50.8092	39.2044	62.414	OK	37.9309	29.0754	46.7864	OK	47.0519	36.2663	57.8375	OK
YEL050W-A	YEL050W-A	-	V:59548-60851	0	0	0	OK	2.88567	0	16.6248	OK	0	0	0	OK	0	0	0	OK
YEL051W	YEL051W	VMA8	V:58377-59148	169.903	131.714	208.093	OK	253.416	196.578	310.254	OK	154.263	119.929	188.596	OK	202.415	157.365	247.465	OK
YEL052W	YEL052W	AFG1	V:56570-58100	39.6872	30.6393	48.7351	OK	37.8377	29.2063	46.469	OK	27.2836	20.8842	33.683	OK	30.7959	23.6669	37.9249	OK
YEL053C	YEL053C	MAK10	V:53900-56102	24.0633	18.5553	29.5712	OK	11.4011	8.53155	14.2707	OK	19.0373	14.5903	23.4842	OK	13.8439	10.47	17.2178	OK
YEL053W-A	YEL053W-A	-	V:52720-53255	2.60071	0	16.3645	OK	1.26224	0	5.47853	OK	1.73532	0	9.60959	OK	0.799392	0	2.93037	OK
YEL054C	YEL054C	RPL12A	V:52720-53255	716.963	547.15	886.775	OK	136.303	104.673	167.933	OK	396.563	308.109	485.017	OK	91.572	69.5458	113.598	OK
YEL055C	YEL055C	POL5	V:48470-51539	101.128	77.204	125.052	OK	29.4824	22.9211	36.0437	OK	58.4397	45.285	71.5944	OK	23.711	18.3882	29.0339	OK
YEL056W	YEL056W	HAT2	V:47167-48373	35.0142	26.7654	43.2631	OK	36.6662	28.0841	45.2483	OK	30.5719	23.2321	37.9117	OK	28.8605	21.9016	35.8194	OK
YEL057C	YEL057C	-	V:45019-45721	0.631875	0	1.50858	OK	1.21115	0.0531095	2.36919	OK	2.58212	0.964782	4.19946	OK	1.25424	0.113114	2.39537	OK
YEL058W	YEL058W	PCM1	V:43251-44925	86.5273	67.169	105.886	OK	129.267	99.9276	158.607	OK	110.763	85.8798	135.646	OK	134.43	103.746	165.114	OK
YEL059C-A	YEL059C-A	SOM1	V:42399-42624	3.126	0	8.92712	OK	9.10312	0.392267	17.814	OK	3.98628	0.723841	7.24872	OK	7.93308	0.397716	15.4684	OK
YEL059W	YEL059W	HHY1	V:42651-42960	1.83715	0	4.6198	OK	2.89695	0	6.46377	OK	3.54001	0	7.29812	OK	4.65122	0.619926	8.68251	OK
YEL060C	YEL060C	PRB1	V:40045-41953	40.2783	31.243	49.3137	OK	212.47	161.41	263.53	OK	117.313	90.588	144.037	OK	226.181	171.481	280.88	OK
YEL061C	YEL061C	CIN8	V:36534-39537	68.635	52.8539	84.416	OK	66.7767	51.5362	82.0172	OK	42.4035	32.9598	51.8472	OK	40.985	31.8686	50.1013	OK
YEL062W	YEL062W	NPR2	V:34406-36254	10.4059	7.63852	13.1733	OK	16.2447	12.2661	20.2233	OK	13.7656	10.3064	17.2248	OK	17.2265	13.0435	21.4096	OK
YEL063C	YEL063C	CAN1	V:31693-33466	73.4116	57.0566	89.7667	OK	377.38	281.031	473.73	OK	70.6904	54.9557	86.425	OK	331.869	248.826	414.911	OK
YEL064C	YEL064C	AVT2	V:29796-31239	20.5266	15.425	25.6281	OK	29.2659	22.3921	36.1396	OK	18.3998	13.7847	23.015	OK	26.8805	20.4788	33.2823	OK
YEL065W	YEL065W	SIT1	V:27656-29543	41.5207	32.1185	50.9228	OK	48.0439	37.3307	58.7572	OK	34.066	26.3457	41.7863	OK	62.3524	48.4056	76.2991	OK
YEL066W	YEL066W	HPA3	V:26188-27206	34.4109	24.4829	44.3389	OK	100.397	76.3827	124.411	OK	43.3625	31.0764	55.6487	OK	85.7623	64.717	106.808	OK
YEL067C	YEL067C	-	V:26188-27206	2.39517	0	4.98632	OK	3.34755	0	7.46767	OK	2.57058	0	6.51018	OK	4.71656	0.0894499	9.34367	OK
YEL068C	YEL068C	-	V:25645-25978	7.89544	2.70263	13.0882	OK	12.2974	5.82593	18.7689	OK	9.81157	4.16061	15.4625	OK	9.33363	3.87569	14.7916	OK
YEL069C	YEL069C	HXT13	V:21536-23231	0.380206	0.00358073	0.756831	OK	0.172844	0	0.439018	OK	0.200325	0	0.465327	OK	0.316604	0	0.658455	OK
YEL070W	YEL070W	DSF1	V:19588-21097	0.863165	0.256797	1.46953	OK	1.17014	0.470381	1.86989	OK	2.64014	1.56715	3.71314	OK	3.95091	2.54881	5.35301	OK
YEL071W	YEL071W	DLD3	V:16354-17845	60.1199	46.6196	73.6202	OK	837.592	603.448	1071.74	OK	114.377	88.7338	140.02	OK	620.679	455.644	785.713	OK
YEL072W	YEL072W	RMD6	V:13719-14415	4.47316	2.25661	6.68971	OK	9.84433	6.33098	13.3577	OK	6.88164	4.06322	9.70007	OK	10.7144	7.01395	14.4149	OK
YEL073C	YEL073C	-	V:7229-7553	7.78863	2.51418	13.0631	OK	52.2066	36.3488	68.0644	OK	26.2703	16.3239	36.2167	OK	79.9623	57.813	102.111	OK
YEL074W	YEL074W	-	V:6125-6464	0.828107	0	2.72566	OK	1.36243	0	3.67348	OK	0	0	0	OK	0.418872	0	1.31849	OK
YEL075C	YEL075C	-	V:4184-5713	24.6681	15.4563	33.8799	OK	26.2446	15.937	36.5522	OK	34.5423	22.9618	46.1228	OK	16.047	7.78355	24.3104	OK
YEL075W-A	YEL075W-A	-	V:4184-5713	0.220457	0	0.883483	OK	0.138443	0	0.645167	OK	0.295624	0	1.09968	OK	0.169042	0	0.615515	OK
YEL076C	YEL076C	-	V:4184-5713	1.60339	0.0715859	3.1352	OK	2.11383	0	4.49649	OK	1.96007	0	4.24688	OK	1.08998	0	2.62631	OK
YEL076C-A	YEL076C-A	-	V:4184-5713	0	0	0	OK	0	0	0	OK	0	0	0	OK	0	0	0	OK
YEL077C	YEL077C	-	V:263-4097	24.4413	18.947	29.9357	OK	28.9554	22.4526	35.4582	OK	29.5476	22.9693	36.1259	OK	28.9783	22.4905	35.4661	OK
YEL077W-A	YEL077W-A	-	V:263-4097	0.228473	0	2.04203	OK	0.0731445	0	1.02182	OK	0.5946	0	3.74704	OK	0	0	0	OK
YER001W	YER001W	MNN1	V:153519-155808	97.8042	75.5247	120.084	OK	164.153	125.011	203.294	OK	76.8318	59.5803	94.0832	OK	97.895	75.6507	120.139	OK
YER002W	YER002W	NOP16	V:156802-157498	97.2028	75.0063	119.399	OK	26.4982	19.1831	33.8133	OK	69.5296	53.2109	85.8483	OK	39.465	29.4061	49.5238	OK
YER003C	YER003C	PMI40	V:157735-159118	105.059	81.6764	128.442	OK	149.608	115.939	183.278	OK	97.6397	75.9166	119.363	OK	105.271	81.8487	128.692	OK
YER004W	YER004W	FMP52	V:159579-160275	53.7288	40.4221	67.0355	OK	91.9394	70.7665	113.112	OK	113.842	88.1513	139.533	OK	142.772	110.939	174.605	OK
YER005W	YER005W	YND1	V:160549-162442	52.5863	40.8899	64.2827	OK	40.7009	31.5751	49.8268	OK	38.5682	29.9085	47.2279	OK	38.6088	29.936	47.2816	OK
YER006C-A	YER006C-A	-	V:164343-166083	0.451961	0	1.7132	OK	0	0	0	OK	0	0	0	OK	0	0	0	OK
YER006W	YER006W	NUG1	V:162722-164285	73.0578	56.819	89.2965	OK	4.69787	3.1473	6.24844	OK	50.4863	39.1728	61.7998	OK	13.1701	9.73478	16.6055	OK
YER007C-A	YER007C-A	TMA20	V:166236-166885	64.5468	48.3483	80.7453	OK	37.0648	26.8939	47.2357	OK	50.4927	37.4116	63.5738	OK	33.5035	24.1446	42.8625	OK
YER007W	YER007W	PAC2	V:164343-166083	12.6415	9.30229	15.9806	OK	8.79255	6.30438	11.2807	OK	10.2243	7.41661	13.0319	OK	10.5286	7.6511	13.4061	OK
YER008C	YER008C	SEC3	V:167807-171818	22.1649	17.1521	27.1777	OK	28.0127	21.7474	34.278	OK	21.9163	17.018	26.8146	OK	24.5449	19.0896	30.0002	OK
YER009W	YER009W	NTF2	V:172114-172492	183.848	139.734	227.961	OK	158.484	120.842	196.126	OK	165.153	125.697	204.609	OK	138.041	104.73	171.352	OK
YER010C	YER010C	-	V:172633-173338	11.9954	8.00021	15.9907	OK	26.0521	18.8735	33.2307	OK	18.7745	13.3881	24.1609	OK	20.4835	14.5901	26.3768	OK
YER011W	YER011W	TIR1	V:175247-176012	7.21421	4.46358	9.96485	OK	8.49849	5.414	11.583	OK	15.8108	11.1139	20.5077	OK	11.0715	7.44457	14.6984	OK
YER012W	YER012W	PRE1	V:177834-178431	28.1423	20.1249	36.1598	OK	51.0949	38.1072	64.0826	OK	59.9718	45.1962	74.7474	OK	64.4896	48.7884	80.1908	OK
YER013W	YER013W	PRP22	V:178840-182278	9.07393	6.86716	11.2807	OK	10.1133	7.70353	12.523	OK	7.68366	5.77729	9.59003	OK	7.9443	5.98414	9.90445	OK
YER014C-A	YER014C-A	BUD25	V:182599-186775	0.410483	0	2.18282	OK	0	0	0	OK	0.194061	0	1.18865	OK	0.363758	0	2.09786	OK
YER014W	YER014W	HEM14	V:182599-186775	18.6997	13.395	24.0044	OK	31.2356	23.0523	39.4189	OK	27.8174	20.3731	35.2618	OK	40.104	29.8685	50.3395	OK
YER015W	YER015W	FAA2	V:182599-186775	5.75455	3.20909	8.30001	OK	6.67693	3.38249	9.97138	OK	7.57412	4.29439	10.8538	OK	8.70221	4.69992	12.7045	OK
YER016W	YER016W	BIM1	V:188276-189311	58.7343	45.3385	72.13	OK	60.3586	46.6145	74.1027	OK	43.4082	33.2509	53.5656	OK	46.1271	35.4062	56.8479	OK
YER017C	YER017C	AFG3	V:189502-191788	36.7941	28.5888	44.9994	OK	32.2585	25.0159	39.501	OK	39.1646	30.4302	47.8989	OK	36.0648	28.0211	44.1084	OK
YER018C	YER018C	SPC25	V:191958-192624	20.2773	14.3487	26.2059	OK	17.7976	12.4693	23.1259	OK	8.73913	5.4063	12.072	OK	11.3456	7.42713	15.2641	OK
YER019C-A	YER019C-A	SBH2	V:194272-194539	346.035	262.255	429.815	OK	273.654	207.086	340.223	OK	217.664	163.482	271.847	OK	241.45	181.419	301.481	OK
YER019W	YER019W	ISC1	V:192796-194230	46.6921	35.9809	57.4032	OK	52.2894	40.4825	64.0963	OK	37.6794	29.0314	46.3275	OK	50.1328	38.8668	61.3989	OK
YER020W	YER020W	GPA2	V:195167-196517	31.9387	24.4598	39.4177	OK	58.0513	45.0303	71.0723	OK	32.115	24.608	39.622	OK	48.9103	37.8281	59.9926	OK
YER021W	YER021W	RPN3	V:196947-198519	156.042	120.302	191.781	OK	192.58	147.76	237.4	OK	210.121	160.749	259.493	OK	215.26	164.483	266.037	OK
YER022W	YER022W	SRB4	V:198811-200875	44.6237	34.6569	54.5906	OK	43.3469	33.651	53.0428	OK	40.327	31.3321	49.3218	OK	38.1353	29.5998	46.6709	OK
YER023C-A	YER023C-A	-	V:201075-201936	0	0	0	OK	0.736529	0	3.95622	OK	0	0	0	OK	0	0	0	OK
YER023W	YER023W	PRO3	V:201075-201936	70.1318	53.8126	86.451	OK	142.175	110.203	174.147	OK	89.3866	69.2002	109.573	OK	119.97	93.2116	146.728	OK
YER024W	YER024W	YAT2	V:202191-204963	13.4117	10.2333	16.5901	OK	96.8023	74.4109	119.194	OK	20.1296	15.5442	24.7151	OK	62.8749	48.7572	76.9926	OK
YER025W	YER025W	GCD11	V:205250-206834	187.194	143.754	230.635	OK	71.4348	55.5488	87.3208	OK	128.353	99.3971	157.309	OK	68.2181	52.9681	83.468	OK
YER026C	YER026C	CHO1	V:207643-208474	88.9283	67.758	110.099	OK	148.283	115.143	181.423	OK	103.606	80.3713	126.841	OK	144.349	112.223	176.475	OK
YER027C	YER027C	GAL83	V:208978-210232	21.9779	16.4528	27.5031	OK	30.0497	22.8666	37.2328	OK	25.0557	18.9192	31.1923	OK	21.9452	16.4141	27.4763	OK
YER028C	YER028C	MIG3	V:210691-211876	5.285	3.42524	7.14475	OK	3.91051	2.36432	5.4567	OK	4.93956	3.15182	6.72731	OK	3.05067	1.73363	4.3677	OK
YER029C	YER029C	SMB1	V:212586-213177	35.2728	25.6254	44.9202	OK	26.7571	19.036	34.4783	OK	28.2588	20.1587	36.3589	OK	20.4678	14.3409	26.5946	OK
YER030W	YER030W	CHZ1	V:213436-213898	169.123	130.504	207.742	OK	300.701	233.626	367.777	OK	196.427	151.985	240.869	OK	279.884	217.649	342.119	OK
YER031C	YER031C	YPT31	V:214075-214747	58.615	44.44	72.7899	OK	69.3582	52.9746	85.7417	OK	55.9995	42.3823	69.6166	OK	66.2653	50.5272	82.0035	OK
YER032W	YER032W	FIR1	V:215062-217693	5.09197	3.65261	6.53132	OK	4.85195	3.44614	6.25776	OK	7.79532	5.76471	9.82593	OK	6.0402	4.36944	7.71096	OK
YER033C	YER033C	ZRG8	V:218056-221287	12.1038	9.20276	15.0047	OK	21.0647	16.3096	25.8198	OK	16.0712	12.3844	19.758	OK	18.1506	14.0333	22.2679	OK
YER034W	YER034W	-	V:221845-222403	7.06537	3.81422	10.3165	OK	6.61636	3.50956	9.72316	OK	9.53659	5.7728	13.3004	OK	9.7546	5.8671	13.6421	OK
YER035W	YER035W	EDC2	V:222638-223076	30.0601	20.8565	39.2638	OK	62.2112	45.7267	78.6958	OK	37.9056	26.9029	48.9083	OK	43.9966	31.5148	56.4783	OK
YER036C	YER036C	ARB1	V:223366-225199	236.941	179.638	294.244	OK	73.6325	57.2558	90.0092	OK	124.759	96.3577	153.16	OK	57.7312	44.8654	70.5971	OK
YER037W	YER037W	PHM8	V:225888-226854	64.0614	49.4105	78.7123	OK	188.67	146.38	230.959	OK	119.754	93.1331	146.375	OK	187.087	145.173	229.001	OK
YER038C	YER038C	KRE29	V:226857-228252	18.1138	13.5273	22.7004	OK	7.15022	4.99608	9.30436	OK	12.836	9.38786	16.2842	OK	6.68892	4.63462	8.74322	OK
YER038W-A	YER038W-A	-	V:228450-229205	4.48442	0.40319	8.56564	OK	1.1822	0	3.69649	OK	2.22246	0	4.7971	OK	1.48267	0	3.67937	OK
YER039C	YER039C	HVG1	V:228450-229205	4.68469	2.38954	6.97984	OK	10.0642	6.53958	13.5888	OK	4.12606	2.10069	6.15143	OK	7.79311	4.71054	10.8757	OK
YER039C-A	YER039C-A	-	V:229262-229481	5.14847	0	12.3581	OK	16.3988	4.66139	28.1361	OK	5.18927	0	11.8676	OK	16.0455	4.61528	27.4758	OK
YER040W	YER040W	GLN3	V:229794-231987	5.41395	3.84116	6.98673	OK	9.87154	7.3155	12.4276	OK	6.77118	4.89714	8.64523	OK	9.15868	6.77218	11.5452	OK
YER041W	YER041W	YEN1	V:232460-234740	20.3291	15.6303	25.028	OK	23.9431	18.4808	29.4054	OK	19.2326	14.7639	23.7013	OK	24.7296	19.082	30.3772	OK
YER042W	YER042W	MXR1	V:234936-235491	29.755	21.1341	38.3759	OK	24.9458	17.6659	32.2258	OK	47.0644	34.6555	59.4733	OK	38.2843	27.8495	48.7192	OK
YER043C	YER043C	SAH1	V:235769-237119	183.056	141.303	224.81	OK	114.075	88.6213	139.529	OK	144.663	112.026	177.3	OK	75.2509	58.5163	91.9855	OK
YER044C	YER044C	ERG28	V:237569-238016	19.4298	12.5967	26.263	OK	41.6549	29.799	53.5108	OK	24.6229	16.741	32.5048	OK	38.5484	27.517	49.5798	OK
YER044C-A	YER044C-A	MEI4	V:238459-239774	4.12296	2.55591	5.69002	OK	3.38096	1.99844	4.76347	OK	4.53354	2.84273	6.22435	OK	4.51191	2.84591	6.17792	OK
YER045C	YER045C	ACA1	V:240031-241501	6.95739	4.82559	9.08919	OK	6.09298	4.20339	7.98258	OK	9.60241	6.90059	12.3042	OK	10.2296	7.3756	13.0835	OK
YER046W	YER046W	SPO73	V:243179-243611	9.78997	5.17995	14.4	OK	11.3092	6.32771	16.2907	OK	12.7815	7.42825	18.1348	OK	13.7117	8.24328	19.1802	OK
YER046W-A	YER046W-A	-	V:243699-246503	1.17906	0	5.41511	OK	0.719358	0	3.3126	OK	0.458009	0	2.15557	OK	0	0	0	OK
YER047C	YER047C	SAP1	V:243699-246503	17.1225	13.1102	21.1348	OK	19.5046	15.029	23.9801	OK	15.4206	11.8184	19.0228	OK	17.4265	13.3736	21.4793	OK
YER048C	YER048C	CAJ1	V:246981-248157	58.3379	45.0499	71.6259	OK	99.5645	77.4191	121.71	OK	75.194	58.4184	91.9696	OK	85.8853	66.7739	104.997	OK
YER048W-A	YER048W-A	ISD11	V:250717-251002	82.2056	57.864	106.547	OK	91.6775	65.257	118.098	OK	100.231	72.2383	128.223	OK	101.235	73.0408	129.429	OK
YER049W	YER049W	TPA1	V:251727-253662	132.673	102.19	163.156	OK	39.1673	30.3847	47.95	OK	82.4398	63.9573	100.922	OK	42.7474	33.2082	52.2866	OK
YER050C	YER050C	RSM18	V:253970-254387	54.8237	39.6698	69.9775	OK	85.6173	63.7842	107.45	OK	55.6817	40.4218	70.9416	OK	67.4004	49.624	85.1769	OK
YER051W	YER051W	JHD1	V:254655-256134	23.2438	17.6361	28.8516	OK	23.9452	18.1943	29.6962	OK	23.0894	17.5167	28.6622	OK	28.0149	21.4366	34.5931	OK
YER052C	YER052C	HOM3	V:256374-257958	36.9054	28.4681	45.3427	OK	38.5951	29.8118	47.3785	OK	55.8329	43.363	68.3028	OK	36.6898	28.3368	45.0429	OK
YER053C	YER053C	PIC2	V:258736-259639	93.3953	72.3589	114.432	OK	84.7316	65.6169	103.846	OK	171.248	133.095	209.401	OK	133.206	103.596	162.817	OK
YER053C-A	YER053C-A	-	V:260932-261046	28.6141	22.7002	34.5279	OK	25.7641	19.8896	31.6385	OK	0	0	0	OK	0	0	0	OK
YER054C	YER054C	GIP2	V:262051-263698	2.83929	1.73952	3.93906	OK	6.51518	4.58509	8.44527	OK	10.9447	8.01979	13.8696	OK	13.9824	10.4047	17.5601	OK
YER055C	YER055C	HIS1	V:264891-265785	183.48	141.607	225.353	OK	109.376	84.9009	133.852	OK	114.627	89.0673	140.187	OK	83.9572	65.0348	102.88	OK
YER056C	YER056C	FCY2	V:266511-268113	286.06	215.6	356.52	OK	411.78	307.084	516.477	OK	186.503	143.118	229.889	OK	356.345	267.699	444.991	OK
YER056C-A	YER056C-A	RPL34A	V:269422-270185	121.577	91.2071	151.947	OK	54.601	38.8528	70.3492	OK	165.686	126.274	205.097	OK	65.306	47.2538	83.3582	OK
YER057C	YER057C	HMF1	V:270736-271126	16.8477	10.0816	23.6139	OK	26.4679	17.4623	35.4736	OK	28.9543	19.3644	38.5441	OK	27.0519	17.9987	36.1052	OK
YER058W	YER058W	PET117	V:271767-272091	5.72959	1.3184	10.1408	OK	19.9972	11.3971	28.5973	OK	3.76495	0.0569496	7.47296	OK	13.8661	7.02446	20.7077	OK
YER059W	YER059W	PCL6	V:272623-273886	7.0293	4.82573	9.23287	OK	11.523	8.27418	14.7718	OK	7.12442	4.90261	9.34624	OK	9.99741	7.09525	12.8996	OK
YER060W	YER060W	FCY21	V:274566-276153	21.1174	15.9622	26.2726	OK	29.283	22.4596	36.1064	OK	15.9963	11.9621	20.0306	OK	15.8121	11.8216	19.8025	OK
YER060W-A	YER060W-A	FCY22	V:276571-278164	3.25177	2.03215	4.47138	OK	2.10214	1.17074	3.03355	OK	1.79885	0.94734	2.65037	OK	1.60687	0.804727	2.40902	OK
YER061C	YER061C	CEM1	V:278297-279626	36.0414	27.6029	44.48	OK	31.6791	24.2084	39.1498	OK	22.2844	16.7884	27.7803	OK	28.4412	21.6737	35.2087	OK
YER062C	YER062C	HOR2	V:279929-280682	40.5818	30.4233	50.7402	OK	120.386	93.3594	147.413	OK	70.0787	53.7839	86.3734	OK	75.5998	58.2053	92.9943	OK
YER063W	YER063W	THO1	V:281709-282366	37.1813	27.4456	46.9171	OK	66.5303	50.6362	82.4244	OK	34.7955	25.5975	43.9935	OK	42.8494	31.9353	53.7635	OK
YER064C	YER064C	-	V:282704-284222	31.5683	24.1953	38.9412	OK	8.0718	5.74083	10.4028	OK	21.3391	16.1604	26.5177	OK	13.5621	10.0258	17.0984	OK
YER065C	YER065C	ICL1	V:285240-286914	12.9287	9.57784	16.2796	OK	15.5604	11.6526	19.4682	OK	11.8829	8.74967	15.0162	OK	15.3834	11.5209	19.2459	OK
YER066C-A	YER066C-A	-	V:291702-292563	0.49458	0	1.70834	OK	0.437922	0	1.5031	OK	0.391353	0	1.4503	OK	0.22346	0	1.0101	OK
YER066W	YER066W	RRT13	V:290241-290799	5.30978	2.49959	8.11996	OK	7.09429	3.83391	10.3547	OK	8.85924	5.18839	12.5301	OK	7.09351	3.8462	10.3408	OK
YER067C-A	YER067C-A	-	V:291702-292563	1.05128	0	3.12009	OK	1.55854	0	4.50595	OK	0.679147	0	2.5457	OK	0.910211	0	2.93806	OK
YER067W	YER067W	RGI1	V:291702-292563	6.5292	3.0889	9.9695	OK	21.3192	14.2789	28.3594	OK	34.9297	24.9484	44.9111	OK	45.8805	33.3692	58.3917	OK
YER068C-A	YER068C-A	-	V:295300-298001	0.353724	0	2.14246	OK	1.26968	0	6.61302	OK	0	0	0	OK	1.20982	0	6.57142	OK
YER068W	YER068W	MOT2	V:293049-294813	15.9802	11.9835	19.9769	OK	14.7357	11.039	18.4324	OK	14.4837	10.8318	18.1355	OK	13.378	9.96529	16.7906	OK
YER069W	YER069W	ARG5,6	V:295300-298001	25.5802	19.8057	31.3547	OK	48.8028	37.93	59.6755	OK	95.8649	73.7884	117.941	OK	89.776	69.1956	110.356	OK
YER070W	YER070W	RNR1	V:298949-301616	120.967	92.3903	149.544	OK	105.285	80.831	129.738	OK	66.5891	51.536	81.6423	OK	58.562	45.4718	71.6522	OK
YER071C	YER071C	TDA2	V:301946-302327	32.5494	22.0118	43.0869	OK	39.1356	27.2303	51.0409	OK	28.2652	18.8053	37.725	OK	44.2033	31.0941	57.3124	OK
YER072W	YER072W	VTC1	V:302805-303195	143.937	109.484	178.39	OK	99.7684	74.5741	124.963	OK	143.736	109.5	177.971	OK	93.1878	69.49	116.886	OK
YER073W	YER073W	ALD5	V:304029-305592	199.134	152.685	245.582	OK	46.1841	35.8057	56.5625	OK	228.36	174.292	282.429	OK	72.0114	55.986	88.0368	OK
YER074W	YER074W	RPS24A	V:306322-307196	1389.87	1042.41	1737.34	OK	556.164	431.043	681.285	OK	823.195	636.282	1010.11	OK	445.302	346.193	544.411	OK
YER074W-A	YER074W-A	YOS1	V:307652-308123	96.3063	67.2813	125.331	OK	87.6988	61.2276	114.17	OK	84.2748	58.9609	109.589	OK	91.0569	64.4508	117.663	OK
YER075C	YER075C	PTP3	V:308412-311199	10.3084	7.74894	12.8678	OK	6.39621	4.69701	8.09542	OK	6.93392	5.11829	8.74955	OK	6.54714	4.81343	8.28084	OK
YER076C	YER076C	-	V:312589-313737	18.36	13.2304	23.4896	OK	18.8294	13.6184	24.0404	OK	16.9784	12.1886	21.7682	OK	20.338	14.8338	25.8423	OK
YER076W-A	YER076W-A	-	V:312589-313737	0.67004	0	3.11786	OK	0.661359	0	2.35851	OK	0.723561	0	2.6378	OK	0	0	0	OK
YER077C	YER077C	-	V:314533-316600	19.1296	14.6057	23.6535	OK	14.3675	10.8469	17.888	OK	17.0009	12.9377	21.0642	OK	16.6032	12.6254	20.5809	OK
YER078C	YER078C	ICP55	V:316806-318342	23.0156	17.4979	28.5334	OK	33.3026	25.6428	40.9625	OK	18.7478	14.1149	23.3806	OK	29.1261	22.3359	35.9164	OK
YER078W-A	YER078W-A	-	V:318645-318810	0	0	0	OK	1.25526	0	3.23945	OK	2.89015	0.914671	4.86563	OK	0	0	0	OK
YER079C-A	YER079C-A	-	V:319901-321846	0.144711	0	1.57714	OK	0.55248	0	3.53729	OK	0	0	0	OK	0.418872	0	3.11773	OK
YER079W	YER079W	-	V:318919-319552	3.8126	1.67274	5.95247	OK	14.6077	9.84351	19.3718	OK	9.84057	6.13199	13.5492	OK	15.4863	10.5484	20.4242	OK
YER080W	YER080W	AIM9	V:319901-321846	48.4276	37.5733	59.2819	OK	80.2456	62.3157	98.1756	OK	50.0651	38.9148	61.2155	OK	65.2244	50.6995	79.7493	OK
YER081W	YER081W	SER3	V:322211-324095	44.6591	21.3347	67.9835	OK	31.0247	15.995	46.0545	OK	82.8671	60.0828	105.651	OK	68.7663	42.5589	94.9736	OK
YER082C	YER082C	UTP7	V:324271-325936	7.80335	5.56075	10.0459	OK	1.16949	0.504465	1.83452	OK	5.9818	4.19578	7.76781	OK	2.04541	1.14971	2.94111	OK
YER083C	YER083C	GET2	V:326173-327031	45.8412	34.8368	56.8455	OK	59.2775	45.5197	73.0353	OK	46.5871	35.4659	57.7083	OK	54.2846	41.5853	66.984	OK
YER084W	YER084W	-	V:327064-327451	0.764728	0	1.96473	OK	0.382429	0	1.43609	OK	0.946758	0	2.39383	OK	1.62933	0	3.66707	OK
YER084W-A	YER084W-A	-	V:327597-328140	0.210228	0	0.794268	OK	0.0926547	0	0.606762	OK	0.222215	0	0.94581	OK	0	0	0	OK
YER085C	YER085C	-	V:327597-328140	0.744379	0	1.88678	OK	0.553408	0	1.48948	OK	0.855337	0	2.14709	OK	1.0294	0	2.31696	OK
YER086W	YER086W	ILV1	V:328476-330207	56.6013	43.9935	69.2091	OK	34.8444	26.9251	42.7637	OK	52.0398	40.356	63.7236	OK	40.5949	31.4556	49.7343	OK
YER087C-A	YER087C-A	-	V:330575-332368	0.693222	0	2.5185	OK	0.644263	0	2.8334	OK	0.821933	0	2.71165	OK	0.280986	0	1.39151	OK
YER087C-B	YER087C-B	SBH1	V:332581-332830	19.7525	8.71444	30.7905	OK	25.08	12.5708	37.5891	OK	30.2779	16.6878	43.8679	OK	29.5493	16.164	42.9346	OK
YER087W	YER087W	AIM10	V:330575-332368	19.902	15.1043	24.6996	OK	35.4486	27.3841	43.5132	OK	19.6831	14.9202	24.446	OK	29.6003	22.7972	36.4035	OK
YER088C	YER088C	DOT6	V:333175-335188	30.7792	23.7712	37.7871	OK	22.4003	17.1173	27.6832	OK	29.1352	22.4824	35.788	OK	22.7385	17.4478	28.0293	OK
YER088C-A	YER088C-A	-	V:335695-337340	25.6496	0	54.58	OK	22.681	0	51.3287	OK	21.6031	0	45.9585	OK	26.3668	0	53.9371	OK
YER088W-B	YER088W-B	-	V:335695-337340	3.0834	0	11.9176	OK	1.85709	0	5.79981	OK	4.76729	0	10.7799	OK	10.3015	0	63.4133	OK
YER089C	YER089C	PTC2	V:335695-337340	73.4903	56.7738	90.2068	OK	78.8585	60.8239	96.8931	OK	72.3373	55.7787	88.8959	OK	75.8158	58.5581	93.0734	OK
YER090C-A	YER090C-A	-	V:337948-339472	0	0	0	OK	0	0	0	OK	0	0	0	OK	0	0	0	OK
YER090W	YER090W	TRP2	V:337948-339472	49.5357	38.4201	60.6512	OK	48.5458	37.6161	59.4755	OK	65.8375	51.1955	80.4795	OK	58.405	45.3998	71.4101	OK
YER091C	YER091C	MET6	V:339863-342167	92.8488	71.7104	113.987	OK	97.204	75.0464	119.362	OK	77.4937	60.0641	94.9234	OK	67.4606	52.3806	82.5407	OK
YER091C-A	YER091C-A	-	V:342389-342611	0	0	0	OK	0	0	0	OK	0	0	0	OK	1.50812	0	3.7583	OK
YER092W	YER092W	IES5	V:342854-343232	59.1762	42.1375	76.215	OK	46.2993	32.5898	60.0089	OK	53.1553	37.9185	68.3921	OK	61.0083	44.1186	77.8981	OK
YER093C	YER093C	TSC11	V:343319-347612	43.9685	33.903	54.0339	OK	38.6216	29.9409	47.3024	OK	37.0526	28.7484	45.3569	OK	38.7448	30.0487	47.4409	OK
YER093C-A	YER093C-A	AIM11	V:347911-348400	5.52767	1.99374	9.0616	OK	7.6271	3.41799	11.8362	OK	7.31123	3.29046	11.332	OK	8.32774	4.04582	12.6097	OK
YER094C	YER094C	PUP3	V:348728-349346	114.85	88.0903	141.609	OK	162.581	126.002	199.159	OK	177.838	138.003	217.673	OK	194.985	151.624	238.346	OK
YER095W	YER095W	RAD51	V:349979-351182	29.7063	22.4955	36.9172	OK	38.1744	29.2371	47.1117	OK	48.9504	37.7802	60.1206	OK	46.9578	36.1945	57.7212	OK
YER096W	YER096W	SHC1	V:351697-353236	2.46194	1.43462	3.48926	OK	1.65246	0.814142	2.49077	OK	3.77362	2.42014	5.12711	OK	4.30955	2.846	5.7731	OK
YER097W	YER097W	-	V:355139-357730	13.2857	0	27.4647	OK	15.8671	0	34.1378	OK	13.5409	0	29.4872	OK	10.4169	0	26.7552	OK
YER098W	YER098W	UBP9	V:355139-357730	13.7926	10.3329	17.2522	OK	29.2163	22.5018	35.9307	OK	22.5554	17.2647	27.8461	OK	30.125	23.1852	37.0648	OK
YER099C	YER099C	PRS2	V:358104-359061	36.1045	27.2255	44.9834	OK	21.8942	16.108	27.6803	OK	36.4537	27.5706	45.3367	OK	30.8444	23.17	38.5188	OK
YER100W	YER100W	UBC6	V:359561-360314	39.7755	29.7281	49.8229	OK	51.0073	38.6537	63.3609	OK	38.5686	28.8559	48.2814	OK	57.197	43.5797	70.8142	OK
YER101C	YER101C	AST2	V:360501-361794	8.16086	5.73741	10.5843	OK	10.5774	7.57497	13.5798	OK	9.35367	6.64435	12.063	OK	11.5014	8.28839	14.7144	OK
YER102W	YER102W	RPS8B	V:363099-363702	501.022	385.5	616.544	OK	170.476	132.309	208.643	OK	300.901	233.874	367.929	OK	137.032	106.123	167.94	OK
YER103W	YER103W	SSA4	V:364588-366517	45.7261	35.5195	55.9328	OK	126.244	97.3523	155.135	OK	99.259	76.9675	121.551	OK	132.177	101.816	162.539	OK
YER104W	YER104W	RTT105	V:366801-367428	13.5438	9.01445	18.0731	OK	12.7208	8.34477	17.0969	OK	14.636	9.87961	19.3923	OK	15.3939	10.494	20.2937	OK
YER105C	YER105C	NUP157	V:367837-372013	86.8182	65.9776	107.659	OK	53.1318	41.0326	65.2311	OK	55.814	43.01	68.6181	OK	42.9424	33.2994	52.5854	OK
YER106W	YER106W	MAM1	V:372325-373234	1.21142	0.262501	2.16034	OK	1.43927	0.391326	2.4872	OK	3.8062	2.07744	5.53495	OK	4.91971	2.93262	6.90679	OK
YER107C	YER107C	GLE2	V:373447-374714	48.0469	36.9331	59.1607	OK	35.7931	27.2629	44.3233	OK	40.8689	31.3003	50.4375	OK	32.2726	24.4672	40.0781	OK
YER107W-A	YER107W-A	-	V:373447-374714	0.459673	0	3.43892	OK	0.870435	0	4.1799	OK	0.482713	0	2.23675	OK	0.926173	0	3.29055	OK
YER109C	YER109C	FLO8	V:375214-377614	22.4186	17.2423	27.5949	OK	21.242	16.3717	26.1123	OK	14.2141	10.8072	17.621	OK	14.9885	11.4272	18.5498	OK
YER110C	YER110C	KAP123	V:378761-382103	135.911	102.693	169.13	OK	46.0756	35.7283	56.423	OK	104.654	79.7618	129.545	OK	52.2547	40.5182	63.9912	OK
YER111C	YER111C	SWI4	V:382594-385876	20.9393	16.0431	25.8354	OK	23.4712	18.2055	28.7369	OK	17.9356	13.8506	22.0207	OK	18.8902	14.6123	23.1681	OK
YER112W	YER112W	LSM4	V:387231-387795	55.7985	41.6603	69.9368	OK	62.6334	47.0852	78.1815	OK	44.1937	32.5535	55.834	OK	47.9944	35.5964	60.3924	OK
YER113C	YER113C	TMN3	V:387931-390052	65.0675	50.5762	79.5588	OK	35.9139	27.8616	43.9663	OK	50.5872	39.3403	61.8341	OK	33.1483	25.6936	40.603	OK
YER114C	YER114C	BOI2	V:390589-393712	35.5544	27.5214	43.5873	OK	24.6467	19.1266	30.1669	OK	25.4894	19.7992	31.1795	OK	21.0943	16.348	25.8406	OK
YER115C	YER115C	SPR6	V:394291-394867	34.0594	24.681	43.4379	OK	20.9511	14.61	27.2922	OK	23.1481	16.2817	30.0144	OK	20.7326	14.4865	26.9786	OK
YER116C	YER116C	SLX8	V:395347-396172	30.9826	23.0329	38.9324	OK	34.6708	25.9393	43.4022	OK	35.4445	26.5466	44.3424	OK	44.945	34.0811	55.809	OK
YER117W	YER117W	RPL23B	V:396768-397653	1974.15	1455.63	2492.67	OK	582.172	449.906	714.437	OK	984.805	756.987	1212.62	OK	445.019	345.416	544.623	OK
YER118C	YER118C	SHO1	V:397951-399055	33.3145	25.3194	41.3097	OK	18.0957	13.2928	22.8986	OK	25.7519	19.3224	32.1814	OK	15.4293	11.2161	19.6425	OK
YER119C	YER119C	AVT6	V:399495-400842	19.4946	14.5665	24.4227	OK	80.6323	62.6797	98.585	OK	27.4108	20.8691	33.9524	OK	73.0352	56.7928	89.2776	OK
YER119C-A	YER119C-A	-	V:400866-401869	0.227444	0	1.77948	OK	0.53328	0	2.72	OK	0	0	0	OK	1.93874	0	7.28097	OK
YER120W	YER120W	SCS2	V:400866-401869	81.0618	62.3692	99.7543	OK	89.4996	68.9844	110.015	OK	68.6096	52.6116	84.6075	OK	72.1384	55.2619	89.0148	OK
YER121W	YER121W	-	V:402374-402719	3.85591	0.42025	7.29157	OK	20.2394	11.9689	28.5098	OK	11.8209	5.83112	17.8107	OK	39.665	27.1865	52.1435	OK
YER122C	YER122C	GLO3	V:402870-404352	125.253	97.1312	153.374	OK	126.271	97.9179	154.624	OK	105.16	81.7033	128.617	OK	97.7824	76.0519	119.513	OK
YER123W	YER123W	YCK3	V:404812-406387	53.507	41.5056	65.5084	OK	48.4647	37.5861	59.3433	OK	48.8872	37.9228	59.8516	OK	45.94	35.6061	56.274	OK
YER124C	YER124C	DSE1	V:407341-409063	269.431	203.908	334.954	OK	253.646	192.298	314.993	OK	89.708	69.6686	109.747	OK	135.815	104.887	166.742	OK
YER125W	YER125W	RSP5	V:410188-412618	192.759	145.632	239.886	OK	168.933	128.181	209.685	OK	155.893	118.666	193.121	OK	137.082	104.709	169.454	OK
YER126C	YER126C	NSA2	V:413393-414179	107.871	83.6589	132.083	OK	7.75665	4.88355	10.6297	OK	48.4153	36.7474	60.0832	OK	10.5395	7.07372	14.0054	OK
YER127W	YER127W	LCP5	V:414480-415554	28.6396	21.5316	35.7476	OK	5.46969	3.46635	7.47303	OK	14.6753	10.6	18.7505	OK	8.80539	6.09208	11.5187	OK
YER128W	YER128W	VFA1	V:415858-416470	5.47607	2.84255	8.1096	OK	6.41107	3.49741	9.32473	OK	5.5857	2.89449	8.27692	OK	7.77185	4.5875	10.9562	OK
YER129W	YER129W	SAK1	V:417280-420709	67.3011	51.6737	82.9286	OK	42.022	32.6345	51.4094	OK	54.4704	42.181	66.7598	OK	45.2039	35.0966	55.3111	OK
YER130C	YER130C	-	V:421114-422446	173.348	133.954	212.741	OK	127.364	98.8696	155.858	OK	117.241	91.1287	143.352	OK	79.0623	61.4784	96.6461	OK
YER131W	YER131W	RPS26B	V:423951-424311	563.504	437.598	689.41	OK	105.572	78.5182	132.626	OK	333.989	258.448	409.531	OK	77.8342	56.8757	98.7927	OK
YER132C	YER132C	PMD1	V:425187-430449	31.7164	24.4637	38.9691	OK	17.0559	13.2395	20.8724	OK	21.8108	16.9568	26.6649	OK	17.675	13.7444	21.6056	OK
YER133W	YER133W	GLC7	V:432494-433958	246.586	190.745	302.427	OK	285.09	219.923	350.257	OK	253.483	195.952	311.015	OK	274	211.501	336.5	OK
YER133W-A	YER133W-A	-	V:437190-437803	1.73469	0	4.75705	OK	2.65582	0	6.36847	OK	1.34116	0	3.87866	OK	4.03415	0	8.64681	OK
YER134C	YER134C	-	V:437190-437803	19.4241	13.1538	25.6944	OK	28.8164	20.3663	37.2664	OK	16.4124	10.8639	21.961	OK	24.1384	16.8314	31.4455	OK
YER135C	YER135C	-	V:437951-438344	0.415814	0	1.24605	OK	0.823607	0	1.99289	OK	0.570493	0	1.72557	OK	1.58841	0	3.57498	OK
YER136W	YER136W	GDI1	V:439615-440971	79.9081	62.1142	97.7021	OK	154.35	119.379	189.321	OK	84.4292	65.6641	103.194	OK	118.659	92.1798	145.139	OK
YER137C	YER137C	-	V:441372-441880	2.31433	0.106143	4.52252	OK	0.882861	0	2.32413	OK	1.17279	0	2.7076	OK	0.794589	0	2.06973	OK
YER137C-A	YER137C-A	-	V:443755-449024	0	0	0	OK	0.0137258	0	0.207457	OK	0.00389509	0	0.188924	OK	0.0657993	0	0.333035	OK
YER137W-A	YER137W-A	-	V:441372-441880	0.339282	0	1.52887	OK	0	0	0	OK	0.365558	0	1.28867	OK	1.24178	0	4.71394	OK
YER138C	YER138C	-	V:443755-449024	0.101262	0	0.2043	OK	0.113491	0.000636547	0.226345	OK	0.146309	0.0161683	0.276449	OK	0.0585391	0	0.150541	OK
YER138W-A	YER138W-A	-	V:449473-449578	0	0	0	OK	0	0	0	OK	0	0	0	OK	0	0	0	OK
YER139C	YER139C	RTR1	V:450562-451243	16.2948	11.325	21.2646	OK	25.9935	18.77	33.217	OK	19.6943	14.0429	25.3458	OK	29.6067	21.6006	37.6128	OK
YER140W	YER140W	-	V:451564-453235	28.4472	21.8642	35.0302	OK	19.7619	14.9854	24.5384	OK	23.3757	17.8521	28.8994	OK	19.9022	15.0978	24.7066	OK
YER141W	YER141W	COX15	V:453458-454919	51.8804	40.1159	63.6448	OK	99.2823	77.1428	121.422	OK	55.1369	42.751	67.5228	OK	74.329	57.7493	90.9086	OK
YER142C	YER142C	MAG1	V:455145-456036	7.36221	4.74879	9.97562	OK	22.6742	16.6165	28.7318	OK	22.5202	16.5099	28.5305	OK	33.0807	24.8276	41.3339	OK
YER143W	YER143W	DDI1	V:456318-457605	22.6744	17.0556	28.2933	OK	43.1315	33.2606	53.0023	OK	35.3049	27.0624	43.5474	OK	44.7894	34.5687	55.0102	OK
YER144C	YER144C	UBP5	V:457805-460223	36.0707	27.9628	44.1787	OK	35.8621	27.8571	43.8671	OK	45.571	35.4349	55.707	OK	47.7994	37.1619	58.4368	OK
YER145C	YER145C	FTR1	V:460525-461740	101.461	78.6103	124.312	OK	44.5611	34.271	54.8512	OK	39.2768	30.1309	48.4227	OK	22.8223	17.1133	28.5314	OK
YER145C-A	YER145C-A	-	V:462385-462866	0.0855861	0	0.699619	OK	0.529205	0	2.05899	OK	1.36636	0	3.63405	OK	1.0627	0	2.93087	OK
YER146W	YER146W	LSM5	V:462385-462866	81.5428	56.7148	106.371	OK	75.4483	52.9382	97.9583	OK	63.7952	43.8888	83.7016	OK	63.8582	44.0643	83.6522	OK
YER147C	YER147C	SCC4	V:462967-464842	3.48616	2.2948	4.67752	OK	3.40719	2.24044	4.57393	OK	4.77454	3.30581	6.24328	OK	4.96322	3.44531	6.48112	OK
YER147C-A	YER147C-A	-	V:465202-466025	5.59434	0	13.9276	OK	4.7453	0	12.6615	OK	3.4383	0	9.80979	OK	1.77902	0	5.4734	OK
YER148W	YER148W	SPT15	V:465202-466025	103.62	79.9447	127.296	OK	79.5597	61.0206	98.0988	OK	78.3653	60.1621	96.5684	OK	58.9863	44.8841	73.0885	OK
YER148W-A	YER148W-A	-	V:466184-467470	0.704453	0	2.35789	OK	0.349234	0	1.48447	OK	0.263202	0	1.26864	OK	0.263016	0	1.18675	OK
YER149C	YER149C	PEA2	V:466184-467470	20.463	15.267	25.659	OK	16.2535	11.9763	20.5306	OK	18.278	13.5672	22.9888	OK	12.9882	9.4024	16.5741	OK
YER150W	YER150W	SPI1	V:468369-468816	10.1309	5.52506	14.7367	OK	20.3435	13.3319	27.355	OK	38.0999	27.1593	49.0405	OK	36.7831	26.1642	47.402	OK
YER151C	YER151C	UBP3	V:469685-472424	34.1152	26.29	41.9405	OK	30.187	23.4281	36.9459	OK	30.3133	23.5402	37.0864	OK	26.0575	20.2091	31.906	OK
YER152C	YER152C	-	V:472656-474805	48.5182	36.9159	60.1205	OK	102.749	79.1042	126.393	OK	52.7683	40.2308	65.3058	OK	87.5245	67.2756	107.773	OK
YER152W-A	YER152W-A	-	V:472656-474805	0.47657	0	2.41916	OK	0.827986	0	4.43133	OK	0.463621	0	2.22847	OK	0.458278	0	2.95686	OK
YER153C	YER153C	PET122	V:472656-474805	11.5557	3.0412	20.0701	OK	12.8193	0.335187	25.3035	OK	8.97349	0.610767	17.3362	OK	12.0403	0	24.2749	OK
YER154W	YER154W	OXA1	V:475019-476228	22.2293	16.6313	27.8273	OK	20.6436	15.3912	25.896	OK	22.8427	17.112	28.5734	OK	21.4978	16.0463	26.9493	OK
YER155C	YER155C	BEM2	V:476344-482848	97.8044	71.7065	123.902	OK	84.6999	63.2948	106.105	OK	79.6045	59.8234	99.3856	OK	74.7806	56.401	93.1601	OK
YER156C	YER156C	-	V:483324-484341	37.9856	28.8841	47.0872	OK	17.6167	12.8105	22.4229	OK	31.0808	23.4402	38.7214	OK	17.8243	12.9992	22.6494	OK
YER157W	YER157W	COG3	V:484787-487193	40.232	31.283	49.181	OK	43.1195	33.5339	52.7051	OK	32.1829	24.9762	39.3896	OK	34.3938	26.7036	42.0841	OK
YER158C	YER158C	-	V:488856-490578	5.00939	3.43923	6.57956	OK	6.4123	4.52404	8.30057	OK	8.14593	5.84589	10.446	OK	6.44239	4.52832	8.35646	OK
YER158W-A	YER158W-A	-	V:491486-491958	7.41889	0	22.1394	OK	8.32031	0	24.8072	OK	7.04643	0	20.035	OK	3.35009	0	7.76974	OK
YER159C	YER159C	BUR6	V:491486-491958	80.7481	59.9425	101.554	OK	70.161	51.6977	88.6244	OK	67.9207	50.0125	85.8288	OK	65.5777	48.2544	82.9011	OK
YER159C-A	YER159C-A	-	V:492855-498124	0	0	0	OK	0	0	0	OK	0	0	0	OK	0	0	0	OK
YER160C	YER160C	-	V:492855-498124	0.244229	0.0780858	0.410372	OK	0.170197	0.0319794	0.308415	OK	0.961441	0.611027	1.31186	OK	0.890976	0.559259	1.22269	OK
YER161C	YER161C	SPT2	V:499346-500348	19.8963	14.5769	25.2157	OK	19.0342	13.9011	24.1673	OK	18.8861	13.8171	23.9551	OK	17.9585	13.0849	22.8321	OK
YER162C	YER162C	RAD4	V:500629-502894	21.6703	16.6434	26.6971	OK	26.835	20.7514	32.9185	OK	22.7895	17.5689	28.0102	OK	27.3717	21.1791	33.5643	OK
YER163C	YER163C	-	V:503083-503782	24.1731	17.3656	30.9806	OK	50.3157	37.8273	62.804	OK	40.1482	29.8717	50.4247	OK	63.7565	48.6643	78.8487	OK
YER164W	YER164W	CHD1	V:505391-509798	34.1065	26.377	41.8361	OK	23.7539	18.4606	29.0472	OK	18.5807	14.4375	22.7239	OK	16.3562	12.6885	20.0239	OK
YER165C-A	YER165C-A	-	V:512626-517459	0.36852	0	5.82411	OK	0.427021	0	6.69544	OK	0	0	0	OK	0	0	0	OK
YER165W	YER165W	PAB1	V:510372-512106	240.823	182.787	298.859	OK	154.009	118.492	189.525	OK	175.558	134.467	216.649	OK	124.185	96.0205	152.35	OK
YER166W	YER166W	DNF1	V:512626-517459	101.908	76.6559	127.16	OK	102.811	77.4807	128.142	OK	79.2962	60.2844	98.308	OK	77.9128	59.3465	96.4791	OK
YER167W	YER167W	BCK2	V:518215-520771	42.3385	32.7899	51.8871	OK	39.3272	30.5635	48.0908	OK	31.8528	24.7216	38.984	OK	34.7099	26.9907	42.429	OK
YER168C	YER168C	CCA1	V:521028-522669	41.4281	32.0678	50.7884	OK	24.3029	18.5726	30.0332	OK	38.3187	29.6291	47.0083	OK	25.3552	19.4036	31.3068	OK
YER169W	YER169W	RPH1	V:523368-525759	37.4829	29.0777	45.8882	OK	18.7427	14.3976	23.0877	OK	35.1099	27.2736	42.9463	OK	31.9754	24.8133	39.1374	OK
YER170W	YER170W	ADK2	V:525973-526651	14.5583	9.92388	19.1928	OK	25.8644	18.6638	33.065	OK	11.6933	7.72526	15.6613	OK	20.7914	14.8231	26.7598	OK
YER171W	YER171W	RAD3	V:527081-529418	34.5884	26.8589	42.3179	OK	11.5364	8.6701	14.4027	OK	25.7781	19.9324	31.6239	OK	13.5098	10.2257	16.7939	OK
YER172C	YER172C	BRR2	V:529529-536021	27.9103	21.5556	34.265	OK	16.1568	12.5376	19.776	OK	21.624	16.7944	26.4535	OK	15.6035	12.1225	19.0846	OK
YER172C-A	YER172C-A	-	V:536274-538279	0.110223	0	0.831182	OK	0.106713	0	0.824592	OK	0	0	0	OK	0.988444	0	3.17978	OK
YER173W	YER173W	RAD24	V:536274-538279	14.6433	11.0352	18.2514	OK	10.0193	7.38976	12.6489	OK	13.2503	9.93924	16.5613	OK	12.0385	8.97258	15.1044	OK
YER174C	YER174C	GRX4	V:538433-539168	34.8528	25.6097	44.0959	OK	32.2291	23.778	40.6802	OK	27.1185	19.7368	34.5002	OK	18.7704	13.3746	24.1663	OK
YER175C	YER175C	TMT1	V:539463-540363	13.2104	9.31526	17.1056	OK	55.0938	42.2685	67.919	OK	50.2684	38.4487	62.0881	OK	73.9285	57.1501	90.707	OK
YER175W-A	YER175W-A	-	V:540649-540814	11.3409	0	27.1988	OK	21.9164	0.364579	43.4683	OK	5.7803	2.98655	8.57406	OK	18.0102	0	37.5966	OK
YER176W	YER176W	ECM32	V:541689-545055	73.769	56.3897	91.1483	OK	68.5582	52.8157	84.3007	OK	60.9375	47.1073	74.7678	OK	63.3617	48.9417	77.7817	OK
YER177W	YER177W	BMH1	V:545610-546414	437.882	334.688	541.075	OK	555.737	422.354	689.12	OK	429.283	328.824	529.742	OK	464.807	355.455	574.158	OK
YER178W	YER178W	PDA1	V:546816-548079	98.6627	76.7138	120.612	OK	187.84	145.003	230.678	OK	137.307	106.556	168.058	OK	176.471	136.456	216.486	OK
YER179W	YER179W	DMC1	V:548420-549517	1.07105	0.230649	1.91146	OK	2.3894	1.10689	3.67192	OK	3.26368	1.75845	4.76891	OK	6.07498	3.87969	8.27028	OK
YER180C	YER180C	ISC10	V:549723-550527	19.676	14.1162	25.2358	OK	12.4892	8.61355	16.3649	OK	16.6433	11.8418	21.4449	OK	13.5723	9.35069	17.7938	OK
[truncated: 5,127 more rows]
