# Supplementary material for: Sumoylation of Rap1 mediates the recruitment of TFIID to promote transcription of ribosomal protein genes
Source: HighWire-hosted journal article supplement (doi:10.1101/gr.185793.114), 2015-03-23
Supplement: Table_S5_-_MS_data.xlsx [file Table_S5_-_MS_data.xlsx]

## Sheet: 1. MS formaldehyde
Protein name	Protein accession numbers	Database sources	Protein molecular weight (Da)	Protein identification probability	Number of unique peptides	Number of unique spectra	Number of total spectra	Percentage of total spectra	Percentage sequence coverage
Aspartyl aminopeptidase 4 OS=Saccharomyces cerevisiae (strain ATCC 204508 / S288c) GN=APE4 PE=1 SV=1	P38821|DNPEP_YEAST	uniprot_sprot.fasta	54,175.6	10.1%	0	0	0	0.000%	0.000%
Pentafunctional AROM polypeptide OS=Saccharomyces cerevisiae (strain YJM789) GN=ARO1 PE=3 SV=1	A6ZY89|ARO1_YEAS7,B3LGE9|ARO1_YEAS1,C7GIN5|ARO1_YEAS2,C8Z543|ARO1_YEAS8,P08566|ARO1_YEAST	uniprot_sprot.fasta	174,770.1	5.4%	0	0	0	0.000%	0.000%
Altered inheritance of mitochondria protein 9, mitochondrial OS=Saccharomyces cerevisiae (strain YJM789) GN=AIM9 PE=3 SV=1	A6ZR36|AIM9_YEAS7,B3LRJ8|AIM9_YEAS1,C7GRR3|AIM9_YEAS2,C8Z792|AIM9_YEAS8,P40053|AIM9_YEAST	uniprot_sprot.fasta	72,393.3	31.5%	0	0	0	0.000%	0.000%
Glucose-6-phosphate 1-dehydrogenase OS=Saccharomyces cerevisiae (strain ATCC 204508 / S288c) GN=ZWF1 PE=1 SV=4	P11412|G6PD_YEAST	uniprot_sprot.fasta	57,523.6	50.0%	1	1	1	0.00174%	2.97%
Phosphoribosylaminoimidazole-succinocarboxamide synthase OS=Saccharomyces cerevisiae (strain ATCC 204508 / S288c) GN=ADE1 PE=1 SV=2	P27616|PUR7_YEAST	uniprot_sprot.fasta	34,604.8	99.8%	1	1	1	0.00174%	3.92%
Uracil phosphoribosyltransferase OS=Saccharomyces cerevisiae (strain ATCC 204508 / S288c) GN=FUR1 PE=1 SV=2	P18562|UPP_YEAST	uniprot_sprot.fasta	24,595.5	98.1%	1	1	1	0.00174%	6.02%
Low-affinity Fe(2+) transport protein OS=Saccharomyces cerevisiae (strain ATCC 204508 / S288c) GN=FET4 PE=1 SV=2	P40988|FET4_YEAST	uniprot_sprot.fasta	62,793.3	50.0%	1	1	1	0.00174%	1.81%
Translational activator GCN1 OS=Saccharomyces cerevisiae (strain ATCC 204508 / S288c) GN=GCN1 PE=1 SV=1	P33892|GCN1_YEAST	uniprot_sprot.fasta	296,710.2	98.7%	1	1	1	0.00174%	0.412%
ABC transporter ATP-binding protein ARB1 OS=Saccharomyces cerevisiae (strain ATCC 204508 / S288c) GN=ARB1 PE=1 SV=1	P40024|ARB1_YEAST	uniprot_sprot.fasta	68,379.5	50.0%	1	1	1	0.00174%	2.13%
ATP-dependent RNA helicase DBP2 OS=Saccharomyces cerevisiae (strain YJM789) GN=DBP2 PE=3 SV=1	A6ZRX0|DBP2_YEAS7,P24783|DBP2_YEAST	uniprot_sprot.fasta	60,987.1	50.0%	1	1	1	0.00179%	4.21%
Ubiquitin-activating enzyme E1-like OS=Saccharomyces cerevisiae (strain ATCC 204508 / S288c) GN=UBA2 PE=1 SV=1	P52488|UBA2_YEAST	uniprot_sprot.fasta	71,262.6	50.0%	1	1	1	0.00179%	1.42%
Acetyl-coenzyme A synthetase 1 OS=Saccharomyces cerevisiae (strain ATCC 204508 / S288c) GN=ACS1 PE=1 SV=2	Q01574|ACS1_YEAST	uniprot_sprot.fasta	79,142.5	50.0%	1	1	1	0.00179%	1.40%
DNA damage tolerance protein RHC31 OS=Saccharomyces cerevisiae (strain ATCC 204508 / S288c) GN=AOS1 PE=1 SV=1	Q06624|RHC31_YEAST	uniprot_sprot.fasta	39,275.0	50.0%	1	1	1	0.00179%	4.61%
Cysteine proteinase 1, mitochondrial OS=Saccharomyces cerevisiae (strain YJM789) GN=LAP3 PE=3 SV=2	A6ZRK4|BLH1_YEAS7,B3LP78|BLH1_YEAS1,B5VQH0|BLH1_YEAS6,C7GPC1|BLH1_YEAS2,C8ZFZ7|BLH1_YEAS8,Q01532|BLH1_YEAST	uniprot_sprot.fasta	55,485.4	50.0%	1	1	1	0.00179%	2.90%
Pyruvate dehydrogenase E1 component subunit alpha, mitochondrial OS=Saccharomyces cerevisiae (strain ATCC 204508 / S288c) GN=PDA1 PE=1 SV=2	P16387|ODPA_YEAST	uniprot_sprot.fasta	46,344.4	50.0%	1	1	1	0.00179%	2.62%
Sterol 24-C-methyltransferase OS=Saccharomyces cerevisiae (strain ATCC 204508 / S288c) GN=ERG6 PE=1 SV=4	P25087|ERG6_YEAST	uniprot_sprot.fasta	43,431.6	50.0%	1	1	1	0.00179%	4.70%
Cell division control protein 12 OS=Saccharomyces cerevisiae (strain ATCC 204508 / S288c) GN=CDC12 PE=1 SV=1	P32468|CDC12_YEAST	uniprot_sprot.fasta	46,668.9	99.3%	1	1	1	0.00179%	2.70%
Arginine biosynthesis bifunctional protein ArgJ, mitochondrial OS=Saccharomyces cerevisiae (strain YJM789) GN=ARG7 PE=3 SV=1	A6ZMC1|ARGJ_YEAS7,B3LLV5|ARGJ_YEAS1,B5VPI9|ARGJ_YEAS6,C7GL62|ARGJ_YEAS2,C8ZER4|ARGJ_YEAS8,Q04728|ARGJ_YEAST	uniprot_sprot.fasta	47,850.2	98.9%	1	1	1	0.00179%	3.17%
Cytochrome b2, mitochondrial OS=Saccharomyces cerevisiae (strain ATCC 204508 / S288c) GN=CYB2 PE=1 SV=1	P00175|CYB2_YEAST	uniprot_sprot.fasta	65,541.2	50.0%	1	1	1	0.00179%	2.71%
Alpha-soluble NSF attachment protein OS=Saccharomyces cerevisiae (strain ATCC 204508 / S288c) GN=SEC17 PE=1 SV=4	P32602|SEC17_YEAST	uniprot_sprot.fasta	32,804.4	50.0%	1	1	1	0.00179%	4.45%
Proteasome component Y13 OS=Saccharomyces cerevisiae (strain ATCC 204508 / S288c) GN=PRE9 PE=1 SV=1	P23638|PSA4_YEAST	uniprot_sprot.fasta	28,715.8	99.7%	1	1	1	0.00196%	6.98%
Transaldolase NQM1 OS=Saccharomyces cerevisiae (strain ATCC 204508 / S288c) GN=NQM1 PE=1 SV=1	P53228|TAL2_YEAST	uniprot_sprot.fasta	37,254.8	51.9%	1	1	1	0.00196%	3.90%
Urea amidolyase OS=Saccharomyces cerevisiae (strain ATCC 204508 / S288c) GN=DUR1,2 PE=1 SV=2	P32528|DUR1_YEAST	uniprot_sprot.fasta	201,836.1	51.9%	1	1	1	0.00196%	0.763%
4-aminobutyrate aminotransferase OS=Saccharomyces cerevisiae (strain ATCC 204508 / S288c) GN=UGA1 PE=1 SV=2	P17649|GABAT_YEAST	uniprot_sprot.fasta	52,948.6	99.4%	1	1	1	0.00196%	2.97%
Aminopeptidase 2, mitochondrial OS=Saccharomyces cerevisiae (strain ATCC 204508 / S288c) GN=APE2 PE=1 SV=4	P32454|APE2_YEAST	uniprot_sprot.fasta	107,758.3	99.3%	1	1	1	0.00196%	1.58%
External NADH-ubiquinone oxidoreductase 1, mitochondrial OS=Saccharomyces cerevisiae (strain ATCC 204508 / S288c) GN=NDE1 PE=1 SV=1	P40215|NDH1_YEAST	uniprot_sprot.fasta	62,776.5	100.0%	2	2	2	0.00347%	5.89%
Cytochrome c peroxidase, mitochondrial OS=Saccharomyces cerevisiae (strain ATCC 204508 / S288c) GN=CCP1 PE=1 SV=2	P00431|CCPR_YEAST	uniprot_sprot.fasta	40,354.4	100.0%	2	2	2	0.00347%	8.86%
Alpha-soluble NSF attachment protein OS=Saccharomyces cerevisiae (strain ATCC 204508 / S288c) GN=SEC17 PE=1 SV=4	P32602|SEC17_YEAST	uniprot_sprot.fasta	32,804.4	99.8%	2	2	2	0.00347%	9.93%
Transaldolase NQM1 OS=Saccharomyces cerevisiae (strain ATCC 204508 / S288c) GN=NQM1 PE=1 SV=1	P53228|TAL2_YEAST	uniprot_sprot.fasta	37,254.8	99.8%	2	2	2	0.00347%	8.41%
ATP synthase subunit d, mitochondrial OS=Saccharomyces cerevisiae (strain ATCC 204508 / S288c) GN=ATP7 PE=1 SV=2	P30902|ATP7_YEAST	uniprot_sprot.fasta	19,810.2	99.8%	2	2	2	0.00347%	13.2%
Enoyl-[acyl-carrier protein] reductase [NADPH, B-specific], mitochondrial OS=Saccharomyces cerevisiae (strain ATCC 204508 / S288c) GN=ETR1 PE=1 SV=3	P38071|ETR1_YEAST	uniprot_sprot.fasta	42,068.0	100.0%	2	2	2	0.00347%	6.84%
60S ribosomal protein L30 OS=Saccharomyces cerevisiae (strain ATCC 204508 / S288c) GN=RPL30 PE=1 SV=3	P14120|RL30_YEAST	uniprot_sprot.fasta	11,416.0	100.0%	2	2	2	0.00347%	11.4%
Altered inheritance of mitochondria protein 9, mitochondrial OS=Saccharomyces cerevisiae (strain YJM789) GN=AIM9 PE=3 SV=1	A6ZR36|AIM9_YEAS7,B3LRJ8|AIM9_YEAS1,C7GRR3|AIM9_YEAS2,C8Z792|AIM9_YEAS8,P40053|AIM9_YEAST	uniprot_sprot.fasta	72,393.3	99.8%	2	2	2	0.00347%	4.63%
Hit family protein 1 OS=Saccharomyces cerevisiae (strain ATCC 204508 / S288c) GN=HNT1 PE=1 SV=2	Q04344|HNT1_YEAST	uniprot_sprot.fasta	17,680.8	98.5%	1	1	2	0.00347%	9.49%
Cofilin OS=Saccharomyces cerevisiae (strain ATCC 204508 / S288c) GN=COF1 PE=1 SV=1	Q03048|COFI_YEAST	uniprot_sprot.fasta	15,901.2	50.0%	1	1	2	0.00347%	9.79%
26S proteasome regulatory subunit RPN9 OS=Saccharomyces cerevisiae (strain ATCC 204508 / S288c) GN=RPN9 PE=1 SV=1	Q04062|RPN9_YEAST	uniprot_sprot.fasta	45,785.8	99.8%	2	2	2	0.00357%	5.60%
Proteasome component Y13 OS=Saccharomyces cerevisiae (strain ATCC 204508 / S288c) GN=PRE9 PE=1 SV=1	P23638|PSA4_YEAST	uniprot_sprot.fasta	28,715.8	99.8%	2	2	2	0.00357%	12.0%
Cytochrome c peroxidase, mitochondrial OS=Saccharomyces cerevisiae (strain ATCC 204508 / S288c) GN=CCP1 PE=1 SV=2	P00431|CCPR_YEAST	uniprot_sprot.fasta	40,354.4	99.9%	2	2	2	0.00357%	6.93%
NADH-cytochrome b5 reductase 1 OS=Saccharomyces cerevisiae (strain YJM789) GN=CBR1 PE=3 SV=2	A6ZVM6|NCB5R_YEAS7,P38626|NCB5R_YEAST	uniprot_sprot.fasta	31,422.6	99.8%	2	2	2	0.00357%	7.04%
NAD-specific glutamate dehydrogenase OS=Saccharomyces cerevisiae (strain ATCC 204508 / S288c) GN=GDH2 PE=1 SV=1	P33327|DHE2_YEAST	uniprot_sprot.fasta	124,339.2	100.0%	2	2	2	0.00357%	2.93%
60S ribosomal protein L28 OS=Saccharomyces cerevisiae (strain ATCC 204508 / S288c) GN=RPL28 PE=1 SV=3	P02406|RL28_YEAST	uniprot_sprot.fasta	16,721.9	100.0%	2	2	2	0.00357%	18.8%
Uracil phosphoribosyltransferase OS=Saccharomyces cerevisiae (strain ATCC 204508 / S288c) GN=FUR1 PE=1 SV=2	P18562|UPP_YEAST	uniprot_sprot.fasta	24,595.5	99.9%	2	2	2	0.00357%	12.0%
4-aminobutyrate aminotransferase OS=Saccharomyces cerevisiae (strain ATCC 204508 / S288c) GN=UGA1 PE=1 SV=2	P17649|GABAT_YEAST	uniprot_sprot.fasta	52,948.6	99.8%	2	2	2	0.00357%	3.61%
DNA-directed RNA polymerase II subunit RPB2 OS=Saccharomyces cerevisiae (strain ATCC 204508 / S288c) GN=RPB2 PE=1 SV=2	P08518|RPB2_YEAST	uniprot_sprot.fasta	138,757.2	99.8%	2	2	2	0.00357%	1.72%
D-3-phosphoglycerate dehydrogenase 1 OS=Saccharomyces cerevisiae (strain ATCC 204508 / S288c) GN=SER3 PE=1 SV=1	P40054|SERA_YEAST	uniprot_sprot.fasta	51,194.1	99.8%	2	2	2	0.00357%	5.76%
Glycerol-3-phosphate dehydrogenase, mitochondrial OS=Saccharomyces cerevisiae (strain ATCC 204508 / S288c) GN=GUT2 PE=1 SV=2	P32191|GPDM_YEAST	uniprot_sprot.fasta	72,390.6	99.8%	2	2	2	0.00357%	3.54%
Nucleolar protein 56 OS=Saccharomyces cerevisiae (strain ATCC 204508 / S288c) GN=NOP56 PE=1 SV=1	Q12460|NOP56_YEAST	uniprot_sprot.fasta	56,867.3	99.8%	2	2	2	0.00357%	4.76%
UPF0364 protein YMR027W OS=Saccharomyces cerevisiae (strain ATCC 204508 / S288c) GN=YMR027W PE=1 SV=1	Q04371|YMR7_YEAST	uniprot_sprot.fasta	54,130.9	50.0%	1	1	2	0.00357%	2.77%
26S protease regulatory subunit 4 homolog OS=Saccharomyces cerevisiae (strain ATCC 204508 / S288c) GN=RPT2 PE=1 SV=3	P40327|PRS4_YEAST	uniprot_sprot.fasta	48,830.5	99.8%	1	1	2	0.00357%	2.52%
ATP-dependent RNA helicase DBP5 OS=Saccharomyces cerevisiae (strain YJM789) GN=DBP5 PE=3 SV=1	A6ZNQ1|DBP5_YEAS7,P20449|DBP5_YEAST	uniprot_sprot.fasta	53,875.8	50.0%	1	1	2	0.00357%	2.70%
Aspartyl aminopeptidase 4 OS=Saccharomyces cerevisiae (strain ATCC 204508 / S288c) GN=APE4 PE=1 SV=1	P38821|DNPEP_YEAST	uniprot_sprot.fasta	54,175.6	99.8%	2	2	2	0.00392%	5.71%
Glutamine--tRNA ligase OS=Saccharomyces cerevisiae (strain ATCC 204508 / S288c) GN=GLN4 PE=1 SV=2	P13188|SYQ_YEAST	uniprot_sprot.fasta	93,135.0	99.8%	2	2	2	0.00392%	2.84%
UPF0364 protein YMR027W OS=Saccharomyces cerevisiae (strain ATCC 204508 / S288c) GN=YMR027W PE=1 SV=1	Q04371|YMR7_YEAST	uniprot_sprot.fasta	54,130.9	99.8%	2	2	2	0.00392%	5.74%
Nuclear protein STH1/NPS1 OS=Saccharomyces cerevisiae (strain ATCC 204508 / S288c) GN=STH1 PE=1 SV=1	P32597|STH1_YEAST	uniprot_sprot.fasta	156,750.6	100.0%	2	2	2	0.00392%	1.47%
Coatomer subunit alpha OS=Saccharomyces cerevisiae (strain ATCC 204508 / S288c) GN=COP1 PE=1 SV=2	P53622|COPA_YEAST	uniprot_sprot.fasta	135,611.2	99.8%	2	2	2	0.00392%	2.16%
Ubiquitin-40S ribosomal protein S31 OS=Saccharomyces cerevisiae (strain ATCC 204508 / S288c) GN=RPS31 PE=1 SV=3	P05759|RS27A_YEAST	uniprot_sprot.fasta	17,216.6	98.9%	1	2	2	0.00392%	5.92%
26S proteasome regulatory subunit RPN2 OS=Saccharomyces cerevisiae (strain ATCC 204508 / S288c) GN=RPN2 PE=1 SV=4	P32565|RPN2_YEAST	uniprot_sprot.fasta	104,237.0	99.8%	2	2	2	0.00392%	2.65%
60S ribosomal protein L30 OS=Saccharomyces cerevisiae (strain ATCC 204508 / S288c) GN=RPL30 PE=1 SV=3	P14120|RL30_YEAST	uniprot_sprot.fasta	11,416.0	99.8%	2	2	2	0.00392%	11.4%
D-3-phosphoglycerate dehydrogenase 1 OS=Saccharomyces cerevisiae (strain ATCC 204508 / S288c) GN=SER3 PE=1 SV=1	P40054|SERA_YEAST	uniprot_sprot.fasta	51,194.1	99.8%	2	2	2	0.00392%	5.97%
Arginine biosynthesis bifunctional protein ArgJ, mitochondrial OS=Saccharomyces cerevisiae (strain YJM789) GN=ARG7 PE=3 SV=1	A6ZMC1|ARGJ_YEAS7,B3LLV5|ARGJ_YEAS1,B5VPI9|ARGJ_YEAS6,C7GL62|ARGJ_YEAS2,C8ZER4|ARGJ_YEAS8,Q04728|ARGJ_YEAST	uniprot_sprot.fasta	47,850.2	99.8%	2	2	2	0.00392%	6.80%
2-oxoglutarate dehydrogenase, mitochondrial OS=Saccharomyces cerevisiae (strain ATCC 204508 / S288c) GN=KGD1 PE=1 SV=2	P20967|ODO1_YEAST	uniprot_sprot.fasta	114,419.3	99.8%	2	2	2	0.00392%	2.66%
Proteasome component Y7 OS=Saccharomyces cerevisiae (strain ATCC 204508 / S288c) GN=PRE8 PE=1 SV=1	P23639|PSA2_YEAST	uniprot_sprot.fasta	27,163.1	99.6%	1	1	2	0.00392%	4.80%
ABC transporter ATP-binding protein ARB1 OS=Saccharomyces cerevisiae (strain ATCC 204508 / S288c) GN=ARB1 PE=1 SV=1	P40024|ARB1_YEAST	uniprot_sprot.fasta	68,379.5	98.5%	1	1	2	0.00392%	2.13%
60S ribosomal protein L27-A OS=Saccharomyces cerevisiae (strain ATCC 204508 / S288c) GN=RPL27A PE=1 SV=1	P0C2H6|RL27A_YEAST,P0C2H7|RL27B_YEAST	uniprot_sprot.fasta	15,531.2	100.0%	3	3	3	0.00521%	28.7%
40S ribosomal protein S18-A OS=Saccharomyces cerevisiae (strain ATCC 204508 / S288c) GN=RPS18A PE=1 SV=1	P0CX55|RS18A_YEAST,P0CX56|RS18B_YEAST	uniprot_sprot.fasta	17,037.9	100.0%	3	3	3	0.00521%	19.2%
NADH-cytochrome b5 reductase 1 OS=Saccharomyces cerevisiae (strain YJM789) GN=CBR1 PE=3 SV=2	A6ZVM6|NCB5R_YEAS7,P38626|NCB5R_YEAST	uniprot_sprot.fasta	31,422.6	100.0%	3	3	3	0.00521%	7.04%
10 kDa heat shock protein, mitochondrial OS=Saccharomyces cerevisiae (strain ATCC 204508 / S288c) GN=HSP10 PE=1 SV=1	P38910|CH10_YEAST	uniprot_sprot.fasta	11,372.4	100.0%	3	3	3	0.00521%	34.9%
T-complex protein 1 subunit eta OS=Saccharomyces cerevisiae (strain ATCC 204508 / S288c) GN=CCT7 PE=1 SV=1	P42943|TCPH_YEAST	uniprot_sprot.fasta	59,737.1	100.0%	3	3	3	0.00521%	6.73%
Eukaryotic translation initiation factor 4E OS=Saccharomyces cerevisiae (strain ATCC 204508 / S288c) GN=CDC33 PE=1 SV=1	P07260|IF4E_YEAST	uniprot_sprot.fasta	24,254.6	100.0%	3	3	3	0.00521%	18.8%
60S ribosomal protein L6-B OS=Saccharomyces cerevisiae (strain ATCC 204508 / S288c) GN=RPL6B PE=1 SV=4	P05739|RL6B_YEAST	uniprot_sprot.fasta	19,986.9	100.0%	3	3	3	0.00521%	17.6%
Orotate phosphoribosyltransferase 1 OS=Saccharomyces cerevisiae (strain ATCC 204508 / S288c) GN=URA5 PE=1 SV=2	P13298|PYRE_YEAST	uniprot_sprot.fasta	24,666.0	100.0%	3	3	3	0.00521%	17.3%
Pentafunctional AROM polypeptide OS=Saccharomyces cerevisiae (strain YJM789) GN=ARO1 PE=3 SV=1	A6ZY89|ARO1_YEAS7,B3LGE9|ARO1_YEAS1,C7GIN5|ARO1_YEAS2,C8Z543|ARO1_YEAS8,P08566|ARO1_YEAST	uniprot_sprot.fasta	174,770.1	100.0%	3	3	3	0.00521%	2.52%
Cytochrome b2, mitochondrial OS=Saccharomyces cerevisiae (strain ATCC 204508 / S288c) GN=CYB2 PE=1 SV=1	P00175|CYB2_YEAST	uniprot_sprot.fasta	65,541.2	100.0%	3	3	3	0.00521%	7.95%
T-complex protein 1 subunit theta OS=Saccharomyces cerevisiae (strain ATCC 204508 / S288c) GN=CCT8 PE=1 SV=1	P47079|TCPQ_YEAST	uniprot_sprot.fasta	61,663.6	100.0%	3	3	3	0.00521%	7.04%
Aminopeptidase 2, mitochondrial OS=Saccharomyces cerevisiae (strain ATCC 204508 / S288c) GN=APE2 PE=1 SV=4	P32454|APE2_YEAST	uniprot_sprot.fasta	107,758.3	100.0%	3	3	3	0.00521%	4.31%
26S proteasome regulatory subunit RPN9 OS=Saccharomyces cerevisiae (strain ATCC 204508 / S288c) GN=RPN9 PE=1 SV=1	Q04062|RPN9_YEAST	uniprot_sprot.fasta	45,785.8	99.8%	2	2	3	0.00521%	5.09%
Histidine--tRNA ligase, mitochondrial OS=Saccharomyces cerevisiae (strain ATCC 204508 / S288c) GN=HTS1 PE=1 SV=2	P07263|SYH_YEAST	uniprot_sprot.fasta	59,955.0	99.9%	2	2	3	0.00521%	4.21%
Methionine--tRNA ligase, cytoplasmic OS=Saccharomyces cerevisiae (strain ATCC 204508 / S288c) GN=MES1 PE=1 SV=4	P00958|SYMC_YEAST	uniprot_sprot.fasta	85,680.9	99.8%	2	2	3	0.00521%	3.60%
Peptidyl-prolyl cis-trans isomerase C, mitochondrial OS=Saccharomyces cerevisiae (strain ATCC 204508 / S288c) GN=CPR3 PE=1 SV=1	P25719|CYPC_YEAST	uniprot_sprot.fasta	19,919.3	99.8%	2	2	3	0.00521%	10.4%
Dolichol-phosphate mannosyltransferase OS=Saccharomyces cerevisiae (strain ATCC 204508 / S288c) GN=DPM1 PE=1 SV=3	P14020|DPM1_YEAST	uniprot_sprot.fasta	30,363.4	99.7%	1	1	3	0.00521%	4.87%
Adenosine kinase OS=Saccharomyces cerevisiae (strain ATCC 204508 / S288c) GN=ADO1 PE=1 SV=1	P47143|ADK_YEAST	uniprot_sprot.fasta	36,372.9	50.0%	1	1	3	0.00521%	5.00%
Ras-related protein SEC4 OS=Saccharomyces cerevisiae (strain ATCC 204508 / S288c) GN=SEC4 PE=1 SV=1	P07560|SEC4_YEAST	uniprot_sprot.fasta	23,506.6	50.0%	1	1	3	0.00521%	5.12%
60S ribosomal protein L27-A OS=Saccharomyces cerevisiae (strain ATCC 204508 / S288c) GN=RPL27A PE=1 SV=1	P0C2H6|RL27A_YEAST,P0C2H7|RL27B_YEAST	uniprot_sprot.fasta	15,531.2	100.0%	3	3	3	0.00536%	27.2%
External NADH-ubiquinone oxidoreductase 1, mitochondrial OS=Saccharomyces cerevisiae (strain ATCC 204508 / S288c) GN=NDE1 PE=1 SV=1	P40215|NDH1_YEAST	uniprot_sprot.fasta	62,776.5	100.0%	3	3	3	0.00536%	7.14%
Ubiquitin-activating enzyme E1 1 OS=Saccharomyces cerevisiae (strain ATCC 204508 / S288c) GN=UBA1 PE=1 SV=2	P22515|UBA1_YEAST	uniprot_sprot.fasta	114,270.4	100.0%	3	3	3	0.00536%	4.39%
Protein disulfide-isomerase OS=Saccharomyces cerevisiae (strain ATCC 204508 / S288c) GN=PDI1 PE=1 SV=2	P17967|PDI_YEAST	uniprot_sprot.fasta	58,228.2	100.0%	3	3	3	0.00536%	7.47%
Orotate phosphoribosyltransferase 1 OS=Saccharomyces cerevisiae (strain ATCC 204508 / S288c) GN=URA5 PE=1 SV=2	P13298|PYRE_YEAST	uniprot_sprot.fasta	24,666.0	100.0%	3	3	3	0.00536%	15.9%
ATP synthase subunit d, mitochondrial OS=Saccharomyces cerevisiae (strain ATCC 204508 / S288c) GN=ATP7 PE=1 SV=2	P30902|ATP7_YEAST	uniprot_sprot.fasta	19,810.2	100.0%	3	3	3	0.00536%	21.3%
Glutamate synthase [NADH] OS=Saccharomyces cerevisiae (strain ATCC 204508 / S288c) GN=GLT1 PE=1 SV=2	Q12680|GLT1_YEAST	uniprot_sprot.fasta	238,108.3	100.0%	3	3	3	0.00536%	1.96%
Heat shock protein 78, mitochondrial OS=Saccharomyces cerevisiae (strain ATCC 204508 / S288c) GN=HSP78 PE=1 SV=2	P33416|HSP78_YEAST	uniprot_sprot.fasta	91,340.8	100.0%	3	3	3	0.00536%	5.55%
F-actin-capping protein subunit beta OS=Saccharomyces cerevisiae (strain ATCC 204508 / S288c) GN=CAP2 PE=1 SV=3	P13517|CAPZB_YEAST	uniprot_sprot.fasta	32,630.4	100.0%	3	3	3	0.00536%	15.3%
ATP synthase subunit 5, mitochondrial OS=Saccharomyces cerevisiae (strain ATCC 204508 / S288c) GN=ATP5 PE=1 SV=1	P09457|ATPO_YEAST	uniprot_sprot.fasta	22,815.3	100.0%	3	3	3	0.00536%	19.8%
60S ribosomal protein L1-A OS=Saccharomyces cerevisiae (strain ATCC 204508 / S288c) GN=RPL1A PE=1 SV=1	P0CX43|RL1A_YEAST,P0CX44|RL1B_YEAST	uniprot_sprot.fasta	24,486.3	100.0%	3	3	3	0.00536%	17.5%
NADPH-dependent alpha-keto amide reductase OS=Saccharomyces cerevisiae (strain ATCC 204508 / S288c) GN=YDL124W PE=1 SV=1	Q07551|KAR_YEAST	uniprot_sprot.fasta	35,562.0	100.0%	2	2	3	0.00536%	5.13%
L-asparaginase 1 OS=Saccharomyces cerevisiae (strain ATCC 204508 / S288c) GN=ASP1 PE=1 SV=1	P38986|ASPG1_YEAST	uniprot_sprot.fasta	41,396.1	99.8%	2	2	3	0.00536%	6.56%
Ras-related protein SEC4 OS=Saccharomyces cerevisiae (strain ATCC 204508 / S288c) GN=SEC4 PE=1 SV=1	P07560|SEC4_YEAST	uniprot_sprot.fasta	23,506.6	100.0%	2	2	3	0.00536%	13.5%
Proteasome component Y7 OS=Saccharomyces cerevisiae (strain ATCC 204508 / S288c) GN=PRE8 PE=1 SV=1	P23639|PSA2_YEAST	uniprot_sprot.fasta	27,163.1	99.9%	2	2	3	0.00536%	10.00%
Rotenone-insensitive NADH-ubiquinone oxidoreductase, mitochondrial OS=Saccharomyces cerevisiae (strain ATCC 204508 / S288c) GN=NDI1 PE=1 SV=1	P32340|NDI1_YEAST	uniprot_sprot.fasta	57,252.8	100.0%	2	2	3	0.00536%	4.09%
Proliferating cell nuclear antigen OS=Saccharomyces cerevisiae (strain ATCC 204508 / S288c) GN=POL30 PE=1 SV=1	P15873|PCNA_YEAST	uniprot_sprot.fasta	28,918.1	99.9%	2	2	3	0.00536%	9.69%
60S ribosomal protein L15-A OS=Saccharomyces cerevisiae (strain ATCC 204508 / S288c) GN=RPL15A PE=1 SV=3	P05748|RL15A_YEAST	uniprot_sprot.fasta	24,422.6	99.8%	2	2	3	0.00536%	7.35%
DNA-directed RNA polymerase I subunit RPA34 OS=Saccharomyces cerevisiae (strain ATCC 204508 / S288c) GN=RPA34 PE=1 SV=1	P47006|RPA34_YEAST	uniprot_sprot.fasta	26,876.5	50.0%	1	1	3	0.00536%	7.73%
Succinate dehydrogenase [ubiquinone] iron-sulfur subunit, mitochondrial OS=Saccharomyces cerevisiae (strain ATCC 204508 / S288c) GN=SDH2 PE=1 SV=1	P21801|DHSB_YEAST	uniprot_sprot.fasta	30,232.3	98.6%	1	1	3	0.00536%	4.51%
Phosphoenolpyruvate carboxykinase [ATP] OS=Saccharomyces cerevisiae (strain ATCC 204508 / S288c) GN=PCK1 PE=1 SV=2	P10963|PCKA_YEAST	uniprot_sprot.fasta	60,984.4	50.0%	1	1	3	0.00536%	2.37%
40S ribosomal protein S4-A OS=Saccharomyces cerevisiae (strain ATCC 204508 / S288c) GN=RPS4A PE=1 SV=1	P0CX35|RS4A_YEAST,P0CX36|RS4B_YEAST	uniprot_sprot.fasta	29,411.2	100.0%	3	3	3	0.00589%	12.6%
Ubiquitin-activating enzyme E1 1 OS=Saccharomyces cerevisiae (strain ATCC 204508 / S288c) GN=UBA1 PE=1 SV=2	P22515|UBA1_YEAST	uniprot_sprot.fasta	114,270.4	100.0%	3	3	3	0.00589%	4.20%
ATP synthase subunit 4, mitochondrial OS=Saccharomyces cerevisiae (strain ATCC 204508 / S288c) GN=ATP4 PE=1 SV=2	P05626|ATPF_YEAST	uniprot_sprot.fasta	26,925.5	100.0%	3	3	3	0.00589%	16.0%
Histidine--tRNA ligase, mitochondrial OS=Saccharomyces cerevisiae (strain ATCC 204508 / S288c) GN=HTS1 PE=1 SV=2	P07263|SYH_YEAST	uniprot_sprot.fasta	59,955.0	100.0%	3	3	3	0.00589%	7.69%
Sphingolipid long chain base-responsive protein PIL1 OS=Saccharomyces cerevisiae (strain ATCC 204508 / S288c) GN=PIL1 PE=1 SV=1	P53252|PIL1_YEAST	uniprot_sprot.fasta	38,350.3	100.0%	3	3	3	0.00589%	12.7%
60S ribosomal protein L17-A OS=Saccharomyces cerevisiae (strain ATCC 204508 / S288c) GN=RPL17A PE=1 SV=4	P05740|RL17A_YEAST	uniprot_sprot.fasta	20,549.6	100.0%	3	3	3	0.00589%	22.8%
Nucleolar protein NET1 OS=Saccharomyces cerevisiae (strain ATCC 204508 / S288c) GN=NET1 PE=1 SV=1	P47035|NET1_YEAST	uniprot_sprot.fasta	128,535.1	100.0%	3	3	3	0.00589%	3.70%
ATP synthase subunit 5, mitochondrial OS=Saccharomyces cerevisiae (strain ATCC 204508 / S288c) GN=ATP5 PE=1 SV=1	P09457|ATPO_YEAST	uniprot_sprot.fasta	22,815.3	100.0%	3	3	3	0.00589%	17.5%
Nucleolar GTP-binding protein 2 OS=Saccharomyces cerevisiae (strain ATCC 204508 / S288c) GN=NOG2 PE=1 SV=1	P53742|NOG2_YEAST	uniprot_sprot.fasta	55,490.3	100.0%	3	3	3	0.00589%	7.82%
F-actin-capping protein subunit beta OS=Saccharomyces cerevisiae (strain ATCC 204508 / S288c) GN=CAP2 PE=1 SV=3	P13517|CAPZB_YEAST	uniprot_sprot.fasta	32,630.4	99.8%	2	2	3	0.00589%	11.8%
Anthranilate synthase component 1 OS=Saccharomyces cerevisiae (strain ATCC 204508 / S288c) GN=TRP2 PE=1 SV=4	P00899|TRPE_YEAST	uniprot_sprot.fasta	56,769.5	100.0%	2	2	3	0.00589%	5.33%
40S ribosomal protein S4-A OS=Saccharomyces cerevisiae (strain ATCC 204508 / S288c) GN=RPS4A PE=1 SV=1	P0CX35|RS4A_YEAST,P0CX36|RS4B_YEAST	uniprot_sprot.fasta	29,411.2	100.0%	4	4	4	0.00694%	19.9%
Aspartyl aminopeptidase 4 OS=Saccharomyces cerevisiae (strain ATCC 204508 / S288c) GN=APE4 PE=1 SV=1	P38821|DNPEP_YEAST	uniprot_sprot.fasta	54,175.6	100.0%	4	4	4	0.00694%	7.96%
Proteasome component Y13 OS=Saccharomyces cerevisiae (strain ATCC 204508 / S288c) GN=PRE9 PE=1 SV=1	P23638|PSA4_YEAST	uniprot_sprot.fasta	28,715.8	100.0%	4	4	4	0.00694%	20.9%
UPF0364 protein YMR027W OS=Saccharomyces cerevisiae (strain ATCC 204508 / S288c) GN=YMR027W PE=1 SV=1	Q04371|YMR7_YEAST	uniprot_sprot.fasta	54,130.9	100.0%	4	4	4	0.00694%	9.57%
La protein homolog OS=Saccharomyces cerevisiae (strain ATCC 204508 / S288c) GN=LHP1 PE=1 SV=2	P33399|LHP1_YEAST	uniprot_sprot.fasta	32,104.9	100.0%	4	4	4	0.00694%	15.6%
Protein disulfide-isomerase OS=Saccharomyces cerevisiae (strain ATCC 204508 / S288c) GN=PDI1 PE=1 SV=2	P17967|PDI_YEAST	uniprot_sprot.fasta	58,228.2	100.0%	4	4	4	0.00694%	9.58%
Ribonucleoside-diphosphate reductase small chain 1 OS=Saccharomyces cerevisiae (strain ATCC 204508 / S288c) GN=RNR2 PE=1 SV=2	P09938|RIR2_YEAST	uniprot_sprot.fasta	46,149.4	100.0%	4	4	4	0.00694%	14.3%
D-3-phosphoglycerate dehydrogenase 1 OS=Saccharomyces cerevisiae (strain ATCC 204508 / S288c) GN=SER3 PE=1 SV=1	P40054|SERA_YEAST	uniprot_sprot.fasta	51,194.1	100.0%	4	4	4	0.00694%	11.1%
40S ribosomal protein S8-A OS=Saccharomyces cerevisiae (strain ATCC 204508 / S288c) GN=RPS8A PE=1 SV=1	P0CX39|RS8A_YEAST,P0CX40|RS8B_YEAST	uniprot_sprot.fasta	22,490.4	100.0%	4	4	4	0.00694%	27.5%
Nucleolar GTP-binding protein 2 OS=Saccharomyces cerevisiae (strain ATCC 204508 / S288c) GN=NOG2 PE=1 SV=1	P53742|NOG2_YEAST	uniprot_sprot.fasta	55,490.3	100.0%	4	4	4	0.00694%	9.67%
Arginine biosynthesis bifunctional protein ArgJ, mitochondrial OS=Saccharomyces cerevisiae (strain YJM789) GN=ARG7 PE=3 SV=1	A6ZMC1|ARGJ_YEAS7,B3LLV5|ARGJ_YEAS1,B5VPI9|ARGJ_YEAS6,C7GL62|ARGJ_YEAS2,C8ZER4|ARGJ_YEAS8,Q04728|ARGJ_YEAST	uniprot_sprot.fasta	47,850.2	100.0%	4	4	4	0.00694%	13.4%
Ribose-5-phosphate isomerase OS=Saccharomyces cerevisiae (strain YJM789) GN=RKI1 PE=3 SV=1	A6ZNU5|RPIA_YEAS7,Q12189|RPIA_YEAST	uniprot_sprot.fasta	28,258.9	100.0%	4	4	4	0.00694%	20.9%
40S ribosomal protein S28-B OS=Saccharomyces cerevisiae (strain ATCC 204508 / S288c) GN=RPS28B PE=1 SV=1	P0C0X0|RS28B_YEAST,Q3E7X9|RS28A_YEAST	uniprot_sprot.fasta	7,591.7	100.0%	4	4	4	0.00694%	47.8%
60S ribosomal protein L25 OS=Saccharomyces cerevisiae (strain ATCC 204508 / S288c) GN=RPL25 PE=1 SV=4	P04456|RL25_YEAST	uniprot_sprot.fasta	15,758.2	99.8%	2	3	4	0.00694%	18.3%
Homoserine kinase OS=Saccharomyces cerevisiae (strain ATCC 204508 / S288c) GN=THR1 PE=1 SV=4	P17423|KHSE_YEAST	uniprot_sprot.fasta	38,713.5	100.0%	3	3	4	0.00694%	9.24%
Phosphoribosylformylglycinamidine synthase OS=Saccharomyces cerevisiae (strain ATCC 204508 / S288c) GN=ADE6 PE=1 SV=2	P38972|PUR4_YEAST	uniprot_sprot.fasta	148,909.2	100.0%	3	3	4	0.00694%	3.61%
Homoserine dehydrogenase OS=Saccharomyces cerevisiae (strain ATCC 204508 / S288c) GN=HOM6 PE=1 SV=1	P31116|DHOM_YEAST	uniprot_sprot.fasta	38,503.2	100.0%	3	3	4	0.00694%	8.91%
Thioredoxin-2 OS=Saccharomyces cerevisiae (strain ATCC 204508 / S288c) GN=TRX2 PE=1 SV=3	P22803|TRX2_YEAST	uniprot_sprot.fasta	11,203.8	100.0%	3	3	4	0.00694%	35.6%
Small glutamine-rich tetratricopeptide repeat-containing protein 2 OS=Saccharomyces cerevisiae (strain ATCC 204508 / S288c) GN=SGT2 PE=1 SV=1	Q12118|SGT2_YEAST	uniprot_sprot.fasta	37,219.9	100.0%	3	3	4	0.00694%	12.1%
Phosphoglucomutase-2 OS=Saccharomyces cerevisiae (strain ATCC 204508 / S288c) GN=PGM2 PE=1 SV=1	P37012|PGM2_YEAST	uniprot_sprot.fasta	63,091.2	100.0%	3	3	4	0.00694%	6.85%
L-asparaginase 1 OS=Saccharomyces cerevisiae (strain ATCC 204508 / S288c) GN=ASP1 PE=1 SV=1	P38986|ASPG1_YEAST	uniprot_sprot.fasta	41,396.1	100.0%	3	3	4	0.00694%	8.92%
ATP-dependent RNA helicase DBP5 OS=Saccharomyces cerevisiae (strain YJM789) GN=DBP5 PE=3 SV=1	A6ZNQ1|DBP5_YEAS7,P20449|DBP5_YEAST	uniprot_sprot.fasta	53,875.8	100.0%	3	3	4	0.00694%	7.68%
NADPH dehydrogenase 2 OS=Saccharomyces cerevisiae (strain ATCC 204508 / S288c) GN=OYE2 PE=1 SV=3	Q03558|OYE2_YEAST	uniprot_sprot.fasta	45,012.0	100.0%	3	3	4	0.00694%	9.75%
Rotenone-insensitive NADH-ubiquinone oxidoreductase, mitochondrial OS=Saccharomyces cerevisiae (strain ATCC 204508 / S288c) GN=NDI1 PE=1 SV=1	P32340|NDI1_YEAST	uniprot_sprot.fasta	57,252.8	100.0%	3	3	4	0.00694%	5.85%
40S ribosomal protein S19-A OS=Saccharomyces cerevisiae (strain ATCC 204508 / S288c) GN=RPS19A PE=1 SV=2	P07280|RS19A_YEAST,P07281|RS19B_YEAST	uniprot_sprot.fasta	15,917.4	100.0%	3	3	4	0.00694%	16.0%
Anthranilate synthase component 1 OS=Saccharomyces cerevisiae (strain ATCC 204508 / S288c) GN=TRP2 PE=1 SV=4	P00899|TRPE_YEAST	uniprot_sprot.fasta	56,769.5	100.0%	3	3	4	0.00694%	7.69%
60S ribosomal protein L15-A OS=Saccharomyces cerevisiae (strain ATCC 204508 / S288c) GN=RPL15A PE=1 SV=3	P05748|RL15A_YEAST	uniprot_sprot.fasta	24,422.6	100.0%	3	3	4	0.00694%	12.7%
Glucokinase-1 OS=Saccharomyces cerevisiae (strain ATCC 204508 / S288c) GN=GLK1 PE=1 SV=1	P17709|HXKG_YEAST	uniprot_sprot.fasta	55,379.1	99.8%	2	2	4	0.00694%	5.00%
DNA-directed RNA polymerases I and III subunit RPAC1 OS=Saccharomyces cerevisiae (strain ATCC 204508 / S288c) GN=RPC40 PE=1 SV=1	P07703|RPAC1_YEAST	uniprot_sprot.fasta	37,687.6	99.8%	2	2	4	0.00694%	7.16%
Spermidine synthase OS=Saccharomyces cerevisiae (strain ATCC 204508 / S288c) GN=SPE3 PE=1 SV=1	Q12074|SPEE_YEAST	uniprot_sprot.fasta	33,324.4	99.8%	2	2	4	0.00694%	8.53%
DNA-directed RNA polymerases I and III subunit RPAC1 OS=Saccharomyces cerevisiae (strain ATCC 204508 / S288c) GN=RPC40 PE=1 SV=1	P07703|RPAC1_YEAST	uniprot_sprot.fasta	37,687.6	100.0%	4	4	4	0.00715%	15.8%
ATP synthase subunit 4, mitochondrial OS=Saccharomyces cerevisiae (strain ATCC 204508 / S288c) GN=ATP4 PE=1 SV=2	P05626|ATPF_YEAST	uniprot_sprot.fasta	26,925.5	100.0%	4	4	4	0.00715%	21.3%
60S ribosomal protein L17-A OS=Saccharomyces cerevisiae (strain ATCC 204508 / S288c) GN=RPL17A PE=1 SV=4	P05740|RL17A_YEAST	uniprot_sprot.fasta	20,549.6	100.0%	4	4	4	0.00715%	28.3%
Eukaryotic translation initiation factor 4E OS=Saccharomyces cerevisiae (strain ATCC 204508 / S288c) GN=CDC33 PE=1 SV=1	P07260|IF4E_YEAST	uniprot_sprot.fasta	24,254.6	100.0%	3	4	4	0.00715%	18.8%
60S ribosomal protein L6-B OS=Saccharomyces cerevisiae (strain ATCC 204508 / S288c) GN=RPL6B PE=1 SV=4	P05739|RL6B_YEAST	uniprot_sprot.fasta	19,986.9	100.0%	4	4	4	0.00715%	25.6%
DNA-directed RNA polymerase II subunit RPB1 OS=Saccharomyces cerevisiae (strain ATCC 204508 / S288c) GN=RPO21 PE=1 SV=2	P04050|RPB1_YEAST	uniprot_sprot.fasta	191,615.1	100.0%	4	4	4	0.00715%	2.89%
La protein homolog OS=Saccharomyces cerevisiae (strain ATCC 204508 / S288c) GN=LHP1 PE=1 SV=2	P33399|LHP1_YEAST	uniprot_sprot.fasta	32,104.9	100.0%	4	4	4	0.00715%	21.1%
Enoyl-[acyl-carrier protein] reductase [NADPH, B-specific], mitochondrial OS=Saccharomyces cerevisiae (strain ATCC 204508 / S288c) GN=ETR1 PE=1 SV=3	P38071|ETR1_YEAST	uniprot_sprot.fasta	42,068.0	100.0%	4	4	4	0.00715%	12.6%
60S ribosomal protein L30 OS=Saccharomyces cerevisiae (strain ATCC 204508 / S288c) GN=RPL30 PE=1 SV=3	P14120|RL30_YEAST	uniprot_sprot.fasta	11,416.0	100.0%	4	4	4	0.00715%	42.9%
Peptidyl-prolyl cis-trans isomerase C, mitochondrial OS=Saccharomyces cerevisiae (strain ATCC 204508 / S288c) GN=CPR3 PE=1 SV=1	P25719|CYPC_YEAST	uniprot_sprot.fasta	19,919.3	100.0%	4	4	4	0.00715%	18.7%
Anthranilate synthase component 1 OS=Saccharomyces cerevisiae (strain ATCC 204508 / S288c) GN=TRP2 PE=1 SV=4	P00899|TRPE_YEAST	uniprot_sprot.fasta	56,769.5	100.0%	4	4	4	0.00715%	10.5%
Ribose-5-phosphate isomerase OS=Saccharomyces cerevisiae (strain YJM789) GN=RKI1 PE=3 SV=1	A6ZNU5|RPIA_YEAS7,Q12189|RPIA_YEAST	uniprot_sprot.fasta	28,258.9	100.0%	4	4	4	0.00715%	20.9%
ABC transporter ATP-binding protein ARB1 OS=Saccharomyces cerevisiae (strain ATCC 204508 / S288c) GN=ARB1 PE=1 SV=1	P40024|ARB1_YEAST	uniprot_sprot.fasta	68,379.5	100.0%	4	4	4	0.00715%	7.70%
2-oxoglutarate dehydrogenase, mitochondrial OS=Saccharomyces cerevisiae (strain ATCC 204508 / S288c) GN=KGD1 PE=1 SV=2	P20967|ODO1_YEAST	uniprot_sprot.fasta	114,419.3	100.0%	4	4	4	0.00715%	4.73%
40S ribosomal protein S4-A OS=Saccharomyces cerevisiae (strain ATCC 204508 / S288c) GN=RPS4A PE=1 SV=1	P0CX35|RS4A_YEAST,P0CX36|RS4B_YEAST	uniprot_sprot.fasta	29,411.2	100.0%	3	3	4	0.00715%	12.3%
Inorganic phosphate transport protein PHO88 OS=Saccharomyces cerevisiae (strain ATCC 204508 / S288c) GN=PHO88 PE=1 SV=1	P38264|PHO88_YEAST	uniprot_sprot.fasta	21,138.0	100.0%	3	3	4	0.00715%	26.1%
Vacuolar aminopeptidase 1 OS=Saccharomyces cerevisiae (strain ATCC 204508 / S288c) GN=LAP4 PE=1 SV=2	P14904|AMPL_YEAST	uniprot_sprot.fasta	57,094.4	100.0%	3	3	4	0.00715%	7.98%
Phosphoribosylaminoimidazole-succinocarboxamide synthase OS=Saccharomyces cerevisiae (strain ATCC 204508 / S288c) GN=ADE1 PE=1 SV=2	P27616|PUR7_YEAST	uniprot_sprot.fasta	34,604.8	100.0%	3	3	4	0.00715%	11.8%
T-complex protein 1 subunit delta OS=Saccharomyces cerevisiae (strain ATCC 204508 / S288c) GN=CCT4 PE=1 SV=2	P39078|TCPD_YEAST	uniprot_sprot.fasta	57,605.6	100.0%	3	3	4	0.00715%	8.71%
Coatomer subunit alpha OS=Saccharomyces cerevisiae (strain ATCC 204508 / S288c) GN=COP1 PE=1 SV=2	P53622|COPA_YEAST	uniprot_sprot.fasta	135,611.2	100.0%	3	3	4	0.00715%	3.00%
Ubiquitin-40S ribosomal protein S31 OS=Saccharomyces cerevisiae (strain ATCC 204508 / S288c) GN=RPS31 PE=1 SV=3	P05759|RS27A_YEAST	uniprot_sprot.fasta	17,216.6	100.0%	3	3	4	0.00715%	15.1%
60S ribosomal protein L7-A OS=Saccharomyces cerevisiae (strain ATCC 204508 / S288c) GN=RPL7A PE=1 SV=3	P05737|RL7A_YEAST,Q12213|RL7B_YEAST	uniprot_sprot.fasta	27,639.6	100.0%	3	3	4	0.00715%	11.9%
RuvB-like protein 2 OS=Saccharomyces cerevisiae (strain ATCC 204508 / S288c) GN=RVB2 PE=1 SV=1	Q12464|RUVB2_YEAST	uniprot_sprot.fasta	51,613.1	99.8%	2	2	4	0.00715%	4.88%
Bifunctional purine biosynthesis protein ADE17 OS=Saccharomyces cerevisiae (strain ATCC 204508 / S288c) GN=ADE17 PE=1 SV=2	P38009|PUR92_YEAST	uniprot_sprot.fasta	65,264.7	99.8%	2	2	4	0.00715%	4.56%
Sister chromatid cohesion protein PDS5 OS=Saccharomyces cerevisiae (strain ATCC 204508 / S288c) GN=PDS5 PE=1 SV=1	Q04264|PDS5_YEAST	uniprot_sprot.fasta	147,051.7	99.8%	2	2	4	0.00715%	1.64%
Glucose-6-phosphate 1-dehydrogenase OS=Saccharomyces cerevisiae (strain ATCC 204508 / S288c) GN=ZWF1 PE=1 SV=4	P11412|G6PD_YEAST	uniprot_sprot.fasta	57,523.6	100.0%	3	4	4	0.00785%	9.90%
Cytochrome c peroxidase, mitochondrial OS=Saccharomyces cerevisiae (strain ATCC 204508 / S288c) GN=CCP1 PE=1 SV=2	P00431|CCPR_YEAST	uniprot_sprot.fasta	40,354.4	100.0%	4	4	4	0.00785%	17.2%
40S ribosomal protein S18-A OS=Saccharomyces cerevisiae (strain ATCC 204508 / S288c) GN=RPS18A PE=1 SV=1	P0CX55|RS18A_YEAST,P0CX56|RS18B_YEAST	uniprot_sprot.fasta	17,037.9	100.0%	4	4	4	0.00785%	32.9%
NADH-cytochrome b5 reductase 1 OS=Saccharomyces cerevisiae (strain YJM789) GN=CBR1 PE=3 SV=2	A6ZVM6|NCB5R_YEAS7,P38626|NCB5R_YEAST	uniprot_sprot.fasta	31,422.6	100.0%	4	4	4	0.00785%	14.1%
Phosphoribosylformylglycinamidine synthase OS=Saccharomyces cerevisiae (strain ATCC 204508 / S288c) GN=ADE6 PE=1 SV=2	P38972|PUR4_YEAST	uniprot_sprot.fasta	148,909.2	100.0%	4	4	4	0.00785%	2.65%
NAD-specific glutamate dehydrogenase OS=Saccharomyces cerevisiae (strain ATCC 204508 / S288c) GN=GDH2 PE=1 SV=1	P33327|DHE2_YEAST	uniprot_sprot.fasta	124,339.2	100.0%	4	4	4	0.00785%	4.76%
Eukaryotic translation initiation factor 4E OS=Saccharomyces cerevisiae (strain ATCC 204508 / S288c) GN=CDC33 PE=1 SV=1	P07260|IF4E_YEAST	uniprot_sprot.fasta	24,254.6	100.0%	4	4	4	0.00785%	17.8%
60S ribosomal protein L6-B OS=Saccharomyces cerevisiae (strain ATCC 204508 / S288c) GN=RPL6B PE=1 SV=4	P05739|RL6B_YEAST	uniprot_sprot.fasta	19,986.9	100.0%	4	4	4	0.00785%	25.6%
Uracil phosphoribosyltransferase OS=Saccharomyces cerevisiae (strain ATCC 204508 / S288c) GN=FUR1 PE=1 SV=2	P18562|UPP_YEAST	uniprot_sprot.fasta	24,595.5	100.0%	4	4	4	0.00785%	24.5%
ATP synthase subunit d, mitochondrial OS=Saccharomyces cerevisiae (strain ATCC 204508 / S288c) GN=ATP7 PE=1 SV=2	P30902|ATP7_YEAST	uniprot_sprot.fasta	19,810.2	100.0%	4	4	4	0.00785%	21.8%
Enoyl-[acyl-carrier protein] reductase [NADPH, B-specific], mitochondrial OS=Saccharomyces cerevisiae (strain ATCC 204508 / S288c) GN=ETR1 PE=1 SV=3	P38071|ETR1_YEAST	uniprot_sprot.fasta	42,068.0	100.0%	4	4	4	0.00785%	12.6%
Pentafunctional AROM polypeptide OS=Saccharomyces cerevisiae (strain YJM789) GN=ARO1 PE=3 SV=1	A6ZY89|ARO1_YEAS7,B3LGE9|ARO1_YEAS1,C7GIN5|ARO1_YEAS2,C8Z543|ARO1_YEAS8,P08566|ARO1_YEAST	uniprot_sprot.fasta	174,770.1	100.0%	4	4	4	0.00785%	3.27%
Heat shock protein 78, mitochondrial OS=Saccharomyces cerevisiae (strain ATCC 204508 / S288c) GN=HSP78 PE=1 SV=2	P33416|HSP78_YEAST	uniprot_sprot.fasta	91,340.8	100.0%	4	4	4	0.00785%	7.03%
Altered inheritance of mitochondria protein 9, mitochondrial OS=Saccharomyces cerevisiae (strain YJM789) GN=AIM9 PE=3 SV=1	A6ZR36|AIM9_YEAS7,B3LRJ8|AIM9_YEAS1,C7GRR3|AIM9_YEAS2,C8Z792|AIM9_YEAS8,P40053|AIM9_YEAST	uniprot_sprot.fasta	72,393.3	100.0%	4	4	4	0.00785%	8.45%
DNA-directed RNA polymerase I subunit RPA34 OS=Saccharomyces cerevisiae (strain ATCC 204508 / S288c) GN=RPA34 PE=1 SV=1	P47006|RPA34_YEAST	uniprot_sprot.fasta	26,876.5	100.0%	3	3	4	0.00785%	15.9%
Cysteine proteinase 1, mitochondrial OS=Saccharomyces cerevisiae (strain YJM789) GN=LAP3 PE=3 SV=2	A6ZRK4|BLH1_YEAS7,B3LP78|BLH1_YEAS1,B5VQH0|BLH1_YEAS6,C7GPC1|BLH1_YEAS2,C8ZFZ7|BLH1_YEAS8,Q01532|BLH1_YEAST	uniprot_sprot.fasta	55,485.4	100.0%	3	3	4	0.00785%	10.1%
Thioredoxin-2 OS=Saccharomyces cerevisiae (strain ATCC 204508 / S288c) GN=TRX2 PE=1 SV=3	P22803|TRX2_YEAST	uniprot_sprot.fasta	11,203.8	100.0%	3	3	4	0.00785%	35.6%
Eukaryotic translation initiation factor 2 subunit gamma OS=Saccharomyces cerevisiae (strain ATCC 204508 / S288c) GN=GCD11 PE=1 SV=1	P32481|IF2G_YEAST	uniprot_sprot.fasta	57,867.2	100.0%	3	3	4	0.00785%	7.97%
ATP-dependent RNA helicase DBP2 OS=Saccharomyces cerevisiae (strain YJM789) GN=DBP2 PE=3 SV=1	A6ZRX0|DBP2_YEAS7,P24783|DBP2_YEAST	uniprot_sprot.fasta	60,987.1	99.8%	2	2	4	0.00785%	8.06%
Probable 2-methylcitrate dehydratase OS=Saccharomyces cerevisiae (strain ATCC 204508 / S288c) GN=PDH1 PE=1 SV=1	Q12428|PRPD_YEAST	uniprot_sprot.fasta	57,685.7	99.8%	2	2	4	0.00785%	4.46%
FK506-binding protein 1 OS=Saccharomyces cerevisiae (strain ATCC 204508 / S288c) GN=FPR1 PE=1 SV=2	P20081|FKBP_YEAST	uniprot_sprot.fasta	12,158.1	100.0%	5	5	5	0.00868%	47.4%
Ubiquitin-activating enzyme E1 1 OS=Saccharomyces cerevisiae (strain ATCC 204508 / S288c) GN=UBA1 PE=1 SV=2	P22515|UBA1_YEAST	uniprot_sprot.fasta	114,270.4	100.0%	5	5	5	0.00868%	7.91%
Proteasome component C7-alpha OS=Saccharomyces cerevisiae (strain ATCC 204508 / S288c) GN=SCL1 PE=1 SV=1	P21243|PSA6_YEAST	uniprot_sprot.fasta	28,001.5	100.0%	5	5	5	0.00868%	22.6%
NADPH-dependent alpha-keto amide reductase OS=Saccharomyces cerevisiae (strain ATCC 204508 / S288c) GN=YDL124W PE=1 SV=1	Q07551|KAR_YEAST	uniprot_sprot.fasta	35,562.0	100.0%	5	5	5	0.00868%	18.3%
Sterol 24-C-methyltransferase OS=Saccharomyces cerevisiae (strain ATCC 204508 / S288c) GN=ERG6 PE=1 SV=4	P25087|ERG6_YEAST	uniprot_sprot.fasta	43,431.6	100.0%	5	5	5	0.00868%	15.7%
Heat shock protein 26 OS=Saccharomyces cerevisiae (strain ATCC 204508 / S288c) GN=HSP26 PE=1 SV=3	P15992|HSP26_YEAST	uniprot_sprot.fasta	23,880.2	100.0%	4	5	5	0.00868%	27.1%
Glycerol-3-phosphate dehydrogenase, mitochondrial OS=Saccharomyces cerevisiae (strain ATCC 204508 / S288c) GN=GUT2 PE=1 SV=2	P32191|GPDM_YEAST	uniprot_sprot.fasta	72,390.6	100.0%	5	5	5	0.00868%	9.09%
ATP synthase subunit 5, mitochondrial OS=Saccharomyces cerevisiae (strain ATCC 204508 / S288c) GN=ATP5 PE=1 SV=1	P09457|ATPO_YEAST	uniprot_sprot.fasta	22,815.3	100.0%	4	5	5	0.00868%	23.1%
Uncharacterized protein YNR034W-A OS=Saccharomyces cerevisiae (strain ATCC 204508 / S288c) GN=YNR034W-A PE=1 SV=1	Q3E841|YN034_YEAST	uniprot_sprot.fasta	10,781.7	100.0%	5	5	5	0.00868%	34.7%
Aspartate aminotransferase, cytoplasmic OS=Saccharomyces cerevisiae (strain ATCC 204508 / S288c) GN=AAT2 PE=1 SV=3	P23542|AATC_YEAST	uniprot_sprot.fasta	46,058.6	100.0%	5	5	5	0.00868%	17.2%
Vacuolar aminopeptidase 1 OS=Saccharomyces cerevisiae (strain ATCC 204508 / S288c) GN=LAP4 PE=1 SV=2	P14904|AMPL_YEAST	uniprot_sprot.fasta	57,094.4	100.0%	4	4	5	0.00868%	10.9%
Glutamine--tRNA ligase OS=Saccharomyces cerevisiae (strain ATCC 204508 / S288c) GN=GLN4 PE=1 SV=2	P13188|SYQ_YEAST	uniprot_sprot.fasta	93,135.0	100.0%	4	4	5	0.00868%	5.19%
ATP-dependent RNA helicase DBP2 OS=Saccharomyces cerevisiae (strain YJM789) GN=DBP2 PE=3 SV=1	A6ZRX0|DBP2_YEAS7,P24783|DBP2_YEAST	uniprot_sprot.fasta	60,987.1	100.0%	4	4	5	0.00868%	10.1%
Isocitrate dehydrogenase [NADP] cytoplasmic OS=Saccharomyces cerevisiae (strain ATCC 204508 / S288c) GN=IDP2 PE=1 SV=2	P41939|IDHC_YEAST	uniprot_sprot.fasta	46,563.8	100.0%	3	4	5	0.00868%	13.8%
Serine hydroxymethyltransferase, mitochondrial OS=Saccharomyces cerevisiae (strain ATCC 204508 / S288c) GN=SHM1 PE=1 SV=2	P37292|GLYM_YEAST	uniprot_sprot.fasta	53,688.0	100.0%	4	4	5	0.00868%	10.2%
Cysteine proteinase 1, mitochondrial OS=Saccharomyces cerevisiae (strain YJM789) GN=LAP3 PE=3 SV=2	A6ZRK4|BLH1_YEAS7,B3LP78|BLH1_YEAS1,B5VQH0|BLH1_YEAS6,C7GPC1|BLH1_YEAS2,C8ZFZ7|BLH1_YEAS8,Q01532|BLH1_YEAST	uniprot_sprot.fasta	55,485.4	100.0%	4	4	5	0.00868%	12.4%
Coatomer subunit alpha OS=Saccharomyces cerevisiae (strain ATCC 204508 / S288c) GN=COP1 PE=1 SV=2	P53622|COPA_YEAST	uniprot_sprot.fasta	135,611.2	100.0%	4	4	5	0.00868%	3.83%
26S protease regulatory subunit 4 homolog OS=Saccharomyces cerevisiae (strain ATCC 204508 / S288c) GN=RPT2 PE=1 SV=3	P40327|PRS4_YEAST	uniprot_sprot.fasta	48,830.5	100.0%	4	4	5	0.00868%	10.1%
Eukaryotic translation initiation factor 3 subunit B OS=Saccharomyces cerevisiae (strain YJM789) GN=PRT1 PE=3 SV=1	A6ZPJ1|EIF3B_YEAS7,P06103|EIF3B_YEAST	uniprot_sprot.fasta	88,330.8	100.0%	4	4	5	0.00868%	5.36%
4-aminobutyrate aminotransferase OS=Saccharomyces cerevisiae (strain ATCC 204508 / S288c) GN=UGA1 PE=1 SV=2	P17649|GABAT_YEAST	uniprot_sprot.fasta	52,948.6	100.0%	4	4	5	0.00868%	8.07%
Bifunctional purine biosynthesis protein ADE17 OS=Saccharomyces cerevisiae (strain ATCC 204508 / S288c) GN=ADE17 PE=1 SV=2	P38009|PUR92_YEAST	uniprot_sprot.fasta	65,264.7	100.0%	4	4	5	0.00868%	8.78%
F-actin-capping protein subunit beta OS=Saccharomyces cerevisiae (strain ATCC 204508 / S288c) GN=CAP2 PE=1 SV=3	P13517|CAPZB_YEAST	uniprot_sprot.fasta	32,630.4	100.0%	4	4	5	0.00868%	20.2%
Farnesyl pyrophosphate synthase OS=Saccharomyces cerevisiae (strain ATCC 204508 / S288c) GN=ERG20 PE=1 SV=2	P08524|FPPS_YEAST	uniprot_sprot.fasta	40,485.3	100.0%	3	3	5	0.00868%	8.81%
ATP synthase subunit 4, mitochondrial OS=Saccharomyces cerevisiae (strain ATCC 204508 / S288c) GN=ATP4 PE=1 SV=2	P05626|ATPF_YEAST	uniprot_sprot.fasta	26,925.5	100.0%	3	3	5	0.00868%	14.8%
Transcription elongation factor SPT5 OS=Saccharomyces cerevisiae (strain ATCC 204508 / S288c) GN=SPT5 PE=1 SV=1	P27692|SPT5_YEAST	uniprot_sprot.fasta	115,651.4	100.0%	3	3	5	0.00868%	4.70%
40S ribosomal protein S12 OS=Saccharomyces cerevisiae (strain ATCC 204508 / S288c) GN=RPS12 PE=1 SV=1	P48589|RS12_YEAST	uniprot_sprot.fasta	15,470.9	100.0%	3	3	5	0.00868%	25.9%
RuvB-like protein 2 OS=Saccharomyces cerevisiae (strain ATCC 204508 / S288c) GN=RVB2 PE=1 SV=1	Q12464|RUVB2_YEAST	uniprot_sprot.fasta	51,613.1	99.8%	2	2	5	0.00868%	4.88%
Tubulin alpha-1 chain OS=Saccharomyces cerevisiae (strain ATCC 204508 / S288c) GN=TUB1 PE=1 SV=2	P09733|TBA1_YEAST	uniprot_sprot.fasta	49,800.2	99.8%	2	2	5	0.00868%	6.94%
Glucose-6-phosphate 1-dehydrogenase OS=Saccharomyces cerevisiae (strain ATCC 204508 / S288c) GN=ZWF1 PE=1 SV=4	P11412|G6PD_YEAST	uniprot_sprot.fasta	57,523.6	100.0%	4	5	5	0.00893%	12.1%
40S ribosomal protein S18-A OS=Saccharomyces cerevisiae (strain ATCC 204508 / S288c) GN=RPS18A PE=1 SV=1	P0CX55|RS18A_YEAST,P0CX56|RS18B_YEAST	uniprot_sprot.fasta	17,037.9	100.0%	5	5	5	0.00893%	40.4%
Proteasome component C7-alpha OS=Saccharomyces cerevisiae (strain ATCC 204508 / S288c) GN=SCL1 PE=1 SV=1	P21243|PSA6_YEAST	uniprot_sprot.fasta	28,001.5	100.0%	5	5	5	0.00893%	23.0%
T-complex protein 1 subunit eta OS=Saccharomyces cerevisiae (strain ATCC 204508 / S288c) GN=CCT7 PE=1 SV=1	P42943|TCPH_YEAST	uniprot_sprot.fasta	59,737.1	100.0%	5	5	5	0.00893%	11.5%
60S ribosomal protein L2-A OS=Saccharomyces cerevisiae (strain ATCC 204508 / S288c) GN=RPL2A PE=1 SV=1	P0CX45|RL2A_YEAST,P0CX46|RL2B_YEAST	uniprot_sprot.fasta	27,408.9	100.0%	4	5	5	0.00893%	14.6%
Succinyl-CoA ligase [ADP-forming] subunit beta, mitochondrial OS=Saccharomyces cerevisiae (strain ATCC 204508 / S288c) GN=LSC2 PE=1 SV=1	P53312|SUCB_YEAST	uniprot_sprot.fasta	46,902.1	100.0%	5	5	5	0.00893%	18.5%
Aminopeptidase 2, mitochondrial OS=Saccharomyces cerevisiae (strain ATCC 204508 / S288c) GN=APE2 PE=1 SV=4	P32454|APE2_YEAST	uniprot_sprot.fasta	107,758.3	100.0%	5	5	5	0.00893%	7.67%
60S ribosomal protein L9-A OS=Saccharomyces cerevisiae (strain ATCC 204508 / S288c) GN=RPL9A PE=1 SV=2	P05738|RL9A_YEAST	uniprot_sprot.fasta	21,568.8	100.0%	3	4	5	0.00893%	15.2%
Glutamine--tRNA ligase OS=Saccharomyces cerevisiae (strain ATCC 204508 / S288c) GN=GLN4 PE=1 SV=2	P13188|SYQ_YEAST	uniprot_sprot.fasta	93,135.0	100.0%	4	4	5	0.00893%	4.94%
60S ribosomal protein L25 OS=Saccharomyces cerevisiae (strain ATCC 204508 / S288c) GN=RPL25 PE=1 SV=4	P04456|RL25_YEAST	uniprot_sprot.fasta	15,758.2	100.0%	4	4	5	0.00893%	28.9%
T-complex protein 1 subunit theta OS=Saccharomyces cerevisiae (strain ATCC 204508 / S288c) GN=CCT8 PE=1 SV=1	P47079|TCPQ_YEAST	uniprot_sprot.fasta	61,663.6	100.0%	4	4	5	0.00893%	8.98%
Thioredoxin-2 OS=Saccharomyces cerevisiae (strain ATCC 204508 / S288c) GN=TRX2 PE=1 SV=3	P22803|TRX2_YEAST	uniprot_sprot.fasta	11,203.8	100.0%	4	4	5	0.00893%	51.9%
Small glutamine-rich tetratricopeptide repeat-containing protein 2 OS=Saccharomyces cerevisiae (strain ATCC 204508 / S288c) GN=SGT2 PE=1 SV=1	Q12118|SGT2_YEAST	uniprot_sprot.fasta	37,219.9	100.0%	4	4	5	0.00893%	16.2%
Transaldolase NQM1 OS=Saccharomyces cerevisiae (strain ATCC 204508 / S288c) GN=NQM1 PE=1 SV=1	P53228|TAL2_YEAST	uniprot_sprot.fasta	37,254.8	100.0%	4	4	5	0.00893%	13.8%
Ribonucleoside-diphosphate reductase small chain 1 OS=Saccharomyces cerevisiae (strain ATCC 204508 / S288c) GN=RNR2 PE=1 SV=2	P09938|RIR2_YEAST	uniprot_sprot.fasta	46,149.4	100.0%	4	4	5	0.00893%	13.5%
26S proteasome regulatory subunit RPN2 OS=Saccharomyces cerevisiae (strain ATCC 204508 / S288c) GN=RPN2 PE=1 SV=4	P32565|RPN2_YEAST	uniprot_sprot.fasta	104,237.0	100.0%	4	4	5	0.00893%	4.23%
Spermidine synthase OS=Saccharomyces cerevisiae (strain ATCC 204508 / S288c) GN=SPE3 PE=1 SV=1	Q12074|SPEE_YEAST	uniprot_sprot.fasta	33,324.4	100.0%	3	4	5	0.00893%	11.9%
Adenylate kinase 1 OS=Saccharomyces cerevisiae (strain YJM789) GN=ADK1 PE=3 SV=1	A6ZYI0|KAD1_YEAS7,B3LG61|KAD1_YEAS1,P07170|KAD1_YEAST	uniprot_sprot.fasta	24,255.8	100.0%	3	4	5	0.00893%	17.1%
Acetyl-coenzyme A synthetase 2 OS=Saccharomyces cerevisiae (strain ATCC 204508 / S288c) GN=ACS2 PE=1 SV=1	P52910|ACS2_YEAST	uniprot_sprot.fasta	75,492.2	100.0%	3	3	5	0.00893%	4.25%
Tubulin alpha-1 chain OS=Saccharomyces cerevisiae (strain ATCC 204508 / S288c) GN=TUB1 PE=1 SV=2	P09733|TBA1_YEAST	uniprot_sprot.fasta	49,800.2	100.0%	3	3	5	0.00893%	10.3%
Low-affinity Fe(2+) transport protein OS=Saccharomyces cerevisiae (strain ATCC 204508 / S288c) GN=FET4 PE=1 SV=2	P40988|FET4_YEAST	uniprot_sprot.fasta	62,793.3	100.0%	3	3	5	0.00893%	6.88%
RNA polymerase-associated protein CTR9 OS=Saccharomyces cerevisiae (strain ATCC 204508 / S288c) GN=CTR9 PE=1 SV=3	P89105|CTR9_YEAST	uniprot_sprot.fasta	124,717.2	100.0%	3	3	5	0.00893%	2.51%
40S ribosomal protein S17-A OS=Saccharomyces cerevisiae (strain ATCC 204508 / S288c) GN=RPS17A PE=1 SV=1	P02407|RS17A_YEAST,P14127|RS17B_YEAST	uniprot_sprot.fasta	15,788.9	100.0%	3	3	5	0.00893%	31.6%
Actin-binding protein OS=Saccharomyces cerevisiae (strain ATCC 204508 / S288c) GN=ABP1 PE=1 SV=4	P15891|ABP1_YEAST	uniprot_sprot.fasta	65,578.2	99.9%	2	2	5	0.00893%	6.93%
Methionine--tRNA ligase, cytoplasmic OS=Saccharomyces cerevisiae (strain ATCC 204508 / S288c) GN=MES1 PE=1 SV=4	P00958|SYMC_YEAST	uniprot_sprot.fasta	85,680.9	99.8%	2	2	5	0.00893%	3.73%
Asparagine synthetase [glutamine-hydrolyzing] 1 OS=Saccharomyces cerevisiae (strain ATCC 204508 / S288c) GN=ASN1 PE=1 SV=2	P49089|ASNS1_YEAST	uniprot_sprot.fasta	64,472.9	99.9%	2	2	5	0.00893%	10.5%
FK506-binding protein 1 OS=Saccharomyces cerevisiae (strain ATCC 204508 / S288c) GN=FPR1 PE=1 SV=2	P20081|FKBP_YEAST	uniprot_sprot.fasta	12,158.1	100.0%	4	5	5	0.00981%	24.6%
Vacuolar aminopeptidase 1 OS=Saccharomyces cerevisiae (strain ATCC 204508 / S288c) GN=LAP4 PE=1 SV=2	P14904|AMPL_YEAST	uniprot_sprot.fasta	57,094.4	100.0%	5	5	5	0.00981%	12.6%
Orotate phosphoribosyltransferase 1 OS=Saccharomyces cerevisiae (strain ATCC 204508 / S288c) GN=URA5 PE=1 SV=2	P13298|PYRE_YEAST	uniprot_sprot.fasta	24,666.0	100.0%	4	5	5	0.00981%	26.1%
60S ribosomal protein L27-A OS=Saccharomyces cerevisiae (strain ATCC 204508 / S288c) GN=RPL27A PE=1 SV=1	P0C2H6|RL27A_YEAST,P0C2H7|RL27B_YEAST	uniprot_sprot.fasta	15,531.2	100.0%	4	5	5	0.00981%	32.4%
Protein disulfide-isomerase OS=Saccharomyces cerevisiae (strain ATCC 204508 / S288c) GN=PDI1 PE=1 SV=2	P17967|PDI_YEAST	uniprot_sprot.fasta	58,228.2	100.0%	4	5	5	0.00981%	10.9%
NADPH-dependent alpha-keto amide reductase OS=Saccharomyces cerevisiae (strain ATCC 204508 / S288c) GN=YDL124W PE=1 SV=1	Q07551|KAR_YEAST	uniprot_sprot.fasta	35,562.0	100.0%	5	5	5	0.00981%	18.3%
Succinyl-CoA ligase [ADP-forming] subunit beta, mitochondrial OS=Saccharomyces cerevisiae (strain ATCC 204508 / S288c) GN=LSC2 PE=1 SV=1	P53312|SUCB_YEAST	uniprot_sprot.fasta	46,902.1	100.0%	5	5	5	0.00981%	16.4%
10 kDa heat shock protein, mitochondrial OS=Saccharomyces cerevisiae (strain ATCC 204508 / S288c) GN=HSP10 PE=1 SV=1	P38910|CH10_YEAST	uniprot_sprot.fasta	11,372.4	100.0%	4	5	5	0.00981%	38.7%
Sterol 24-C-methyltransferase OS=Saccharomyces cerevisiae (strain ATCC 204508 / S288c) GN=ERG6 PE=1 SV=4	P25087|ERG6_YEAST	uniprot_sprot.fasta	43,431.6	100.0%	5	5	5	0.00981%	12.5%
T-complex protein 1 subunit eta OS=Saccharomyces cerevisiae (strain ATCC 204508 / S288c) GN=CCT7 PE=1 SV=1	P42943|TCPH_YEAST	uniprot_sprot.fasta	59,737.1	100.0%	5	5	5	0.00981%	11.1%
Alpha-soluble NSF attachment protein OS=Saccharomyces cerevisiae (strain ATCC 204508 / S288c) GN=SEC17 PE=1 SV=4	P32602|SEC17_YEAST	uniprot_sprot.fasta	32,804.4	100.0%	5	5	5	0.00981%	20.9%
C-1-tetrahydrofolate synthase, cytoplasmic OS=Saccharomyces cerevisiae (strain ATCC 204508 / S288c) GN=ADE3 PE=1 SV=1	P07245|C1TC_YEAST	uniprot_sprot.fasta	102,207.3	100.0%	5	5	5	0.00981%	7.40%
RNA polymerase-associated protein CTR9 OS=Saccharomyces cerevisiae (strain ATCC 204508 / S288c) GN=CTR9 PE=1 SV=3	P89105|CTR9_YEAST	uniprot_sprot.fasta	124,717.2	100.0%	5	5	5	0.00981%	4.92%
Glutamate synthase [NADH] OS=Saccharomyces cerevisiae (strain ATCC 204508 / S288c) GN=GLT1 PE=1 SV=2	Q12680|GLT1_YEAST	uniprot_sprot.fasta	238,108.3	100.0%	5	5	5	0.00981%	2.66%
Sister chromatid cohesion protein PDS5 OS=Saccharomyces cerevisiae (strain ATCC 204508 / S288c) GN=PDS5 PE=1 SV=1	Q04264|PDS5_YEAST	uniprot_sprot.fasta	147,051.7	100.0%	5	5	5	0.00981%	4.31%
Aspartate aminotransferase, cytoplasmic OS=Saccharomyces cerevisiae (strain ATCC 204508 / S288c) GN=AAT2 PE=1 SV=3	P23542|AATC_YEAST	uniprot_sprot.fasta	46,058.6	100.0%	5	5	5	0.00981%	15.6%
Cytochrome b2, mitochondrial OS=Saccharomyces cerevisiae (strain ATCC 204508 / S288c) GN=CYB2 PE=1 SV=1	P00175|CYB2_YEAST	uniprot_sprot.fasta	65,541.2	100.0%	4	5	5	0.00981%	10.2%
DNA-directed RNA polymerase III subunit RPC1 OS=Saccharomyces cerevisiae (strain ATCC 204508 / S288c) GN=RPO31 PE=1 SV=1	P04051|RPC1_YEAST	uniprot_sprot.fasta	162,306.1	100.0%	4	5	5	0.00981%	4.25%
26S proteasome regulatory subunit RPN9 OS=Saccharomyces cerevisiae (strain ATCC 204508 / S288c) GN=RPN9 PE=1 SV=1	Q04062|RPN9_YEAST	uniprot_sprot.fasta	45,785.8	100.0%	4	4	5	0.00981%	10.2%
Farnesyl pyrophosphate synthase OS=Saccharomyces cerevisiae (strain ATCC 204508 / S288c) GN=ERG20 PE=1 SV=2	P08524|FPPS_YEAST	uniprot_sprot.fasta	40,485.3	100.0%	4	4	5	0.00981%	12.2%
60S ribosomal protein L25 OS=Saccharomyces cerevisiae (strain ATCC 204508 / S288c) GN=RPL25 PE=1 SV=4	P04456|RL25_YEAST	uniprot_sprot.fasta	15,758.2	100.0%	4	4	5	0.00981%	36.6%
Proteasome component C7-alpha OS=Saccharomyces cerevisiae (strain ATCC 204508 / S288c) GN=SCL1 PE=1 SV=1	P21243|PSA6_YEAST	uniprot_sprot.fasta	28,001.5	100.0%	4	4	5	0.00981%	18.7%
Tubulin alpha-1 chain OS=Saccharomyces cerevisiae (strain ATCC 204508 / S288c) GN=TUB1 PE=1 SV=2	P09733|TBA1_YEAST	uniprot_sprot.fasta	49,800.2	100.0%	4	4	5	0.00981%	12.3%
Pyruvate dehydrogenase E1 component subunit alpha, mitochondrial OS=Saccharomyces cerevisiae (strain ATCC 204508 / S288c) GN=PDA1 PE=1 SV=2	P16387|ODPA_YEAST	uniprot_sprot.fasta	46,344.4	100.0%	4	4	5	0.00981%	12.6%
Phosphoglucomutase-2 OS=Saccharomyces cerevisiae (strain ATCC 204508 / S288c) GN=PGM2 PE=1 SV=1	P37012|PGM2_YEAST	uniprot_sprot.fasta	63,091.2	100.0%	4	4	5	0.00981%	8.79%
Alpha,alpha-trehalose-phosphate synthase [UDP-forming] 56 kDa subunit OS=Saccharomyces cerevisiae (strain ATCC 204508 / S288c) GN=TPS1 PE=1 SV=2	Q00764|TPS1_YEAST	uniprot_sprot.fasta	56,148.3	100.0%	3	4	5	0.00981%	7.27%
Ras-related protein SEC4 OS=Saccharomyces cerevisiae (strain ATCC 204508 / S288c) GN=SEC4 PE=1 SV=1	P07560|SEC4_YEAST	uniprot_sprot.fasta	23,506.6	100.0%	4	4	5	0.00981%	21.4%
ATP-dependent RNA helicase DBP5 OS=Saccharomyces cerevisiae (strain YJM789) GN=DBP5 PE=3 SV=1	A6ZNQ1|DBP5_YEAS7,P20449|DBP5_YEAST	uniprot_sprot.fasta	53,875.8	100.0%	4	4	5	0.00981%	10.4%
Rotenone-insensitive NADH-ubiquinone oxidoreductase, mitochondrial OS=Saccharomyces cerevisiae (strain ATCC 204508 / S288c) GN=NDI1 PE=1 SV=1	P32340|NDI1_YEAST	uniprot_sprot.fasta	57,252.8	100.0%	4	4	5	0.00981%	6.04%
Actin-like protein ARP9 OS=Saccharomyces cerevisiae (strain ATCC 204508 / S288c) GN=ARP9 PE=1 SV=1	Q05123|ARP9_YEAST	uniprot_sprot.fasta	53,076.7	100.0%	4	4	5	0.00981%	8.57%
Ribose-5-phosphate isomerase OS=Saccharomyces cerevisiae (strain YJM789) GN=RKI1 PE=3 SV=1	A6ZNU5|RPIA_YEAS7,Q12189|RPIA_YEAST	uniprot_sprot.fasta	28,258.9	100.0%	4	4	5	0.00981%	20.9%
40S ribosomal protein S28-B OS=Saccharomyces cerevisiae (strain ATCC 204508 / S288c) GN=RPS28B PE=1 SV=1	P0C0X0|RS28B_YEAST,Q3E7X9|RS28A_YEAST	uniprot_sprot.fasta	7,591.7	100.0%	4	4	5	0.00981%	41.8%
Vacuolar transporter chaperone 4 OS=Saccharomyces cerevisiae (strain ATCC 204508 / S288c) GN=VTC4 PE=1 SV=2	P47075|VTC4_YEAST	uniprot_sprot.fasta	83,157.5	100.0%	4	4	5	0.00981%	5.69%
Glycogen phosphorylase OS=Saccharomyces cerevisiae (strain ATCC 204508 / S288c) GN=GPH1 PE=1 SV=4	P06738|PHSG_YEAST	uniprot_sprot.fasta	103,279.2	100.0%	3	4	5	0.00981%	4.77%
DNA-directed RNA polymerases I and III subunit RPAC1 OS=Saccharomyces cerevisiae (strain ATCC 204508 / S288c) GN=RPC40 PE=1 SV=1	P07703|RPAC1_YEAST	uniprot_sprot.fasta	37,687.6	100.0%	3	3	5	0.00981%	10.7%
Acetyl-coenzyme A synthetase 1 OS=Saccharomyces cerevisiae (strain ATCC 204508 / S288c) GN=ACS1 PE=1 SV=2	Q01574|ACS1_YEAST	uniprot_sprot.fasta	79,142.5	100.0%	3	3	5	0.00981%	2.81%
Bifunctional purine biosynthesis protein ADE17 OS=Saccharomyces cerevisiae (strain ATCC 204508 / S288c) GN=ADE17 PE=1 SV=2	P38009|PUR92_YEAST	uniprot_sprot.fasta	65,264.7	100.0%	3	3	5	0.00981%	7.60%
60S ribosomal protein L7-A OS=Saccharomyces cerevisiae (strain ATCC 204508 / S288c) GN=RPL7A PE=1 SV=3	P05737|RL7A_YEAST,Q12213|RL7B_YEAST	uniprot_sprot.fasta	27,639.6	100.0%	3	3	5	0.00981%	11.9%
Zuotin OS=Saccharomyces cerevisiae (strain ATCC 204508 / S288c) GN=ZUO1 PE=1 SV=1	P32527|ZUO1_YEAST	uniprot_sprot.fasta	49,021.5	100.0%	5	5	6	0.0104%	14.8%
Aminopeptidase Y OS=Saccharomyces cerevisiae (strain ATCC 204508 / S288c) GN=APE3 PE=1 SV=1	P37302|APE3_YEAST	uniprot_sprot.fasta	60,139.2	100.0%	4	5	6	0.0104%	14.3%
Acetyl-coenzyme A synthetase 1 OS=Saccharomyces cerevisiae (strain ATCC 204508 / S288c) GN=ACS1 PE=1 SV=2	Q01574|ACS1_YEAST	uniprot_sprot.fasta	79,142.5	100.0%	5	5	6	0.0104%	7.57%
Nuclear protein STH1/NPS1 OS=Saccharomyces cerevisiae (strain ATCC 204508 / S288c) GN=STH1 PE=1 SV=1	P32597|STH1_YEAST	uniprot_sprot.fasta	156,750.6	100.0%	5	5	6	0.0104%	3.31%
Ubiquitin-40S ribosomal protein S31 OS=Saccharomyces cerevisiae (strain ATCC 204508 / S288c) GN=RPS31 PE=1 SV=3	P05759|RS27A_YEAST	uniprot_sprot.fasta	17,216.6	100.0%	4	5	6	0.0104%	30.3%
Eukaryotic translation initiation factor 5A-1 OS=Saccharomyces cerevisiae (strain ATCC 204508 / S288c) GN=HYP2 PE=1 SV=3	P23301|IF5A1_YEAST	uniprot_sprot.fasta	17,114.6	100.0%	3	5	6	0.0104%	19.1%
60S ribosomal protein L2-A OS=Saccharomyces cerevisiae (strain ATCC 204508 / S288c) GN=RPL2A PE=1 SV=1	P0CX45|RL2A_YEAST,P0CX46|RL2B_YEAST	uniprot_sprot.fasta	27,408.9	100.0%	4	5	6	0.0104%	14.6%
Protein N-terminal amidase OS=Saccharomyces cerevisiae (strain ATCC 204508 / S288c) GN=NTA1 PE=1 SV=1	P40354|NTA1_YEAST	uniprot_sprot.fasta	51,899.7	100.0%	5	5	6	0.0104%	10.9%
60S ribosomal protein L1-A OS=Saccharomyces cerevisiae (strain ATCC 204508 / S288c) GN=RPL1A PE=1 SV=1	P0CX43|RL1A_YEAST,P0CX44|RL1B_YEAST	uniprot_sprot.fasta	24,486.3	100.0%	4	4	6	0.0104%	18.9%
60S ribosomal protein L28 OS=Saccharomyces cerevisiae (strain ATCC 204508 / S288c) GN=RPL28 PE=1 SV=3	P02406|RL28_YEAST	uniprot_sprot.fasta	16,721.9	100.0%	4	4	6	0.0104%	20.1%
Proteasome component Y7 OS=Saccharomyces cerevisiae (strain ATCC 204508 / S288c) GN=PRE8 PE=1 SV=1	P23639|PSA2_YEAST	uniprot_sprot.fasta	27,163.1	100.0%	4	4	6	0.0104%	22.0%
Probable 2-methylcitrate dehydratase OS=Saccharomyces cerevisiae (strain ATCC 204508 / S288c) GN=PDH1 PE=1 SV=1	Q12428|PRPD_YEAST	uniprot_sprot.fasta	57,685.7	100.0%	4	4	6	0.0104%	10.7%
40S ribosomal protein S17-A OS=Saccharomyces cerevisiae (strain ATCC 204508 / S288c) GN=RPS17A PE=1 SV=1	P02407|RS17A_YEAST,P14127|RS17B_YEAST	uniprot_sprot.fasta	15,788.9	100.0%	4	4	6	0.0104%	38.2%
Clathrin heavy chain OS=Saccharomyces cerevisiae (strain ATCC 204508 / S288c) GN=CHC1 PE=1 SV=1	P22137|CLH_YEAST	uniprot_sprot.fasta	187,243.2	100.0%	4	4	6	0.0104%	3.21%
Actin-like protein ARP9 OS=Saccharomyces cerevisiae (strain ATCC 204508 / S288c) GN=ARP9 PE=1 SV=1	Q05123|ARP9_YEAST	uniprot_sprot.fasta	53,076.7	100.0%	4	4	6	0.0104%	8.99%
Lysine--tRNA ligase, cytoplasmic OS=Saccharomyces cerevisiae (strain ATCC 204508 / S288c) GN=KRS1 PE=1 SV=2	P15180|SYKC_YEAST	uniprot_sprot.fasta	67,960.5	100.0%	3	3	6	0.0104%	6.26%
Superoxide dismutase [Cu-Zn] OS=Saccharomyces cerevisiae (strain ATCC 204508 / S288c) GN=SOD1 PE=1 SV=2	P00445|SODC_YEAST	uniprot_sprot.fasta	15,854.0	100.0%	3	3	6	0.0104%	36.4%
Elongation factor Tu, mitochondrial OS=Saccharomyces cerevisiae (strain ATCC 204508 / S288c) GN=TUF1 PE=1 SV=1	P02992|EFTU_YEAST	uniprot_sprot.fasta	47,972.9	100.0%	3	3	6	0.0104%	11.0%
Tryptophan synthase OS=Saccharomyces cerevisiae (strain ATCC 204508 / S288c) GN=TRP5 PE=1 SV=1	P00931|TRP_YEAST	uniprot_sprot.fasta	76,626.6	100.0%	3	3	6	0.0104%	5.52%
Translationally-controlled tumor protein homolog OS=Saccharomyces cerevisiae (strain ATCC 204508 / S288c) GN=TMA19 PE=1 SV=1	P35691|TCTP_YEAST	uniprot_sprot.fasta	18,741.3	100.0%	3	3	6	0.0104%	22.2%
Phenylalanine--tRNA ligase beta subunit OS=Saccharomyces cerevisiae (strain ATCC 204508 / S288c) GN=FRS1 PE=1 SV=3	P15624|SYFB_YEAST	uniprot_sprot.fasta	67,367.2	99.8%	2	2	6	0.0104%	4.03%
FK506-binding protein 1 OS=Saccharomyces cerevisiae (strain ATCC 204508 / S288c) GN=FPR1 PE=1 SV=2	P20081|FKBP_YEAST	uniprot_sprot.fasta	12,158.1	100.0%	5	6	6	0.0107%	40.4%
40S ribosomal protein S13 OS=Saccharomyces cerevisiae (strain ATCC 204508 / S288c) GN=RPS13 PE=1 SV=3	P05756|RS13_YEAST	uniprot_sprot.fasta	17,029.8	100.0%	6	6	6	0.0107%	34.4%
Acetyl-CoA acetyltransferase OS=Saccharomyces cerevisiae (strain ATCC 204508 / S288c) GN=ERG10 PE=1 SV=3	P41338|THIL_YEAST	uniprot_sprot.fasta	41,728.6	100.0%	6	6	6	0.0107%	22.6%
78 kDa glucose-regulated protein homolog OS=Saccharomyces cerevisiae (strain ATCC 204508 / S288c) GN=KAR2 PE=1 SV=1	P16474|GRP78_YEAST	uniprot_sprot.fasta	74,470.2	100.0%	5	6	6	0.0107%	13.8%
DNA-directed RNA polymerase I subunit RPA190 OS=Saccharomyces cerevisiae (strain ATCC 204508 / S288c) GN=RPA190 PE=1 SV=2	P10964|RPA1_YEAST	uniprot_sprot.fasta	186,435.3	100.0%	6	6	6	0.0107%	5.71%
40S ribosomal protein S9-A OS=Saccharomyces cerevisiae (strain ATCC 204508 / S288c) GN=RPS9A PE=1 SV=3	O13516|RS9A_YEAST,P05755|RS9B_YEAST	uniprot_sprot.fasta	22,443.9	100.0%	5	6	6	0.0107%	19.8%
Uncharacterized protein YNR034W-A OS=Saccharomyces cerevisiae (strain ATCC 204508 / S288c) GN=YNR034W-A PE=1 SV=1	Q3E841|YN034_YEAST	uniprot_sprot.fasta	10,781.7	100.0%	6	6	6	0.0107%	60.2%
Peroxisomal-coenzyme A synthetase OS=Saccharomyces cerevisiae (strain ATCC 204508 / S288c) GN=PCS60 PE=1 SV=1	P38137|FAT2_YEAST	uniprot_sprot.fasta	60,489.9	100.0%	6	6	6	0.0107%	15.8%
40S ribosomal protein S2 OS=Saccharomyces cerevisiae (strain ATCC 204508 / S288c) GN=RPS2 PE=1 SV=3	P25443|RS2_YEAST	uniprot_sprot.fasta	27,450.2	100.0%	4	5	6	0.0107%	16.1%
Aromatic amino acid aminotransferase 2 OS=Saccharomyces cerevisiae (strain ATCC 204508 / S288c) GN=ARO9 PE=1 SV=3	P38840|ARO9_YEAST	uniprot_sprot.fasta	58,530.7	100.0%	5	5	6	0.0107%	11.3%
Translational activator GCN1 OS=Saccharomyces cerevisiae (strain ATCC 204508 / S288c) GN=GCN1 PE=1 SV=1	P33892|GCN1_YEAST	uniprot_sprot.fasta	296,710.2	100.0%	5	5	6	0.0107%	2.28%
Zuotin OS=Saccharomyces cerevisiae (strain ATCC 204508 / S288c) GN=ZUO1 PE=1 SV=1	P32527|ZUO1_YEAST	uniprot_sprot.fasta	49,021.5	100.0%	4	4	6	0.0107%	13.6%
Histidine--tRNA ligase, mitochondrial OS=Saccharomyces cerevisiae (strain ATCC 204508 / S288c) GN=HTS1 PE=1 SV=2	P07263|SYH_YEAST	uniprot_sprot.fasta	59,955.0	100.0%	4	4	6	0.0107%	8.24%
Homoserine kinase OS=Saccharomyces cerevisiae (strain ATCC 204508 / S288c) GN=THR1 PE=1 SV=4	P17423|KHSE_YEAST	uniprot_sprot.fasta	38,713.5	100.0%	4	4	6	0.0107%	10.9%
40S ribosomal protein S24-A OS=Saccharomyces cerevisiae (strain ATCC 204508 / S288c) GN=RPS24A PE=1 SV=1	P0CX31|RS24A_YEAST,P0CX32|RS24B_YEAST	uniprot_sprot.fasta	15,329.0	100.0%	4	4	6	0.0107%	33.3%
C-1-tetrahydrofolate synthase, cytoplasmic OS=Saccharomyces cerevisiae (strain ATCC 204508 / S288c) GN=ADE3 PE=1 SV=1	P07245|C1TC_YEAST	uniprot_sprot.fasta	102,207.3	100.0%	4	4	6	0.0107%	6.13%
Hit family protein 1 OS=Saccharomyces cerevisiae (strain ATCC 204508 / S288c) GN=HNT1 PE=1 SV=2	Q04344|HNT1_YEAST	uniprot_sprot.fasta	17,680.8	100.0%	4	4	6	0.0107%	31.0%
Eukaryotic translation initiation factor 2 subunit gamma OS=Saccharomyces cerevisiae (strain ATCC 204508 / S288c) GN=GCD11 PE=1 SV=1	P32481|IF2G_YEAST	uniprot_sprot.fasta	57,867.2	100.0%	4	4	6	0.0107%	11.2%
40S ribosomal protein S8-A OS=Saccharomyces cerevisiae (strain ATCC 204508 / S288c) GN=RPS8A PE=1 SV=1	P0CX39|RS8A_YEAST,P0CX40|RS8B_YEAST	uniprot_sprot.fasta	22,490.4	100.0%	4	4	6	0.0107%	27.5%
40S ribosomal protein S19-A OS=Saccharomyces cerevisiae (strain ATCC 204508 / S288c) GN=RPS19A PE=1 SV=2	P07280|RS19A_YEAST,P07281|RS19B_YEAST	uniprot_sprot.fasta	15,917.4	100.0%	4	4	6	0.0107%	29.2%
40S ribosomal protein S20 OS=Saccharomyces cerevisiae (strain ATCC 204508 / S288c) GN=RPS20 PE=1 SV=3	P38701|RS20_YEAST	uniprot_sprot.fasta	13,906.8	100.0%	3	4	6	0.0107%	21.5%
Protein N-terminal amidase OS=Saccharomyces cerevisiae (strain ATCC 204508 / S288c) GN=NTA1 PE=1 SV=1	P40354|NTA1_YEAST	uniprot_sprot.fasta	51,899.7	100.0%	4	4	6	0.0107%	8.75%
Alcohol dehydrogenase 2 OS=Saccharomyces cerevisiae (strain ATCC 204508 / S288c) GN=ADH2 PE=1 SV=3	P00331|ADH2_YEAST	uniprot_sprot.fasta	36,731.8	100.0%	3	3	6	0.0107%	21.3%
Serine hydroxymethyltransferase, mitochondrial OS=Saccharomyces cerevisiae (strain ATCC 204508 / S288c) GN=SHM1 PE=1 SV=2	P37292|GLYM_YEAST	uniprot_sprot.fasta	53,688.0	100.0%	3	3	6	0.0107%	8.37%
Transcription elongation factor SPT6 OS=Saccharomyces cerevisiae (strain ATCC 204508 / S288c) GN=SPT6 PE=1 SV=1	P23615|SPT6_YEAST	uniprot_sprot.fasta	168,298.5	100.0%	3	3	6	0.0107%	2.00%
Dolichol-phosphate mannosyltransferase OS=Saccharomyces cerevisiae (strain ATCC 204508 / S288c) GN=DPM1 PE=1 SV=3	P14020|DPM1_YEAST	uniprot_sprot.fasta	30,363.4	99.8%	2	2	6	0.0107%	10.5%
Zuotin OS=Saccharomyces cerevisiae (strain ATCC 204508 / S288c) GN=ZUO1 PE=1 SV=1	P32527|ZUO1_YEAST	uniprot_sprot.fasta	49,021.5	100.0%	6	6	6	0.0118%	15.7%
External NADH-ubiquinone oxidoreductase 1, mitochondrial OS=Saccharomyces cerevisiae (strain ATCC 204508 / S288c) GN=NDE1 PE=1 SV=1	P40215|NDH1_YEAST	uniprot_sprot.fasta	62,776.5	100.0%	6	6	6	0.0118%	12.7%
La protein homolog OS=Saccharomyces cerevisiae (strain ATCC 204508 / S288c) GN=LHP1 PE=1 SV=2	P33399|LHP1_YEAST	uniprot_sprot.fasta	32,104.9	100.0%	6	6	6	0.0118%	21.1%
Uncharacterized protein YNR034W-A OS=Saccharomyces cerevisiae (strain ATCC 204508 / S288c) GN=YNR034W-A PE=1 SV=1	Q3E841|YN034_YEAST	uniprot_sprot.fasta	10,781.7	100.0%	6	6	6	0.0118%	48.0%
60S ribosomal protein L1-A OS=Saccharomyces cerevisiae (strain ATCC 204508 / S288c) GN=RPL1A PE=1 SV=1	P0CX43|RL1A_YEAST,P0CX44|RL1B_YEAST	uniprot_sprot.fasta	24,486.3	100.0%	4	5	6	0.0118%	18.9%
60S ribosomal protein L2-A OS=Saccharomyces cerevisiae (strain ATCC 204508 / S288c) GN=RPL2A PE=1 SV=1	P0CX45|RL2A_YEAST,P0CX46|RL2B_YEAST	uniprot_sprot.fasta	27,408.9	100.0%	4	5	6	0.0118%	14.6%
Transcription elongation factor SPT5 OS=Saccharomyces cerevisiae (strain ATCC 204508 / S288c) GN=SPT5 PE=1 SV=1	P27692|SPT5_YEAST	uniprot_sprot.fasta	115,651.4	100.0%	5	5	6	0.0118%	6.40%
Clathrin heavy chain OS=Saccharomyces cerevisiae (strain ATCC 204508 / S288c) GN=CHC1 PE=1 SV=1	P22137|CLH_YEAST	uniprot_sprot.fasta	187,243.2	100.0%	5	5	6	0.0118%	4.11%
Translational activator GCN1 OS=Saccharomyces cerevisiae (strain ATCC 204508 / S288c) GN=GCN1 PE=1 SV=1	P33892|GCN1_YEAST	uniprot_sprot.fasta	296,710.2	100.0%	5	5	6	0.0118%	2.40%
Isocitrate dehydrogenase [NADP] cytoplasmic OS=Saccharomyces cerevisiae (strain ATCC 204508 / S288c) GN=IDP2 PE=1 SV=2	P41939|IDHC_YEAST	uniprot_sprot.fasta	46,563.8	100.0%	4	4	6	0.0118%	15.8%
Eukaryotic translation initiation factor 3 subunit B OS=Saccharomyces cerevisiae (strain YJM789) GN=PRT1 PE=3 SV=1	A6ZPJ1|EIF3B_YEAS7,P06103|EIF3B_YEAST	uniprot_sprot.fasta	88,330.8	100.0%	4	4	6	0.0118%	6.54%
L-asparaginase 1 OS=Saccharomyces cerevisiae (strain ATCC 204508 / S288c) GN=ASP1 PE=1 SV=1	P38986|ASPG1_YEAST	uniprot_sprot.fasta	41,396.1	100.0%	4	4	6	0.0118%	12.3%
Methionine--tRNA ligase, cytoplasmic OS=Saccharomyces cerevisiae (strain ATCC 204508 / S288c) GN=MES1 PE=1 SV=4	P00958|SYMC_YEAST	uniprot_sprot.fasta	85,680.9	100.0%	4	4	6	0.0118%	7.46%
60S ribosomal protein L15-A OS=Saccharomyces cerevisiae (strain ATCC 204508 / S288c) GN=RPL15A PE=1 SV=3	P05748|RL15A_YEAST	uniprot_sprot.fasta	24,422.6	100.0%	4	4	6	0.0118%	22.1%
DNA-binding protein RAP1 OS=Saccharomyces cerevisiae (strain ATCC 204508 / S288c) GN=RAP1 PE=1 SV=2	P11938|RAP1_YEAST	uniprot_sprot.fasta	92,415.5	100.0%	3	3	6	0.0118%	4.96%
26S protease regulatory subunit 4 homolog OS=Saccharomyces cerevisiae (strain ATCC 204508 / S288c) GN=RPT2 PE=1 SV=3	P40327|PRS4_YEAST	uniprot_sprot.fasta	48,830.5	100.0%	3	3	6	0.0118%	8.01%
Phenylalanine--tRNA ligase beta subunit OS=Saccharomyces cerevisiae (strain ATCC 204508 / S288c) GN=FRS1 PE=1 SV=3	P15624|SYFB_YEAST	uniprot_sprot.fasta	67,367.2	100.0%	3	3	6	0.0118%	6.22%
GU4 nucleic-binding protein 1 OS=Saccharomyces cerevisiae (strain ATCC 204508 / S288c) GN=ARC1 PE=1 SV=2	P46672|G4P1_YEAST	uniprot_sprot.fasta	42,084.5	100.0%	3	3	6	0.0118%	8.24%
Succinate dehydrogenase [ubiquinone] iron-sulfur subunit, mitochondrial OS=Saccharomyces cerevisiae (strain ATCC 204508 / S288c) GN=SDH2 PE=1 SV=1	P21801|DHSB_YEAST	uniprot_sprot.fasta	30,232.3	100.0%	2	2	6	0.0118%	9.02%
60S ribosomal protein L17-A OS=Saccharomyces cerevisiae (strain ATCC 204508 / S288c) GN=RPL17A PE=1 SV=4	P05740|RL17A_YEAST	uniprot_sprot.fasta	20,549.6	100.0%	5	7	7	0.0121%	29.9%
26S proteasome regulatory subunit RPN2 OS=Saccharomyces cerevisiae (strain ATCC 204508 / S288c) GN=RPN2 PE=1 SV=4	P32565|RPN2_YEAST	uniprot_sprot.fasta	104,237.0	100.0%	7	7	7	0.0121%	7.51%
Succinyl-CoA ligase [ADP-forming] subunit beta, mitochondrial OS=Saccharomyces cerevisiae (strain ATCC 204508 / S288c) GN=LSC2 PE=1 SV=1	P53312|SUCB_YEAST	uniprot_sprot.fasta	46,902.1	100.0%	7	7	7	0.0121%	21.3%
Adenylosuccinate lyase OS=Saccharomyces cerevisiae (strain ATCC 204508 / S288c) GN=ADE13 PE=1 SV=1	Q05911|PUR8_YEAST	uniprot_sprot.fasta	54,511.8	100.0%	6	7	7	0.0121%	14.5%
Succinyl-CoA ligase [ADP-forming] subunit alpha, mitochondrial OS=Saccharomyces cerevisiae (strain ATCC 204508 / S288c) GN=LSC1 PE=1 SV=1	P53598|SUCA_YEAST	uniprot_sprot.fasta	35,033.5	100.0%	6	6	7	0.0121%	27.4%
NAD-specific glutamate dehydrogenase OS=Saccharomyces cerevisiae (strain ATCC 204508 / S288c) GN=GDH2 PE=1 SV=1	P33327|DHE2_YEAST	uniprot_sprot.fasta	124,339.2	100.0%	6	6	7	0.0121%	7.33%
Glutamate synthase [NADH] OS=Saccharomyces cerevisiae (strain ATCC 204508 / S288c) GN=GLT1 PE=1 SV=2	Q12680|GLT1_YEAST	uniprot_sprot.fasta	238,108.3	100.0%	6	6	7	0.0121%	3.03%
Peroxisomal-coenzyme A synthetase OS=Saccharomyces cerevisiae (strain ATCC 204508 / S288c) GN=PCS60 PE=1 SV=1	P38137|FAT2_YEAST	uniprot_sprot.fasta	60,489.9	100.0%	6	6	7	0.0121%	15.8%
1,3-beta-glucan synthase component FKS1 OS=Saccharomyces cerevisiae (strain ATCC 204508 / S288c) GN=FKS1 PE=1 SV=2	P38631|FKS1_YEAST	uniprot_sprot.fasta	214,859.4	100.0%	6	6	7	0.0121%	3.68%
Inorganic phosphate transport protein PHO88 OS=Saccharomyces cerevisiae (strain ATCC 204508 / S288c) GN=PHO88 PE=1 SV=1	P38264|PHO88_YEAST	uniprot_sprot.fasta	21,138.0	100.0%	4	5	7	0.0121%	28.2%
40S ribosomal protein S2 OS=Saccharomyces cerevisiae (strain ATCC 204508 / S288c) GN=RPS2 PE=1 SV=3	P25443|RS2_YEAST	uniprot_sprot.fasta	27,450.2	100.0%	4	5	7	0.0121%	16.1%
40S ribosomal protein S24-A OS=Saccharomyces cerevisiae (strain ATCC 204508 / S288c) GN=RPS24A PE=1 SV=1	P0CX31|RS24A_YEAST,P0CX32|RS24B_YEAST	uniprot_sprot.fasta	15,329.0	100.0%	5	5	7	0.0121%	34.1%
Alpha,alpha-trehalose-phosphate synthase [UDP-forming] 56 kDa subunit OS=Saccharomyces cerevisiae (strain ATCC 204508 / S288c) GN=TPS1 PE=1 SV=2	Q00764|TPS1_YEAST	uniprot_sprot.fasta	56,148.3	100.0%	4	5	7	0.0121%	9.29%
Mannose-6-phosphate isomerase OS=Saccharomyces cerevisiae (strain ATCC 204508 / S288c) GN=PMI40 PE=1 SV=4	P29952|MPI_YEAST	uniprot_sprot.fasta	48,190.6	100.0%	4	4	7	0.0121%	11.4%
DNA-directed RNA polymerase I subunit RPA34 OS=Saccharomyces cerevisiae (strain ATCC 204508 / S288c) GN=RPA34 PE=1 SV=1	P47006|RPA34_YEAST	uniprot_sprot.fasta	26,876.5	100.0%	4	4	7	0.0121%	18.5%
Branched-chain-amino-acid aminotransferase, mitochondrial OS=Saccharomyces cerevisiae (strain ATCC 204508 / S288c) GN=BAT1 PE=1 SV=1	P38891|BCA1_YEAST	uniprot_sprot.fasta	43,597.5	100.0%	3	4	7	0.0121%	9.41%
RNA polymerase-associated protein CTR9 OS=Saccharomyces cerevisiae (strain ATCC 204508 / S288c) GN=CTR9 PE=1 SV=3	P89105|CTR9_YEAST	uniprot_sprot.fasta	124,717.2	100.0%	4	4	7	0.0121%	3.53%
Translation initiation factor RLI1 OS=Saccharomyces cerevisiae (strain ATCC 204508 / S288c) GN=RLI1 PE=1 SV=1	Q03195|RLI1_YEAST	uniprot_sprot.fasta	68,343.3	100.0%	3	3	7	0.0121%	5.26%
Arginase OS=Saccharomyces cerevisiae (strain ATCC 204508 / S288c) GN=CAR1 PE=1 SV=1	P00812|ARGI_YEAST	uniprot_sprot.fasta	35,662.7	100.0%	3	3	7	0.0121%	9.01%
Eukaryotic translation initiation factor 2 subunit gamma OS=Saccharomyces cerevisiae (strain ATCC 204508 / S288c) GN=GCD11 PE=1 SV=1	P32481|IF2G_YEAST	uniprot_sprot.fasta	57,867.2	100.0%	3	3	7	0.0121%	7.40%
Cell division control protein 12 OS=Saccharomyces cerevisiae (strain ATCC 204508 / S288c) GN=CDC12 PE=1 SV=1	P32468|CDC12_YEAST	uniprot_sprot.fasta	46,668.9	100.0%	3	3	7	0.0121%	8.11%
GU4 nucleic-binding protein 1 OS=Saccharomyces cerevisiae (strain ATCC 204508 / S288c) GN=ARC1 PE=1 SV=2	P46672|G4P1_YEAST	uniprot_sprot.fasta	42,084.5	100.0%	3	3	7	0.0121%	8.24%
60S ribosomal protein L9-A OS=Saccharomyces cerevisiae (strain ATCC 204508 / S288c) GN=RPL9A PE=1 SV=2	P05738|RL9A_YEAST	uniprot_sprot.fasta	21,568.8	99.9%	2	2	7	0.0121%	11.5%
Dihydroxyacetone kinase 1 OS=Saccharomyces cerevisiae (strain ATCC 204508 / S288c) GN=DAK1 PE=1 SV=1	P54838|DAK1_YEAST	uniprot_sprot.fasta	62,208.4	100.0%	7	7	7	0.0125%	15.8%
Sphingolipid long chain base-responsive protein PIL1 OS=Saccharomyces cerevisiae (strain ATCC 204508 / S288c) GN=PIL1 PE=1 SV=1	P53252|PIL1_YEAST	uniprot_sprot.fasta	38,350.3	100.0%	6	7	7	0.0125%	26.3%
RuvB-like protein 1 OS=Saccharomyces cerevisiae (strain ATCC 204508 / S288c) GN=RVB1 PE=1 SV=1	Q03940|RUVB1_YEAST	uniprot_sprot.fasta	50,454.0	100.0%	6	6	7	0.0125%	17.5%
T-complex protein 1 subunit beta OS=Saccharomyces cerevisiae (strain ATCC 204508 / S288c) GN=CCT2 PE=1 SV=1	P39076|TCPB_YEAST	uniprot_sprot.fasta	57,205.7	100.0%	5	5	7	0.0125%	12.3%
40S ribosomal protein S6-A OS=Saccharomyces cerevisiae (strain ATCC 204508 / S288c) GN=RPS6A PE=1 SV=1	P0CX37|RS6A_YEAST,P0CX38|RS6B_YEAST	uniprot_sprot.fasta	26,997.2	100.0%	5	5	7	0.0125%	25.4%
Nucleoside diphosphate kinase OS=Saccharomyces cerevisiae (strain ATCC 204508 / S288c) GN=YNK1 PE=1 SV=1	P36010|NDK_YEAST	uniprot_sprot.fasta	17,166.9	100.0%	5	5	7	0.0125%	41.2%
Calcium-transporting ATPase 2 OS=Saccharomyces cerevisiae (strain ATCC 204508 / S288c) GN=PMC1 PE=1 SV=1	P38929|ATC2_YEAST	uniprot_sprot.fasta	130,866.4	100.0%	5	5	7	0.0125%	5.46%
Translation initiation factor RLI1 OS=Saccharomyces cerevisiae (strain ATCC 204508 / S288c) GN=RLI1 PE=1 SV=1	Q03195|RLI1_YEAST	uniprot_sprot.fasta	68,343.3	100.0%	4	4	7	0.0125%	7.89%
Nascent polypeptide-associated complex subunit alpha OS=Saccharomyces cerevisiae (strain YJM789) GN=EGD2 PE=3 SV=1	A6ZT99|NACA_YEAS7,P38879|NACA_YEAST	uniprot_sprot.fasta	18,709.1	100.0%	4	4	7	0.0125%	37.4%
Eukaryotic translation initiation factor 3 subunit B OS=Saccharomyces cerevisiae (strain YJM789) GN=PRT1 PE=3 SV=1	A6ZPJ1|EIF3B_YEAS7,P06103|EIF3B_YEAST	uniprot_sprot.fasta	88,330.8	100.0%	4	4	7	0.0125%	6.14%
Elongation factor Tu, mitochondrial OS=Saccharomyces cerevisiae (strain ATCC 204508 / S288c) GN=TUF1 PE=1 SV=1	P02992|EFTU_YEAST	uniprot_sprot.fasta	47,972.9	100.0%	4	4	7	0.0125%	14.4%
60S ribosomal protein L4-A OS=Saccharomyces cerevisiae (strain ATCC 204508 / S288c) GN=RPL4A PE=1 SV=4	P10664|RL4A_YEAST	uniprot_sprot.fasta	39,092.0	100.0%	4	4	7	0.0125%	18.8%
Cofilin OS=Saccharomyces cerevisiae (strain ATCC 204508 / S288c) GN=COF1 PE=1 SV=1	Q03048|COFI_YEAST	uniprot_sprot.fasta	15,901.2	100.0%	4	4	7	0.0125%	38.5%
40S ribosomal protein S28-B OS=Saccharomyces cerevisiae (strain ATCC 204508 / S288c) GN=RPS28B PE=1 SV=1	P0C0X0|RS28B_YEAST,Q3E7X9|RS28A_YEAST	uniprot_sprot.fasta	7,591.7	100.0%	4	4	7	0.0125%	47.8%
40S ribosomal protein S12 OS=Saccharomyces cerevisiae (strain ATCC 204508 / S288c) GN=RPS12 PE=1 SV=1	P48589|RS12_YEAST	uniprot_sprot.fasta	15,470.9	100.0%	4	4	7	0.0125%	28.0%
Fimbrin OS=Saccharomyces cerevisiae (strain ATCC 204508 / S288c) GN=SAC6 PE=1 SV=1	P32599|FIMB_YEAST	uniprot_sprot.fasta	71,775.5	100.0%	3	3	7	0.0125%	6.07%
Glycerol-3-phosphate dehydrogenase, mitochondrial OS=Saccharomyces cerevisiae (strain ATCC 204508 / S288c) GN=GUT2 PE=1 SV=2	P32191|GPDM_YEAST	uniprot_sprot.fasta	72,390.6	100.0%	7	7	7	0.0137%	10.8%
Peroxisomal-coenzyme A synthetase OS=Saccharomyces cerevisiae (strain ATCC 204508 / S288c) GN=PCS60 PE=1 SV=1	P38137|FAT2_YEAST	uniprot_sprot.fasta	60,489.9	100.0%	7	7	7	0.0137%	18.8%
Protein N-terminal amidase OS=Saccharomyces cerevisiae (strain ATCC 204508 / S288c) GN=NTA1 PE=1 SV=1	P40354|NTA1_YEAST	uniprot_sprot.fasta	51,899.7	100.0%	7	7	7	0.0137%	16.0%
40S ribosomal protein S2 OS=Saccharomyces cerevisiae (strain ATCC 204508 / S288c) GN=RPS2 PE=1 SV=3	P25443|RS2_YEAST	uniprot_sprot.fasta	27,450.2	100.0%	5	6	7	0.0137%	22.8%
General transcriptional corepressor TUP1 OS=Saccharomyces cerevisiae (strain ATCC 204508 / S288c) GN=TUP1 PE=1 SV=2	P16649|TUP1_YEAST	uniprot_sprot.fasta	78,307.2	100.0%	4	6	7	0.0137%	7.71%
6-phosphofructo-2-kinase 1 OS=Saccharomyces cerevisiae (strain ATCC 204508 / S288c) GN=PFK26 PE=1 SV=1	P40433|6P21_YEAST	uniprot_sprot.fasta	93,421.4	100.0%	6	6	7	0.0137%	9.43%
Inorganic phosphate transport protein PHO88 OS=Saccharomyces cerevisiae (strain ATCC 204508 / S288c) GN=PHO88 PE=1 SV=1	P38264|PHO88_YEAST	uniprot_sprot.fasta	21,138.0	100.0%	5	5	7	0.0137%	34.6%
Phosphoribosylaminoimidazole-succinocarboxamide synthase OS=Saccharomyces cerevisiae (strain ATCC 204508 / S288c) GN=ADE1 PE=1 SV=2	P27616|PUR7_YEAST	uniprot_sprot.fasta	34,604.8	100.0%	5	5	7	0.0137%	24.2%
Serine hydroxymethyltransferase, mitochondrial OS=Saccharomyces cerevisiae (strain ATCC 204508 / S288c) GN=SHM1 PE=1 SV=2	P37292|GLYM_YEAST	uniprot_sprot.fasta	53,688.0	100.0%	5	5	7	0.0137%	13.3%
Spermidine synthase OS=Saccharomyces cerevisiae (strain ATCC 204508 / S288c) GN=SPE3 PE=1 SV=1	Q12074|SPEE_YEAST	uniprot_sprot.fasta	33,324.4	100.0%	4	5	7	0.0137%	17.7%
Cofilin OS=Saccharomyces cerevisiae (strain ATCC 204508 / S288c) GN=COF1 PE=1 SV=1	Q03048|COFI_YEAST	uniprot_sprot.fasta	15,901.2	100.0%	4	5	7	0.0137%	32.9%
Transcription elongation factor SPT6 OS=Saccharomyces cerevisiae (strain ATCC 204508 / S288c) GN=SPT6 PE=1 SV=1	P23615|SPT6_YEAST	uniprot_sprot.fasta	168,298.5	100.0%	5	5	7	0.0137%	4.00%
Isocitrate dehydrogenase [NADP], mitochondrial OS=Saccharomyces cerevisiae (strain ATCC 204508 / S288c) GN=IDP1 PE=1 SV=1	P21954|IDHP_YEAST	uniprot_sprot.fasta	48,192.8	100.0%	5	5	7	0.0137%	10.0%
Cystathionine gamma-lyase OS=Saccharomyces cerevisiae (strain ATCC 204508 / S288c) GN=CYS3 PE=1 SV=2	P31373|CYS3_YEAST	uniprot_sprot.fasta	42,542.8	100.0%	4	4	7	0.0137%	12.7%
Small glutamine-rich tetratricopeptide repeat-containing protein 2 OS=Saccharomyces cerevisiae (strain ATCC 204508 / S288c) GN=SGT2 PE=1 SV=1	Q12118|SGT2_YEAST	uniprot_sprot.fasta	37,219.9	100.0%	4	4	7	0.0137%	16.2%
Serine/threonine-protein kinase KSP1 OS=Saccharomyces cerevisiae (strain ATCC 204508 / S288c) GN=KSP1 PE=1 SV=1	P38691|KSP1_YEAST	uniprot_sprot.fasta	117,085.4	100.0%	4	4	7	0.0137%	4.76%
Ribonucleoside-diphosphate reductase small chain 1 OS=Saccharomyces cerevisiae (strain ATCC 204508 / S288c) GN=RNR2 PE=1 SV=2	P09938|RIR2_YEAST	uniprot_sprot.fasta	46,149.4	100.0%	3	4	7	0.0137%	9.52%
40S ribosomal protein S8-A OS=Saccharomyces cerevisiae (strain ATCC 204508 / S288c) GN=RPS8A PE=1 SV=1	P0CX39|RS8A_YEAST,P0CX40|RS8B_YEAST	uniprot_sprot.fasta	22,490.4	100.0%	4	4	7	0.0137%	27.5%
Dihydroorotase OS=Saccharomyces cerevisiae (strain ATCC 204508 / S288c) GN=URA4 PE=1 SV=2	P20051|PYRC_YEAST	uniprot_sprot.fasta	40,314.0	100.0%	4	4	7	0.0137%	17.3%
Heat shock protein SSA4 OS=Saccharomyces cerevisiae (strain ATCC 204508 / S288c) GN=SSA4 PE=1 SV=3	P22202|HSP74_YEAST	uniprot_sprot.fasta	69,652.7	100.0%	4	4	7	0.0137%	13.9%
Calcium-transporting ATPase 2 OS=Saccharomyces cerevisiae (strain ATCC 204508 / S288c) GN=PMC1 PE=1 SV=1	P38929|ATC2_YEAST	uniprot_sprot.fasta	130,866.4	100.0%	4	4	7	0.0137%	4.18%
T-complex protein 1 subunit theta OS=Saccharomyces cerevisiae (strain ATCC 204508 / S288c) GN=CCT8 PE=1 SV=1	P47079|TCPQ_YEAST	uniprot_sprot.fasta	61,663.6	100.0%	3	3	7	0.0137%	7.04%
Dihydroxyacetone kinase 1 OS=Saccharomyces cerevisiae (strain ATCC 204508 / S288c) GN=DAK1 PE=1 SV=1	P54838|DAK1_YEAST	uniprot_sprot.fasta	62,208.4	100.0%	6	6	8	0.0139%	16.6%
Valine--tRNA ligase, mitochondrial OS=Saccharomyces cerevisiae (strain ATCC 204508 / S288c) GN=VAS1 PE=1 SV=2	P07806|SYV_YEAST	uniprot_sprot.fasta	125,774.7	100.0%	6	6	8	0.0139%	5.80%
Nucleoside diphosphate kinase OS=Saccharomyces cerevisiae (strain ATCC 204508 / S288c) GN=YNK1 PE=1 SV=1	P36010|NDK_YEAST	uniprot_sprot.fasta	17,166.9	100.0%	4	6	8	0.0139%	30.7%
Peptidyl-prolyl cis-trans isomerase OS=Saccharomyces cerevisiae (strain ATCC 204508 / S288c) GN=CPR1 PE=1 SV=3	P14832|CYPH_YEAST	uniprot_sprot.fasta	17,390.7	100.0%	4	5	8	0.0139%	27.2%
Nascent polypeptide-associated complex subunit alpha OS=Saccharomyces cerevisiae (strain YJM789) GN=EGD2 PE=3 SV=1	A6ZT99|NACA_YEAS7,P38879|NACA_YEAST	uniprot_sprot.fasta	18,709.1	100.0%	5	5	8	0.0139%	39.1%
Succinate dehydrogenase [ubiquinone] iron-sulfur subunit, mitochondrial OS=Saccharomyces cerevisiae (strain ATCC 204508 / S288c) GN=SDH2 PE=1 SV=1	P21801|DHSB_YEAST	uniprot_sprot.fasta	30,232.3	100.0%	5	5	8	0.0139%	12.0%
Protein MMF1, mitochondrial OS=Saccharomyces cerevisiae (strain ATCC 204508 / S288c) GN=MMF1 PE=1 SV=1	P40185|MMF1_YEAST	uniprot_sprot.fasta	15,908.1	100.0%	4	5	8	0.0139%	31.0%
Long-chain-fatty-acid--CoA ligase 1 OS=Saccharomyces cerevisiae (strain ATCC 204508 / S288c) GN=FAA1 PE=1 SV=1	P30624|LCF1_YEAST	uniprot_sprot.fasta	77,868.1	100.0%	5	5	8	0.0139%	8.14%
40S ribosomal protein S20 OS=Saccharomyces cerevisiae (strain ATCC 204508 / S288c) GN=RPS20 PE=1 SV=3	P38701|RS20_YEAST	uniprot_sprot.fasta	13,906.8	100.0%	4	5	8	0.0139%	33.9%
Nucleolar protein 56 OS=Saccharomyces cerevisiae (strain ATCC 204508 / S288c) GN=NOP56 PE=1 SV=1	Q12460|NOP56_YEAST	uniprot_sprot.fasta	56,867.3	100.0%	4	5	8	0.0139%	10.5%
Isocitrate dehydrogenase [NADP], mitochondrial OS=Saccharomyces cerevisiae (strain ATCC 204508 / S288c) GN=IDP1 PE=1 SV=1	P21954|IDHP_YEAST	uniprot_sprot.fasta	48,192.8	100.0%	5	5	8	0.0139%	15.0%
Actin-binding protein OS=Saccharomyces cerevisiae (strain ATCC 204508 / S288c) GN=ABP1 PE=1 SV=4	P15891|ABP1_YEAST	uniprot_sprot.fasta	65,578.2	100.0%	4	4	8	0.0139%	11.1%
Cystathionine gamma-lyase OS=Saccharomyces cerevisiae (strain ATCC 204508 / S288c) GN=CYS3 PE=1 SV=2	P31373|CYS3_YEAST	uniprot_sprot.fasta	42,542.8	100.0%	4	4	8	0.0139%	12.7%
Heat shock protein 78, mitochondrial OS=Saccharomyces cerevisiae (strain ATCC 204508 / S288c) GN=HSP78 PE=1 SV=2	P33416|HSP78_YEAST	uniprot_sprot.fasta	91,340.8	100.0%	3	4	8	0.0139%	5.55%
Phosphoenolpyruvate carboxykinase [ATP] OS=Saccharomyces cerevisiae (strain ATCC 204508 / S288c) GN=PCK1 PE=1 SV=2	P10963|PCKA_YEAST	uniprot_sprot.fasta	60,984.4	100.0%	3	3	8	0.0139%	7.10%
Dihydroorotate dehydrogenase (fumarate) OS=Saccharomyces cerevisiae (strain ATCC 204508 / S288c) GN=URA1 PE=1 SV=1	P28272|PYRD_YEAST	uniprot_sprot.fasta	34,802.7	99.9%	2	2	8	0.0139%	9.24%
Adenylosuccinate lyase OS=Saccharomyces cerevisiae (strain ATCC 204508 / S288c) GN=ADE13 PE=1 SV=1	Q05911|PUR8_YEAST	uniprot_sprot.fasta	54,511.8	100.0%	7	8	8	0.0143%	17.4%
60S ribosomal protein L20-A OS=Saccharomyces cerevisiae (strain ATCC 204508 / S288c) GN=RPL20A PE=1 SV=1	P0CX23|RL20A_YEAST,P0CX24|RL20B_YEAST	uniprot_sprot.fasta	20,437.1	100.0%	7	7	8	0.0143%	40.7%
Mitochondrial peroxiredoxin PRX1 OS=Saccharomyces cerevisiae (strain ATCC 204508 / S288c) GN=PRX1 PE=1 SV=1	P34227|PRX1_YEAST	uniprot_sprot.fasta	29,496.7	100.0%	6	6	8	0.0143%	26.4%
Aspartate aminotransferase, cytoplasmic OS=Saccharomyces cerevisiae (strain ATCC 204508 / S288c) GN=AAT2 PE=1 SV=3	P23542|AATC_YEAST	uniprot_sprot.fasta	46,058.6	100.0%	6	6	8	0.0143%	18.7%
Cystathionine gamma-lyase OS=Saccharomyces cerevisiae (strain ATCC 204508 / S288c) GN=CYS3 PE=1 SV=2	P31373|CYS3_YEAST	uniprot_sprot.fasta	42,542.8	100.0%	5	5	8	0.0143%	18.0%
Homoserine dehydrogenase OS=Saccharomyces cerevisiae (strain ATCC 204508 / S288c) GN=HOM6 PE=1 SV=1	P31116|DHOM_YEAST	uniprot_sprot.fasta	38,503.2	100.0%	5	5	8	0.0143%	16.7%
ATP-dependent RNA helicase DED1 OS=Saccharomyces cerevisiae (strain YJM789) GN=DED1 PE=3 SV=1	A6ZP47|DED1_YEAS7,P06634|DED1_YEAST	uniprot_sprot.fasta	65,554.5	100.0%	5	5	8	0.0143%	11.1%
Low specificity L-threonine aldolase OS=Saccharomyces cerevisiae (strain ATCC 204508 / S288c) GN=GLY1 PE=1 SV=2	P37303|GLY1_YEAST	uniprot_sprot.fasta	42,815.8	100.0%	4	5	8	0.0143%	14.5%
Phenylalanine--tRNA ligase beta subunit OS=Saccharomyces cerevisiae (strain ATCC 204508 / S288c) GN=FRS1 PE=1 SV=3	P15624|SYFB_YEAST	uniprot_sprot.fasta	67,367.2	100.0%	5	5	8	0.0143%	9.08%
Dihydroorotase OS=Saccharomyces cerevisiae (strain ATCC 204508 / S288c) GN=URA4 PE=1 SV=2	P20051|PYRC_YEAST	uniprot_sprot.fasta	40,314.0	100.0%	4	5	8	0.0143%	17.3%
Clathrin heavy chain OS=Saccharomyces cerevisiae (strain ATCC 204508 / S288c) GN=CHC1 PE=1 SV=1	P22137|CLH_YEAST	uniprot_sprot.fasta	187,243.2	100.0%	5	5	8	0.0143%	3.81%
60S ribosomal protein L23-A OS=Saccharomyces cerevisiae (strain ATCC 204508 / S288c) GN=RPL23A PE=1 SV=1	P0CX41|RL23A_YEAST,P0CX42|RL23B_YEAST	uniprot_sprot.fasta	14,473.1	100.0%	4	4	8	0.0143%	19.7%
2-isopropylmalate synthase OS=Saccharomyces cerevisiae (strain ATCC 204508 / S288c) GN=LEU4 PE=1 SV=1	P06208|LEU1_YEAST	uniprot_sprot.fasta	68,409.3	100.0%	4	4	8	0.0143%	7.59%
ATP-dependent RNA helicase SUB2 OS=Saccharomyces cerevisiae (strain YJM789) GN=SUB2 PE=3 SV=1	A6ZXP4|SUB2_YEAS7,Q07478|SUB2_YEAST	uniprot_sprot.fasta	50,280.1	100.0%	3	3	8	0.0143%	8.07%
Arginase OS=Saccharomyces cerevisiae (strain ATCC 204508 / S288c) GN=CAR1 PE=1 SV=1	P00812|ARGI_YEAST	uniprot_sprot.fasta	35,662.7	100.0%	3	3	8	0.0143%	11.4%
Putative proline--tRNA ligase YHR020W OS=Saccharomyces cerevisiae (strain ATCC 204508 / S288c) GN=YHR020W PE=1 SV=1	P38708|YHI0_YEAST	uniprot_sprot.fasta	77,387.1	100.0%	3	3	8	0.0143%	6.10%
Heat shock protein SSA4 OS=Saccharomyces cerevisiae (strain ATCC 204508 / S288c) GN=SSA4 PE=1 SV=3	P22202|HSP74_YEAST	uniprot_sprot.fasta	69,652.7	100.0%	3	3	8	0.0143%	12.8%
C-1-tetrahydrofolate synthase, cytoplasmic OS=Saccharomyces cerevisiae (strain ATCC 204508 / S288c) GN=ADE3 PE=1 SV=1	P07245|C1TC_YEAST	uniprot_sprot.fasta	102,207.3	100.0%	7	7	9	0.0156%	10.6%
60S ribosomal protein L7-A OS=Saccharomyces cerevisiae (strain ATCC 204508 / S288c) GN=RPL7A PE=1 SV=3	P05737|RL7A_YEAST,Q12213|RL7B_YEAST	uniprot_sprot.fasta	27,639.6	100.0%	7	7	9	0.0156%	28.3%
Aromatic amino acid aminotransferase 2 OS=Saccharomyces cerevisiae (strain ATCC 204508 / S288c) GN=ARO9 PE=1 SV=3	P38840|ARO9_YEAST	uniprot_sprot.fasta	58,530.7	100.0%	7	7	9	0.0156%	16.4%
78 kDa glucose-regulated protein homolog OS=Saccharomyces cerevisiae (strain ATCC 204508 / S288c) GN=KAR2 PE=1 SV=1	P16474|GRP78_YEAST	uniprot_sprot.fasta	74,470.2	100.0%	5	6	9	0.0156%	13.8%
Adenylate kinase 1 OS=Saccharomyces cerevisiae (strain YJM789) GN=ADK1 PE=3 SV=1	A6ZYI0|KAD1_YEAS7,B3LG61|KAD1_YEAS1,P07170|KAD1_YEAST	uniprot_sprot.fasta	24,255.8	100.0%	5	6	9	0.0156%	28.4%
40S ribosomal protein S13 OS=Saccharomyces cerevisiae (strain ATCC 204508 / S288c) GN=RPS13 PE=1 SV=3	P05756|RS13_YEAST	uniprot_sprot.fasta	17,029.8	100.0%	5	5	9	0.0156%	34.4%
Low specificity L-threonine aldolase OS=Saccharomyces cerevisiae (strain ATCC 204508 / S288c) GN=GLY1 PE=1 SV=2	P37303|GLY1_YEAST	uniprot_sprot.fasta	42,815.8	100.0%	4	5	9	0.0156%	14.2%
Putative proline--tRNA ligase YHR020W OS=Saccharomyces cerevisiae (strain ATCC 204508 / S288c) GN=YHR020W PE=1 SV=1	P38708|YHI0_YEAST	uniprot_sprot.fasta	77,387.1	100.0%	4	5	9	0.0156%	10.6%
Dihydroorotase OS=Saccharomyces cerevisiae (strain ATCC 204508 / S288c) GN=URA4 PE=1 SV=2	P20051|PYRC_YEAST	uniprot_sprot.fasta	40,314.0	100.0%	4	5	9	0.0156%	17.3%
Heat shock protein SSA4 OS=Saccharomyces cerevisiae (strain ATCC 204508 / S288c) GN=SSA4 PE=1 SV=3	P22202|HSP74_YEAST	uniprot_sprot.fasta	69,652.7	100.0%	4	4	9	0.0156%	18.2%
40S ribosomal protein S5 OS=Saccharomyces cerevisiae (strain ATCC 204508 / S288c) GN=RPS5 PE=1 SV=3	P26783|RS5_YEAST	uniprot_sprot.fasta	25,038.5	100.0%	3	3	9	0.0156%	11.1%
T-complex protein 1 subunit beta OS=Saccharomyces cerevisiae (strain ATCC 204508 / S288c) GN=CCT2 PE=1 SV=1	P39076|TCPB_YEAST	uniprot_sprot.fasta	57,205.7	100.0%	3	3	9	0.0156%	5.69%
Dihydroxyacetone kinase 1 OS=Saccharomyces cerevisiae (strain ATCC 204508 / S288c) GN=DAK1 PE=1 SV=1	P54838|DAK1_YEAST	uniprot_sprot.fasta	62,208.4	100.0%	8	8	8	0.0157%	19.9%
DNA-directed RNA polymerase I subunit RPA190 OS=Saccharomyces cerevisiae (strain ATCC 204508 / S288c) GN=RPA190 PE=1 SV=2	P10964|RPA1_YEAST	uniprot_sprot.fasta	186,435.3	100.0%	8	8	8	0.0157%	7.87%
DNA-directed RNA polymerase II subunit RPB2 OS=Saccharomyces cerevisiae (strain ATCC 204508 / S288c) GN=RPB2 PE=1 SV=2	P08518|RPB2_YEAST	uniprot_sprot.fasta	138,757.2	100.0%	7	8	8	0.0157%	7.52%
Valine--tRNA ligase, mitochondrial OS=Saccharomyces cerevisiae (strain ATCC 204508 / S288c) GN=VAS1 PE=1 SV=2	P07806|SYV_YEAST	uniprot_sprot.fasta	125,774.7	100.0%	6	6	8	0.0157%	6.43%
60S ribosomal protein L28 OS=Saccharomyces cerevisiae (strain ATCC 204508 / S288c) GN=RPL28 PE=1 SV=3	P02406|RL28_YEAST	uniprot_sprot.fasta	16,721.9	100.0%	5	6	8	0.0157%	26.8%
Low specificity L-threonine aldolase OS=Saccharomyces cerevisiae (strain ATCC 204508 / S288c) GN=GLY1 PE=1 SV=2	P37303|GLY1_YEAST	uniprot_sprot.fasta	42,815.8	100.0%	5	6	8	0.0157%	17.8%
Hit family protein 1 OS=Saccharomyces cerevisiae (strain ATCC 204508 / S288c) GN=HNT1 PE=1 SV=2	Q04344|HNT1_YEAST	uniprot_sprot.fasta	17,680.8	100.0%	5	6	8	0.0157%	32.9%
60S ribosomal protein L9-A OS=Saccharomyces cerevisiae (strain ATCC 204508 / S288c) GN=RPL9A PE=1 SV=2	P05738|RL9A_YEAST	uniprot_sprot.fasta	21,568.8	100.0%	4	5	8	0.0157%	23.0%
Translation initiation factor RLI1 OS=Saccharomyces cerevisiae (strain ATCC 204508 / S288c) GN=RLI1 PE=1 SV=1	Q03195|RLI1_YEAST	uniprot_sprot.fasta	68,343.3	100.0%	5	5	8	0.0157%	10.0%
Mannose-6-phosphate isomerase OS=Saccharomyces cerevisiae (strain ATCC 204508 / S288c) GN=PMI40 PE=1 SV=4	P29952|MPI_YEAST	uniprot_sprot.fasta	48,190.6	100.0%	5	5	8	0.0157%	11.4%
RuvB-like protein 2 OS=Saccharomyces cerevisiae (strain ATCC 204508 / S288c) GN=RVB2 PE=1 SV=1	Q12464|RUVB2_YEAST	uniprot_sprot.fasta	51,613.1	100.0%	5	5	8	0.0157%	13.2%
40S ribosomal protein S24-A OS=Saccharomyces cerevisiae (strain ATCC 204508 / S288c) GN=RPS24A PE=1 SV=1	P0CX31|RS24A_YEAST,P0CX32|RS24B_YEAST	uniprot_sprot.fasta	15,329.0	100.0%	5	5	8	0.0157%	34.1%
Heat shock protein 26 OS=Saccharomyces cerevisiae (strain ATCC 204508 / S288c) GN=HSP26 PE=1 SV=3	P15992|HSP26_YEAST	uniprot_sprot.fasta	23,880.2	100.0%	4	5	8	0.0157%	27.1%
Nucleolar protein 56 OS=Saccharomyces cerevisiae (strain ATCC 204508 / S288c) GN=NOP56 PE=1 SV=1	Q12460|NOP56_YEAST	uniprot_sprot.fasta	56,867.3	100.0%	5	5	8	0.0157%	12.7%
Fimbrin OS=Saccharomyces cerevisiae (strain ATCC 204508 / S288c) GN=SAC6 PE=1 SV=1	P32599|FIMB_YEAST	uniprot_sprot.fasta	71,775.5	100.0%	4	4	8	0.0157%	8.10%
Homoserine kinase OS=Saccharomyces cerevisiae (strain ATCC 204508 / S288c) GN=THR1 PE=1 SV=4	P17423|KHSE_YEAST	uniprot_sprot.fasta	38,713.5	100.0%	4	4	8	0.0157%	10.9%
Arginase OS=Saccharomyces cerevisiae (strain ATCC 204508 / S288c) GN=CAR1 PE=1 SV=1	P00812|ARGI_YEAST	uniprot_sprot.fasta	35,662.7	100.0%	4	4	8	0.0157%	13.5%
Dolichol-phosphate mannosyltransferase OS=Saccharomyces cerevisiae (strain ATCC 204508 / S288c) GN=DPM1 PE=1 SV=3	P14020|DPM1_YEAST	uniprot_sprot.fasta	30,363.4	100.0%	4	4	8	0.0157%	18.7%
T-complex protein 1 subunit beta OS=Saccharomyces cerevisiae (strain ATCC 204508 / S288c) GN=CCT2 PE=1 SV=1	P39076|TCPB_YEAST	uniprot_sprot.fasta	57,205.7	100.0%	4	4	8	0.0157%	8.54%
Tryptophan synthase OS=Saccharomyces cerevisiae (strain ATCC 204508 / S288c) GN=TRP5 PE=1 SV=1	P00931|TRP_YEAST	uniprot_sprot.fasta	76,626.6	100.0%	4	4	8	0.0157%	7.50%
Translationally-controlled tumor protein homolog OS=Saccharomyces cerevisiae (strain ATCC 204508 / S288c) GN=TMA19 PE=1 SV=1	P35691|TCTP_YEAST	uniprot_sprot.fasta	18,741.3	100.0%	3	4	8	0.0157%	22.2%
Homoserine dehydrogenase OS=Saccharomyces cerevisiae (strain ATCC 204508 / S288c) GN=HOM6 PE=1 SV=1	P31116|DHOM_YEAST	uniprot_sprot.fasta	38,503.2	100.0%	3	3	8	0.0157%	11.4%
Asparagine synthetase [glutamine-hydrolyzing] 1 OS=Saccharomyces cerevisiae (strain ATCC 204508 / S288c) GN=ASN1 PE=1 SV=2	P49089|ASNS1_YEAST	uniprot_sprot.fasta	64,472.9	100.0%	3	3	8	0.0157%	11.2%
Ornithine aminotransferase OS=Saccharomyces cerevisiae (strain ATCC 204508 / S288c) GN=CAR2 PE=1 SV=2	P07991|OAT_YEAST	uniprot_sprot.fasta	46,087.0	100.0%	8	8	9	0.0161%	24.8%
10 kDa heat shock protein, mitochondrial OS=Saccharomyces cerevisiae (strain ATCC 204508 / S288c) GN=HSP10 PE=1 SV=1	P38910|CH10_YEAST	uniprot_sprot.fasta	11,372.4	100.0%	6	8	9	0.0161%	63.2%
NADPH dehydrogenase 2 OS=Saccharomyces cerevisiae (strain ATCC 204508 / S288c) GN=OYE2 PE=1 SV=3	Q03558|OYE2_YEAST	uniprot_sprot.fasta	45,012.0	100.0%	6	7	9	0.0161%	17.7%
Alpha,alpha-trehalose-phosphate synthase [UDP-forming] 56 kDa subunit OS=Saccharomyces cerevisiae (strain ATCC 204508 / S288c) GN=TPS1 PE=1 SV=2	Q00764|TPS1_YEAST	uniprot_sprot.fasta	56,148.3	100.0%	6	7	9	0.0161%	12.7%
Transcriptional modulator WTM1 OS=Saccharomyces cerevisiae (strain ATCC 204508 / S288c) GN=WTM1 PE=1 SV=1	Q12363|WTM1_YEAST	uniprot_sprot.fasta	48,383.6	100.0%	6	6	9	0.0161%	21.3%
Dihydrolipoyl dehydrogenase, mitochondrial OS=Saccharomyces cerevisiae (strain ATCC 204508 / S288c) GN=LPD1 PE=1 SV=1	P09624|DLDH_YEAST	uniprot_sprot.fasta	54,010.9	100.0%	6	6	9	0.0161%	17.0%
Farnesyl pyrophosphate synthase OS=Saccharomyces cerevisiae (strain ATCC 204508 / S288c) GN=ERG20 PE=1 SV=2	P08524|FPPS_YEAST	uniprot_sprot.fasta	40,485.3	100.0%	5	5	9	0.0161%	16.8%
40S ribosomal protein S1-B OS=Saccharomyces cerevisiae (strain YJM789) GN=RPS1B PE=3 SV=1	A6ZM02|RS3A2_YEAS7,B3LLJ2|RS3A2_YEAS1,B5VP69|RS3A2_YEAS6,P23248|RS3A2_YEAST	uniprot_sprot.fasta	28,812.9	100.0%	5	5	9	0.0161%	24.3%
ATP synthase subunit gamma, mitochondrial OS=Saccharomyces cerevisiae (strain ATCC 204508 / S288c) GN=ATP3 PE=1 SV=1	P38077|ATPG_YEAST	uniprot_sprot.fasta	34,352.2	100.0%	5	5	9	0.0161%	23.5%
Tryptophan synthase OS=Saccharomyces cerevisiae (strain ATCC 204508 / S288c) GN=TRP5 PE=1 SV=1	P00931|TRP_YEAST	uniprot_sprot.fasta	76,626.6	100.0%	5	5	9	0.0161%	9.90%
6-phosphofructo-2-kinase 1 OS=Saccharomyces cerevisiae (strain ATCC 204508 / S288c) GN=PFK26 PE=1 SV=1	P40433|6P21_YEAST	uniprot_sprot.fasta	93,421.4	100.0%	5	5	9	0.0161%	7.26%
GU4 nucleic-binding protein 1 OS=Saccharomyces cerevisiae (strain ATCC 204508 / S288c) GN=ARC1 PE=1 SV=2	P46672|G4P1_YEAST	uniprot_sprot.fasta	42,084.5	100.0%	5	5	9	0.0161%	18.1%
40S ribosomal protein S14-A OS=Saccharomyces cerevisiae (strain ATCC 204508 / S288c) GN=RPS14A PE=1 SV=5	P06367|RS14A_YEAST,P39516|RS14B_YEAST	uniprot_sprot.fasta	14,536.5	100.0%	4	5	9	0.0161%	34.3%
Dihydroorotate dehydrogenase (fumarate) OS=Saccharomyces cerevisiae (strain ATCC 204508 / S288c) GN=URA1 PE=1 SV=1	P28272|PYRD_YEAST	uniprot_sprot.fasta	34,802.7	100.0%	3	4	9	0.0161%	9.87%
Protein SIS1 OS=Saccharomyces cerevisiae (strain ATCC 204508 / S288c) GN=SIS1 PE=1 SV=1	P25294|SIS1_YEAST	uniprot_sprot.fasta	37,591.6	100.0%	4	4	9	0.0161%	17.0%
Lysine--tRNA ligase, cytoplasmic OS=Saccharomyces cerevisiae (strain ATCC 204508 / S288c) GN=KRS1 PE=1 SV=2	P15180|SYKC_YEAST	uniprot_sprot.fasta	67,960.5	100.0%	4	4	9	0.0161%	7.95%
Cytochrome b-c1 complex subunit 1, mitochondrial OS=Saccharomyces cerevisiae (strain ATCC 204508 / S288c) GN=COR1 PE=1 SV=1	P07256|QCR1_YEAST	uniprot_sprot.fasta	50,229.0	100.0%	8	9	10	0.0174%	21.0%
Acetyl-coenzyme A synthetase 2 OS=Saccharomyces cerevisiae (strain ATCC 204508 / S288c) GN=ACS2 PE=1 SV=1	P52910|ACS2_YEAST	uniprot_sprot.fasta	75,492.2	100.0%	6	6	10	0.0174%	7.61%
Pyruvate dehydrogenase E1 component subunit alpha, mitochondrial OS=Saccharomyces cerevisiae (strain ATCC 204508 / S288c) GN=PDA1 PE=1 SV=2	P16387|ODPA_YEAST	uniprot_sprot.fasta	46,344.4	100.0%	5	6	10	0.0174%	14.5%
Calcium-transporting ATPase 2 OS=Saccharomyces cerevisiae (strain ATCC 204508 / S288c) GN=PMC1 PE=1 SV=1	P38929|ATC2_YEAST	uniprot_sprot.fasta	130,866.4	100.0%	5	5	10	0.0174%	5.29%
Mitochondrial peroxiredoxin PRX1 OS=Saccharomyces cerevisiae (strain ATCC 204508 / S288c) GN=PRX1 PE=1 SV=1	P34227|PRX1_YEAST	uniprot_sprot.fasta	29,496.7	100.0%	4	4	10	0.0174%	17.2%
Nucleolar protein NET1 OS=Saccharomyces cerevisiae (strain ATCC 204508 / S288c) GN=NET1 PE=1 SV=1	P47035|NET1_YEAST	uniprot_sprot.fasta	128,535.1	100.0%	4	4	10	0.0174%	4.54%
Importin subunit beta-4 OS=Saccharomyces cerevisiae (strain ATCC 204508 / S288c) GN=KAP123 PE=1 SV=1	P40069|IMB4_YEAST	uniprot_sprot.fasta	122,605.7	100.0%	4	4	10	0.0174%	4.13%
78 kDa glucose-regulated protein homolog OS=Saccharomyces cerevisiae (strain ATCC 204508 / S288c) GN=KAR2 PE=1 SV=1	P16474|GRP78_YEAST	uniprot_sprot.fasta	74,470.2	100.0%	7	8	9	0.0177%	16.7%
NADPH dehydrogenase 2 OS=Saccharomyces cerevisiae (strain ATCC 204508 / S288c) GN=OYE2 PE=1 SV=3	Q03558|OYE2_YEAST	uniprot_sprot.fasta	45,012.0	100.0%	7	8	9	0.0177%	19.0%
Nucleoside diphosphate kinase OS=Saccharomyces cerevisiae (strain ATCC 204508 / S288c) GN=YNK1 PE=1 SV=1	P36010|NDK_YEAST	uniprot_sprot.fasta	17,166.9	100.0%	5	8	9	0.0177%	41.2%
Aromatic amino acid aminotransferase 2 OS=Saccharomyces cerevisiae (strain ATCC 204508 / S288c) GN=ARO9 PE=1 SV=3	P38840|ARO9_YEAST	uniprot_sprot.fasta	58,530.7	100.0%	8	8	9	0.0177%	19.1%
Dihydroorotate dehydrogenase (fumarate) OS=Saccharomyces cerevisiae (strain ATCC 204508 / S288c) GN=URA1 PE=1 SV=1	P28272|PYRD_YEAST	uniprot_sprot.fasta	34,802.7	100.0%	5	5	9	0.0177%	16.2%
Elongation factor Tu, mitochondrial OS=Saccharomyces cerevisiae (strain ATCC 204508 / S288c) GN=TUF1 PE=1 SV=1	P02992|EFTU_YEAST	uniprot_sprot.fasta	47,972.9	100.0%	5	5	9	0.0177%	17.4%
Long-chain-fatty-acid--CoA ligase 1 OS=Saccharomyces cerevisiae (strain ATCC 204508 / S288c) GN=FAA1 PE=1 SV=1	P30624|LCF1_YEAST	uniprot_sprot.fasta	77,868.1	100.0%	5	5	9	0.0177%	9.29%
40S ribosomal protein S19-A OS=Saccharomyces cerevisiae (strain ATCC 204508 / S288c) GN=RPS19A PE=1 SV=2	P07280|RS19A_YEAST,P07281|RS19B_YEAST	uniprot_sprot.fasta	15,917.4	100.0%	5	5	9	0.0177%	38.9%
Peptidyl-prolyl cis-trans isomerase C, mitochondrial OS=Saccharomyces cerevisiae (strain ATCC 204508 / S288c) GN=CPR3 PE=1 SV=1	P25719|CYPC_YEAST	uniprot_sprot.fasta	19,919.3	100.0%	5	5	9	0.0177%	25.3%
T-complex protein 1 subunit delta OS=Saccharomyces cerevisiae (strain ATCC 204508 / S288c) GN=CCT4 PE=1 SV=2	P39078|TCPD_YEAST	uniprot_sprot.fasta	57,605.6	100.0%	4	4	9	0.0177%	11.2%
Adenylate kinase 1 OS=Saccharomyces cerevisiae (strain YJM789) GN=ADK1 PE=3 SV=1	A6ZYI0|KAD1_YEAS7,B3LG61|KAD1_YEAS1,P07170|KAD1_YEAST	uniprot_sprot.fasta	24,255.8	100.0%	3	4	9	0.0177%	18.9%
Succinyl-CoA ligase [ADP-forming] subunit alpha, mitochondrial OS=Saccharomyces cerevisiae (strain ATCC 204508 / S288c) GN=LSC1 PE=1 SV=1	P53598|SUCA_YEAST	uniprot_sprot.fasta	35,033.5	100.0%	7	8	10	0.0179%	31.3%
Adenosine kinase OS=Saccharomyces cerevisiae (strain ATCC 204508 / S288c) GN=ADO1 PE=1 SV=1	P47143|ADK_YEAST	uniprot_sprot.fasta	36,372.9	100.0%	6	8	10	0.0179%	25.6%
Fatty acid synthase subunit alpha OS=Saccharomyces cerevisiae (strain ATCC 204508 / S288c) GN=FAS2 PE=1 SV=2	P19097|FAS2_YEAST	uniprot_sprot.fasta	206,951.1	100.0%	7	7	10	0.0179%	4.56%
Cys-Gly metallodipeptidase DUG1 OS=Saccharomyces cerevisiae (strain ATCC 204508 / S288c) GN=DUG1 PE=1 SV=1	P43616|DUG1_YEAST	uniprot_sprot.fasta	52,873.2	100.0%	7	7	10	0.0179%	19.8%
Mannose-6-phosphate isomerase OS=Saccharomyces cerevisiae (strain ATCC 204508 / S288c) GN=PMI40 PE=1 SV=4	P29952|MPI_YEAST	uniprot_sprot.fasta	48,190.6	100.0%	6	6	10	0.0179%	14.9%
Phosphoglucomutase-2 OS=Saccharomyces cerevisiae (strain ATCC 204508 / S288c) GN=PGM2 PE=1 SV=1	P37012|PGM2_YEAST	uniprot_sprot.fasta	63,091.2	100.0%	6	6	10	0.0179%	11.6%
Homocitrate synthase, cytosolic isozyme OS=Saccharomyces cerevisiae (strain ATCC 204508 / S288c) GN=LYS20 PE=1 SV=1	P48570|HOSC_YEAST	uniprot_sprot.fasta	47,100.3	100.0%	4	4	10	0.0179%	11.7%
Dihydrolipoyl dehydrogenase, mitochondrial OS=Saccharomyces cerevisiae (strain ATCC 204508 / S288c) GN=LPD1 PE=1 SV=1	P09624|DLDH_YEAST	uniprot_sprot.fasta	54,010.9	100.0%	8	8	11	0.0191%	19.6%
Sister chromatid cohesion protein PDS5 OS=Saccharomyces cerevisiae (strain ATCC 204508 / S288c) GN=PDS5 PE=1 SV=1	Q04264|PDS5_YEAST	uniprot_sprot.fasta	147,051.7	100.0%	8	8	11	0.0191%	6.42%
40S ribosomal protein S9-A OS=Saccharomyces cerevisiae (strain ATCC 204508 / S288c) GN=RPS9A PE=1 SV=3	O13516|RS9A_YEAST,P05755|RS9B_YEAST	uniprot_sprot.fasta	22,443.9	100.0%	7	7	11	0.0191%	27.4%
ATP-dependent RNA helicase DED1 OS=Saccharomyces cerevisiae (strain YJM789) GN=DED1 PE=3 SV=1	A6ZP47|DED1_YEAS7,P06634|DED1_YEAST	uniprot_sprot.fasta	65,554.5	100.0%	5	6	11	0.0191%	12.4%
40S ribosomal protein S14-A OS=Saccharomyces cerevisiae (strain ATCC 204508 / S288c) GN=RPS14A PE=1 SV=5	P06367|RS14A_YEAST,P39516|RS14B_YEAST	uniprot_sprot.fasta	14,536.5	100.0%	5	6	11	0.0191%	34.3%
Phosphomannomutase OS=Saccharomyces cerevisiae (strain ATCC 204508 / S288c) GN=SEC53 PE=1 SV=1	P07283|PMM_YEAST	uniprot_sprot.fasta	29,064.1	100.0%	5	5	11	0.0191%	17.7%
ADP-ribosylation factor 1 OS=Saccharomyces cerevisiae (strain ATCC 204508 / S288c) GN=ARF1 PE=1 SV=3	P11076|ARF1_YEAST	uniprot_sprot.fasta	20,530.1	100.0%	5	5	11	0.0191%	28.7%
Thioredoxin reductase 1 OS=Saccharomyces cerevisiae (strain ATCC 204508 / S288c) GN=TRR1 PE=1 SV=3	P29509|TRXB1_YEAST	uniprot_sprot.fasta	34,239.2	100.0%	4	5	11	0.0191%	11.9%
GMP synthase [glutamine-hydrolyzing] OS=Saccharomyces cerevisiae (strain ATCC 204508 / S288c) GN=GUA1 PE=1 SV=4	P38625|GUAA_YEAST	uniprot_sprot.fasta	58,483.4	100.0%	5	5	11	0.0191%	11.0%
Protein BMH1 OS=Saccharomyces cerevisiae (strain ATCC 204508 / S288c) GN=BMH1 PE=1 SV=4	P29311|BMH1_YEAST	uniprot_sprot.fasta	30,092.0	100.0%	4	4	11	0.0191%	21.7%
T-complex protein 1 subunit delta OS=Saccharomyces cerevisiae (strain ATCC 204508 / S288c) GN=CCT4 PE=1 SV=2	P39078|TCPD_YEAST	uniprot_sprot.fasta	57,605.6	100.0%	4	4	11	0.0191%	11.2%
Proliferating cell nuclear antigen OS=Saccharomyces cerevisiae (strain ATCC 204508 / S288c) GN=POL30 PE=1 SV=1	P15873|PCNA_YEAST	uniprot_sprot.fasta	28,918.1	100.0%	4	4	11	0.0191%	17.1%
Adenylosuccinate lyase OS=Saccharomyces cerevisiae (strain ATCC 204508 / S288c) GN=ADE13 PE=1 SV=1	Q05911|PUR8_YEAST	uniprot_sprot.fasta	54,511.8	100.0%	8	9	10	0.0196%	22.0%
Cell division control protein 12 OS=Saccharomyces cerevisiae (strain ATCC 204508 / S288c) GN=CDC12 PE=1 SV=1	P32468|CDC12_YEAST	uniprot_sprot.fasta	46,668.9	100.0%	7	8	10	0.0196%	20.1%
Inosine-5'-monophosphate dehydrogenase 3 OS=Saccharomyces cerevisiae (strain ATCC 204508 / S288c) GN=IMD3 PE=1 SV=1	P50095|IMDH3_YEAST	uniprot_sprot.fasta	56,586.2	100.0%	7	8	10	0.0196%	17.2%
40S ribosomal protein S20 OS=Saccharomyces cerevisiae (strain ATCC 204508 / S288c) GN=RPS20 PE=1 SV=3	P38701|RS20_YEAST	uniprot_sprot.fasta	13,906.8	100.0%	5	8	10	0.0196%	33.9%
Succinyl-CoA ligase [ADP-forming] subunit alpha, mitochondrial OS=Saccharomyces cerevisiae (strain ATCC 204508 / S288c) GN=LSC1 PE=1 SV=1	P53598|SUCA_YEAST	uniprot_sprot.fasta	35,033.5	100.0%	7	7	10	0.0196%	31.3%
Adenosine kinase OS=Saccharomyces cerevisiae (strain ATCC 204508 / S288c) GN=ADO1 PE=1 SV=1	P47143|ADK_YEAST	uniprot_sprot.fasta	36,372.9	100.0%	4	7	10	0.0196%	19.4%
40S ribosomal protein S17-A OS=Saccharomyces cerevisiae (strain ATCC 204508 / S288c) GN=RPS17A PE=1 SV=1	P02407|RS17A_YEAST,P14127|RS17B_YEAST	uniprot_sprot.fasta	15,788.9	100.0%	6	7	10	0.0196%	41.9%
40S ribosomal protein S1-B OS=Saccharomyces cerevisiae (strain YJM789) GN=RPS1B PE=3 SV=1	A6ZM02|RS3A2_YEAS7,B3LLJ2|RS3A2_YEAS1,B5VP69|RS3A2_YEAS6,P23248|RS3A2_YEAST	uniprot_sprot.fasta	28,812.9	100.0%	6	6	10	0.0196%	23.5%
Low-affinity Fe(2+) transport protein OS=Saccharomyces cerevisiae (strain ATCC 204508 / S288c) GN=FET4 PE=1 SV=2	P40988|FET4_YEAST	uniprot_sprot.fasta	62,793.3	100.0%	6	6	10	0.0196%	14.1%
40S ribosomal protein S12 OS=Saccharomyces cerevisiae (strain ATCC 204508 / S288c) GN=RPS12 PE=1 SV=1	P48589|RS12_YEAST	uniprot_sprot.fasta	15,470.9	100.0%	5	6	10	0.0196%	31.5%
Eukaryotic translation initiation factor 5A-1 OS=Saccharomyces cerevisiae (strain ATCC 204508 / S288c) GN=HYP2 PE=1 SV=3	P23301|IF5A1_YEAST	uniprot_sprot.fasta	17,114.6	100.0%	4	5	10	0.0196%	30.6%
2-isopropylmalate synthase OS=Saccharomyces cerevisiae (strain ATCC 204508 / S288c) GN=LEU4 PE=1 SV=1	P06208|LEU1_YEAST	uniprot_sprot.fasta	68,409.3	100.0%	4	4	10	0.0196%	7.59%
Heat shock protein STI1 OS=Saccharomyces cerevisiae (strain ATCC 204508 / S288c) GN=STI1 PE=1 SV=1	P15705|STI1_YEAST	uniprot_sprot.fasta	66,267.6	100.0%	5	5	11	0.0197%	13.2%
Serine/threonine-protein kinase KSP1 OS=Saccharomyces cerevisiae (strain ATCC 204508 / S288c) GN=KSP1 PE=1 SV=1	P38691|KSP1_YEAST	uniprot_sprot.fasta	117,085.4	100.0%	4	4	11	0.0197%	4.76%
Superoxide dismutase [Cu-Zn] OS=Saccharomyces cerevisiae (strain ATCC 204508 / S288c) GN=SOD1 PE=1 SV=2	P00445|SODC_YEAST	uniprot_sprot.fasta	15,854.0	100.0%	3	4	11	0.0197%	36.4%
Alcohol dehydrogenase 3, mitochondrial OS=Saccharomyces cerevisiae (strain ATCC 204508 / S288c) GN=ADH3 PE=1 SV=2	P07246|ADH3_YEAST	uniprot_sprot.fasta	40,369.8	100.0%	3	3	11	0.0197%	7.47%
60S ribosomal protein L20-A OS=Saccharomyces cerevisiae (strain ATCC 204508 / S288c) GN=RPL20A PE=1 SV=1	P0CX23|RL20A_YEAST,P0CX24|RL20B_YEAST	uniprot_sprot.fasta	20,437.1	100.0%	9	10	12	0.0208%	42.4%
DNA-directed RNA polymerase I subunit RPA190 OS=Saccharomyces cerevisiae (strain ATCC 204508 / S288c) GN=RPA190 PE=1 SV=2	P10964|RPA1_YEAST	uniprot_sprot.fasta	186,435.3	100.0%	9	10	12	0.0208%	8.77%
Inosine-5'-monophosphate dehydrogenase 3 OS=Saccharomyces cerevisiae (strain ATCC 204508 / S288c) GN=IMD3 PE=1 SV=1	P50095|IMDH3_YEAST	uniprot_sprot.fasta	56,586.2	100.0%	8	9	12	0.0208%	20.7%
Transcription elongation factor SPT6 OS=Saccharomyces cerevisiae (strain ATCC 204508 / S288c) GN=SPT6 PE=1 SV=1	P23615|SPT6_YEAST	uniprot_sprot.fasta	168,298.5	100.0%	9	9	12	0.0208%	7.24%
2-oxoglutarate dehydrogenase, mitochondrial OS=Saccharomyces cerevisiae (strain ATCC 204508 / S288c) GN=KGD1 PE=1 SV=2	P20967|ODO1_YEAST	uniprot_sprot.fasta	114,419.3	100.0%	9	9	12	0.0208%	11.4%
Aspartate--tRNA ligase, cytoplasmic OS=Saccharomyces cerevisiae (strain ATCC 204508 / S288c) GN=DPS1 PE=1 SV=3	P04802|SYDC_YEAST	uniprot_sprot.fasta	63,517.8	100.0%	8	8	12	0.0208%	18.3%
Heat shock protein STI1 OS=Saccharomyces cerevisiae (strain ATCC 204508 / S288c) GN=STI1 PE=1 SV=1	P15705|STI1_YEAST	uniprot_sprot.fasta	66,267.6	100.0%	3	5	12	0.0208%	8.83%
Threonine--tRNA ligase, cytoplasmic OS=Saccharomyces cerevisiae (strain ATCC 204508 / S288c) GN=THS1 PE=1 SV=2	P04801|SYTC_YEAST	uniprot_sprot.fasta	84,522.6	100.0%	4	5	12	0.0208%	6.54%
2-isopropylmalate synthase OS=Saccharomyces cerevisiae (strain ATCC 204508 / S288c) GN=LEU4 PE=1 SV=1	P06208|LEU1_YEAST	uniprot_sprot.fasta	68,409.3	100.0%	5	5	12	0.0208%	9.05%
RuvB-like protein 1 OS=Saccharomyces cerevisiae (strain ATCC 204508 / S288c) GN=RVB1 PE=1 SV=1	Q03940|RUVB1_YEAST	uniprot_sprot.fasta	50,454.0	100.0%	4	4	12	0.0208%	13.2%
1,3-beta-glucan synthase component FKS1 OS=Saccharomyces cerevisiae (strain ATCC 204508 / S288c) GN=FKS1 PE=1 SV=2	P38631|FKS1_YEAST	uniprot_sprot.fasta	214,859.4	100.0%	10	10	12	0.0214%	6.82%
NADP-specific glutamate dehydrogenase 1 OS=Saccharomyces cerevisiae (strain ATCC 204508 / S288c) GN=GDH1 PE=1 SV=2	P07262|DHE4_YEAST	uniprot_sprot.fasta	49,570.2	100.0%	7	7	12	0.0214%	21.1%
Isocitrate dehydrogenase [NADP] cytoplasmic OS=Saccharomyces cerevisiae (strain ATCC 204508 / S288c) GN=IDP2 PE=1 SV=2	P41939|IDHC_YEAST	uniprot_sprot.fasta	46,563.8	100.0%	7	7	12	0.0214%	25.0%
Phosphoribosylformylglycinamidine synthase OS=Saccharomyces cerevisiae (strain ATCC 204508 / S288c) GN=ADE6 PE=1 SV=2	P38972|PUR4_YEAST	uniprot_sprot.fasta	148,909.2	100.0%	7	7	12	0.0214%	5.67%
Long-chain-fatty-acid--CoA ligase 1 OS=Saccharomyces cerevisiae (strain ATCC 204508 / S288c) GN=FAA1 PE=1 SV=1	P30624|LCF1_YEAST	uniprot_sprot.fasta	77,868.1	100.0%	6	7	12	0.0214%	10.4%
Serine--tRNA ligase, cytoplasmic OS=Saccharomyces cerevisiae (strain ATCC 204508 / S288c) GN=SES1 PE=1 SV=2	P07284|SYSC_YEAST	uniprot_sprot.fasta	53,311.0	100.0%	6	6	12	0.0214%	15.8%
Bifunctional purine biosynthetic protein ADE5,7 OS=Saccharomyces cerevisiae (strain ATCC 204508 / S288c) GN=ADE5,7 PE=1 SV=1	P07244|PUR2_YEAST	uniprot_sprot.fasta	86,068.6	100.0%	5	5	12	0.0214%	8.48%
Translationally-controlled tumor protein homolog OS=Saccharomyces cerevisiae (strain ATCC 204508 / S288c) GN=TMA19 PE=1 SV=1	P35691|TCTP_YEAST	uniprot_sprot.fasta	18,741.3	100.0%	4	4	12	0.0214%	29.3%
Transcriptional modulator WTM1 OS=Saccharomyces cerevisiae (strain ATCC 204508 / S288c) GN=WTM1 PE=1 SV=1	Q12363|WTM1_YEAST	uniprot_sprot.fasta	48,383.6	100.0%	7	8	11	0.0216%	24.0%
5-methyltetrahydropteroyltriglutamate--homocysteine methyltransferase OS=Saccharomyces cerevisiae (strain ATCC 204508 / S288c) GN=MET6 PE=1 SV=4	P05694|METE_YEAST	uniprot_sprot.fasta	85,862.4	100.0%	7	8	11	0.0216%	10.0%
40S ribosomal protein S9-A OS=Saccharomyces cerevisiae (strain ATCC 204508 / S288c) GN=RPS9A PE=1 SV=3	O13516|RS9A_YEAST,P05755|RS9B_YEAST	uniprot_sprot.fasta	22,443.9	100.0%	7	8	11	0.0216%	28.9%
Acetyl-coenzyme A synthetase 2 OS=Saccharomyces cerevisiae (strain ATCC 204508 / S288c) GN=ACS2 PE=1 SV=1	P52910|ACS2_YEAST	uniprot_sprot.fasta	75,492.2	100.0%	7	7	11	0.0216%	10.2%
Putative proline--tRNA ligase YHR020W OS=Saccharomyces cerevisiae (strain ATCC 204508 / S288c) GN=YHR020W PE=1 SV=1	P38708|YHI0_YEAST	uniprot_sprot.fasta	77,387.1	100.0%	5	7	11	0.0216%	9.01%
Protein BMH1 OS=Saccharomyces cerevisiae (strain ATCC 204508 / S288c) GN=BMH1 PE=1 SV=4	P29311|BMH1_YEAST	uniprot_sprot.fasta	30,092.0	100.0%	6	6	11	0.0216%	27.0%
Nascent polypeptide-associated complex subunit alpha OS=Saccharomyces cerevisiae (strain YJM789) GN=EGD2 PE=3 SV=1	A6ZT99|NACA_YEAS7,P38879|NACA_YEAST	uniprot_sprot.fasta	18,709.1	100.0%	6	6	11	0.0216%	47.7%
Lysine--tRNA ligase, cytoplasmic OS=Saccharomyces cerevisiae (strain ATCC 204508 / S288c) GN=KRS1 PE=1 SV=2	P15180|SYKC_YEAST	uniprot_sprot.fasta	67,960.5	100.0%	6	6	11	0.0216%	13.2%
Protein MMF1, mitochondrial OS=Saccharomyces cerevisiae (strain ATCC 204508 / S288c) GN=MMF1 PE=1 SV=1	P40185|MMF1_YEAST	uniprot_sprot.fasta	15,908.1	100.0%	5	6	11	0.0216%	41.4%
Threonine--tRNA ligase, cytoplasmic OS=Saccharomyces cerevisiae (strain ATCC 204508 / S288c) GN=THS1 PE=1 SV=2	P04801|SYTC_YEAST	uniprot_sprot.fasta	84,522.6	100.0%	6	6	11	0.0216%	8.72%
Superoxide dismutase [Cu-Zn] OS=Saccharomyces cerevisiae (strain ATCC 204508 / S288c) GN=SOD1 PE=1 SV=2	P00445|SODC_YEAST	uniprot_sprot.fasta	15,854.0	100.0%	4	5	11	0.0216%	48.1%
Phosphoenolpyruvate carboxykinase [ATP] OS=Saccharomyces cerevisiae (strain ATCC 204508 / S288c) GN=PCK1 PE=1 SV=2	P10963|PCKA_YEAST	uniprot_sprot.fasta	60,984.4	100.0%	5	5	11	0.0216%	11.7%
Glycogen phosphorylase OS=Saccharomyces cerevisiae (strain ATCC 204508 / S288c) GN=GPH1 PE=1 SV=4	P06738|PHSG_YEAST	uniprot_sprot.fasta	103,279.2	100.0%	9	10	13	0.0226%	16.5%
ATP synthase subunit gamma, mitochondrial OS=Saccharomyces cerevisiae (strain ATCC 204508 / S288c) GN=ATP3 PE=1 SV=1	P38077|ATPG_YEAST	uniprot_sprot.fasta	34,352.2	100.0%	9	9	13	0.0226%	29.3%
DNA-directed RNA polymerase II subunit RPB2 OS=Saccharomyces cerevisiae (strain ATCC 204508 / S288c) GN=RPB2 PE=1 SV=2	P08518|RPB2_YEAST	uniprot_sprot.fasta	138,757.2	100.0%	8	9	13	0.0226%	9.07%
40S ribosomal protein S6-A OS=Saccharomyces cerevisiae (strain ATCC 204508 / S288c) GN=RPS6A PE=1 SV=1	P0CX37|RS6A_YEAST,P0CX38|RS6B_YEAST	uniprot_sprot.fasta	26,997.2	100.0%	9	9	13	0.0226%	38.1%
Sphingolipid long chain base-responsive protein PIL1 OS=Saccharomyces cerevisiae (strain ATCC 204508 / S288c) GN=PIL1 PE=1 SV=1	P53252|PIL1_YEAST	uniprot_sprot.fasta	38,350.3	100.0%	7	8	13	0.0226%	19.8%
Transcriptional modulator WTM1 OS=Saccharomyces cerevisiae (strain ATCC 204508 / S288c) GN=WTM1 PE=1 SV=1	Q12363|WTM1_YEAST	uniprot_sprot.fasta	48,383.6	100.0%	6	7	13	0.0226%	21.1%
General transcriptional corepressor TUP1 OS=Saccharomyces cerevisiae (strain ATCC 204508 / S288c) GN=TUP1 PE=1 SV=2	P16649|TUP1_YEAST	uniprot_sprot.fasta	78,307.2	100.0%	5	7	13	0.0226%	9.54%
40S ribosomal protein S1-B OS=Saccharomyces cerevisiae (strain YJM789) GN=RPS1B PE=3 SV=1	A6ZM02|RS3A2_YEAS7,B3LLJ2|RS3A2_YEAS1,B5VP69|RS3A2_YEAS6,P23248|RS3A2_YEAST	uniprot_sprot.fasta	28,812.9	100.0%	5	6	13	0.0226%	20.8%
Homocitrate synthase, cytosolic isozyme OS=Saccharomyces cerevisiae (strain ATCC 204508 / S288c) GN=LYS20 PE=1 SV=1	P48570|HOSC_YEAST	uniprot_sprot.fasta	47,100.3	100.0%	6	6	13	0.0226%	15.2%
Inosine-5'-monophosphate dehydrogenase 3 OS=Saccharomyces cerevisiae (strain ATCC 204508 / S288c) GN=IMD3 PE=1 SV=1	P50095|IMDH3_YEAST	uniprot_sprot.fasta	56,586.2	100.0%	9	10	13	0.0232%	23.7%
Thioredoxin reductase 1 OS=Saccharomyces cerevisiae (strain ATCC 204508 / S288c) GN=TRR1 PE=1 SV=3	P29509|TRXB1_YEAST	uniprot_sprot.fasta	34,239.2	100.0%	7	8	13	0.0232%	27.0%
Succinate dehydrogenase [ubiquinone] flavoprotein subunit, mitochondrial OS=Saccharomyces cerevisiae (strain ATCC 204508 / S288c) GN=SDH1 PE=1 SV=1	Q00711|DHSA_YEAST	uniprot_sprot.fasta	70,230.1	100.0%	5	5	13	0.0232%	9.69%
UTP--glucose-1-phosphate uridylyltransferase OS=Saccharomyces cerevisiae (strain ATCC 204508 / S288c) GN=UGP1 PE=1 SV=1	P32861|UGPA1_YEAST	uniprot_sprot.fasta	55,989.9	100.0%	9	10	12	0.0235%	21.6%
1,3-beta-glucan synthase component FKS1 OS=Saccharomyces cerevisiae (strain ATCC 204508 / S288c) GN=FKS1 PE=1 SV=2	P38631|FKS1_YEAST	uniprot_sprot.fasta	214,859.4	100.0%	9	9	12	0.0235%	5.92%
40S ribosomal protein S13 OS=Saccharomyces cerevisiae (strain ATCC 204508 / S288c) GN=RPS13 PE=1 SV=3	P05756|RS13_YEAST	uniprot_sprot.fasta	17,029.8	100.0%	7	8	12	0.0235%	43.7%
Ornithine aminotransferase OS=Saccharomyces cerevisiae (strain ATCC 204508 / S288c) GN=CAR2 PE=1 SV=2	P07991|OAT_YEAST	uniprot_sprot.fasta	46,087.0	100.0%	7	8	12	0.0235%	21.9%
Dihydrolipoyl dehydrogenase, mitochondrial OS=Saccharomyces cerevisiae (strain ATCC 204508 / S288c) GN=LPD1 PE=1 SV=1	P09624|DLDH_YEAST	uniprot_sprot.fasta	54,010.9	100.0%	8	8	12	0.0235%	20.0%
40S ribosomal protein S6-A OS=Saccharomyces cerevisiae (strain ATCC 204508 / S288c) GN=RPS6A PE=1 SV=1	P0CX37|RS6A_YEAST,P0CX38|RS6B_YEAST	uniprot_sprot.fasta	26,997.2	100.0%	7	7	12	0.0235%	33.9%
Mitochondrial outer membrane protein porin 1 OS=Saccharomyces cerevisiae (strain ATCC 204508 / S288c) GN=POR1 PE=1 SV=4	P04840|VDAC1_YEAST	uniprot_sprot.fasta	30,429.5	100.0%	6	6	12	0.0235%	26.5%
Succinate dehydrogenase [ubiquinone] flavoprotein subunit, mitochondrial OS=Saccharomyces cerevisiae (strain ATCC 204508 / S288c) GN=SDH1 PE=1 SV=1	Q00711|DHSA_YEAST	uniprot_sprot.fasta	70,230.1	100.0%	6	6	12	0.0235%	13.6%
Phosphomannomutase OS=Saccharomyces cerevisiae (strain ATCC 204508 / S288c) GN=SEC53 PE=1 SV=1	P07283|PMM_YEAST	uniprot_sprot.fasta	29,064.1	100.0%	5	5	12	0.0235%	14.6%
Actin-binding protein OS=Saccharomyces cerevisiae (strain ATCC 204508 / S288c) GN=ABP1 PE=1 SV=4	P15891|ABP1_YEAST	uniprot_sprot.fasta	65,578.2	100.0%	3	4	12	0.0235%	8.95%
Protein SIS1 OS=Saccharomyces cerevisiae (strain ATCC 204508 / S288c) GN=SIS1 PE=1 SV=1	P25294|SIS1_YEAST	uniprot_sprot.fasta	37,591.6	100.0%	4	4	12	0.0235%	15.9%
Transaldolase OS=Saccharomyces cerevisiae (strain ATCC 204508 / S288c) GN=TAL1 PE=1 SV=4	P15019|TAL1_YEAST	uniprot_sprot.fasta	37,037.6	100.0%	8	10	14	0.0243%	28.1%
UTP--glucose-1-phosphate uridylyltransferase OS=Saccharomyces cerevisiae (strain ATCC 204508 / S288c) GN=UGP1 PE=1 SV=1	P32861|UGPA1_YEAST	uniprot_sprot.fasta	55,989.9	100.0%	8	9	14	0.0243%	19.8%
Asparagine--tRNA ligase, cytoplasmic OS=Saccharomyces cerevisiae (strain ATCC 204508 / S288c) GN=DED81 PE=1 SV=1	P38707|SYNC_YEAST	uniprot_sprot.fasta	62,208.6	100.0%	8	9	14	0.0243%	18.8%
5-methyltetrahydropteroyltriglutamate--homocysteine methyltransferase OS=Saccharomyces cerevisiae (strain ATCC 204508 / S288c) GN=MET6 PE=1 SV=4	P05694|METE_YEAST	uniprot_sprot.fasta	85,862.4	100.0%	6	7	14	0.0243%	8.21%
Serine/threonine-protein kinase KSP1 OS=Saccharomyces cerevisiae (strain ATCC 204508 / S288c) GN=KSP1 PE=1 SV=1	P38691|KSP1_YEAST	uniprot_sprot.fasta	117,085.4	100.0%	7	7	14	0.0243%	7.77%
Ribonucleoside-diphosphate reductase small chain 2 OS=Saccharomyces cerevisiae (strain ATCC 204508 / S288c) GN=RNR4 PE=1 SV=1	P49723|RIR4_YEAST	uniprot_sprot.fasta	40,056.8	100.0%	6	6	14	0.0243%	21.7%
60S ribosomal protein L23-A OS=Saccharomyces cerevisiae (strain ATCC 204508 / S288c) GN=RPL23A PE=1 SV=1	P0CX41|RL23A_YEAST,P0CX42|RL23B_YEAST	uniprot_sprot.fasta	14,473.1	100.0%	5	6	14	0.0243%	23.4%
Hydroxymethylglutaryl-CoA synthase OS=Saccharomyces cerevisiae (strain ATCC 204508 / S288c) GN=ERG13 PE=1 SV=1	P54839|HMCS_YEAST	uniprot_sprot.fasta	55,015.2	100.0%	5	5	14	0.0243%	13.2%
Protein SIS1 OS=Saccharomyces cerevisiae (strain ATCC 204508 / S288c) GN=SIS1 PE=1 SV=1	P25294|SIS1_YEAST	uniprot_sprot.fasta	37,591.6	100.0%	5	5	14	0.0243%	19.3%
Asparagine synthetase [glutamine-hydrolyzing] 1 OS=Saccharomyces cerevisiae (strain ATCC 204508 / S288c) GN=ASN1 PE=1 SV=2	P49089|ASNS1_YEAST	uniprot_sprot.fasta	64,472.9	100.0%	5	5	14	0.0243%	17.1%
DNA-binding protein RAP1 OS=Saccharomyces cerevisiae (strain ATCC 204508 / S288c) GN=RAP1 PE=1 SV=2	P11938|RAP1_YEAST	uniprot_sprot.fasta	92,415.5	100.0%	4	4	14	0.0243%	5.80%
DNA damage tolerance protein RHC31 OS=Saccharomyces cerevisiae (strain ATCC 204508 / S288c) GN=AOS1 PE=1 SV=1	Q06624|RHC31_YEAST	uniprot_sprot.fasta	39,275.0	100.0%	4	4	14	0.0243%	12.4%
Isocitrate dehydrogenase [NADP], mitochondrial OS=Saccharomyces cerevisiae (strain ATCC 204508 / S288c) GN=IDP1 PE=1 SV=1	P21954|IDHP_YEAST	uniprot_sprot.fasta	48,192.8	100.0%	11	11	14	0.0250%	28.5%
Asparagine synthetase [glutamine-hydrolyzing] 2 OS=Saccharomyces cerevisiae (strain ATCC 204508 / S288c) GN=ASN2 PE=1 SV=2	P49090|ASNS2_YEAST	uniprot_sprot.fasta	64,595.5	100.0%	9	9	14	0.0250%	17.3%
Aspartate--tRNA ligase, cytoplasmic OS=Saccharomyces cerevisiae (strain ATCC 204508 / S288c) GN=DPS1 PE=1 SV=3	P04802|SYDC_YEAST	uniprot_sprot.fasta	63,517.8	100.0%	8	8	14	0.0250%	18.3%
Uncharacterized oxidoreductase YMR226C OS=Saccharomyces cerevisiae (strain ATCC 204508 / S288c) GN=YMR226C PE=1 SV=1	Q05016|YM71_YEAST	uniprot_sprot.fasta	29,159.7	100.0%	5	7	14	0.0250%	19.9%
ADP-ribosylation factor 1 OS=Saccharomyces cerevisiae (strain ATCC 204508 / S288c) GN=ARF1 PE=1 SV=3	P11076|ARF1_YEAST	uniprot_sprot.fasta	20,530.1	100.0%	6	7	14	0.0250%	35.4%
Importin subunit beta-4 OS=Saccharomyces cerevisiae (strain ATCC 204508 / S288c) GN=KAP123 PE=1 SV=1	P40069|IMB4_YEAST	uniprot_sprot.fasta	122,605.7	100.0%	6	6	14	0.0250%	6.56%
GMP synthase [glutamine-hydrolyzing] OS=Saccharomyces cerevisiae (strain ATCC 204508 / S288c) GN=GUA1 PE=1 SV=4	P38625|GUAA_YEAST	uniprot_sprot.fasta	58,483.4	100.0%	6	6	14	0.0250%	15.4%
Protein MMF1, mitochondrial OS=Saccharomyces cerevisiae (strain ATCC 204508 / S288c) GN=MMF1 PE=1 SV=1	P40185|MMF1_YEAST	uniprot_sprot.fasta	15,908.1	100.0%	4	6	14	0.0250%	33.8%
Hydroxymethylglutaryl-CoA synthase OS=Saccharomyces cerevisiae (strain ATCC 204508 / S288c) GN=ERG13 PE=1 SV=1	P54839|HMCS_YEAST	uniprot_sprot.fasta	55,015.2	100.0%	5	5	14	0.0250%	12.8%
Phosphomannomutase OS=Saccharomyces cerevisiae (strain ATCC 204508 / S288c) GN=SEC53 PE=1 SV=1	P07283|PMM_YEAST	uniprot_sprot.fasta	29,064.1	100.0%	4	4	14	0.0250%	17.3%
Fumarate hydratase, mitochondrial OS=Saccharomyces cerevisiae (strain ATCC 204508 / S288c) GN=FUM1 PE=1 SV=2	P08417|FUMH_YEAST	uniprot_sprot.fasta	53,152.6	100.0%	3	3	14	0.0250%	7.38%
60S ribosomal protein L20-A OS=Saccharomyces cerevisiae (strain ATCC 204508 / S288c) GN=RPL20A PE=1 SV=1	P0CX23|RL20A_YEAST,P0CX24|RL20B_YEAST	uniprot_sprot.fasta	20,437.1	100.0%	9	10	13	0.0255%	37.2%
RuvB-like protein 1 OS=Saccharomyces cerevisiae (strain ATCC 204508 / S288c) GN=RVB1 PE=1 SV=1	Q03940|RUVB1_YEAST	uniprot_sprot.fasta	50,454.0	100.0%	9	9	13	0.0255%	26.1%
Serine--tRNA ligase, cytoplasmic OS=Saccharomyces cerevisiae (strain ATCC 204508 / S288c) GN=SES1 PE=1 SV=2	P07284|SYSC_YEAST	uniprot_sprot.fasta	53,311.0	100.0%	7	7	13	0.0255%	17.5%
Importin subunit beta-4 OS=Saccharomyces cerevisiae (strain ATCC 204508 / S288c) GN=KAP123 PE=1 SV=1	P40069|IMB4_YEAST	uniprot_sprot.fasta	122,605.7	100.0%	7	7	13	0.0255%	7.01%
GMP synthase [glutamine-hydrolyzing] OS=Saccharomyces cerevisiae (strain ATCC 204508 / S288c) GN=GUA1 PE=1 SV=4	P38625|GUAA_YEAST	uniprot_sprot.fasta	58,483.4	100.0%	6	7	13	0.0255%	12.8%
DNA damage tolerance protein RHC31 OS=Saccharomyces cerevisiae (strain ATCC 204508 / S288c) GN=AOS1 PE=1 SV=1	Q06624|RHC31_YEAST	uniprot_sprot.fasta	39,275.0	100.0%	6	6	13	0.0255%	17.6%
60S ribosomal protein L4-A OS=Saccharomyces cerevisiae (strain ATCC 204508 / S288c) GN=RPL4A PE=1 SV=4	P10664|RL4A_YEAST	uniprot_sprot.fasta	39,092.0	100.0%	4	5	13	0.0255%	18.8%
Alcohol dehydrogenase 3, mitochondrial OS=Saccharomyces cerevisiae (strain ATCC 204508 / S288c) GN=ADH3 PE=1 SV=2	P07246|ADH3_YEAST	uniprot_sprot.fasta	40,369.8	100.0%	4	4	13	0.0255%	9.60%
Glycine--tRNA ligase 1, mitochondrial OS=Saccharomyces cerevisiae (strain ATCC 204508 / S288c) GN=GRS1 PE=1 SV=3	P38088|SYG_YEAST	uniprot_sprot.fasta	78,186.6	100.0%	6	8	15	0.0260%	12.3%
Guanine nucleotide-binding protein subunit beta-like protein OS=Saccharomyces cerevisiae (strain ATCC 204508 / S288c) GN=ASC1 PE=1 SV=4	P38011|GBLP_YEAST	uniprot_sprot.fasta	34,805.9	100.0%	8	8	15	0.0260%	25.7%
Acetyl-CoA acetyltransferase OS=Saccharomyces cerevisiae (strain ATCC 204508 / S288c) GN=ERG10 PE=1 SV=3	P41338|THIL_YEAST	uniprot_sprot.fasta	41,728.6	100.0%	7	7	15	0.0260%	20.1%
Uncharacterized GTP-binding protein OLA1 OS=Saccharomyces cerevisiae (strain ATCC 204508 / S288c) GN=OLA1 PE=1 SV=1	P38219|OLA1_YEAST	uniprot_sprot.fasta	44,175.9	100.0%	7	7	15	0.0260%	21.1%
Arginine--tRNA ligase, cytoplasmic OS=Saccharomyces cerevisiae (strain ATCC 204508 / S288c) GN=YDR341C PE=1 SV=1	Q05506|SYRC_YEAST	uniprot_sprot.fasta	69,527.8	100.0%	6	6	15	0.0260%	11.5%
Serine--tRNA ligase, cytoplasmic OS=Saccharomyces cerevisiae (strain ATCC 204508 / S288c) GN=SES1 PE=1 SV=2	P07284|SYSC_YEAST	uniprot_sprot.fasta	53,311.0	100.0%	5	6	15	0.0260%	12.1%
60S ribosomal protein L4-A OS=Saccharomyces cerevisiae (strain ATCC 204508 / S288c) GN=RPL4A PE=1 SV=4	P10664|RL4A_YEAST	uniprot_sprot.fasta	39,092.0	100.0%	5	5	15	0.0260%	24.9%
Aromatic/aminoadipate aminotransferase 1 OS=Saccharomyces cerevisiae (strain ATCC 204508 / S288c) GN=ARO8 PE=1 SV=1	P53090|ARO8_YEAST	uniprot_sprot.fasta	56,180.5	100.0%	5	5	15	0.0260%	12.2%
Fimbrin OS=Saccharomyces cerevisiae (strain ATCC 204508 / S288c) GN=SAC6 PE=1 SV=1	P32599|FIMB_YEAST	uniprot_sprot.fasta	71,775.5	100.0%	5	5	15	0.0260%	9.97%
UTP--glucose-1-phosphate uridylyltransferase OS=Saccharomyces cerevisiae (strain ATCC 204508 / S288c) GN=UGP1 PE=1 SV=1	P32861|UGPA1_YEAST	uniprot_sprot.fasta	55,989.9	100.0%	10	11	15	0.0268%	23.6%
Peptidyl-prolyl cis-trans isomerase OS=Saccharomyces cerevisiae (strain ATCC 204508 / S288c) GN=CPR1 PE=1 SV=3	P14832|CYPH_YEAST	uniprot_sprot.fasta	17,390.7	100.0%	5	8	15	0.0268%	36.4%
Pyruvate dehydrogenase E1 component subunit beta, mitochondrial OS=Saccharomyces cerevisiae (strain ATCC 204508 / S288c) GN=PDB1 PE=1 SV=2	P32473|ODPB_YEAST	uniprot_sprot.fasta	40,054.2	100.0%	8	8	15	0.0268%	23.2%
Branched-chain-amino-acid aminotransferase, mitochondrial OS=Saccharomyces cerevisiae (strain ATCC 204508 / S288c) GN=BAT1 PE=1 SV=1	P38891|BCA1_YEAST	uniprot_sprot.fasta	43,597.5	100.0%	6	7	15	0.0268%	20.4%
Mitochondrial outer membrane protein porin 1 OS=Saccharomyces cerevisiae (strain ATCC 204508 / S288c) GN=POR1 PE=1 SV=4	P04840|VDAC1_YEAST	uniprot_sprot.fasta	30,429.5	100.0%	7	7	15	0.0268%	29.3%
Glucokinase-1 OS=Saccharomyces cerevisiae (strain ATCC 204508 / S288c) GN=GLK1 PE=1 SV=1	P17709|HXKG_YEAST	uniprot_sprot.fasta	55,379.1	100.0%	7	9	14	0.0275%	20.0%
ATP synthase subunit gamma, mitochondrial OS=Saccharomyces cerevisiae (strain ATCC 204508 / S288c) GN=ATP3 PE=1 SV=1	P38077|ATPG_YEAST	uniprot_sprot.fasta	34,352.2	100.0%	8	9	14	0.0275%	29.9%
Homocitrate synthase, cytosolic isozyme OS=Saccharomyces cerevisiae (strain ATCC 204508 / S288c) GN=LYS20 PE=1 SV=1	P48570|HOSC_YEAST	uniprot_sprot.fasta	47,100.3	100.0%	8	8	14	0.0275%	19.6%
ADP-ribosylation factor 1 OS=Saccharomyces cerevisiae (strain ATCC 204508 / S288c) GN=ARF1 PE=1 SV=3	P11076|ARF1_YEAST	uniprot_sprot.fasta	20,530.1	100.0%	6	7	14	0.0275%	36.5%
Cys-Gly metallodipeptidase DUG1 OS=Saccharomyces cerevisiae (strain ATCC 204508 / S288c) GN=DUG1 PE=1 SV=1	P43616|DUG1_YEAST	uniprot_sprot.fasta	52,873.2	100.0%	7	7	14	0.0275%	17.7%
40S ribosomal protein S14-A OS=Saccharomyces cerevisiae (strain ATCC 204508 / S288c) GN=RPS14A PE=1 SV=5	P06367|RS14A_YEAST,P39516|RS14B_YEAST	uniprot_sprot.fasta	14,536.5	100.0%	5	6	14	0.0275%	34.3%
Mitochondrial peroxiredoxin PRX1 OS=Saccharomyces cerevisiae (strain ATCC 204508 / S288c) GN=PRX1 PE=1 SV=1	P34227|PRX1_YEAST	uniprot_sprot.fasta	29,496.7	100.0%	5	5	14	0.0275%	21.8%
ATP-dependent RNA helicase SUB2 OS=Saccharomyces cerevisiae (strain YJM789) GN=SUB2 PE=3 SV=1	A6ZXP4|SUB2_YEAS7,Q07478|SUB2_YEAST	uniprot_sprot.fasta	50,280.1	100.0%	4	4	14	0.0275%	10.8%
Isoleucine--tRNA ligase, cytoplasmic OS=Saccharomyces cerevisiae (strain ATCC 204508 / S288c) GN=ILS1 PE=1 SV=1	P09436|SYIC_YEAST	uniprot_sprot.fasta	122,988.3	100.0%	13	13	16	0.0278%	14.7%
V-type proton ATPase subunit B OS=Saccharomyces cerevisiae (strain ATCC 204508 / S288c) GN=VMA2 PE=1 SV=2	P16140|VATB_YEAST	uniprot_sprot.fasta	57,751.6	100.0%	10	11	16	0.0278%	27.7%
Ornithine aminotransferase OS=Saccharomyces cerevisiae (strain ATCC 204508 / S288c) GN=CAR2 PE=1 SV=2	P07991|OAT_YEAST	uniprot_sprot.fasta	46,087.0	100.0%	8	9	16	0.0278%	24.8%
Mitochondrial outer membrane protein porin 1 OS=Saccharomyces cerevisiae (strain ATCC 204508 / S288c) GN=POR1 PE=1 SV=4	P04840|VDAC1_YEAST	uniprot_sprot.fasta	30,429.5	100.0%	7	8	16	0.0278%	27.2%
Pyruvate dehydrogenase E1 component subunit beta, mitochondrial OS=Saccharomyces cerevisiae (strain ATCC 204508 / S288c) GN=PDB1 PE=1 SV=2	P32473|ODPB_YEAST	uniprot_sprot.fasta	40,054.2	100.0%	7	7	16	0.0278%	22.4%
Cys-Gly metallodipeptidase DUG1 OS=Saccharomyces cerevisiae (strain ATCC 204508 / S288c) GN=DUG1 PE=1 SV=1	P43616|DUG1_YEAST	uniprot_sprot.fasta	52,873.2	100.0%	6	6	16	0.0278%	17.5%
Succinate dehydrogenase [ubiquinone] flavoprotein subunit, mitochondrial OS=Saccharomyces cerevisiae (strain ATCC 204508 / S288c) GN=SDH1 PE=1 SV=1	Q00711|DHSA_YEAST	uniprot_sprot.fasta	70,230.1	100.0%	6	6	16	0.0278%	10.8%
Hexokinase-1 OS=Saccharomyces cerevisiae (strain ATCC 204508 / S288c) GN=HXK1 PE=1 SV=2	P04806|HXKA_YEAST	uniprot_sprot.fasta	53,740.7	100.0%	3	5	16	0.0278%	10.9%
Acetyl-CoA carboxylase OS=Saccharomyces cerevisiae (strain ATCC 204508 / S288c) GN=ACC1 PE=1 SV=2	Q00955|ACAC_YEAST	uniprot_sprot.fasta	250,359.5	100.0%	12	12	16	0.0286%	6.90%
5-methyltetrahydropteroyltriglutamate--homocysteine methyltransferase OS=Saccharomyces cerevisiae (strain ATCC 204508 / S288c) GN=MET6 PE=1 SV=4	P05694|METE_YEAST	uniprot_sprot.fasta	85,862.4	100.0%	9	10	16	0.0286%	15.0%
Glucokinase-1 OS=Saccharomyces cerevisiae (strain ATCC 204508 / S288c) GN=GLK1 PE=1 SV=1	P17709|HXKG_YEAST	uniprot_sprot.fasta	55,379.1	100.0%	8	8	16	0.0286%	22.6%
Glycine--tRNA ligase 1, mitochondrial OS=Saccharomyces cerevisiae (strain ATCC 204508 / S288c) GN=GRS1 PE=1 SV=3	P38088|SYG_YEAST	uniprot_sprot.fasta	78,186.6	100.0%	6	8	16	0.0286%	12.6%
Threonine--tRNA ligase, cytoplasmic OS=Saccharomyces cerevisiae (strain ATCC 204508 / S288c) GN=THS1 PE=1 SV=2	P04801|SYTC_YEAST	uniprot_sprot.fasta	84,522.6	100.0%	7	7	16	0.0286%	10.6%
Protein BMH1 OS=Saccharomyces cerevisiae (strain ATCC 204508 / S288c) GN=BMH1 PE=1 SV=4	P29311|BMH1_YEAST	uniprot_sprot.fasta	30,092.0	100.0%	5	5	16	0.0286%	24.7%
NADP-specific glutamate dehydrogenase 1 OS=Saccharomyces cerevisiae (strain ATCC 204508 / S288c) GN=GDH1 PE=1 SV=2	P07262|DHE4_YEAST	uniprot_sprot.fasta	49,570.2	100.0%	10	11	15	0.0294%	31.1%
Pyruvate carboxylase 1 OS=Saccharomyces cerevisiae (strain ATCC 204508 / S288c) GN=PYC1 PE=1 SV=2	P11154|PYC1_YEAST	uniprot_sprot.fasta	130,101.6	100.0%	11	11	15	0.0294%	9.93%
Thioredoxin reductase 1 OS=Saccharomyces cerevisiae (strain ATCC 204508 / S288c) GN=TRR1 PE=1 SV=3	P29509|TRXB1_YEAST	uniprot_sprot.fasta	34,239.2	100.0%	8	10	15	0.0294%	37.9%
ATP-dependent RNA helicase DED1 OS=Saccharomyces cerevisiae (strain YJM789) GN=DED1 PE=3 SV=1	A6ZP47|DED1_YEAS7,P06634|DED1_YEAST	uniprot_sprot.fasta	65,554.5	100.0%	8	8	15	0.0294%	16.4%
Hydroxymethylglutaryl-CoA synthase OS=Saccharomyces cerevisiae (strain ATCC 204508 / S288c) GN=ERG13 PE=1 SV=1	P54839|HMCS_YEAST	uniprot_sprot.fasta	55,015.2	100.0%	6	6	15	0.0294%	15.1%
Histone H4 OS=Saccharomyces cerevisiae (strain ATCC 204508 / S288c) GN=HHF1 PE=1 SV=2	P02309|H4_YEAST	uniprot_sprot.fasta	11,368.9	100.0%	3	5	15	0.0294%	24.3%
40S ribosomal protein S5 OS=Saccharomyces cerevisiae (strain ATCC 204508 / S288c) GN=RPS5 PE=1 SV=3	P26783|RS5_YEAST	uniprot_sprot.fasta	25,038.5	100.0%	4	4	15	0.0294%	16.0%
NADP-specific glutamate dehydrogenase 1 OS=Saccharomyces cerevisiae (strain ATCC 204508 / S288c) GN=GDH1 PE=1 SV=2	P07262|DHE4_YEAST	uniprot_sprot.fasta	49,570.2	100.0%	10	10	17	0.0295%	32.4%
Bifunctional purine biosynthetic protein ADE5,7 OS=Saccharomyces cerevisiae (strain ATCC 204508 / S288c) GN=ADE5,7 PE=1 SV=1	P07244|PUR2_YEAST	uniprot_sprot.fasta	86,068.6	100.0%	9	9	17	0.0295%	15.3%
Uncharacterized oxidoreductase YMR226C OS=Saccharomyces cerevisiae (strain ATCC 204508 / S288c) GN=YMR226C PE=1 SV=1	Q05016|YM71_YEAST	uniprot_sprot.fasta	29,159.7	100.0%	6	8	17	0.0295%	24.0%
6-phosphofructo-2-kinase 1 OS=Saccharomyces cerevisiae (strain ATCC 204508 / S288c) GN=PFK26 PE=1 SV=1	P40433|6P21_YEAST	uniprot_sprot.fasta	93,421.4	100.0%	7	7	17	0.0295%	11.6%
ATP-dependent RNA helicase SUB2 OS=Saccharomyces cerevisiae (strain YJM789) GN=SUB2 PE=3 SV=1	A6ZXP4|SUB2_YEAS7,Q07478|SUB2_YEAST	uniprot_sprot.fasta	50,280.1	100.0%	5	5	17	0.0295%	15.7%
Fumarate hydratase, mitochondrial OS=Saccharomyces cerevisiae (strain ATCC 204508 / S288c) GN=FUM1 PE=1 SV=2	P08417|FUMH_YEAST	uniprot_sprot.fasta	53,152.6	100.0%	4	4	17	0.0295%	9.84%
Cytochrome b-c1 complex subunit 1, mitochondrial OS=Saccharomyces cerevisiae (strain ATCC 204508 / S288c) GN=COR1 PE=1 SV=1	P07256|QCR1_YEAST	uniprot_sprot.fasta	50,229.0	100.0%	9	11	17	0.0304%	25.2%
Valine--tRNA ligase, mitochondrial OS=Saccharomyces cerevisiae (strain ATCC 204508 / S288c) GN=VAS1 PE=1 SV=2	P07806|SYV_YEAST	uniprot_sprot.fasta	125,774.7	100.0%	10	10	17	0.0304%	10.6%
Dihydroxy-acid dehydratase, mitochondrial OS=Saccharomyces cerevisiae (strain ATCC 204508 / S288c) GN=ILV3 PE=1 SV=2	P39522|ILV3_YEAST	uniprot_sprot.fasta	62,862.8	100.0%	7	7	17	0.0304%	17.6%
Uncharacterized GTP-binding protein OLA1 OS=Saccharomyces cerevisiae (strain ATCC 204508 / S288c) GN=OLA1 PE=1 SV=1	P38219|OLA1_YEAST	uniprot_sprot.fasta	44,175.9	100.0%	6	6	17	0.0304%	19.3%
40S ribosomal protein S5 OS=Saccharomyces cerevisiae (strain ATCC 204508 / S288c) GN=RPS5 PE=1 SV=3	P26783|RS5_YEAST	uniprot_sprot.fasta	25,038.5	100.0%	5	5	17	0.0304%	21.8%
Eukaryotic translation initiation factor 5A-1 OS=Saccharomyces cerevisiae (strain ATCC 204508 / S288c) GN=HYP2 PE=1 SV=3	P23301|IF5A1_YEAST	uniprot_sprot.fasta	17,114.6	100.0%	3	5	17	0.0304%	19.1%
Ubiquitin-like protein SMT3 OS=Saccharomyces cerevisiae (strain ATCC 204508 / S288c) GN=SMT3 PE=1 SV=1	Q12306|SMT3_YEAST	uniprot_sprot.fasta	11,597.5	100.0%	3	3	17	0.0304%	39.6%
Glucose-6-phosphate isomerase OS=Saccharomyces cerevisiae (strain ATCC 204508 / S288c) GN=PGI1 PE=1 SV=3	P12709|G6PI_YEAST	uniprot_sprot.fasta	61,300.4	100.0%	10	14	18	0.0312%	21.8%
Hexokinase-2 OS=Saccharomyces cerevisiae (strain ATCC 204508 / S288c) GN=HXK2 PE=1 SV=4	P04807|HXKB_YEAST	uniprot_sprot.fasta	53,944.7	100.0%	9	10	18	0.0312%	26.1%
Cystathionine beta-synthase OS=Saccharomyces cerevisiae (strain ATCC 204508 / S288c) GN=CYS4 PE=1 SV=1	P32582|CBS_YEAST	uniprot_sprot.fasta	56,024.8	100.0%	9	9	18	0.0312%	21.3%
Alanine--tRNA ligase, mitochondrial OS=Saccharomyces cerevisiae (strain ATCC 204508 / S288c) GN=ALA1 PE=1 SV=3	P40825|SYA_YEAST	uniprot_sprot.fasta	110,064.2	100.0%	7	7	18	0.0312%	9.26%
Histone H4 OS=Saccharomyces cerevisiae (strain ATCC 204508 / S288c) GN=HHF1 PE=1 SV=2	P02309|H4_YEAST	uniprot_sprot.fasta	11,368.9	100.0%	4	6	18	0.0312%	32.0%
Isoleucine--tRNA ligase, cytoplasmic OS=Saccharomyces cerevisiae (strain ATCC 204508 / S288c) GN=ILS1 PE=1 SV=1	P09436|SYIC_YEAST	uniprot_sprot.fasta	122,988.3	100.0%	15	16	16	0.0314%	14.6%
Acetyl-CoA carboxylase OS=Saccharomyces cerevisiae (strain ATCC 204508 / S288c) GN=ACC1 PE=1 SV=2	Q00955|ACAC_YEAST	uniprot_sprot.fasta	250,359.5	100.0%	13	14	16	0.0314%	7.66%
DNA-directed RNA polymerase II subunit RPB1 OS=Saccharomyces cerevisiae (strain ATCC 204508 / S288c) GN=RPO21 PE=1 SV=2	P04050|RPB1_YEAST	uniprot_sprot.fasta	191,615.1	100.0%	13	13	16	0.0314%	9.06%
Peptidyl-prolyl cis-trans isomerase OS=Saccharomyces cerevisiae (strain ATCC 204508 / S288c) GN=CPR1 PE=1 SV=3	P14832|CYPH_YEAST	uniprot_sprot.fasta	17,390.7	100.0%	5	9	16	0.0314%	36.4%
Guanine nucleotide-binding protein subunit beta-like protein OS=Saccharomyces cerevisiae (strain ATCC 204508 / S288c) GN=ASC1 PE=1 SV=4	P38011|GBLP_YEAST	uniprot_sprot.fasta	34,805.9	100.0%	9	9	16	0.0314%	25.7%
Bifunctional purine biosynthetic protein ADE5,7 OS=Saccharomyces cerevisiae (strain ATCC 204508 / S288c) GN=ADE5,7 PE=1 SV=1	P07244|PUR2_YEAST	uniprot_sprot.fasta	86,068.6	100.0%	8	8	16	0.0314%	15.6%
Uncharacterized oxidoreductase YMR226C OS=Saccharomyces cerevisiae (strain ATCC 204508 / S288c) GN=YMR226C PE=1 SV=1	Q05016|YM71_YEAST	uniprot_sprot.fasta	29,159.7	100.0%	5	7	16	0.0314%	19.5%
Branched-chain-amino-acid aminotransferase, mitochondrial OS=Saccharomyces cerevisiae (strain ATCC 204508 / S288c) GN=BAT1 PE=1 SV=1	P38891|BCA1_YEAST	uniprot_sprot.fasta	43,597.5	100.0%	7	7	16	0.0314%	18.8%
Ribonucleoside-diphosphate reductase small chain 2 OS=Saccharomyces cerevisiae (strain ATCC 204508 / S288c) GN=RNR4 PE=1 SV=1	P49723|RIR4_YEAST	uniprot_sprot.fasta	40,056.8	100.0%	7	7	16	0.0314%	26.4%
Acetyl-CoA acetyltransferase OS=Saccharomyces cerevisiae (strain ATCC 204508 / S288c) GN=ERG10 PE=1 SV=3	P41338|THIL_YEAST	uniprot_sprot.fasta	41,728.6	100.0%	7	7	16	0.0314%	19.8%
Transaldolase OS=Saccharomyces cerevisiae (strain ATCC 204508 / S288c) GN=TAL1 PE=1 SV=4	P15019|TAL1_YEAST	uniprot_sprot.fasta	37,037.6	100.0%	9	10	18	0.0322%	32.5%
Acetolactate synthase catalytic subunit, mitochondrial OS=Saccharomyces cerevisiae (strain ATCC 204508 / S288c) GN=ILV2 PE=1 SV=1	P07342|ILVB_YEAST	uniprot_sprot.fasta	74,937.5	100.0%	7	7	18	0.0322%	14.7%
Alanine--tRNA ligase, mitochondrial OS=Saccharomyces cerevisiae (strain ATCC 204508 / S288c) GN=ALA1 PE=1 SV=3	P40825|SYA_YEAST	uniprot_sprot.fasta	110,064.2	100.0%	6	6	18	0.0322%	7.93%
DNA-directed RNA polymerase II subunit RPB1 OS=Saccharomyces cerevisiae (strain ATCC 204508 / S288c) GN=RPO21 PE=1 SV=2	P04050|RPB1_YEAST	uniprot_sprot.fasta	191,615.1	100.0%	11	11	19	0.0330%	7.73%
Ketol-acid reductoisomerase, mitochondrial OS=Saccharomyces cerevisiae (strain ATCC 204508 / S288c) GN=ILV5 PE=1 SV=1	P06168|ILV5_YEAST	uniprot_sprot.fasta	44,369.9	100.0%	9	11	19	0.0330%	23.8%
Transaldolase OS=Saccharomyces cerevisiae (strain ATCC 204508 / S288c) GN=TAL1 PE=1 SV=4	P15019|TAL1_YEAST	uniprot_sprot.fasta	37,037.6	100.0%	8	10	17	0.0334%	28.4%
6-phosphofructokinase subunit alpha OS=Saccharomyces cerevisiae (strain ATCC 204508 / S288c) GN=PFK1 PE=1 SV=1	P16861|K6PF1_YEAST	uniprot_sprot.fasta	107,972.8	100.0%	9	10	17	0.0334%	11.4%
Pyruvate dehydrogenase E1 component subunit beta, mitochondrial OS=Saccharomyces cerevisiae (strain ATCC 204508 / S288c) GN=PDB1 PE=1 SV=2	P32473|ODPB_YEAST	uniprot_sprot.fasta	40,054.2	100.0%	7	7	17	0.0334%	19.1%
Glycogen phosphorylase OS=Saccharomyces cerevisiae (strain ATCC 204508 / S288c) GN=GPH1 PE=1 SV=4	P06738|PHSG_YEAST	uniprot_sprot.fasta	103,279.2	100.0%	12	13	19	0.0339%	17.7%
Ribonucleoside-diphosphate reductase small chain 2 OS=Saccharomyces cerevisiae (strain ATCC 204508 / S288c) GN=RNR4 PE=1 SV=1	P49723|RIR4_YEAST	uniprot_sprot.fasta	40,056.8	100.0%	8	10	19	0.0339%	26.4%
Tubulin beta chain OS=Saccharomyces cerevisiae (strain ATCC 204508 / S288c) GN=TUB2 PE=1 SV=2	P02557|TBB_YEAST	uniprot_sprot.fasta	50,922.6	100.0%	6	6	19	0.0339%	15.5%
Flavohemoprotein OS=Saccharomyces cerevisiae (strain ATCC 204508 / S288c) GN=YHB1 PE=1 SV=2	P39676|FHP_YEAST	uniprot_sprot.fasta	44,647.2	100.0%	5	6	19	0.0339%	19.0%
Heat shock protein SSA1 OS=Saccharomyces cerevisiae (strain ATCC 204508 / S288c) GN=SSA1 PE=1 SV=4	P10591|HSP71_YEAST	uniprot_sprot.fasta	69,659.4	100.0%	4	4	19	0.0339%	34.7%
Leucine--tRNA ligase, cytoplasmic OS=Saccharomyces cerevisiae (strain ATCC 204508 / S288c) GN=CDC60 PE=1 SV=1	P26637|SYLC_YEAST	uniprot_sprot.fasta	124,147.3	100.0%	11	12	20	0.0347%	11.2%
40S ribosomal protein S0-B OS=Saccharomyces cerevisiae (strain YJM789) GN=RPS0B PE=3 SV=1	A7A0V3|RSSA2_YEAS7,B3LT19|RSSA2_YEAS1,P46654|RSSA2_YEAST	uniprot_sprot.fasta	27,962.3	100.0%	7	8	20	0.0347%	38.1%
Acetolactate synthase catalytic subunit, mitochondrial OS=Saccharomyces cerevisiae (strain ATCC 204508 / S288c) GN=ILV2 PE=1 SV=1	P07342|ILVB_YEAST	uniprot_sprot.fasta	74,937.5	100.0%	6	6	20	0.0347%	10.8%
Alcohol dehydrogenase 3, mitochondrial OS=Saccharomyces cerevisiae (strain ATCC 204508 / S288c) GN=ADH3 PE=1 SV=2	P07246|ADH3_YEAST	uniprot_sprot.fasta	40,369.8	100.0%	5	5	20	0.0347%	10.7%
Aspartate--tRNA ligase, cytoplasmic OS=Saccharomyces cerevisiae (strain ATCC 204508 / S288c) GN=DPS1 PE=1 SV=3	P04802|SYDC_YEAST	uniprot_sprot.fasta	63,517.8	100.0%	11	11	18	0.0353%	23.2%
60S ribosomal protein L23-A OS=Saccharomyces cerevisiae (strain ATCC 204508 / S288c) GN=RPL23A PE=1 SV=1	P0CX41|RL23A_YEAST,P0CX42|RL23B_YEAST	uniprot_sprot.fasta	14,473.1	100.0%	5	7	18	0.0353%	23.4%
Proliferating cell nuclear antigen OS=Saccharomyces cerevisiae (strain ATCC 204508 / S288c) GN=POL30 PE=1 SV=1	P15873|PCNA_YEAST	uniprot_sprot.fasta	28,918.1	100.0%	7	7	18	0.0353%	26.0%
Heat shock protein STI1 OS=Saccharomyces cerevisiae (strain ATCC 204508 / S288c) GN=STI1 PE=1 SV=1	P15705|STI1_YEAST	uniprot_sprot.fasta	66,267.6	100.0%	4	6	18	0.0353%	10.7%
(DL)-glycerol-3-phosphatase 1 OS=Saccharomyces cerevisiae (strain ATCC 204508 / S288c) GN=RHR2 PE=1 SV=3	P41277|GPP1_YEAST	uniprot_sprot.fasta	27,948.2	100.0%	8	9	20	0.0357%	30.8%
Histone H4 OS=Saccharomyces cerevisiae (strain ATCC 204508 / S288c) GN=HHF1 PE=1 SV=2	P02309|H4_YEAST	uniprot_sprot.fasta	11,368.9	100.0%	6	9	20	0.0357%	44.7%
40S ribosomal protein S0-B OS=Saccharomyces cerevisiae (strain YJM789) GN=RPS0B PE=3 SV=1	A7A0V3|RSSA2_YEAS7,B3LT19|RSSA2_YEAS1,P46654|RSSA2_YEAST	uniprot_sprot.fasta	27,962.3	100.0%	6	8	20	0.0357%	31.3%
Isocitrate dehydrogenase [NAD] subunit 1, mitochondrial OS=Saccharomyces cerevisiae (strain ATCC 204508 / S288c) GN=IDH1 PE=1 SV=2	P28834|IDH1_YEAST	uniprot_sprot.fasta	39,325.3	100.0%	8	8	20	0.0357%	22.8%
Guanine nucleotide-binding protein subunit beta-like protein OS=Saccharomyces cerevisiae (strain ATCC 204508 / S288c) GN=ASC1 PE=1 SV=4	P38011|GBLP_YEAST	uniprot_sprot.fasta	34,805.9	100.0%	7	8	20	0.0357%	22.9%
6-phosphofructokinase subunit alpha OS=Saccharomyces cerevisiae (strain ATCC 204508 / S288c) GN=PFK1 PE=1 SV=1	P16861|K6PF1_YEAST	uniprot_sprot.fasta	107,972.8	100.0%	9	11	21	0.0364%	13.2%
Ribosome-associated complex subunit SSZ1 OS=Saccharomyces cerevisiae (strain ATCC 204508 / S288c) GN=SSZ1 PE=1 SV=2	P38788|SSZ1_YEAST	uniprot_sprot.fasta	58,239.5	100.0%	9	10	21	0.0364%	21.7%
Asparagine synthetase [glutamine-hydrolyzing] 2 OS=Saccharomyces cerevisiae (strain ATCC 204508 / S288c) GN=ASN2 PE=1 SV=2	P49090|ASNS2_YEAST	uniprot_sprot.fasta	64,595.5	100.0%	9	9	21	0.0364%	15.4%
Dihydroxy-acid dehydratase, mitochondrial OS=Saccharomyces cerevisiae (strain ATCC 204508 / S288c) GN=ILV3 PE=1 SV=2	P39522|ILV3_YEAST	uniprot_sprot.fasta	62,862.8	100.0%	7	8	21	0.0364%	17.6%
Dihydroxy-acid dehydratase, mitochondrial OS=Saccharomyces cerevisiae (strain ATCC 204508 / S288c) GN=ILV3 PE=1 SV=2	P39522|ILV3_YEAST	uniprot_sprot.fasta	62,862.8	100.0%	7	8	19	0.0373%	17.6%
Fumarate hydratase, mitochondrial OS=Saccharomyces cerevisiae (strain ATCC 204508 / S288c) GN=FUM1 PE=1 SV=2	P08417|FUMH_YEAST	uniprot_sprot.fasta	53,152.6	100.0%	3	3	19	0.0373%	7.38%
Fatty acid synthase subunit beta OS=Saccharomyces cerevisiae (strain ATCC 204508 / S288c) GN=FAS1 PE=1 SV=2	P07149|FAS1_YEAST	uniprot_sprot.fasta	228,696.0	100.0%	14	15	21	0.0375%	9.51%
Elongation factor 1-gamma 2 OS=Saccharomyces cerevisiae (strain ATCC 204508 / S288c) GN=TEF4 PE=1 SV=1	P36008|EF1G2_YEAST	uniprot_sprot.fasta	46,521.9	100.0%	6	6	21	0.0375%	14.3%
Acetyl-CoA carboxylase OS=Saccharomyces cerevisiae (strain ATCC 204508 / S288c) GN=ACC1 PE=1 SV=2	Q00955|ACAC_YEAST	uniprot_sprot.fasta	250,359.5	100.0%	12	13	22	0.0382%	7.08%
Glyceraldehyde-3-phosphate dehydrogenase 1 OS=Saccharomyces cerevisiae (strain ATCC 204508 / S288c) GN=TDH1 PE=1 SV=3	P00360|G3P1_YEAST	uniprot_sprot.fasta	35,750.2	100.0%	8	10	22	0.0382%	41.9%
Tubulin beta chain OS=Saccharomyces cerevisiae (strain ATCC 204508 / S288c) GN=TUB2 PE=1 SV=2	P02557|TBB_YEAST	uniprot_sprot.fasta	50,922.6	100.0%	8	9	22	0.0382%	18.6%
Mitochondrial phosphate carrier protein OS=Saccharomyces cerevisiae (strain ATCC 204508 / S288c) GN=MIR1 PE=1 SV=1	P23641|MPCP_YEAST	uniprot_sprot.fasta	32,813.9	100.0%	8	8	22	0.0382%	24.4%
(DL)-glycerol-3-phosphatase 1 OS=Saccharomyces cerevisiae (strain ATCC 204508 / S288c) GN=RHR2 PE=1 SV=3	P41277|GPP1_YEAST	uniprot_sprot.fasta	27,948.2	100.0%	6	7	22	0.0382%	28.4%
Enolase 1 OS=Saccharomyces cerevisiae (strain ATCC 204508 / S288c) GN=ENO1 PE=1 SV=3	P00924|ENO1_YEAST	uniprot_sprot.fasta	46,817.4	100.0%	4	6	22	0.0382%	31.6%
Isocitrate dehydrogenase [NAD] subunit 1, mitochondrial OS=Saccharomyces cerevisiae (strain ATCC 204508 / S288c) GN=IDH1 PE=1 SV=2	P28834|IDH1_YEAST	uniprot_sprot.fasta	39,325.3	100.0%	6	6	22	0.0382%	18.1%
S-adenosylmethionine synthase 1 OS=Saccharomyces cerevisiae (strain ATCC 204508 / S288c) GN=SAM1 PE=1 SV=2	P10659|METK1_YEAST	uniprot_sprot.fasta	41,819.4	100.0%	6	6	22	0.0382%	17.3%
Flavohemoprotein OS=Saccharomyces cerevisiae (strain ATCC 204508 / S288c) GN=YHB1 PE=1 SV=2	P39676|FHP_YEAST	uniprot_sprot.fasta	44,647.2	100.0%	4	5	22	0.0382%	12.5%
Cell division control protein 48 OS=Saccharomyces cerevisiae (strain ATCC 204508 / S288c) GN=CDC48 PE=1 SV=3	P25694|CDC48_YEAST	uniprot_sprot.fasta	91,998.4	100.0%	12	13	20	0.0392%	17.4%
Hexokinase-1 OS=Saccharomyces cerevisiae (strain ATCC 204508 / S288c) GN=HXK1 PE=1 SV=2	P04806|HXKA_YEAST	uniprot_sprot.fasta	53,740.7	100.0%	7	9	20	0.0392%	22.5%
Pyruvate carboxylase 1 OS=Saccharomyces cerevisiae (strain ATCC 204508 / S288c) GN=PYC1 PE=1 SV=2	P11154|PYC1_YEAST	uniprot_sprot.fasta	130,101.6	100.0%	15	15	22	0.0393%	14.8%
V-type proton ATPase subunit B OS=Saccharomyces cerevisiae (strain ATCC 204508 / S288c) GN=VMA2 PE=1 SV=2	P16140|VATB_YEAST	uniprot_sprot.fasta	57,751.6	100.0%	12	13	22	0.0393%	30.2%
40S ribosomal protein S3 OS=Saccharomyces cerevisiae (strain ATCC 204508 / S288c) GN=RPS3 PE=1 SV=5	P05750|RS3_YEAST	uniprot_sprot.fasta	26,503.0	100.0%	10	11	22	0.0393%	41.7%
Hexokinase-1 OS=Saccharomyces cerevisiae (strain ATCC 204508 / S288c) GN=HXK1 PE=1 SV=2	P04806|HXKA_YEAST	uniprot_sprot.fasta	53,740.7	100.0%	8	10	22	0.0393%	24.3%
Cystathionine beta-synthase OS=Saccharomyces cerevisiae (strain ATCC 204508 / S288c) GN=CYS4 PE=1 SV=1	P32582|CBS_YEAST	uniprot_sprot.fasta	56,024.8	100.0%	10	10	22	0.0393%	25.8%
Serine hydroxymethyltransferase, cytosolic OS=Saccharomyces cerevisiae (strain ATCC 204508 / S288c) GN=SHM2 PE=1 SV=2	P37291|GLYC_YEAST	uniprot_sprot.fasta	52,219.7	100.0%	7	8	22	0.0393%	21.1%
Isoleucine--tRNA ligase, cytoplasmic OS=Saccharomyces cerevisiae (strain ATCC 204508 / S288c) GN=ILS1 PE=1 SV=1	P09436|SYIC_YEAST	uniprot_sprot.fasta	122,988.3	100.0%	15	15	23	0.0411%	16.4%
Asparagine--tRNA ligase, cytoplasmic OS=Saccharomyces cerevisiae (strain ATCC 204508 / S288c) GN=DED81 PE=1 SV=1	P38707|SYNC_YEAST	uniprot_sprot.fasta	62,208.6	100.0%	8	9	23	0.0411%	15.9%
Mitochondrial phosphate carrier protein OS=Saccharomyces cerevisiae (strain ATCC 204508 / S288c) GN=MIR1 PE=1 SV=1	P23641|MPCP_YEAST	uniprot_sprot.fasta	32,813.9	100.0%	9	9	23	0.0411%	31.2%
Glycine--tRNA ligase 1, mitochondrial OS=Saccharomyces cerevisiae (strain ATCC 204508 / S288c) GN=GRS1 PE=1 SV=3	P38088|SYG_YEAST	uniprot_sprot.fasta	78,186.6	100.0%	10	11	21	0.0412%	18.0%
Acetolactate synthase catalytic subunit, mitochondrial OS=Saccharomyces cerevisiae (strain ATCC 204508 / S288c) GN=ILV2 PE=1 SV=1	P07342|ILVB_YEAST	uniprot_sprot.fasta	74,937.5	100.0%	9	10	21	0.0412%	19.4%
Uncharacterized GTP-binding protein OLA1 OS=Saccharomyces cerevisiae (strain ATCC 204508 / S288c) GN=OLA1 PE=1 SV=1	P38219|OLA1_YEAST	uniprot_sprot.fasta	44,175.9	100.0%	7	7	21	0.0412%	23.1%
S-adenosylmethionine synthase 1 OS=Saccharomyces cerevisiae (strain ATCC 204508 / S288c) GN=SAM1 PE=1 SV=2	P10659|METK1_YEAST	uniprot_sprot.fasta	41,819.4	100.0%	6	6	21	0.0412%	17.3%
Acetyl-CoA hydrolase OS=Saccharomyces cerevisiae (strain ATCC 204508 / S288c) GN=ACH1 PE=1 SV=2	P32316|ACH1_YEAST	uniprot_sprot.fasta	58,713.1	100.0%	8	8	24	0.0417%	19.8%
Elongation factor 1-gamma 2 OS=Saccharomyces cerevisiae (strain ATCC 204508 / S288c) GN=TEF4 PE=1 SV=1	P36008|EF1G2_YEAST	uniprot_sprot.fasta	46,521.9	100.0%	7	8	24	0.0417%	14.6%
Heat shock protein SSA1 OS=Saccharomyces cerevisiae (strain ATCC 204508 / S288c) GN=SSA1 PE=1 SV=4	P10591|HSP71_YEAST	uniprot_sprot.fasta	69,659.4	100.0%	5	5	24	0.0417%	39.1%
Arginine--tRNA ligase, cytoplasmic OS=Saccharomyces cerevisiae (strain ATCC 204508 / S288c) GN=YDR341C PE=1 SV=1	Q05506|SYRC_YEAST	uniprot_sprot.fasta	69,527.8	100.0%	13	13	24	0.0429%	23.6%
Cytochrome b-c1 complex subunit 1, mitochondrial OS=Saccharomyces cerevisiae (strain ATCC 204508 / S288c) GN=COR1 PE=1 SV=1	P07256|QCR1_YEAST	uniprot_sprot.fasta	50,229.0	100.0%	12	15	22	0.0432%	30.0%
Fatty acid synthase subunit alpha OS=Saccharomyces cerevisiae (strain ATCC 204508 / S288c) GN=FAS2 PE=1 SV=2	P19097|FAS2_YEAST	uniprot_sprot.fasta	206,951.1	100.0%	14	14	22	0.0432%	9.70%
Leucine--tRNA ligase, cytoplasmic OS=Saccharomyces cerevisiae (strain ATCC 204508 / S288c) GN=CDC60 PE=1 SV=1	P26637|SYLC_YEAST	uniprot_sprot.fasta	124,147.3	100.0%	12	13	22	0.0432%	11.2%
Asparagine synthetase [glutamine-hydrolyzing] 2 OS=Saccharomyces cerevisiae (strain ATCC 204508 / S288c) GN=ASN2 PE=1 SV=2	P49090|ASNS2_YEAST	uniprot_sprot.fasta	64,595.5	100.0%	10	11	22	0.0432%	14.9%
Cystathionine beta-synthase OS=Saccharomyces cerevisiae (strain ATCC 204508 / S288c) GN=CYS4 PE=1 SV=1	P32582|CBS_YEAST	uniprot_sprot.fasta	56,024.8	100.0%	10	10	22	0.0432%	23.1%
Alanine--tRNA ligase, mitochondrial OS=Saccharomyces cerevisiae (strain ATCC 204508 / S288c) GN=ALA1 PE=1 SV=3	P40825|SYA_YEAST	uniprot_sprot.fasta	110,064.2	100.0%	9	9	22	0.0432%	11.5%
Isocitrate dehydrogenase [NAD] subunit 1, mitochondrial OS=Saccharomyces cerevisiae (strain ATCC 204508 / S288c) GN=IDH1 PE=1 SV=2	P28834|IDH1_YEAST	uniprot_sprot.fasta	39,325.3	100.0%	7	7	22	0.0432%	23.9%
Cell division control protein 48 OS=Saccharomyces cerevisiae (strain ATCC 204508 / S288c) GN=CDC48 PE=1 SV=3	P25694|CDC48_YEAST	uniprot_sprot.fasta	91,998.4	100.0%	13	15	25	0.0447%	18.6%
Transketolase 1 OS=Saccharomyces cerevisiae (strain ATCC 204508 / S288c) GN=TKL1 PE=1 SV=4	P23254|TKT1_YEAST	uniprot_sprot.fasta	73,807.9	100.0%	10	12	25	0.0447%	19.4%
Inorganic pyrophosphatase OS=Saccharomyces cerevisiae (strain ATCC 204508 / S288c) GN=IPP1 PE=1 SV=4	P00817|IPYR_YEAST	uniprot_sprot.fasta	32,301.1	100.0%	11	14	26	0.0451%	42.5%
Transketolase 1 OS=Saccharomyces cerevisiae (strain ATCC 204508 / S288c) GN=TKL1 PE=1 SV=4	P23254|TKT1_YEAST	uniprot_sprot.fasta	73,807.9	100.0%	11	12	26	0.0451%	15.7%
Heat shock protein homolog SSE1 OS=Saccharomyces cerevisiae (strain ATCC 204508 / S288c) GN=SSE1 PE=1 SV=4	P32589|HSP7F_YEAST	uniprot_sprot.fasta	77,368.6	100.0%	9	11	26	0.0451%	18.3%
Actin OS=Saccharomyces cerevisiae (strain ATCC 204508 / S288c) GN=ACT1 PE=1 SV=1	P60010|ACT_YEAST	uniprot_sprot.fasta	41,690.4	100.0%	8	10	26	0.0451%	30.9%
Alcohol dehydrogenase 2 OS=Saccharomyces cerevisiae (strain ATCC 204508 / S288c) GN=ADH2 PE=1 SV=3	P00331|ADH2_YEAST	uniprot_sprot.fasta	36,731.8	100.0%	5	6	26	0.0451%	26.7%
40S ribosomal protein S3 OS=Saccharomyces cerevisiae (strain ATCC 204508 / S288c) GN=RPS3 PE=1 SV=5	P05750|RS3_YEAST	uniprot_sprot.fasta	26,503.0	100.0%	11	13	23	0.0451%	42.9%
Aromatic/aminoadipate aminotransferase 1 OS=Saccharomyces cerevisiae (strain ATCC 204508 / S288c) GN=ARO8 PE=1 SV=1	P53090|ARO8_YEAST	uniprot_sprot.fasta	56,180.5	100.0%	10	10	23	0.0451%	23.8%
Asparagine--tRNA ligase, cytoplasmic OS=Saccharomyces cerevisiae (strain ATCC 204508 / S288c) GN=DED81 PE=1 SV=1	P38707|SYNC_YEAST	uniprot_sprot.fasta	62,208.6	100.0%	8	9	23	0.0451%	17.1%
40S ribosomal protein S0-B OS=Saccharomyces cerevisiae (strain YJM789) GN=RPS0B PE=3 SV=1	A7A0V3|RSSA2_YEAS7,B3LT19|RSSA2_YEAS1,P46654|RSSA2_YEAST	uniprot_sprot.fasta	27,962.3	100.0%	7	8	23	0.0451%	38.1%
Leucine--tRNA ligase, cytoplasmic OS=Saccharomyces cerevisiae (strain ATCC 204508 / S288c) GN=CDC60 PE=1 SV=1	P26637|SYLC_YEAST	uniprot_sprot.fasta	124,147.3	100.0%	14	14	26	0.0464%	15.0%
Malate synthase 1, glyoxysomal OS=Saccharomyces cerevisiae (strain ATCC 204508 / S288c) GN=MLS1 PE=1 SV=1	P30952|MASY_YEAST	uniprot_sprot.fasta	62,793.2	100.0%	6	7	26	0.0464%	13.0%
Phosphoglycerate mutase 1 OS=Saccharomyces cerevisiae (strain ATCC 204508 / S288c) GN=GPM1 PE=1 SV=3	P00950|PMG1_YEAST	uniprot_sprot.fasta	27,609.7	100.0%	11	15	27	0.0469%	31.2%
40S ribosomal protein S3 OS=Saccharomyces cerevisiae (strain ATCC 204508 / S288c) GN=RPS3 PE=1 SV=5	P05750|RS3_YEAST	uniprot_sprot.fasta	26,503.0	100.0%	10	11	27	0.0469%	42.9%
Fatty acid synthase subunit beta OS=Saccharomyces cerevisiae (strain ATCC 204508 / S288c) GN=FAS1 PE=1 SV=2	P07149|FAS1_YEAST	uniprot_sprot.fasta	228,696.0	100.0%	17	18	24	0.0471%	11.7%
60S acidic ribosomal protein P0 OS=Saccharomyces cerevisiae (strain ATCC 204508 / S288c) GN=RPP0 PE=1 SV=2	P05317|RLA0_YEAST	uniprot_sprot.fasta	33,717.4	100.0%	8	8	24	0.0471%	26.9%
Heat shock protein SSA1 OS=Saccharomyces cerevisiae (strain ATCC 204508 / S288c) GN=SSA1 PE=1 SV=4	P10591|HSP71_YEAST	uniprot_sprot.fasta	69,659.4	100.0%	6	7	24	0.0471%	42.8%
Hexokinase-2 OS=Saccharomyces cerevisiae (strain ATCC 204508 / S288c) GN=HXK2 PE=1 SV=4	P04807|HXKB_YEAST	uniprot_sprot.fasta	53,944.7	100.0%	10	15	27	0.0482%	29.8%
6-phosphofructokinase subunit alpha OS=Saccharomyces cerevisiae (strain ATCC 204508 / S288c) GN=PFK1 PE=1 SV=1	P16861|K6PF1_YEAST	uniprot_sprot.fasta	107,972.8	100.0%	12	14	27	0.0482%	17.5%
Acetyl-CoA hydrolase OS=Saccharomyces cerevisiae (strain ATCC 204508 / S288c) GN=ACH1 PE=1 SV=2	P32316|ACH1_YEAST	uniprot_sprot.fasta	58,713.1	100.0%	10	11	27	0.0482%	22.2%
V-type proton ATPase subunit B OS=Saccharomyces cerevisiae (strain ATCC 204508 / S288c) GN=VMA2 PE=1 SV=2	P16140|VATB_YEAST	uniprot_sprot.fasta	57,751.6	100.0%	15	17	25	0.0491%	42.6%
(DL)-glycerol-3-phosphatase 1 OS=Saccharomyces cerevisiae (strain ATCC 204508 / S288c) GN=RHR2 PE=1 SV=3	P41277|GPP1_YEAST	uniprot_sprot.fasta	27,948.2	100.0%	8	10	25	0.0491%	31.2%
Alcohol dehydrogenase 2 OS=Saccharomyces cerevisiae (strain ATCC 204508 / S288c) GN=ADH2 PE=1 SV=3	P00331|ADH2_YEAST	uniprot_sprot.fasta	36,731.8	100.0%	5	5	25	0.0491%	26.7%
Heat shock protein 26 OS=Saccharomyces cerevisiae (strain ATCC 204508 / S288c) GN=HSP26 PE=1 SV=3	P15992|HSP26_YEAST	uniprot_sprot.fasta	23,880.2	100.0%	10	12	28	0.0500%	45.3%
Polyadenylate-binding protein, cytoplasmic and nuclear OS=Saccharomyces cerevisiae (strain ATCC 204508 / S288c) GN=PAB1 PE=1 SV=4	P04147|PABP_YEAST	uniprot_sprot.fasta	64,345.4	100.0%	8	8	28	0.0500%	19.1%
S-adenosylmethionine synthase 1 OS=Saccharomyces cerevisiae (strain ATCC 204508 / S288c) GN=SAM1 PE=1 SV=2	P10659|METK1_YEAST	uniprot_sprot.fasta	41,819.4	100.0%	8	8	28	0.0500%	31.9%
Pyruvate carboxylase 1 OS=Saccharomyces cerevisiae (strain ATCC 204508 / S288c) GN=PYC1 PE=1 SV=2	P11154|PYC1_YEAST	uniprot_sprot.fasta	130,101.6	100.0%	15	15	29	0.0503%	15.0%
Peroxiredoxin TSA1 OS=Saccharomyces cerevisiae (strain ATCC 204508 / S288c) GN=TSA1 PE=1 SV=3	P34760|TSA1_YEAST	uniprot_sprot.fasta	21,590.1	100.0%	3	4	29	0.0503%	14.8%
Arginine--tRNA ligase, cytoplasmic OS=Saccharomyces cerevisiae (strain ATCC 204508 / S288c) GN=YDR341C PE=1 SV=1	Q05506|SYRC_YEAST	uniprot_sprot.fasta	69,527.8	100.0%	15	15	26	0.0510%	28.5%
Tubulin beta chain OS=Saccharomyces cerevisiae (strain ATCC 204508 / S288c) GN=TUB2 PE=1 SV=2	P02557|TBB_YEAST	uniprot_sprot.fasta	50,922.6	100.0%	9	11	26	0.0510%	19.9%
Flavohemoprotein OS=Saccharomyces cerevisiae (strain ATCC 204508 / S288c) GN=YHB1 PE=1 SV=2	P39676|FHP_YEAST	uniprot_sprot.fasta	44,647.2	100.0%	5	7	26	0.0510%	16.3%
Ribosome-associated complex subunit SSZ1 OS=Saccharomyces cerevisiae (strain ATCC 204508 / S288c) GN=SSZ1 PE=1 SV=2	P38788|SSZ1_YEAST	uniprot_sprot.fasta	58,239.5	100.0%	10	11	29	0.0518%	23.0%
Aromatic/aminoadipate aminotransferase 1 OS=Saccharomyces cerevisiae (strain ATCC 204508 / S288c) GN=ARO8 PE=1 SV=1	P53090|ARO8_YEAST	uniprot_sprot.fasta	56,180.5	100.0%	7	7	29	0.0518%	19.0%
Cell division control protein 48 OS=Saccharomyces cerevisiae (strain ATCC 204508 / S288c) GN=CDC48 PE=1 SV=3	P25694|CDC48_YEAST	uniprot_sprot.fasta	91,998.4	100.0%	15	17	30	0.0521%	18.3%
Malate synthase 1, glyoxysomal OS=Saccharomyces cerevisiae (strain ATCC 204508 / S288c) GN=MLS1 PE=1 SV=1	P30952|MASY_YEAST	uniprot_sprot.fasta	62,793.2	100.0%	9	11	30	0.0521%	18.2%
Cytochrome b-c1 complex subunit 2, mitochondrial OS=Saccharomyces cerevisiae (strain ATCC 204508 / S288c) GN=QCR2 PE=1 SV=1	P07257|QCR2_YEAST	uniprot_sprot.fasta	40,479.7	100.0%	9	9	30	0.0521%	28.0%
Hexokinase-2 OS=Saccharomyces cerevisiae (strain ATCC 204508 / S288c) GN=HXK2 PE=1 SV=4	P04807|HXKB_YEAST	uniprot_sprot.fasta	53,944.7	100.0%	11	15	27	0.0530%	31.1%
Acetyl-CoA hydrolase OS=Saccharomyces cerevisiae (strain ATCC 204508 / S288c) GN=ACH1 PE=1 SV=2	P32316|ACH1_YEAST	uniprot_sprot.fasta	58,713.1	100.0%	9	11	27	0.0530%	24.0%
6-phosphofructokinase subunit beta OS=Saccharomyces cerevisiae (strain ATCC 204508 / S288c) GN=PFK2 PE=1 SV=4	P16862|K6PF2_YEAST	uniprot_sprot.fasta	104,619.8	100.0%	9	11	30	0.0536%	13.0%
Urea amidolyase OS=Saccharomyces cerevisiae (strain ATCC 204508 / S288c) GN=DUR1,2 PE=1 SV=2	P32528|DUR1_YEAST	uniprot_sprot.fasta	201,836.1	100.0%	15	16	31	0.0538%	11.6%
6-phosphofructokinase subunit beta OS=Saccharomyces cerevisiae (strain ATCC 204508 / S288c) GN=PFK2 PE=1 SV=4	P16862|K6PF2_YEAST	uniprot_sprot.fasta	104,619.8	100.0%	10	13	31	0.0538%	15.3%
Ubiquitin-activating enzyme E1-like OS=Saccharomyces cerevisiae (strain ATCC 204508 / S288c) GN=UBA2 PE=1 SV=1	P52488|UBA2_YEAST	uniprot_sprot.fasta	71,262.6	100.0%	10	12	31	0.0538%	16.4%
Adenosylhomocysteinase OS=Saccharomyces cerevisiae (strain ATCC 204508 / S288c) GN=SAH1 PE=1 SV=1	P39954|SAHH_YEAST	uniprot_sprot.fasta	49,125.8	100.0%	10	12	31	0.0538%	20.5%
Serine hydroxymethyltransferase, cytosolic OS=Saccharomyces cerevisiae (strain ATCC 204508 / S288c) GN=SHM2 PE=1 SV=2	P37291|GLYC_YEAST	uniprot_sprot.fasta	52,219.7	100.0%	10	12	28	0.0549%	28.1%
Elongation factor 1-gamma 2 OS=Saccharomyces cerevisiae (strain ATCC 204508 / S288c) GN=TEF4 PE=1 SV=1	P36008|EF1G2_YEAST	uniprot_sprot.fasta	46,521.9	100.0%	9	11	28	0.0549%	17.5%
Polyadenylate-binding protein, cytoplasmic and nuclear OS=Saccharomyces cerevisiae (strain ATCC 204508 / S288c) GN=PAB1 PE=1 SV=4	P04147|PABP_YEAST	uniprot_sprot.fasta	64,345.4	100.0%	10	11	28	0.0549%	21.5%
Serine hydroxymethyltransferase, cytosolic OS=Saccharomyces cerevisiae (strain ATCC 204508 / S288c) GN=SHM2 PE=1 SV=2	P37291|GLYC_YEAST	uniprot_sprot.fasta	52,219.7	100.0%	8	11	32	0.0555%	24.9%
60S acidic ribosomal protein P0 OS=Saccharomyces cerevisiae (strain ATCC 204508 / S288c) GN=RPP0 PE=1 SV=2	P05317|RLA0_YEAST	uniprot_sprot.fasta	33,717.4	100.0%	9	9	32	0.0555%	29.8%
Ribosome-associated complex subunit SSZ1 OS=Saccharomyces cerevisiae (strain ATCC 204508 / S288c) GN=SSZ1 PE=1 SV=2	P38788|SSZ1_YEAST	uniprot_sprot.fasta	58,239.5	100.0%	13	14	29	0.0569%	28.8%
Adenosylhomocysteinase OS=Saccharomyces cerevisiae (strain ATCC 204508 / S288c) GN=SAH1 PE=1 SV=1	P39954|SAHH_YEAST	uniprot_sprot.fasta	49,125.8	100.0%	10	13	29	0.0569%	20.5%
Glucose-6-phosphate isomerase OS=Saccharomyces cerevisiae (strain ATCC 204508 / S288c) GN=PGI1 PE=1 SV=3	P12709|G6PI_YEAST	uniprot_sprot.fasta	61,300.4	100.0%	13	17	32	0.0572%	29.1%
V-type proton ATPase catalytic subunit A OS=Saccharomyces cerevisiae (strain ATCC 204508 / S288c) GN=VMA1 PE=1 SV=3	P17255|VATA_YEAST	uniprot_sprot.fasta	118,639.8	100.0%	13	15	32	0.0572%	16.2%
Cytochrome b-c1 complex subunit 2, mitochondrial OS=Saccharomyces cerevisiae (strain ATCC 204508 / S288c) GN=QCR2 PE=1 SV=1	P07257|QCR2_YEAST	uniprot_sprot.fasta	40,479.7	100.0%	11	14	32	0.0572%	30.7%
Peroxiredoxin TSA1 OS=Saccharomyces cerevisiae (strain ATCC 204508 / S288c) GN=TSA1 PE=1 SV=3	P34760|TSA1_YEAST	uniprot_sprot.fasta	21,590.1	100.0%	5	6	32	0.0572%	29.6%
Fatty acid synthase subunit alpha OS=Saccharomyces cerevisiae (strain ATCC 204508 / S288c) GN=FAS2 PE=1 SV=2	P19097|FAS2_YEAST	uniprot_sprot.fasta	206,951.1	100.0%	18	19	33	0.0573%	13.6%
Isocitrate dehydrogenase [NAD] subunit 2, mitochondrial OS=Saccharomyces cerevisiae (strain ATCC 204508 / S288c) GN=IDH2 PE=1 SV=1	P28241|IDH2_YEAST	uniprot_sprot.fasta	39,740.6	100.0%	10	12	33	0.0573%	32.5%
Glucose-6-phosphate isomerase OS=Saccharomyces cerevisiae (strain ATCC 204508 / S288c) GN=PGI1 PE=1 SV=3	P12709|G6PI_YEAST	uniprot_sprot.fasta	61,300.4	100.0%	13	17	30	0.0589%	27.1%
Ubiquitin-activating enzyme E1-like OS=Saccharomyces cerevisiae (strain ATCC 204508 / S288c) GN=UBA2 PE=1 SV=1	P52488|UBA2_YEAST	uniprot_sprot.fasta	71,262.6	100.0%	11	13	30	0.0589%	17.8%
6-phosphofructokinase subunit beta OS=Saccharomyces cerevisiae (strain ATCC 204508 / S288c) GN=PFK2 PE=1 SV=4	P16862|K6PF2_YEAST	uniprot_sprot.fasta	104,619.8	100.0%	9	11	30	0.0589%	14.5%
Enolase 1 OS=Saccharomyces cerevisiae (strain ATCC 204508 / S288c) GN=ENO1 PE=1 SV=3	P00924|ENO1_YEAST	uniprot_sprot.fasta	46,817.4	100.0%	5	8	30	0.0589%	33.4%
Heat shock protein homolog SSE1 OS=Saccharomyces cerevisiae (strain ATCC 204508 / S288c) GN=SSE1 PE=1 SV=4	P32589|HSP7F_YEAST	uniprot_sprot.fasta	77,368.6	100.0%	8	11	33	0.0590%	16.5%
60S acidic ribosomal protein P0 OS=Saccharomyces cerevisiae (strain ATCC 204508 / S288c) GN=RPP0 PE=1 SV=2	P05317|RLA0_YEAST	uniprot_sprot.fasta	33,717.4	100.0%	9	10	33	0.0590%	29.8%
Adenosylhomocysteinase OS=Saccharomyces cerevisiae (strain ATCC 204508 / S288c) GN=SAH1 PE=1 SV=1	P39954|SAHH_YEAST	uniprot_sprot.fasta	49,125.8	100.0%	11	13	34	0.0607%	24.5%
Glutamate--tRNA ligase, cytoplasmic OS=Saccharomyces cerevisiae (strain ATCC 204508 / S288c) GN=GUS1 PE=1 SV=3	P46655|SYEC_YEAST	uniprot_sprot.fasta	80,846.2	100.0%	11	12	34	0.0607%	18.8%
Glyceraldehyde-3-phosphate dehydrogenase 1 OS=Saccharomyces cerevisiae (strain ATCC 204508 / S288c) GN=TDH1 PE=1 SV=3	P00360|G3P1_YEAST	uniprot_sprot.fasta	35,750.2	100.0%	11	13	31	0.0608%	49.4%
Malate dehydrogenase, mitochondrial OS=Saccharomyces cerevisiae (strain ATCC 204508 / S288c) GN=MDH1 PE=1 SV=2	P17505|MDHM_YEAST	uniprot_sprot.fasta	35,650.8	100.0%	12	16	36	0.0625%	37.7%
Citrate synthase, mitochondrial OS=Saccharomyces cerevisiae (strain ATCC 204508 / S288c) GN=CIT1 PE=1 SV=2	P00890|CISY1_YEAST	uniprot_sprot.fasta	53,362.3	100.0%	10	13	36	0.0625%	22.8%
Polyadenylate-binding protein, cytoplasmic and nuclear OS=Saccharomyces cerevisiae (strain ATCC 204508 / S288c) GN=PAB1 PE=1 SV=4	P04147|PABP_YEAST	uniprot_sprot.fasta	64,345.4	100.0%	11	12	36	0.0625%	24.8%
Potassium-activated aldehyde dehydrogenase, mitochondrial OS=Saccharomyces cerevisiae (strain ATCC 204508 / S288c) GN=ALD4 PE=1 SV=2	P46367|ALDH4_YEAST	uniprot_sprot.fasta	56,725.2	100.0%	12	12	35	0.0625%	29.1%
Transketolase 1 OS=Saccharomyces cerevisiae (strain ATCC 204508 / S288c) GN=TKL1 PE=1 SV=4	P23254|TKT1_YEAST	uniprot_sprot.fasta	73,807.9	100.0%	15	19	32	0.0628%	26.3%
Heat shock protein homolog SSE1 OS=Saccharomyces cerevisiae (strain ATCC 204508 / S288c) GN=SSE1 PE=1 SV=4	P32589|HSP7F_YEAST	uniprot_sprot.fasta	77,368.6	100.0%	11	14	32	0.0628%	22.4%
Malate synthase 1, glyoxysomal OS=Saccharomyces cerevisiae (strain ATCC 204508 / S288c) GN=MLS1 PE=1 SV=1	P30952|MASY_YEAST	uniprot_sprot.fasta	62,793.2	100.0%	10	12	32	0.0628%	21.1%
Isocitrate dehydrogenase [NAD] subunit 2, mitochondrial OS=Saccharomyces cerevisiae (strain ATCC 204508 / S288c) GN=IDH2 PE=1 SV=1	P28241|IDH2_YEAST	uniprot_sprot.fasta	39,740.6	100.0%	10	12	32	0.0628%	35.2%
V-type proton ATPase catalytic subunit A OS=Saccharomyces cerevisiae (strain ATCC 204508 / S288c) GN=VMA1 PE=1 SV=3	P17255|VATA_YEAST	uniprot_sprot.fasta	118,639.8	100.0%	15	16	38	0.0659%	18.2%
V-type proton ATPase catalytic subunit A OS=Saccharomyces cerevisiae (strain ATCC 204508 / S288c) GN=VMA1 PE=1 SV=3	P17255|VATA_YEAST	uniprot_sprot.fasta	118,639.8	100.0%	16	17	34	0.0667%	18.6%
ATP-dependent RNA helicase eIF4A OS=Saccharomyces cerevisiae (strain YJM789) GN=TIF1 PE=3 SV=1	A6ZQJ1|IF4A_YEAS7,P10081|IF4A_YEAST	uniprot_sprot.fasta	44,698.3	100.0%	10	11	39	0.0677%	29.4%
Isocitrate dehydrogenase [NAD] subunit 2, mitochondrial OS=Saccharomyces cerevisiae (strain ATCC 204508 / S288c) GN=IDH2 PE=1 SV=1	P28241|IDH2_YEAST	uniprot_sprot.fasta	39,740.6	100.0%	9	12	38	0.0679%	31.2%
Actin OS=Saccharomyces cerevisiae (strain ATCC 204508 / S288c) GN=ACT1 PE=1 SV=1	P60010|ACT_YEAST	uniprot_sprot.fasta	41,690.4	100.0%	9	11	38	0.0679%	33.1%
Actin OS=Saccharomyces cerevisiae (strain ATCC 204508 / S288c) GN=ACT1 PE=1 SV=1	P60010|ACT_YEAST	uniprot_sprot.fasta	41,690.4	100.0%	7	10	35	0.0687%	25.9%
Peroxiredoxin TSA1 OS=Saccharomyces cerevisiae (strain ATCC 204508 / S288c) GN=TSA1 PE=1 SV=3	P34760|TSA1_YEAST	uniprot_sprot.fasta	21,590.1	100.0%	6	7	35	0.0687%	40.3%
Inorganic pyrophosphatase OS=Saccharomyces cerevisiae (strain ATCC 204508 / S288c) GN=IPP1 PE=1 SV=4	P00817|IPYR_YEAST	uniprot_sprot.fasta	32,301.1	100.0%	12	16	36	0.0706%	42.5%
Mitochondrial phosphate carrier protein OS=Saccharomyces cerevisiae (strain ATCC 204508 / S288c) GN=MIR1 PE=1 SV=1	P23641|MPCP_YEAST	uniprot_sprot.fasta	32,813.9	100.0%	11	12	36	0.0706%	31.8%
Magnesium-activated aldehyde dehydrogenase, cytosolic OS=Saccharomyces cerevisiae (strain ATCC 204508 / S288c) GN=ALD6 PE=1 SV=4	P54115|ALDH6_YEAST	uniprot_sprot.fasta	54,415.5	100.0%	12	14	41	0.0712%	28.4%
6-phosphogluconate dehydrogenase, decarboxylating 1 OS=Saccharomyces cerevisiae (strain ATCC 204508 / S288c) GN=GND1 PE=1 SV=1	P38720|6PGD1_YEAST	uniprot_sprot.fasta	53,545.3	100.0%	13	13	40	0.0715%	25.6%
Ketol-acid reductoisomerase, mitochondrial OS=Saccharomyces cerevisiae (strain ATCC 204508 / S288c) GN=ILV5 PE=1 SV=1	P06168|ILV5_YEAST	uniprot_sprot.fasta	44,369.9	100.0%	11	15	37	0.0726%	27.3%
Cytochrome b-c1 complex subunit 2, mitochondrial OS=Saccharomyces cerevisiae (strain ATCC 204508 / S288c) GN=QCR2 PE=1 SV=1	P07257|QCR2_YEAST	uniprot_sprot.fasta	40,479.7	100.0%	9	13	37	0.0726%	28.0%
Fatty acid synthase subunit beta OS=Saccharomyces cerevisiae (strain ATCC 204508 / S288c) GN=FAS1 PE=1 SV=2	P07149|FAS1_YEAST	uniprot_sprot.fasta	228,696.0	100.0%	25	27	42	0.0729%	17.6%
Triosephosphate isomerase OS=Saccharomyces cerevisiae (strain ATCC 204508 / S288c) GN=TPI1 PE=1 SV=2	P00942|TPIS_YEAST	uniprot_sprot.fasta	26,795.6	100.0%	10	14	42	0.0729%	38.3%
Glutamate--tRNA ligase, cytoplasmic OS=Saccharomyces cerevisiae (strain ATCC 204508 / S288c) GN=GUS1 PE=1 SV=3	P46655|SYEC_YEAST	uniprot_sprot.fasta	80,846.2	100.0%	13	14	42	0.0729%	22.2%
Inorganic pyrophosphatase OS=Saccharomyces cerevisiae (strain ATCC 204508 / S288c) GN=IPP1 PE=1 SV=4	P00817|IPYR_YEAST	uniprot_sprot.fasta	32,301.1	100.0%	14	19	42	0.0750%	48.8%
6-phosphogluconate dehydrogenase, decarboxylating 1 OS=Saccharomyces cerevisiae (strain ATCC 204508 / S288c) GN=GND1 PE=1 SV=1	P38720|6PGD1_YEAST	uniprot_sprot.fasta	53,545.3	100.0%	13	13	44	0.0764%	29.2%
Glutamate--tRNA ligase, cytoplasmic OS=Saccharomyces cerevisiae (strain ATCC 204508 / S288c) GN=GUS1 PE=1 SV=3	P46655|SYEC_YEAST	uniprot_sprot.fasta	80,846.2	100.0%	15	18	40	0.0785%	25.4%
Ketol-acid reductoisomerase, mitochondrial OS=Saccharomyces cerevisiae (strain ATCC 204508 / S288c) GN=ILV5 PE=1 SV=1	P06168|ILV5_YEAST	uniprot_sprot.fasta	44,369.9	100.0%	15	18	44	0.0786%	33.9%
ADP,ATP carrier protein 2 OS=Saccharomyces cerevisiae (strain ATCC 204508 / S288c) GN=PET9 PE=1 SV=2	P18239|ADT2_YEAST	uniprot_sprot.fasta	34,428.0	100.0%	9	11	44	0.0786%	28.6%
Phosphoglycerate mutase 1 OS=Saccharomyces cerevisiae (strain ATCC 204508 / S288c) GN=GPM1 PE=1 SV=3	P00950|PMG1_YEAST	uniprot_sprot.fasta	27,609.7	100.0%	13	18	45	0.0804%	36.8%
Triosephosphate isomerase OS=Saccharomyces cerevisiae (strain ATCC 204508 / S288c) GN=TPI1 PE=1 SV=2	P00942|TPIS_YEAST	uniprot_sprot.fasta	26,795.6	100.0%	9	15	45	0.0804%	37.5%
Elongation factor 3A OS=Saccharomyces cerevisiae (strain ATCC 204508 / S288c) GN=YEF3 PE=1 SV=4	P16521|EF3A_YEAST	uniprot_sprot.fasta	115,948.1	100.0%	16	19	47	0.0816%	17.1%
ATP-dependent RNA helicase eIF4A OS=Saccharomyces cerevisiae (strain YJM789) GN=TIF1 PE=3 SV=1	A6ZQJ1|IF4A_YEAS7,P10081|IF4A_YEAST	uniprot_sprot.fasta	44,698.3	100.0%	12	13	46	0.0822%	34.7%
ADP,ATP carrier protein 2 OS=Saccharomyces cerevisiae (strain ATCC 204508 / S288c) GN=PET9 PE=1 SV=2	P18239|ADT2_YEAST	uniprot_sprot.fasta	34,428.0	100.0%	8	12	48	0.0833%	24.8%
Glyceraldehyde-3-phosphate dehydrogenase 1 OS=Saccharomyces cerevisiae (strain ATCC 204508 / S288c) GN=TDH1 PE=1 SV=3	P00360|G3P1_YEAST	uniprot_sprot.fasta	35,750.2	100.0%	12	16	49	0.0875%	56.3%
ADP,ATP carrier protein 2 OS=Saccharomyces cerevisiae (strain ATCC 204508 / S288c) GN=PET9 PE=1 SV=2	P18239|ADT2_YEAST	uniprot_sprot.fasta	34,428.0	100.0%	9	12	45	0.0883%	25.2%
Ubiquitin-like protein SMT3 OS=Saccharomyces cerevisiae (strain ATCC 204508 / S288c) GN=SMT3 PE=1 SV=1	Q12306|SMT3_YEAST	uniprot_sprot.fasta	11,597.5	100.0%	4	6	45	0.0883%	41.6%
Citrate synthase, mitochondrial OS=Saccharomyces cerevisiae (strain ATCC 204508 / S288c) GN=CIT1 PE=1 SV=2	P00890|CISY1_YEAST	uniprot_sprot.fasta	53,362.3	100.0%	14	17	46	0.0903%	30.7%
6-phosphogluconate dehydrogenase, decarboxylating 1 OS=Saccharomyces cerevisiae (strain ATCC 204508 / S288c) GN=GND1 PE=1 SV=1	P38720|6PGD1_YEAST	uniprot_sprot.fasta	53,545.3	100.0%	14	15	46	0.0903%	29.2%
Enolase 1 OS=Saccharomyces cerevisiae (strain ATCC 204508 / S288c) GN=ENO1 PE=1 SV=3	P00924|ENO1_YEAST	uniprot_sprot.fasta	46,817.4	100.0%	8	12	53	0.0947%	45.5%
ATP-dependent RNA helicase eIF4A OS=Saccharomyces cerevisiae (strain YJM789) GN=TIF1 PE=3 SV=1	A6ZQJ1|IF4A_YEAS7,P10081|IF4A_YEAST	uniprot_sprot.fasta	44,698.3	100.0%	11	14	49	0.0961%	29.4%
Magnesium-activated aldehyde dehydrogenase, cytosolic OS=Saccharomyces cerevisiae (strain ATCC 204508 / S288c) GN=ALD6 PE=1 SV=4	P54115|ALDH6_YEAST	uniprot_sprot.fasta	54,415.5	100.0%	17	22	50	0.0981%	38.2%
Triosephosphate isomerase OS=Saccharomyces cerevisiae (strain ATCC 204508 / S288c) GN=TPI1 PE=1 SV=2	P00942|TPIS_YEAST	uniprot_sprot.fasta	26,795.6	100.0%	9	14	50	0.0981%	37.5%
Potassium-activated aldehyde dehydrogenase, mitochondrial OS=Saccharomyces cerevisiae (strain ATCC 204508 / S288c) GN=ALD4 PE=1 SV=2	P46367|ALDH4_YEAST	uniprot_sprot.fasta	56,725.2	100.0%	15	18	57	0.0989%	33.5%
Malate dehydrogenase, mitochondrial OS=Saccharomyces cerevisiae (strain ATCC 204508 / S288c) GN=MDH1 PE=1 SV=2	P17505|MDHM_YEAST	uniprot_sprot.fasta	35,650.8	100.0%	18	25	56	0.100%	58.7%
Ubiquitin-like protein SMT3 OS=Saccharomyces cerevisiae (strain ATCC 204508 / S288c) GN=SMT3 PE=1 SV=1	Q12306|SMT3_YEAST	uniprot_sprot.fasta	11,597.5	100.0%	4	6	58	0.101%	41.6%
Citrate synthase, mitochondrial OS=Saccharomyces cerevisiae (strain ATCC 204508 / S288c) GN=CIT1 PE=1 SV=2	P00890|CISY1_YEAST	uniprot_sprot.fasta	53,362.3	100.0%	13	16	57	0.102%	29.6%
Aconitate hydratase, mitochondrial OS=Saccharomyces cerevisiae (strain ATCC 204508 / S288c) GN=ACO1 PE=1 SV=2	P19414|ACON_YEAST	uniprot_sprot.fasta	85,371.6	100.0%	16	18	60	0.104%	24.0%
Mannose-1-phosphate guanyltransferase OS=Saccharomyces cerevisiae (strain ATCC 204508 / S288c) GN=PSA1 PE=1 SV=2	P41940|MPG1_YEAST	uniprot_sprot.fasta	39,566.6	100.0%	8	13	60	0.104%	24.7%
Heat shock protein 104 OS=Saccharomyces cerevisiae (strain ATCC 204508 / S288c) GN=HSP104 PE=1 SV=2	P31539|HS104_YEAST	uniprot_sprot.fasta	102,039.6	100.0%	18	21	53	0.104%	23.6%
Heat shock protein 60, mitochondrial OS=Saccharomyces cerevisiae (strain ATCC 204508 / S288c) GN=HSP60 PE=1 SV=1	P19882|HSP60_YEAST	uniprot_sprot.fasta	60,753.0	100.0%	14	16	61	0.106%	29.7%
Malate dehydrogenase, mitochondrial OS=Saccharomyces cerevisiae (strain ATCC 204508 / S288c) GN=MDH1 PE=1 SV=2	P17505|MDHM_YEAST	uniprot_sprot.fasta	35,650.8	100.0%	16	21	54	0.106%	49.7%
Phosphoglycerate mutase 1 OS=Saccharomyces cerevisiae (strain ATCC 204508 / S288c) GN=GPM1 PE=1 SV=3	P00950|PMG1_YEAST	uniprot_sprot.fasta	27,609.7	100.0%	13	18	54	0.106%	36.4%
Aconitate hydratase, mitochondrial OS=Saccharomyces cerevisiae (strain ATCC 204508 / S288c) GN=ACO1 PE=1 SV=2	P19414|ACON_YEAST	uniprot_sprot.fasta	85,371.6	100.0%	17	18	55	0.108%	25.2%
Pyruvate decarboxylase isozyme 1 OS=Saccharomyces cerevisiae (strain ATCC 204508 / S288c) GN=PDC1 PE=1 SV=7	P06169|PDC1_YEAST	uniprot_sprot.fasta	61,496.9	100.0%	12	15	63	0.109%	34.6%
Elongation factor 3A OS=Saccharomyces cerevisiae (strain ATCC 204508 / S288c) GN=YEF3 PE=1 SV=4	P16521|EF3A_YEAST	uniprot_sprot.fasta	115,948.1	100.0%	20	23	56	0.110%	18.7%
Protein URA2 OS=Saccharomyces cerevisiae (strain ATCC 204508 / S288c) GN=URA2 PE=1 SV=5	P07259|PYR1_YEAST	uniprot_sprot.fasta	245,044.8	100.0%	34	35	64	0.114%	17.9%
Potassium-activated aldehyde dehydrogenase, mitochondrial OS=Saccharomyces cerevisiae (strain ATCC 204508 / S288c) GN=ALD4 PE=1 SV=2	P46367|ALDH4_YEAST	uniprot_sprot.fasta	56,725.2	100.0%	14	17	60	0.118%	31.6%
Elongation factor 3A OS=Saccharomyces cerevisiae (strain ATCC 204508 / S288c) GN=YEF3 PE=1 SV=4	P16521|EF3A_YEAST	uniprot_sprot.fasta	115,948.1	100.0%	20	26	68	0.121%	19.0%
Protein URA2 OS=Saccharomyces cerevisiae (strain ATCC 204508 / S288c) GN=URA2 PE=1 SV=5	P07259|PYR1_YEAST	uniprot_sprot.fasta	245,044.8	100.0%	35	37	62	0.122%	18.2%
Mannose-1-phosphate guanyltransferase OS=Saccharomyces cerevisiae (strain ATCC 204508 / S288c) GN=PSA1 PE=1 SV=2	P41940|MPG1_YEAST	uniprot_sprot.fasta	39,566.6	100.0%	9	13	69	0.123%	26.3%
Heat shock protein 104 OS=Saccharomyces cerevisiae (strain ATCC 204508 / S288c) GN=HSP104 PE=1 SV=2	P31539|HS104_YEAST	uniprot_sprot.fasta	102,039.6	100.0%	28	31	74	0.128%	32.3%
Plasma membrane ATPase 1 OS=Saccharomyces cerevisiae (strain ATCC 204508 / S288c) GN=PMA1 PE=1 SV=2	P05030|PMA1_YEAST	uniprot_sprot.fasta	99,621.6	100.0%	18	25	72	0.129%	19.1%
Aconitate hydratase, mitochondrial OS=Saccharomyces cerevisiae (strain ATCC 204508 / S288c) GN=ACO1 PE=1 SV=2	P19414|ACON_YEAST	uniprot_sprot.fasta	85,371.6	100.0%	19	21	72	0.129%	28.1%
Heat shock protein 60, mitochondrial OS=Saccharomyces cerevisiae (strain ATCC 204508 / S288c) GN=HSP60 PE=1 SV=1	P19882|HSP60_YEAST	uniprot_sprot.fasta	60,753.0	100.0%	14	15	74	0.132%	32.3%
Mannose-1-phosphate guanyltransferase OS=Saccharomyces cerevisiae (strain ATCC 204508 / S288c) GN=PSA1 PE=1 SV=2	P41940|MPG1_YEAST	uniprot_sprot.fasta	39,566.6	100.0%	8	12	69	0.135%	24.7%
Protein URA2 OS=Saccharomyces cerevisiae (strain ATCC 204508 / S288c) GN=URA2 PE=1 SV=5	P07259|PYR1_YEAST	uniprot_sprot.fasta	245,044.8	100.0%	42	42	79	0.137%	22.2%
Plasma membrane ATPase 1 OS=Saccharomyces cerevisiae (strain ATCC 204508 / S288c) GN=PMA1 PE=1 SV=2	P05030|PMA1_YEAST	uniprot_sprot.fasta	99,621.6	100.0%	17	24	70	0.137%	18.8%
Magnesium-activated aldehyde dehydrogenase, cytosolic OS=Saccharomyces cerevisiae (strain ATCC 204508 / S288c) GN=ALD6 PE=1 SV=4	P54115|ALDH6_YEAST	uniprot_sprot.fasta	54,415.5	100.0%	17	23	77	0.138%	35.6%
Fructose-bisphosphate aldolase OS=Saccharomyces cerevisiae (strain ATCC 204508 / S288c) GN=FBA1 PE=1 SV=3	P14540|ALF_YEAST	uniprot_sprot.fasta	39,621.5	100.0%	11	16	77	0.138%	29.8%
Plasma membrane ATPase 1 OS=Saccharomyces cerevisiae (strain ATCC 204508 / S288c) GN=PMA1 PE=1 SV=2	P05030|PMA1_YEAST	uniprot_sprot.fasta	99,621.6	100.0%	19	25	80	0.139%	18.8%
Fructose-bisphosphate aldolase OS=Saccharomyces cerevisiae (strain ATCC 204508 / S288c) GN=FBA1 PE=1 SV=3	P14540|ALF_YEAST	uniprot_sprot.fasta	39,621.5	100.0%	10	15	81	0.141%	29.8%
Pyruvate decarboxylase isozyme 1 OS=Saccharomyces cerevisiae (strain ATCC 204508 / S288c) GN=PDC1 PE=1 SV=7	P06169|PDC1_YEAST	uniprot_sprot.fasta	61,496.9	100.0%	14	20	79	0.141%	40.3%
Heat shock protein 60, mitochondrial OS=Saccharomyces cerevisiae (strain ATCC 204508 / S288c) GN=HSP60 PE=1 SV=1	P19882|HSP60_YEAST	uniprot_sprot.fasta	60,753.0	100.0%	18	23	78	0.153%	37.2%
Pyruvate decarboxylase isozyme 1 OS=Saccharomyces cerevisiae (strain ATCC 204508 / S288c) GN=PDC1 PE=1 SV=7	P06169|PDC1_YEAST	uniprot_sprot.fasta	61,496.9	100.0%	11	18	79	0.155%	28.6%
Fructose-bisphosphate aldolase OS=Saccharomyces cerevisiae (strain ATCC 204508 / S288c) GN=FBA1 PE=1 SV=3	P14540|ALF_YEAST	uniprot_sprot.fasta	39,621.5	100.0%	11	17	85	0.167%	33.4%
Elongation factor 2 OS=Saccharomyces cerevisiae (strain ATCC 204508 / S288c) GN=EFT1 PE=1 SV=1	P32324|EF2_YEAST	uniprot_sprot.fasta	93,290.3	100.0%	19	24	97	0.168%	23.6%
ATP synthase subunit beta, mitochondrial OS=Saccharomyces cerevisiae (strain ATCC 204508 / S288c) GN=ATP2 PE=1 SV=2	P00830|ATPB_YEAST	uniprot_sprot.fasta	54,794.7	100.0%	18	20	101	0.175%	41.3%
Heat shock protein 104 OS=Saccharomyces cerevisiae (strain ATCC 204508 / S288c) GN=HSP104 PE=1 SV=2	P31539|HS104_YEAST	uniprot_sprot.fasta	102,039.6	100.0%	22	28	98	0.175%	28.4%
Glyceraldehyde-3-phosphate dehydrogenase 3 OS=Saccharomyces cerevisiae (strain ATCC 204508 / S288c) GN=TDH3 PE=1 SV=3	P00359|G3P3_YEAST	uniprot_sprot.fasta	35,746.6	100.0%	12	20	103	0.179%	33.4%
ATP synthase subunit alpha, mitochondrial OS=Saccharomyces cerevisiae (strain ATCC 204508 / S288c) GN=ATP1 PE=1 SV=5	P07251|ATPA_YEAST	uniprot_sprot.fasta	58,609.4	100.0%	21	26	106	0.184%	33.9%
Heat shock protein SSC1, mitochondrial OS=Saccharomyces cerevisiae (strain ATCC 204508 / S288c) GN=SSC1 PE=1 SV=1	P12398|HSP77_YEAST	uniprot_sprot.fasta	70,628.8	100.0%	15	21	105	0.188%	25.7%
Heat shock protein SSC1, mitochondrial OS=Saccharomyces cerevisiae (strain ATCC 204508 / S288c) GN=SSC1 PE=1 SV=1	P12398|HSP77_YEAST	uniprot_sprot.fasta	70,628.8	100.0%	16	21	109	0.189%	26.3%
Elongation factor 2 OS=Saccharomyces cerevisiae (strain ATCC 204508 / S288c) GN=EFT1 PE=1 SV=1	P32324|EF2_YEAST	uniprot_sprot.fasta	93,290.3	100.0%	19	23	97	0.190%	20.4%
Enolase 2 OS=Saccharomyces cerevisiae (strain ATCC 204508 / S288c) GN=ENO2 PE=1 SV=2	P00925|ENO2_YEAST	uniprot_sprot.fasta	46,915.1	100.0%	17	24	114	0.198%	41.0%
ATP synthase subunit alpha, mitochondrial OS=Saccharomyces cerevisiae (strain ATCC 204508 / S288c) GN=ATP1 PE=1 SV=5	P07251|ATPA_YEAST	uniprot_sprot.fasta	58,609.4	100.0%	19	23	111	0.198%	33.8%
Phosphoglycerate kinase OS=Saccharomyces cerevisiae (strain ATCC 204508 / S288c) GN=PGK1 PE=1 SV=2	P00560|PGK_YEAST	uniprot_sprot.fasta	44,739.6	100.0%	23	28	115	0.200%	54.8%
Elongation factor 2 OS=Saccharomyces cerevisiae (strain ATCC 204508 / S288c) GN=EFT1 PE=1 SV=1	P32324|EF2_YEAST	uniprot_sprot.fasta	93,290.3	100.0%	28	33	113	0.202%	31.8%
Heat shock protein SSC1, mitochondrial OS=Saccharomyces cerevisiae (strain ATCC 204508 / S288c) GN=SSC1 PE=1 SV=1	P12398|HSP77_YEAST	uniprot_sprot.fasta	70,628.8	100.0%	16	22	103	0.202%	26.6%
ATP-dependent molecular chaperone HSC82 OS=Saccharomyces cerevisiae (strain ATCC 204508 / S288c) GN=HSC82 PE=1 SV=4	P15108|HSC82_YEAST	uniprot_sprot.fasta	80,903.4	100.0%	28	36	130	0.226%	37.4%
Alcohol dehydrogenase 1 OS=Saccharomyces cerevisiae (strain ATCC 204508 / S288c) GN=ADH1 PE=1 SV=5	P00330|ADH1_YEAST	uniprot_sprot.fasta	36,848.7	100.0%	17	23	134	0.233%	47.7%
ATP synthase subunit alpha, mitochondrial OS=Saccharomyces cerevisiae (strain ATCC 204508 / S288c) GN=ATP1 PE=1 SV=5	P07251|ATPA_YEAST	uniprot_sprot.fasta	58,609.4	100.0%	25	33	119	0.233%	45.0%
Elongation factor 1-alpha OS=Saccharomyces cerevisiae (strain ATCC 204508 / S288c) GN=TEF1 PE=1 SV=1	P02994|EF1A_YEAST	uniprot_sprot.fasta	50,032.6	100.0%	16	24	141	0.245%	38.6%
ATP synthase subunit beta, mitochondrial OS=Saccharomyces cerevisiae (strain ATCC 204508 / S288c) GN=ATP2 PE=1 SV=2	P00830|ATPB_YEAST	uniprot_sprot.fasta	54,794.7	100.0%	23	30	138	0.247%	50.7%
Heat shock protein SSB2 OS=Saccharomyces cerevisiae (strain ATCC 204508 / S288c) GN=SSB2 PE=1 SV=2	P40150|HSP76_YEAST	uniprot_sprot.fasta	66,595.7	100.0%	23	30	143	0.248%	40.6%
ATP synthase subunit beta, mitochondrial OS=Saccharomyces cerevisiae (strain ATCC 204508 / S288c) GN=ATP2 PE=1 SV=2	P00830|ATPB_YEAST	uniprot_sprot.fasta	54,794.7	100.0%	19	24	127	0.249%	41.9%
Heat shock protein SSB2 OS=Saccharomyces cerevisiae (strain ATCC 204508 / S288c) GN=SSB2 PE=1 SV=2	P40150|HSP76_YEAST	uniprot_sprot.fasta	66,595.7	100.0%	19	28	145	0.259%	36.5%
ATP-dependent molecular chaperone HSC82 OS=Saccharomyces cerevisiae (strain ATCC 204508 / S288c) GN=HSC82 PE=1 SV=4	P15108|HSC82_YEAST	uniprot_sprot.fasta	80,903.4	100.0%	30	40	133	0.261%	37.6%
Enolase 2 OS=Saccharomyces cerevisiae (strain ATCC 204508 / S288c) GN=ENO2 PE=1 SV=2	P00925|ENO2_YEAST	uniprot_sprot.fasta	46,915.1	100.0%	20	26	134	0.263%	49.2%
Phosphoglycerate kinase OS=Saccharomyces cerevisiae (strain ATCC 204508 / S288c) GN=PGK1 PE=1 SV=2	P00560|PGK_YEAST	uniprot_sprot.fasta	44,739.6	100.0%	24	34	148	0.264%	56.0%
Alcohol dehydrogenase 1 OS=Saccharomyces cerevisiae (strain ATCC 204508 / S288c) GN=ADH1 PE=1 SV=5	P00330|ADH1_YEAST	uniprot_sprot.fasta	36,848.7	100.0%	18	26	149	0.266%	48.0%
Phosphoglycerate kinase OS=Saccharomyces cerevisiae (strain ATCC 204508 / S288c) GN=PGK1 PE=1 SV=2	P00560|PGK_YEAST	uniprot_sprot.fasta	44,739.6	100.0%	24	31	137	0.269%	54.8%
Glyceraldehyde-3-phosphate dehydrogenase 3 OS=Saccharomyces cerevisiae (strain ATCC 204508 / S288c) GN=TDH3 PE=1 SV=3	P00359|G3P3_YEAST	uniprot_sprot.fasta	35,746.6	100.0%	14	22	137	0.269%	41.6%
3-isopropylmalate dehydratase OS=Saccharomyces cerevisiae (strain ATCC 204508 / S288c) GN=LEU1 PE=1 SV=3	P07264|LEUC_YEAST	uniprot_sprot.fasta	85,797.0	100.0%	23	34	151	0.270%	35.7%
Elongation factor 1-alpha OS=Saccharomyces cerevisiae (strain ATCC 204508 / S288c) GN=TEF1 PE=1 SV=1	P02994|EF1A_YEAST	uniprot_sprot.fasta	50,032.6	100.0%	15	25	138	0.271%	36.0%
Heat shock protein SSA2 OS=Saccharomyces cerevisiae (strain ATCC 204508 / S288c) GN=SSA2 PE=1 SV=3	P10592|HSP72_YEAST	uniprot_sprot.fasta	69,471.8	100.0%	22	33	153	0.273%	35.1%
Glyceraldehyde-3-phosphate dehydrogenase 3 OS=Saccharomyces cerevisiae (strain ATCC 204508 / S288c) GN=TDH3 PE=1 SV=3	P00359|G3P3_YEAST	uniprot_sprot.fasta	35,746.6	100.0%	14	24	153	0.273%	40.7%
Heat shock protein SSA2 OS=Saccharomyces cerevisiae (strain ATCC 204508 / S288c) GN=SSA2 PE=1 SV=3	P10592|HSP72_YEAST	uniprot_sprot.fasta	69,471.8	100.0%	22	32	161	0.279%	39.0%
Elongation factor 1-alpha OS=Saccharomyces cerevisiae (strain ATCC 204508 / S288c) GN=TEF1 PE=1 SV=1	P02994|EF1A_YEAST	uniprot_sprot.fasta	50,032.6	100.0%	18	32	160	0.286%	40.2%
ATP-dependent molecular chaperone HSC82 OS=Saccharomyces cerevisiae (strain ATCC 204508 / S288c) GN=HSC82 PE=1 SV=4	P15108|HSC82_YEAST	uniprot_sprot.fasta	80,903.4	100.0%	27	36	161	0.288%	37.3%
Alcohol dehydrogenase 1 OS=Saccharomyces cerevisiae (strain ATCC 204508 / S288c) GN=ADH1 PE=1 SV=5	P00330|ADH1_YEAST	uniprot_sprot.fasta	36,848.7	100.0%	19	28	149	0.292%	51.1%
Heat shock protein SSA2 OS=Saccharomyces cerevisiae (strain ATCC 204508 / S288c) GN=SSA2 PE=1 SV=3	P10592|HSP72_YEAST	uniprot_sprot.fasta	69,471.8	100.0%	22	32	151	0.296%	39.9%
Pyruvate kinase 1 OS=Saccharomyces cerevisiae (strain ATCC 204508 / S288c) GN=CDC19 PE=1 SV=2	P00549|KPYK1_YEAST	uniprot_sprot.fasta	54,545.4	100.0%	24	33	173	0.300%	46.6%
Enolase 2 OS=Saccharomyces cerevisiae (strain ATCC 204508 / S288c) GN=ENO2 PE=1 SV=2	P00925|ENO2_YEAST	uniprot_sprot.fasta	46,915.1	100.0%	23	34	168	0.300%	54.0%
3-isopropylmalate dehydratase OS=Saccharomyces cerevisiae (strain ATCC 204508 / S288c) GN=LEU1 PE=1 SV=3	P07264|LEUC_YEAST	uniprot_sprot.fasta	85,797.0	100.0%	28	38	179	0.311%	39.7%
Heat shock protein SSB2 OS=Saccharomyces cerevisiae (strain ATCC 204508 / S288c) GN=SSB2 PE=1 SV=2	P40150|HSP76_YEAST	uniprot_sprot.fasta	66,595.7	100.0%	22	31	160	0.314%	40.6%
3-isopropylmalate dehydratase OS=Saccharomyces cerevisiae (strain ATCC 204508 / S288c) GN=LEU1 PE=1 SV=3	P07264|LEUC_YEAST	uniprot_sprot.fasta	85,797.0	100.0%	28	39	171	0.336%	36.8%
Pyruvate kinase 1 OS=Saccharomyces cerevisiae (strain ATCC 204508 / S288c) GN=CDC19 PE=1 SV=2	P00549|KPYK1_YEAST	uniprot_sprot.fasta	54,545.4	100.0%	25	38	216	0.386%	44.4%
Pyruvate kinase 1 OS=Saccharomyces cerevisiae (strain ATCC 204508 / S288c) GN=CDC19 PE=1 SV=2	P00549|KPYK1_YEAST	uniprot_sprot.fasta	54,545.4	100.0%	26	39	202	0.396%	48.2%

## Sheet: 2. MS TCA lysis
Id	Protein IDs	Peptide counts (all)	Peptide counts (unique)	Protein names	Gene names	Fasta headers	Proteins	Peptides	Unique peptides	Peptides His-Smt3	Peptides Smt3	Sequence coverage His-Smt3	Sequence coverage Smt3
1	E9PAE3	23	2		truncated TYB	>tr|E9PAE3|E9PAE3_YEAST Putative uncharacterized protein truncated TYB OS=Saccharomyces cerevisiae (strain ATCC 204508 / S288c) GN=truncated TYB PE=4 SV=1	1	23	2	23	20	51.9	40.7
2	O13297	1	1	mRNA-capping enzyme subunit beta	CET1	>sp|O13297|CET1_YEAST mRNA-capping enzyme subunit beta OS=Saccharomyces cerevisiae (strain ATCC 204508 / S288c) GN=CET1 PE=1 SV=2	1	1	1	0	1	0	3.5
3	O13329	3	2	DNA replication fork-blocking protein FOB1	FOB1	>sp|O13329|FOB1_YEAST DNA replication fork-blocking protein FOB1 OS=Saccharomyces cerevisiae (strain ATCC 204508 / S288c) GN=FOB1 PE=1 SV=2	1	3	2	3	0	8	0
4	O13533	1	1	Putative uncharacterized protein YHR049C-A	YHR049C-A	>sp|O13533|YH049_YEAST Putative uncharacterized protein YHR049C-A OS=Saccharomyces cerevisiae (strain ATCC 204508 / S288c) GN=YHR049C-A PE=5 SV=1	1	1	1	1	0	25.2	0
5	P00330	19	13	Alcohol dehydrogenase 1	ADH1	>sp|P00330|ADH1_YEAST Alcohol dehydrogenase 1 OS=Saccharomyces cerevisiae (strain ATCC 204508 / S288c) GN=ADH1 PE=1 SV=5	1	19	13	16	18	45.4	53.2
6	P00331	16;1	10;0	Alcohol dehydrogenase 2	ADH2	>sp|P00331|ADH2_YEAST Alcohol dehydrogenase 2 OS=Saccharomyces cerevisiae (strain ATCC 204508 / S288c) GN=ADH2 PE=1 SV=3	2	16	10	16	14	54.6	54.6
7	P00359	15	2	Glyceraldehyde-3-phosphate dehydrogenase 3	TDH3	>sp|P00359|G3P3_YEAST Glyceraldehyde-3-phosphate dehydrogenase 3 OS=Saccharomyces cerevisiae (strain ATCC 204508 / S288c) GN=TDH3 PE=1 SV=3	1	15	2	13	13	49.1	44.9
8	P00360	11	5	Glyceraldehyde-3-phosphate dehydrogenase 1	TDH1	>sp|P00360|G3P1_YEAST Glyceraldehyde-3-phosphate dehydrogenase 1 OS=Saccharomyces cerevisiae (strain ATCC 204508 / S288c) GN=TDH1 PE=1 SV=3	1	11	5	9	9	37	41
9	P00410	6	6	Cytochrome c oxidase subunit 2	COX2	>sp|P00410|COX2_YEAST Cytochrome c oxidase subunit 2 OS=Saccharomyces cerevisiae (strain ATCC 204508 / S288c) GN=COX2 PE=1 SV=1	1	6	6	3	6	18.7	37.5
10	P00445	5	5	Superoxide dismutase [Cu-Zn]	SOD1	>sp|P00445|SODC_YEAST Superoxide dismutase [Cu-Zn] OS=Saccharomyces cerevisiae (strain ATCC 204508 / S288c) GN=SOD1 PE=1 SV=2	1	5	5	4	2	36.4	22.7
11	P00447	1	1	Superoxide dismutase [Mn], mitochondrial	SOD2	>sp|P00447|SODM_YEAST Superoxide dismutase [Mn], mitochondrial OS=Saccharomyces cerevisiae (strain ATCC 204508 / S288c) GN=SOD2 PE=1 SV=1	1	1	1	0	1	0	6
12	P00549	9;1	9;1	Pyruvate kinase 1	CDC19	>sp|P00549|KPYK1_YEAST Pyruvate kinase 1 OS=Saccharomyces cerevisiae (strain ATCC 204508 / S288c) GN=CDC19 PE=1 SV=2	2	9	9	6	7	14.2	19
13	P00560	14	14	Phosphoglycerate kinase	PGK1	>sp|P00560|PGK_YEAST Phosphoglycerate kinase OS=Saccharomyces cerevisiae (strain ATCC 204508 / S288c) GN=PGK1 PE=1 SV=2	1	14	14	11	10	35.8	25.2
14	P00924	12	4	Enolase 1	ENO1	>sp|P00924|ENO1_YEAST Enolase 1 OS=Saccharomyces cerevisiae (strain ATCC 204508 / S288c) GN=ENO1 PE=1 SV=3	1	12	4	7	11	19	31.4
15	P00925	14	6	Enolase 2	ENO2	>sp|P00925|ENO2_YEAST Enolase 2 OS=Saccharomyces cerevisiae (strain ATCC 204508 / S288c) GN=ENO2 PE=1 SV=2	1	14	6	11	13	29.7	38.2
16	P00927	12	12	Threonine dehydratase, mitochondrial	ILV1	>sp|P00927|THDH_YEAST Threonine dehydratase, mitochondrial OS=Saccharomyces cerevisiae (strain ATCC 204508 / S288c) GN=ILV1 PE=1 SV=2	1	12	12	11	5	26.4	11.6
17	P00931	4	4	Tryptophan synthase	TRP5	>sp|P00931|TRP_YEAST Tryptophan synthase OS=Saccharomyces cerevisiae (strain ATCC 204508 / S288c) GN=TRP5 PE=1 SV=1	1	4	4	4	3	9.5	6.5
18	P00958	2	2	Methionine--tRNA ligase, cytoplasmic	MES1	>sp|P00958|SYMC_YEAST Methionine--tRNA ligase, cytoplasmic OS=Saccharomyces cerevisiae (strain ATCC 204508 / S288c) GN=MES1 PE=1 SV=4	1	2	2	0	2	0	2.9
19	P02293;P02294	1;1	1;1	Histone H2B.1;Histone H2B.2	HTB1;HTB2	>sp|P02293|H2B1_YEAST Histone H2B.1 OS=Saccharomyces cerevisiae (strain ATCC 204508 / S288c) GN=HTB1 PE=1 SV=2;>sp|P02294|H2B2_YEAST Histone H2B.2 OS=Saccharomyces cerevisiae (strain ATCC 204508 / S288c) GN=HTB2 PE=1 SV=2	2	1	1	1	0	6.9	0
20	P02406	16	16	60S ribosomal protein L28	RPL28	>sp|P02406|RL28_YEAST 60S ribosomal protein L28 OS=Saccharomyces cerevisiae (strain ATCC 204508 / S288c) GN=RPL28 PE=1 SV=3	1	16	16	16	10	69.1	51.7
21	P02992	3	3	Elongation factor Tu, mitochondrial	TUF1	>sp|P02992|EFTU_YEAST Elongation factor Tu, mitochondrial OS=Saccharomyces cerevisiae (strain ATCC 204508 / S288c) GN=TUF1 PE=1 SV=1	1	3	3	2	1	6.4	4.1
22	P02994	19	19	Elongation factor 1-alpha	TEF1	>sp|P02994|EF1A_YEAST Elongation factor 1-alpha OS=Saccharomyces cerevisiae (strain ATCC 204508 / S288c) GN=TEF1 PE=1 SV=1	1	19	19	17	18	44.1	44.5
23	P03069	1	1	General control protein GCN4	GCN4	>sp|P03069|GCN4_YEAST General control protein GCN4 OS=Saccharomyces cerevisiae (strain ATCC 204508 / S288c) GN=GCN4 PE=1 SV=1	1	1	1	1	0	3.6	0
24	P03871	4	4	Partitioning protein REP1	REP1	>sp|P03871|REP1_YEAST Partitioning protein REP1 OS=Saccharomyces cerevisiae (strain ATCC 204508 / S288c) GN=REP1 PE=1 SV=1	1	4	4	1	3	2.1	11
25	P03872	2	2	Partitioning protein REP2	REP2	>sp|P03872|REP2_YEAST Partitioning protein REP2 OS=Saccharomyces cerevisiae (strain ATCC 204508 / S288c) GN=REP2 PE=1 SV=1	1	2	2	2	0	8.4	0
26	P03878	1	1	Intron-encoded DNA endonuclease aI4;Truncated non-functional cytochrome oxidase 1;DNA endonuclease aI4	aI4	>sp|P03878|SCE2_YEAST Intron-encoded DNA endonuclease aI4 OS=Saccharomyces cerevisiae (strain ATCC 204508 / S288c) GN=aI4 PE=1 SV=3	1	1	1	0	1	0	2.2
27	P04147	1	1	Polyadenylate-binding protein, cytoplasmic and nuclear	PAB1	>sp|P04147|PABP_YEAST Polyadenylate-binding protein, cytoplasmic and nuclear OS=Saccharomyces cerevisiae (strain ATCC 204508 / S288c) GN=PAB1 PE=1 SV=4	1	1	1	1	0	1.6	0
28	P04710	3	1	ADP,ATP carrier protein 1	AAC1	>sp|P04710|ADT1_YEAST ADP,ATP carrier protein 1 OS=Saccharomyces cerevisiae (strain ATCC 204508 / S288c) GN=AAC1 PE=1 SV=1	1	3	1	3	3	8.1	8.1
29	P04786	6	6	DNA topoisomerase 1	TOP1	>sp|P04786|TOP1_YEAST DNA topoisomerase 1 OS=Saccharomyces cerevisiae (strain ATCC 204508 / S288c) GN=TOP1 PE=1 SV=2	1	6	6	5	1	7.3	0.8
30	P04801	14	14	Threonine--tRNA ligase, cytoplasmic	THS1	>sp|P04801|SYTC_YEAST Threonine--tRNA ligase, cytoplasmic OS=Saccharomyces cerevisiae (strain ATCC 204508 / S288c) GN=THS1 PE=1 SV=2	1	14	14	3	13	4	21
31	P04802	31	31	Aspartate--tRNA ligase, cytoplasmic	DPS1	>sp|P04802|SYDC_YEAST Aspartate--tRNA ligase, cytoplasmic OS=Saccharomyces cerevisiae (strain ATCC 204508 / S288c) GN=DPS1 PE=1 SV=3	1	31	31	24	30	49.7	58.5
32	P19657;P05030	8;8	8;8	Plasma membrane ATPase 2;Plasma membrane ATPase 1	PMA2;PMA1	>sp|P19657|PMA2_YEAST Plasma membrane ATPase 2 OS=Saccharomyces cerevisiae (strain ATCC 204508 / S288c) GN=PMA2 PE=1 SV=3;>sp|P05030|PMA1_YEAST Plasma membrane ATPase 1 OS=Saccharomyces cerevisiae (strain ATCC 204508 / S288c) GN=PMA1 PE=1 SV=2	2	8	8	0	8	0	10.2
33	P05737;Q12213	6;6	6;6	60S ribosomal protein L7-A;60S ribosomal protein L7-B	RPL7A;RPL7B	>sp|P05737|RL7A_YEAST 60S ribosomal protein L7-A OS=Saccharomyces cerevisiae (strain ATCC 204508 / S288c) GN=RPL7A PE=1 SV=3;>sp|Q12213|RL7B_YEAST 60S ribosomal protein L7-B OS=Saccharomyces cerevisiae (strain ATCC 204508 / S288c) GN=RPL7B PE=1 SV=3	2	6	6	0	6	0	18.4
34	P05748	9	1	60S ribosomal protein L15-A	RPL15A	>sp|P05748|RL15A_YEAST 60S ribosomal protein L15-A OS=Saccharomyces cerevisiae (strain ATCC 204508 / S288c) GN=RPL15A PE=1 SV=3	1	9	1	9	8	36.3	35.3
35	P05756	4	4	40S ribosomal protein S13	RPS13	>sp|P05756|RS13_YEAST 40S ribosomal protein S13 OS=Saccharomyces cerevisiae (strain ATCC 204508 / S288c) GN=RPS13 PE=1 SV=3	1	4	4	1	4	7.9	25.8
36	P05759;P0CG63;P0CH08;P0CH09	10;7;7;7	10;7;7;7	Ubiquitin-40S ribosomal protein S31;Ubiquitin;40S ribosomal protein S31;Polyubiquitin;Ubiquitin;Ubiquitin-60S ribosomal protein L40;Ubiquitin;60S ribosomal protein L40	RPS31;UBI4;RPL40A;RPL40B	>sp|P05759|RS27A_YEAST Ubiquitin-40S ribosomal protein S31 OS=Saccharomyces cerevisiae (strain ATCC 204508 / S288c) GN=RPS31 PE=1 SV=3;>sp|P0CG63|UBI4P_YEAST Polyubiquitin OS=Saccharomyces cerevisiae (strain ATCC 204508 / S288c) GN=UBI4 PE=1 SV=1;>sp|P0CH0	4	10	10	10	9	56.6	55.3
37	P06106	31	31	Protein MET17;O-acetylhomoserine sulfhydrylase;O-acetylserine sulfhydrylase	MET17	>sp|P06106|MET17_YEAST Protein MET17 OS=Saccharomyces cerevisiae (strain ATCC 204508 / S288c) GN=MET17 PE=1 SV=3	1	31	31	31	1	64	1.8
38	P06115	1	1	Catalase T	CTT1	>sp|P06115|CATT_YEAST Catalase T OS=Saccharomyces cerevisiae (strain ATCC 204508 / S288c) GN=CTT1 PE=1 SV=3	1	1	1	0	1	0	2.7
39	P06169	18;1	16;0	Pyruvate decarboxylase isozyme 1	PDC1	>sp|P06169|PDC1_YEAST Pyruvate decarboxylase isozyme 1 OS=Saccharomyces cerevisiae (strain ATCC 204508 / S288c) GN=PDC1 PE=1 SV=7	2	18	16	13	18	30.9	38.9
40	P06197	1	1	CDP-diacylglycerol--inositol 3-phosphatidyltransferase	PIS1	>sp|P06197|PIS_YEAST CDP-diacylglycerol--inositol 3-phosphatidyltransferase OS=Saccharomyces cerevisiae (strain ATCC 204508 / S288c) GN=PIS1 PE=1 SV=1	1	1	1	0	1	0	5
41	P06245	2	2	cAMP-dependent protein kinase type 2	TPK2	>sp|P06245|KAPB_YEAST cAMP-dependent protein kinase type 2 OS=Saccharomyces cerevisiae (strain ATCC 204508 / S288c) GN=TPK2 PE=1 SV=2	1	2	2	1	2	2.4	5.5
42	P06633	4	4	Imidazoleglycerol-phosphate dehydratase	HIS3	>sp|P06633|HIS7_YEAST Imidazoleglycerol-phosphate dehydratase OS=Saccharomyces cerevisiae (strain ATCC 204508 / S288c) GN=HIS3 PE=1 SV=2	1	4	4	4	0	25.9	0
43	P06738	14	14	Glycogen phosphorylase	GPH1	>sp|P06738|PHSG_YEAST Glycogen phosphorylase OS=Saccharomyces cerevisiae (strain ATCC 204508 / S288c) GN=GPH1 PE=1 SV=4	1	14	14	0	14	0	20.8
44	P06776	20	20	3,5-cyclic-nucleotide phosphodiesterase 2	PDE2	>sp|P06776|PDE2_YEAST 3,5-cyclic-nucleotide phosphodiesterase 2 OS=Saccharomyces cerevisiae (strain ATCC 204508 / S288c) GN=PDE2 PE=1 SV=2	1	20	20	19	13	41.4	24.5
45	P06782	59	59	Carbon catabolite-derepressing protein kinase	SNF1	>sp|P06782|SNF1_YEAST Carbon catabolite-derepressing protein kinase OS=Saccharomyces cerevisiae (strain ATCC 204508 / S288c) GN=SNF1 PE=1 SV=1	1	59	59	48	59	70	83.6
46	P07143	8	8	Cytochrome c1, heme protein, mitochondrial	CYT1	>sp|P07143|CY1_YEAST Cytochrome c1, heme protein, mitochondrial OS=Saccharomyces cerevisiae (strain ATCC 204508 / S288c) GN=CYT1 PE=1 SV=1	1	8	8	5	8	28.2	36.6
47	P07149	3	3	Fatty acid synthase subunit beta;3-hydroxypalmitoyl-[acyl-carrier-protein] dehydratase;Enoyl-[acyl-carrier-protein] reductase [NADH];[Acyl-carrier-protein] acetyltransferase;[Acyl-carrier-protein] malonyltransferase;S-acyl fatty acid synthase thioesterase	FAS1	>sp|P07149|FAS1_YEAST Fatty acid synthase subunit beta OS=Saccharomyces cerevisiae (strain ATCC 204508 / S288c) GN=FAS1 PE=1 SV=2	1	3	3	0	3	0	2.1
48	P07252	1	1	Cytochrome B pre-mRNA-processing protein 1	CBP1	>sp|P07252|CBP1_YEAST Cytochrome B pre-mRNA-processing protein 1 OS=Saccharomyces cerevisiae (strain ATCC 204508 / S288c) GN=CBP1 PE=1 SV=1	1	1	1	1	0	2	0
49	P07253	1	1	Cytochrome B pre-mRNA-processing protein 6	CBP6	>sp|P07253|CBP6_YEAST Cytochrome B pre-mRNA-processing protein 6 OS=Saccharomyces cerevisiae (strain ATCC 204508 / S288c) GN=CBP6 PE=1 SV=1	1	1	1	1	0	6.2	0
50	P07259	4	4	Protein URA2;Glutamine-dependent carbamoyl-phosphate synthase;Aspartate carbamoyltransferase	URA2	>sp|P07259|PYR1_YEAST Protein URA2 OS=Saccharomyces cerevisiae (strain ATCC 204508 / S288c) GN=URA2 PE=1 SV=5	1	4	4	1	3	0.8	1.9
51	P07262	1	1	NADP-specific glutamate dehydrogenase 1	GDH1	>sp|P07262|DHE4_YEAST NADP-specific glutamate dehydrogenase 1 OS=Saccharomyces cerevisiae (strain ATCC 204508 / S288c) GN=GDH1 PE=1 SV=2	1	1	1	0	1	0	4.4
52	P07285	3	3	Anthranilate phosphoribosyltransferase	TRP4	>sp|P07285|TRPD_YEAST Anthranilate phosphoribosyltransferase OS=Saccharomyces cerevisiae (strain ATCC 204508 / S288c) GN=TRP4 PE=1 SV=1	1	3	3	3	0	9.5	0
53	P07342	12	12	Acetolactate synthase catalytic subunit, mitochondrial	ILV2	>sp|P07342|ILVB_YEAST Acetolactate synthase catalytic subunit, mitochondrial OS=Saccharomyces cerevisiae (strain ATCC 204508 / S288c) GN=ILV2 PE=1 SV=1	1	12	12	11	5	22.3	9.5
54	P07702	3	3	L-aminoadipate-semialdehyde dehydrogenase	LYS2	>sp|P07702|LYS2_YEAST L-aminoadipate-semialdehyde dehydrogenase OS=Saccharomyces cerevisiae (strain ATCC 204508 / S288c) GN=LYS2 PE=1 SV=2	1	3	3	1	2	0.6	1.4
55	P07806;P07806-2	5;5	5;5	Valine--tRNA ligase, mitochondrial	VAS1	>sp|P07806|SYV_YEAST Valine--tRNA ligase, mitochondrial OS=Saccharomyces cerevisiae (strain ATCC 204508 / S288c) GN=VAS1 PE=1 SV=2;>sp|P07806-2|SYV_YEAST Isoform Cytoplasmic of Valine--tRNA ligase, mitochondrial OS=Saccharomyces cerevisiae (strain ATCC 204	2	5	5	0	5	0	5
56	P07834;P40042	1;1	1;1	Cell division control protein 4;Regulator of rDNA transcription protein 13	CDC4;RRT13	>sp|P07834|CDC4_YEAST Cell division control protein 4 OS=Saccharomyces cerevisiae (strain ATCC 204508 / S288c) GN=CDC4 PE=1 SV=2;>sp|P40042|RRT13_YEAST Regulator of rDNA transcription protein 13 OS=Saccharomyces cerevisiae (strain ATCC 204508 / S288c) GN=R	2	1	1	1	0	1.4	0
57	P07991	37	37	Ornithine aminotransferase	CAR2	>sp|P07991|OAT_YEAST Ornithine aminotransferase OS=Saccharomyces cerevisiae (strain ATCC 204508 / S288c) GN=CAR2 PE=1 SV=2	1	37	37	37	36	93.6	93.6
58	P08019	1	1	Glucoamylase, intracellular sporulation-specific	SGA1	>sp|P08019|AMYG_YEAST Glucoamylase, intracellular sporulation-specific OS=Saccharomyces cerevisiae (strain ATCC 204508 / S288c) GN=SGA1 PE=2 SV=2	1	1	1	0	1	0	4
59	P08518	13	13	DNA-directed RNA polymerase II subunit RPB2	RPB2	>sp|P08518|RPB2_YEAST DNA-directed RNA polymerase II subunit RPB2 OS=Saccharomyces cerevisiae (strain ATCC 204508 / S288c) GN=RPB2 PE=1 SV=2	1	13	13	2	12	1.6	12.7
60	P08640	1	1	Flocculation protein FLO11	MUC1	>sp|P08640|MUC1_YEAST Flocculation protein FLO11 OS=Saccharomyces cerevisiae (strain ATCC 204508 / S288c) GN=MUC1 PE=1 SV=2	1	1	1	1	0	1.1	0
61	P08678	104	104	Adenylate cyclase	CYR1	>sp|P08678|CYAA_YEAST Adenylate cyclase OS=Saccharomyces cerevisiae (strain ATCC 204508 / S288c) GN=CYR1 PE=1 SV=2	1	104	104	74	103	44	57.4
62	P09232	6	6	Cerevisin	PRB1	>sp|P09232|PRTB_YEAST Cerevisin OS=Saccharomyces cerevisiae (strain ATCC 204508 / S288c) GN=PRB1 PE=1 SV=1	1	6	6	6	0	8.8	0
63	P09440	5	5	C-1-tetrahydrofolate synthase, mitochondrial;Methylenetetrahydrofolate dehydrogenase;Methenyltetrahydrofolate cyclohydrolase;Formyltetrahydrofolate synthetase	MIS1	>sp|P09440|C1TM_YEAST C-1-tetrahydrofolate synthase, mitochondrial OS=Saccharomyces cerevisiae (strain ATCC 204508 / S288c) GN=MIS1 PE=1 SV=1	1	5	5	0	5	0	6.6
64	P09624	23	23	Dihydrolipoyl dehydrogenase, mitochondrial	LPD1	>sp|P09624|DLDH_YEAST Dihydrolipoyl dehydrogenase, mitochondrial OS=Saccharomyces cerevisiae (strain ATCC 204508 / S288c) GN=LPD1 PE=1 SV=1	1	23	23	20	16	44.5	40.9
65	P09938	10	10	Ribonucleoside-diphosphate reductase small chain 1	RNR2	>sp|P09938|RIR2_YEAST Ribonucleoside-diphosphate reductase small chain 1 OS=Saccharomyces cerevisiae (strain ATCC 204508 / S288c) GN=RNR2 PE=1 SV=2	1	10	10	8	7	23.8	17.8
66	P09950	9	9	5-aminolevulinate synthase, mitochondrial	HEM1	>sp|P09950|HEM1_YEAST 5-aminolevulinate synthase, mitochondrial OS=Saccharomyces cerevisiae (strain ATCC 204508 / S288c) GN=HEM1 PE=1 SV=1	1	9	9	9	3	21.9	4.7
67	P0C1V3	1	1	Putative uncharacterized protein YAL016C-B	YAL016C-B	>sp|P0C1V3|YA016_YEAST Putative uncharacterized protein YAL016C-B OS=Saccharomyces cerevisiae (strain ATCC 204508 / S288c) GN=YAL016C-B PE=5 SV=1	1	1	1	0	1	0	18
68	P0C2H6;P0C2H7	9;9	9;9	60S ribosomal protein L27-A;60S ribosomal protein L27-B	RPL27A;RPL27B	>sp|P0C2H6|RL27A_YEAST 60S ribosomal protein L27-A OS=Saccharomyces cerevisiae (strain ATCC 204508 / S288c) GN=RPL27A PE=1 SV=1;>sp|P0C2H7|RL27B_YEAST 60S ribosomal protein L27-B OS=Saccharomyces cerevisiae (strain ATCC 204508 / S288c) GN=RPL27B PE=1 SV=1	2	9	9	9	6	57.4	39.7
69	P0CE41	2	2	Heme-responsive zinc finger transcription factor HAP1	HAP1	>sp|P0CE41|HAP1_YEAST Heme-responsive zinc finger transcription factor HAP1 OS=Saccharomyces cerevisiae (strain ATCC 204508 / S288c) GN=HAP1 PE=1 SV=1	1	2	2	2	0	2.3	0
70	P0CE99	1	1	Putative uncharacterized protein YLR157W-D	YLR157W-D	>sp|P0CE99|YL57D_YEAST Putative uncharacterized protein YLR157W-D OS=Saccharomyces cerevisiae (strain ATCC 204508 / S288c) GN=YLR157W-D PE=2 SV=1	1	1	1	1	0	24.3	0
71	P0CF34	1	1	Putative guanine nucleotide exchange factor YLL017W		>sp|P0CF34|YL017_YEAST Putative guanine nucleotide exchange factor YLL017W OS=Saccharomyces cerevisiae (strain ATCC 204508 / S288c) GN=YLL017W PE=5 SV=1	1	1	1	0	1	0	1
72	P0CX23;P0CX24	11;11	11;11	60S ribosomal protein L20-A;60S ribosomal protein L20-B	RPL20A;RPL20B	>sp|P0CX23|RL20A_YEAST 60S ribosomal protein L20-A OS=Saccharomyces cerevisiae (strain ATCC 204508 / S288c) GN=RPL20A PE=1 SV=1;>sp|P0CX24|RL20B_YEAST 60S ribosomal protein L20-B OS=Saccharomyces cerevisiae (strain ATCC 204508 / S288c) GN=RPL20B PE=1 SV=1	2	11	11	9	9	43.6	49.4
73	P0CX35;P0CX36	27;27	27;27	40S ribosomal protein S4-A;40S ribosomal protein S4-B	RPS4A;RPS4B	>sp|P0CX35|RS4A_YEAST 40S ribosomal protein S4-A OS=Saccharomyces cerevisiae (strain ATCC 204508 / S288c) GN=RPS4A PE=1 SV=1;>sp|P0CX36|RS4B_YEAST 40S ribosomal protein S4-B OS=Saccharomyces cerevisiae (strain ATCC 204508 / S288c) GN=RPS4B PE=1 SV=1	2	27	27	27	21	77.4	69.3
74	P0CX37;P0CX38	2;2	2;2	40S ribosomal protein S6-A;40S ribosomal protein S6-B	RPS6A;RPS6B	>sp|P0CX37|RS6A_YEAST 40S ribosomal protein S6-A OS=Saccharomyces cerevisiae (strain ATCC 204508 / S288c) GN=RPS6A PE=1 SV=1;>sp|P0CX38|RS6B_YEAST 40S ribosomal protein S6-B OS=Saccharomyces cerevisiae (strain ATCC 204508 / S288c) GN=RPS6B PE=1 SV=1	2	2	2	1	1	3	5.1
75	P0CX39;P0CX40	6;6	6;6	40S ribosomal protein S8-A;40S ribosomal protein S8-B	RPS8A;RPS8B	>sp|P0CX39|RS8A_YEAST 40S ribosomal protein S8-A OS=Saccharomyces cerevisiae (strain ATCC 204508 / S288c) GN=RPS8A PE=1 SV=1;>sp|P0CX40|RS8B_YEAST 40S ribosomal protein S8-B OS=Saccharomyces cerevisiae (strain ATCC 204508 / S288c) GN=RPS8B PE=1 SV=1	2	6	6	5	3	33.5	19
76	P0CX43;P0CX44	2;2	2;2	60S ribosomal protein L1-A;60S ribosomal protein L1-B	RPL1A;RPL1B	>sp|P0CX43|RL1A_YEAST 60S ribosomal protein L1-A OS=Saccharomyces cerevisiae (strain ATCC 204508 / S288c) GN=RPL1A PE=1 SV=1;>sp|P0CX44|RL1B_YEAST 60S ribosomal protein L1-B OS=Saccharomyces cerevisiae (strain ATCC 204508 / S288c) GN=RPL1B PE=1 SV=1	2	2	2	0	2	0	12.4
77	P0CX45;P0CX46	19;19	19;19	60S ribosomal protein L2-A;60S ribosomal protein L2-B	RPL2A;RPL2B	>sp|P0CX45|RL2A_YEAST 60S ribosomal protein L2-A OS=Saccharomyces cerevisiae (strain ATCC 204508 / S288c) GN=RPL2A PE=1 SV=1;>sp|P0CX46|RL2B_YEAST 60S ribosomal protein L2-B OS=Saccharomyces cerevisiae (strain ATCC 204508 / S288c) GN=RPL2B PE=1 SV=1	2	19	19	19	13	65.7	54.3
78	P0CX47;P0CX48	4;4	4;4	40S ribosomal protein S11-A;40S ribosomal protein S11-B	RPS11A;RPS11B	>sp|P0CX47|RS11A_YEAST 40S ribosomal protein S11-A OS=Saccharomyces cerevisiae (strain ATCC 204508 / S288c) GN=RPS11A PE=1 SV=1;>sp|P0CX48|RS11B_YEAST 40S ribosomal protein S11-B OS=Saccharomyces cerevisiae (strain ATCC 204508 / S288c) GN=RPS11B PE=1 SV=1	2	4	4	4	3	31.4	24.4
79	P0CX49;P0CX50	14;14	13;13	60S ribosomal protein L18-A;60S ribosomal protein L18-B	RPL18A;RPL18B	>sp|P0CX49|RL18A_YEAST 60S ribosomal protein L18-A OS=Saccharomyces cerevisiae (strain ATCC 204508 / S288c) GN=RPL18A PE=1 SV=1;>sp|P0CX50|RL18B_YEAST 60S ribosomal protein L18-B OS=Saccharomyces cerevisiae (strain ATCC 204508 / S288c) GN=RPL18B PE=1 SV=1	2	14	13	12	12	52.2	49.5
80	P0CX55;P0CX56	8;8	8;8	40S ribosomal protein S18-A;40S ribosomal protein S18-B	RPS18A;RPS18B	>sp|P0CX55|RS18A_YEAST 40S ribosomal protein S18-A OS=Saccharomyces cerevisiae (strain ATCC 204508 / S288c) GN=RPS18A PE=1 SV=1;>sp|P0CX56|RS18B_YEAST 40S ribosomal protein S18-B OS=Saccharomyces cerevisiae (strain ATCC 204508 / S288c) GN=RPS18B PE=1 SV=1	2	8	8	8	6	57.5	48.6
81	P0CX82;P0CX83	11;11	11;11	60S ribosomal protein L19-A;60S ribosomal protein L19-B	RPL19A;RPL19B	>sp|P0CX82|RL19A_YEAST 60S ribosomal protein L19-A OS=Saccharomyces cerevisiae (strain ATCC 204508 / S288c) GN=RPL19A PE=1 SV=1;>sp|P0CX83|RL19B_YEAST 60S ribosomal protein L19-B OS=Saccharomyces cerevisiae (strain ATCC 204508 / S288c) GN=RPL19B PE=1 SV=1	2	11	11	11	8	40.2	34.4
82	P10591;P22202;P10592;P16474;P09435	3;3;3;2;2;1;1	3;3;3;2;2;1;1	Heat shock protein SSA1;Heat shock protein SSA4;Heat shock protein SSA2;78 kDa glucose-regulated protein homolog;Heat shock protein SSA3	SSA1;SSA4;SSA2;KAR2;SSA3	>sp|P10591|HSP71_YEAST Heat shock protein SSA1 OS=Saccharomyces cerevisiae (strain ATCC 204508 / S288c) GN=SSA1 PE=1 SV=4;>sp|P22202|HSP74_YEAST Heat shock protein SSA4 OS=Saccharomyces cerevisiae (strain ATCC 204508 / S288c) GN=SSA4 PE=1 SV=3;>sp|P10592|H	7	3	3	1	2	1.1	4.5
83	P10614	7	7	Lanosterol 14-alpha demethylase	ERG11	>sp|P10614|CP51_YEAST Lanosterol 14-alpha demethylase OS=Saccharomyces cerevisiae (strain ATCC 204508 / S288c) GN=ERG11 PE=1 SV=1	1	7	7	5	7	12.5	17.5
84	P10664;P49626	8;8	8;8	60S ribosomal protein L4-A;60S ribosomal protein L4-B	RPL4A;RPL4B	>sp|P10664|RL4A_YEAST 60S ribosomal protein L4-A OS=Saccharomyces cerevisiae (strain ATCC 204508 / S288c) GN=RPL4A PE=1 SV=4;>sp|P49626|RL4B_YEAST 60S ribosomal protein L4-B OS=Saccharomyces cerevisiae (strain ATCC 204508 / S288c) GN=RPL4B PE=1 SV=2	2	8	8	8	5	32.6	23.8
85	P10849	1	1	Mitochondrial transcription factor 2	MTF2	>sp|P10849|MTF2_YEAST Mitochondrial transcription factor 2 OS=Saccharomyces cerevisiae (strain ATCC 204508 / S288c) GN=MTF2 PE=1 SV=1	1	1	1	1	0	3.4	0
86	P10963	11	11	Phosphoenolpyruvate carboxykinase [ATP]	PCK1	>sp|P10963|PCKA_YEAST Phosphoenolpyruvate carboxykinase [ATP] OS=Saccharomyces cerevisiae (strain ATCC 204508 / S288c) GN=PCK1 PE=1 SV=2	1	11	11	0	11	0	27.5
87	P10964	2	2	DNA-directed RNA polymerase I subunit RPA190	RPA190	>sp|P10964|RPA1_YEAST DNA-directed RNA polymerase I subunit RPA190 OS=Saccharomyces cerevisiae (strain ATCC 204508 / S288c) GN=RPA190 PE=1 SV=2	1	2	2	0	2	0	1.4
88	P11154	44	9	Pyruvate carboxylase 1	PYC1	>sp|P11154|PYC1_YEAST Pyruvate carboxylase 1 OS=Saccharomyces cerevisiae (strain ATCC 204508 / S288c) GN=PYC1 PE=1 SV=2	1	44	9	41	37	38.5	36
89	P11433	6	6	Cell division control protein 24	CDC24	>sp|P11433|CDC24_YEAST Cell division control protein 24 OS=Saccharomyces cerevisiae (strain ATCC 204508 / S288c) GN=CDC24 PE=1 SV=2	1	6	6	6	0	8.5	0
90	P11491	22	21	Repressible alkaline phosphatase;Soluble alkaline phosphatase	PHO8	>sp|P11491|PPB_YEAST Repressible alkaline phosphatase OS=Saccharomyces cerevisiae (strain ATCC 204508 / S288c) GN=PHO8 PE=1 SV=2	1	22	21	22	14	49.8	32
91	P11792	33	33	Serine/threonine-protein kinase SCH9	SCH9	>sp|P11792|SCH9_YEAST Serine/threonine-protein kinase SCH9 OS=Saccharomyces cerevisiae (strain ATCC 204508 / S288c) GN=SCH9 PE=1 SV=3	1	33	33	32	32	46.4	43.1
92	P11927	1	1	Cell division control protein KAR1	KAR1	>sp|P11927|KAR1_YEAST Cell division control protein KAR1 OS=Saccharomyces cerevisiae (strain ATCC 204508 / S288c) GN=KAR1 PE=1 SV=2	1	1	1	0	1	0	3.5
93	P11938	4	4	DNA-binding protein RAP1	RAP1	>sp|P11938|RAP1_YEAST DNA-binding protein RAP1 OS=Saccharomyces cerevisiae (strain ATCC 204508 / S288c) GN=RAP1 PE=1 SV=2	1	4	4	4	0	6.7	0
94	P12684	1	1	3-hydroxy-3-methylglutaryl-coenzyme A reductase 2	HMG2	>sp|P12684|HMDH2_YEAST 3-hydroxy-3-methylglutaryl-coenzyme A reductase 2 OS=Saccharomyces cerevisiae (strain ATCC 204508 / S288c) GN=HMG2 PE=1 SV=1	1	1	1	1	0	1.4	0
95	P12688	9	1	Serine/threonine-protein kinase YPK1	YPK1	>sp|P12688|YPK1_YEAST Serine/threonine-protein kinase YPK1 OS=Saccharomyces cerevisiae (strain ATCC 204508 / S288c) GN=YPK1 PE=1 SV=2	1	9	1	9	7	13.5	8.1
96	P12709	13	13	Glucose-6-phosphate isomerase	PGI1	>sp|P12709|G6PI_YEAST Glucose-6-phosphate isomerase OS=Saccharomyces cerevisiae (strain ATCC 204508 / S288c) GN=PGI1 PE=1 SV=3	1	13	13	9	13	20	30.3
97	P12962	5	5	Cap-associated protein CAF20	CAF20	>sp|P12962|CAF20_YEAST Cap-associated protein CAF20 OS=Saccharomyces cerevisiae (strain ATCC 204508 / S288c) GN=CAF20 PE=1 SV=2	1	5	5	5	3	50.3	27.3
98	P13134	1	1	Kexin	KEX2	>sp|P13134|KEX2_YEAST Kexin OS=Saccharomyces cerevisiae (strain ATCC 204508 / S288c) GN=KEX2 PE=1 SV=1	1	1	1	1	0	1.8	0
99	P13185	1	1	Serine/threonine protein kinase KIN1	KIN1	>sp|P13185|KIN1_YEAST Serine/threonine protein kinase KIN1 OS=Saccharomyces cerevisiae (strain ATCC 204508 / S288c) GN=KIN1 PE=1 SV=3	1	1	1	1	1	0.7	0.7
100	P14020	5	5	Dolichol-phosphate mannosyltransferase	DPM1	>sp|P14020|DPM1_YEAST Dolichol-phosphate mannosyltransferase OS=Saccharomyces cerevisiae (strain ATCC 204508 / S288c) GN=DPM1 PE=1 SV=3	1	5	5	1	5	3	17.2
101	P14064	1	1	Transcriptional activator HAP4	HAP4	>sp|P14064|HAP4_YEAST Transcriptional activator HAP4 OS=Saccharomyces cerevisiae (strain ATCC 204508 / S288c) GN=HAP4 PE=1 SV=2	1	1	1	1	1	1.1	1.1
102	P14126	37	37	60S ribosomal protein L3	RPL3	>sp|P14126|RL3_YEAST 60S ribosomal protein L3 OS=Saccharomyces cerevisiae (strain ATCC 204508 / S288c) GN=RPL3 PE=1 SV=4	1	37	37	37	24	64.9	52.7
103	P14164	47	47	ARS-binding factor 1	ABF1	>sp|P14164|ABF1_YEAST ARS-binding factor 1 OS=Saccharomyces cerevisiae (strain ATCC 204508 / S288c) GN=ABF1 PE=1 SV=4	1	47	47	45	39	70.2	67.3
104	P14284	1	1	DNA polymerase zeta catalytic subunit	REV3	>sp|P14284|DPOZ_YEAST DNA polymerase zeta catalytic subunit OS=Saccharomyces cerevisiae (strain ATCC 204508 / S288c) GN=REV3 PE=1 SV=1	1	1	1	1	0	1.7	0
105	P14540	15	15	Fructose-bisphosphate aldolase	FBA1	>sp|P14540|ALF_YEAST Fructose-bisphosphate aldolase OS=Saccharomyces cerevisiae (strain ATCC 204508 / S288c) GN=FBA1 PE=1 SV=3	1	15	15	14	13	42.1	43.7
106	P14741	1	1	Translation initiation factor eIF-2B subunit alpha	GCN3	>sp|P14741|EI2BA_YEAST Translation initiation factor eIF-2B subunit alpha OS=Saccharomyces cerevisiae (strain ATCC 204508 / S288c) GN=GCN3 PE=1 SV=1	1	1	1	1	0	3.9	0
107	P14742	21	21	Glucosamine--fructose-6-phosphate aminotransferase [isomerizing]	GFA1	>sp|P14742|GFA1_YEAST Glucosamine--fructose-6-phosphate aminotransferase [isomerizing] OS=Saccharomyces cerevisiae (strain ATCC 204508 / S288c) GN=GFA1 PE=1 SV=4	1	21	21	16	13	26.6	21.8
108	P14747	1	1	Serine/threonine-protein phosphatase 2B catalytic subunit A2	CMP2	>sp|P14747|PP2B2_YEAST Serine/threonine-protein phosphatase 2B catalytic subunit A2 OS=Saccharomyces cerevisiae (strain ATCC 204508 / S288c) GN=CMP2 PE=1 SV=2	1	1	1	1	0	2.6	0
109	P14832	1	1	Peptidyl-prolyl cis-trans isomerase	CPR1	>sp|P14832|CYPH_YEAST Peptidyl-prolyl cis-trans isomerase OS=Saccharomyces cerevisiae (strain ATCC 204508 / S288c) GN=CPR1 PE=1 SV=3	1	1	1	1	0	6.8	0
110	P15180	8	8	Lysine--tRNA ligase, cytoplasmic	KRS1	>sp|P15180|SYKC_YEAST Lysine--tRNA ligase, cytoplasmic OS=Saccharomyces cerevisiae (strain ATCC 204508 / S288c) GN=KRS1 PE=1 SV=2	1	8	8	0	8	0	15.9
111	P15202	9	9	Peroxisomal catalase A	CTA1	>sp|P15202|CATA_YEAST Peroxisomal catalase A OS=Saccharomyces cerevisiae (strain ATCC 204508 / S288c) GN=CTA1 PE=1 SV=1	1	9	9	9	2	18.4	3.5
112	P15274	63	63	AMP deaminase	AMD1	>sp|P15274|AMPD_YEAST AMP deaminase OS=Saccharomyces cerevisiae (strain ATCC 204508 / S288c) GN=AMD1 PE=1 SV=2	1	63	63	63	50	74.1	62.7
113	P15873	6	6	Proliferating cell nuclear antigen	POL30	>sp|P15873|PCNA_YEAST Proliferating cell nuclear antigen OS=Saccharomyces cerevisiae (strain ATCC 204508 / S288c) GN=POL30 PE=1 SV=1	1	6	6	6	0	22.1	0
114	P15938	1	1	Pre-mRNA-splicing factor ATP-dependent RNA helicase PRP16	PRP16	>sp|P15938|PRP16_YEAST Pre-mRNA-splicing factor ATP-dependent RNA helicase PRP16 OS=Saccharomyces cerevisiae (strain ATCC 204508 / S288c) GN=PRP16 PE=1 SV=2	1	1	1	0	1	0	1
115	P15992	2	2	Heat shock protein 26	HSP26	>sp|P15992|HSP26_YEAST Heat shock protein 26 OS=Saccharomyces cerevisiae (strain ATCC 204508 / S288c) GN=HSP26 PE=1 SV=3	1	2	2	0	2	0	15.9
116	P16521	36	24	Elongation factor 3A	YEF3	>sp|P16521|EF3A_YEAST Elongation factor 3A OS=Saccharomyces cerevisiae (strain ATCC 204508 / S288c) GN=YEF3 PE=1 SV=4	1	36	24	7	36	8	38.9
117	P16547	6	6	Mitochondrial outer membrane protein OM45	OM45	>sp|P16547|OM45_YEAST Mitochondrial outer membrane protein OM45 OS=Saccharomyces cerevisiae (strain ATCC 204508 / S288c) GN=OM45 PE=1 SV=2	1	6	6	1	6	3.6	18.6
118	P16649	12	12	General transcriptional corepressor TUP1	TUP1	>sp|P16649|TUP1_YEAST General transcriptional corepressor TUP1 OS=Saccharomyces cerevisiae (strain ATCC 204508 / S288c) GN=TUP1 PE=1 SV=2	1	12	12	12	0	18.9	0
119	P16861	12;1	12;1	6-phosphofructokinase subunit alpha	PFK1	>sp|P16861|K6PF1_YEAST 6-phosphofructokinase subunit alpha OS=Saccharomyces cerevisiae (strain ATCC 204508 / S288c) GN=PFK1 PE=1 SV=1	2	12	12	0	12	0	15.1
120	P17157	4	4	Cyclin-dependent protein kinase PHO85	PHO85	>sp|P17157|PHO85_YEAST Cyclin-dependent protein kinase PHO85 OS=Saccharomyces cerevisiae (strain ATCC 204508 / S288c) GN=PHO85 PE=1 SV=2	1	4	4	4	3	11.5	7.9
121	P17255	4	4	V-type proton ATPase catalytic subunit A;Endonuclease PI-SceI	VMA1	>sp|P17255|VATA_YEAST V-type proton ATPase catalytic subunit A OS=Saccharomyces cerevisiae (strain ATCC 204508 / S288c) GN=VMA1 PE=1 SV=3	1	4	4	0	4	0	4
122	P17695	5	5	Glutaredoxin-2, mitochondrial	GRX2	>sp|P17695|GLRX2_YEAST Glutaredoxin-2, mitochondrial OS=Saccharomyces cerevisiae (strain ATCC 204508 / S288c) GN=GRX2 PE=1 SV=3	1	5	5	1	5	7	40.6
123	P18239	14;4	12;2	ADP,ATP carrier protein 2	PET9	>sp|P18239|ADT2_YEAST ADP,ATP carrier protein 2 OS=Saccharomyces cerevisiae (strain ATCC 204508 / S288c) GN=PET9 PE=1 SV=2	2	14	12	10	14	29.9	32.4
124	P18412	9	8	Ty transcription activator TEC1	TEC1	>sp|P18412|TEC1_YEAST Ty transcription activator TEC1 OS=Saccharomyces cerevisiae (strain ATCC 204508 / S288c) GN=TEC1 PE=1 SV=1	1	9	8	9	0	16.9	0
125	P18961	43	35	Serine/threonine-protein kinase YPK2/YKR2	YPK2	>sp|P18961|YPK2_YEAST Serine/threonine-protein kinase YPK2/YKR2 OS=Saccharomyces cerevisiae (strain ATCC 204508 / S288c) GN=YPK2 PE=1 SV=1	1	43	35	43	42	66.8	63.2
126	P19097	3	3	Fatty acid synthase subunit alpha;Acyl carrier;3-oxoacyl-[acyl-carrier-protein] reductase;3-oxoacyl-[acyl-carrier-protein] synthase	FAS2	>sp|P19097|FAS2_YEAST Fatty acid synthase subunit alpha OS=Saccharomyces cerevisiae (strain ATCC 204508 / S288c) GN=FAS2 PE=1 SV=2	1	3	3	1	2	0.4	1.4
127	P19158	14	14	Inhibitory regulator protein IRA2	IRA2	>sp|P19158|IRA2_YEAST Inhibitory regulator protein IRA2 OS=Saccharomyces cerevisiae (strain ATCC 204508 / S288c) GN=IRA2 PE=1 SV=2	1	14	14	7	14	3.5	5.8
128	P19414	6	6	Aconitate hydratase, mitochondrial	ACO1	>sp|P19414|ACON_YEAST Aconitate hydratase, mitochondrial OS=Saccharomyces cerevisiae (strain ATCC 204508 / S288c) GN=ACO1 PE=1 SV=2	1	6	6	0	6	0	8.9
129	P19524	2	2	Myosin-2	MYO2	>sp|P19524|MYO2_YEAST Myosin-2 OS=Saccharomyces cerevisiae (strain ATCC 204508 / S288c) GN=MYO2 PE=1 SV=1	1	2	2	1	1	0.9	0.7
130	P20095	1	1	Pre-mRNA-splicing factor ATP-dependent RNA helicase-like protein PRP2	PRP2	>sp|P20095|PRP2_YEAST Pre-mRNA-splicing factor ATP-dependent RNA helicase-like protein PRP2 OS=Saccharomyces cerevisiae (strain ATCC 204508 / S288c) GN=PRP2 PE=1 SV=1	1	1	1	0	1	0	1.4
131	P20107	12	12	Zinc/cadmium resistance protein	ZRC1	>sp|P20107|ZRC1_YEAST Zinc/cadmium resistance protein OS=Saccharomyces cerevisiae (strain ATCC 204508 / S288c) GN=ZRC1 PE=1 SV=2	1	12	12	7	12	29.4	31.7
132	P20447	1	1	ATP-dependent RNA helicase DBP3	DBP3	>sp|P20447|DBP3_YEAST ATP-dependent RNA helicase DBP3 OS=Saccharomyces cerevisiae (strain ATCC 204508 / S288c) GN=DBP3 PE=1 SV=2	1	1	1	1	0	3.3	0
133	P20484	1	1	Protein MAK11	MAK11	>sp|P20484|MAK11_YEAST Protein MAK11 OS=Saccharomyces cerevisiae (strain ATCC 204508 / S288c) GN=MAK11 PE=1 SV=1	1	1	1	1	0	3	0
134	P20486	5	5	Cyclin-dependent kinases regulatory subunit	CKS1	>sp|P20486|CKS1_YEAST Cyclin-dependent kinases regulatory subunit OS=Saccharomyces cerevisiae (strain ATCC 204508 / S288c) GN=CKS1 PE=1 SV=1	1	5	5	5	2	36.7	18.7
135	P20795	1	1	Vacuolar protein sorting-associated protein 33	VPS33	>sp|P20795|VPS33_YEAST Vacuolar protein sorting-associated protein 33 OS=Saccharomyces cerevisiae (strain ATCC 204508 / S288c) GN=VPS33 PE=1 SV=1	1	1	1	0	1	0	1.6
136	P20967	35	35	2-oxoglutarate dehydrogenase, mitochondrial	KGD1	>sp|P20967|ODO1_YEAST 2-oxoglutarate dehydrogenase, mitochondrial OS=Saccharomyces cerevisiae (strain ATCC 204508 / S288c) GN=KGD1 PE=1 SV=2	1	35	35	32	24	37.2	33.9
137	P21147	6	6	Acyl-CoA desaturase 1	OLE1	>sp|P21147|ACO1_YEAST Acyl-CoA desaturase 1 OS=Saccharomyces cerevisiae (strain ATCC 204508 / S288c) GN=OLE1 PE=1 SV=2	1	6	6	3	6	7.5	11.8
138	P21192	1	1	Metallothionein expression activator	ACE2	>sp|P21192|ACE2_YEAST Metallothionein expression activator OS=Saccharomyces cerevisiae (strain ATCC 204508 / S288c) GN=ACE2 PE=1 SV=1	1	1	1	0	1	0	1
139	P21243	1	1	Proteasome component C7-alpha	SCL1	>sp|P21243|PSA6_YEAST Proteasome component C7-alpha OS=Saccharomyces cerevisiae (strain ATCC 204508 / S288c) GN=SCL1 PE=1 SV=1	1	1	1	0	1	0	5.6
140	P21264	1	1	Phosphoribosylaminoimidazole carboxylase	ADE2	>sp|P21264|PUR6_YEAST Phosphoribosylaminoimidazole carboxylase OS=Saccharomyces cerevisiae (strain ATCC 204508 / S288c) GN=ADE2 PE=1 SV=1	1	1	1	1	0	3	0
141	P21304	1	1	Periodic tryptophan protein 1	PWP1	>sp|P21304|PWP1_YEAST Periodic tryptophan protein 1 OS=Saccharomyces cerevisiae (strain ATCC 204508 / S288c) GN=PWP1 PE=1 SV=1	1	1	1	0	1	0	2.3
142	P21538	18	18	DNA-binding protein REB1	REB1	>sp|P21538|REB1_YEAST DNA-binding protein REB1 OS=Saccharomyces cerevisiae (strain ATCC 204508 / S288c) GN=REB1 PE=1 SV=2	1	18	18	18	1	27.4	3.6
143	P21595	2	2	Cytochrome P450-DIT2	DIT2	>sp|P21595|CP56_YEAST Cytochrome P450-DIT2 OS=Saccharomyces cerevisiae (strain ATCC 204508 / S288c) GN=DIT2 PE=1 SV=2	1	2	2	1	1	2.7	1.2
144	P21827	1	1	Guanine nucleotide exchange factor SRM1	SRM1	>sp|P21827|RCC1_YEAST Guanine nucleotide exchange factor SRM1 OS=Saccharomyces cerevisiae (strain ATCC 204508 / S288c) GN=SRM1 PE=1 SV=1	1	1	1	1	0	3.9	0
145	P22035	5	5	Myb-like DNA-binding protein BAS1	BAS1	>sp|P22035|BAS1_YEAST Myb-like DNA-binding protein BAS1 OS=Saccharomyces cerevisiae (strain ATCC 204508 / S288c) GN=BAS1 PE=1 SV=1	1	5	5	5	0	9.4	0
146	P22138	9	9	DNA-directed RNA polymerase I subunit RPA135	RPA135	>sp|P22138|RPA2_YEAST DNA-directed RNA polymerase I subunit RPA135 OS=Saccharomyces cerevisiae (strain ATCC 204508 / S288c) GN=RPA135 PE=1 SV=1	1	9	9	0	9	0	10.9
147	P22147	25;1	25;1	5-3 exoribonuclease 1	KEM1	>sp|P22147|XRN1_YEAST 5-3 exoribonuclease 1 OS=Saccharomyces cerevisiae (strain ATCC 204508 / S288c) GN=KEM1 PE=1 SV=1	2	25	25	21	11	17.9	9.8
148	P22149	28	28	Iron-regulated transcriptional activator AFT1	AFT1	>sp|P22149|AFT1_YEAST Iron-regulated transcriptional activator AFT1 OS=Saccharomyces cerevisiae (strain ATCC 204508 / S288c) GN=AFT1 PE=1 SV=2	1	28	28	25	26	42.8	41.3
149	P22211	25	25	Nitrogen permease reactivator protein	NPR1	>sp|P22211|NPR1_YEAST Nitrogen permease reactivator protein OS=Saccharomyces cerevisiae (strain ATCC 204508 / S288c) GN=NPR1 PE=1 SV=2	1	25	25	21	23	35.8	40.5
150	P22276	3	3	DNA-directed RNA polymerase III subunit RPC2	RET1	>sp|P22276|RPC2_YEAST DNA-directed RNA polymerase III subunit RPC2 OS=Saccharomyces cerevisiae (strain ATCC 204508 / S288c) GN=RET1 PE=1 SV=2	1	3	3	3	0	3.1	0
151	P22579	2	2	Transcriptional regulatory protein SIN3	SIN3	>sp|P22579|SIN3_YEAST Transcriptional regulatory protein SIN3 OS=Saccharomyces cerevisiae (strain ATCC 204508 / S288c) GN=SIN3 PE=1 SV=2	1	2	2	2	0	1.8	0
152	P22696	1	1	Peptidyl-prolyl cis-trans isomerase ESS1	ESS1	>sp|P22696|ESS1_YEAST Peptidyl-prolyl cis-trans isomerase ESS1 OS=Saccharomyces cerevisiae (strain ATCC 204508 / S288c) GN=ESS1 PE=1 SV=3	1	1	1	1	0	10.6	0
153	P23201	1	1	Protein SPA2	SPA2	>sp|P23201|SPA2_YEAST Protein SPA2 OS=Saccharomyces cerevisiae (strain ATCC 204508 / S288c) GN=SPA2 PE=1 SV=1	1	1	1	1	1	0.8	0.8
154	P23248	16	2	40S ribosomal protein S1-B	RPS1B	>sp|P23248|RS3A2_YEAST 40S ribosomal protein S1-B OS=Saccharomyces cerevisiae (strain ATCC 204508 / S288c) GN=RPS1B PE=1 SV=3	1	16	2	8	16	39.2	56.5
155	P23254	4	4	Transketolase 1	TKL1	>sp|P23254|TKT1_YEAST Transketolase 1 OS=Saccharomyces cerevisiae (strain ATCC 204508 / S288c) GN=TKL1 PE=1 SV=4	1	4	4	1	3	1.8	6.2
156	P23255	2	2	Transcription initiation factor TFIID subunit 2	TAF2	>sp|P23255|TAF2_YEAST Transcription initiation factor TFIID subunit 2 OS=Saccharomyces cerevisiae (strain ATCC 204508 / S288c) GN=TAF2 PE=1 SV=3	1	2	2	2	0	1.6	0
157	P23291	9	3	Casein kinase I homolog 1	YCK1	>sp|P23291|KC11_YEAST Casein kinase I homolog 1 OS=Saccharomyces cerevisiae (strain ATCC 204508 / S288c) GN=YCK1 PE=1 SV=1	1	9	3	7	6	16	14.1
158	P23292	33	27	Casein kinase I homolog 2	YCK2	>sp|P23292|KC12_YEAST Casein kinase I homolog 2 OS=Saccharomyces cerevisiae (strain ATCC 204508 / S288c) GN=YCK2 PE=1 SV=1	1	33	27	32	28	68.3	63.4
159	P23337	45	35	Glycogen [starch] synthase isoform 1	GSY1	>sp|P23337|GYS1_YEAST Glycogen [starch] synthase isoform 1 OS=Saccharomyces cerevisiae (strain ATCC 204508 / S288c) GN=GSY1 PE=1 SV=3	1	45	35	43	36	59.2	51.3
160	P23641	2	2	Mitochondrial phosphate carrier protein	MIR1	>sp|P23641|MPCP_YEAST Mitochondrial phosphate carrier protein OS=Saccharomyces cerevisiae (strain ATCC 204508 / S288c) GN=MIR1 PE=1 SV=1	1	2	2	0	2	0	11.3
161	P24276	42	42	Protein SSD1	SSD1	>sp|P24276|SSD1_YEAST Protein SSD1 OS=Saccharomyces cerevisiae (strain ATCC 204508 / S288c) GN=SSD1 PE=1 SV=1	1	42	42	40	7	37.8	9.1
162	P24309	3	3	Lariat debranching enzyme	DBR1	>sp|P24309|DBR1_YEAST Lariat debranching enzyme OS=Saccharomyces cerevisiae (strain ATCC 204508 / S288c) GN=DBR1 PE=1 SV=1	1	3	3	3	0	9.4	0
163	P24482	1	1	DNA polymerase epsilon subunit B	DPB2	>sp|P24482|DPB2_YEAST DNA polymerase epsilon subunit B OS=Saccharomyces cerevisiae (strain ATCC 204508 / S288c) GN=DPB2 PE=1 SV=3	1	1	1	0	1	0	1.3
164	P24583	17	17	Protein kinase C-like 1	PKC1	>sp|P24583|KPC1_YEAST Protein kinase C-like 1 OS=Saccharomyces cerevisiae (strain ATCC 204508 / S288c) GN=PKC1 PE=1 SV=3	1	17	17	17	6	16.6	6
165	P24869	1	1	G2/mitotic-specific cyclin-2	CLB2	>sp|P24869|CG22_YEAST G2/mitotic-specific cyclin-2 OS=Saccharomyces cerevisiae (strain ATCC 204508 / S288c) GN=CLB2 PE=1 SV=1	1	1	1	1	0	3.7	0
166	P25042	7	7	Repressor ROX1	ROX1	>sp|P25042|ROX1_YEAST Repressor ROX1 OS=Saccharomyces cerevisiae (strain ATCC 204508 / S288c) GN=ROX1 PE=1 SV=1	1	7	7	7	1	26.6	3
167	P25044	3	3	Tyrosine-protein phosphatase 1	PTP1	>sp|P25044|PTP1_YEAST Tyrosine-protein phosphatase 1 OS=Saccharomyces cerevisiae (strain ATCC 204508 / S288c) GN=PTP1 PE=1 SV=1	1	3	3	3	0	7.5	0
168	P25297	1	1	Inorganic phosphate transporter PHO84	PHO84	>sp|P25297|PHO84_YEAST Inorganic phosphate transporter PHO84 OS=Saccharomyces cerevisiae (strain ATCC 204508 / S288c) GN=PHO84 PE=1 SV=2	1	1	1	0	1	0	3.4
169	P25339	10	10	Pumilio homology domain family member 4	PUF4	>sp|P25339|PUF4_YEAST Pumilio homology domain family member 4 OS=Saccharomyces cerevisiae (strain ATCC 204508 / S288c) GN=PUF4 PE=1 SV=2	1	10	10	9	3	12.7	6.4
170	P25341	3	1	Serine/threonine-protein kinase KIN82	KIN82	>sp|P25341|KIN82_YEAST Serine/threonine-protein kinase KIN82 OS=Saccharomyces cerevisiae (strain ATCC 204508 / S288c) GN=KIN82 PE=1 SV=3	1	3	1	3	3	4.6	4.6
171	P25378	1	1	Rheb-like protein RHB1	RHB1	>sp|P25378|RHEB_YEAST Rheb-like protein RHB1 OS=Saccharomyces cerevisiae (strain ATCC 204508 / S288c) GN=RHB1 PE=1 SV=2	1	1	1	0	1	0	5.3
172	P25382	11	11	Ribosome assembly protein 4	RSA4	>sp|P25382|NLE1_YEAST Ribosome assembly protein 4 OS=Saccharomyces cerevisiae (strain ATCC 204508 / S288c) GN=RSA4 PE=1 SV=3	1	11	11	10	4	23.7	8.2
173	P25384	47;9;9;9;8;7	1;1;1;1;0;0	Transposon Ty2-C Gag-Pol polyprotein;Capsid protein;Ty2 protease;Integrase;Reverse transcriptase/ribonuclease H	TY2B-C	>sp|P25384|YC21B_YEAST Transposon Ty2-C Gag-Pol polyprotein OS=Saccharomyces cerevisiae (strain ATCC 204508 / S288c) GN=TY2B-C PE=1 SV=2	6	47	1	47	22	29.5	12.7
174	P25441	8	8	DNA-directed RNA polymerase III subunit RPC4	RPC53	>sp|P25441|RPC4_YEAST DNA-directed RNA polymerase III subunit RPC4 OS=Saccharomyces cerevisiae (strain ATCC 204508 / S288c) GN=RPC53 PE=1 SV=2	1	8	8	8	0	21.8	0
175	P25515	1	1	V-type proton ATPase subunit c	VMA3	>sp|P25515|VATL1_YEAST V-type proton ATPase subunit c OS=Saccharomyces cerevisiae (strain ATCC 204508 / S288c) GN=VMA3 PE=1 SV=1	1	1	1	0	1	0	11.2
176	P25567	27	27	RNA-binding protein SRO9	SRO9	>sp|P25567|SRO9_YEAST RNA-binding protein SRO9 OS=Saccharomyces cerevisiae (strain ATCC 204508 / S288c) GN=SRO9 PE=1 SV=2	1	27	27	24	27	67.7	74
177	P25573	2	2	Mitochondrial inner membrane i-AAA protease supercomplex subunit MGR1	MGR1	>sp|P25573|MGR1_YEAST Mitochondrial inner membrane i-AAA protease supercomplex subunit MGR1 OS=Saccharomyces cerevisiae (strain ATCC 204508 / S288c) GN=MGR1 PE=1 SV=1	1	2	2	0	2	0	5
178	P25574	1	1	ER membrane protein complex subunit 1	EMC1	>sp|P25574|EMC1_YEAST ER membrane protein complex subunit 1 OS=Saccharomyces cerevisiae (strain ATCC 204508 / S288c) GN=EMC1 PE=1 SV=1	1	1	1	0	1	0	1.2
179	P25591	1	1	vacuole-related protein 17	VAC17	>sp|P25591|VAC17_YEAST vacuole-related protein 17 OS=Saccharomyces cerevisiae (strain ATCC 204508 / S288c) GN=VAC17 PE=1 SV=2	1	1	1	1	1	2.6	2.6
180	P25605	17	17	Acetolactate synthase small subunit, mitochondrial	ILV6	>sp|P25605|ILV6_YEAST Acetolactate synthase small subunit, mitochondrial OS=Saccharomyces cerevisiae (strain ATCC 204508 / S288c) GN=ILV6 PE=1 SV=2	1	17	17	17	15	71.2	68.9
181	P25616	1	1	UPF0655 protein YCR015C		>sp|P25616|YCQ5_YEAST UPF0655 protein YCR015C OS=Saccharomyces cerevisiae (strain ATCC 204508 / S288c) GN=YCR015C PE=2 SV=2	1	1	1	0	1	0	6.3
182	P25847	8	8	DNA mismatch repair protein MSH2	MSH2	>sp|P25847|MSH2_YEAST DNA mismatch repair protein MSH2 OS=Saccharomyces cerevisiae (strain ATCC 204508 / S288c) GN=MSH2 PE=1 SV=2	1	8	8	8	0	8.8	0
183	P26321	3	3	60S ribosomal protein L5	RPL5	>sp|P26321|RL5_YEAST 60S ribosomal protein L5 OS=Saccharomyces cerevisiae (strain ATCC 204508 / S288c) GN=RPL5 PE=1 SV=4	1	3	3	0	3	0	11.4
184	P26570	20;6	20;6	Serine/threonine-protein phosphatase PP-Z1	PPZ1	>sp|P26570|PPZ1_YEAST Serine/threonine-protein phosphatase PP-Z1 OS=Saccharomyces cerevisiae (strain ATCC 204508 / S288c) GN=PPZ1 PE=1 SV=5	2	20	20	20	9	41.9	20.7
185	P26637	5	5	Leucine--tRNA ligase, cytoplasmic	CDC60	>sp|P26637|SYLC_YEAST Leucine--tRNA ligase, cytoplasmic OS=Saccharomyces cerevisiae (strain ATCC 204508 / S288c) GN=CDC60 PE=1 SV=1	1	5	5	0	5	0	5
186	P26785	1	1	60S ribosomal protein L16-B	RPL16B	>sp|P26785|RL16B_YEAST 60S ribosomal protein L16-B OS=Saccharomyces cerevisiae (strain ATCC 204508 / S288c) GN=RPL16B PE=1 SV=3	1	1	1	1	0	7.6	0
187	P26798	5	5	Protein INO2	INO2	>sp|P26798|INO2_YEAST Protein INO2 OS=Saccharomyces cerevisiae (strain ATCC 204508 / S288c) GN=INO2 PE=1 SV=1	1	5	5	5	5	29.9	29.9
188	P27472	61	51	Glycogen [starch] synthase isoform 2	GSY2	>sp|P27472|GYS2_YEAST Glycogen [starch] synthase isoform 2 OS=Saccharomyces cerevisiae (strain ATCC 204508 / S288c) GN=GSY2 PE=1 SV=3	1	61	51	61	55	66.8	63.8
189	P27514	1	1	Low-affinity phosphate transporter PHO91	PHO91	>sp|P27514|PHO91_YEAST Low-affinity phosphate transporter PHO91 OS=Saccharomyces cerevisiae (strain ATCC 204508 / S288c) GN=PHO91 PE=1 SV=2	1	1	1	1	0	1.6	0
190	P27614	27	27	Carboxypeptidase S	CPS1	>sp|P27614|CBPS_YEAST Carboxypeptidase S OS=Saccharomyces cerevisiae (strain ATCC 204508 / S288c) GN=CPS1 PE=1 SV=2	1	27	27	27	21	41.8	36.6
191	P27616	1	1	Phosphoribosylaminoimidazole-succinocarboxamide synthase	ADE1	>sp|P27616|PUR7_YEAST Phosphoribosylaminoimidazole-succinocarboxamide synthase OS=Saccharomyces cerevisiae (strain ATCC 204508 / S288c) GN=ADE1 PE=1 SV=2	1	1	1	1	1	6.9	6.9
192	P27636	1	1	Cell division control protein 15	CDC15	>sp|P27636|CDC15_YEAST Cell division control protein 15 OS=Saccharomyces cerevisiae (strain ATCC 204508 / S288c) GN=CDC15 PE=1 SV=3	1	1	1	0	1	0	1.6
193	P27692	4	4	Transcription elongation factor SPT5	SPT5	>sp|P27692|SPT5_YEAST Transcription elongation factor SPT5 OS=Saccharomyces cerevisiae (strain ATCC 204508 / S288c) GN=SPT5 PE=1 SV=1	1	4	4	4	0	6.1	0
194	P27810	16	15	Alpha-1,2 mannosyltransferase KTR1	KTR1	>sp|P27810|KTR1_YEAST Alpha-1,2 mannosyltransferase KTR1 OS=Saccharomyces cerevisiae (strain ATCC 204508 / S288c) GN=KTR1 PE=1 SV=1	1	16	15	8	15	20.6	39.2
195	P27895	1	1	Kinesin-like protein CIN8	CIN8	>sp|P27895|CIN8_YEAST Kinesin-like protein CIN8 OS=Saccharomyces cerevisiae (strain ATCC 204508 / S288c) GN=CIN8 PE=1 SV=3	1	1	1	1	0	1.5	0
196	P28239	1	1	Inorganic pyrophosphatase, mitochondrial	PPA2	>sp|P28239|IPYR2_YEAST Inorganic pyrophosphatase, mitochondrial OS=Saccharomyces cerevisiae (strain ATCC 204508 / S288c) GN=PPA2 PE=1 SV=1	1	1	1	1	0	2.3	0
197	P28274	11;3	11;3	CTP synthase 1	URA7	>sp|P28274|URA7_YEAST CTP synthase 1 OS=Saccharomyces cerevisiae (strain ATCC 204508 / S288c) GN=URA7 PE=1 SV=2	2	11	11	4	9	5.9	14.5
198	P29295	15;1	15;1	Casein kinase I homolog HRR25	HRR25	>sp|P29295|HRR25_YEAST Casein kinase I homolog HRR25 OS=Saccharomyces cerevisiae (strain ATCC 204508 / S288c) GN=HRR25 PE=1 SV=1	2	15	15	12	13	26.9	31.8
199	P29453;P17076	2;1	2;1	60S ribosomal protein L8-B;60S ribosomal protein L8-A	RPL8B;RPL8A	>sp|P29453|RL8B_YEAST 60S ribosomal protein L8-B OS=Saccharomyces cerevisiae (strain ATCC 204508 / S288c) GN=RPL8B PE=1 SV=3;>sp|P17076|RL8A_YEAST 60S ribosomal protein L8-A OS=Saccharomyces cerevisiae (strain ATCC 204508 / S288c) GN=RPL8A PE=1 SV=4	2	2	2	2	0	9	0
200	P29461	1	1	Tyrosine-protein phosphatase 2	PTP2	>sp|P29461|PTP2_YEAST Tyrosine-protein phosphatase 2 OS=Saccharomyces cerevisiae (strain ATCC 204508 / S288c) GN=PTP2 PE=1 SV=1	1	1	1	1	0	1.2	0
201	P29704	4	4	Squalene synthase	ERG9	>sp|P29704|FDFT_YEAST Squalene synthase OS=Saccharomyces cerevisiae (strain ATCC 204508 / S288c) GN=ERG9 PE=1 SV=2	1	4	4	0	4	0	7.7
202	P30619	3	3	Protein transport protein SEC1	SEC1	>sp|P30619|SEC1_YEAST Protein transport protein SEC1 OS=Saccharomyces cerevisiae (strain ATCC 204508 / S288c) GN=SEC1 PE=1 SV=1	1	3	3	1	2	1.2	3.3
203	P30624	4	4	Long-chain-fatty-acid--CoA ligase 1	FAA1	>sp|P30624|LCF1_YEAST Long-chain-fatty-acid--CoA ligase 1 OS=Saccharomyces cerevisiae (strain ATCC 204508 / S288c) GN=FAA1 PE=1 SV=1	1	4	4	0	4	0	5.1
204	P30665	2	2	DNA replication licensing factor MCM4	MCM4	>sp|P30665|MCM4_YEAST DNA replication licensing factor MCM4 OS=Saccharomyces cerevisiae (strain ATCC 204508 / S288c) GN=MCM4 PE=1 SV=2	1	2	2	0	2	0	1.5
205	P30952	8;1	8;1	Malate synthase 1, glyoxysomal	MLS1	>sp|P30952|MASY_YEAST Malate synthase 1, glyoxysomal OS=Saccharomyces cerevisiae (strain ATCC 204508 / S288c) GN=MLS1 PE=1 SV=1	2	8	8	0	8	0	20
206	P31374;Q08217	1;1	1;1	Serine/threonine-protein kinase PSK1;Serine/threonine-protein kinase PSK2	PSK1;PSK2	>sp|P31374|PSK1_YEAST Serine/threonine-protein kinase PSK1 OS=Saccharomyces cerevisiae (strain ATCC 204508 / S288c) GN=PSK1 PE=1 SV=2;>sp|Q08217|PSK2_YEAST Serine/threonine-protein kinase PSK2 OS=Saccharomyces cerevisiae (strain ATCC 204508 / S288c) GN=PSK	2	1	1	1	0	1.2	0
207	P31376	5	5	SWR1-complex protein 3	SWC3	>sp|P31376|SWC3_YEAST SWR1-complex protein 3 OS=Saccharomyces cerevisiae (strain ATCC 204508 / S288c) GN=SWC3 PE=1 SV=2	1	5	5	4	1	9.1	1.1
208	P31385	7	7	Transcriptional regulatory protein DEP1	DEP1	>sp|P31385|DEP1_YEAST Transcriptional regulatory protein DEP1 OS=Saccharomyces cerevisiae (strain ATCC 204508 / S288c) GN=DEP1 PE=1 SV=3	1	7	7	7	0	17.8	0
209	P31539	6	6	Heat shock protein 104	HSP104	>sp|P31539|HS104_YEAST Heat shock protein 104 OS=Saccharomyces cerevisiae (strain ATCC 204508 / S288c) GN=HSP104 PE=1 SV=2	1	6	6	0	6	0	8.7
210	P32288	9;1	9;1	Glutamine synthetase	GLN1	>sp|P32288|GLNA_YEAST Glutamine synthetase OS=Saccharomyces cerevisiae (strain ATCC 204508 / S288c) GN=GLN1 PE=1 SV=4	2	9	9	4	8	13.5	23.5
211	P32316	30	30	Acetyl-CoA hydrolase	ACH1	>sp|P32316|ACH1_YEAST Acetyl-CoA hydrolase OS=Saccharomyces cerevisiae (strain ATCC 204508 / S288c) GN=ACH1 PE=1 SV=2	1	30	30	30	21	54.4	42.4
212	P32324	24	24	Elongation factor 2	EFT1	>sp|P32324|EF2_YEAST Elongation factor 2 OS=Saccharomyces cerevisiae (strain ATCC 204508 / S288c) GN=EFT1 PE=1 SV=1	1	24	24	4	23	6.4	31.8
213	P32327	46	11	Pyruvate carboxylase 2	PYC2	>sp|P32327|PYC2_YEAST Pyruvate carboxylase 2 OS=Saccharomyces cerevisiae (strain ATCC 204508 / S288c) GN=PYC2 PE=1 SV=2	1	46	11	42	37	35.3	35.1
214	P32340	7	7	Rotenone-insensitive NADH-ubiquinone oxidoreductase, mitochondrial	NDI1	>sp|P32340|NDI1_YEAST Rotenone-insensitive NADH-ubiquinone oxidoreductase, mitochondrial OS=Saccharomyces cerevisiae (strain ATCC 204508 / S288c) GN=NDI1 PE=1 SV=1	1	7	7	0	7	0	16.6
215	P32349	3	3	DNA-directed RNA polymerase III subunit RPC3	RPC82	>sp|P32349|RPC3_YEAST DNA-directed RNA polymerase III subunit RPC3 OS=Saccharomyces cerevisiae (strain ATCC 204508 / S288c) GN=RPC82 PE=1 SV=2	1	3	3	3	0	6	0
216	P32353	1	1	C-5 sterol desaturase	ERG3	>sp|P32353|ERG3_YEAST C-5 sterol desaturase OS=Saccharomyces cerevisiae (strain ATCC 204508 / S288c) GN=ERG3 PE=1 SV=1	1	1	1	1	1	4.9	4.9
217	P32363	1	1	Phosphatidylinositol N-acetylglucosaminyltransferase GPI3 subunit	SPT14	>sp|P32363|GPI3_YEAST Phosphatidylinositol N-acetylglucosaminyltransferase GPI3 subunit OS=Saccharomyces cerevisiae (strain ATCC 204508 / S288c) GN=SPT14 PE=1 SV=4	1	1	1	1	0	2.9	0
218	P32368	17	17	Phosphoinositide phosphatase SAC1	SAC1	>sp|P32368|SAC1_YEAST Phosphoinositide phosphatase SAC1 OS=Saccharomyces cerevisiae (strain ATCC 204508 / S288c) GN=SAC1 PE=1 SV=1	1	17	17	4	15	9	31.8
219	P32380	1	1	Spindle pole body component 110	SPC110	>sp|P32380|SP110_YEAST Spindle pole body component 110 OS=Saccharomyces cerevisiae (strain ATCC 204508 / S288c) GN=SPC110 PE=1 SV=1	1	1	1	1	1	1.2	1.2
220	P32432	14	14	Transcription factor SFP1	SFP1	>sp|P32432|SFP1_YEAST Transcription factor SFP1 OS=Saccharomyces cerevisiae (strain ATCC 204508 / S288c) GN=SFP1 PE=1 SV=1	1	14	14	14	2	36.2	7.2
221	P32449	9;1	9;1	Phospho-2-dehydro-3-deoxyheptonate aldolase, tyrosine-inhibited	ARO4	>sp|P32449|AROG_YEAST Phospho-2-dehydro-3-deoxyheptonate aldolase, tyrosine-inhibited OS=Saccharomyces cerevisiae (strain ATCC 204508 / S288c) GN=ARO4 PE=1 SV=2	2	9	9	9	5	28.4	16.5
222	P32457	21	21	Cell division control protein 3	CDC3	>sp|P32457|CDC3_YEAST Cell division control protein 3 OS=Saccharomyces cerevisiae (strain ATCC 204508 / S288c) GN=CDC3 PE=1 SV=3	1	21	21	21	1	50.6	1.9
223	P32480	5	5	Protein HIR2	HIR2	>sp|P32480|HIR2_YEAST Protein HIR2 OS=Saccharomyces cerevisiae (strain ATCC 204508 / S288c) GN=HIR2 PE=1 SV=2	1	5	5	5	0	6.1	0
224	P32485	5	5	Mitogen-activated protein kinase HOG1	HOG1	>sp|P32485|HOG1_YEAST Mitogen-activated protein kinase HOG1 OS=Saccharomyces cerevisiae (strain ATCC 204508 / S288c) GN=HOG1 PE=1 SV=2	1	5	5	2	5	6.4	19.1
225	P32489	1	1	Meiosis protein 5	MEI5	>sp|P32489|MEI5_YEAST Meiosis protein 5 OS=Saccharomyces cerevisiae (strain ATCC 204508 / S288c) GN=MEI5 PE=1 SV=2	1	1	1	1	0	3.6	0
226	P32492	2	2	Myosin-4	MYO4	>sp|P32492|MYO4_YEAST Myosin-4 OS=Saccharomyces cerevisiae (strain ATCC 204508 / S288c) GN=MYO4 PE=1 SV=1	1	2	2	1	1	1.3	0.8
227	P32499	1	1	Nucleoporin NUP2	NUP2	>sp|P32499|NUP2_YEAST Nucleoporin NUP2 OS=Saccharomyces cerevisiae (strain ATCC 204508 / S288c) GN=NUP2 PE=1 SV=2	1	1	1	0	1	0	2.5
228	P32522	2	2	Pentatricopeptide repeat-containing protein PET309, mitochondrial	PET309	>sp|P32522|PT309_YEAST Pentatricopeptide repeat-containing protein PET309, mitochondrial OS=Saccharomyces cerevisiae (strain ATCC 204508 / S288c) GN=PET309 PE=1 SV=1	1	2	2	1	1	2.5	1.1
229	P32563	6	6	V-type proton ATPase subunit a, vacuolar isoform	VPH1	>sp|P32563|VPH1_YEAST V-type proton ATPase subunit a, vacuolar isoform OS=Saccharomyces cerevisiae (strain ATCC 204508 / S288c) GN=VPH1 PE=1 SV=3	1	6	6	0	6	0	9.8
230	P32578	27	27	SNF1 protein kinase subunit beta-1	SIP1	>sp|P32578|SIP1_YEAST SNF1 protein kinase subunit beta-1 OS=Saccharomyces cerevisiae (strain ATCC 204508 / S288c) GN=SIP1 PE=1 SV=2	1	27	27	22	23	34.8	38.8
231	P32597	5	4	Nuclear protein STH1/NPS1	STH1	>sp|P32597|STH1_YEAST Nuclear protein STH1/NPS1 OS=Saccharomyces cerevisiae (strain ATCC 204508 / S288c) GN=STH1 PE=1 SV=1	1	5	4	5	0	3.8	0
232	P32634	44	44	Negative regulator of sporulation PMD1	PMD1	>sp|P32634|PMD1_YEAST Negative regulator of sporulation PMD1 OS=Saccharomyces cerevisiae (strain ATCC 204508 / S288c) GN=PMD1 PE=1 SV=1	1	44	44	26	44	16.5	30.2
233	P32639	2	2	Pre-mRNA-splicing helicase BRR2	BRR2	>sp|P32639|BRR2_YEAST Pre-mRNA-splicing helicase BRR2 OS=Saccharomyces cerevisiae (strain ATCC 204508 / S288c) GN=BRR2 PE=1 SV=2	1	2	2	0	2	0	0.9
234	P32660	2	2	Phospholipid-transporting ATPase DNF1	DNF1	>sp|P32660|ATC5_YEAST Phospholipid-transporting ATPase DNF1 OS=Saccharomyces cerevisiae (strain ATCC 204508 / S288c) GN=DNF1 PE=1 SV=2	1	2	2	2	0	1.2	0
235	P32773	2	2	Transcription initiation factor IIA large subunit	TOA1	>sp|P32773|TOA1_YEAST Transcription initiation factor IIA large subunit OS=Saccharomyces cerevisiae (strain ATCC 204508 / S288c) GN=TOA1 PE=1 SV=1	1	2	2	2	0	4.9	0
236	P32775	28	28	1,4-alpha-glucan-branching enzyme	GLC3	>sp|P32775|GLGB_YEAST 1,4-alpha-glucan-branching enzyme OS=Saccharomyces cerevisiae (strain ATCC 204508 / S288c) GN=GLC3 PE=1 SV=2	1	28	28	28	18	45.9	27.6
237	P32798	8	8	Cobalt uptake protein COT1	COT1	>sp|P32798|COT1_YEAST Cobalt uptake protein COT1 OS=Saccharomyces cerevisiae (strain ATCC 204508 / S288c) GN=COT1 PE=1 SV=2	1	8	8	3	8	14.1	28.7
238	P32803	2	2	Endosomal protein P24B	EMP24	>sp|P32803|EMP24_YEAST Endosomal protein P24B OS=Saccharomyces cerevisiae (strain ATCC 204508 / S288c) GN=EMP24 PE=1 SV=1	1	2	2	2	0	15.3	0
239	P32805	11	11	Zinc finger protein FZF1	FZF1	>sp|P32805|FZF1_YEAST Zinc finger protein FZF1 OS=Saccharomyces cerevisiae (strain ATCC 204508 / S288c) GN=FZF1 PE=1 SV=2	1	11	11	11	4	35.5	12
240	P32861	3	3	UTP--glucose-1-phosphate uridylyltransferase	UGP1	>sp|P32861|UGPA1_YEAST UTP--glucose-1-phosphate uridylyltransferase OS=Saccharomyces cerevisiae (strain ATCC 204508 / S288c) GN=UGP1 PE=1 SV=1	1	3	3	1	2	1.6	4.2
241	P32867	1	1	Protein SSO1	SSO1	>sp|P32867|SSO1_YEAST Protein SSO1 OS=Saccharomyces cerevisiae (strain ATCC 204508 / S288c) GN=SSO1 PE=1 SV=2	1	1	1	1	1	2.8	2.8
242	P32912	1	1	Vacuolar morphogenesis protein 7	VAM7	>sp|P32912|VAM7_YEAST Vacuolar morphogenesis protein 7 OS=Saccharomyces cerevisiae (strain ATCC 204508 / S288c) GN=VAM7 PE=1 SV=1	1	1	1	0	1	0	5.7
243	P33122	5	5	Serine-rich protein TYE7	TYE7	>sp|P33122|TYE7_YEAST Serine-rich protein TYE7 OS=Saccharomyces cerevisiae (strain ATCC 204508 / S288c) GN=TYE7 PE=1 SV=1	1	5	5	5	0	21.6	0
244	P33301	2	2	DNA repair protein XRS2	XRS2	>sp|P33301|XRS2_YEAST DNA repair protein XRS2 OS=Saccharomyces cerevisiae (strain ATCC 204508 / S288c) GN=XRS2 PE=1 SV=1	1	2	2	1	1	2.2	1.5
245	P33304	1	1	Protein AFR1	AFR1	>sp|P33304|AFR1_YEAST Protein AFR1 OS=Saccharomyces cerevisiae (strain ATCC 204508 / S288c) GN=AFR1 PE=1 SV=1	1	1	1	1	0	2.1	0
246	P33327	3	3	NAD-specific glutamate dehydrogenase	GDH2	>sp|P33327|DHE2_YEAST NAD-specific glutamate dehydrogenase OS=Saccharomyces cerevisiae (strain ATCC 204508 / S288c) GN=GDH2 PE=1 SV=1	1	3	3	1	2	0.8	2.8
247	P33401	1	1	Phosphoglucomutase-1	PGM1	>sp|P33401|PGM1_YEAST Phosphoglucomutase-1 OS=Saccharomyces cerevisiae (strain ATCC 204508 / S288c) GN=PGM1 PE=1 SV=1	1	1	1	0	1	0	3.3
248	P33421	3	3	Succinate dehydrogenase [ubiquinone] cytochrome b subunit, mitochondrial	SDH3	>sp|P33421|SDH3_YEAST Succinate dehydrogenase [ubiquinone] cytochrome b subunit, mitochondrial OS=Saccharomyces cerevisiae (strain ATCC 204508 / S288c) GN=SDH3 PE=1 SV=1	1	3	3	1	3	5.6	14.1
249	P33442	16	2	40S ribosomal protein S1-A	RPS1A	>sp|P33442|RS3A1_YEAST 40S ribosomal protein S1-A OS=Saccharomyces cerevisiae (strain ATCC 204508 / S288c) GN=RPS1A PE=1 SV=2	1	16	2	8	16	39.2	56.5
250	P33750	7	7	Protein SOF1	SOF1	>sp|P33750|DCA13_YEAST Protein SOF1 OS=Saccharomyces cerevisiae (strain ATCC 204508 / S288c) GN=SOF1 PE=1 SV=1	1	7	7	7	0	20.7	0
251	P33755	1	1	Nuclear protein localization protein 4	NPL4	>sp|P33755|NPL4_YEAST Nuclear protein localization protein 4 OS=Saccharomyces cerevisiae (strain ATCC 204508 / S288c) GN=NPL4 PE=1 SV=1	1	1	1	1	0	2.8	0
252	P34219	40	39	Transcriptional regulatory protein TOD6	TOD6	>sp|P34219|TOD6_YEAST Transcriptional regulatory protein TOD6 OS=Saccharomyces cerevisiae (strain ATCC 204508 / S288c) GN=TOD6 PE=1 SV=1	1	40	39	39	39	77.1	77.5
253	P34230	1	1	Peroxisomal long-chain fatty acid import protein 1	PXA2	>sp|P34230|PXA2_YEAST Peroxisomal long-chain fatty acid import protein 1 OS=Saccharomyces cerevisiae (strain ATCC 204508 / S288c) GN=PXA2 PE=1 SV=1	1	1	1	1	0	1.2	0
254	P34239	1	1	Protein LST4	LST4	>sp|P34239|LST4_YEAST Protein LST4 OS=Saccharomyces cerevisiae (strain ATCC 204508 / S288c) GN=LST4 PE=1 SV=1	1	1	1	1	1	1.3	1.3
255	P34240	6	6	Zinc-regulated transporter 3	ZRT3	>sp|P34240|ZRT3_YEAST Zinc-regulated transporter 3 OS=Saccharomyces cerevisiae (strain ATCC 204508 / S288c) GN=ZRT3 PE=1 SV=2	1	6	6	2	6	3.8	12.3
256	P34241	1	1	Nucleolar pre-ribosomal-associated protein 1	URB1	>sp|P34241|URB1_YEAST Nucleolar pre-ribosomal-associated protein 1 OS=Saccharomyces cerevisiae (strain ATCC 204508 / S288c) GN=URB1 PE=1 SV=2	1	1	1	0	1	0	0.9
257	P34756	13	13	1-phosphatidylinositol 3-phosphate 5-kinase FAB1	FAB1	>sp|P34756|FAB1_YEAST 1-phosphatidylinositol 3-phosphate 5-kinase FAB1 OS=Saccharomyces cerevisiae (strain ATCC 204508 / S288c) GN=FAB1 PE=1 SV=3	1	13	13	8	11	4.9	6.2
258	P34909	27	27	General negative regulator of transcription subunit 4	MOT2	>sp|P34909|NOT4_YEAST General negative regulator of transcription subunit 4 OS=Saccharomyces cerevisiae (strain ATCC 204508 / S288c) GN=MOT2 PE=1 SV=1	1	27	27	26	22	54.5	47.9
259	P35169	1	1	Serine/threonine-protein kinase TOR1	TOR1	>sp|P35169|TOR1_YEAST Serine/threonine-protein kinase TOR1 OS=Saccharomyces cerevisiae (strain ATCC 204508 / S288c) GN=TOR1 PE=1 SV=3	1	1	1	1	0	0.7	0
260	P35177	3	3	Transcriptional activator SPT7	SPT7	>sp|P35177|SPT7_YEAST Transcriptional activator SPT7 OS=Saccharomyces cerevisiae (strain ATCC 204508 / S288c) GN=SPT7 PE=1 SV=1	1	3	3	2	1	1.4	0.5
261	P35729	1	1	Nucleoporin NUP120	NUP120	>sp|P35729|NU120_YEAST Nucleoporin NUP120 OS=Saccharomyces cerevisiae (strain ATCC 204508 / S288c) GN=NUP120 PE=1 SV=1	1	1	1	0	1	0	1.2
262	P36002	29	28	Serine/threonine-protein kinase PTK1/STK1	PTK1	>sp|P36002|PTK1_YEAST Serine/threonine-protein kinase PTK1/STK1 OS=Saccharomyces cerevisiae (strain ATCC 204508 / S288c) GN=PTK1 PE=1 SV=3	1	29	28	26	23	55.1	44.9
263	P36004	16	16	Probable serine/threonine-protein kinase KKQ8	KKQ8	>sp|P36004|KKQ8_YEAST Probable serine/threonine-protein kinase KKQ8 OS=Saccharomyces cerevisiae (strain ATCC 204508 / S288c) GN=KKQ8 PE=1 SV=2	1	16	16	15	7	26.4	12.7
264	P36006;Q04439	3;2	3;2	Myosin-3;Myosin-5	MYO3;MYO5	>sp|P36006|MYO3_YEAST Myosin-3 OS=Saccharomyces cerevisiae (strain ATCC 204508 / S288c) GN=MYO3 PE=1 SV=4;>sp|Q04439|MYO5_YEAST Myosin-5 OS=Saccharomyces cerevisiae (strain ATCC 204508 / S288c) GN=MYO5 PE=1 SV=1	2	3	3	0	3	0	3.9
265	P36013	2	2	NAD-dependent malic enzyme, mitochondrial	MAE1	>sp|P36013|MAOM_YEAST NAD-dependent malic enzyme, mitochondrial OS=Saccharomyces cerevisiae (strain ATCC 204508 / S288c) GN=MAE1 PE=1 SV=1	1	2	2	0	2	0	4.6
266	P36024	1	1	Phosphopantothenoylcysteine decarboxylase subunit SIS2	SIS2	>sp|P36024|SIS2_YEAST Phosphopantothenoylcysteine decarboxylase subunit SIS2 OS=Saccharomyces cerevisiae (strain ATCC 204508 / S288c) GN=SIS2 PE=1 SV=1	1	1	1	1	0	2.8	0
267	P36026	18;1	18;1	Ubiquitin carboxyl-terminal hydrolase 11	UBP11	>sp|P36026|UBP11_YEAST Ubiquitin carboxyl-terminal hydrolase 11 OS=Saccharomyces cerevisiae (strain ATCC 204508 / S288c) GN=UBP11 PE=2 SV=1	2	18	18	12	17	20.8	27.6
268	P36034	1	1	Protein COS9	COS9	>sp|P36034|COS9_YEAST Protein COS9 OS=Saccharomyces cerevisiae (strain ATCC 204508 / S288c) GN=COS9 PE=2 SV=1	1	1	1	0	1	0	2.9
269	P36049	1	1	rRNA-processing protein EBP2	EBP2	>sp|P36049|EBP2_YEAST rRNA-processing protein EBP2 OS=Saccharomyces cerevisiae (strain ATCC 204508 / S288c) GN=EBP2 PE=1 SV=1	1	1	1	1	0	4	0
270	P36069	6	6	Probable phosphomutase PMU1	PMU1	>sp|P36069|PMU1_YEAST Probable phosphomutase PMU1 OS=Saccharomyces cerevisiae (strain ATCC 204508 / S288c) GN=PMU1 PE=1 SV=1	1	6	6	6	0	22.4	0
271	P36070	1	1	RNA polymerase I-specific transcription initiation factor RRN3	RRN3	>sp|P36070|RRN3_YEAST RNA polymerase I-specific transcription initiation factor RRN3 OS=Saccharomyces cerevisiae (strain ATCC 204508 / S288c) GN=RRN3 PE=1 SV=1	1	1	1	0	1	0	2.1
272	P36081	2	2	Uncharacterized protein YKL077W	YKL077W	>sp|P36081|YKH7_YEAST Uncharacterized protein YKL077W OS=Saccharomyces cerevisiae (strain ATCC 204508 / S288c) GN=YKL077W PE=1 SV=1	1	2	2	1	2	2.3	2.3
273	P36096	1	1	Transmembrane E3 ubiquitin-protein ligase 1	TUL1	>sp|P36096|TUL1_YEAST Transmembrane E3 ubiquitin-protein ligase 1 OS=Saccharomyces cerevisiae (strain ATCC 204508 / S288c) GN=TUL1 PE=1 SV=1	1	1	1	1	0	1.5	0
274	P36104	1	1	COMPASS component SWD2	SWD2	>sp|P36104|SWD2_YEAST COMPASS component SWD2 OS=Saccharomyces cerevisiae (strain ATCC 204508 / S288c) GN=SWD2 PE=1 SV=1	1	1	1	0	1	0	4
275	P36120	3	3	ATP-dependent RNA helicase DBP7	DBP7	>sp|P36120|DBP7_YEAST ATP-dependent RNA helicase DBP7 OS=Saccharomyces cerevisiae (strain ATCC 204508 / S288c) GN=DBP7 PE=1 SV=1	1	3	3	2	1	4.7	1.5
276	P36126	48	48	Phospholipase D1	SPO14	>sp|P36126|SPO14_YEAST Phospholipase D1 OS=Saccharomyces cerevisiae (strain ATCC 204508 / S288c) GN=SPO14 PE=1 SV=3	1	48	48	45	34	31.9	26
277	P36135	4;1	4;1	Protein UTH1	UTH1	>sp|P36135|UTH1_YEAST Protein UTH1 OS=Saccharomyces cerevisiae (strain ATCC 204508 / S288c) GN=UTH1 PE=1 SV=2	2	4	4	4	3	13.4	11.2
278	P36136	1	1	Sedoheptulose 1,7-bisphosphatase	SHB17	>sp|P36136|SHB17_YEAST Sedoheptulose 1,7-bisphosphatase OS=Saccharomyces cerevisiae (strain ATCC 204508 / S288c) GN=SHB17 PE=1 SV=1	1	1	1	1	0	5.5	0
279	P36152	1	1	Fe-S cluster assembly protein DRE2	DRE2	>sp|P36152|DRE2_YEAST Fe-S cluster assembly protein DRE2 OS=Saccharomyces cerevisiae (strain ATCC 204508 / S288c) GN=DRE2 PE=1 SV=1	1	1	1	1	0	6.6	0
280	P36155	10	10	Uncharacterized protein YKR075C	YKR075C	>sp|P36155|YK55_YEAST Uncharacterized protein YKR075C OS=Saccharomyces cerevisiae (strain ATCC 204508 / S288c) GN=YKR075C PE=1 SV=1	1	10	10	9	9	43.6	44
281	P36156	20	20	Glutathione S-transferase omega-like 2	ECM4	>sp|P36156|GTO2_YEAST Glutathione S-transferase omega-like 2 OS=Saccharomyces cerevisiae (strain ATCC 204508 / S288c) GN=ECM4 PE=1 SV=1	1	20	20	19	17	59.2	54.3
282	P37291	32	31	Serine hydroxymethyltransferase, cytosolic	SHM2	>sp|P37291|GLYC_YEAST Serine hydroxymethyltransferase, cytosolic OS=Saccharomyces cerevisiae (strain ATCC 204508 / S288c) GN=SHM2 PE=1 SV=2	1	32	31	32	30	58	56.3
283	P37292	10	9	Serine hydroxymethyltransferase, mitochondrial	SHM1	>sp|P37292|GLYM_YEAST Serine hydroxymethyltransferase, mitochondrial OS=Saccharomyces cerevisiae (strain ATCC 204508 / S288c) GN=SHM1 PE=1 SV=2	1	10	9	6	7	16.3	16.5
284	P37838	1	1	Nucleolar protein 4	NOP4	>sp|P37838|NOP4_YEAST Nucleolar protein 4 OS=Saccharomyces cerevisiae (strain ATCC 204508 / S288c) GN=NOP4 PE=1 SV=1	1	1	1	0	1	0	2.5
285	P38041	39	37	Protein BOB1	BOI1	>sp|P38041|BOB1_YEAST Protein BOB1 OS=Saccharomyces cerevisiae (strain ATCC 204508 / S288c) GN=BOI1 PE=1 SV=1	1	39	37	39	0	51	0
286	P38061	15	15	60S ribosomal protein L32	RPL32	>sp|P38061|RL32_YEAST 60S ribosomal protein L32 OS=Saccharomyces cerevisiae (strain ATCC 204508 / S288c) GN=RPL32 PE=1 SV=1	1	15	15	15	4	63.8	28.5
287	P38065	1	1	AP-2 complex subunit alpha	APL3	>sp|P38065|AP2A_YEAST AP-2 complex subunit alpha OS=Saccharomyces cerevisiae (strain ATCC 204508 / S288c) GN=APL3 PE=1 SV=1	1	1	1	0	1	0	1.5
288	P38068	3	3	Monothiol glutaredoxin-7	GRX7	>sp|P38068|GLRX7_YEAST Monothiol glutaredoxin-7 OS=Saccharomyces cerevisiae (strain ATCC 204508 / S288c) GN=GRX7 PE=2 SV=1	1	3	3	0	3	0	14.3
289	P38073	2	2	Transcriptional regulatory protein EDS1	EDS1	>sp|P38073|EDS1_YEAST Transcriptional regulatory protein EDS1 OS=Saccharomyces cerevisiae (strain ATCC 204508 / S288c) GN=EDS1 PE=1 SV=1	1	2	2	2	2	2	2
290	P38079	2	1	Protein YRO2	YRO2	>sp|P38079|YRO2_YEAST Protein YRO2 OS=Saccharomyces cerevisiae (strain ATCC 204508 / S288c) GN=YRO2 PE=1 SV=1	1	2	1	0	2	0	9.6
291	P38083	1	1	Uncharacterized protein YBR063C		>sp|P38083|YBR3_YEAST Uncharacterized protein YBR063C OS=Saccharomyces cerevisiae (strain ATCC 204508 / S288c) GN=YBR063C PE=2 SV=1	1	1	1	1	0	4.2	0
292	P38084	1	1	Leu/Val/Ile amino-acid permease	BAP2	>sp|P38084|BAP2_YEAST Leu/Val/Ile amino-acid permease OS=Saccharomyces cerevisiae (strain ATCC 204508 / S288c) GN=BAP2 PE=1 SV=2	1	1	1	1	0	3.4	0
293	P38110	1	1	Serine/threonine-protein kinase TEL1	TEL1	>sp|P38110|ATM_YEAST Serine/threonine-protein kinase TEL1 OS=Saccharomyces cerevisiae (strain ATCC 204508 / S288c) GN=TEL1 PE=1 SV=3	1	1	1	1	0	0.6	0
294	P38121	1	1	DNA polymerase alpha subunit B	POL12	>sp|P38121|DPOA2_YEAST DNA polymerase alpha subunit B OS=Saccharomyces cerevisiae (strain ATCC 204508 / S288c) GN=POL12 PE=1 SV=1	1	1	1	0	1	0	2.3
295	P38129	5	5	Transcription initiation factor TFIID subunit 5	TAF5	>sp|P38129|TAF5_YEAST Transcription initiation factor TFIID subunit 5 OS=Saccharomyces cerevisiae (strain ATCC 204508 / S288c) GN=TAF5 PE=1 SV=1	1	5	5	1	4	1.5	8.1
296	P38130	7	7	Probable mannosyltransferase KTR3	KTR3	>sp|P38130|KTR3_YEAST Probable mannosyltransferase KTR3 OS=Saccharomyces cerevisiae (strain ATCC 204508 / S288c) GN=KTR3 PE=1 SV=1	1	7	7	1	7	2.2	18.8
297	P38137	7	7	Peroxisomal-coenzyme A synthetase	PCS60	>sp|P38137|FAT2_YEAST Peroxisomal-coenzyme A synthetase OS=Saccharomyces cerevisiae (strain ATCC 204508 / S288c) GN=PCS60 PE=1 SV=1	1	7	7	0	7	0	17.1
298	P38144	4	4	ISWI chromatin-remodeling complex ATPase ISW1	ISW1	>sp|P38144|ISW1_YEAST ISWI chromatin-remodeling complex ATPase ISW1 OS=Saccharomyces cerevisiae (strain ATCC 204508 / S288c) GN=ISW1 PE=1 SV=2	1	4	4	4	0	4.3	0
299	P38153	1	1	AP-3 complex subunit mu	APM3	>sp|P38153|AP3M_YEAST AP-3 complex subunit mu OS=Saccharomyces cerevisiae (strain ATCC 204508 / S288c) GN=APM3 PE=1 SV=2	1	1	1	0	1	0	3.1
300	P38170	2	2	Condensin complex subunit 2	BRN1	>sp|P38170|CND2_YEAST Condensin complex subunit 2 OS=Saccharomyces cerevisiae (strain ATCC 204508 / S288c) GN=BRN1 PE=1 SV=3	1	2	2	1	1	1.5	1.5
301	P38174	4	4	Methionine aminopeptidase 2	MAP2	>sp|P38174|AMPM2_YEAST Methionine aminopeptidase 2 OS=Saccharomyces cerevisiae (strain ATCC 204508 / S288c) GN=MAP2 PE=1 SV=4	1	4	4	4	3	13.1	10.7
302	P38177	4	4	Uncharacterized protein YBL086C		>sp|P38177|YBI6_YEAST Uncharacterized protein YBL086C OS=Saccharomyces cerevisiae (strain ATCC 204508 / S288c) GN=YBL086C PE=1 SV=1	1	4	4	4	0	11.6	0
303	P38180	1	1	Uncharacterized protein YBL081W		>sp|P38180|YBI1_YEAST Uncharacterized protein YBL081W OS=Saccharomyces cerevisiae (strain ATCC 204508 / S288c) GN=YBL081W PE=2 SV=1	1	1	1	1	0	4.3	0
304	P38205	6	6	Multisite-specific tRNA:(cytosine-C(5))-methyltransferase	NCL1	>sp|P38205|NCL1_YEAST Multisite-specific tRNA:(cytosine-C(5))-methyltransferase OS=Saccharomyces cerevisiae (strain ATCC 204508 / S288c) GN=NCL1 PE=1 SV=1	1	6	6	1	6	2.2	13.9
305	P38208	1	1	Ribonucleases P/MRP protein subunit POP8	POP8	>sp|P38208|POP8_YEAST Ribonucleases P/MRP protein subunit POP8 OS=Saccharomyces cerevisiae (strain ATCC 204508 / S288c) GN=POP8 PE=1 SV=1	1	1	1	0	1	0	6
306	P38250	23	23	Increased sodium tolerance protein 2	IST2	>sp|P38250|IST2_YEAST Increased sodium tolerance protein 2 OS=Saccharomyces cerevisiae (strain ATCC 204508 / S288c) GN=IST2 PE=1 SV=2	1	23	23	11	23	13.7	26.3
307	P38256	1	1	Uncharacterized protein YBR096W		>sp|P38256|YBU6_YEAST Uncharacterized protein YBR096W OS=Saccharomyces cerevisiae (strain ATCC 204508 / S288c) GN=YBR096W PE=1 SV=1	1	1	1	0	1	0	7
308	P38264	8	8	Inorganic phosphate transport protein PHO88	PHO88	>sp|P38264|PHO88_YEAST Inorganic phosphate transport protein PHO88 OS=Saccharomyces cerevisiae (strain ATCC 204508 / S288c) GN=PHO88 PE=1 SV=1	1	8	8	5	8	25.5	39.4
309	P38271	30	30	Protein OPY1	OPY1	>sp|P38271|OPY1_YEAST Protein OPY1 OS=Saccharomyces cerevisiae (strain ATCC 204508 / S288c) GN=OPY1 PE=1 SV=1	1	30	30	29	29	83.8	83.5
310	P38289	2	2	Exonuclease V, mitochondrial	EXO5	>sp|P38289|EXO5_YEAST Exonuclease V, mitochondrial OS=Saccharomyces cerevisiae (strain ATCC 204508 / S288c) GN=EXO5 PE=1 SV=1	1	2	2	2	0	4.4	0
311	P38321	58	58	Uncharacterized protein YBR225W		>sp|P38321|YB75_YEAST Uncharacterized protein YBR225W OS=Saccharomyces cerevisiae (strain ATCC 204508 / S288c) GN=YBR225W PE=1 SV=1	1	58	58	56	55	60.2	59.8
312	P38325	3	3	Mitochondrial outer membrane protein OM14	OM14	>sp|P38325|OM14_YEAST Mitochondrial outer membrane protein OM14 OS=Saccharomyces cerevisiae (strain ATCC 204508 / S288c) GN=OM14 PE=1 SV=1	1	3	3	1	3	6	38.8
313	P38330	44	43	Protein RMD9-like, mitochondrial		>sp|P38330|RMD9L_YEAST Protein RMD9-like, mitochondrial OS=Saccharomyces cerevisiae (strain ATCC 204508 / S288c) GN=YBR238C PE=1 SV=1	1	44	43	41	43	56.8	62.5
314	P38335	10	10	Maintenance of telomere capping protein 4	MTC4	>sp|P38335|MTC4_YEAST Maintenance of telomere capping protein 4 OS=Saccharomyces cerevisiae (strain ATCC 204508 / S288c) GN=MTC4 PE=1 SV=1	1	10	10	9	4	17.3	7.6
315	P38359	2	2	Sulfate permease 1	SUL1	>sp|P38359|SUL1_YEAST Sulfate permease 1 OS=Saccharomyces cerevisiae (strain ATCC 204508 / S288c) GN=SUL1 PE=1 SV=2	1	2	2	1	1	2.2	0.9
316	P38427	4;1	4;1	Trehalose synthase complex regulatory subunit TSL1	TSL1	>sp|P38427|TSL1_YEAST Trehalose synthase complex regulatory subunit TSL1 OS=Saccharomyces cerevisiae (strain ATCC 204508 / S288c) GN=TSL1 PE=1 SV=1	2	4	4	0	4	0	5
317	P38430	1	1	Uncharacterized deoxyribonuclease YMR262W		>sp|P38430|YM8C_YEAST Uncharacterized deoxyribonuclease YMR262W OS=Saccharomyces cerevisiae (strain ATCC 204508 / S288c) GN=YMR262W PE=1 SV=3	1	1	1	1	1	2.2	2.2
318	P38615	1	1	Serine/threonine-protein kinase RIM11/MSD1	RIM11	>sp|P38615|RIM11_YEAST Serine/threonine-protein kinase RIM11/MSD1 OS=Saccharomyces cerevisiae (strain ATCC 204508 / S288c) GN=RIM11 PE=1 SV=1	1	1	1	0	1	0	2.4
319	P38625	3	3	GMP synthase [glutamine-hydrolyzing]	GUA1	>sp|P38625|GUAA_YEAST GMP synthase [glutamine-hydrolyzing] OS=Saccharomyces cerevisiae (strain ATCC 204508 / S288c) GN=GUA1 PE=1 SV=4	1	3	3	1	3	1.9	5.5
320	P38626	11	11	NADH-cytochrome b5 reductase 1	CBR1	>sp|P38626|NCB5R_YEAST NADH-cytochrome b5 reductase 1 OS=Saccharomyces cerevisiae (strain ATCC 204508 / S288c) GN=CBR1 PE=1 SV=2	1	11	11	6	9	28.9	44
321	P38635	20	20	Histidinol-phosphatase	HIS2	>sp|P38635|HIS9_YEAST Histidinol-phosphatase OS=Saccharomyces cerevisiae (strain ATCC 204508 / S288c) GN=HIS2 PE=1 SV=2	1	20	20	19	20	41.8	50.7
322	P38691	15	15	Serine/threonine-protein kinase KSP1	KSP1	>sp|P38691|KSP1_YEAST Serine/threonine-protein kinase KSP1 OS=Saccharomyces cerevisiae (strain ATCC 204508 / S288c) GN=KSP1 PE=1 SV=1	1	15	15	14	6	19.2	9.3
323	P38708	2	2	Putative proline--tRNA ligase YHR020W	YHR020W	>sp|P38708|YHI0_YEAST Putative proline--tRNA ligase YHR020W OS=Saccharomyces cerevisiae (strain ATCC 204508 / S288c) GN=YHR020W PE=1 SV=1	1	2	2	0	2	0	4.7
324	P38713	20	20	Oxysterol-binding protein homolog 3	OSH3	>sp|P38713|OSH3_YEAST Oxysterol-binding protein homolog 3 OS=Saccharomyces cerevisiae (strain ATCC 204508 / S288c) GN=OSH3 PE=1 SV=1	1	20	20	20	0	26.6	0
325	P38736	2	2	Golgi SNAP receptor complex member 1	GOS1	>sp|P38736|GOSR1_YEAST Golgi SNAP receptor complex member 1 OS=Saccharomyces cerevisiae (strain ATCC 204508 / S288c) GN=GOS1 PE=1 SV=1	1	2	2	1	2	7.2	14.8
326	P38741	4	4	Meiotic activator RIM4	RIM4	>sp|P38741|RIM4_YEAST Meiotic activator RIM4 OS=Saccharomyces cerevisiae (strain ATCC 204508 / S288c) GN=RIM4 PE=1 SV=1	1	4	4	4	2	9.5	4.9
327	P38742	33;1	33;1	Nitrogen permease regulator 3	NPR3	>sp|P38742|NPR3_YEAST Nitrogen permease regulator 3 OS=Saccharomyces cerevisiae (strain ATCC 204508 / S288c) GN=NPR3 PE=1 SV=1	2	33	33	31	31	32.3	32.1
328	P38744	10	10	Putative pterin-4-alpha-carbinolamine dehydratase	YHL018W	>sp|P38744|PHS_YEAST Putative pterin-4-alpha-carbinolamine dehydratase OS=Saccharomyces cerevisiae (strain ATCC 204508 / S288c) GN=YHL018W PE=1 SV=1	1	10	10	10	6	80	50.8
329	P38746	1	1	Putative GTP-binding protein YLF2	YLF2	>sp|P38746|YLF2_YEAST Putative GTP-binding protein YLF2 OS=Saccharomyces cerevisiae (strain ATCC 204508 / S288c) GN=YLF2 PE=1 SV=1	1	1	1	1	0	4	0
330	P38764	1	1	26S proteasome regulatory subunit RPN1	RPN1	>sp|P38764|RPN1_YEAST 26S proteasome regulatory subunit RPN1 OS=Saccharomyces cerevisiae (strain ATCC 204508 / S288c) GN=RPN1 PE=1 SV=3	1	1	1	1	0	1.5	0
331	P38793	17	17	tRNA (guanine(37)-N1)-methyltransferase	TRM5	>sp|P38793|TRM5_YEAST tRNA (guanine(37)-N1)-methyltransferase OS=Saccharomyces cerevisiae (strain ATCC 204508 / S288c) GN=TRM5 PE=1 SV=1	1	17	17	17	5	36.9	13.4
332	P38800	1	1	Uncharacterized protein YHR080C	YHR080C	>sp|P38800|YHO0_YEAST Uncharacterized protein YHR080C OS=Saccharomyces cerevisiae (strain ATCC 204508 / S288c) GN=YHR080C PE=1 SV=1	1	1	1	0	1	0	1
333	P38809	17	17	Uncharacterized protein YHR097C	YHR097C	>sp|P38809|YHP7_YEAST Uncharacterized protein YHR097C OS=Saccharomyces cerevisiae (strain ATCC 204508 / S288c) GN=YHR097C PE=1 SV=1	1	17	17	17	5	49.7	20.5
334	P38817	4	4	ADP-ribosylation factor-binding protein GGA2	GGA2	>sp|P38817|GGA2_YEAST ADP-ribosylation factor-binding protein GGA2 OS=Saccharomyces cerevisiae (strain ATCC 204508 / S288c) GN=GGA2 PE=1 SV=1	1	4	4	1	3	2.7	7.5
335	P38821	4	4	Aspartyl aminopeptidase 4	APE4	>sp|P38821|DNPEP_YEAST Aspartyl aminopeptidase 4 OS=Saccharomyces cerevisiae (strain ATCC 204508 / S288c) GN=APE4 PE=1 SV=1	1	4	4	3	1	8	2.9
336	P38826	1	1	Origin recognition complex subunit 6	ORC6	>sp|P38826|ORC6_YEAST Origin recognition complex subunit 6 OS=Saccharomyces cerevisiae (strain ATCC 204508 / S288c) GN=ORC6 PE=1 SV=2	1	1	1	0	1	0	2.3
337	P38836	12	12	Putative metallocarboxypeptidase ECM14	ECM14	>sp|P38836|ECM14_YEAST Putative metallocarboxypeptidase ECM14 OS=Saccharomyces cerevisiae (strain ATCC 204508 / S288c) GN=ECM14 PE=1 SV=1	1	12	12	12	7	36.5	17
338	P38837	1	1	Protein NSG1	NSG1	>sp|P38837|NSG1_YEAST Protein NSG1 OS=Saccharomyces cerevisiae (strain ATCC 204508 / S288c) GN=NSG1 PE=1 SV=1	1	1	1	0	1	0	5.8
339	P38850	1	1	Regulator of Ty1 transposition protein 107	RTT107	>sp|P38850|RT107_YEAST Regulator of Ty1 transposition protein 107 OS=Saccharomyces cerevisiae (strain ATCC 204508 / S288c) GN=RTT107 PE=1 SV=1	1	1	1	1	0	2.6	0
340	P38861	8	8	60S ribosomal export protein NMD3	NMD3	>sp|P38861|NMD3_YEAST 60S ribosomal export protein NMD3 OS=Saccharomyces cerevisiae (strain ATCC 204508 / S288c) GN=NMD3 PE=1 SV=3	1	8	8	1	8	2.7	19.9
341	P38870	1	1	Uncharacterized protein YHR182W	YHR182W	>sp|P38870|YHY2_YEAST Uncharacterized protein YHR182W OS=Saccharomyces cerevisiae (strain ATCC 204508 / S288c) GN=YHR182W PE=1 SV=1	1	1	1	1	1	1.3	1.3
342	P38904	36	36	Protein SPP41	SPP41	>sp|P38904|SPP41_YEAST Protein SPP41 OS=Saccharomyces cerevisiae (strain ATCC 204508 / S288c) GN=SPP41 PE=1 SV=2	1	36	36	36	0	32.6	0
343	P38915	1	1	Transcription factor SPT8	SPT8	>sp|P38915|SPT8_YEAST Transcription factor SPT8 OS=Saccharomyces cerevisiae (strain ATCC 204508 / S288c) GN=SPT8 PE=1 SV=1	1	1	1	1	0	3	0
344	P38970	43	43	Serine/threonine-protein kinase HAL5	HAL5	>sp|P38970|HAL5_YEAST Serine/threonine-protein kinase HAL5 OS=Saccharomyces cerevisiae (strain ATCC 204508 / S288c) GN=HAL5 PE=1 SV=2	1	43	43	42	40	52.9	51.1
345	P38989	1	1	Structural maintenance of chromosomes protein 2	SMC2	>sp|P38989|SMC2_YEAST Structural maintenance of chromosomes protein 2 OS=Saccharomyces cerevisiae (strain ATCC 204508 / S288c) GN=SMC2 PE=1 SV=1	1	1	1	1	0	0.9	0
346	P38993	8	8	Iron transport multicopper oxidase FET3	FET3	>sp|P38993|FET3_YEAST Iron transport multicopper oxidase FET3 OS=Saccharomyces cerevisiae (strain ATCC 204508 / S288c) GN=FET3 PE=1 SV=2	1	8	8	6	7	14.2	15.1
347	P38994	45	45	Probable phosphatidylinositol 4-phosphate 5-kinase MSS4	MSS4	>sp|P38994|MSS4_YEAST Probable phosphatidylinositol 4-phosphate 5-kinase MSS4 OS=Saccharomyces cerevisiae (strain ATCC 204508 / S288c) GN=MSS4 PE=1 SV=2	1	45	45	45	32	60.6	48.3
348	P38995	1	1	Copper-transporting ATPase	CCC2	>sp|P38995|ATU2_YEAST Copper-transporting ATPase OS=Saccharomyces cerevisiae (strain ATCC 204508 / S288c) GN=CCC2 PE=1 SV=1	1	1	1	1	1	1.5	1.5
349	P39006	10	10	Phosphatidylserine decarboxylase proenzyme 1, mitochondrial;Phosphatidylserine decarboxylase 1 beta chain;Phosphatidylserine decarboxylase 1 alpha chain	PSD1	>sp|P39006|PSD1_YEAST Phosphatidylserine decarboxylase proenzyme 1, mitochondrial OS=Saccharomyces cerevisiae (strain ATCC 204508 / S288c) GN=PSD1 PE=1 SV=1	1	10	10	6	8	19.2	21.8
350	P39016	24	24	Suppressor protein MPT5	MPT5	>sp|P39016|MPT5_YEAST Suppressor protein MPT5 OS=Saccharomyces cerevisiae (strain ATCC 204508 / S288c) GN=MPT5 PE=1 SV=2	1	24	24	16	24	23.2	38.5
351	P39073	4	4	Meiotic mRNA stability protein kinase SSN3	SSN3	>sp|P39073|SSN3_YEAST Meiotic mRNA stability protein kinase SSN3 OS=Saccharomyces cerevisiae (strain ATCC 204508 / S288c) GN=SSN3 PE=1 SV=3	1	4	4	2	2	3.8	6.5
352	P39083	1	1	Rho-type GTPase-activating protein 1	RGA1	>sp|P39083|RGA1_YEAST Rho-type GTPase-activating protein 1 OS=Saccharomyces cerevisiae (strain ATCC 204508 / S288c) GN=RGA1 PE=1 SV=1	1	1	1	1	0	0.9	0
353	P39102	1	1	DnaJ protein homolog XDJ1	XDJ1	>sp|P39102|XDJ1_YEAST DnaJ protein homolog XDJ1 OS=Saccharomyces cerevisiae (strain ATCC 204508 / S288c) GN=XDJ1 PE=1 SV=2	1	1	1	1	0	3.5	0
354	P39106	1	1	Alpha-1,3-mannosyltransferase MNN1	MNN1	>sp|P39106|MNN1_YEAST Alpha-1,3-mannosyltransferase MNN1 OS=Saccharomyces cerevisiae (strain ATCC 204508 / S288c) GN=MNN1 PE=1 SV=1	1	1	1	1	1	2.1	2.1
355	P39107	4	4	Mannan polymerase complexes subunit MNN9	MNN9	>sp|P39107|MNN9_YEAST Mannan polymerase complexes subunit MNN9 OS=Saccharomyces cerevisiae (strain ATCC 204508 / S288c) GN=MNN9 PE=1 SV=3	1	4	4	2	3	5.3	7.6
356	P39109	1	1	Metal resistance protein YCF1	YCF1	>sp|P39109|YCFI_YEAST Metal resistance protein YCF1 OS=Saccharomyces cerevisiae (strain ATCC 204508 / S288c) GN=YCF1 PE=1 SV=2	1	1	1	1	0	0.5	0
357	P39517	7	7	ATP-dependent RNA helicase DHH1	DHH1	>sp|P39517|DHH1_YEAST ATP-dependent RNA helicase DHH1 OS=Saccharomyces cerevisiae (strain ATCC 204508 / S288c) GN=DHH1 PE=1 SV=1	1	7	7	5	6	10.5	13.4
358	P39548	1	1	DUP240 protein YAR028W		>sp|P39548|YAJ8_YEAST DUP240 protein YAR028W OS=Saccharomyces cerevisiae (strain ATCC 204508 / S288c) GN=YAR028W PE=1 SV=1	1	1	1	1	0	5.1	0
359	P39676	10	10	Flavohemoprotein	YHB1	>sp|P39676|FHP_YEAST Flavohemoprotein OS=Saccharomyces cerevisiae (strain ATCC 204508 / S288c) GN=YHB1 PE=1 SV=2	1	10	10	9	8	33.1	31.1
360	P39685	1	1	Nucleoporin POM152	POM152	>sp|P39685|PO152_YEAST Nucleoporin POM152 OS=Saccharomyces cerevisiae (strain ATCC 204508 / S288c) GN=POM152 PE=1 SV=1	1	1	1	1	1	1.2	1.2
361	P39713	8	8	Probable diacetyl reductase [(R)-acetoin forming] 2	BDH2	>sp|P39713|BDH2_YEAST Probable diacetyl reductase [(R)-acetoin forming] 2 OS=Saccharomyces cerevisiae (strain ATCC 204508 / S288c) GN=BDH2 PE=1 SV=1	1	8	8	6	7	15.3	16.1
362	P39714	13	13	Diacetyl reductase [(R)-acetoin forming]	BDH1	>sp|P39714|BDH1_YEAST Diacetyl reductase [(R)-acetoin forming] OS=Saccharomyces cerevisiae (strain ATCC 204508 / S288c) GN=BDH1 PE=1 SV=2	1	13	13	13	3	40.1	10.7
363	P39727	20	20	ER-derived vesicles protein ERV46	ERV46	>sp|P39727|ERV46_YEAST ER-derived vesicles protein ERV46 OS=Saccharomyces cerevisiae (strain ATCC 204508 / S288c) GN=ERV46 PE=1 SV=2	1	20	20	16	19	45.5	54
364	P39730	3	3	Eukaryotic translation initiation factor 5B	FUN12	>sp|P39730|IF2P_YEAST Eukaryotic translation initiation factor 5B OS=Saccharomyces cerevisiae (strain ATCC 204508 / S288c) GN=FUN12 PE=1 SV=2	1	3	3	2	1	2.1	2.1
365	P39925;P40341	2;1	2;1	Mitochondrial respiratory chain complexes assembly protein AFG3;Mitochondrial respiratory chain complexes assembly protein YTA12	AFG3;YTA12	>sp|P39925|AFG3_YEAST Mitochondrial respiratory chain complexes assembly protein AFG3 OS=Saccharomyces cerevisiae (strain ATCC 204508 / S288c) GN=AFG3 PE=1 SV=1;>sp|P40341|YTA12_YEAST Mitochondrial respiratory chain complexes assembly protein YTA12 OS=Sacc	2	2	2	1	1	1.7	1.6
366	P39926	3	3	Protein SSO2	SSO2	>sp|P39926|SSO2_YEAST Protein SSO2 OS=Saccharomyces cerevisiae (strain ATCC 204508 / S288c) GN=SSO2 PE=1 SV=2	1	3	3	0	3	0	16.3
367	P39931	10	10	Protein SSP120	SSP120	>sp|P39931|SS120_YEAST Protein SSP120 OS=Saccharomyces cerevisiae (strain ATCC 204508 / S288c) GN=SSP120 PE=1 SV=1	1	10	10	9	10	25.2	27.8
368	P39933	18	18	Transcription factor IIIA	PZF1	>sp|P39933|TF3A_YEAST Transcription factor IIIA OS=Saccharomyces cerevisiae (strain ATCC 204508 / S288c) GN=PZF1 PE=1 SV=1	1	18	18	18	9	53.4	26.8
369	P39938;P39939	2;2	2;2	40S ribosomal protein S26-A;40S ribosomal protein S26-B	RPS26A;RPS26B	>sp|P39938|RS26A_YEAST 40S ribosomal protein S26-A OS=Saccharomyces cerevisiae (strain ATCC 204508 / S288c) GN=RPS26A PE=1 SV=1;>sp|P39939|RS26B_YEAST 40S ribosomal protein S26-B OS=Saccharomyces cerevisiae (strain ATCC 204508 / S288c) GN=RPS26B PE=1 SV=1	2	2	2	0	2	0	20.2
370	P39944	2	2	Ubiquitin carboxyl-terminal hydrolase 5	UBP5	>sp|P39944|UBP5_YEAST Ubiquitin carboxyl-terminal hydrolase 5 OS=Saccharomyces cerevisiae (strain ATCC 204508 / S288c) GN=UBP5 PE=1 SV=1	1	2	2	2	0	2.6	0
371	P39945	1	1	Protein AST2	AST2	>sp|P39945|AST2_YEAST Protein AST2 OS=Saccharomyces cerevisiae (strain ATCC 204508 / S288c) GN=AST2 PE=1 SV=1	1	1	1	0	1	0	3
372	P39946	4	4	Nuclear distribution protein PAC1	PAC1	>sp|P39946|LIS1_YEAST Nuclear distribution protein PAC1 OS=Saccharomyces cerevisiae (strain ATCC 204508 / S288c) GN=PAC1 PE=1 SV=2	1	4	4	4	0	9.1	0
373	P39952	1	1	Mitochondrial inner membrane protein OXA1	OXA1	>sp|P39952|OXA1_YEAST Mitochondrial inner membrane protein OXA1 OS=Saccharomyces cerevisiae (strain ATCC 204508 / S288c) GN=OXA1 PE=1 SV=1	1	1	1	1	0	4.5	0
374	P39953	1	1	Mitochondrial nicotinamide adenine dinucleotide transporter 2	YEA6	>sp|P39953|YEA6_YEAST Mitochondrial nicotinamide adenine dinucleotide transporter 2 OS=Saccharomyces cerevisiae (strain ATCC 204508 / S288c) GN=YEA6 PE=1 SV=1	1	1	1	1	0	5.1	0
375	P39954	12	12	Adenosylhomocysteinase	SAH1	>sp|P39954|SAHH_YEAST Adenosylhomocysteinase OS=Saccharomyces cerevisiae (strain ATCC 204508 / S288c) GN=SAH1 PE=1 SV=1	1	12	12	7	11	19.2	27.2
376	P39960	108	108	GTPase-activating protein BEM2/IPL2	BEM2	>sp|P39960|BEM2_YEAST GTPase-activating protein BEM2/IPL2 OS=Saccharomyces cerevisiae (strain ATCC 204508 / S288c) GN=BEM2 PE=1 SV=1	1	108	108	67	107	38	57.8
377	P39967	13;1	13;1	Ubiquitin carboxyl-terminal hydrolase 9	UBP9	>sp|P39967|UBP9_YEAST Ubiquitin carboxyl-terminal hydrolase 9 OS=Saccharomyces cerevisiae (strain ATCC 204508 / S288c) GN=UBP9 PE=1 SV=1	2	13	13	10	10	15.4	16.2
378	P39969	3	1	Protein BOI2	BOI2	>sp|P39969|BOI2_YEAST Protein BOI2 OS=Saccharomyces cerevisiae (strain ATCC 204508 / S288c) GN=BOI2 PE=1 SV=1	1	3	1	3	0	2.4	0
379	P39970	1	1	ATF/CREB activator 1	ACA1	>sp|P39970|ACA1_YEAST ATF/CREB activator 1 OS=Saccharomyces cerevisiae (strain ATCC 204508 / S288c) GN=ACA1 PE=1 SV=1	1	1	1	0	1	0	1.6
380	P39976	8	8	D-lactate dehydrogenase [cytochrome] 3	DLD3	>sp|P39976|DLD3_YEAST D-lactate dehydrogenase [cytochrome] 3 OS=Saccharomyces cerevisiae (strain ATCC 204508 / S288c) GN=DLD3 PE=1 SV=1	1	8	8	8	2	20.8	6.5
381	P39986	1	1	Probable cation-transporting ATPase 1	SPF1	>sp|P39986|ATC6_YEAST Probable cation-transporting ATPase 1 OS=Saccharomyces cerevisiae (strain ATCC 204508 / S288c) GN=SPF1 PE=1 SV=1	1	1	1	1	0	2.1	0
382	P39991	2	2	Uncharacterized protein YEL025C	YEL025C	>sp|P39991|YEC5_YEAST Uncharacterized protein YEL025C OS=Saccharomyces cerevisiae (strain ATCC 204508 / S288c) GN=YEL025C PE=2 SV=1	1	2	2	1	1	0.8	0.9
383	P40002	9;1	9;1	Uncharacterized protein YEL007W	YEL007W	>sp|P40002|YEA7_YEAST Uncharacterized protein YEL007W OS=Saccharomyces cerevisiae (strain ATCC 204508 / S288c) GN=YEL007W PE=1 SV=1	2	9	9	9	2	19.8	4.1
384	P40017	15	15	Carnitine O-acetyltransferase YAT2	YAT2	>sp|P40017|YAT2_YEAST Carnitine O-acetyltransferase YAT2 OS=Saccharomyces cerevisiae (strain ATCC 204508 / S288c) GN=YAT2 PE=1 SV=1	1	15	15	11	9	16.1	10.3
385	P40020	4	4	Factor interacting with REF2	FIR1	>sp|P40020|FIR1_YEAST Factor interacting with REF2 OS=Saccharomyces cerevisiae (strain ATCC 204508 / S288c) GN=FIR1 PE=1 SV=3	1	4	4	4	0	4.7	0
386	P40024	6	6	ABC transporter ATP-binding protein ARB1	ARB1	>sp|P40024|ARB1_YEAST ABC transporter ATP-binding protein ARB1 OS=Saccharomyces cerevisiae (strain ATCC 204508 / S288c) GN=ARB1 PE=1 SV=1	1	6	6	0	6	0	12
387	P40041	11;2	11;2	Putative transcription factor YER064C	YER064C	>sp|P40041|YEP4_YEAST Putative transcription factor YER064C OS=Saccharomyces cerevisiae (strain ATCC 204508 / S288c) GN=YER064C PE=1 SV=1	2	11	11	11	1	29.1	2
388	P40043	14	13	Respiratory growth induced protein 1	RGI1	>sp|P40043|RGI1_YEAST Respiratory growth induced protein 1 OS=Saccharomyces cerevisiae (strain ATCC 204508 / S288c) GN=RGI1 PE=1 SV=1	1	14	13	11	13	81.4	86.3
389	P40055	18	18	U3 small nucleolar RNA-associated protein 7	UTP7	>sp|P40055|UTP7_YEAST U3 small nucleolar RNA-associated protein 7 OS=Saccharomyces cerevisiae (strain ATCC 204508 / S288c) GN=UTP7 PE=1 SV=1	1	18	18	18	0	43.3	0
390	P40056	1	1	Golgi to ER traffic protein 2	GET2	>sp|P40056|GET2_YEAST Golgi to ER traffic protein 2 OS=Saccharomyces cerevisiae (strain ATCC 204508 / S288c) GN=GET2 PE=1 SV=2	1	1	1	0	1	0	7.7
391	P40059	37	36	Transcriptional regulatory protein DOT6	DOT6	>sp|P40059|DOT6_YEAST Transcriptional regulatory protein DOT6 OS=Saccharomyces cerevisiae (strain ATCC 204508 / S288c) GN=DOT6 PE=1 SV=1	1	37	36	24	37	51.2	60.7
392	P40099	6	6	5-formyltetrahydrofolate cyclo-ligase	FAU1	>sp|P40099|FTHC_YEAST 5-formyltetrahydrofolate cyclo-ligase OS=Saccharomyces cerevisiae (strain ATCC 204508 / S288c) GN=FAU1 PE=1 SV=1	1	6	6	4	3	22.3	22.7
393	P40187	23	23	GSY2-interacting protein PIG2	PIG2	>sp|P40187|PIG2_YEAST GSY2-interacting protein PIG2 OS=Saccharomyces cerevisiae (strain ATCC 204508 / S288c) GN=PIG2 PE=1 SV=1	1	23	23	22	16	36.1	30.3
394	P40212;Q12690	3;2	3;2	60S ribosomal protein L13-B;60S ribosomal protein L13-A	RPL13B;RPL13A	>sp|P40212|RL13B_YEAST 60S ribosomal protein L13-B OS=Saccharomyces cerevisiae (strain ATCC 204508 / S288c) GN=RPL13B PE=1 SV=1;>sp|Q12690|RL13A_YEAST 60S ribosomal protein L13-A OS=Saccharomyces cerevisiae (strain ATCC 204508 / S288c) GN=RPL13A PE=1 SV=1	2	3	3	2	1	12.6	14.6
395	P40316	1	1	Securin	PDS1	>sp|P40316|SECU_YEAST Securin OS=Saccharomyces cerevisiae (strain ATCC 204508 / S288c) GN=PDS1 PE=1 SV=1	1	1	1	0	1	0	4
396	P40317	1	1	Protein SOK1	SOK1	>sp|P40317|SOK1_YEAST Protein SOK1 OS=Saccharomyces cerevisiae (strain ATCC 204508 / S288c) GN=SOK1 PE=1 SV=2	1	1	1	0	1	0	3.1
397	P40319	1	1	Elongation of fatty acids protein 3	SUR4	>sp|P40319|ELO3_YEAST Elongation of fatty acids protein 3 OS=Saccharomyces cerevisiae (strain ATCC 204508 / S288c) GN=SUR4 PE=1 SV=1	1	1	1	1	1	4.9	4.9
398	P40328	1	1	Probable 26S protease subunit YTA6	YTA6	>sp|P40328|TBP6_YEAST Probable 26S protease subunit YTA6 OS=Saccharomyces cerevisiae (strain ATCC 204508 / S288c) GN=YTA6 PE=1 SV=2	1	1	1	0	1	0	1.1
399	P40345	12	12	Phospholipid:diacylglycerol acyltransferase	LRO1	>sp|P40345|PDAT_YEAST Phospholipid:diacylglycerol acyltransferase OS=Saccharomyces cerevisiae (strain ATCC 204508 / S288c) GN=LRO1 PE=1 SV=1	1	12	12	12	6	22.5	10.6
400	P40360	2	2	Amino-acid acetyltransferase, mitochondrial	ARG2	>sp|P40360|NAGS_YEAST Amino-acid acetyltransferase, mitochondrial OS=Saccharomyces cerevisiae (strain ATCC 204508 / S288c) GN=ARG2 PE=1 SV=1	1	2	2	2	0	4.9	0
401	P40445	1	1	Uncharacterized transporter YIL166C	YIL166C	>sp|P40445|YIQ6_YEAST Uncharacterized transporter YIL166C OS=Saccharomyces cerevisiae (strain ATCC 204508 / S288c) GN=YIL166C PE=1 SV=1	1	1	1	1	0	4.2	0
402	P40454	13	13	Serine/threonine-protein phosphatase 2A activator 1	RRD1	>sp|P40454|PTPA1_YEAST Serine/threonine-protein phosphatase 2A activator 1 OS=Saccharomyces cerevisiae (strain ATCC 204508 / S288c) GN=RRD1 PE=1 SV=1	1	13	13	9	11	34.6	27.7
403	P40462	5	5	Protein TMA108	TMA108	>sp|P40462|TM108_YEAST Protein TMA108 OS=Saccharomyces cerevisiae (strain ATCC 204508 / S288c) GN=TMA108 PE=1 SV=1	1	5	5	3	5	2.7	4.4
404	P40468	3	3	Cell morphogenesis protein PAG1	TAO3	>sp|P40468|TAO3_YEAST Cell morphogenesis protein PAG1 OS=Saccharomyces cerevisiae (strain ATCC 204508 / S288c) GN=TAO3 PE=1 SV=1	1	3	3	0	3	0	1.3
405	P40469	1	1	DNA repair/transcription protein MET18/MMS19	MET18	>sp|P40469|MET18_YEAST DNA repair/transcription protein MET18/MMS19 OS=Saccharomyces cerevisiae (strain ATCC 204508 / S288c) GN=MET18 PE=1 SV=1	1	1	1	1	1	1.4	1.4
406	P40487	1	1	Diphthamide biosynthesis protein 1	DPH1	>sp|P40487|DPH1_YEAST Diphthamide biosynthesis protein 1 OS=Saccharomyces cerevisiae (strain ATCC 204508 / S288c) GN=DPH1 PE=1 SV=1	1	1	1	1	0	2.8	0
407	P40514	1	1	Uncharacterized protein YIL067C	YIL067C	>sp|P40514|YIG7_YEAST Uncharacterized protein YIL067C OS=Saccharomyces cerevisiae (strain ATCC 204508 / S288c) GN=YIL067C PE=1 SV=1	1	1	1	1	0	2.1	0
408	P40540	3	3	ER membrane protein complex subunit 5	KRE27	>sp|P40540|EMC5_YEAST ER membrane protein complex subunit 5 OS=Saccharomyces cerevisiae (strain ATCC 204508 / S288c) GN=KRE27 PE=1 SV=1	1	3	3	2	3	15.6	22
409	P40548	1	1	HSP70 co-chaperone SNL1	SNL1	>sp|P40548|SNL1_YEAST HSP70 co-chaperone SNL1 OS=Saccharomyces cerevisiae (strain ATCC 204508 / S288c) GN=SNL1 PE=1 SV=1	1	1	1	0	1	0	10.7
410	P41318	5	5	Target of rapamycin complex subunit LST8	LST8	>sp|P41318|LST8_YEAST Target of rapamycin complex subunit LST8 OS=Saccharomyces cerevisiae (strain ATCC 204508 / S288c) GN=LST8 PE=1 SV=1	1	5	5	5	1	22.8	3.6
411	P41698	1	1	Bud site selection protein 8	BUD8	>sp|P41698|BUD8_YEAST Bud site selection protein 8 OS=Saccharomyces cerevisiae (strain ATCC 204508 / S288c) GN=BUD8 PE=1 SV=2	1	1	1	1	0	2	0
412	P41735	13	13	Catabolite repression protein CAT5	CAT5	>sp|P41735|CAT5_YEAST Catabolite repression protein CAT5 OS=Saccharomyces cerevisiae (strain ATCC 204508 / S288c) GN=CAT5 PE=1 SV=2	1	13	13	12	11	63.1	57.9
413	P41800	1	1	Maintenance of mitochondrial morphology protein 1	MMM1	>sp|P41800|MMM1_YEAST Maintenance of mitochondrial morphology protein 1 OS=Saccharomyces cerevisiae (strain ATCC 204508 / S288c) GN=MMM1 PE=1 SV=2	1	1	1	0	1	0	2.6
414	P41805	6	6	60S ribosomal protein L10	RPL10	>sp|P41805|RL10_YEAST 60S ribosomal protein L10 OS=Saccharomyces cerevisiae (strain ATCC 204508 / S288c) GN=RPL10 PE=1 SV=1	1	6	6	3	6	16.7	26.2
415	P41807	6	6	V-type proton ATPase subunit H	VMA13	>sp|P41807|VATH_YEAST V-type proton ATPase subunit H OS=Saccharomyces cerevisiae (strain ATCC 204508 / S288c) GN=VMA13 PE=1 SV=1	1	6	6	4	6	11.3	16.3
416	P41895	3	3	Transcription initiation factor IIF subunit alpha	TFG1	>sp|P41895|T2FA_YEAST Transcription initiation factor IIF subunit alpha OS=Saccharomyces cerevisiae (strain ATCC 204508 / S288c) GN=TFG1 PE=1 SV=2	1	3	3	3	0	4.9	0
417	P41903	25	25	Peroxisomal acyl-coenzyme A thioester hydrolase 1	TES1	>sp|P41903|PTE1_YEAST Peroxisomal acyl-coenzyme A thioester hydrolase 1 OS=Saccharomyces cerevisiae (strain ATCC 204508 / S288c) GN=TES1 PE=1 SV=1	1	25	25	25	22	62.8	58.7
418	P41911	33	31	Glycerol-3-phosphate dehydrogenase [NAD(+)] 2, mitochondrial	GPD2	>sp|P41911|GPD2_YEAST Glycerol-3-phosphate dehydrogenase [NAD(+)] 2, mitochondrial OS=Saccharomyces cerevisiae (strain ATCC 204508 / S288c) GN=GPD2 PE=1 SV=2	1	33	31	32	31	72.7	67
419	P42839	4	4	Low affinity vacuolar monovalent cation/H(+) antiporter	VNX1	>sp|P42839|VNX1_YEAST Low affinity vacuolar monovalent cation/H(+) antiporter OS=Saccharomyces cerevisiae (strain ATCC 204508 / S288c) GN=VNX1 PE=1 SV=1	1	4	4	1	4	1.7	5.3
420	P42841	2	2	Polyadenylation factor subunit 2	PFS2	>sp|P42841|PFS2_YEAST Polyadenylation factor subunit 2 OS=Saccharomyces cerevisiae (strain ATCC 204508 / S288c) GN=PFS2 PE=1 SV=1	1	2	2	1	1	3.2	7.5
421	P42843	1	1	F-box protein SKP2	SKP2	>sp|P42843|SKP2_YEAST F-box protein SKP2 OS=Saccharomyces cerevisiae (strain ATCC 204508 / S288c) GN=SKP2 PE=1 SV=1	1	1	1	1	0	2.5	0
422	P42844	1	1	Mitochondrial protein import protein ZIM17	ZIM17	>sp|P42844|ZIM17_YEAST Mitochondrial protein import protein ZIM17 OS=Saccharomyces cerevisiae (strain ATCC 204508 / S288c) GN=ZIM17 PE=1 SV=2	1	1	1	1	0	6.3	0
423	P42845	1	1	Protein STB1	STB1	>sp|P42845|STB1_YEAST Protein STB1 OS=Saccharomyces cerevisiae (strain ATCC 204508 / S288c) GN=STB1 PE=1 SV=2	1	1	1	0	1	0	2.6
424	P42846	3	3	Protein KRI1	KRI1	>sp|P42846|KRI1_YEAST Protein KRI1 OS=Saccharomyces cerevisiae (strain ATCC 204508 / S288c) GN=KRI1 PE=1 SV=1	1	3	3	3	0	6.9	0
425	P42883;P43534;P47183;Q07748	1;1;1;1	1;1;1;1	Pyrimidine precursor biosynthesis enzyme THI12;Pyrimidine precursor biosynthesis enzyme THI5;Pyrimidine precursor biosynthesis enzyme THI11;Pyrimidine precursor biosynthesis enzyme THI13	THI12;THI5;THI11;THI13	>sp|P42883|THI12_YEAST Pyrimidine precursor biosynthesis enzyme THI12 OS=Saccharomyces cerevisiae (strain ATCC 204508 / S288c) GN=THI12 PE=3 SV=1;>sp|P43534|THI5_YEAST Pyrimidine precursor biosynthesis enzyme THI5 OS=Saccharomyces cerevisiae (strain ATCC 2	4	1	1	1	0	2.4	0
426	P42900	1	1	Sigma-like sequence protein 1, mitochondrial	SLS1	>sp|P42900|SLS1_YEAST Sigma-like sequence protein 1, mitochondrial OS=Saccharomyces cerevisiae (strain ATCC 204508 / S288c) GN=SLS1 PE=1 SV=1	1	1	1	0	1	0	4
427	P43124	1	1	Non-structural maintenance of chromosome element 4	NSE4	>sp|P43124|NSE4_YEAST Non-structural maintenance of chromosome element 4 OS=Saccharomyces cerevisiae (strain ATCC 204508 / S288c) GN=NSE4 PE=1 SV=1	1	1	1	1	0	5	0
428	P43132	1	1	COMPASS component BRE2	BRE2	>sp|P43132|BRE2_YEAST COMPASS component BRE2 OS=Saccharomyces cerevisiae (strain ATCC 204508 / S288c) GN=BRE2 PE=1 SV=2	1	1	1	1	1	1.8	1.8
429	P43556	2	2	Rho-GTPase-activating protein RGD2	RGD2	>sp|P43556|RGD2_YEAST Rho-GTPase-activating protein RGD2 OS=Saccharomyces cerevisiae (strain ATCC 204508 / S288c) GN=RGD2 PE=1 SV=1	1	2	2	1	1	3.4	1.1
430	P43561	22	22	Iron transport multicopper oxidase FET5	FET5	>sp|P43561|FET5_YEAST Iron transport multicopper oxidase FET5 OS=Saccharomyces cerevisiae (strain ATCC 204508 / S288c) GN=FET5 PE=1 SV=1	1	22	22	21	22	37.6	37.6
431	P43563	6	6	CBK1 kinase activator protein MOB2	MOB2	>sp|P43563|MOB2_YEAST CBK1 kinase activator protein MOB2 OS=Saccharomyces cerevisiae (strain ATCC 204508 / S288c) GN=MOB2 PE=1 SV=2	1	6	6	6	5	26.5	22.6
432	P43564	1	1	Uncharacterized membrane protein YFL034W	YFL034W	>sp|P43564|YFD4_YEAST Uncharacterized membrane protein YFL034W OS=Saccharomyces cerevisiae (strain ATCC 204508 / S288c) GN=YFL034W PE=1 SV=2	1	1	1	1	0	1.5	0
433	P43567	4	4	Alanine--glyoxylate aminotransferase 1	AGX1	>sp|P43567|AGX1_YEAST Alanine--glyoxylate aminotransferase 1 OS=Saccharomyces cerevisiae (strain ATCC 204508 / S288c) GN=AGX1 PE=1 SV=1	1	4	4	1	4	3.4	14.3
434	P43589	3	3	Pre-mRNA-splicing factor SAD1	SAD1	>sp|P43589|SAD1_YEAST Pre-mRNA-splicing factor SAD1 OS=Saccharomyces cerevisiae (strain ATCC 204508 / S288c) GN=SAD1 PE=1 SV=1	1	3	3	3	0	6.9	0
435	P43597	1	1	Uncharacterized protein YFR016C	YFR016C	>sp|P43597|YFI6_YEAST Uncharacterized protein YFR016C OS=Saccharomyces cerevisiae (strain ATCC 204508 / S288c) GN=YFR016C PE=1 SV=1	1	1	1	1	1	1.1	1.1
436	P43609	6	6	Chromatin structure-remodeling complex protein RSC8	RSC8	>sp|P43609|RSC8_YEAST Chromatin structure-remodeling complex protein RSC8 OS=Saccharomyces cerevisiae (strain ATCC 204508 / S288c) GN=RSC8 PE=1 SV=1	1	6	6	6	0	12.9	0
437	P43634	1	1	Activatory protein CHA4	CHA4	>sp|P43634|CHA4_YEAST Activatory protein CHA4 OS=Saccharomyces cerevisiae (strain ATCC 204508 / S288c) GN=CHA4 PE=1 SV=1	1	1	1	1	0	2.8	0
438	P43638	103	103	MAP-homologous protein 1	MHP1	>sp|P43638|MHP1_YEAST MAP-homologous protein 1 OS=Saccharomyces cerevisiae (strain ATCC 204508 / S288c) GN=MHP1 PE=1 SV=1	1	103	103	77	101	66.5	72.3
439	P46655	5	5	Glutamate--tRNA ligase, cytoplasmic	GUS1	>sp|P46655|SYEC_YEAST Glutamate--tRNA ligase, cytoplasmic OS=Saccharomyces cerevisiae (strain ATCC 204508 / S288c) GN=GUS1 PE=1 SV=3	1	5	5	0	5	0	9.5
440	P46670	1	1	Tubulin-specific chaperone C	CIN2	>sp|P46670|TBCC_YEAST Tubulin-specific chaperone C OS=Saccharomyces cerevisiae (strain ATCC 204508 / S288c) GN=CIN2 PE=1 SV=2	1	1	1	1	1	5.6	5.6
441	P46674	2	2	Nuclear mRNA export protein SAC3	SAC3	>sp|P46674|SAC3_YEAST Nuclear mRNA export protein SAC3 OS=Saccharomyces cerevisiae (strain ATCC 204508 / S288c) GN=SAC3 PE=1 SV=2	1	2	2	2	0	2	0
442	P46676	31;1	31;1	Suppressor of mar1-1 protein	SUM1	>sp|P46676|SUM1_YEAST Suppressor of mar1-1 protein OS=Saccharomyces cerevisiae (strain ATCC 204508 / S288c) GN=SUM1 PE=1 SV=2	2	31	31	31	0	47.6	0
443	P46678	8	8	Transcription factor TFIIIB component B	BDP1	>sp|P46678|TFC5_YEAST Transcription factor TFIIIB component B OS=Saccharomyces cerevisiae (strain ATCC 204508 / S288c) GN=BDP1 PE=1 SV=1	1	8	8	8	0	21.5	0
444	P46956	1	1	Inorganic phosphate transporter PHO86	PHO86	>sp|P46956|PHO86_YEAST Inorganic phosphate transporter PHO86 OS=Saccharomyces cerevisiae (strain ATCC 204508 / S288c) GN=PHO86 PE=1 SV=1	1	1	1	0	1	0	3.2
445	P46959	1	1	tRNA (adenine(58)-N(1))-methyltransferase catalytic subunit TRM61	GCD14	>sp|P46959|TRM61_YEAST tRNA (adenine(58)-N(1))-methyltransferase catalytic subunit TRM61 OS=Saccharomyces cerevisiae (strain ATCC 204508 / S288c) GN=GCD14 PE=1 SV=1	1	1	1	1	0	4.4	0
446	P46985	5	5	Probable alpha-1,6-mannosyltransferase MNN11	MNN11	>sp|P46985|MNN11_YEAST Probable alpha-1,6-mannosyltransferase MNN11 OS=Saccharomyces cerevisiae (strain ATCC 204508 / S288c) GN=MNN11 PE=1 SV=2	1	5	5	1	5	5.2	14.9
447	P47027	2	2	DNA replication regulator DPB11	DPB11	>sp|P47027|DPB11_YEAST DNA replication regulator DPB11 OS=Saccharomyces cerevisiae (strain ATCC 204508 / S288c) GN=DPB11 PE=1 SV=1	1	2	2	1	2	2.1	3.9
448	P47029	19	19	Arrestin-related trafficking adapter 3	ALY2	>sp|P47029|ALY2_YEAST Arrestin-related trafficking adapter 3 OS=Saccharomyces cerevisiae (strain ATCC 204508 / S288c) GN=ALY2 PE=1 SV=2	1	19	19	19	10	24.6	13.4
449	P47030	39;2	39;2	Protein TAX4	TAX4	>sp|P47030|TAX4_YEAST Protein TAX4 OS=Saccharomyces cerevisiae (strain ATCC 204508 / S288c) GN=TAX4 PE=1 SV=1	2	39	39	26	39	44.2	58.3
450	P47035	15	15	Nucleolar protein NET1	NET1	>sp|P47035|NET1_YEAST Nucleolar protein NET1 OS=Saccharomyces cerevisiae (strain ATCC 204508 / S288c) GN=NET1 PE=1 SV=1	1	15	15	15	0	14.1	0
451	P47037	2	2	Structural maintenance of chromosomes protein 3	SMC3	>sp|P47037|SMC3_YEAST Structural maintenance of chromosomes protein 3 OS=Saccharomyces cerevisiae (strain ATCC 204508 / S288c) GN=SMC3 PE=1 SV=1	1	2	2	2	0	2.7	0
452	P47043	12	12	Zinc-responsive transcriptional regulator ZAP1	ZAP1	>sp|P47043|ZAP1_YEAST Zinc-responsive transcriptional regulator ZAP1 OS=Saccharomyces cerevisiae (strain ATCC 204508 / S288c) GN=ZAP1 PE=1 SV=1	1	12	12	4	11	6.9	17.7
453	P47049	1	1	UBX domain-containing protein 6	UBX6	>sp|P47049|UBX6_YEAST UBX domain-containing protein 6 OS=Saccharomyces cerevisiae (strain ATCC 204508 / S288c) GN=UBX6 PE=1 SV=1	1	1	1	0	1	0	4.5
454	P47052	9	2	Succinate dehydrogenase [ubiquinone] flavoprotein subunit 2, mitochondrial		>sp|P47052|DHSX_YEAST Succinate dehydrogenase [ubiquinone] flavoprotein subunit 2, mitochondrial OS=Saccharomyces cerevisiae (strain ATCC 204508 / S288c) GN=YJL045W PE=1 SV=1	1	9	2	7	8	13.7	14.2
455	P47054	1	1	Nucleoporin NUP192	NUP192	>sp|P47054|NU192_YEAST Nucleoporin NUP192 OS=Saccharomyces cerevisiae (strain ATCC 204508 / S288c) GN=NUP192 PE=1 SV=1	1	1	1	0	1	0	1.2
456	P47068	24	24	Myosin tail region-interacting protein MTI1	BBC1	>sp|P47068|BBC1_YEAST Myosin tail region-interacting protein MTI1 OS=Saccharomyces cerevisiae (strain ATCC 204508 / S288c) GN=BBC1 PE=1 SV=2	1	24	24	22	14	27.8	18.7
457	P47074	1	1	Spindle assembly checkpoint component MAD3	MAD3	>sp|P47074|MAD3_YEAST Spindle assembly checkpoint component MAD3 OS=Saccharomyces cerevisiae (strain ATCC 204508 / S288c) GN=MAD3 PE=1 SV=1	1	1	1	1	1	2.7	2.7
458	P47075	5	5	Vacuolar transporter chaperone 4	VTC4	>sp|P47075|VTC4_YEAST Vacuolar transporter chaperone 4 OS=Saccharomyces cerevisiae (strain ATCC 204508 / S288c) GN=VTC4 PE=1 SV=2	1	5	5	0	5	0	8.2
459	P47085	2	2	MEMO1 family protein YJR008W		>sp|P47085|YJX8_YEAST MEMO1 family protein YJR008W OS=Saccharomyces cerevisiae (strain ATCC 204508 / S288c) GN=YJR008W PE=1 SV=1	1	2	2	2	1	7.1	4.1
460	P47110	1	1	DNA polymerase delta subunit 3	POL32	>sp|P47110|DPOD3_YEAST DNA polymerase delta subunit 3 OS=Saccharomyces cerevisiae (strain ATCC 204508 / S288c) GN=POL32 PE=1 SV=1	1	1	1	1	0	3.4	0
461	P47116	34	33	Serine/threonine-protein kinase PTK2/STK2	PTK2	>sp|P47116|PTK2_YEAST Serine/threonine-protein kinase PTK2/STK2 OS=Saccharomyces cerevisiae (strain ATCC 204508 / S288c) GN=PTK2 PE=1 SV=1	1	34	33	34	11	54.5	17.8
462	P47129	2	2	Assembly-complementing factor 4	ACF4	>sp|P47129|ACF4_YEAST Assembly-complementing factor 4 OS=Saccharomyces cerevisiae (strain ATCC 204508 / S288c) GN=ACF4 PE=1 SV=1	1	2	2	1	1	3.9	1.9
463	P47134	2	2	Protein BIR1	BIR1	>sp|P47134|BIR1_YEAST Protein BIR1 OS=Saccharomyces cerevisiae (strain ATCC 204508 / S288c) GN=BIR1 PE=1 SV=1	1	2	2	2	0	3.5	0
464	P47157	1	1	Putative uncharacterized protein YJR120W		>sp|P47157|YJ90_YEAST Putative uncharacterized protein YJR120W OS=Saccharomyces cerevisiae (strain ATCC 204508 / S288c) GN=YJR120W PE=2 SV=1	1	1	1	0	1	0	7.8
465	P47175	1	1	Probable transcription factor HMS2	HMS2	>sp|P47175|HMS2_YEAST Probable transcription factor HMS2 OS=Saccharomyces cerevisiae (strain ATCC 204508 / S288c) GN=HMS2 PE=1 SV=1	1	1	1	0	1	0	4.2
466	P48016	1	1	Vacuolar acid trehalase	ATH1	>sp|P48016|ATH1_YEAST Vacuolar acid trehalase OS=Saccharomyces cerevisiae (strain ATCC 204508 / S288c) GN=ATH1 PE=1 SV=1	1	1	1	1	0	2.1	0
467	P48524	15	15	Ubiquitin ligase-binding protein BUL1	BUL1	>sp|P48524|BUL1_YEAST Ubiquitin ligase-binding protein BUL1 OS=Saccharomyces cerevisiae (strain ATCC 204508 / S288c) GN=BUL1 PE=1 SV=1	1	15	15	15	3	19.6	3
468	P48565	1	1	pH-response regulator protein palH/RIM21	RIM21	>sp|P48565|PALH_YEAST pH-response regulator protein palH/RIM21 OS=Saccharomyces cerevisiae (strain ATCC 204508 / S288c) GN=RIM21 PE=1 SV=1	1	1	1	1	0	3.4	0
469	P48570;Q12122	9;8	9;8	Homocitrate synthase, cytosolic isozyme;Homocitrate synthase, mitochondrial	LYS20;LYS21	>sp|P48570|HOSC_YEAST Homocitrate synthase, cytosolic isozyme OS=Saccharomyces cerevisiae (strain ATCC 204508 / S288c) GN=LYS20 PE=1 SV=1;>sp|Q12122|HOSM_YEAST Homocitrate synthase, mitochondrial OS=Saccharomyces cerevisiae (strain ATCC 204508 / S288c) GN=	2	9	9	0	9	0	20.8
470	P49089	37	27	Asparagine synthetase [glutamine-hydrolyzing] 1	ASN1	>sp|P49089|ASNS1_YEAST Asparagine synthetase [glutamine-hydrolyzing] 1 OS=Saccharomyces cerevisiae (strain ATCC 204508 / S288c) GN=ASN1 PE=1 SV=2	1	37	27	35	30	55.4	57
471	P49090	47	37	Asparagine synthetase [glutamine-hydrolyzing] 2	ASN2	>sp|P49090|ASNS2_YEAST Asparagine synthetase [glutamine-hydrolyzing] 2 OS=Saccharomyces cerevisiae (strain ATCC 204508 / S288c) GN=ASN2 PE=1 SV=2	1	47	37	46	44	71.7	73.1
472	P49095	41	41	Glycine dehydrogenase [decarboxylating], mitochondrial	GCV2	>sp|P49095|GCSP_YEAST Glycine dehydrogenase [decarboxylating], mitochondrial OS=Saccharomyces cerevisiae (strain ATCC 204508 / S288c) GN=GCV2 PE=1 SV=1	1	41	41	41	29	50.8	37
473	P50087	1	1	Mitochondrial organizing structure protein 2	MOS2	>sp|P50087|MOS2_YEAST Mitochondrial organizing structure protein 2 OS=Saccharomyces cerevisiae (strain ATCC 204508 / S288c) GN=MOS2 PE=1 SV=1	1	1	1	1	0	6	0
474	P50089	48	48	Uncharacterized protein YGR237C		>sp|P50089|YG51_YEAST Uncharacterized protein YGR237C OS=Saccharomyces cerevisiae (strain ATCC 204508 / S288c) GN=YGR237C PE=1 SV=1	1	48	48	47	45	53.8	53.8
475	P50090	1	1	Kelch repeat-containing protein 2	KEL2	>sp|P50090|KEL2_YEAST Kelch repeat-containing protein 2 OS=Saccharomyces cerevisiae (strain ATCC 204508 / S288c) GN=KEL2 PE=1 SV=1	1	1	1	1	0	2.3	0
476	P50102	10	10	Ubiquitin carboxyl-terminal hydrolase 8	UBP8	>sp|P50102|UBP8_YEAST Ubiquitin carboxyl-terminal hydrolase 8 OS=Saccharomyces cerevisiae (strain ATCC 204508 / S288c) GN=UBP8 PE=1 SV=1	1	10	10	10	1	25.1	1.9
477	P50109	34	34	Protein PSP2	PSP2	>sp|P50109|PSP2_YEAST Protein PSP2 OS=Saccharomyces cerevisiae (strain ATCC 204508 / S288c) GN=PSP2 PE=1 SV=2	1	34	34	34	28	54.3	46.9
478	P50110	1	1	Sorting assembly machinery 37 kDa subunit	SAM37	>sp|P50110|SAM37_YEAST Sorting assembly machinery 37 kDa subunit OS=Saccharomyces cerevisiae (strain ATCC 204508 / S288c) GN=SAM37 PE=1 SV=1	1	1	1	1	0	4.6	0
479	P50111	14	14	Protein ZDS1	ZDS1	>sp|P50111|ZDS1_YEAST Protein ZDS1 OS=Saccharomyces cerevisiae (strain ATCC 204508 / S288c) GN=ZDS1 PE=1 SV=1	1	14	14	14	0	20.4	0
480	P50623	3	3	SUMO-conjugating enzyme UBC9	UBC9	>sp|P50623|UBC9_YEAST SUMO-conjugating enzyme UBC9 OS=Saccharomyces cerevisiae (strain ATCC 204508 / S288c) GN=UBC9 PE=1 SV=1	1	3	3	3	0	29.3	0
481	P50942	1	1	Polyphosphatidylinositol phosphatase INP52;SAC1-like phosphoinositide phosphatase;Phosphatidylinositol 4,5-bisphosphate 5-phosphatase	INP52	>sp|P50942|INP52_YEAST Polyphosphatidylinositol phosphatase INP52 OS=Saccharomyces cerevisiae (strain ATCC 204508 / S288c) GN=INP52 PE=1 SV=1	1	1	1	1	0	1.8	0
482	P51534	1	1	SWI5-dependent HO expression protein 4	SHE4	>sp|P51534|SHE4_YEAST SWI5-dependent HO expression protein 4 OS=Saccharomyces cerevisiae (strain ATCC 204508 / S288c) GN=SHE4 PE=1 SV=2	1	1	1	1	0	2.4	0
483	P51862	100	99	RHO1 GDP-GTP exchange protein 2	ROM2	>sp|P51862|ROM2_YEAST RHO1 GDP-GTP exchange protein 2 OS=Saccharomyces cerevisiae (strain ATCC 204508 / S288c) GN=ROM2 PE=1 SV=1	1	100	99	69	99	54.8	65.9
484	P52488	4	4	Ubiquitin-activating enzyme E1-like	UBA2	>sp|P52488|UBA2_YEAST Ubiquitin-activating enzyme E1-like OS=Saccharomyces cerevisiae (strain ATCC 204508 / S288c) GN=UBA2 PE=1 SV=1	1	4	4	4	0	8	0
485	P52871	1	1	Protein transport protein SEB2	SEB2	>sp|P52871|SC6B2_YEAST Protein transport protein SEB2 OS=Saccharomyces cerevisiae (strain ATCC 204508 / S288c) GN=SEB2 PE=1 SV=1	1	1	1	1	1	14.8	14.8
486	P52910	18	17	Acetyl-coenzyme A synthetase 2	ACS2	>sp|P52910|ACS2_YEAST Acetyl-coenzyme A synthetase 2 OS=Saccharomyces cerevisiae (strain ATCC 204508 / S288c) GN=ACS2 PE=1 SV=1	1	18	17	16	10	22.1	14.2
487	P53010	1	1	PAB-dependent poly(A)-specific ribonuclease subunit PAN2	PAN2	>sp|P53010|PAN2_YEAST PAB-dependent poly(A)-specific ribonuclease subunit PAN2 OS=Saccharomyces cerevisiae (strain ATCC 204508 / S288c) GN=PAN2 PE=1 SV=1	1	1	1	0	1	0	1.1
488	P53045	5	5	Methylsterol monooxygenase	ERG25	>sp|P53045|MSMO_YEAST Methylsterol monooxygenase OS=Saccharomyces cerevisiae (strain ATCC 204508 / S288c) GN=ERG25 PE=1 SV=1	1	5	5	4	4	16.2	13.3
489	P53046	3	2	RHO1 GDP-GTP exchange protein 1	ROM1	>sp|P53046|ROM1_YEAST RHO1 GDP-GTP exchange protein 1 OS=Saccharomyces cerevisiae (strain ATCC 204508 / S288c) GN=ROM1 PE=1 SV=2	1	3	2	2	3	2.2	2.7
490	P53094	1	1	Negative regulator of sporulation MDS3	MDS3	>sp|P53094|MDS3_YEAST Negative regulator of sporulation MDS3 OS=Saccharomyces cerevisiae (strain ATCC 204508 / S288c) GN=MDS3 PE=1 SV=2	1	1	1	1	1	0.8	0.8
491	P53096	6	6	Probable histone deacetylase HOS2	HOS2	>sp|P53096|HOS2_YEAST Probable histone deacetylase HOS2 OS=Saccharomyces cerevisiae (strain ATCC 204508 / S288c) GN=HOS2 PE=1 SV=1	1	6	6	6	2	17	3.8
492	P53114	2	2	Mediator of RNA polymerase II transcription subunit 5	NUT1	>sp|P53114|MED5_YEAST Mediator of RNA polymerase II transcription subunit 5 OS=Saccharomyces cerevisiae (strain ATCC 204508 / S288c) GN=NUT1 PE=1 SV=1	1	2	2	1	1	1.3	1.6
493	P53115	1	1	Putative DNA helicase INO80	INO80	>sp|P53115|INO80_YEAST Putative DNA helicase INO80 OS=Saccharomyces cerevisiae (strain ATCC 204508 / S288c) GN=INO80 PE=1 SV=1	1	1	1	1	0	0.6	0
494	P53131	10	10	Pre-mRNA-splicing factor ATP-dependent RNA helicase PRP43	PRP43	>sp|P53131|PRP43_YEAST Pre-mRNA-splicing factor ATP-dependent RNA helicase PRP43 OS=Saccharomyces cerevisiae (strain ATCC 204508 / S288c) GN=PRP43 PE=1 SV=1	1	10	10	0	10	0	16
495	P53136	1	1	Ribosome biogenesis protein NSA1	NSA1	>sp|P53136|NSA1_YEAST Ribosome biogenesis protein NSA1 OS=Saccharomyces cerevisiae (strain ATCC 204508 / S288c) GN=NSA1 PE=1 SV=1	1	1	1	1	0	5.8	0
496	P53154	1	1	Glycerol uptake protein 1	GUP1	>sp|P53154|GUP1_YEAST Glycerol uptake protein 1 OS=Saccharomyces cerevisiae (strain ATCC 204508 / S288c) GN=GUP1 PE=1 SV=1	1	1	1	0	1	0	1.8
497	P53166	1	1	ATP-dependent RNA helicase MRH4, mitochondrial	MRH4	>sp|P53166|MRH4_YEAST ATP-dependent RNA helicase MRH4, mitochondrial OS=Saccharomyces cerevisiae (strain ATCC 204508 / S288c) GN=MRH4 PE=1 SV=1	1	1	1	1	0	2.3	0
498	P53172	1	1	Protein SDS23	SDS23	>sp|P53172|SDS23_YEAST Protein SDS23 OS=Saccharomyces cerevisiae (strain ATCC 204508 / S288c) GN=SDS23 PE=1 SV=2	1	1	1	1	0	2.3	0
499	P53184	11	11	Nicotinamidase	PNC1	>sp|P53184|PNC1_YEAST Nicotinamidase OS=Saccharomyces cerevisiae (strain ATCC 204508 / S288c) GN=PNC1 PE=1 SV=1	1	11	11	11	5	81.5	38.9
500	P53185	1	1	Uncharacterized protein YGL036W	YGL036W	>sp|P53185|YG036_YEAST Uncharacterized protein YGL036W OS=Saccharomyces cerevisiae (strain ATCC 204508 / S288c) GN=YGL036W PE=1 SV=1	1	1	1	0	1	0	0.9
501	P53220	2	2	Mitochondrial import inner membrane translocase subunit TIM21	TIM21	>sp|P53220|TIM21_YEAST Mitochondrial import inner membrane translocase subunit TIM21 OS=Saccharomyces cerevisiae (strain ATCC 204508 / S288c) GN=TIM21 PE=1 SV=1	1	2	2	0	2	0	8.8
502	P53236	4	3	Chromatin structure-remodeling complex subunit RSC1	RSC1	>sp|P53236|RSC1_YEAST Chromatin structure-remodeling complex subunit RSC1 OS=Saccharomyces cerevisiae (strain ATCC 204508 / S288c) GN=RSC1 PE=1 SV=1	1	4	3	4	0	6.1	0
503	P53240	1	1	Putative uncharacterized protein YGR064W	YGR064W	>sp|P53240|YG27_YEAST Putative uncharacterized protein YGR064W OS=Saccharomyces cerevisiae (strain ATCC 204508 / S288c) GN=YGR064W PE=5 SV=1	1	1	1	1	0	9	0
504	P53252	1	1	Sphingolipid long chain base-responsive protein PIL1	PIL1	>sp|P53252|PIL1_YEAST Sphingolipid long chain base-responsive protein PIL1 OS=Saccharomyces cerevisiae (strain ATCC 204508 / S288c) GN=PIL1 PE=1 SV=1	1	1	1	1	0	4.7	0
505	P53293	1	1	Uncharacterized protein YGR168C	YGR168C	>sp|P53293|YG3W_YEAST Uncharacterized protein YGR168C OS=Saccharomyces cerevisiae (strain ATCC 204508 / S288c) GN=YGR168C PE=2 SV=1	1	1	1	0	1	0	4.5
506	P53297	50	50	PAB1-binding protein 1	PBP1	>sp|P53297|PBP1_YEAST PAB1-binding protein 1 OS=Saccharomyces cerevisiae (strain ATCC 204508 / S288c) GN=PBP1 PE=1 SV=1	1	50	50	42	50	54.8	61.1
507	P53325	2	2	Putative uncharacterized protein YGR265W	YGR265W	>sp|P53325|YG5K_YEAST Putative uncharacterized protein YGR265W OS=Saccharomyces cerevisiae (strain ATCC 204508 / S288c) GN=YGR265W PE=5 SV=1	1	2	2	2	1	15.4	5.1
508	P53326	47	47	Uncharacterized protein YGR266W	YGR266W	>sp|P53326|YG5L_YEAST Uncharacterized protein YGR266W OS=Saccharomyces cerevisiae (strain ATCC 204508 / S288c) GN=YGR266W PE=1 SV=1	1	47	47	46	30	60.9	43.1
509	P53332	13	13	Phosphopantetheine adenylyltransferase	CAB4	>sp|P53332|COAD_YEAST Phosphopantetheine adenylyltransferase OS=Saccharomyces cerevisiae (strain ATCC 204508 / S288c) GN=CAB4 PE=1 SV=1	1	13	13	13	9	54.4	36.1
510	P53538	1	1	RNA polymerase II subunit A C-terminal domain phosphatase SSU72	SSU72	>sp|P53538|SSU72_YEAST RNA polymerase II subunit A C-terminal domain phosphatase SSU72 OS=Saccharomyces cerevisiae (strain ATCC 204508 / S288c) GN=SSU72 PE=1 SV=1	1	1	1	1	0	5.8	0
511	P53540	1	1	Spindle pole body component SPC98	SPC98	>sp|P53540|SPC98_YEAST Spindle pole body component SPC98 OS=Saccharomyces cerevisiae (strain ATCC 204508 / S288c) GN=SPC98 PE=1 SV=1	1	1	1	0	1	0	1.8
512	P53599	2	2	MAP kinase kinase kinase SSK2	SSK2	>sp|P53599|SSK2_YEAST MAP kinase kinase kinase SSK2 OS=Saccharomyces cerevisiae (strain ATCC 204508 / S288c) GN=SSK2 PE=1 SV=1	1	2	2	1	1	0.6	1
513	P53622	66	66	Coatomer subunit alpha	COP1	>sp|P53622|COPA_YEAST Coatomer subunit alpha OS=Saccharomyces cerevisiae (strain ATCC 204508 / S288c) GN=COP1 PE=1 SV=2	1	66	66	66	56	63.4	56.5
514	P53633	2	2	Prenylated Rab acceptor 1	YIP3	>sp|P53633|PRA1_YEAST Prenylated Rab acceptor 1 OS=Saccharomyces cerevisiae (strain ATCC 204508 / S288c) GN=YIP3 PE=1 SV=2	1	2	2	0	2	0	10.8
515	P53721	2	2	Altered inheritance rate of mitochondria protein 38	AIM38	>sp|P53721|AIM38_YEAST Altered inheritance rate of mitochondria protein 38 OS=Saccharomyces cerevisiae (strain ATCC 204508 / S288c) GN=AIM38 PE=1 SV=1	1	2	2	0	2	0	8.9
516	P53723	3	3	UPF0674 endoplasmic reticulum membrane protein YNR021W		>sp|P53723|YN8B_YEAST UPF0674 endoplasmic reticulum membrane protein YNR021W OS=Saccharomyces cerevisiae (strain ATCC 204508 / S288c) GN=YNR021W PE=1 SV=3	1	3	3	1	3	2	9.2
517	P53731	10	10	Actin-related protein 2/3 complex subunit 2	ARC35	>sp|P53731|ARPC2_YEAST Actin-related protein 2/3 complex subunit 2 OS=Saccharomyces cerevisiae (strain ATCC 204508 / S288c) GN=ARC35 PE=1 SV=1	1	10	10	7	9	25.1	29.8
518	P53739	30	28	Flippase kinase 1	FPK1	>sp|P53739|FPK1_YEAST Flippase kinase 1 OS=Saccharomyces cerevisiae (strain ATCC 204508 / S288c) GN=FPK1 PE=1 SV=1	1	30	28	22	30	33	43.3
519	P53858	2	2	Protein BNI4	BNI4	>sp|P53858|BNI4_YEAST Protein BNI4 OS=Saccharomyces cerevisiae (strain ATCC 204508 / S288c) GN=BNI4 PE=1 SV=1	1	2	2	1	1	0.8	1.8
520	P53870	4	3	Uncharacterized protein YNL193W		>sp|P53870|YNT3_YEAST Uncharacterized protein YNL193W OS=Saccharomyces cerevisiae (strain ATCC 204508 / S288c) GN=YNL193W PE=2 SV=2	1	4	3	1	3	1.1	6.1
521	P53892	6	6	Protein IBD2	IBD2	>sp|P53892|IBD2_YEAST Protein IBD2 OS=Saccharomyces cerevisiae (strain ATCC 204508 / S288c) GN=IBD2 PE=1 SV=1	1	6	6	6	3	28.2	13.4
522	P53914	2	2	UPF0202 protein KRE33	KRE33	>sp|P53914|KRE33_YEAST UPF0202 protein KRE33 OS=Saccharomyces cerevisiae (strain ATCC 204508 / S288c) GN=KRE33 PE=1 SV=1	1	2	2	0	2	0	1.8
523	P53935	56	56	Stress response protein NST1	NST1	>sp|P53935|NST1_YEAST Stress response protein NST1 OS=Saccharomyces cerevisiae (strain ATCC 204508 / S288c) GN=NST1 PE=1 SV=1	1	56	56	37	56	36.5	49.4
524	P53941	3	3	U3 small nucleolar ribonucleoprotein protein IMP4	IMP4	>sp|P53941|IMP4_YEAST U3 small nucleolar ribonucleoprotein protein IMP4 OS=Saccharomyces cerevisiae (strain ATCC 204508 / S288c) GN=IMP4 PE=1 SV=1	1	3	3	2	3	7.6	10.3
525	P53958	1	1	Protein BOP3	BOP3	>sp|P53958|BOP3_YEAST Protein BOP3 OS=Saccharomyces cerevisiae (strain ATCC 204508 / S288c) GN=BOP3 PE=1 SV=1	1	1	1	1	0	5.3	0
526	P53978	13	1	Elongation factor 3B	HEF3	>sp|P53978|EF3B_YEAST Elongation factor 3B OS=Saccharomyces cerevisiae (strain ATCC 204508 / S288c) GN=HEF3 PE=1 SV=2	1	13	1	3	13	3.4	13.3
527	P53980	1	1	Uncharacterized protein YNL011C		>sp|P53980|YNB1_YEAST Uncharacterized protein YNL011C OS=Saccharomyces cerevisiae (strain ATCC 204508 / S288c) GN=YNL011C PE=1 SV=1	1	1	1	1	0	2.9	0
528	P54780	10	2	60S ribosomal protein L15-B	RPL15B	>sp|P54780|RL15B_YEAST 60S ribosomal protein L15-B OS=Saccharomyces cerevisiae (strain ATCC 204508 / S288c) GN=RPL15B PE=1 SV=2	1	10	2	10	8	41.2	36.8
529	P54784	1	1	Origin recognition complex subunit 1	ORC1	>sp|P54784|ORC1_YEAST Origin recognition complex subunit 1 OS=Saccharomyces cerevisiae (strain ATCC 204508 / S288c) GN=ORC1 PE=1 SV=1	1	1	1	1	0	1.9	0
530	P54785	8	8	Transcriptional activator/repressor MOT3	MOT3	>sp|P54785|MOT3_YEAST Transcriptional activator/repressor MOT3 OS=Saccharomyces cerevisiae (strain ATCC 204508 / S288c) GN=MOT3 PE=1 SV=1	1	8	8	6	8	13.3	13.3
531	P54837	2	2	Endoplasmic reticulum vesicle protein 25	ERV25	>sp|P54837|TMEDA_YEAST Endoplasmic reticulum vesicle protein 25 OS=Saccharomyces cerevisiae (strain ATCC 204508 / S288c) GN=ERV25 PE=1 SV=1	1	2	2	0	2	0	7.1
532	P54839	1	1	Hydroxymethylglutaryl-CoA synthase	ERG13	>sp|P54839|HMCS_YEAST Hydroxymethylglutaryl-CoA synthase OS=Saccharomyces cerevisiae (strain ATCC 204508 / S288c) GN=ERG13 PE=1 SV=1	1	1	1	0	1	0	2.2
533	P54861	1	1	Dynamin-related protein DNM1	DNM1	>sp|P54861|DNM1_YEAST Dynamin-related protein DNM1 OS=Saccharomyces cerevisiae (strain ATCC 204508 / S288c) GN=DNM1 PE=1 SV=1	1	1	1	0	1	0	2.1
534	P54964	1	1	Oligoribonuclease, mitochondrial	REX2	>sp|P54964|ORN_YEAST Oligoribonuclease, mitochondrial OS=Saccharomyces cerevisiae (strain ATCC 204508 / S288c) GN=REX2 PE=1 SV=1	1	1	1	1	0	6.3	0
535	P56508	1	1	Protein SNA2	SNA2	>sp|P56508|SNA2_YEAST Protein SNA2 OS=Saccharomyces cerevisiae (strain ATCC 204508 / S288c) GN=SNA2 PE=1 SV=1	1	1	1	1	1	19	19
536	P60010	15	7	Actin	ACT1	>sp|P60010|ACT_YEAST Actin OS=Saccharomyces cerevisiae (strain ATCC 204508 / S288c) GN=ACT1 PE=1 SV=1	1	15	7	10	14	29.9	42.7
537	P61830	1	1	Histone H3	HHT1	>sp|P61830|H3_YEAST Histone H3 OS=Saccharomyces cerevisiae (strain ATCC 204508 / S288c) GN=HHT1 PE=1 SV=2	1	1	1	1	0	6.6	0
538	Q00055	4	2	Glycerol-3-phosphate dehydrogenase [NAD(+)] 1	GPD1	>sp|Q00055|GPD1_YEAST Glycerol-3-phosphate dehydrogenase [NAD(+)] 1 OS=Saccharomyces cerevisiae (strain ATCC 204508 / S288c) GN=GPD1 PE=1 SV=4	1	4	2	3	3	9.2	7.4
539	Q00402	146	146	Nuclear migration protein NUM1	NUM1	>sp|Q00402|NUM1_YEAST Nuclear migration protein NUM1 OS=Saccharomyces cerevisiae (strain ATCC 204508 / S288c) GN=NUM1 PE=1 SV=2	1	146	146	137	124	67.6	66.3
540	Q00416	3	3	Helicase SEN1	SEN1	>sp|Q00416|SEN1_YEAST Helicase SEN1 OS=Saccharomyces cerevisiae (strain ATCC 204508 / S288c) GN=SEN1 PE=1 SV=2	1	3	3	2	1	1.2	0.3
541	Q00711	33	26	Succinate dehydrogenase [ubiquinone] flavoprotein subunit, mitochondrial	SDH1	>sp|Q00711|DHSA_YEAST Succinate dehydrogenase [ubiquinone] flavoprotein subunit, mitochondrial OS=Saccharomyces cerevisiae (strain ATCC 204508 / S288c) GN=SDH1 PE=1 SV=1	1	33	26	33	26	61.1	43.3
542	Q00764	12	12	Alpha,alpha-trehalose-phosphate synthase [UDP-forming] 56 kDa subunit	TPS1	>sp|Q00764|TPS1_YEAST Alpha,alpha-trehalose-phosphate synthase [UDP-forming] 56 kDa subunit OS=Saccharomyces cerevisiae (strain ATCC 204508 / S288c) GN=TPS1 PE=1 SV=2	1	12	12	12	7	30.9	16.4
543	Q00772	1	1	Mitogen-activated protein kinase SLT2/MPK1	SLT2	>sp|Q00772|SLT2_YEAST Mitogen-activated protein kinase SLT2/MPK1 OS=Saccharomyces cerevisiae (strain ATCC 204508 / S288c) GN=SLT2 PE=1 SV=2	1	1	1	0	1	0	4.1
544	Q00947	2	2	Transcription factor STP1	STP1	>sp|Q00947|STP1_YEAST Transcription factor STP1 OS=Saccharomyces cerevisiae (strain ATCC 204508 / S288c) GN=STP1 PE=1 SV=3	1	2	2	2	0	5.4	0
545	Q01389	2	2	Serine/threonine-protein kinase BCK1/SLK1/SSP31	BCK1	>sp|Q01389|BCK1_YEAST Serine/threonine-protein kinase BCK1/SLK1/SSP31 OS=Saccharomyces cerevisiae (strain ATCC 204508 / S288c) GN=BCK1 PE=1 SV=1	1	2	2	1	1	0.8	1.1
546	Q01448	6	6	Histone promoter control protein 2	HPC2	>sp|Q01448|HPC2_YEAST Histone promoter control protein 2 OS=Saccharomyces cerevisiae (strain ATCC 204508 / S288c) GN=HPC2 PE=1 SV=2	1	6	6	5	2	11.7	5.3
547	Q01477	57	57	Ubiquitin carboxyl-terminal hydrolase 3	UBP3	>sp|Q01477|UBP3_YEAST Ubiquitin carboxyl-terminal hydrolase 3 OS=Saccharomyces cerevisiae (strain ATCC 204508 / S288c) GN=UBP3 PE=1 SV=1	1	57	57	54	47	61.4	54.7
548	Q01560	15	15	Nucleolar protein 3	NPL3	>sp|Q01560|NOP3_YEAST Nucleolar protein 3 OS=Saccharomyces cerevisiae (strain ATCC 204508 / S288c) GN=NPL3 PE=1 SV=1	1	15	15	14	7	30.4	20.3
549	Q01574	15	14	Acetyl-coenzyme A synthetase 1	ACS1	>sp|Q01574|ACS1_YEAST Acetyl-coenzyme A synthetase 1 OS=Saccharomyces cerevisiae (strain ATCC 204508 / S288c) GN=ACS1 PE=1 SV=2	1	15	14	12	10	21.5	17.7
550	Q01662	2	2	Methionine aminopeptidase 1	MAP1	>sp|Q01662|AMPM1_YEAST Methionine aminopeptidase 1 OS=Saccharomyces cerevisiae (strain ATCC 204508 / S288c) GN=MAP1 PE=1 SV=2	1	2	2	1	1	4.7	3.1
551	Q02100	1	1	CRE-binding bZIP protein SKO1	SKO1	>sp|Q02100|SKO1_YEAST CRE-binding bZIP protein SKO1 OS=Saccharomyces cerevisiae (strain ATCC 204508 / S288c) GN=SKO1 PE=1 SV=1	1	1	1	1	0	2.8	0
552	Q02206	2	2	Chromatin structure-remodeling complex subunit RSC4	RSC4	>sp|Q02206|RSC4_YEAST Chromatin structure-remodeling complex subunit RSC4 OS=Saccharomyces cerevisiae (strain ATCC 204508 / S288c) GN=RSC4 PE=1 SV=2	1	2	2	1	1	2.1	1.8
553	Q02208	3	3	Topoisomerase 1-associated factor 2	TOF2	>sp|Q02208|TOF2_YEAST Topoisomerase 1-associated factor 2 OS=Saccharomyces cerevisiae (strain ATCC 204508 / S288c) GN=TOF2 PE=1 SV=1	1	3	3	3	0	6	0
554	Q02648	2	2	tRNA (uracil-O(2)-)-methyltransferase	TRM44	>sp|Q02648|TRM44_YEAST tRNA (uracil-O(2)-)-methyltransferase OS=Saccharomyces cerevisiae (strain ATCC 204508 / S288c) GN=TRM44 PE=1 SV=1	1	2	2	1	1	1.9	2.8
555	Q02724	1	1	Ubiquitin-like-specific protease 1	ULP1	>sp|Q02724|ULP1_YEAST Ubiquitin-like-specific protease 1 OS=Saccharomyces cerevisiae (strain ATCC 204508 / S288c) GN=ULP1 PE=1 SV=1	1	1	1	1	0	2.1	0
556	Q02753	8	1	60S ribosomal protein L21-A	RPL21A	>sp|Q02753|RL21A_YEAST 60S ribosomal protein L21-A OS=Saccharomyces cerevisiae (strain ATCC 204508 / S288c) GN=RPL21A PE=1 SV=1	1	8	1	8	5	48.1	36.9
557	Q02773	1	1	Ribonuclease P protein component, mitochondrial	RPM2	>sp|Q02773|RPM2_YEAST Ribonuclease P protein component, mitochondrial OS=Saccharomyces cerevisiae (strain ATCC 204508 / S288c) GN=RPM2 PE=1 SV=1	1	1	1	0	1	0	0.9
558	Q02875	1	1	SMY2 homolog 2	SYH1	>sp|Q02875|SYH1_YEAST SMY2 homolog 2 OS=Saccharomyces cerevisiae (strain ATCC 204508 / S288c) GN=SYH1 PE=1 SV=1	1	1	1	0	1	0	1.1
559	Q02883	2	2	N-acyl-phosphatidylethanolamine-hydrolyzing phospholipase D, mitochondrial	FMP30	>sp|Q02883|FMP30_YEAST N-acyl-phosphatidylethanolamine-hydrolyzing phospholipase D, mitochondrial OS=Saccharomyces cerevisiae (strain ATCC 204508 / S288c) GN=FMP30 PE=1 SV=1	1	2	2	1	1	2.4	3
560	Q02884	3	3	Elongator complex protein 4	ELP4	>sp|Q02884|ELP4_YEAST Elongator complex protein 4 OS=Saccharomyces cerevisiae (strain ATCC 204508 / S288c) GN=ELP4 PE=1 SV=1	1	3	3	0	3	0	8.8
561	Q02888	1	1	Altered inheritance of mitochondria protein 43, mitochondrial	AIM43	>sp|Q02888|AIM43_YEAST Altered inheritance of mitochondria protein 43, mitochondrial OS=Saccharomyces cerevisiae (strain ATCC 204508 / S288c) GN=AIM43 PE=1 SV=1	1	1	1	0	1	0	9.3
562	Q02895	1	1	Putative aryl-alcohol dehydrogenase YPL088W	YPL088W	>sp|Q02895|YP088_YEAST Putative aryl-alcohol dehydrogenase YPL088W OS=Saccharomyces cerevisiae (strain ATCC 204508 / S288c) GN=YPL088W PE=1 SV=1	1	1	1	0	1	0	5.8
563	Q02959	34	34	Histone deacetylase HOS3	HOS3	>sp|Q02959|HOS3_YEAST Histone deacetylase HOS3 OS=Saccharomyces cerevisiae (strain ATCC 204508 / S288c) GN=HOS3 PE=1 SV=1	1	34	34	33	30	54.2	49.8
564	Q02979	6	6	Glycerophosphodiester phosphodiesterase GDE1	GDE1	>sp|Q02979|GDE1_YEAST Glycerophosphodiester phosphodiesterase GDE1 OS=Saccharomyces cerevisiae (strain ATCC 204508 / S288c) GN=GDE1 PE=1 SV=1	1	6	6	5	1	5.7	0.6
565	Q03012	1	1	COMPASS component SPP1	SPP1	>sp|Q03012|SPP1_YEAST COMPASS component SPP1 OS=Saccharomyces cerevisiae (strain ATCC 204508 / S288c) GN=SPP1 PE=1 SV=1	1	1	1	1	0	3.7	0
566	Q03102	4	4	Uncharacterized membrane protein YML131W		>sp|Q03102|YMN1_YEAST Uncharacterized membrane protein YML131W OS=Saccharomyces cerevisiae (strain ATCC 204508 / S288c) GN=YML131W PE=1 SV=1	1	4	4	0	4	0	14.2
567	Q03161	1	1	Glucose-6-phosphate 1-epimerase		>sp|Q03161|YMY9_YEAST Glucose-6-phosphate 1-epimerase OS=Saccharomyces cerevisiae (strain ATCC 204508 / S288c) GN=YMR099C PE=1 SV=1	1	1	1	0	1	0	4
568	Q03177	40	40	WD repeat-containing protein YMR102C		>sp|Q03177|YMZ2_YEAST WD repeat-containing protein YMR102C OS=Saccharomyces cerevisiae (strain ATCC 204508 / S288c) GN=YMR102C PE=1 SV=1	1	40	40	38	33	48.9	48.7
569	Q03180	1	1	Cell wall mannoprotein PIR3	PIR3	>sp|Q03180|PIR3_YEAST Cell wall mannoprotein PIR3 OS=Saccharomyces cerevisiae (strain ATCC 204508 / S288c) GN=PIR3 PE=1 SV=3	1	1	1	0	1	0	22.5
570	Q03218	19	19	Mitochondrial metal transporter 1	MMT1	>sp|Q03218|MMT1_YEAST Mitochondrial metal transporter 1 OS=Saccharomyces cerevisiae (strain ATCC 204508 / S288c) GN=MMT1 PE=1 SV=1	1	19	19	12	19	25.3	35.7
571	Q03262	23	23	Phosphoglucomutase-3	PGM3	>sp|Q03262|PGM3_YEAST Phosphoglucomutase-3 OS=Saccharomyces cerevisiae (strain ATCC 204508 / S288c) GN=PGM3 PE=1 SV=1	1	23	23	22	16	37.3	30.7
572	Q03280	3	3	E3 ubiquitin-protein ligase TOM1	TOM1	>sp|Q03280|TOM1_YEAST E3 ubiquitin-protein ligase TOM1 OS=Saccharomyces cerevisiae (strain ATCC 204508 / S288c) GN=TOM1 PE=1 SV=1	1	3	3	2	1	0.7	0.2
573	Q03281	1	1	Inner nuclear membrane protein HEH2	HEH2	>sp|Q03281|HEH2_YEAST Inner nuclear membrane protein HEH2 OS=Saccharomyces cerevisiae (strain ATCC 204508 / S288c) GN=HEH2 PE=1 SV=1	1	1	1	1	0	2.6	0
574	Q03323	1	1	COMPASS component SDC1	SDC1	>sp|Q03323|SDC1_YEAST COMPASS component SDC1 OS=Saccharomyces cerevisiae (strain ATCC 204508 / S288c) GN=SDC1 PE=1 SV=1	1	1	1	0	1	0	6.3
575	Q03330	7	7	Histone acetyltransferase GCN5	GCN5	>sp|Q03330|GCN5_YEAST Histone acetyltransferase GCN5 OS=Saccharomyces cerevisiae (strain ATCC 204508 / S288c) GN=GCN5 PE=1 SV=1	1	7	7	7	0	21.4	0
576	Q03361	49	49	Uncharacterized protein JIP4	JIP4	>sp|Q03361|JIP4_YEAST Uncharacterized protein JIP4 OS=Saccharomyces cerevisiae (strain ATCC 204508 / S288c) GN=JIP4 PE=1 SV=2	1	49	49	43	47	51.7	52.4
577	Q03375	1	1	Pre-mRNA-splicing factor CWC21	CWC21	>sp|Q03375|CWC21_YEAST Pre-mRNA-splicing factor CWC21 OS=Saccharomyces cerevisiae (strain ATCC 204508 / S288c) GN=CWC21 PE=1 SV=1	1	1	1	1	0	6.7	0
578	Q03388	14	14	Vacuolar protein sorting-associated protein 72	VPS72	>sp|Q03388|VPS72_YEAST Vacuolar protein sorting-associated protein 72 OS=Saccharomyces cerevisiae (strain ATCC 204508 / S288c) GN=VPS72 PE=1 SV=2	1	14	14	14	0	24	0
579	Q03455	2	2	Probable zinc transporter MSC2	MSC2	>sp|Q03455|MSC2_YEAST Probable zinc transporter MSC2 OS=Saccharomyces cerevisiae (strain ATCC 204508 / S288c) GN=MSC2 PE=1 SV=2	1	2	2	0	2	0	2.9
580	Q03529	2	2	Ceramide very long chain fatty acid hydroxylase SCS7	SCS7	>sp|Q03529|SCS7_YEAST Ceramide very long chain fatty acid hydroxylase SCS7 OS=Saccharomyces cerevisiae (strain ATCC 204508 / S288c) GN=SCS7 PE=1 SV=1	1	2	2	1	1	4.7	1.8
581	Q03690	34	34	Clustered mitochondria protein 1	CLU1	>sp|Q03690|TIF31_YEAST Clustered mitochondria protein 1 OS=Saccharomyces cerevisiae (strain ATCC 204508 / S288c) GN=CLU1 PE=1 SV=1	1	34	34	28	26	25.8	24.9
582	Q03707	1	1	Inner nuclear membrane protein SRC1	SRC1	>sp|Q03707|SRC1_YEAST Inner nuclear membrane protein SRC1 OS=Saccharomyces cerevisiae (strain ATCC 204508 / S288c) GN=SRC1 PE=1 SV=2	1	1	1	1	0	1.3	0
583	Q03714	1	1	U1 SNP1-associating protein 1	USA1	>sp|Q03714|USA1_YEAST U1 SNP1-associating protein 1 OS=Saccharomyces cerevisiae (strain ATCC 204508 / S288c) GN=USA1 PE=1 SV=1	1	1	1	1	0	2.1	0
584	Q03785	1	1	Serine/threonine-protein kinase VHS1	VHS1	>sp|Q03785|VHS1_YEAST Serine/threonine-protein kinase VHS1 OS=Saccharomyces cerevisiae (strain ATCC 204508 / S288c) GN=VHS1 PE=1 SV=1	1	1	1	1	1	1.5	1.5
585	Q03787	2	2	Uncharacterized protein YDR249C	YDR249C	>sp|Q03787|YD249_YEAST Uncharacterized protein YDR249C OS=Saccharomyces cerevisiae (strain ATCC 204508 / S288c) GN=YDR249C PE=2 SV=1	1	2	2	2	0	6.2	0
586	Q03834	3	3	DNA mismatch repair protein MSH6	MSH6	>sp|Q03834|MSH6_YEAST DNA mismatch repair protein MSH6 OS=Saccharomyces cerevisiae (strain ATCC 204508 / S288c) GN=MSH6 PE=1 SV=1	1	3	3	1	2	1.1	3.5
587	Q03921	2	2	Protein dopey	DOP1	>sp|Q03921|DOP1_YEAST Protein dopey OS=Saccharomyces cerevisiae (strain ATCC 204508 / S288c) GN=DOP1 PE=1 SV=1	1	2	2	1	1	1.1	0.6
588	Q03956	1	1	Regulator of V-ATPase in vacuolar membrane protein 2	RAV2	>sp|Q03956|RAV2_YEAST Regulator of V-ATPase in vacuolar membrane protein 2 OS=Saccharomyces cerevisiae (strain ATCC 204508 / S288c) GN=RAV2 PE=1 SV=1	1	1	1	1	0	5.7	0
589	Q03964	7	1	Transposon Ty1-DR2 Gag polyprotein;Capsid protein;Gag-p4	TY1A-DR2	>sp|Q03964|YD17A_YEAST Transposon Ty1-DR2 Gag polyprotein OS=Saccharomyces cerevisiae (strain ATCC 204508 / S288c) GN=TY1A-DR2 PE=3 SV=1	1	7	1	7	3	18	7.3
590	Q04087	1	1	Monopolin complex subunit LRS4	LRS4	>sp|Q04087|LRS4_YEAST Monopolin complex subunit LRS4 OS=Saccharomyces cerevisiae (strain ATCC 204508 / S288c) GN=LRS4 PE=1 SV=1	1	1	1	1	0	2.9	0
591	Q04195	1	1	E3 SUMO-protein ligase SIZ1	SIZ1	>sp|Q04195|SIZ1_YEAST E3 SUMO-protein ligase SIZ1 OS=Saccharomyces cerevisiae (strain ATCC 204508 / S288c) GN=SIZ1 PE=1 SV=1	1	1	1	0	1	0	1
592	Q04201	1	1	CUE domain-containing protein CUE4	CUE4	>sp|Q04201|CUE4_YEAST CUE domain-containing protein CUE4 OS=Saccharomyces cerevisiae (strain ATCC 204508 / S288c) GN=CUE4 PE=1 SV=1	1	1	1	1	1	23.9	23.9
593	Q04235	2	2	tRNA wybutosine-synthesizing protein 2	TRM12	>sp|Q04235|TYW2_YEAST tRNA wybutosine-synthesizing protein 2 OS=Saccharomyces cerevisiae (strain ATCC 204508 / S288c) GN=TRM12 PE=1 SV=1	1	2	2	2	0	6.5	0
594	Q04264	2	2	Sister chromatid cohesion protein PDS5	PDS5	>sp|Q04264|PDS5_YEAST Sister chromatid cohesion protein PDS5 OS=Saccharomyces cerevisiae (strain ATCC 204508 / S288c) GN=PDS5 PE=1 SV=1	1	2	2	2	1	3.3	1.3
595	Q04299	13	13	Probable ADP-ribose 1-phosphate phosphatase YML087W		>sp|Q04299|YMX7_YEAST Probable ADP-ribose 1-phosphate phosphatase YML087W OS=Saccharomyces cerevisiae (strain ATCC 204508 / S288c) GN=YMR087W PE=1 SV=1	1	13	13	13	8	53.9	30.6
596	Q04311	1	1	Protein VMS1	VMS1	>sp|Q04311|VMS1_YEAST Protein VMS1 OS=Saccharomyces cerevisiae (strain ATCC 204508 / S288c) GN=VMS1 PE=1 SV=1	1	1	1	0	1	0	3.3
597	Q04344	7	7	Hit family protein 1	HNT1	>sp|Q04344|HNT1_YEAST Hit family protein 1 OS=Saccharomyces cerevisiae (strain ATCC 204508 / S288c) GN=HNT1 PE=1 SV=2	1	7	7	7	5	58.2	43.7
598	Q04368	1	1	Cop9 signalosome-interactor 1	CSI1	>sp|Q04368|CSI1_YEAST Cop9 signalosome-interactor 1 OS=Saccharomyces cerevisiae (strain ATCC 204508 / S288c) GN=CSI1 PE=1 SV=1	1	1	1	0	1	0	3.7
599	Q04399	9	9	Putative multicopper oxidase YDR506C		>sp|Q04399|YD506_YEAST Putative multicopper oxidase YDR506C OS=Saccharomyces cerevisiae (strain ATCC 204508 / S288c) GN=YDR506C PE=1 SV=1	1	9	9	5	8	11.8	16.6
600	Q04412	14	14	ADP-ribosylation factor GTPase-activating protein effector protein 1	AGE1	>sp|Q04412|AGE1_YEAST ADP-ribosylation factor GTPase-activating protein effector protein 1 OS=Saccharomyces cerevisiae (strain ATCC 204508 / S288c) GN=AGE1 PE=1 SV=1	1	14	14	12	14	28.4	28.8
601	Q04461	11	11	Uncharacterized protein YMR111C		>sp|Q04461|YM01_YEAST Uncharacterized protein YMR111C OS=Saccharomyces cerevisiae (strain ATCC 204508 / S288c) GN=YMR111C PE=1 SV=1	1	11	11	11	0	31	0
602	Q04545	5	5	Probable transcription factor TDA9	TDA9	>sp|Q04545|TDA9_YEAST Probable transcription factor TDA9 OS=Saccharomyces cerevisiae (strain ATCC 204508 / S288c) GN=TDA9 PE=1 SV=1	1	5	5	5	2	4.6	1.8
603	Q04602	1	1	Vacuolar basic amino acid transporter 4	VBA4	>sp|Q04602|VBA4_YEAST Vacuolar basic amino acid transporter 4 OS=Saccharomyces cerevisiae (strain ATCC 204508 / S288c) GN=VBA4 PE=1 SV=1	1	1	1	0	1	0	2.7
604	Q04689	21	21	Altered inheritance of mitochondria protein 32	AIM32	>sp|Q04689|AIM32_YEAST Altered inheritance of mitochondria protein 32 OS=Saccharomyces cerevisiae (strain ATCC 204508 / S288c) GN=AIM32 PE=2 SV=1	1	21	21	21	12	69.5	42.8
605	Q04697	2	2	Glucose-signaling factor 2	GSF2	>sp|Q04697|GSF2_YEAST Glucose-signaling factor 2 OS=Saccharomyces cerevisiae (strain ATCC 204508 / S288c) GN=GSF2 PE=1 SV=1	1	2	2	1	2	2.7	4.5
606	Q04792	30	30	Glutamate decarboxylase	GAD1	>sp|Q04792|DCE_YEAST Glutamate decarboxylase OS=Saccharomyces cerevisiae (strain ATCC 204508 / S288c) GN=GAD1 PE=1 SV=1	1	30	30	30	21	55.2	37.6
607	Q04839	1	1	mRNA transport factor GFD1	GFD1	>sp|Q04839|GFD1_YEAST mRNA transport factor GFD1 OS=Saccharomyces cerevisiae (strain ATCC 204508 / S288c) GN=GFD1 PE=1 SV=1	1	1	1	1	0	5.3	0
608	Q04868	1	1	Elongator complex protein 6	ELP6	>sp|Q04868|ELP6_YEAST Elongator complex protein 6 OS=Saccharomyces cerevisiae (strain ATCC 204508 / S288c) GN=ELP6 PE=1 SV=1	1	1	1	1	0	5.9	0
609	Q04895	1	1	Allantoin permease	DAL4	>sp|Q04895|DAL4_YEAST Allantoin permease OS=Saccharomyces cerevisiae (strain ATCC 204508 / S288c) GN=DAL4 PE=1 SV=1	1	1	1	0	1	0	2.4
610	Q04947	14	14	Reticulon-like protein 1	RTN1	>sp|Q04947|RTN1_YEAST Reticulon-like protein 1 OS=Saccharomyces cerevisiae (strain ATCC 204508 / S288c) GN=RTN1 PE=1 SV=1	1	14	14	8	14	26.1	54.2
611	Q04958	24	24	Lysophospholipase NTE1	NTE1	>sp|Q04958|NTE1_YEAST Lysophospholipase NTE1 OS=Saccharomyces cerevisiae (strain ATCC 204508 / S288c) GN=NTE1 PE=1 SV=1	1	24	24	18	21	14.6	16.7
612	Q04991	2	2	Protein FMP42	FMP42	>sp|Q04991|FMP42_YEAST Protein FMP42 OS=Saccharomyces cerevisiae (strain ATCC 204508 / S288c) GN=FMP42 PE=1 SV=1	1	2	2	1	1	1.4	3
613	Q05022	2	2	rRNA biogenesis protein RRP5	RRP5	>sp|Q05022|RRP5_YEAST rRNA biogenesis protein RRP5 OS=Saccharomyces cerevisiae (strain ATCC 204508 / S288c) GN=RRP5 PE=1 SV=1	1	2	2	2	0	1.3	0
614	Q05359	6	6	Protein ERP1	ERP1	>sp|Q05359|ERP1_YEAST Protein ERP1 OS=Saccharomyces cerevisiae (strain ATCC 204508 / S288c) GN=ERP1 PE=1 SV=1	1	6	6	4	5	21.9	22.8
615	Q05471	12	12	Helicase SWR1	SWR1	>sp|Q05471|SWR1_YEAST Helicase SWR1 OS=Saccharomyces cerevisiae (strain ATCC 204508 / S288c) GN=SWR1 PE=1 SV=1	1	12	12	12	0	9.9	0
616	Q05580	44	44	LIM domain and RING finger protein YDR266C	YDR266C	>sp|Q05580|YD266_YEAST LIM domain and RING finger protein YDR266C OS=Saccharomyces cerevisiae (strain ATCC 204508 / S288c) GN=YDR266C PE=1 SV=1	1	44	44	44	32	72.3	55.1
617	Q05635	2	2	Ribonuclease H2 subunit B	RNH202	>sp|Q05635|RNH2B_YEAST Ribonuclease H2 subunit B OS=Saccharomyces cerevisiae (strain ATCC 204508 / S288c) GN=RNH202 PE=1 SV=1	1	2	2	1	1	3.7	6
618	Q05779	3	3	Ubiquinone biosynthesis protein COQ9, mitochondrial	COQ9	>sp|Q05779|COQ9_YEAST Ubiquinone biosynthesis protein COQ9, mitochondrial OS=Saccharomyces cerevisiae (strain ATCC 204508 / S288c) GN=COQ9 PE=1 SV=1	1	3	3	3	0	11.2	0
619	Q05892	1	1	Uncharacterized protein YLR290C, mitochondrial	YLR290C	>sp|Q05892|YL290_YEAST Uncharacterized protein YLR290C, mitochondrial OS=Saccharomyces cerevisiae (strain ATCC 204508 / S288c) GN=YLR290C PE=1 SV=1	1	1	1	1	0	2.9	0
620	Q05900	7	7	U1 small nuclear ribonucleoprotein C	YHC1	>sp|Q05900|RU1C_YEAST U1 small nuclear ribonucleoprotein C OS=Saccharomyces cerevisiae (strain ATCC 204508 / S288c) GN=YHC1 PE=1 SV=1	1	7	7	7	0	37.2	0
621	Q05911	5	5	Adenylosuccinate lyase	ADE13	>sp|Q05911|PUR8_YEAST Adenylosuccinate lyase OS=Saccharomyces cerevisiae (strain ATCC 204508 / S288c) GN=ADE13 PE=1 SV=1	1	5	5	1	4	2.7	10.4
622	Q06010	2	2	A-factor-processing enzyme	STE23	>sp|Q06010|STE23_YEAST A-factor-processing enzyme OS=Saccharomyces cerevisiae (strain ATCC 204508 / S288c) GN=STE23 PE=1 SV=2	1	2	2	0	2	0	1.8
623	Q06096	1	1	Conserved oligomeric Golgi complex subunit 4	COG4	>sp|Q06096|COG4_YEAST Conserved oligomeric Golgi complex subunit 4 OS=Saccharomyces cerevisiae (strain ATCC 204508 / S288c) GN=COG4 PE=1 SV=1	1	1	1	1	0	0.8	0
624	Q06144;P53224	2;1	2;1	Protein ORM2;Protein ORM1	ORM2;ORM1	>sp|Q06144|ORM2_YEAST Protein ORM2 OS=Saccharomyces cerevisiae (strain ATCC 204508 / S288c) GN=ORM2 PE=1 SV=1;>sp|P53224|ORM1_YEAST Protein ORM1 OS=Saccharomyces cerevisiae (strain ATCC 204508 / S288c) GN=ORM1 PE=1 SV=1	2	2	2	0	2	0	16.7
625	Q06147	1	1	Sphingoid long chain base kinase 5	LCB5	>sp|Q06147|LCB5_YEAST Sphingoid long chain base kinase 5 OS=Saccharomyces cerevisiae (strain ATCC 204508 / S288c) GN=LCB5 PE=1 SV=1	1	1	1	1	0	1.2	0
626	Q06148	1	1	Non-homologous end-joining protein 1	NEJ1	>sp|Q06148|NEJ1_YEAST Non-homologous end-joining protein 1 OS=Saccharomyces cerevisiae (strain ATCC 204508 / S288c) GN=NEJ1 PE=1 SV=1	1	1	1	0	1	0	7.3
627	Q06151	22	22	m7GpppX diphosphatase	DCS1	>sp|Q06151|DCPS_YEAST m7GpppX diphosphatase OS=Saccharomyces cerevisiae (strain ATCC 204508 / S288c) GN=DCS1 PE=1 SV=1	1	22	22	21	18	60.3	48.3
628	Q06178	29;9	29;9	Nicotinamide-nucleotide adenylyltransferase 1	NMA1	>sp|Q06178|NMA1_YEAST Nicotinamide-nucleotide adenylyltransferase 1 OS=Saccharomyces cerevisiae (strain ATCC 204508 / S288c) GN=NMA1 PE=1 SV=1	2	29	29	23	29	58.9	60.8
629	Q06179	3	3	Protein FMP27, mitochondrial	FMP27	>sp|Q06179|FMP27_YEAST Protein FMP27, mitochondrial OS=Saccharomyces cerevisiae (strain ATCC 204508 / S288c) GN=FMP27 PE=1 SV=1	1	3	3	1	3	0.3	1.3
630	Q06211	1	1	Methyl methanesulfonate-sensitivity protein 1	MMS1	>sp|Q06211|MMS1_YEAST Methyl methanesulfonate-sensitivity protein 1 OS=Saccharomyces cerevisiae (strain ATCC 204508 / S288c) GN=MMS1 PE=1 SV=1	1	1	1	1	1	0.9	0.9
631	Q06218	4	4	ATP-dependent RNA helicase DBP9	DBP9	>sp|Q06218|DBP9_YEAST ATP-dependent RNA helicase DBP9 OS=Saccharomyces cerevisiae (strain ATCC 204508 / S288c) GN=DBP9 PE=1 SV=1	1	4	4	3	3	5.9	6.6
632	Q06405	2	2	ATP synthase subunit f, mitochondrial	ATP17	>sp|Q06405|ATPK_YEAST ATP synthase subunit f, mitochondrial OS=Saccharomyces cerevisiae (strain ATCC 204508 / S288c) GN=ATP17 PE=1 SV=1	1	2	2	2	1	19.8	10.9
633	Q06479	26	26	F-box protein YLR352W	YLR352W	>sp|Q06479|YL352_YEAST F-box protein YLR352W OS=Saccharomyces cerevisiae (strain ATCC 204508 / S288c) GN=YLR352W PE=1 SV=1	1	26	26	26	7	39.3	10.8
634	Q06488	22	21	Chromatin structure-remodeling complex subunit RSC2	RSC2	>sp|Q06488|RSC2_YEAST Chromatin structure-remodeling complex subunit RSC2 OS=Saccharomyces cerevisiae (strain ATCC 204508 / S288c) GN=RSC2 PE=1 SV=1	1	22	21	22	0	31.2	0
635	Q06489	1	1	Methylthioribose-1-phosphate isomerase	MRI1	>sp|Q06489|MTNA_YEAST Methylthioribose-1-phosphate isomerase OS=Saccharomyces cerevisiae (strain ATCC 204508 / S288c) GN=MRI1 PE=1 SV=1	1	1	1	1	0	3.4	0
636	Q06512	5	5	Nucleolar complex protein 4	NOC4	>sp|Q06512|NOC4_YEAST Nucleolar complex protein 4 OS=Saccharomyces cerevisiae (strain ATCC 204508 / S288c) GN=NOC4 PE=1 SV=1	1	5	5	5	1	12.9	2.2
637	Q06522	5	5	Uncharacterized protein YPR147C	YPR147C	>sp|Q06522|YP147_YEAST Uncharacterized protein YPR147C OS=Saccharomyces cerevisiae (strain ATCC 204508 / S288c) GN=YPR147C PE=1 SV=1	1	5	5	5	3	22	14.1
638	Q06563	2	2	Protein SYM1	SYM1	>sp|Q06563|SYM1_YEAST Protein SYM1 OS=Saccharomyces cerevisiae (strain ATCC 204508 / S288c) GN=SYM1 PE=1 SV=1	1	2	2	2	0	12.7	0
639	Q06592	1	1	Histone acetyltransferase HPA2	HPA2	>sp|Q06592|HPA2_YEAST Histone acetyltransferase HPA2 OS=Saccharomyces cerevisiae (strain ATCC 204508 / S288c) GN=HPA2 PE=1 SV=1	1	1	1	1	0	7.7	0
640	Q06625	29	29	Glycogen debranching enzyme;4-alpha-glucanotransferase;Amylo-alpha-1,6-glucosidase	GDB1	>sp|Q06625|GDE_YEAST Glycogen debranching enzyme OS=Saccharomyces cerevisiae (strain ATCC 204508 / S288c) GN=GDB1 PE=1 SV=1	1	29	29	29	13	23.6	11.7
641	Q06648	1	1	GTPase-interacting component 2	GIC2	>sp|Q06648|GIC2_YEAST GTPase-interacting component 2 OS=Saccharomyces cerevisiae (strain ATCC 204508 / S288c) GN=GIC2 PE=1 SV=1	1	1	1	1	0	3.1	0
642	Q06679	1	1	U3 small nucleolar RNA-associated protein 4	UTP4	>sp|Q06679|UTP4_YEAST U3 small nucleolar RNA-associated protein 4 OS=Saccharomyces cerevisiae (strain ATCC 204508 / S288c) GN=UTP4 PE=1 SV=1	1	1	1	0	1	0	3.4
643	Q06681	2	2	GRAM domain-containing protein YSP2	YSP2	>sp|Q06681|YSP2_YEAST GRAM domain-containing protein YSP2 OS=Saccharomyces cerevisiae (strain ATCC 204508 / S288c) GN=YSP2 PE=1 SV=1	1	2	2	2	1	1.9	1.3
644	Q06683	2	2	Putative ATP-dependent helicase IRC3	IRC3	>sp|Q06683|IRC3_YEAST Putative ATP-dependent helicase IRC3 OS=Saccharomyces cerevisiae (strain ATCC 204508 / S288c) GN=IRC3 PE=1 SV=1	1	2	2	0	2	0	3.6
645	Q06705	3	3	Phosphatidylinositol transfer protein CSR1	CSR1	>sp|Q06705|CSR1_YEAST Phosphatidylinositol transfer protein CSR1 OS=Saccharomyces cerevisiae (strain ATCC 204508 / S288c) GN=CSR1 PE=1 SV=1	1	3	3	3	0	10.5	0
646	Q06706	1	1	Elongator complex protein 1	IKI3	>sp|Q06706|ELP1_YEAST Elongator complex protein 1 OS=Saccharomyces cerevisiae (strain ATCC 204508 / S288c) GN=IKI3 PE=1 SV=1	1	1	1	0	1	0	0.6
647	Q07351	3	3	Zinc finger protein STP4	STP4	>sp|Q07351|STP4_YEAST Zinc finger protein STP4 OS=Saccharomyces cerevisiae (strain ATCC 204508 / S288c) GN=STP4 PE=1 SV=2	1	3	3	3	0	11.8	0
648	Q07379	1	1	Putative uncharacterized protein YDL057W	YDL057W	>sp|Q07379|YD057_YEAST Putative uncharacterized protein YDL057W OS=Saccharomyces cerevisiae (strain ATCC 204508 / S288c) GN=YDL057W PE=2 SV=1	1	1	1	1	1	3.7	3.7
649	Q07381	4	4	Ribosome biogenesis protein TSR1	TSR1	>sp|Q07381|TSR1_YEAST Ribosome biogenesis protein TSR1 OS=Saccharomyces cerevisiae (strain ATCC 204508 / S288c) GN=TSR1 PE=1 SV=1	1	4	4	3	1	5.1	1.8
650	Q07457	1	1	E3 ubiquitin-protein ligase BRE1	BRE1	>sp|Q07457|BRE1_YEAST E3 ubiquitin-protein ligase BRE1 OS=Saccharomyces cerevisiae (strain ATCC 204508 / S288c) GN=BRE1 PE=1 SV=1	1	1	1	1	0	1.9	0
651	Q07478	1	1	ATP-dependent RNA helicase SUB2	SUB2	>sp|Q07478|SUB2_YEAST ATP-dependent RNA helicase SUB2 OS=Saccharomyces cerevisiae (strain ATCC 204508 / S288c) GN=SUB2 PE=1 SV=1	1	1	1	1	1	6.3	6.3
652	Q07528	1	1	Autophagy-related protein 20	ATG20	>sp|Q07528|ATG20_YEAST Autophagy-related protein 20 OS=Saccharomyces cerevisiae (strain ATCC 204508 / S288c) GN=ATG20 PE=1 SV=1	1	1	1	1	0	1.6	0
653	Q07653	57	57	Protein HBT1	HBT1	>sp|Q07653|HBT1_YEAST Protein HBT1 OS=Saccharomyces cerevisiae (strain ATCC 204508 / S288c) GN=HBT1 PE=1 SV=1	1	57	57	7	57	10.2	72.8
654	Q07655	22	22	Protein WHI4	WHI4	>sp|Q07655|WHI4_YEAST Protein WHI4 OS=Saccharomyces cerevisiae (strain ATCC 204508 / S288c) GN=WHI4 PE=1 SV=1	1	22	22	19	15	41.3	31
655	Q07657	7	7	Seventh homolog of septin 1	SHS1	>sp|Q07657|SHS1_YEAST Seventh homolog of septin 1 OS=Saccharomyces cerevisiae (strain ATCC 204508 / S288c) GN=SHS1 PE=1 SV=1	1	7	7	7	0	12.2	0
656	Q07807	34	34	mRNA-binding protein PUF3	PUF3	>sp|Q07807|PUF3_YEAST mRNA-binding protein PUF3 OS=Saccharomyces cerevisiae (strain ATCC 204508 / S288c) GN=PUF3 PE=1 SV=1	1	34	34	33	24	45.1	30.8
657	Q07879	1	1	Ubiquitin-like-conjugating enzyme ATG10	ATG10	>sp|Q07879|ATG10_YEAST Ubiquitin-like-conjugating enzyme ATG10 OS=Saccharomyces cerevisiae (strain ATCC 204508 / S288c) GN=ATG10 PE=1 SV=1	1	1	1	1	0	7.8	0
658	Q07938	8	8	S-methyl-5-thioadenosine phosphorylase	MEU1	>sp|Q07938|MTAP_YEAST S-methyl-5-thioadenosine phosphorylase OS=Saccharomyces cerevisiae (strain ATCC 204508 / S288c) GN=MEU1 PE=1 SV=1	1	8	8	7	5	24.9	18.7
659	Q07979	4	4	Chromatin structure-remodeling complex protein RSC58	RSC58	>sp|Q07979|RSC58_YEAST Chromatin structure-remodeling complex protein RSC58 OS=Saccharomyces cerevisiae (strain ATCC 204508 / S288c) GN=RSC58 PE=1 SV=1	1	4	4	3	1	7.6	2.4
660	Q08179	1	1	Mitochondrial distribution and morphology protein 38	MDM38	>sp|Q08179|MDM38_YEAST Mitochondrial distribution and morphology protein 38 OS=Saccharomyces cerevisiae (strain ATCC 204508 / S288c) GN=MDM38 PE=1 SV=1	1	1	1	1	0	3.1	0
661	Q08204	2	2	Structural maintenance of chromosomes protein 5	SMC5	>sp|Q08204|SMC5_YEAST Structural maintenance of chromosomes protein 5 OS=Saccharomyces cerevisiae (strain ATCC 204508 / S288c) GN=SMC5 PE=1 SV=1	1	2	2	2	0	2	0
662	Q08216	1	1	Putative uncharacterized protein YOL046C		>sp|Q08216|YO046_YEAST Putative uncharacterized protein YOL046C OS=Saccharomyces cerevisiae (strain ATCC 204508 / S288c) GN=YOL046C PE=5 SV=1	1	1	1	0	1	0	9.8
663	Q08235	1	1	Ribosome biogenesis protein BRX1	BRX1	>sp|Q08235|BRX1_YEAST Ribosome biogenesis protein BRX1 OS=Saccharomyces cerevisiae (strain ATCC 204508 / S288c) GN=BRX1 PE=1 SV=2	1	1	1	0	1	0	6.9
664	Q08409	2	2	ATP-dependent permease AUS1	AUS1	>sp|Q08409|AUS1_YEAST ATP-dependent permease AUS1 OS=Saccharomyces cerevisiae (strain ATCC 204508 / S288c) GN=AUS1 PE=2 SV=1	1	2	2	1	1	0.9	1.7
665	Q08457	1	1	Mitochondrial morphogenesis protein SLD7	SLD7	>sp|Q08457|SLD7_YEAST Mitochondrial morphogenesis protein SLD7 OS=Saccharomyces cerevisiae (strain ATCC 204508 / S288c) GN=SLD7 PE=1 SV=1	1	1	1	0	1	0	3.1
666	Q08484	36	36	GTPase-activating protein GYP1	GYP1	>sp|Q08484|GYP1_YEAST GTPase-activating protein GYP1 OS=Saccharomyces cerevisiae (strain ATCC 204508 / S288c) GN=GYP1 PE=1 SV=1	1	36	36	32	35	49.5	56
667	Q08728	1	1	Putative uncharacterized protein YOR263C		>sp|Q08728|YO263_YEAST Putative uncharacterized protein YOR263C OS=Saccharomyces cerevisiae (strain ATCC 204508 / S288c) GN=YOR263C PE=5 SV=1	1	1	1	1	0	13.3	0
668	Q08732	52	52	Serine/threonine-protein kinase HRK1	HRK1	>sp|Q08732|HRK1_YEAST Serine/threonine-protein kinase HRK1 OS=Saccharomyces cerevisiae (strain ATCC 204508 / S288c) GN=HRK1 PE=1 SV=1	1	52	52	44	52	57.7	61.8
669	Q08831	19	19	Protein VTS1	VTS1	>sp|Q08831|VTS1_YEAST Protein VTS1 OS=Saccharomyces cerevisiae (strain ATCC 204508 / S288c) GN=VTS1 PE=1 SV=1	1	19	19	17	14	39.8	28.1
670	Q08887	1	1	Nuclear division defective protein 1	NDD1	>sp|Q08887|NDD1_YEAST Nuclear division defective protein 1 OS=Saccharomyces cerevisiae (strain ATCC 204508 / S288c) GN=NDD1 PE=1 SV=1	1	1	1	1	0	3.6	0
671	Q08902	1	1	Drug resistance protein YOR378W	YOR378W	>sp|Q08902|YO378_YEAST Drug resistance protein YOR378W OS=Saccharomyces cerevisiae (strain ATCC 204508 / S288c) GN=YOR378W PE=1 SV=1	1	1	1	1	0	1.9	0
672	Q08923	2	2	Histone deacetylase complex subunit CTI6	CTI6	>sp|Q08923|CTI6_YEAST Histone deacetylase complex subunit CTI6 OS=Saccharomyces cerevisiae (strain ATCC 204508 / S288c) GN=CTI6 PE=1 SV=1	1	2	2	2	0	3.8	0
673	Q08949	1	1	DNA damage checkpoint protein 1	DDC1	>sp|Q08949|DDC1_YEAST DNA damage checkpoint protein 1 OS=Saccharomyces cerevisiae (strain ATCC 204508 / S288c) GN=DDC1 PE=1 SV=1	1	1	1	0	1	0	3.3
674	Q08970	22	22	Mitochondrial metal transporter 2	MMT2	>sp|Q08970|MMT2_YEAST Mitochondrial metal transporter 2 OS=Saccharomyces cerevisiae (strain ATCC 204508 / S288c) GN=MMT2 PE=1 SV=2	1	22	22	13	22	22.9	41.5
675	Q12010	1	1	Uncharacterized membrane protein YOL092W		>sp|Q12010|YO092_YEAST Uncharacterized membrane protein YOL092W OS=Saccharomyces cerevisiae (strain ATCC 204508 / S288c) GN=YOL092W PE=1 SV=1	1	1	1	0	1	0	2.9
676	Q12019	2	2	Midasin	MDN1	>sp|Q12019|MDN1_YEAST Midasin OS=Saccharomyces cerevisiae (strain ATCC 204508 / S288c) GN=MDN1 PE=1 SV=1	1	2	2	2	0	0.6	0
677	Q12028	1	1	AP-1 complex subunit gamma-1	APL4	>sp|Q12028|AP1G1_YEAST AP-1 complex subunit gamma-1 OS=Saccharomyces cerevisiae (strain ATCC 204508 / S288c) GN=APL4 PE=1 SV=1	1	1	1	1	0	0.8	0
678	Q12083	1	1	DNA mismatch repair protein MLH3	MLH3	>sp|Q12083|MLH3_YEAST DNA mismatch repair protein MLH3 OS=Saccharomyces cerevisiae (strain ATCC 204508 / S288c) GN=MLH3 PE=1 SV=1	1	1	1	0	1	0	0.8
679	Q12100	48	48	Probable serine/threonine-protein kinase RTK1	RTK1	>sp|Q12100|RTK1_YEAST Probable serine/threonine-protein kinase RTK1 OS=Saccharomyces cerevisiae (strain ATCC 204508 / S288c) GN=RTK1 PE=1 SV=1	1	48	48	38	48	69	72.6
680	Q12111	1	1	Putative uncharacterized protein YDR029W	YDR029W	>sp|Q12111|YD029_YEAST Putative uncharacterized protein YDR029W OS=Saccharomyces cerevisiae (strain ATCC 204508 / S288c) GN=YDR029W PE=5 SV=1	1	1	1	0	1	0	15.4
681	Q12123	26	26	Protein DCS2	DCS2	>sp|Q12123|DCS2_YEAST Protein DCS2 OS=Saccharomyces cerevisiae (strain ATCC 204508 / S288c) GN=DCS2 PE=1 SV=3	1	26	26	25	23	70.3	68.3
682	Q12128	5	5	Rho-GTPase-activating protein BAG7	BAG7	>sp|Q12128|BAG7_YEAST Rho-GTPase-activating protein BAG7 OS=Saccharomyces cerevisiae (strain ATCC 204508 / S288c) GN=BAG7 PE=1 SV=1	1	5	5	2	4	5.1	13.9
683	Q12142	1	1	Autophagy-related protein 9	ATG9	>sp|Q12142|ATG9_YEAST Autophagy-related protein 9 OS=Saccharomyces cerevisiae (strain ATCC 204508 / S288c) GN=ATG9 PE=1 SV=1	1	1	1	1	0	1.7	0
684	Q12158	2	2	Sister chromatid cohesion protein 1	MCD1	>sp|Q12158|SCC1_YEAST Sister chromatid cohesion protein 1 OS=Saccharomyces cerevisiae (strain ATCC 204508 / S288c) GN=MCD1 PE=1 SV=1	1	2	2	1	1	1.9	3.7
685	Q12182	5	5	Uncharacterized protein YOR342C		>sp|Q12182|YO342_YEAST Uncharacterized protein YOR342C OS=Saccharomyces cerevisiae (strain ATCC 204508 / S288c) GN=YOR342C PE=1 SV=1	1	5	5	5	2	21	9.7
686	Q12232	2	2	Uncharacterized protein SLP1	SLP1	>sp|Q12232|SLP1_YEAST Uncharacterized protein SLP1 OS=Saccharomyces cerevisiae (strain ATCC 204508 / S288c) GN=SLP1 PE=1 SV=1	1	2	2	0	2	0	4.6
687	Q12236	1	1	Serine/threonine-protein kinase PKH2	PKH2	>sp|Q12236|PKH2_YEAST Serine/threonine-protein kinase PKH2 OS=Saccharomyces cerevisiae (strain ATCC 204508 / S288c) GN=PKH2 PE=1 SV=1	1	1	1	1	0	0.7	0
688	Q12272	5	5	tRNA 2-phosphotransferase	TPT1	>sp|Q12272|TPT1_YEAST tRNA 2-phosphotransferase OS=Saccharomyces cerevisiae (strain ATCC 204508 / S288c) GN=TPT1 PE=1 SV=1	1	5	5	5	1	27.4	7.8
689	Q12276	11	10	HMG2-induced ER-remodeling protein 1	HER1	>sp|Q12276|HER1_YEAST HMG2-induced ER-remodeling protein 1 OS=Saccharomyces cerevisiae (strain ATCC 204508 / S288c) GN=HER1 PE=1 SV=1	1	11	10	10	4	11.1	5.5
690	Q12296	5	5	Protein MAM3	MAM3	>sp|Q12296|MAM3_YEAST Protein MAM3 OS=Saccharomyces cerevisiae (strain ATCC 204508 / S288c) GN=MAM3 PE=1 SV=1	1	5	5	2	5	4.2	11.6
691	Q12306	5	5	Ubiquitin-like protein SMT3	SMT3	>sp|Q12306|SMT3_YEAST Ubiquitin-like protein SMT3 OS=Saccharomyces cerevisiae (strain ATCC 204508 / S288c) GN=SMT3 PE=1 SV=1	1	5	5	5	2	47.5	17.8
692	Q12309	2	2	Pre-mRNA-splicing factor CLF1	CLF1	>sp|Q12309|CLF1_YEAST Pre-mRNA-splicing factor CLF1 OS=Saccharomyces cerevisiae (strain ATCC 204508 / S288c) GN=CLF1 PE=1 SV=1	1	2	2	2	0	3.3	0
693	Q12320	6	6	Hydroxyacylglutathione hydrolase, mitochondrial	GLO4	>sp|Q12320|GLO4_YEAST Hydroxyacylglutathione hydrolase, mitochondrial OS=Saccharomyces cerevisiae (strain ATCC 204508 / S288c) GN=GLO4 PE=2 SV=1	1	6	6	6	1	27	7.4
694	Q12321	1	1	Mediator of RNA polymerase II transcription subunit 1	MED1	>sp|Q12321|MED1_YEAST Mediator of RNA polymerase II transcription subunit 1 OS=Saccharomyces cerevisiae (strain ATCC 204508 / S288c) GN=MED1 PE=1 SV=1	1	1	1	1	0	1.1	0
695	Q12329	20	20	Heat shock protein 42	HSP42	>sp|Q12329|HSP42_YEAST Heat shock protein 42 OS=Saccharomyces cerevisiae (strain ATCC 204508 / S288c) GN=HSP42 PE=1 SV=1	1	20	20	20	18	50.1	44.8
696	Q12358	5	5	Alpha-ketoglutarate-dependent sulfonate dioxygenase	JLP1	>sp|Q12358|JLP1_YEAST Alpha-ketoglutarate-dependent sulfonate dioxygenase OS=Saccharomyces cerevisiae (strain ATCC 204508 / S288c) GN=JLP1 PE=2 SV=1	1	5	5	4	1	16.7	1.5
697	Q12369	2	2	Protein SFI1	SFI1	>sp|Q12369|SFI1_YEAST Protein SFI1 OS=Saccharomyces cerevisiae (strain ATCC 204508 / S288c) GN=SFI1 PE=1 SV=1	1	2	2	0	2	0	3.5
698	Q12393	13	13	Genetic interactor of prohibitin 5, mitochondrial	GEP5	>sp|Q12393|GEP5_YEAST Genetic interactor of prohibitin 5, mitochondrial OS=Saccharomyces cerevisiae (strain ATCC 204508 / S288c) GN=GEP5 PE=1 SV=1	1	13	13	13	12	49.1	48.5
699	Q12402	2	2	Protein YOP1	YOP1	>sp|Q12402|YOP1_YEAST Protein YOP1 OS=Saccharomyces cerevisiae (strain ATCC 204508 / S288c) GN=YOP1 PE=1 SV=3	1	2	2	2	2	8.9	8.9
700	Q12405	2	2	Peroxisomal membrane protein LPX1	LPX1	>sp|Q12405|LPX1_YEAST Peroxisomal membrane protein LPX1 OS=Saccharomyces cerevisiae (strain ATCC 204508 / S288c) GN=LPX1 PE=1 SV=1	1	2	2	2	0	7	0
701	Q12407	2	2	Putative metabolite transport protein YDL199C		>sp|Q12407|YD199_YEAST Putative metabolite transport protein YDL199C OS=Saccharomyces cerevisiae (strain ATCC 204508 / S288c) GN=YDL199C PE=1 SV=1	1	2	2	1	1	3.6	2
702	Q12418	2	2	Protein GIS3	GIS3	>sp|Q12418|GIS3_YEAST Protein GIS3 OS=Saccharomyces cerevisiae (strain ATCC 204508 / S288c) GN=GIS3 PE=1 SV=1	1	2	2	1	1	2.4	3.2
703	Q12433	23	23	Protein AHC1	AHC1	>sp|Q12433|AHC1_YEAST Protein AHC1 OS=Saccharomyces cerevisiae (strain ATCC 204508 / S288c) GN=AHC1 PE=1 SV=1	1	23	23	20	22	41.2	48.2
704	Q12443	11	11	Reticulon-like protein 2	RTN2	>sp|Q12443|RTN2_YEAST Reticulon-like protein 2 OS=Saccharomyces cerevisiae (strain ATCC 204508 / S288c) GN=RTN2 PE=1 SV=1	1	11	11	0	11	0	34.9
705	Q12453	1	1	Cytoplasmic export protein 1	CEX1	>sp|Q12453|CEX1_YEAST Cytoplasmic export protein 1 OS=Saccharomyces cerevisiae (strain ATCC 204508 / S288c) GN=CEX1 PE=1 SV=1	1	1	1	1	0	2.6	0
706	Q12461	17	17	Serine/threonine-protein phosphatase 2A activator 2	RRD2	>sp|Q12461|PTPA2_YEAST Serine/threonine-protein phosphatase 2A activator 2 OS=Saccharomyces cerevisiae (strain ATCC 204508 / S288c) GN=RRD2 PE=1 SV=1	1	17	17	14	16	38.5	40.2
707	Q12494	30	30	Inositol hexakisphosphate kinase 1	KCS1	>sp|Q12494|KCS1_YEAST Inositol hexakisphosphate kinase 1 OS=Saccharomyces cerevisiae (strain ATCC 204508 / S288c) GN=KCS1 PE=1 SV=1	1	30	30	28	16	31.6	21.6
708	Q12496	2	2	Uncharacterized protein YOL098C		>sp|Q12496|YO098_YEAST Uncharacterized protein YOL098C OS=Saccharomyces cerevisiae (strain ATCC 204508 / S288c) GN=YOL098C PE=1 SV=1	1	2	2	1	2	1.4	2.2
709	Q12508	2	2	Sporulation protein RMD5	RMD5	>sp|Q12508|RMD5_YEAST Sporulation protein RMD5 OS=Saccharomyces cerevisiae (strain ATCC 204508 / S288c) GN=RMD5 PE=2 SV=1	1	2	2	2	1	6.9	3.8
710	Q12672	8	1	60S ribosomal protein L21-B	RPL21B	>sp|Q12672|RL21B_YEAST 60S ribosomal protein L21-B OS=Saccharomyces cerevisiae (strain ATCC 204508 / S288c) GN=RPL21B PE=1 SV=1	1	8	1	7	5	41.2	36.9
711	Q12680	24	24	Glutamate synthase [NADH]	GLT1	>sp|Q12680|GLT1_YEAST Glutamate synthase [NADH] OS=Saccharomyces cerevisiae (strain ATCC 204508 / S288c) GN=GLT1 PE=1 SV=2	1	24	24	16	14	10.5	8
712	Q12746	8	8	Plasma membrane-associated coenzyme Q6 reductase PGA3	PGA3	>sp|Q12746|PGA3_YEAST Plasma membrane-associated coenzyme Q6 reductase PGA3 OS=Saccharomyces cerevisiae (strain ATCC 204508 / S288c) GN=PGA3 PE=1 SV=1	1	8	8	2	8	6.4	31.1
713	Q3E766	1	1	Uncharacterized protein YMR175W-A	YMR175W-A	>sp|Q3E766|YM175_YEAST Uncharacterized protein YMR175W-A OS=Saccharomyces cerevisiae (strain ATCC 204508 / S288c) GN=YMR175W-A PE=1 SV=1	1	1	1	1	0	25	0
714	Q3E806	1	1	Uncharacterized protein YOR316C-A	YOR316C-A	>sp|Q3E806|YO316_YEAST Uncharacterized protein YOR316C-A OS=Saccharomyces cerevisiae (strain ATCC 204508 / S288c) GN=YOR316C-A PE=2 SV=1	1	1	1	1	0	21.7	0
715	Q8TGK4	1	1	Uncharacterized protein YBR298C-A	YBR298C-A	>sp|Q8TGK4|YB298_YEAST Uncharacterized protein YBR298C-A OS=Saccharomyces cerevisiae (strain ATCC 204508 / S288c) GN=YBR298C-A PE=1 SV=1	1	1	1	0	1	0	28.8
716	Q8TGR9	1	1	Uncharacterized protein YPL152W-A	YPL152W-A	>sp|Q8TGR9|YP152_YEAST Uncharacterized protein YPL152W-A OS=Saccharomyces cerevisiae (strain ATCC 204508 / S288c) GN=YPL152W-A PE=2 SV=1	1	1	1	0	1	0	37.5
717	Q99247	75	75	Uncharacterized WD repeat-containing protein YOL087C		>sp|Q99247|YO087_YEAST Uncharacterized WD repeat-containing protein YOL087C OS=Saccharomyces cerevisiae (strain ATCC 204508 / S288c) GN=YOL087C PE=1 SV=1	1	75	75	64	74	56.6	63.2
718	Q99271	1	1	Na(+)/H(+) antiporter	NHA1	>sp|Q99271|NAH1_YEAST Na(+)/H(+) antiporter OS=Saccharomyces cerevisiae (strain ATCC 204508 / S288c) GN=NHA1 PE=1 SV=1	1	1	1	0	1	0	1.3
719	Q99288	3	3	Putative phosphoglycerate mutase DET1	DET1	>sp|Q99288|DET1_YEAST Broad-range acid phosphatase DET1 OS=Saccharomyces cerevisiae (strain ATCC 204508 / S288c) GN=DET1 PE=1 SV=1	1	3	3	3	0	14.4	0
720	Q99373	1	1	Protein PET20, mitochondrial	PET20	>sp|Q99373|PET20_YEAST Protein PET20, mitochondrial OS=Saccharomyces cerevisiae (strain ATCC 204508 / S288c) GN=PET20 PE=2 SV=1	1	1	1	0	1	0	3.2
