# Supplementary material for: Sumoylation of Rap1 mediates the recruitment of TFIID to promote transcription of ribosomal protein genes
Source: HighWire-hosted journal article supplement (doi:10.1101/gr.185793.114), 2015-03-23
Supplement: Table_S6_-_Strains.docx [file Table_S6_-_Strains.docx]

| **Table S6.** Strains and plasmids used in this study | | |  |
| --- | --- | --- | --- |
| **Strain number** | **Notes** | **Relevant genotype** | **Reference** |
| BY4741 |  | *MATa, his3*Δ*1, leu2Δ0, met15Δ, ura3Δ0* | (Brachmann et al. 1998) |
| RDKY3615 |  | *MATa, ura3-52, leu2Δ1, trp1Δ63, his3-200, lys2-Bgl, hom3-10, ade2Δ1, ade8, YEL069C::URA3* | (Chen and Kolodner 1999) |
| JEY9379 |  | BY4741 *RAP1-GFP:HIS3* | Yeast GFP library, Life Technologies |
| JEY9454 |  | RDKY3615 *ubc9::NAT [pSE362-UBC9, HIS3] HIS6-FLAG-SMT3:KAN* | This study |
| JEY9458 |  | RDKY3615 *ubc9::NAT [pSE362-ubc9-1, HIS3] HIS6-FLAG-SMT3:KAN* | This study |
| JEY9935 |  | RDKY3615 *ubc9::NAT [pSE362-UBC9, HIS3] HIS6-FLAG-SMT3:KAN RAP1-GFP:HIS3* | This study |
| JEY9936 |  | RDKY3615 *ubc9::NAT [pSE362-ubc9-1, HIS3] HIS6-FLAG-SMT3:KAN RAP1-GFP:HIS3* | This study |
| JEY10891 |  | BY4741 *[pRS315, LEU2]* | This study |
| JEY10892 |  | BY4741 *[pAG415-ADH1p-HA-RAP1, LEU2]* | This study |
| JEY10893 |  | BY4741 *[pAG415-ADH1p-HA-rap1K(240,246)R, LEU2]* | This study |
| JEY10894 | *rap1-K9R* allele | BY4741 *[pAG415-ADH1p-HA-rap1K(43,61,69,117,240,246,527,582,651)R ,LEU2]* | This study |
| JEY10844 |  | BY4741 *NAT:GAL1p-HA-RAP1* | This study |
| JEY10895 |  | BY4741 *NAT:GAL1p-HA-RAP1 [pRS315, LEU2]* | This study |
| JEY10896 |  | BY4741 *NAT:GAL1p-HA-RAP1 [pAG415-ADH1p-HA-RAP1, LEU2]* | This study |
| JEY10897 |  | BY4741 *NAT:GAL1p-HA-RAP1 [pAG415-ADH1p-HA-rap1K(240,246)R, LEU2]* | This study |
| JEY10898 | *rap1-K9R* allele | BY4741 *NAT:GAL1p-HA-RAP1 [pAG415-ADH1p-HA-rap1K(43,61,69,117,240,246,527,582,651)R, LEU2]* | This study |
| HZY1017 |  | BY4741 *HIS6-FLAG-SMT3:KAN* | (Zhou et al. 2004) |
| JEY11006 |  | BY4741 *HIS6-FLAG-SMT3:KAN [pAG415-TEF1p-RAP1-HIS10-Myc2, LEU2]* | This study |
| JEY11010 | *rap1-K9R* allele | BY4741 *HIS6-FLAG-SMT3:KAN [pAG415-TEF1p-rap1K(43,61,69,117,240,246,527,582,651)R-HIS10-Myc2, LEU2]* | This study |
| JEY11077 |  | BY4741 *NAT:GAL1p-HA-RAP1 HIS6-FLAG-SMT3:KAN* | This study |
| JEY11088 |  | BY4741 *[pAG415-GPDp-EGFP-RAP1, LEU2]* | This study |
| JEY11089 | *rap1-K3NR* allele | BY4741 *[pAG415-GPDp-EGFP-rap1-K(43,117,118)R, LEU2]* | This study |
| JEY11090 | *rap1-K3CR* allele | BY4741 *[pAG415-GPDp-EGFP-rap1-K(462,463,651)R, LEU2]* | This study |
| JEY11091 | *rap1-K9R* allele | BY4741 *[pAG415-GPDp-EGFP-rap1-K(43,61,69,117,240,246,527,582,651)R, LEU2]* | This study |
| JEY11092 |  | BY4741 *[pAG415-GPDp-EGFP-rap1-K651R), LEU2]* | This study |
| JEY11093 |  | BY4741 *NAT:GAL1p-HA-RAP1 HIS6-FLAG-SMT3:KAN [pAG415-GPDp-EGFP-RAP1, LEU2]* | This study |
| JEY11094 | *rap1-K3NR* allele | BY4741 *NAT:GAL1p-HA-RAP1 HIS6-FLAG-SMT3:KAN [pAG415-GPDp-EGFP-rap1K(43,117,118)R, LEU2]* | This study |
| JEY11095 | *rap1-K3CR* allele | BY4741 *NAT:GAL1p-HA-RAP1 HIS6-FLAG-SMT3:KAN [pAG415-GPDp-EGFP-rap1K(462,463,651)R, LEU2]* | This study |
| JEY11096 | *rap1-K9R* allele | BY4741 *NAT:GAL1p-HA-RAP1 HIS6-FLAG-SMT3:KAN [pAG415-GPDp-EGFP-rap1K(43,61,69,117,240,246,527,582,651)R, LEU2]* | This study |
| JEY11097 |  | BY4741 *NAT:GAL1p-HA-RAP1 HIS6-FLAG-SMT3:KAN [pAG415-GPDp-EGFP-rap1-K651R), LEU2]* | This study |
| JEY11257 | *UASRAP1-RPS19B* | BY4741 *RAP1-GFP:hph HIS6-FLAG-SMT3:KAN NAT*:*UASRAP1-RPS19B* | This study |
| JEY11258 | *UASrap1:SS-RPS19B* | BY4741 *RAP1-GFP:hph HIS6-FLAG-SMT3:KAN NAT*:*UASrap1-SS-RPS19B* | This study |
| JEY11264 |  | RDKY3615 *ubc9::NAT [pSE362-UBC9, HIS3] HIS6-FLAG-SMT3:KAN [pAG425-GPDp-UBC9, LEU2]* | This study |
| JEY11266 |  | RDKY3615 *ubc9::NAT [pSE362-ubc9-1, HIS3] HIS6-FLAG-SMT3:KAN [pAG425-GPDp-UBC9, LEU2]* | This study |

**References**

Brachmann CB, Davies A, Cost GJ, Caputo E, Li J, Hieter P, Boeke JD. 1998. Designer deletion strains derived from Saccharomyces cerevisiae S288C: a useful set of strains and plasmids for PCR-mediated gene disruption and other applications. *Yeast* **14**(2): 115-132.

Chen C, Kolodner RD. 1999. Gross chromosomal rearrangements in Saccharomyces cerevisiae replication and recombination defective mutants. *Nature genetics* **23**(1): 81-85.

Zhou W, Ryan JJ, Zhou H. 2004. Global analyses of sumoylated proteins in Saccharomyces cerevisiae. Induction of protein sumoylation by cellular stresses. *The Journal of biological chemistry* **279**(31): 32262-32268.
