# Supplementary figures and images for: Sumoylation of Rap1 mediates the recruitment of TFIID to promote transcription of ribosomal protein genes
Source: HighWire-hosted journal article supplement (doi:10.1101/gr.185793.114), 2015-03-23

Chymkowitch\_Figure S2

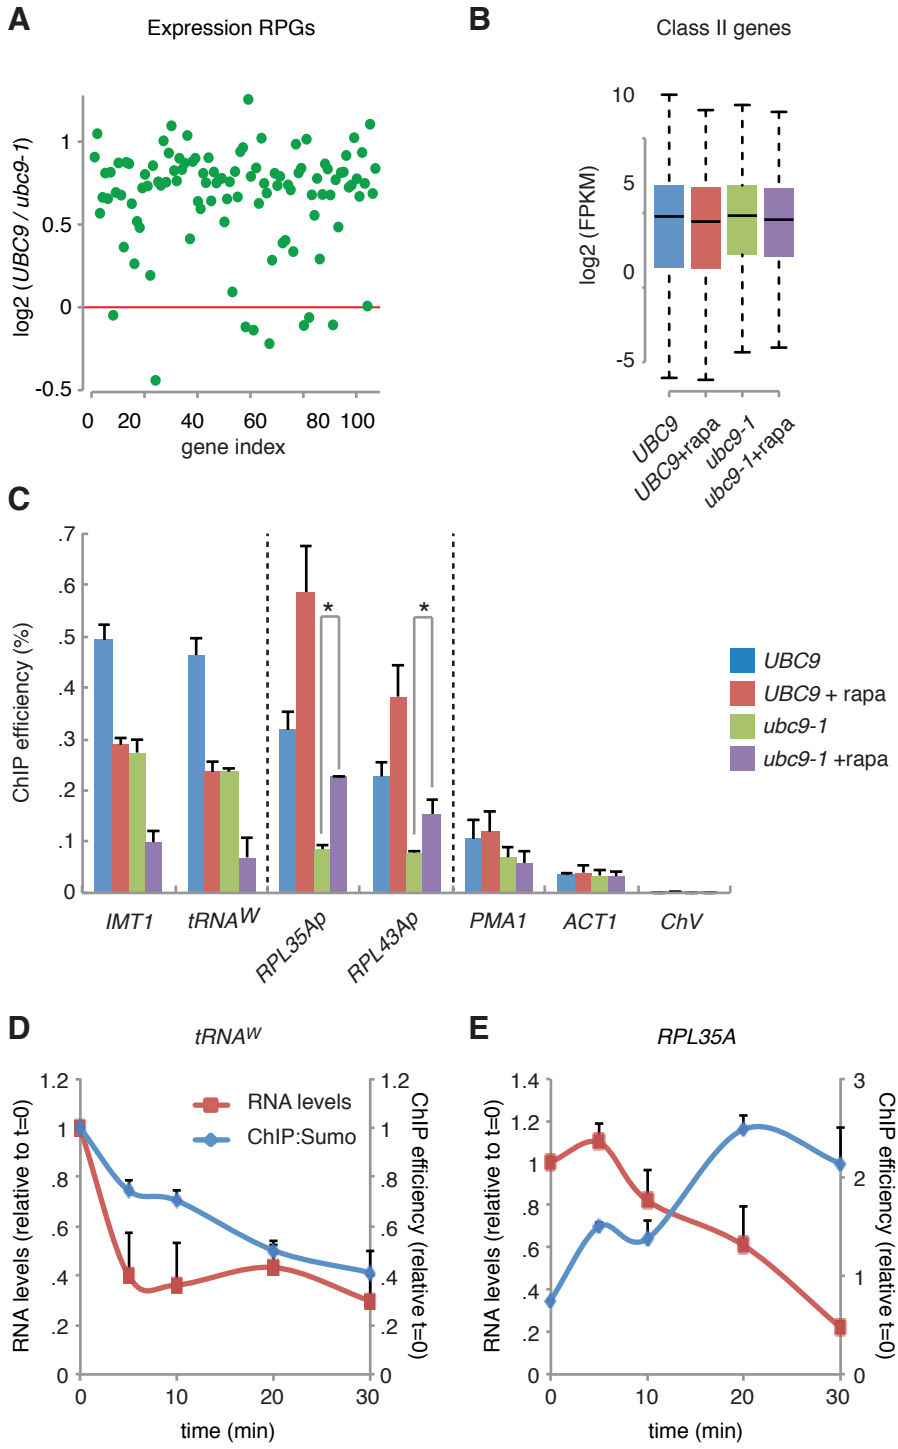

Supplement: FigS2.pdf [file FigS2.pdf]
